# Supplementary material for: Perinatal granulopoiesis and risk of pediatric asthma
Source: eLife. 2021 Feb 10;10:e63745. doi: 10.7554/eLife.63745 (PMC7889076; doi:10.7554/eLife.63745)
Supplement: Supplementary file 1. [file elife-63745-supp1.xlsx]

## Sheet: res_sex
Table S1. Meta-Analysis of CBMC Gene Expression Associated with Newborn Sex
Male (red) and Female (blue) associated genes colored, 1% FDR
entrezgene	HGNC Symbol	Effect Size	SE	z-Score	p-value	p-adj (FDR)	I2	Q-value	Q, p-values	zSco_GSE83393	zSco_GSE60403	zSco_GSE37100	zSco_GSE53473	zSco_GSE485354	zSco_GSE25504	Effect_GSE83393	Effect_GSE60403	Effect_GSE37100	Effect_GSE53473	Effect_GSE485354	Effect_GSE25504	EffectVar_GSE83393	EffectVar_GSE60403	EffectVar_GSE37100	EffectVar_GSE53473	EffectVar_GSE485354	EffectVar_GSE25504
8242	KDM5C	-2.04347	0.208185	-9.81562	9.64e-23	8.68e-19	50.5426	10.1097	0.0721855	-9.23668	-3.15182	-4.18087	-8.83164	-6.56696	-3.93228	-1.8395	-1.89777	-1.55445	-1.87321	-3.28064	-2.80664	0.0396616	0.362548	0.138236	0.0449872	0.249568	0.509431
8284	KDM5D	8.57618	1.08808	7.88198	3.22e-15	1.45e-11	92.5951	67.5232	3.36e-13	14.5251	5.56233	8.56925	13.7315	7.83799	6.17313	4.69256	15.2772	15.2092	4.73147	5.88254	15.865	0.104371	7.54357	3.15014	0.118729	0.563273	6.60493
7403	KDM6A	-2.13712	0.274745	-7.77857	7.33e-15	1.75e-11	70.6441	17.0323	0.0044389	-7.81686	-3.0706	-5.83467	-9.83588	-6.56955	-2.72714	-1.47134	-1.82805	-2.56201	-2.20558	-3.28364	-1.68967	0.0354292	0.35443	0.19281	0.0502829	0.249826	0.383875
8243	SMC1A	-0.953762	0.122737	-7.77078	7.8e-15	1.75e-11	11.673	5.66079	0.340637	-4.40959	-1.96754	-2.97405	-4.8196	-4.54805	-1.66545	-0.762914	-1.04928	-1.03222	-0.89393	-1.75158	-0.965076	0.0299334	0.284406	0.120462	0.0344021	0.148323	0.335784
9086	EIF1AY	8.83379	1.23481	7.15397	8.43e-13	1.52e-09	94.1918	86.0849	0	15.235	5.55721	8.64624	13.0009	8.17088	5.71558	5.7777	14.8698	22.0609	3.94488	7.70085	7.46274	0.143822	7.15968	6.51018	0.0920699	0.888258	1.70481
55655	NLRP2	-0.657885	0.106069	-6.20241	5.56e-10	6.25e-07	0	2.10055	0.835064	-3.87156	-1.19091	-1.82533	-3.42483	-1.71329	-2.48326	-0.664341	-0.609106	-0.609022	-0.620098	-0.574123	-1.5094	0.0294448	0.261594	0.111323	0.0327826	0.112292	0.369457
51321	AMZ2	0.65943	0.106278	6.20476	5.48e-10	6.25e-07	0	2.7035	0.745583	4.7899	1.47817	1.16522	3.30492	1.92973	0.265235	0.834164	0.765686	0.383602	0.597402	0.65017	0.148402	0.0303285	0.268321	0.108379	0.0326746	0.113517	0.313051
126299	ZNF428	0.66353	0.10625	6.245	4.24e-10	6.25e-07	0	2.29901	0.806412	3.96912	1.32954	0.65318	4.24379	1.96303	1.2197	0.682037	0.683928	0.213704	0.778451	0.661982	0.694877	0.0295276	0.264617	0.107043	0.0336477	0.113721	0.324571
51193	ZNF639	0.650418	0.106345	6.11611	9.59e-10	9.58e-07	0	4.86926	0.432044	3.73323	0.558284	0.897667	5.01837	1.09111	0.920304	0.639374	0.280511	0.294434	0.934732	0.361341	0.52	0.0293318	0.252459	0.107583	0.0346935	0.109673	0.31926
55787	TXLNG	-0.64848	0.106333	-6.09858	1.07e-09	9.63e-07	0	4.76167	0.445654	-3.65633	-0.769873	-3.33973	-4.01075	-0.770331	-0.399434	-0.625555	-0.388552	-1.1796	-0.732749	-0.254097	-0.223737	0.0292711	0.254718	0.124751	0.0333779	0.108804	0.313751
60592	SCOC	0.68834	0.114947	5.98834	2.12e-09	1.73e-06	7.78723	5.42224	0.366548	5.31	0.631035	1.52495	4.14317	0.693036	0.486542	0.934042	0.317499	0.505313	0.758651	0.22843	0.272794	0.0309417	0.25315	0.109802	0.0335288	0.108641	0.31436
9332	CD163	-0.63192	0.10591	-5.96658	2.42e-09	1.76e-06	0	1.31775	0.933095	-3.53154	-0.66286	-1.60984	-3.50167	-2.72698	-1.31037	-0.603219	-0.333729	-0.534409	-0.634703	-0.943327	-0.748765	0.0291758	0.25348	0.1102	0.0328542	0.119663	0.326516
5911	RAP2A	0.632305	0.106114	5.95873	2.54e-09	1.76e-06	0	3.49477	0.624179	4.20835	0.853468	1.95989	4.03702	0.394929	0.517649	0.725758	0.431675	0.656222	0.737874	0.129893	0.290349	0.0297413	0.255823	0.112109	0.0334073	0.108177	0.314608
5795	PTPRJ	-0.59627	0.105758	-5.63805	1.72e-08	1.11e-05	0	3.01095	0.698297	-2.71756	-0.146256	-1.68576	-4.15682	-2.36307	-1.29884	-0.459958	-0.0731527	-0.560568	-0.76133	-0.806619	-0.741887	0.028647	0.250167	0.110577	0.0335447	0.116516	0.32626
83483	PLVAP	-0.621537	0.111108	-5.59397	2.22e-08	1.33e-05	4.62968	5.24272	0.386982	-3.40371	-0.809261	-0.939397	-4.16635	-3.04294	0.262157	-0.580452	-0.408836	-0.308278	-0.763203	-1.0669	0.146676	0.0290823	0.255223	0.107693	0.0335559	0.122932	0.313038
1654	DDX3X	-1.68219	0.302583	-5.55944	2.71e-08	1.52e-05	79.5153	24.4084	0.000181186	-5.66942	-2.19207	-6.55745	-6.1926	-5.43667	-2.68593	-1.00493	-1.18893	-3.24671	-1.18782	-2.28508	-1.65847	0.0314189	0.294174	0.245142	0.0367919	0.17666	0.381263
6191	RPS4X	-0.827411	0.15034	-5.50359	3.72e-08	1.97e-05	34.5175	7.63563	0.177493	-2.70006	-2.37788	-3.34122	-3.99239	-3.4673	-1.768	-0.456919	-1.31033	-1.18021	-0.729172	-1.24167	-1.02938	0.0286373	0.303655	0.12477	0.0333575	0.128241	0.338991
29068	ZBTB44	0.562027	0.105632	5.32061	1.03e-07	5.17e-05	0	4.12211	0.531973	3.5135	0.702475	1.15017	4.23721	0.323396	0.459784	0.599999	0.353977	0.378557	0.777153	0.10633	0.257709	0.0291624	0.253916	0.108328	0.0336398	0.108103	0.31416
112942	CFAP36	0.557585	0.105379	5.29123	1.21e-07	5.75e-05	0	1.29619	0.935323	3.43868	0.308599	1.12364	3.58874	1.50937	0.976605	0.58667	0.15453	0.369677	0.651311	0.503531	0.552566	0.0291075	0.250746	0.108241	0.0329376	0.111291	0.320133
51307	FAM53C	-0.554233	0.105389	-5.25893	1.45e-07	6.52e-05	0	2.64072	0.755169	-2.71944	-0.85381	-1.75204	-2.8201	-2.86029	-1.72303	-0.460285	-0.431852	-0.583517	-0.506703	-0.994862	-1.00107	0.028648	0.255828	0.110923	0.0322835	0.120978	0.337554
56993	TOMM22	0.599705	0.119429	5.02143	5.13e-07	0.000219712	12.5211	5.71566	0.334877	4.33799	0.852721	2.02354	3.30876	-0.105787	2.05252	0.749652	0.431289	0.678727	0.598126	-0.0347606	1.21305	0.0298637	0.255813	0.112504	0.032678	0.10797	0.349287
11238	CA5B	-0.866116	0.173937	-4.97949	6.38e-07	0.000260693	48.4798	9.70494	0.0840406	-2.88657	-2.70122	-3.22077	-4.81774	-3.65831	-0.226055	-0.48939	-1.53718	-1.1308	-0.893549	-1.32423	-0.12645	0.028744	0.323842	0.123268	0.0343994	0.131028	0.3129
4066	LYL1	-0.521428	0.105333	-4.95026	7.41e-07	0.000281095	0	4.00426	0.548802	-3.4569	-0.977652	-0.752412	-2.85829	-2.57457	0.489004	-0.589912	-0.496294	-0.246398	-0.51379	-0.885403	0.274182	0.0291207	0.257697	0.107241	0.0323117	0.11827	0.314379
26099	SZRD1	0.520409	0.105176	4.94797	7.5e-07	0.000281095	0	1.77746	0.879	4.04212	1.0644	1.20063	2.35241	1.25172	0.495953	0.695329	0.541881	0.395481	0.420626	0.415576	0.278103	0.0295911	0.259176	0.108501	0.0319717	0.110227	0.314434
7097	TLR2	-0.508194	0.105029	-4.8386	1.31e-06	0.000470517	0	0.824143	0.975468	-3.43879	-1.41037	-1.06052	-2.6011	-1.49944	-0.531993	-0.586689	-0.728182	-0.34859	-0.466241	-0.500117	-0.298451	0.0291075	0.26657	0.108041	0.0321297	0.111246	0.314727
5605	MAP2K2	0.506761	0.105235	4.81552	1.47e-06	0.000507995	0	3.82482	0.574903	3.39107	1.27081	0.148723	3.19113	1.90839	-0.228596	0.578208	0.652071	0.0485287	0.575966	0.642617	-0.127873	0.0290732	0.263287	0.106474	0.0325764	0.113388	0.312909
5613	PRKX	-0.93936	0.198541	-4.73131	2.23e-06	0.000658213	59.9909	12.4972	0.0285753	-8.10062	-1.38147	-1.66732	-5.93185	-1.66832	-0.838841	-1.54016	-0.712303	-0.554204	-1.12963	-0.558473	-0.473106	0.0361488	0.265855	0.110484	0.0362651	0.112058	0.318096
4482	MSRA	-0.499346	0.105087	-4.75172	2.02e-06	0.000658213	0	2.86522	0.720755	-3.07444	-1.53114	-0.207117	-2.65606	-2.30107	-1.12026	-0.522289	-0.795255	-0.067592	-0.476369	-0.783848	-0.636308	0.0288596	0.269763	0.106503	0.032167	0.116039	0.322622
10154	PLXNC1	-0.497949	0.104994	-4.74264	2.11e-06	0.000658213	0	2.1595	0.826664	-2.61096	0.00553541	-1.24249	-3.13411	-1.93541	-1.65007	-0.44147	0.00276771	-0.409548	-0.565259	-0.652182	-0.95551	0.0285891	0.25	0.10865	0.0325287	0.113551	0.335325
23643	LY96	-0.497026	0.105126	-4.72793	2.27e-06	0.000658213	0	3.33245	0.648878	-4.14456	-1.12902	-1.70343	-1.80424	-0.676	-0.787246	-0.714054	-0.5761	-0.566675	-0.321153	-0.22278	-0.443534	0.0296828	0.260372	0.110668	0.0316834	0.108608	0.317418
8825	LIN7A	-0.496467	0.104958	-4.73014	2.24e-06	0.000658213	0	0.826115	0.975338	-2.98644	-1.0749	-1.21204	-3.24645	-0.940342	-0.483104	-0.506854	-0.547425	-0.399311	-0.586374	-0.310776	-0.270855	0.0288044	0.259365	0.108541	0.0326236	0.109225	0.314334
7528	YY1	0.585961	0.124512	4.70607	2.53e-06	0.000709957	17.124	6.03311	0.30301	3.86513	1.27285	0.0565748	4.63105	1.05096	0.587985	0.663177	0.653177	0.0184582	0.855688	0.347845	0.330123	0.0294395	0.263332	0.106447	0.0341407	0.109547	0.315225
2030	SLC29A1	0.491208	0.105105	4.67348	2.96e-06	0.000807303	0	4.33498	0.502261	3.73607	0.147487	0.0969598	2.87308	1.05252	1.68067	0.639884	0.0737685	0.0316356	0.516537	0.34837	0.97456	0.0293341	0.25017	0.106456	0.0323228	0.109551	0.336244
8714	ABCC3	-0.484222	0.104882	-4.61684	3.9e-06	0.00103089	0	1.25043	0.939948	-2.57816	-0.997234	-0.62622	-3.20381	-1.70946	-1.15995	-0.435792	-0.50655	-0.204837	-0.578349	-0.572788	-0.659619	0.0285718	0.258019	0.106995	0.0325871	0.112271	0.323377
1633	DCK	0.484268	0.105126	4.60655	4.09e-06	0.00105231	0	4.27696	0.510268	3.31307	0.746927	0.216132	3.67993	0.360931	0.493953	0.564375	0.376762	0.0705358	0.668773	0.118691	0.276974	0.0290184	0.254436	0.106508	0.0330276	0.10814	0.314418
55701	ARHGEF40	-0.482316	0.104949	-4.59572	4.31e-06	0.00107767	0	2.06975	0.839412	-2.55185	-1.81147	-2.21217	-2.7298	-0.72736	-0.722791	-0.431242	-0.956078	-0.746156	-0.489985	-0.239821	-0.406717	0.0285581	0.278565	0.113768	0.0322184	0.108711	0.316635
26073	POLDIP2	0.49366	0.108062	4.56829	4.92e-06	0.00119554	2.68504	5.13796	0.399277	3.62865	1.38395	0.732116	3.43402	0.127098	-0.306619	0.620591	0.713665	0.239704	0.621843	0.0417644	-0.171607	0.0292497	0.265916	0.107199	0.0327911	0.107977	0.313236
9846	GAB2	-0.478685	0.104973	-4.5601	5.11e-06	0.00121043	0	3.05146	0.692052	-2.79454	0.535915	-0.95233	-3.13382	-1.92365	-1.14942	-0.473345	0.269168	-0.312573	-0.565204	-0.648016	-0.653425	0.0286904	0.252264	0.107728	0.0325284	0.11348	0.323174
6518	SLC2A5	-0.474388	0.104936	-4.52074	6.16e-06	0.00142142	0	2.48979	0.778032	-2.15893	-0.722466	-2.50951	-3.22297	-0.894512	-0.5086	-0.363647	-0.364216	-0.854929	-0.581953	-0.295464	-0.28524	0.0283715	0.254145	0.11606	0.0326035	0.109103	0.314534
3042	HBM	0.473518	0.105107	4.50511	6.63e-06	0.00149192	0	4.85652	0.433641	2.50369	-0.0754225	1.51917	4.04709	0.427585	0.0938182	0.422919	-0.0377146	0.503338	0.739839	0.140659	0.0524517	0.0285334	0.250044	0.109776	0.0334187	0.108215	0.312569
6423	SFRP2	-0.472277	0.105088	-4.49409	6.99e-06	0.00153299	0	4.9094	0.427037	-2.94108	-0.967765	-0.331263	-2.6239	-2.9078	0.264285	-0.498915	-0.491123	-0.108155	-0.470441	-1.01344	0.147869	0.0287767	0.257538	0.106596	0.0321451	0.121468	0.313047
9040	UBE2M	0.563024	0.125956	4.47001	7.82e-06	0.00167534	18.5602	6.13951	0.29288	4.99469	1.37437	0.380685	3.03502	1.10874	0.095642	0.873136	0.708413	0.124319	0.546708	0.367274	0.0534716	0.0305595	0.265683	0.106646	0.0324481	0.109729	0.312571
64581	CLEC7A	-0.467903	0.105055	-4.45387	8.43e-06	0.00176439	0	4.64628	0.460554	-3.13156	-1.40154	-2.01174	-2.92837	0.208951	0.214738	-0.532332	-0.723322	-0.674548	-0.52682	0.0686736	0.120111	0.0288963	0.26635	0.11243	0.0323647	0.108017	0.312861
51296	SLC15A3	-0.464725	0.104834	-4.43297	9.29e-06	0.00190023	0	2.11722	0.832699	-2.39387	0.233891	-1.6236	-2.86027	-2.08236	-0.910879	-0.403983	0.117046	-0.539142	-0.514159	-0.704584	-0.514561	0.0284791	0.250428	0.110267	0.0323132	0.114487	0.319119
54502	RBM47	-0.464225	0.104889	-4.42588	9.61e-06	0.00192017	0	3.21309	0.667171	-3.74183	-0.340766	-0.835933	-1.6307	-1.93585	-1.25643	-0.640921	-0.170693	-0.27399	-0.28992	-0.652336	-0.716647	0.0293387	0.250911	0.10743	0.0316089	0.113554	0.32534
2357	FPR1	-0.460816	0.104732	-4.39997	1.08e-05	0.00211732	0	1.23628	0.94135	-1.94887	-0.814883	-1.63632	-3.09364	-1.4849	-1.29644	-0.327767	-0.411736	-0.543517	-0.557675	-0.495121	-0.740455	0.0282854	0.255298	0.11033	0.0324954	0.11118	0.326207
29116	MYLIP	-0.458698	0.104827	-4.37578	1.21e-05	0.00223476	0	2.19827	0.821086	-2.94865	-1.06046	-0.427997	-2.75848	-1.93112	0.0704159	-0.50024	-0.539801	-0.139805	-0.49529	-0.650662	0.0393661	0.0287813	0.259106	0.1067	0.0322388	0.113525	0.312539
79042	TSEN34	-0.458273	0.104761	-4.37448	1.22e-05	0.00223476	0	1.55147	0.907055	-2.45474	-0.341531	-1.44051	-3.32899	-0.684131	-0.959105	-0.414472	-0.171078	-0.476524	-0.601948	-0.225477	-0.54243	0.0285089	0.250915	0.10943	0.0326959	0.108623	0.319856
5443	POMC	0.662976	0.151262	4.38295	1.17e-05	0.00223476	37.0118	7.938	0.159686	4.42272	1.89743	2.35135	2.63303	0.414399	2.88922	0.765351	1.00706	0.796666	0.472123	0.136311	1.81565	0.0299463	0.281693	0.114794	0.0321512	0.108199	0.394915
7903	ST8SIA4	-0.456913	0.105003	-4.35144	1.35e-05	0.00243333	0	4.79397	0.441539	-3.21427	-0.574908	-0.393248	-3.56911	-0.326723	0.258947	-0.546907	-0.28895	-0.12843	-0.64756	-0.107425	0.144877	0.028951	0.252609	0.10666	0.0329186	0.108106	0.313025
11326	VSIG4	-0.586879	0.135054	-4.34552	1.39e-05	0.0024509	25.7271	6.73193	0.241353	-1.56897	-0.457443	-2.2184	-4.51046	-2.44213	-1.1909	-0.263255	-0.229473	-0.748402	-0.831454	-0.835864	-0.677861	0.028153	0.251646	0.113812	0.033981	0.117148	0.323987
55122	AKIRIN2	-0.454503	0.104791	-4.33724	1.44e-05	0.00246579	0	2.04651	0.842672	-2.89186	-1.66591	-1.39369	-2.03611	-1.90413	0.079148	-0.490314	-0.871606	-0.460623	-0.363065	-0.641109	0.0442485	0.0287471	0.273741	0.109234	0.0317955	0.113363	0.312549
118812	MORN4	0.454723	0.104878	4.33574	1.45e-05	0.00246579	0	3.26511	0.659187	3.49859	1.54096	0.522876	2.28387	1.36072	-0.328621	0.597342	0.800762	0.170899	0.408111	0.452632	-0.183953	0.0291513	0.270038	0.106827	0.0319312	0.11065	0.313346
150372	NFAM1	-0.450892	0.104732	-4.3052	1.67e-05	0.0027794	0	1.50971	0.911947	-2.78413	-0.646259	-0.938758	-2.6005	-2.05672	0.0377971	-0.471533	-0.325259	-0.308066	-0.46613	-0.695395	0.0211296	0.0286844	0.253306	0.107691	0.0321293	0.114317	0.312511
81609	SNX27	-0.450426	0.10477	-4.29918	1.71e-05	0.00280399	0	2.32714	0.802273	-2.27295	-0.878471	-0.811954	-2.57353	-2.66178	-0.710427	-0.383194	-0.444629	-0.266061	-0.461167	-0.918422	-0.39967	0.0284222	0.256178	0.107374	0.0321113	0.119053	0.316493
440503	PLIN5	-0.473367	0.110859	-4.27	1.95e-05	0.00314012	5.43294	5.28725	0.381838	-3.06214	0.995959	-0.588102	-3.14538	-1.94827	-1.26642	-0.520128	0.505882	-0.192309	-0.567372	-0.656741	-0.722586	0.0288517	0.257997	0.106929	0.032538	0.11363	0.325553
5329	PLAUR	-0.4464	0.104739	-4.26203	2.03e-05	0.00319722	0	2.07682	0.838417	-1.77336	-0.447743	-1.34467	-3.41438	-1.7442	-0.622902	-0.297907	-0.224576	-0.444019	-0.618117	-0.58491	-0.349914	0.0282205	0.251576	0.109037	0.032773	0.112456	0.315561
10116	FEM1B	-0.444943	0.10479	-4.24602	2.18e-05	0.003375	0	2.77126	0.735199	-3.34619	-0.965902	-1.675	-2.39808	-0.283471	0.182403	-0.570243	-0.490149	-0.556852	-0.428977	-0.0931877	0.102009	0.0290415	0.257508	0.110523	0.0319994	0.108069	0.31276
2867	FFAR2	-0.44384	0.104776	-4.23609	2.27e-05	0.00346791	0	2.9823	0.702715	-3.60389	-0.0109322	-0.322701	-2.19655	-1.46106	-0.935407	-0.616155	-0.00546609	-0.105355	-0.392202	-0.486941	-0.528723	0.0292306	0.250001	0.106589	0.0318814	0.111074	0.319489
126364	LRRC25	-0.443287	0.104844	-4.22806	2.36e-05	0.00353421	0	3.72472	0.58969	-2.31921	0.529555	-1.79811	-3.04059	-1.8587	0.0940423	-0.391141	0.265946	-0.599535	-0.54775	-0.625074	0.052577	0.0284436	0.25221	0.111172	0.0324525	0.113096	0.312569
5611	DNAJC3	-0.442037	0.104713	-4.2214	2.43e-05	0.0035806	0	2.12761	0.831221	-2.73371	-0.0387459	-1.66668	-2.0081	-2.30741	-0.581944	-0.462765	-0.0193734	-0.553983	-0.35799	-0.786171	-0.326703	0.028656	0.250012	0.110481	0.0317812	0.116087	0.315168
11031	RAB31	-0.44088	0.104737	-4.2094	2.56e-05	0.00370546	0	2.47241	0.780645	-2.80023	-1.29679	-0.268918	-2.30748	-2.25506	-0.431804	-0.474336	-0.666134	-0.0877776	-0.412419	-0.767039	-0.24195	0.0286936	0.263867	0.106544	0.031945	0.115696	0.313963
91662	NLRP12	-0.439475	0.104741	-4.19585	2.72e-05	0.00370546	0	3.29598	0.654458	-2.60778	-0.990096	-0.0478156	-2.35054	-2.36365	-1.41637	-0.440919	-0.502809	-0.0156003	-0.420284	-0.806834	-0.81241	0.0285874	0.257901	0.106446	0.0319705	0.11652	0.329
1362	CPD	-0.439379	0.104654	-4.19841	2.69e-05	0.00370546	0	2.18876	0.822458	-1.75933	-1.04378	-0.930782	-2.97476	-1.84126	-1.589	-0.295523	-0.531009	-0.305418	-0.535462	-0.618934	-0.917712	0.0282156	0.258812	0.10767	0.0324005	0.112995	0.333555
51259	TMEM216	-0.439376	0.104698	-4.19661	2.71e-05	0.00370546	0	1.89297	0.863748	-2.04569	-0.86332	-1.92443	-3.12606	-1.04801	0.0181805	-0.344284	-0.436777	-0.643736	-0.563749	-0.346855	0.0101633	0.028324	0.255962	0.111895	0.032522	0.109538	0.312503
57092	PCNP	0.440133	0.104815	4.19914	2.68e-05	0.00370546	0	3.49546	0.624074	3.57024	0.251679	0.744331	2.74126	0.470024	-0.169814	0.610135	0.125964	0.243732	0.492103	0.154658	-0.0949629	0.029205	0.250496	0.107224	0.0322265	0.108269	0.312725
7411	VBP1	0.521075	0.1245	4.18533	2.85e-05	0.00382329	17.4783	6.05901	0.300519	4.50388	1.02693	2.17792	2.48783	0.161045	-0.185809	0.780451	0.522142	0.733826	0.445424	0.0529227	-0.103915	0.0300273	0.25852	0.113528	0.0320556	0.107991	0.31277
7132	TNFRSF1A	-0.435474	0.104683	-4.15994	3.18e-05	0.00421128	0	2.17796	0.824013	-2.53153	0.206275	-0.756197	-3.23285	-1.20046	-0.753419	-0.427728	0.103206	-0.247647	-0.583813	-0.398222	-0.424194	0.0285476	0.250333	0.10725	0.0326119	0.110041	0.316999
5990	RFX2	-0.435109	0.104833	-4.15048	3.32e-05	0.00426691	0	4.39502	0.494051	-1.67681	-0.576657	-2.69822	-2.26193	-2.41825	-0.48235	-0.281523	-0.289839	-0.925767	-0.404111	-0.827004	-0.270429	0.0281876	0.252625	0.117719	0.0319185	0.116954	0.314328
10610	ST6GALNAC2	-0.434318	0.104647	-4.15032	3.32e-05	0.00426691	0	1.74843	0.882743	-2.67698	-1.29097	-0.143425	-2.7385	-1.45318	-0.71346	-0.452913	-0.662978	-0.0467996	-0.491594	-0.484238	-0.401398	0.0286246	0.263736	0.106471	0.0322246	0.11104	0.316528
4689	NCF4	-0.433988	0.104677	-4.14599	3.38e-05	0.00428701	0	2.40319	0.790999	-2.91949	0.573187	-1.46343	-2.55345	-1.00266	-1.03605	-0.495141	0.288076	-0.484326	-0.457475	-0.331638	-0.5871	0.0287637	0.252593	0.109529	0.0320981	0.109402	0.321117
8609	KLF7	-0.432977	0.104704	-4.13525	3.55e-05	0.00443019	0	4.38098	0.495964	-2.78036	-0.773594	-0.211542	-1.99452	-1.99996	-2.26487	-0.470878	-0.390465	-0.0690371	-0.355531	-0.675122	-1.35604	0.0286823	0.254764	0.106505	0.0317743	0.113952	0.358471
27202	C5AR2	-0.431475	0.104635	-4.12364	3.73e-05	0.00453363	0	1.79504	0.876715	-2.87017	0.195322	-0.712965	-2.59953	-1.68195	-0.654642	-0.486529	0.0977194	-0.233391	-0.465953	-0.56321	-0.367932	0.0287343	0.250298	0.107159	0.0321286	0.112128	0.315884
55332	DRAM1	-0.431367	0.104578	-4.12482	3.71e-05	0.00453363	0	1.11658	0.952626	-3.11052	-0.413895	-0.582803	-2.40451	-1.1487	-0.918287	-0.528631	-0.207503	-0.190569	-0.430154	-0.38074	-0.518836	0.0288827	0.251346	0.10692	0.0320033	0.109862	0.31923
10226	PLIN3	-0.531437	0.129428	-4.10604	4.02e-05	0.00458334	21.2611	6.35011	0.273627	-2.82912	-1.45567	-0.264102	-2.86425	-3.48743	-0.510515	-0.479369	-0.753199	-0.0862043	-0.514898	-1.25024	-0.286321	0.0287103	0.267728	0.10654	0.0323162	0.128522	0.314549
84898	PLXDC2	-0.430751	0.104632	-4.1168	3.84e-05	0.00458334	0	1.7325	0.884781	-2.57282	-0.756727	-0.218535	-3.06568	-1.32392	-0.538144	-0.434868	-0.381795	-0.0713205	-0.552441	-0.440099	-0.301927	0.028569	0.254555	0.10651	0.0324727	0.110503	0.314779
2885	GRB2	-0.430497	0.104665	-4.1131	3.9e-05	0.00458334	0	2.26569	0.811293	-2.35046	0.481078	-1.39942	-2.99402	-1.46591	-0.596467	-0.396513	0.241414	-0.462566	-0.539053	-0.488603	-0.334928	0.0284583	0.251821	0.109258	0.0324156	0.111096	0.315304
5552	SRGN	-0.430434	0.104685	-4.11172	3.93e-05	0.00458334	0	3.15409	0.676243	-2.08956	-0.760126	-1.30899	-3.34913	-0.101636	-1.47506	-0.35178	-0.383542	-0.431962	-0.605756	-0.0333963	-0.847968	0.0283421	0.254597	0.108898	0.0327139	0.107969	0.330476
10409	BASP1	-0.430413	0.104793	-4.10728	4e-05	0.00458334	0	4.58393	0.468733	-2.99269	0.185386	0.282988	-3.00961	-1.24973	-1.32793	-0.50795	0.0927427	0.092375	-0.541963	-0.414901	-0.759263	0.0288083	0.250269	0.106555	0.0324279	0.11022	0.326912
51088	KLHL5	-0.427218	0.104792	-4.07681	4.57e-05	0.00488973	0	4.35146	0.5	-2.32832	-1.26451	-2.10993	-2.97529	0.447333	-0.668966	-0.392706	-0.648668	-0.709468	-0.535561	0.147172	-0.376073	0.0284479	0.263149	0.113066	0.032401	0.10824	0.316036
9535	GMFG	-0.427124	0.104627	-4.08236	4.46e-05	0.00488973	0	1.99336	0.850063	-3.2725	-0.506235	-0.795556	-2.54485	-0.297224	-0.704227	-0.557195	-0.254137	-0.260642	-0.455894	-0.0977141	-0.396138	0.0289904	0.252018	0.107336	0.0320924	0.10808	0.316423
728	C5AR1	-0.427039	0.104722	-4.07785	4.55e-05	0.00488973	0	3.49088	0.624767	-1.56219	0.089401	-2.03791	-3.37095	-1.17563	-0.879105	-0.262108	0.0447061	-0.683826	-0.609886	-0.38983	-0.496252	0.0281509	0.250062	0.112595	0.0327335	0.109954	0.318657
1536	CYBB	-0.426788	0.10456	-4.08176	4.47e-05	0.00488973	0	1.01236	0.961562	-2.75345	-0.127473	-1.7827	-2.15705	-1.43132	-0.442526	-0.466196	-0.0637525	-0.594173	-0.385018	-0.476751	-0.247987	0.028667	0.250127	0.111088	0.0318596	0.110945	0.314037
58484	NLRC4	-0.426667	0.104599	-4.07906	4.52e-05	0.00488973	0	1.97092	0.853154	-2.77788	-0.126352	-0.695279	-2.12816	-2.17039	-1.07425	-0.470445	-0.0631917	-0.227563	-0.379767	-0.736297	-0.609381	0.0286809	0.250125	0.107124	0.0318439	0.115088	0.321784
116362	RBP7	-0.426207	0.104786	-4.06742	4.75e-05	0.00503109	0	4.18844	0.522616	-3.22235	-0.949306	-0.202995	-3.02226	-0.397757	0.337853	-0.548333	-0.481481	-0.0662463	-0.544326	-0.130825	0.189136	0.0289564	0.257244	0.1065	0.0324379	0.10818	0.313394
9802	DAZAP2	-0.460821	0.113446	-4.06202	4.86e-05	0.005089	7.90564	5.42921	0.36577	-2.12241	-0.189467	-0.0104164	-3.90364	-2.16616	-0.749637	-0.357397	-0.0947868	-0.00339841	-0.711924	-0.734768	-0.422035	0.0283559	0.250281	0.106443	0.0332604	0.115058	0.316953
23258	DENND5A	-0.424251	0.104574	-4.05695	4.97e-05	0.00514088	0	1.38489	0.925959	-1.84141	-0.451398	-1.69153	-3.01124	-1.46777	-0.407415	-0.309472	-0.226421	-0.562563	-0.542268	-0.48924	-0.228226	0.0282449	0.251602	0.110607	0.0324292	0.111104	0.313802
4332	MNDA	-0.423754	0.104623	-4.0503	5.12e-05	0.00519913	0	2.06671	0.83984	-2.8318	-0.665792	-0.129637	-2.92557	-1.1624	-0.286918	-0.479836	-0.335226	-0.0422995	-0.526299	-0.385363	-0.160558	0.0287118	0.253512	0.106466	0.0323625	0.109909	0.313144
54823	SWT1	-0.423465	0.104644	-4.04673	5.19e-05	0.00519913	0	2.67832	0.749432	-3.40724	-1.64173	-0.970914	-1.49395	-0.83211	-0.939569	-0.581081	-0.857785	-0.318749	-0.265384	-0.274656	-0.531129	0.0290848	0.272994	0.107779	0.0315557	0.108947	0.319552
3614	IMPDH1	-0.422428	0.104463	-4.0438	5.26e-05	0.00519913	0	0.0257133	0.999994	-2.53344	-0.877615	-1.1656	-2.38205	-1.30837	-0.666954	-0.428059	-0.444186	-0.383729	-0.426045	-0.434809	-0.374929	0.0285486	0.256166	0.10838	0.0319896	0.110442	0.316014
126328	NDUFA11	0.423189	0.10463	4.04463	5.24e-05	0.00519913	0	2.52913	0.772103	3.41192	0.736281	0.0748413	2.034	1.28334	0.956636	0.581911	0.371299	0.0244183	0.362681	0.426303	0.541001	0.0290882	0.254308	0.10645	0.0317944	0.110346	0.319817
4580	MTX1	-0.421054	0.104684	-4.02213	5.77e-05	0.0056395	0	3.25706	0.660421	-2.81402	0.199468	-0.196562	-2.64001	-2.06962	-0.429522	-0.476739	0.0997959	-0.0641458	-0.473409	-0.700015	-0.240666	0.0287016	0.250311	0.106497	0.032156	0.114402	0.313948
3684	ITGAM	-0.419492	0.104526	-4.0133	5.99e-05	0.00579188	0	1.92526	0.859387	-2.12724	-0.637123	-0.495714	-2.69753	-1.73344	-1.60422	-0.358223	-0.320601	-0.161991	-0.484023	-0.581152	-0.927105	0.028358	0.253212	0.106788	0.0321957	0.112398	0.333988
84649	DGAT2	-0.415951	0.104687	-3.97329	7.09e-05	0.00660324	0	4.45127	0.48643	-2.74194	-0.34204	0.481061	-2.61455	-1.76985	-1.5503	-0.464196	-0.171334	0.157188	-0.468717	-0.593878	-0.893917	0.0286606	0.250917	0.106768	0.0321387	0.112595	0.332477
133	ADM	-0.415697	0.104633	-3.97292	7.1e-05	0.00660324	0	3.15531	0.676056	-2.70339	-1.96549	-0.0576851	-2.09679	-1.55465	-0.975257	-0.457497	-1.04804	-0.0188205	-0.37407	-0.519124	-0.551785	0.0286391	0.284325	0.106447	0.0318271	0.1115	0.320112
6923	ELOB	0.415488	0.104598	3.97224	7.12e-05	0.00660324	0	2.34568	0.799535	2.37565	0.143194	0.407149	3.27029	1.22233	0.324876	0.400846	0.0716198	0.13298	0.590867	0.405622	0.181851	0.0284703	0.25016	0.106675	0.0326443	0.110119	0.313327
9200	HACD1	0.416732	0.104748	3.97841	6.94e-05	0.00660324	0	4.35727	0.499204	1.66101	1.05371	0.321009	3.79531	1.34214	0.0838023	0.278844	0.536241	0.104802	0.690971	0.446299	0.046851	0.0281824	0.258986	0.106587	0.0331455	0.110575	0.312555
23233	EXOC6B	-0.414691	0.104539	-3.96686	7.28e-05	0.00668515	0	1.67551	0.891971	-3.2291	-1.01466	-0.624452	-1.66636	-1.57838	-0.544853	-0.549526	-0.515694	-0.204255	-0.296329	-0.527313	-0.305719	0.0289609	0.258311	0.106992	0.0316236	0.111613	0.314837
10673	TNFSF13B	-0.414786	0.104703	-3.96156	7.45e-05	0.00676618	0	4.01464	0.54731	-3.21733	-0.877885	-2.52502	-1.27751	-0.532227	-0.543754	-0.547448	-0.444326	-0.860696	-0.226667	-0.175198	-0.305097	0.028953	0.25617	0.11619	0.0314812	0.108358	0.314827
56907	SPIRE1	-0.41246	0.104693	-3.93972	8.16e-05	0.00733857	0	4.12844	0.531076	-2.27465	-2.48673	-1.75505	-2.08778	-0.40318	-0.830922	-0.383486	-1.38429	-0.584564	-0.372435	-0.132613	-0.468561	0.028423	0.309883	0.110939	0.0318224	0.108186	0.317989
11025	LILRB3	-0.467619	0.119689	-3.90697	9.35e-05	0.00816298	13.4069	5.77413	0.328821	-2.0458	0.0156417	-0.74417	-2.83449	-3.18674	-1.40748	-0.344303	0.00782087	-0.243679	-0.509373	-1.1249	-0.807043	0.028324	0.250002	0.107224	0.0322941	0.124604	0.328783
89857	KLHL6	-0.460394	0.117745	-3.91009	9.23e-05	0.00816298	11.6103	5.65677	0.341061	-2.66472	-2.61521	-1.74761	-1.214	-1.94307	-1.08151	-0.450787	-1.47466	-0.581983	-0.215332	-0.654897	-0.613623	0.028618	0.317957	0.110899	0.0314617	0.113598	0.321913
307	ANXA4	-0.437401	0.111949	-3.90713	9.34e-05	0.00816298	6.60954	5.35387	0.374236	-2.39337	-1.47711	0.271294	-3.43902	-1.80133	0.22959	-0.403897	-0.765099	0.0885539	-0.622791	-0.604907	0.128429	0.0284788	0.268293	0.106546	0.0327957	0.112769	0.312912
80301	PLEKHO2	-0.407893	0.104497	-3.9034	9.49e-05	0.00820472	0	1.52934	0.90966	-2.92835	0.161538	-1.18278	-2.05881	-1.54909	-0.356584	-0.49669	0.0808018	-0.389489	-0.367181	-0.517207	-0.199654	0.028769	0.250204	0.108439	0.0318072	0.111474	0.313497
100113407	TMEM170B	-0.407151	0.104569	-3.8936	9.88e-05	0.00846211	0	2.65102	0.753599	-2.02977	-0.837493	-2.12316	-2.64289	-1.11491	0.5041	-0.341565	-0.423412	-0.714196	-0.473939	-0.369352	0.2827	0.0283175	0.255602	0.113154	0.032158	0.10975	0.314498
22918	CD93	-0.40657	0.104553	-3.88866	0.000100801	0.00847478	0	2.62157	0.758085	-2.04437	0.257782	-0.696031	-2.89221	-2.00143	-0.80143	-0.344058	0.129025	-0.227811	-0.520093	-0.675645	-0.451654	0.0283234	0.25052	0.107125	0.0323372	0.113961	0.3176
9926	LPGAT1	-0.406225	0.104434	-3.88978	0.000100336	0.00847478	0	0.702948	0.982807	-2.70274	-0.851361	-1.68041	-1.90715	-1.13676	-0.224626	-0.457385	-0.430585	-0.55872	-0.339727	-0.376717	-0.125649	0.0286388	0.255794	0.11055	0.0317314	0.109822	0.312895
23095	KIF1B	-0.405226	0.104575	-3.87498	0.000106635	0.00880084	0	3.85356	0.570687	-3.17523	-0.0554824	-1.51391	-1.08298	-1.55756	-1.7009	-0.540023	-0.0277425	-0.501541	-0.191979	-0.520126	-0.987205	0.028925	0.250024	0.109752	0.0314245	0.111514	0.336864
64324	NSD1	0.404972	0.104483	3.87596	0.000106204	0.00880084	0	1.46634	0.916921	2.60923	1.17417	0.831377	2.71509	0.3742	0.315857	0.44117	0.600158	0.272483	0.487265	0.123062	0.17679	0.0285882	0.261256	0.10742	0.032208	0.108154	0.313281
1796	DOK1	-0.404942	0.104624	-3.87047	0.000108626	0.00888365	0	3.50914	0.622005	-2.78479	-0.0784957	-0.371037	-3.21722	-0.214721	-0.440647	-0.471648	-0.0392516	-0.121163	-0.580872	-0.0705709	-0.246929	0.0286848	0.250048	0.106636	0.0325986	0.10802	0.314024
79663	HSPBAP1	-0.403965	0.104514	-3.86517	0.000111013	0.00899704	0	2.40472	0.790772	-1.5537	-0.915875	-0.556489	-3.23649	-1.45872	-1.08583	-0.260671	-0.46406	-0.181929	-0.584498	-0.486138	-0.616148	0.0281483	0.25673	0.106878	0.0326151	0.111064	0.321991
4753	NELL2	0.403876	0.104661	3.8589	0.000113899	0.0091485	0	4.30177	0.506836	3.8075	0.0845738	0.816619	1.09892	1.5356	0.675351	0.65276	0.0422916	0.267603	0.194818	0.512559	0.379704	0.0293919	0.250056	0.107385	0.0314288	0.111411	0.316104
1387	CREBBP	-0.403302	0.10458	-3.85639	0.000115072	0.00916092	0	3.25523	0.660702	-2.51654	0.595393	-0.855252	-2.25354	-2.25548	-0.736517	-0.425139	0.299359	-0.280383	-0.402582	-0.76719	-0.414546	0.02854	0.2528	0.107477	0.0319136	0.115699	0.316796
122953	JDP2	-0.405531	0.105554	-3.84193	0.000122069	0.00946669	0.787441	5.03968	0.411056	-2.83771	0.789779	-1.85371	-2.53712	-1.07873	0.619808	-0.480866	0.398795	-0.618937	-0.454473	-0.357178	0.348159	0.0287153	0.25497	0.111483	0.0320874	0.109633	0.31553
116844	LRG1	-0.402326	0.104615	-3.84576	0.00012018	0.00946669	0	4.15149	0.527818	-2.94013	0.318048	0.135707	-2.29433	-1.83723	-1.24019	-0.49875	0.159276	0.0442804	-0.410019	-0.617516	-0.707012	0.0287761	0.250793	0.106468	0.0319372	0.112972	0.324997
1475	CSTA	-0.402221	0.104658	-3.8432	0.00012144	0.00946669	0	4.13337	0.530378	-2.97553	-0.806659	0.117016	-3.03832	-0.388589	0.0551256	-0.504944	-0.407494	0.0381806	-0.547325	-0.127804	0.0308173	0.0287977	0.255189	0.106462	0.0324507	0.108169	0.312524
4783	NFIL3	-0.400506	0.104417	-3.83565	0.000125235	0.00962916	0	1.2549	0.939503	-2.12573	-0.78992	-0.622151	-2.92684	-0.79794	-1.11096	-0.357964	-0.398868	-0.203499	-0.526534	-0.26328	-0.630854	0.0283573	0.254972	0.106987	0.0323635	0.108867	0.322449
90693	CCDC126	-0.399534	0.104465	-3.82457	0.000130999	0.00973936	0	1.73035	0.885054	-2.40284	-0.963109	-0.367927	-2.95842	-0.565885	-0.669797	-0.405528	-0.488689	-0.120145	-0.532416	-0.186323	-0.376545	0.0284834	0.257463	0.106633	0.0323878	0.108411	0.316045
90780	PYGO2	0.39975	0.104496	3.82552	0.000130494	0.00973936	0	2.58021	0.76437	3.22647	-0.153468	1.21148	1.86195	0.538171	1.24782	0.54906	-0.0767621	0.399125	0.331563	0.177162	0.711537	0.0289591	0.250184	0.108539	0.03171	0.108368	0.325157
51727	CMPK1	0.399934	0.104444	3.82919	0.000128567	0.00973936	0	1.26619	0.938372	2.99446	0.920446	0.662912	2.26558	0.711924	0.188981	0.508259	0.466439	0.216907	0.404777	0.234697	0.105691	0.0288094	0.256799	0.107062	0.0319206	0.108679	0.312779
4946	OAZ1	0.400372	0.104578	3.82845	0.000128953	0.00973936	0	3.34301	0.647264	3.02907	0.476933	0.709694	2.72654	-0.29139	0.758088	0.514326	0.239319	0.232313	0.489383	-0.0957938	0.426862	0.0288309	0.25179	0.107153	0.0322161	0.108075	0.317055
51465	UBE2J1	-0.399607	0.104649	-3.81854	0.000134246	0.00989899	0	4.61294	0.464916	-3.46592	0.169996	-1.93456	-0.915899	-1.29259	-0.948927	-0.591519	0.0850363	-0.647301	-0.162255	-0.429445	-0.53654	0.0291273	0.250226	0.111956	0.0313834	0.110381	0.319697
51311	TLR8	-0.398308	0.104495	-3.81175	0.000137988	0.0100922	0	2.59762	0.761727	-1.74271	-0.589353	-1.70057	-1.93023	-2.47819	-0.99171	-0.292702	-0.296289	-0.565687	-0.343898	-0.849284	-0.561327	0.0282099	0.252743	0.110653	0.0317425	0.117445	0.320377
2150	F2RL1	-0.42828	0.112618	-3.80295	0.000142981	0.0103731	7.35014	5.39666	0.36941	-1.87603	-0.194643	0.0925632	-3.48013	-1.9502	-1.64783	-0.31536	-0.0973791	0.0302009	-0.630604	-0.657428	-0.954117	0.0282577	0.250296	0.106455	0.0328339	0.113642	0.335258
57136	APMAP	-0.395255	0.104401	-3.78591	0.000153145	0.010938	0	1.91248	0.861118	-2.16614	0.19686	-1.08867	-2.42371	-1.39923	-1.58028	-0.364882	0.0984897	-0.357988	-0.433669	-0.465777	-0.912343	0.0283747	0.250303	0.108129	0.0320152	0.110809	0.333309
2717	GLA	-0.395135	0.104425	-3.78391	0.000154383	0.010938	0	1.73903	0.883947	-2.92811	-1.13399	-0.376311	-1.64039	-1.53297	-1.00737	-0.496648	-0.578744	-0.122888	-0.291661	-0.51165	-0.570417	0.0287688	0.260467	0.106641	0.0316128	0.111399	0.320634
10308	ZNF267	-0.395016	0.104395	-3.78386	0.000154416	0.010938	0	0.970754	0.96489	-2.35039	-0.626645	-1.60508	-2.53781	-0.450298	-0.389613	-0.396501	-0.315263	-0.532773	-0.4546	-0.14815	-0.218215	0.0284583	0.253106	0.110177	0.0320878	0.108243	0.31369
79887	PLBD1	-0.394539	0.104462	-3.77687	0.00015881	0.0111614	0	2.1019	0.834874	-2.4988	-0.0829862	-0.167383	-2.88886	-1.10025	-0.729161	-0.422074	-0.0414975	-0.0546196	-0.519471	-0.364418	-0.41035	0.028531	0.250054	0.106482	0.0323346	0.109702	0.31671
192670	AGO4	-0.394223	0.104592	-3.76913	0.000163816	0.0114239	0	3.96368	0.554657	-2.77664	0.212982	0.307376	-2.72043	-1.60252	-0.592995	-0.47023	0.106567	0.100345	-0.488253	-0.535659	-0.332961	0.0286802	0.250355	0.106575	0.0322118	0.11173	0.315272
79143	MBOAT7	-0.393482	0.104544	-3.76381	0.000167345	0.0115803	0	4.32662	0.503411	-1.4456	-0.3918	-1.0301	-2.29646	-2.65165	-1.69809	-0.242398	-0.196372	-0.338447	-0.410408	-0.914572	-0.985443	0.0281164	0.251205	0.10795	0.0319385	0.11896	0.336777
6398	SECTM1	-0.392663	0.104455	-3.75917	0.000170475	0.0116764	0	2.10719	0.834123	-2.71006	-0.369577	-1.06556	-2.30642	-1.38991	0.608872	-0.458656	-0.185184	-0.350271	-0.412226	-0.462592	0.341958	0.0286428	0.251072	0.108057	0.0319443	0.11077	0.315423
252839	TMEM9	0.393187	0.104629	3.75792	0.00017133	0.0116764	0	4.36348	0.498354	2.38615	0.424137	0.273232	3.53659	0.165127	0.0498763	0.402654	0.212667	0.0891872	0.641355	0.0542645	0.0278826	0.0284753	0.251413	0.106547	0.0328873	0.107993	0.312519
284904	SEC14L4	-0.392892	0.10469	-3.75292	0.000174784	0.0117837	0.112278	5.00562	0.415195	-2.77422	-0.46168	-0.462283	-1.21745	-2.4295	-1.89987	-0.469809	-0.231612	-0.151035	-0.215949	-0.831174	-1.11349	0.0286788	0.251676	0.106743	0.0314627	0.117045	0.343496
121355	GTSF1	-0.392077	0.104502	-3.75187	0.000175524	0.0117837	0	2.70952	0.744662	-2.43704	-0.509362	0.144996	-3.00956	-1.1748	-0.358802	-0.411421	-0.25572	0.0473123	-0.541954	-0.389551	-0.2009	0.0285001	0.252044	0.106472	0.0324279	0.109951	0.313509
6653	SORL1	-0.392287	0.104633	-3.74917	0.000177421	0.0118228	0	4.87984	0.43072	-2.21676	0.790079	-0.101373	-3.15087	-1.58939	-0.96616	-0.373555	0.39895	-0.0330757	-0.568402	-0.531118	-0.546515	0.0283969	0.254974	0.106457	0.0325426	0.111666	0.319967
9314	KLF4	-0.391947	0.104595	-3.7473	0.00017875	0.0118238	0	4.25731	0.512995	-2.48132	-0.347451	-2.27756	-2.43338	-0.507174	0.809972	-0.419057	-0.174054	-0.769802	-0.43544	-0.166922	0.456548	0.0285221	0.250947	0.11424	0.0320212	0.108321	0.317711
1608	DGKG	-0.390657	0.104463	-3.73966	0.000184269	0.0119991	0	3.11176	0.68276	-1.65006	-0.653059	-2.35081	-2.37386	-0.574116	-1.56733	-0.276987	-0.328727	-0.796469	-0.424546	-0.189045	-0.904377	0.0281788	0.253377	0.114789	0.0319846	0.108425	0.332947
143689	PIWIL4	-0.390185	0.104356	-3.73899	0.000184764	0.0119991	0	0.792309	0.977521	-1.82956	-0.776526	-1.01056	-2.64757	-1.62228	-0.399251	-0.307456	-0.391974	-0.331939	-0.474803	-0.542498	-0.223634	0.0282406	0.254801	0.107892	0.0321612	0.111827	0.31375
2876	GPX1	-0.603091	0.161384	-3.737	0.000186231	0.0119991	43.7753	8.89289	0.113414	-4.37335	-0.305161	-0.737068	-3.82944	-3.49337	0.598873	-0.756196	-0.152803	-0.241336	-0.69756	-1.25278	0.336291	0.0298979	0.25073	0.107209	0.0331813	0.128605	0.315327
2919	CXCL1	-0.389982	0.104426	-3.73453	0.000188069	0.0119991	0	2.04091	0.843456	-2.72833	-0.256962	-0.197385	-2.66409	-0.652998	-0.956559	-0.46183	-0.128614	-0.0644143	-0.477851	-0.215156	-0.540956	0.028653	0.250517	0.106497	0.0321725	0.108564	0.319816
80218	NAA50	0.39013	0.104453	3.73497	0.000187739	0.0119991	0	2.18074	0.823612	2.89816	0.893546	1.3171	2.1802	0.493282	-0.449036	0.491414	0.452453	0.434702	0.389227	0.162335	-0.251654	0.0287509	0.256397	0.108929	0.0318723	0.108301	0.314083
84674	CARD6	-0.387152	0.10442	-3.70765	0.000209194	0.0132529	0	2.09311	0.836118	-2.62572	-1.27526	-0.0825062	-1.8829	-1.78552	-0.760831	-0.444026	-0.654479	-0.0269193	-0.335345	-0.599363	-0.428429	0.028597	0.263386	0.106452	0.0317198	0.112681	0.317089
10314	LANCL1	0.385922	0.104421	3.69584	0.000219161	0.0137872	0	2.03105	0.844832	1.90724	2.01438	1.4941	2.16388	0.898946	0.521711	0.320674	1.07784	0.49478	0.386258	0.296944	0.292642	0.0282694	0.286304	0.109664	0.0318633	0.109115	0.314641
29887	SNX10	-0.385354	0.104355	-3.69273	0.000221861	0.0138601	0	1.11613	0.952666	-2.45695	-0.306935	-0.536827	-2.71409	-0.84048	-0.510594	-0.414853	-0.153694	-0.175476	-0.487081	-0.277444	-0.286365	0.02851	0.250738	0.106848	0.0322073	0.108967	0.31455
10533	ATG7	-0.384742	0.104388	-3.68569	0.000228079	0.0141504	0	1.93576	0.857961	-2.02422	-1.26947	-0.311291	-2.83892	-0.714715	-1.06953	-0.340619	-0.65135	-0.101625	-0.510195	-0.235623	-0.606623	0.0283152	0.263258	0.106578	0.0322973	0.108685	0.3217
4318	MMP9	-0.384558	0.104448	-3.6818	0.000231594	0.014249	0	3.3261	0.649849	-2.78736	0.0503323	-0.229034	-1.75674	-1.91108	-1.52283	-0.472095	0.0251672	-0.0747492	-0.312592	-0.643568	-0.877095	0.0286863	0.25002	0.106516	0.0316622	0.113404	0.331732
6645	SNTB2	-0.383635	0.104346	-3.67657	0.000236393	0.014249	0	1.35261	0.929426	-1.97145	-0.223616	-0.664107	-2.48991	-1.87886	-0.87312	-0.331615	-0.111895	-0.2173	-0.445805	-0.632182	-0.492807	0.0282942	0.250391	0.107064	0.0320569	0.113213	0.318571
135927	LLCFC1	-0.38384	0.104414	-3.67612	0.000236808	0.014249	0	2.53882	0.770637	-2.00765	-1.54338	-0.519363	-2.76102	-0.366137	-1.27003	-0.33779	-0.802119	-0.169747	-0.49576	-0.120406	-0.724728	0.0283086	0.270106	0.106822	0.0322406	0.108145	0.325631
124220	ZG16B	-0.491961	0.133846	-3.67556	0.000237324	0.014249	25.3098	6.69432	0.244385	-2.95753	-2.29153	-0.139638	-4.00209	-0.75101	-0.0607265	-0.501793	-1.25319	-0.0455635	-0.73106	-0.247676	-0.0339487	0.0287867	0.299078	0.10647	0.0333682	0.108762	0.312529
8826	IQGAP1	-0.38389	0.104452	-3.67528	0.000237588	0.014249	0	2.67097	0.750554	-2.79921	-0.501103	0.110908	-2.04714	-1.91563	-0.468295	-0.474158	-0.25154	0.0361873	-0.365063	-0.645176	-0.262505	0.028693	0.251977	0.10646	0.0318011	0.113432	0.314223
9990	SLC12A6	-0.382785	0.104414	-3.66603	0.000246345	0.0146763	0	2.54524	0.769668	-2.22017	-0.310584	0.0217238	-2.45669	-1.93335	-1.08893	-0.374139	-0.155526	0.00708753	-0.439711	-0.651453	-0.617958	0.0283984	0.250756	0.106443	0.0320358	0.113539	0.322047
10581	IFITM2	-0.382488	0.104421	-3.66294	0.000249338	0.0146764	0	2.66946	0.750786	-2.96898	0.212707	-0.352864	-2.30328	-0.652529	-1.17093	-0.503798	0.106429	-0.115218	-0.411652	-0.215001	-0.666084	0.0287937	0.250354	0.106617	0.0319425	0.108563	0.323592
211	ALAS1	-0.382005	0.104297	-3.66266	0.00024961	0.0146764	0	0.728261	0.981382	-1.6383	-0.697501	-1.3568	-2.60901	-1.24699	-0.877469	-0.274996	-0.351432	-0.448123	-0.467698	-0.413973	-0.49531	0.028175	0.25386	0.109085	0.032135	0.110209	0.318633
23135	KDM6B	-0.382027	0.104434	-3.65808	0.000254109	0.0148439	0	3.695	0.594108	-2.73702	-0.305244	-1.53013	-0.972854	-1.66481	-1.85277	-0.46334	-0.152845	-0.507086	-0.172381	-0.557254	-1.08325	0.0286578	0.25073	0.109826	0.0313966	0.11204	0.341836
10739	RFPL2	-0.670698	0.18406	-3.6439	0.000268533	0.0155853	55.865	11.3289	0.0452355	-6.54943	-1.40161	-0.747188	-2.43758	-1.86162	-1.19469	-1.1861	-0.723359	-0.244675	-0.436211	-0.626103	-0.680096	0.0327972	0.266352	0.10723	0.0320238	0.113113	0.324063
64420	SUSD1	-0.379722	0.104408	-3.63692	0.000275917	0.0159112	0	2.19322	0.821814	-2.31875	-1.02492	-1.64723	-2.49078	-0.185497	0.203918	-0.391061	-0.521083	-0.547276	-0.445964	-0.0609616	0.114053	0.0284434	0.258485	0.110384	0.0320574	0.108003	0.312825
391	RHOG	-0.378754	0.104294	-3.63159	0.000281684	0.0160382	0	0.747838	0.98024	-2.23885	-0.0882897	-1.13657	-2.17677	-1.63423	-0.463885	-0.377343	-0.0441502	-0.374004	-0.388603	-0.546641	-0.26002	0.0284068	0.250061	0.108283	0.0318704	0.111886	0.31419
7710	ZNF154	0.379694	0.104511	3.63306	0.000280083	0.0160382	0	3.68009	0.596329	1.52812	-0.0440648	1.91376	3.18231	0.858985	-0.121219	0.256344	-0.0220331	0.639984	0.574307	0.283612	-0.0677759	0.0281406	0.250015	0.111832	0.0325689	0.109013	0.312615
1991	ELANE	-0.377564	0.104474	-3.61396	0.000301552	0.0170614	0	3.30368	0.653278	-2.51289	-0.771481	0.0947839	-3.03408	-0.319712	-0.371122	-0.424508	-0.389379	0.0309256	-0.546534	-0.105117	-0.207821	0.0285381	0.254738	0.106455	0.0324473	0.1081	0.31358
4117	MAK	-0.377367	0.104488	-3.61159	0.000304327	0.0171108	0	3.99298	0.550427	-3.06959	-0.777491	0.504928	-1.75846	-1.54774	-1.12564	-0.521437	-0.39247	0.165013	-0.312902	-0.516739	-0.63946	0.0288565	0.254814	0.106801	0.031663	0.111468	0.322723
566	AZU1	-0.376944	0.104432	-3.60948	0.000306811	0.0171433	0	2.8188	0.727897	-2.22005	-1.16608	0.198051	-2.92223	-0.81106	-0.567725	-0.374119	-0.595834	0.0646318	-0.525676	-0.267646	-0.318655	0.0283984	0.261094	0.106498	0.03236	0.108897	0.315039
2820	GPD2	-0.375897	0.104301	-3.60396	0.000313409	0.0174039	0	0.985832	0.9637	-2.50404	-0.636633	-1.82119	-1.60387	-1.15348	-0.281356	-0.42298	-0.320352	-0.607578	-0.285102	-0.382353	-0.157439	0.0285336	0.253207	0.1113	0.0315981	0.109878	0.31312
3055	HCK	-0.375919	0.104365	-3.60197	0.000315816	0.01743	0	2.72039	0.742998	-2.41503	0.209418	-1.00802	-1.6088	-1.9884	-1.50341	-0.407628	0.104781	-0.331093	-0.285987	-0.671005	-0.865232	0.0284893	0.250343	0.107885	0.0316	0.113879	0.331216
140885	SIRPA	-0.375462	0.1043	-3.59982	0.000318434	0.0174673	0	1.35083	0.929616	-2.96138	-0.530062	-1.20514	-1.42444	-0.81162	-1.05768	-0.502468	-0.266202	-0.396994	-0.252935	-0.267833	-0.599705	0.028789	0.252214	0.108516	0.0315305	0.108898	0.321491
3385	ICAM3	-0.375245	0.104427	-3.59339	0.000326405	0.0176888	0	3.75978	0.584493	-2.01773	-0.326644	0.0427233	-3.01993	-0.734506	-1.68315	-0.33951	-0.163595	0.0139389	-0.54389	-0.242194	-0.976113	0.0283126	0.250836	0.106445	0.0324361	0.108726	0.33632
22938	SNW1	0.375541	0.104488	3.59409	0.000325526	0.0176888	0	3.86506	0.569003	1.00372	0.607255	1.96299	3.23663	0.649885	0.809247	0.167986	0.305392	0.657318	0.584524	0.214125	0.456132	0.0280104	0.252915	0.112128	0.0326152	0.108558	0.317701
6907	TBL1X	-0.374774	0.104376	-3.59063	0.000329877	0.0177699	0	2.09925	0.835249	-2.36573	0.427893	-0.730478	-2.63252	-1.30344	-0.222251	-0.399139	0.214561	-0.239163	-0.472029	-0.433134	-0.124319	0.0284656	0.251439	0.107195	0.0321509	0.110423	0.312886
64778	FNDC3B	-0.374223	0.104341	-3.58653	0.000335107	0.0178958	0	2.16487	0.825894	-2.4285	0.212772	-0.29717	-2.46543	-1.1821	-1.23336	-0.409948	0.106461	-0.0970098	-0.441315	-0.392016	-0.702965	0.0284959	0.250354	0.106566	0.0320413	0.109977	0.324854
112574	SNX18	-0.373699	0.104314	-3.58244	0.000340406	0.0178958	0	1.4374	0.920179	-2.27506	-1.53568	-0.760097	-1.64766	-1.75601	-0.600775	-0.383557	-0.797798	-0.248934	-0.292968	-0.589035	-0.337369	0.0284232	0.26989	0.107258	0.0316158	0.11252	0.315345
154664	ABCA13	-0.3735	0.104304	-3.58088	0.000342437	0.0178958	0	1.33605	0.931179	-2.91192	-1.00557	-0.770266	-1.81667	-0.407741	-0.780023	-0.493819	-0.510921	-0.25229	-0.323394	-0.134116	-0.439401	0.0287591	0.258158	0.10728	0.0316891	0.108191	0.317327
57533	TBC1D14	-0.373866	0.104422	-3.58036	0.000343126	0.0178958	0	3.38745	0.640481	-1.46979	0.506053	-1.16561	-2.83139	-1.68827	-1.25072	-0.246484	0.254045	-0.383733	-0.508799	-0.56541	-0.71326	0.0281233	0.252017	0.10838	0.0322918	0.112161	0.325218
5199	CFP	-0.373803	0.104427	-3.57958	0.00034415	0.0178958	0	2.88531	0.717662	-2.4294	-0.850252	0.218354	-2.64923	-1.41459	0.0814494	-0.410104	-0.430011	0.0712615	-0.475109	-0.471025	0.0455354	0.0284964	0.255778	0.106509	0.0321623	0.110874	0.312552
9702	CEP57	0.373715	0.104269	3.58416	0.000338165	0.0178958	0	1.04485	0.958868	2.53308	-0.0793959	1.02065	1.89701	1.28957	1.0793	0.427996	-0.0397018	0.3353	0.337895	0.428418	0.61233	0.0285484	0.250049	0.107922	0.0317265	0.11037	0.321874
7314	UBB	-0.373698	0.104471	-3.57703	0.000347515	0.0179669	0	3.64963	0.600877	-2.4662	-0.513645	-0.392355	-1.77598	-2.60482	0.0755026	-0.416449	-0.257888	-0.128138	-0.316058	-0.89682	0.0422102	0.0285146	0.252078	0.106659	0.0316708	0.118537	0.312545
5034	P4HB	-0.372964	0.104379	-3.57315	0.000352707	0.0180281	0	2.32633	0.802392	-2.15601	0.186013	-0.302597	-2.86602	-1.38464	-0.433502	-0.363146	0.093057	-0.0987835	-0.515227	-0.460793	-0.242906	0.0283703	0.250271	0.106571	0.0323175	0.110748	0.313975
5500	PPP1CB	0.373324	0.104459	3.57388	0.000351735	0.0180281	0	3.43663	0.632997	2.04209	1.10827	1.92714	2.62418	0.100926	-0.44773	0.343669	0.565087	0.644688	0.470492	0.0331629	-0.250918	0.0283225	0.259979	0.111911	0.0321452	0.107969	0.314074
2526	FUT4	-0.371956	0.104261	-3.56754	0.000360342	0.0183143	0	0.624425	0.986858	-2.38667	-0.697382	-1.24234	-2.2957	-0.555515	-0.216905	-0.402743	-0.351372	-0.409498	-0.410269	-0.182894	-0.121325	0.0284756	0.253858	0.108649	0.0319381	0.108395	0.312868
925	CD8A	0.37249	0.104508	3.56422	0.00036494	0.0184438	0	4.19175	0.522153	3.1342	1.98833	1.27872	0.991003	0.560998	0.432234	0.532796	1.06193	0.421751	0.175609	0.184707	0.242193	0.028898	0.28524	0.108783	0.031401	0.108403	0.313966
96459	FNIP1	-0.371361	0.104469	-3.55474	0.000378348	0.018764	0	4.15998	0.526621	-3.01044	-0.600563	0.392788	-1.54992	-1.88655	-1.12121	-0.51106	-0.301988	0.128279	-0.275418	-0.634899	-0.636866	0.0288193	0.25285	0.106659	0.0315769	0.113258	0.32264
9920	KBTBD11	-0.370866	0.104356	-3.55385	0.00037964	0.018764	0	2.08248	0.837618	-2.16236	-2.0598	-1.05046	-1.88127	-1.03809	-0.271062	-0.364234	-1.10581	-0.345233	-0.335052	-0.343524	-0.151668	0.028373	0.288213	0.108011	0.0317191	0.109507	0.313075
2358	FPR2	-0.370929	0.104378	-3.55372	0.000379824	0.018764	0	3.64265	0.601921	-2.33581	-0.0622994	0.0364341	-2.16966	-1.61941	-1.86561	-0.393993	-0.0311516	0.0118869	-0.38731	-0.541504	-1.09147	0.0284514	0.25003	0.106444	0.0318665	0.111813	0.342283
7305	TYROBP	-0.371075	0.10442	-3.55367	0.000379892	0.018764	0	2.97476	0.703877	-2.07098	-0.461768	-2.09481	-2.5832	-0.138206	0.144556	-0.348604	-0.231657	-0.704073	-0.462946	-0.0454153	0.0808305	0.0283343	0.251677	0.112965	0.0321177	0.107982	0.312663
5341	PLEK	-0.370703	0.104352	-3.55242	0.000381704	0.018764	0	2.46967	0.781056	-2.39609	0.740317	-1.0566	-2.26146	-1.15318	-1.11338	-0.404365	0.37337	-0.347283	-0.404025	-0.382252	-0.632274	0.0284801	0.254356	0.108029	0.0319182	0.109877	0.322494
64231	MS4A6A	-0.369823	0.104369	-3.54342	0.000394974	0.0192106	0	2.44128	0.785311	-1.89937	-1.52954	-1.0186	-2.32116	-1.52846	0.53711	-0.319334	-0.79436	-0.334615	-0.414917	-0.510099	0.301343	0.0282665	0.269719	0.107916	0.031953	0.111378	0.31477
23741	EID1	0.37016	0.104466	3.54336	0.000395061	0.0192106	0	4.28033	0.5098	1.52948	1.28533	0.973982	3.17399	-0.194949	1.33548	0.256575	0.659924	0.319769	0.572744	-0.0640693	0.763775	0.028141	0.263609	0.107788	0.0325619	0.108009	0.327084
79671	NLRX1	-0.369624	0.104374	-3.54133	0.000398117	0.0192334	0	2.43323	0.786516	-2.70252	-0.760816	-0.333594	-2.54288	-0.619417	0.361362	-0.457346	-0.383896	-0.108917	-0.455532	-0.204034	0.202338	0.0286387	0.254606	0.106599	0.0320911	0.108502	0.313524
88455	ANKRD13A	-0.369985	0.104509	-3.54021	0.000399806	0.0192334	0	4.59123	0.467771	-2.35212	-1.42407	0.472468	-1.88814	-2.29001	-0.728995	-0.396798	-0.735729	0.154372	-0.336292	-0.779801	-0.410255	0.0284591	0.266916	0.106756	0.0317223	0.115956	0.316708
9766	SUSD6	-0.368615	0.104364	-3.532	0.000412436	0.0197355	0	3.38302	0.641157	-2.16452	-0.393465	0.172622	-2.65874	-0.974396	-1.72335	-0.364604	-0.19721	0.05633	-0.476862	-0.32217	-1.00127	0.028374	0.251215	0.106484	0.0321688	0.10932	0.337563
57591	MKL1	-0.367866	0.104388	-3.52403	0.000425041	0.0202311	0	2.97927	0.703182	-1.90148	-0.680832	-1.77561	-2.08335	-1.81258	0.735065	-0.319693	-0.342909	-0.591704	-0.371632	-0.608854	0.413717	0.0282673	0.253675	0.111049	0.03182	0.112832	0.316779
2896	GRN	-0.426136	0.121196	-3.5161	0.000437944	0.0207355	15.0303	5.88445	0.317625	-3.20127	0.337362	-0.0798053	-2.40976	-2.68417	-0.132967	-0.544614	0.168982	-0.026038	-0.431116	-0.926955	-0.0743475	0.0289423	0.250892	0.106451	0.0320066	0.11926	0.312638
754	PTTG1IP	-0.366366	0.104324	-3.5118	0.000445085	0.0209211	0	2.38654	0.793477	-1.90153	-0.748941	-0.15946	-2.15923	-2.17241	-1.06557	-0.319703	-0.377796	-0.0520335	-0.385414	-0.737027	-0.604313	0.0282673	0.25446	0.106478	0.0318608	0.115102	0.32163
824	CAPN2	-0.366533	0.104397	-3.51095	0.000446515	0.0209211	0	3.29129	0.655176	-2.00168	-1.22289	-1.46062	-2.00674	-1.7709	0.905175	-0.336772	-0.626254	-0.483367	-0.357744	-0.594243	0.511272	0.0283062	0.262256	0.109517	0.0317805	0.112601	0.319035
162989	DEDD2	-0.366541	0.104472	-3.50851	0.000450619	0.021004	0	4.07551	0.538597	-2.01289	0.0884166	0.0974477	-2.83643	-2.06321	-0.118051	-0.338685	0.0442137	0.0317948	-0.509734	-0.69772	-0.0660038	0.0283107	0.250061	0.106456	0.0322955	0.11436	0.312609
79582	SPAG16	0.365522	0.104268	3.50559	0.000455594	0.0211264	0	1.69404	0.889649	2.37722	0.800209	0.00927924	2.06851	1.39981	1.20559	0.401117	0.404169	0.0030274	0.368939	0.465973	0.686533	0.028471	0.255105	0.106443	0.0318123	0.110812	0.324283
2591	GALNT3	-0.365287	0.104358	-3.50032	0.000464692	0.021365	0	2.90652	0.714394	-2.81196	-0.62954	0.36017	-2.15889	-0.902007	-1.11857	-0.47638	-0.316737	0.117608	-0.385352	-0.297966	-0.635318	0.0287004	0.253135	0.106625	0.0318606	0.109123	0.322591
10043	TOM1	-0.36495	0.104285	-3.49953	0.000466077	0.021365	0	1.51742	0.911051	-2.10374	0.163436	-0.984584	-2.24092	-1.80254	-0.267235	-0.354204	0.0817521	-0.323294	-0.400282	-0.605332	-0.149523	0.028348	0.250209	0.107818	0.0319064	0.112776	0.313059
5873	RAB27A	-0.368264	0.105296	-3.49742	0.000469782	0.021365	0.732341	5.03689	0.411395	-2.22969	-0.332161	0.741959	-2.54705	-2.12377	-0.919935	-0.375771	-0.166367	0.24295	-0.456297	-0.719469	-0.519787	0.0284027	0.250865	0.107219	0.0320939	0.114766	0.319254
1535	CYBA	-0.365342	0.104468	-3.49716	0.000470239	0.021365	0	4.12659	0.531338	-2.32176	1.24195	-1.29036	-2.38567	-1.37477	-0.421028	-0.391579	0.636502	-0.425676	-0.426707	-0.457423	-0.235885	0.0284448	0.26266	0.108827	0.0319918	0.110708	0.313891
2584	GALK1	-0.364594	0.104378	-3.49301	0.000477615	0.0215594	0	2.91424	0.713205	-2.87099	0.552754	-0.599568	-1.77325	-1.69699	-0.428458	-0.486671	0.277706	-0.196076	-0.315566	-0.568444	-0.240067	0.0287348	0.25241	0.106948	0.0316695	0.112206	0.313941
8522	GAS7	-0.364404	0.104352	-3.49206	0.00047931	0.0215594	0	3.04862	0.69249	-1.89004	0.367772	-0.753595	-2.14243	-2.2143	-1.21431	-0.317745	0.184276	-0.246788	-0.382361	-0.752209	-0.691691	0.0282629	0.251061	0.107244	0.0318516	0.1154	0.324461
8073	PTP4A2	0.364843	0.104523	3.49056	0.000482017	0.0215733	0	4.83097	0.436855	1.38437	0.695786	0.551293	3.76126	0.302031	0.268546	0.232061	0.350555	0.180223	0.684408	0.0992964	0.150257	0.0280994	0.25384	0.10687	0.0331103	0.108084	0.313064
2548	GAA	-0.36395	0.104411	-3.48573	0.00049079	0.0218572	0	3.39326	0.639596	-2.37334	0.646026	-1.05401	-2.05252	-2.04024	0.0844793	-0.40045	0.32514	-0.346417	-0.36604	-0.689497	0.0472296	0.0284692	0.253304	0.108022	0.0318039	0.11421	0.312556
5210	PFKFB4	-0.362863	0.104273	-3.47994	0.00050152	0.0220683	0	1.80544	0.875357	-2.30592	-0.74709	0.108346	-2.35679	-1.15815	-1.06421	-0.388856	-0.376846	0.0353512	-0.421426	-0.383929	-0.603515	0.0284374	0.254438	0.106459	0.0319743	0.109894	0.321606
83999	KREMEN1	-0.363114	0.104366	-3.47925	0.000502811	0.0220683	0	3.62708	0.604252	-2.41632	0.0645307	0.139257	-2.05679	-1.7975	-1.55201	-0.40785	0.0322675	0.0454393	-0.366814	-0.603563	-0.894964	0.02849	0.250033	0.10647	0.0318061	0.112748	0.332524
54838	WBP1L	-0.362704	0.104249	-3.47921	0.00050289	0.0220683	0	1.65278	0.894794	-2.85987	-0.724333	-1.11162	-1.22538	-0.844083	-1.26668	-0.484731	-0.365173	-0.365658	-0.217362	-0.278645	-0.722736	0.0287282	0.254167	0.108202	0.0314651	0.108976	0.325559
1241	LTB4R	-0.3631	0.104433	-3.47686	0.000507319	0.0221546	0	3.96879	0.553918	-3.12469	0.276007	-0.0423218	-2.30349	-0.270901	-0.914472	-0.531122	0.138168	-0.0138079	-0.411692	-0.0890514	-0.516634	0.0288919	0.250597	0.106445	0.0319426	0.108059	0.319173
605	BCL7A	0.362079	0.10428	3.47217	0.000516265	0.0224363	0	2.05287	0.841782	2.22073	0.235489	0.312251	1.90806	2.04808	1.09038	0.374236	0.117847	0.101939	0.33989	0.692303	0.618808	0.0283987	0.250434	0.106579	0.0317318	0.114261	0.322073
57096	RPGRIP1	-0.361467	0.104341	-3.46427	0.000531672	0.0229413	0	2.6356	0.75595	-2.07335	-0.632335	-2.01785	-2.20817	-0.776293	0.6227	-0.34901	-0.318161	-0.676711	-0.394318	-0.25608	0.3498	0.0283353	0.253163	0.112468	0.0318879	0.108817	0.315559
6280	S100A9	-0.361452	0.104372	-3.4631	0.000533988	0.0229413	0	3.28193	0.65661	-3.20688	-0.229034	0.10401	-1.88497	-0.604075	-1.00481	-0.545603	-0.114611	0.0339361	-0.335719	-0.198956	-0.56893	0.028946	0.25041	0.106458	0.0317208	0.108475	0.320592
83706	FERMT3	-0.361527	0.104418	-3.46232	0.000535536	0.0229413	0	3.73149	0.588685	-2.51637	0.668802	-1.03621	-1.60866	-2.25888	-0.419197	-0.425109	0.336763	-0.340481	-0.285961	-0.768431	-0.234855	0.0285399	0.253544	0.107968	0.0316	0.115724	0.313879
23788	MTCH2	0.360593	0.104427	3.45306	0.00055427	0.0236314	0	3.93184	0.559271	2.65694	-1.10158	1.36003	2.2194	0.576219	0.689319	0.449438	-0.56154	0.449218	0.396362	0.18974	0.38765	0.0286138	0.259854	0.109098	0.0318942	0.108428	0.316257
4084	MXD1	-0.359645	0.104234	-3.45037	0.000559816	0.0237552	0	1.86911	0.866943	-1.97938	-0.195537	-0.347478	-2.47114	-1.14413	-1.51051	-0.332968	-0.0978271	-0.113457	-0.442362	-0.379201	-0.869566	0.0282973	0.250299	0.106612	0.0320449	0.109847	0.331404
81037	CLPTM1L	0.359422	0.104275	3.44687	0.000567131	0.0239526	0	2.23139	0.816289	2.16847	0.817162	0.767763	2.54413	-0.0807632	1.29371	0.365281	0.412912	0.251464	0.455761	-0.0265371	0.738829	0.0283757	0.255328	0.107275	0.0320919	0.107964	0.326147
120892	LRRK2	-0.358969	0.104261	-3.443	0.000575296	0.0240684	0	1.53741	0.908713	-2.50364	-0.476716	-0.557249	-1.96341	-1.63939	0.207548	-0.422911	-0.239209	-0.182178	-0.3499	-0.54843	0.116086	0.0285334	0.251788	0.106879	0.0317588	0.111912	0.312837
1118	CHIT1	-0.359097	0.104346	-3.44142	0.000578663	0.0240684	0	3.04143	0.693598	-1.59315	-1.38565	0.103084	-2.816	-1.22232	-0.996079	-0.267348	-0.714592	0.0336341	-0.505943	-0.405616	-0.563862	0.0281606	0.265958	0.106457	0.0322805	0.110119	0.320449
3490	IGFBP7	-0.359026	0.104401	-3.43892	0.000584032	0.0240684	0	3.89722	0.564306	-0.790059	-0.817514	-1.20803	-3.31864	-0.875844	-1.09137	-0.132138	-0.413093	-0.397967	-0.599993	-0.289235	-0.619384	0.027973	0.255333	0.108526	0.0326868	0.109055	0.322091
151987	PPP4R2	-0.37397	0.108783	-3.43776	0.000586538	0.0240684	4.01421	5.2091	0.390898	-3.48435	-0.427986	-1.6392	-0.378127	-1.51807	-0.687417	-0.594802	-0.214608	-0.54451	-0.0668953	-0.506522	-0.386568	0.0291408	0.251439	0.110344	0.031298	0.11133	0.316236
7462	LAT2	-0.358265	0.104227	-3.43735	0.000587426	0.0240684	0	1.72755	0.885411	-2.21106	-0.805855	-1.45134	-1.16562	-1.67022	-1.32291	-0.372577	-0.407079	-0.480208	-0.206705	-0.559132	-0.756258	0.0283944	0.255179	0.109477	0.0314474	0.112068	0.326798
965	CD58	-0.358426	0.10429	-3.43681	0.0005886	0.0240684	0	2.54326	0.769966	-1.82481	-0.98303	-1.28559	-2.57888	0.142434	-1.3172	-0.306649	-0.499109	-0.424067	-0.462152	0.0468049	-0.752844	0.0282389	0.257785	0.108809	0.0321149	0.107983	0.326669
4841	NONO	0.359034	0.104278	3.44305	0.000575183	0.0240684	0	1.75641	0.881718	2.7873	0.211721	1.41482	1.91668	0.189326	0.293177	0.472085	0.105935	0.467794	0.341449	0.0622205	0.164067	0.0286862	0.250351	0.109322	0.031736	0.108005	0.313173
1511	CTSG	-0.358526	0.104375	-3.435	0.000592563	0.0241208	0	3.20772	0.667996	-2.17254	-1.29186	-0.589503	-2.8167	0.289033	-0.503235	-0.365977	-0.663461	-0.19277	-0.506074	0.0950183	-0.282212	0.0283775	0.263756	0.106932	0.032281	0.108073	0.314491
54583	EGLN1	-0.357599	0.104225	-3.43103	0.000601301	0.0242595	0	1.07774	0.956055	-1.56979	-0.701631	-1.48196	-2.49474	-1.21226	-0.0605924	-0.263394	-0.353545	-0.490638	-0.44669	-0.402214	-0.0338737	0.0281533	0.253906	0.10961	0.03206	0.110083	0.312529
23765	IL17RA	-0.382244	0.111409	-3.431	0.000601365	0.0242595	6.36495	5.33988	0.375823	-2.70448	0.245507	-0.517004	-1.51024	-2.90487	-0.552412	-0.457686	0.122869	-0.168973	-0.268304	-1.01229	-0.309992	0.0286397	0.250472	0.106818	0.0315617	0.121438	0.314902
55512	SMPD3	0.357479	0.104228	3.42977	0.000604088	0.0242606	0	2.52509	0.772712	1.90649	1.12548	0.853224	1.57007	1.53109	1.96206	0.320547	0.574218	0.279712	0.279034	0.511003	1.15375	0.0282692	0.260304	0.107472	0.0315847	0.11139	0.345778
8723	SNX4	0.403907	0.117881	3.42639	0.000611665	0.0244557	12.3265	5.70298	0.336202	3.63635	0.704337	-0.711973	2.61991	0.877547	0.46408	0.621971	0.354931	-0.233063	0.469706	0.289803	0.26013	0.0292556	0.253937	0.107157	0.0321424	0.10906	0.314192
9318	COPS2	0.357139	0.104458	3.41896	0.000628619	0.0250224	0	4.42695	0.489716	2.32266	-0.477989	1.18353	3.00484	-0.206171	0.143886	0.391733	-0.239852	0.389742	0.541072	-0.0677593	0.0804556	0.0284452	0.251798	0.108441	0.0324241	0.108015	0.312662
29108	PYCARD	-0.356398	0.10444	-3.41246	0.000643782	0.0254959	0	4.54709	0.473607	-2.91644	-1.0705	-0.420723	-2.3072	-0.296771	0.975786	-0.494608	-0.545097	-0.137423	-0.412369	-0.0975649	0.552092	0.0287618	0.259285	0.106691	0.0319448	0.10808	0.32012
978	CDA	-0.356302	0.104451	-3.41118	0.000646823	0.0254959	0	4.56743	0.470913	-2.19914	-0.0275533	0.677023	-2.84554	-1.54436	-0.652791	-0.370534	-0.0137768	0.221551	-0.511423	-0.515575	-0.366881	0.0283891	0.250006	0.107088	0.0323022	0.111452	0.315865
23223	RRP12	-0.355361	0.104204	-3.41026	0.000649018	0.0254959	0	0.956488	0.965998	-1.80111	-1.35433	-0.800735	-2.10847	-1.52612	-0.303732	-0.302621	-0.697451	-0.262353	-0.376191	-0.509294	-0.169987	0.0282304	0.265201	0.107348	0.0318334	0.111367	0.313222
23022	PALLD	-0.354754	0.104181	-3.40517	0.000661219	0.0258623	0	0.631631	0.986509	-1.82121	-0.589706	-1.1246	-2.35672	-1.319	-0.0604122	-0.306038	-0.296468	-0.369998	-0.421414	-0.438423	-0.033773	0.0282376	0.252747	0.108244	0.0319743	0.110484	0.312529
23355	VPS8	-0.354896	0.104463	-3.39732	0.000680481	0.0265005	0	4.63458	0.462082	-1.56584	-2.31395	-0.310821	-2.78066	-0.699175	-0.22953	-0.262725	-1.2679	-0.101471	-0.499395	-0.230466	-0.128396	0.0281521	0.300237	0.106578	0.0322547	0.108653	0.312912
4179	CD46	-0.354674	0.104441	-3.39593	0.000683947	0.0265206	0	4.3221	0.504032	-1.33264	-1.92928	-1.0761	-2.99771	-0.430272	0.164402	-0.223334	-1.02617	-0.35379	-0.539742	-0.141545	0.0919343	0.0280856	0.282907	0.10809	0.0324185	0.108218	0.312711
8677	STX10	-0.354226	0.104409	-3.39267	0.000692153	0.0267169	0	3.97857	0.552505	-1.63423	0.467111	-1.37699	-3.07806	-1.03822	0.389125	-0.274306	0.234356	-0.454961	-0.554757	-0.343568	0.21794	0.0281737	0.251716	0.109166	0.0324827	0.109508	0.313687
57380	MRS2	0.354044	0.10439	3.39156	0.000694948	0.0267169	0	4.09747	0.535469	1.36725	-0.825488	1.53116	2.84356	1.19316	1.09339	0.229171	-0.41721	0.507438	0.511056	0.395753	0.620565	0.0280947	0.25544	0.109831	0.0323008	0.110015	0.322128
8676	STX11	-0.353106	0.104203	-3.38865	0.000702375	0.0268875	0	1.02892	0.9602	-1.92803	-0.917185	-1.21403	-2.44266	-0.704727	0.127311	-0.324216	-0.464742	-0.399982	-0.437141	-0.232309	0.0711833	0.0282774	0.25675	0.108548	0.032027	0.108665	0.312627
166	AES	0.352899	0.104186	3.38722	0.000706057	0.0269139	0	1.84564	0.870064	2.50693	0.596823	0.680831	1.43063	1.13371	1.69778	0.423479	0.300086	0.222805	0.254044	0.375686	0.985249	0.0285351	0.252814	0.107096	0.0315327	0.109812	0.336768
2124	EVI2B	-0.353115	0.104387	-3.38275	0.000717634	0.0272398	0	3.72134	0.590191	-2.4575	0.503087	-0.510282	-2.89826	-0.127332	-0.44209	-0.414948	0.252544	-0.166768	-0.521218	-0.0418411	-0.247742	0.0285102	0.251993	0.106809	0.0323418	0.107978	0.314034
2204	FCAR	-0.352019	0.104209	-3.37802	0.000730108	0.0275969	0	2.45945	0.782589	-1.94616	-0.00966901	-1.10051	-1.68627	-1.61719	-1.8474	-0.327304	-0.00483451	-0.361942	-0.299909	-0.540735	-1.07982	0.0282844	0.250001	0.108166	0.0316319	0.111802	0.34165
81846	SBF2	-0.352123	0.104351	-3.37443	0.000739698	0.0277991	0	3.31301	0.65185	-1.18406	-0.961773	-0.954475	-2.62506	-2.12338	0.24909	-0.198304	-0.487992	-0.313286	-0.470654	-0.71933	0.139354	0.0280489	0.257442	0.107734	0.0321458	0.114763	0.312985
11237	RNF24	-0.35213	0.104402	-3.37282	0.000744021	0.0277991	0	4.88884	0.429596	-2.5695	0.892993	-0.22812	-1.83132	-1.72986	-1.5706	-0.434294	0.452166	-0.0744508	-0.326036	-0.579902	-0.906386	0.0285673	0.256389	0.106516	0.0316958	0.112379	0.333038
967	CD63	-0.351437	0.10424	-3.37142	0.00074782	0.0277991	0	1.96046	0.854589	-2.488	-0.513487	0.182314	-2.26614	-0.953455	-0.891867	-0.42021	-0.257808	0.0594938	-0.404877	-0.315162	-0.503601	0.0285255	0.252077	0.106489	0.0319209	0.109261	0.31884
122830	NAA30	0.352146	0.104427	3.37216	0.000745804	0.0277991	0	4.37491	0.496792	2.74705	0.577655	-0.374043	2.66762	0.64845	-0.435712	0.465083	0.290345	-0.122146	0.478501	0.21365	-0.24415	0.0286634	0.252634	0.106639	0.0321749	0.108555	0.31399
6573	SLC19A1	-0.350928	0.104258	-3.36596	0.000762772	0.0279623	0	1.97041	0.853224	-2.69808	-0.50792	0.0127551	-2.23865	-0.855709	-0.136129	-0.456576	-0.25499	0.00416141	-0.399868	-0.28252	-0.0761163	0.0286362	0.252032	0.106443	0.0319051	0.109005	0.312645
7920	ABHD16A	-0.350494	0.104164	-3.36483	0.0007659	0.0279623	0	1.57787	0.903912	-1.55114	-1.02532	-0.829642	-2.25857	-1.01432	-1.61999	-0.260238	-0.521294	-0.271909	-0.403498	-0.335549	-0.936858	0.0281475	0.258492	0.107415	0.0319165	0.109436	0.334443
6036	RNASE2	-0.350742	0.104281	-3.36343	0.000769802	0.0279623	0	2.79261	0.731922	-2.50175	-0.396825	-0.310175	-2.4841	0.0865988	-1.18937	-0.422584	-0.198903	-0.10126	-0.444738	0.0284547	-0.676959	0.0285324	0.251236	0.106577	0.0320532	0.107965	0.323957
7130	TNFAIP6	-0.350227	0.10415	-3.36273	0.000771769	0.0279623	0	0.611044	0.987492	-2.12409	-0.347889	-0.48467	-2.33187	-1.08772	-0.656164	-0.357684	-0.174274	-0.158371	-0.416872	-0.360201	-0.368797	0.0283566	0.250949	0.106773	0.0319594	0.109662	0.3159
7805	LAPTM5	-0.350557	0.104335	-3.35991	0.000779685	0.0279623	0	3.16191	0.67504	-1.45335	0.412597	-1.75509	-2.88973	-0.756424	-0.406638	-0.243706	0.206849	-0.584578	-0.519632	-0.249475	-0.227789	0.0281186	0.251337	0.110939	0.0323353	0.108773	0.313797
217	ALDH2	-0.350429	0.104345	-3.35838	0.000784006	0.0279623	0	3.40209	0.638252	-1.57937	-0.553657	-0.502523	-2.86248	-1.75951	0.581109	-0.265015	-0.278164	-0.164224	-0.514569	-0.590259	0.32623	0.0281563	0.252418	0.106797	0.0323148	0.112539	0.315161
55711	FAR2	-0.350323	0.104336	-3.35764	0.000786112	0.0279623	0	3.35243	0.645825	-2.54615	-0.199689	0.546825	-2.43674	-1.12169	-0.780073	-0.430256	-0.0999066	0.178757	-0.436056	-0.371637	-0.439429	0.0285552	0.250312	0.106863	0.0320233	0.109772	0.317327
27180	SIGLEC9	-0.350379	0.104377	-3.35687	0.000788301	0.0279623	0	4.66207	0.458496	-2.1329	0.564731	-1.21056	-1.31248	-2.35101	-1.53204	-0.359192	0.283783	-0.398817	-0.232914	-0.802179	-0.882727	0.0283604	0.252517	0.108535	0.0314925	0.116422	0.33198
10211	FLOT1	-0.350223	0.104372	-3.35553	0.000792139	0.0279623	0	4.15342	0.527546	-2.12505	1.14016	-1.01582	-2.56466	-0.743173	-1.19812	-0.357849	0.582024	-0.33369	-0.459535	-0.245072	-0.682123	0.028357	0.260586	0.107908	0.0321054	0.108745	0.324132
7077	TIMP2	-0.350266	0.104388	-3.35544	0.000792386	0.0279623	0	4.03467	0.544436	-2.94555	-0.570143	0.722249	-2.10137	-0.957885	-0.661329	-0.499698	-0.28653	0.23645	-0.374903	-0.316644	-0.371732	0.0287794	0.252566	0.107178	0.0318296	0.109274	0.315955
2242	FES	-0.349386	0.104156	-3.35444	0.000795259	0.0279623	0	0.669219	0.984615	-2.20226	-0.31934	-0.840155	-2.39211	-0.570229	-0.465118	-0.371069	-0.159925	-0.275387	-0.427886	-0.187759	-0.260715	0.0283905	0.250799	0.10744	0.0319957	0.108418	0.314199
1545	CYP1B1	-0.349704	0.104279	-3.35355	0.00079781	0.0279623	0	2.55364	0.768396	-1.60313	-0.345284	-2.46864	-2.00306	-0.720935	-0.696088	-0.269038	-0.172964	-0.83978	-0.357076	-0.237688	-0.391503	0.0281637	0.250935	0.115722	0.0317786	0.108698	0.316332
1130	LYST	-0.349288	0.104166	-3.3532	0.000798834	0.0279623	0	1.44687	0.919118	-2.31422	-1.27252	-0.609243	-1.67485	-0.741449	-1.41061	-0.390283	-0.652997	-0.199256	-0.297856	-0.2445	-0.808932	0.0284413	0.263325	0.106965	0.0316271	0.108741	0.328859
2288	FKBP4	0.350789	0.104411	3.35968	0.000780326	0.0279623	0	4.14276	0.529051	2.1416	1.50821	0.295884	2.90852	-0.132821	-0.066628	0.36068	0.782425	0.0965894	0.523125	-0.0436453	-0.0372482	0.0283641	0.269131	0.106565	0.0323495	0.10798	0.312535
29083	GTPBP8	0.350506	0.104295	3.36071	0.000777438	0.0279623	0	3.03659	0.694344	1.69659	0.472555	0.153601	3.07806	0.488101	1.22185	0.284876	0.237106	0.0501209	0.554757	0.160625	0.696152	0.0281942	0.251757	0.106476	0.0324827	0.108294	0.324616
23569	PADI4	-0.349459	0.104342	-3.34918	0.000810517	0.0282613	0	3.7406	0.587334	-2.49032	1.02965	-0.692455	-2.28433	-0.803198	-1.16316	-0.420611	0.523571	-0.226633	-0.408196	-0.26503	-0.661508	0.0285267	0.258566	0.107118	0.0319314	0.108879	0.32344
9282	MED14	-0.401783	0.120235	-3.34165	0.000832828	0.0288061	14.3279	5.8362	0.322485	-2.1555	-0.893838	0.299612	-3.30147	-2.16964	0.426344	-0.363059	-0.452605	0.0978077	-0.59675	-0.736024	0.238877	0.0283701	0.256402	0.106568	0.0326716	0.115083	0.313927
533	ATP6V0B	-0.34826	0.10422	-3.34158	0.000833039	0.0288061	0	1.68343	0.890981	-1.51113	-0.758003	-0.439992	-2.91443	-1.01337	-0.526362	-0.253472	-0.382451	-0.143733	-0.524225	-0.33523	-0.29527	0.0281355	0.254571	0.106714	0.032354	0.109433	0.31468
5836	PYGL	-0.348139	0.104212	-3.34068	0.000835747	0.0288061	0	2.26332	0.811639	-2.44861	0.0961377	-0.205199	-1.97521	-1.1573	-1.46138	-0.413415	0.0480758	-0.0669657	-0.352035	-0.383642	-0.839656	0.0285058	0.250072	0.106502	0.0317646	0.109891	0.330126
8778	SIGLEC5	-0.347978	0.104253	-3.33781	0.000844409	0.0289935	0	2.43107	0.786839	-1.64028	0.309924	-1.44404	-1.9513	-2.0429	-0.848069	-0.275331	0.155195	-0.477724	-0.347708	-0.69045	-0.478406	0.0281756	0.250753	0.109445	0.0317528	0.114227	0.318222
118788	PIK3AP1	-0.347309	0.104169	-3.33409	0.000855793	0.0292727	0	1.62461	0.898257	-2.02966	-0.0240278	-1.36177	-1.52164	-1.62391	-1.34676	-0.341547	-0.012014	-0.449807	-0.270348	-0.543063	-0.770531	0.0283174	0.250005	0.109105	0.031566	0.111835	0.327343
3577	CXCR1	-0.373441	0.11212	-3.33072	0.000866213	0.0295169	7.18995	5.38735	0.370457	-2.72619	0.596237	0.0929416	-2.71128	-0.718381	-1.75113	-0.461458	0.299788	0.0303244	-0.486561	-0.23684	-1.01874	0.0286518	0.252809	0.106455	0.0322053	0.108693	0.338446
8291	DYSF	-0.425224	0.127732	-3.32904	0.000871456	0.0295835	20.5526	6.29347	0.278701	-2.55683	1.17571	-1.45057	-2.0251	-2.49511	-1.46806	-0.432102	0.60098	-0.479946	-0.361068	-0.855595	-0.843717	0.0285607	0.261287	0.109473	0.0317898	0.117587	0.330296
11240	PADI2	-0.347041	0.104281	-3.32796	0.000874844	0.0295868	0	2.55004	0.76894	-2.82142	-0.0644887	-0.0380405	-2.13378	-1.04989	0.0635286	-0.478028	-0.0322465	-0.012411	-0.380789	-0.347485	0.0355154	0.0287058	0.250032	0.106445	0.031847	0.109543	0.312532
26268	FBXO9	-0.497069	0.149629	-3.32201	0.000893715	0.0298232	37.0953	7.94854	0.159095	-4.29683	-1.47202	0.595558	-2.14115	-2.36161	-0.895079	-0.74205	-0.76227	0.194759	-0.382127	-0.806081	-0.505452	0.0298243	0.268158	0.106942	0.0318509	0.116504	0.318887
963	CD53	-0.345893	0.10416	-3.32078	0.000897649	0.0298232	0	1.31787	0.933082	-1.93938	-0.661977	-1.24057	-2.30919	-0.123356	-1.12227	-0.326149	-0.333278	-0.408905	-0.412731	-0.0405345	-0.637484	0.0282817	0.253471	0.108643	0.031946	0.107976	0.32266
5657	PRTN3	-0.346289	0.104286	-3.32057	0.000898327	0.0298232	0	2.8797	0.718526	-1.71638	-0.909181	-0.58287	-3.01596	0.0594997	-0.833098	-0.288234	-0.460578	-0.190591	-0.543148	0.0195499	-0.46981	0.0282009	0.256629	0.106921	0.0324329	0.10796	0.318018
55799	CACNA2D3	-0.346117	0.104235	-3.32055	0.000898409	0.0298232	0	1.92284	0.859715	-2.30436	-1.07752	-0.522003	-2.47226	-0.28462	0.110474	-0.388588	-0.548808	-0.170612	-0.442567	-0.0935659	0.0617664	0.0284367	0.259412	0.106826	0.0320456	0.10807	0.312595
3958	LGALS3	0.346129	0.104164	3.32293	0.000890785	0.0298232	0	1.3281	0.932013	1.7755	1.5265	1.34953	1.52837	1.28809	1.03491	0.298269	0.792657	0.445663	0.271554	0.427917	0.586434	0.0282213	0.269635	0.109056	0.0315686	0.110364	0.321098
5336	PLCG2	-0.345389	0.104233	-3.31364	0.000920909	0.0304577	0	3.20764	0.668008	-1.50584	0.0872405	-0.559897	-2.46666	-1.44001	-1.85502	-0.252578	0.0436254	-0.183047	-0.44154	-0.479727	-1.0847	0.0281339	0.250059	0.106883	0.0320421	0.110983	0.341914
8887	TAX1BP1	0.345284	0.104345	3.30906	0.000936091	0.0308464	0	3.58412	0.610698	2.41703	0.969475	1.75728	2.1018	-0.494974	-0.0389071	0.407972	0.492017	0.585336	0.37498	-0.162894	-0.0217502	0.0284903	0.257565	0.110951	0.0318298	0.108304	0.312512
8876	VNN1	-0.344598	0.104175	-3.30789	0.000940027	0.0308631	0	1.92119	0.859939	-1.80769	-0.680127	-1.2124	-1.36793	-1.98098	-1.36658	-0.303739	-0.342548	-0.399435	-0.242826	-0.668364	-0.782423	0.0282327	0.253667	0.108542	0.0315109	0.113832	0.327805
4792	NFKBIA	-0.344153	0.104152	-3.30435	0.000951973	0.0310927	0	1.26818	0.938171	-1.72536	-0.695294	-0.330469	-2.5656	-0.94406	-1.06952	-0.289757	-0.350303	-0.107895	-0.459708	-0.312019	-0.606614	0.0282039	0.253835	0.106596	0.0321061	0.109236	0.3217
8301	PICALM	-0.344357	0.104231	-3.30377	0.000953933	0.0310927	0	2.93654	0.709769	-2.49254	0.357944	-1.43394	-1.24176	-1.18647	-1.58263	-0.420994	0.179331	-0.474292	-0.220286	-0.393492	-0.913787	0.0285278	0.251005	0.109402	0.0314701	0.109992	0.333375
9989	PPP4R1	-0.343621	0.104113	-3.30045	0.000965299	0.0312883	0	0.919428	0.968799	-1.68802	-1.11923	-0.714662	-2.13689	-1.02021	-1.26193	-0.283423	-0.570899	-0.23395	-0.381353	-0.337524	-0.719916	0.0281913	0.260185	0.107163	0.0318486	0.109454	0.325457
22911	WDR47	-0.344429	0.104373	-3.29999	0.00096689	0.0312883	0	4.05807	0.541085	-0.798807	-1.12765	-1.48678	-3.04594	-1.2201	0.247801	-0.133605	-0.575371	-0.492283	-0.54875	-0.404865	0.138632	0.0279744	0.260345	0.109631	0.0324568	0.110111	0.31298
23157	2019-09-06	-0.343248	0.104132	-3.29626	0.0009798	0.0315483	0	0.669611	0.984595	-2.39121	-0.870138	-1.38398	-1.59217	-0.760963	-0.174587	-0.403525	-0.440309	-0.457331	-0.283	-0.250983	-0.0976343	0.0284778	0.256059	0.109195	0.0315934	0.108783	0.312738
170082	TCEANC	-0.343356	0.104196	-3.29529	0.000983189	0.0315483	0	1.59428	0.90194	-2.22716	-1.51149	-1.3436	-1.28102	-1.32093	-0.131244	-0.375339	-0.784261	-0.443659	-0.227296	-0.43908	-0.0733836	0.0284015	0.269221	0.109032	0.0314824	0.110491	0.312635
4057	LTF	-0.343535	0.104271	-3.29465	0.000985446	0.0315483	0	3.40588	0.637674	-2.2792	-0.442777	0.345247	-2.48224	-0.587824	-1.49785	-0.384268	-0.22207	0.112727	-0.444397	-0.193579	-0.86184	0.0284251	0.251541	0.10661	0.032052	0.108448	0.331069
219972	MPEG1	-0.343458	0.104292	-3.29324	0.00099041	0.0315798	0	3.04667	0.692791	-1.37858	-0.0997401	-1.74825	-2.50714	-1.56457	0.437778	-0.231084	-0.0498778	-0.582203	-0.448966	-0.522545	0.245314	0.0280978	0.250078	0.110903	0.0320679	0.111547	0.314004
6450	SH3BGR	0.446655	0.135663	3.29237	0.000993451	0.0315798	27.2206	6.87008	0.230484	3.74622	0.942179	-0.864449	3.31529	1.09064	0.812105	0.641711	0.477763	-0.283428	0.599361	0.361183	0.45777	0.0293422	0.257133	0.1075	0.0326838	0.109671	0.317739
8218	CLTCL1	-0.342639	0.104214	-3.28785	0.00100957	0.0319211	0	1.90027	0.862766	-1.71209	-1.18738	-0.633535	-2.56834	-1.11909	0.344933	-0.287506	-0.607217	-0.207242	-0.460212	-0.370761	0.193111	0.0281994	0.261522	0.107008	0.0321079	0.109763	0.313432
93663	ARHGAP18	-0.342983	0.104334	-3.28737	0.00101128	0.0319211	0	4.44568	0.487184	-2.53135	-0.491867	0.703986	-1.89384	-1.46182	-1.54392	-0.427697	-0.246869	0.230432	-0.337322	-0.487199	-0.890004	0.0285475	0.251905	0.107141	0.031725	0.111078	0.332303
79847	MFSD13A	-0.342884	0.104351	-3.28586	0.00101672	0.0319567	0	4.29985	0.5071	-2.57087	0.2008	0.355832	-1.76468	-2.01902	-1.06296	-0.43453	0.100463	0.116189	-0.314023	-0.681918	-0.602787	0.028568	0.250315	0.10662	0.0316657	0.114073	0.321584
23001	WDFY3	-0.34235	0.104213	-3.28508	0.00101952	0.0319567	0	2.93622	0.709818	-2.25481	-0.556437	-0.175406	-1.4397	-1.85098	-1.67468	-0.380082	-0.279574	-0.0572388	-0.255666	-0.622357	-0.97083	0.028414	0.252443	0.106486	0.0315359	0.113051	0.336063
10489	LRRC41	0.342214	0.10421	3.28388	0.00102387	0.0319816	0	2.01817	0.846625	2.63129	0.825659	0.392365	1.18245	1.81752	0.584062	0.444992	0.417299	0.128141	0.209706	0.61059	0.327902	0.0285999	0.255442	0.106659	0.0314523	0.11286	0.315188
4217	MAP3K5	-0.426942	0.130094	-3.28178	0.00103154	0.0321097	22.7943	6.4762	0.262598	-3.96919	-1.20398	0.660267	-1.93946	-1.47513	-1.00714	-0.682051	-0.616104	0.216036	-0.345568	-0.491767	-0.570285	0.0295276	0.261862	0.107057	0.031747	0.111137	0.320631
8530	CST7	-0.341928	0.104269	-3.27928	0.00104072	0.0322839	0	3.42314	0.635048	-2.24374	-0.316336	0.500967	-2.26874	-1.293	-1.40442	-0.378181	-0.158416	0.163714	-0.405352	-0.429586	-0.805197	0.028409	0.250784	0.106795	0.0319224	0.110383	0.328709
4695	NDUFA2	0.342044	0.104366	3.27737	0.0010478	0.0323918	0	4.09897	0.535257	3.26741	1.11289	0.00544649	1.6219	0.46128	-0.286799	0.556294	0.567538	0.00177695	0.28834	0.151773	-0.16049	0.0289869	0.260066	0.106443	0.0316053	0.108258	0.313144
163050	ZNF564	-0.34152	0.104328	-3.27353	0.00106213	0.0323993	0	3.54401	0.616738	-1.59345	-1.39822	-0.814262	-3.00873	-0.108673	0.196574	-0.267399	-0.721496	-0.266824	-0.541798	-0.0357088	0.109942	0.0281607	0.266267	0.107379	0.0324272	0.107971	0.312802
26253	CLEC4E	-0.340943	0.104231	-3.27105	0.00107151	0.0323993	0	2.78548	0.733017	-2.05674	0.124987	-1.32039	-2.418	0.112832	-1.27926	-0.346172	0.062509	-0.435811	-0.432624	0.0370758	-0.730223	0.0283285	0.250122	0.108942	0.0320117	0.107973	0.325831
80230	RUFY1	-0.340932	0.104228	-3.27101	0.00107163	0.0323993	0	2.34148	0.800156	-1.68746	-0.0940595	-0.100868	-2.63817	-1.68448	-0.614031	-0.283328	-0.0470362	-0.0329108	-0.473071	-0.564091	-0.344883	0.0281911	0.250069	0.106457	0.0321547	0.112141	0.315474
4067	LYN	-0.340567	0.104119	-3.27094	0.00107192	0.0323993	0	0.972646	0.964742	-2.56689	-0.116985	-0.826203	-1.50181	-1.10119	-0.958344	-0.433841	-0.058505	-0.270772	-0.266793	-0.364732	-0.541989	0.0285659	0.250107	0.107407	0.0315586	0.109705	0.319844
55922	NKRF	-0.340886	0.104228	-3.27057	0.00107331	0.0323993	0	2.27548	0.809862	-1.72839	-1.23164	-0.612759	-2.52484	-1.20491	0.515504	-0.290271	-0.630956	-0.200412	-0.452217	-0.399726	0.289137	0.0282049	0.262441	0.106971	0.0320794	0.110057	0.31459
3295	HSD17B4	-0.484792	0.148269	-3.26967	0.00107674	0.0323993	36.0847	7.82286	0.166272	-2.71464	0.783742	-0.350201	-3.2158	-2.58215	-2.16458	-0.459452	0.395687	-0.114347	-0.580603	-0.88826	-1.28781	0.0286454	0.254893	0.106615	0.0325973	0.118336	0.353961
60672	MIIP	-0.341195	0.104352	-3.26964	0.00107685	0.0323993	0	4.0378	0.543987	-1.92886	0.110782	0.199683	-2.48216	-2.17734	-0.231792	-0.324357	0.0554015	0.0651647	-0.444382	-0.738812	-0.129663	0.0282777	0.250096	0.106498	0.0320519	0.115137	0.31292
80063	ATF7IP2	0.341465	0.104376	3.27148	0.00106985	0.0323993	0	4.38827	0.49497	1.13161	0.535462	2.72476	2.37257	0.470358	0.498947	0.18948	0.268939	0.935854	0.424311	0.154768	0.279792	0.028037	0.25226	0.117967	0.0319838	0.10827	0.314457
140803	TRPM6	-0.340352	0.104216	-3.26585	0.00109138	0.0324282	0	2.09713	0.835549	-2.76405	0.484469	-0.982653	-1.81422	-0.669765	-0.427339	-0.468039	0.243128	-0.322652	-0.322952	-0.220713	-0.239437	0.028673	0.251847	0.107812	0.031688	0.108596	0.313933
5175	PECAM1	-0.340947	0.104398	-3.26583	0.00109146	0.0324282	0	4.58842	0.468141	-0.857644	-0.57361	-1.12776	-3.53312	-0.656358	-0.0621147	-0.14347	-0.288291	-0.371054	-0.640695	-0.21627	-0.0347248	0.0279839	0.252597	0.108254	0.032884	0.10857	0.31253
3759	KCNJ2	-0.34056	0.104342	-3.26388	0.00109898	0.0324282	0	4.04581	0.542839	-3.35344	-0.800122	0.170106	-1.43314	-0.360123	-0.774895	-0.571528	-0.404124	0.0555085	-0.254493	-0.118425	-0.436468	0.0290466	0.255104	0.106483	0.0315335	0.108139	0.317263
4082	MARCKS	-0.340514	0.104332	-3.26376	0.00109944	0.0324282	0	4.03724	0.544067	-2.46858	0.5837	-0.091454	-1.73725	-2.11787	-0.861969	-0.41686	0.293416	-0.029839	-0.309082	-0.717347	-0.486394	0.0285158	0.25269	0.106454	0.0316537	0.114725	0.318414
3029	HAGH	0.340037	0.104135	3.26536	0.00109323	0.0324282	0	0.926802	0.968251	2.65136	0.702457	0.445098	1.78591	0.739131	0.363797	0.44847	0.353968	0.145405	0.317848	0.24373	0.203706	0.0286107	0.253915	0.106721	0.0316752	0.108736	0.313537
6895	TARBP2	0.340366	0.104224	3.26571	0.00109191	0.0324282	0	2.93376	0.710198	2.94712	0.770299	1.00359	0.861051	0.647643	1.46685	0.499973	0.388771	0.32962	0.152509	0.213382	0.842979	0.0287803	0.254723	0.107872	0.0313714	0.108554	0.330265
109	ADCY3	0.340319	0.10432	3.26225	0.00110533	0.0324954	0	3.63399	0.603217	2.06875	-0.276401	2.15295	1.41558	1.80737	-0.120191	0.348223	-0.138366	0.724864	0.25135	0.607027	-0.0672011	0.0283334	0.250598	0.113356	0.0315273	0.112803	0.312613
128866	CHMP4B	0.340305	0.104373	3.26046	0.00111232	0.0325941	0	4.34227	0.50126	3.26574	0.938537	0.711083	1.59273	-0.51141	0.350704	0.555999	0.475864	0.23277	0.283102	-0.168321	0.196352	0.0289858	0.257076	0.107155	0.0315936	0.108327	0.313464
7940	LST1	-0.339872	0.104337	-3.25746	0.00112415	0.0328339	0	4.15419	0.527437	-2.75401	-0.988892	-0.950849	-2.06422	-0.106975	1.013	-0.466294	-0.502179	-0.312082	-0.368162	-0.0351507	0.573691	0.0286674	0.257881	0.107724	0.03181	0.107971	0.320728
4987	OPRL1	-0.339363	0.104268	-3.25472	0.00113504	0.032989	0	3.54445	0.616672	-0.792566	-0.458978	-1.85854	-2.19561	-1.80548	-1.32823	-0.132559	-0.230248	-0.620627	-0.392031	-0.606362	-0.759442	0.0279734	0.251657	0.111511	0.0318809	0.112792	0.326919
80005	DOCK5	-0.358939	0.110297	-3.25428	0.00113679	0.032989	5.52875	5.29262	0.381222	-2.81478	-0.041061	0.814193	-2.43397	-1.09111	-1.35132	-0.476871	-0.020531	0.266801	-0.435549	-0.36134	-0.773268	0.028702	0.250013	0.107379	0.0320216	0.109673	0.327449
10008	KCNE3	-0.33913	0.104334	-3.25044	0.00115227	0.0333307	0	3.76894	0.583139	-2.13323	-1.53932	-0.299597	-2.69853	0.189271	-0.0802913	-0.359248	-0.799843	-0.097803	-0.484207	0.0622024	-0.0448878	0.0283605	0.269992	0.106568	0.0321964	0.108005	0.31255
2176	FANCC	0.338479	0.104257	3.24657	0.00116803	0.0336782	0	3.3589	0.644837	2.07528	0.602185	-0.566605	2.36349	1.28365	1.29416	0.349339	0.302813	-0.18525	0.422651	0.426408	0.739093	0.0283361	0.252865	0.106894	0.0319783	0.110347	0.326156
10170	DHRS9	-0.459413	0.141599	-3.24447	0.00117671	0.0338202	31.7856	7.32984	0.197243	-4.13435	-0.351283	-1.1206	-0.727595	-1.84114	-1.82413	-0.712183	-0.175981	-0.368661	-0.128818	-0.618893	-1.06497	0.0296735	0.250968	0.108231	0.0313454	0.112994	0.340854
2053	EPHX2	0.337853	0.104207	3.24214	0.00118634	0.0339882	0	2.49822	0.776763	2.66409	1.0555	0.452476	0.919291	1.62779	1.04819	0.450678	0.537186	0.147822	0.162858	0.544407	0.594175	0.0286176	0.259018	0.10673	0.0313842	0.111854	0.321326
8428	STK24	0.35354	0.109107	3.24031	0.001194	0.0340993	4.39545	5.22988	0.388475	3.01373	-1.10113	0.979502	2.38971	0.117475	0.412247	0.511637	-0.561301	0.321604	0.427446	0.0386015	0.230944	0.0288213	0.259846	0.107803	0.0319943	0.107974	0.313833
6850	SYK	-0.337387	0.104214	-3.23745	0.00120603	0.0343154	0	2.41083	0.78986	-2.50549	0.620633	-1.4022	-1.41764	-1.322	-0.711147	-0.42323	0.312201	-0.46351	-0.251718	-0.439444	-0.40008	0.0285343	0.253046	0.109269	0.0315281	0.110495	0.316502
51	ACOX1	-0.337657	0.104342	-3.23605	0.00121196	0.0343154	0	4.52405	0.476672	-2.04456	1.05121	-1.05514	-1.69091	-2.13642	-1.0835	-0.344092	0.534923	-0.346796	-0.300744	-0.72403	-0.614781	0.0283235	0.258942	0.108025	0.0316339	0.114852	0.321949
5724	PTAFR	-0.337232	0.104219	-3.2358	0.00121302	0.0343154	0	2.31341	0.804295	-2.8674	0.366245	-0.55903	-1.63027	-1.18533	-0.228884	-0.486045	0.183508	-0.182763	-0.289842	-0.393109	-0.128034	0.0287327	0.251052	0.106882	0.0316087	0.109988	0.31291
79993	ELOVL7	-0.336619	0.104141	-3.23235	0.00122777	0.0346237	0	1.3682	0.92776	-2.11313	-0.413336	-0.534107	-1.62511	-1.98251	-0.568797	-0.35581	-0.207222	-0.174583	-0.288916	-0.668908	-0.319261	0.028352	0.251342	0.106844	0.0316066	0.113842	0.315048
10105	PPIF	-0.336731	0.104214	-3.23115	0.00123293	0.034647	0	3.37508	0.642368	-1.89203	0.330827	-1.80945	-1.85253	-0.502542	-1.7798	-0.318084	0.165697	-0.603485	-0.329862	-0.165392	-1.03684	0.0282637	0.250858	0.111235	0.0317056	0.108314	0.339376
253827	MSRB3	-0.336249	0.104111	-3.22973	0.00123906	0.034647	0	0.833005	0.974881	-2.61157	-0.583669	-0.866878	-1.34964	-1.19654	-0.313817	-0.441576	-0.2934	-0.284232	-0.239555	-0.396897	-0.175645	0.0285894	0.25269	0.107506	0.0315047	0.110027	0.313271
55764	IFT122	-0.336545	0.104233	-3.22878	0.00124321	0.034647	0	2.7548	0.737726	-2.91721	-0.90772	0.24514	-1.57275	-0.80504	-0.814856	-0.494743	-0.459819	0.0800099	-0.279516	-0.265643	-0.459347	0.0287623	0.256607	0.106527	0.0315857	0.108883	0.317775
3936	LCP1	-0.340881	0.105582	-3.2286	0.00124399	0.034647	1.10244	5.05574	0.409116	-1.96473	1.13277	-0.517623	-2.33194	-2.16088	-0.478615	-0.330469	0.578096	-0.169176	-0.416886	-0.732859	-0.268324	0.0282916	0.260444	0.106819	0.0319594	0.115021	0.3143
4542	MYO1F	-0.336076	0.10415	-3.22685	0.0012516	0.034649	0	1.79227	0.877076	-2.23618	0.300541	-0.68049	-1.68139	-1.64583	-1.05599	-0.376885	0.150483	-0.222693	-0.299032	-0.550663	-0.59872	0.0284056	0.250708	0.107095	0.0316298	0.111944	0.321462
32	ACACB	0.336221	0.104196	3.22681	0.00125177	0.034649	0	1.99895	0.849291	1.36682	0.920065	1.20531	2.8373	0.38199	0.218184	0.2291	0.466241	0.397051	0.509894	0.125629	0.122041	0.0280946	0.256793	0.108517	0.0322961	0.108162	0.312872
683	BST1	-0.335628	0.104072	-3.22494	0.00125997	0.034769	0	0.639825	0.986107	-2.1293	-0.191903	-1.04503	-1.57734	-1.38836	-0.980671	-0.358575	-0.0960068	-0.343425	-0.280339	-0.462062	-0.554923	0.0283588	0.250288	0.107994	0.0315875	0.110764	0.320199
7040	TGFB1	-0.336199	0.104293	-3.22361	0.00126586	0.0348248	0	3.54895	0.615994	-2.09226	0.582012	-0.217164	-2.12559	-2.10629	-0.471764	-0.352241	0.292558	-0.070873	-0.3793	-0.713181	-0.264461	0.0283432	0.252675	0.106509	0.0318425	0.114647	0.314248
9236	CCPG1	-0.335754	0.104243	-3.22089	0.00127794	0.0350498	0	2.94621	0.708279	-2.91193	-0.476607	0.352893	-1.8049	-0.745009	-0.822556	-0.49382	-0.239154	0.115228	-0.321271	-0.245682	-0.463762	0.0287591	0.251787	0.106617	0.0316837	0.108749	0.317877
55274	PHF10	0.335759	0.10428	3.21977	0.00128293	0.0350797	0	3.37529	0.642336	1.20972	0.476235	2.07051	2.2104	1.64378	-0.42086	0.202623	0.238966	0.695412	0.394723	0.549954	-0.235791	0.0280549	0.251785	0.112806	0.0318892	0.111934	0.31389
59352	LGR6	0.335578	0.104326	3.21664	0.00129703	0.0353579	0	4.29312	0.50803	1.68647	1.48028	1.90997	1.70049	1.45739	-0.969982	0.28316	0.76686	0.638653	0.302466	0.485682	-0.548728	0.0281908	0.268377	0.111809	0.0316379	0.111058	0.320028
4671	NAIP	-0.335584	0.104363	-3.21556	0.00130189	0.0353809	0	4.60744	0.465638	-3.09429	0.120648	0.14908	-1.18594	-1.91145	-0.525126	-0.525777	0.0603379	0.0486454	-0.210327	-0.643699	-0.294572	0.0288723	0.250114	0.106474	0.0314533	0.113407	0.314669
54834	GDAP2	-0.334718	0.10412	-3.21471	0.00130574	0.0353809	0	1.28405	0.936564	-1.48954	-0.123203	-1.78245	-2.12696	-0.989483	-0.839287	-0.249821	-0.0616161	-0.594083	-0.379549	-0.327223	-0.473362	0.0281291	0.250119	0.111086	0.0318433	0.109363	0.318102
6732	SRPK1	-0.334354	0.104055	-3.21325	0.00131244	0.0354211	0	0.311769	0.997416	-1.6444	-0.74534	-1.02346	-1.95357	-1.39692	-0.74954	-0.27603	-0.375948	-0.336235	-0.34812	-0.464987	-0.421979	0.0281769	0.254417	0.10793	0.0317539	0.110799	0.316952
54518	APBB1IP	-0.334911	0.10425	-3.21258	0.00131551	0.0354211	0	2.93022	0.710744	-1.718	0.806863	-1.23412	-2.65281	-0.945002	-0.441359	-0.288509	0.407599	-0.406735	-0.47577	-0.312334	-0.24733	0.0282014	0.255192	0.108619	0.0321648	0.109238	0.314029
27238	GPKOW	-0.384586	0.119769	-3.21108	0.00132238	0.0354211	14.0094	5.81459	0.324681	-3.3657	0.521517	-0.571065	-1.36638	-2.44683	-0.270379	-0.573704	0.261874	-0.186714	-0.242549	-0.837609	-0.151285	0.0290552	0.252143	0.106901	0.0315104	0.117186	0.313072
375341	C3orf62	-0.334273	0.104128	-3.21021	0.00132636	0.0354211	0	1.20365	0.944527	-2.4015	0.283849	-0.978608	-1.99262	-0.761953	-0.390657	-0.405296	0.142103	-0.321307	-0.355185	-0.251312	-0.218802	0.0284828	0.250631	0.107801	0.0317733	0.108786	0.313697
84243	ZDHHC18	-0.334441	0.104186	-3.21004	0.00132716	0.0354211	0	2.86239	0.721192	-1.64942	-0.0927053	-1.44008	-2.41585	-0.0633256	-1.58852	-0.276879	-0.0463589	-0.476378	-0.432231	-0.0208071	-0.917417	0.0281786	0.250067	0.109429	0.0320103	0.10796	0.333541
126308	MOB3A	-0.334143	0.104119	-3.20924	0.00133085	0.0354211	0	1.17957	0.946823	-1.90704	0.145178	-1.58202	-2.11113	-0.665147	-0.647193	-0.32064	0.0726129	-0.524858	-0.376673	-0.219183	-0.363701	0.0282694	0.250165	0.110067	0.0318348	0.108587	0.315807
6102	RP2	-0.334119	0.10416	-3.20775	0.00133776	0.0355	0	1.96195	0.854385	-2.64226	-0.623625	-0.228884	-1.21998	-1.57891	-0.920594	-0.446893	-0.313724	-0.0747004	-0.216399	-0.527496	-0.520167	0.0286058	0.253076	0.106516	0.0314635	0.111616	0.319264
51291	GMIP	-0.334194	0.104332	-3.20317	0.00135926	0.0359644	0	4.21038	0.519541	-2.05483	0.852513	-1.73722	-2.22772	-1.12902	0.515945	-0.345845	0.431181	-0.578377	-0.397876	-0.374105	0.289386	0.0283277	0.25581	0.110844	0.0318989	0.109796	0.314594
10288	LILRB2	-0.333328	0.104176	-3.19965	0.00137594	0.036299	0	2.14546	0.828674	-1.40484	-1.2649	-0.146444	-2.62882	-1.0814	-0.84149	-0.235515	-0.64888	-0.047785	-0.471347	-0.358076	-0.474627	0.028105	0.263158	0.106473	0.0321484	0.109642	0.318132
57568	SIPA1L2	-0.333211	0.104274	-3.19552	0.00139579	0.0365653	0	4.34011	0.501557	-2.39142	1.0077	-0.613697	-1.84364	-1.10189	-1.68147	-0.403561	0.512042	-0.20072	-0.328258	-0.364967	-0.975063	0.0284779	0.258193	0.106973	0.0317015	0.109707	0.336269
8613	PLPP3	-0.333113	0.104254	-3.1952	0.00139732	0.0365653	0	3.21215	0.667316	-2.28554	-0.472466	0.202328	-2.70963	-0.104764	-0.761958	-0.385356	-0.237061	0.0660284	-0.486256	-0.0344243	-0.429073	0.028428	0.251756	0.1065	0.0322042	0.10797	0.317103
5271	SERPINB8	-0.332562	0.104101	-3.1946	0.00140025	0.0365653	0	0.892856	0.970737	-1.85633	-1.10003	-0.82143	-1.9291	-1.42836	0.0770574	-0.312009	-0.560717	-0.269193	-0.343693	-0.475737	0.0430796	0.0282504	0.259825	0.107396	0.031742	0.110933	0.312546
7096	TLR1	-0.332345	0.104047	-3.19418	0.0014023	0.0365653	0	0.418248	0.994812	-2.00555	-0.386752	-0.590731	-2.04948	-1.0064	-0.941829	-0.337432	-0.19383	-0.193173	-0.365488	-0.332892	-0.532435	0.0283077	0.251174	0.106934	0.0318023	0.109413	0.319587
64115	VSIR	-0.332851	0.104294	-3.19148	0.00141545	0.0368017	0	3.65306	0.600365	-2.02757	-0.511275	0.473518	-2.94917	-0.611702	-0.412528	-0.34119	-0.256688	0.154716	-0.530692	-0.20148	-0.231103	0.0283166	0.252059	0.106758	0.0323807	0.108489	0.313835
159013	CXorf38	-0.732606	0.22985	-3.18732	0.00143599	0.0372187	70.7207	17.0769	0.00435625	-4.99812	-2.16855	1.15726	-6.03039	-2.67271	-1.0497	-0.873792	-1.17396	0.380935	-1.15147	-0.922586	-0.595052	0.0305635	0.293068	0.108352	0.0364598	0.119154	0.321352
5862	RAB2A	-0.331848	0.10414	-3.18656	0.00143976	0.0372187	0	1.45715	0.917961	-2.45843	-0.124361	-0.739243	-2.20948	-0.346764	-0.0588458	-0.415108	-0.0621953	-0.242054	-0.394555	-0.114025	-0.0328972	0.0285107	0.250121	0.107213	0.0318886	0.108126	0.312527
196527	ANO6	-0.331554	0.104123	-3.18426	0.00145123	0.0373579	0	1.46226	0.917383	-1.3923	-0.460422	-1.3669	-2.59565	-0.425293	-0.815234	-0.233398	-0.230977	-0.451544	-0.465238	-0.139903	-0.459564	0.0281015	0.251667	0.109125	0.032126	0.108212	0.31778
84188	FAR1	-0.331792	0.104212	-3.18382	0.00145345	0.0373579	0	2.92516	0.711523	-2.43943	-0.438638	-2.14498	-0.869338	-0.697844	-1.0368	-0.411833	-0.219982	-0.722008	-0.153981	-0.230025	-0.587536	0.0285013	0.251512	0.113302	0.0313732	0.108651	0.32113
4353	MPO	-0.331575	0.104302	-3.179	0.00147784	0.0375443	0	4.1	0.53511	-1.91181	-1.00045	0.609743	-2.83409	-0.518618	-0.936658	-0.321452	-0.508236	0.19942	-0.509299	-0.170702	-0.529446	0.0282712	0.258072	0.106966	0.0322938	0.108338	0.319508
10087	COL4A3BP	-0.331501	0.104303	-3.17827	0.00148157	0.0375443	0	4.15914	0.526739	-2.49276	-1.41972	0.608137	-1.48693	-1.62197	-0.905254	-0.421033	-0.733329	0.198893	-0.264126	-0.542393	-0.511317	0.0285279	0.266805	0.106963	0.0315531	0.111825	0.319036
23588	KLHDC2	0.374401	0.117745	3.17977	0.00147394	0.0375443	12.3672	5.70562	0.335925	3.19817	0.283491	0.0975979	3.00288	-0.46913	0.741925	0.544067	0.141924	0.0318438	0.540706	-0.154363	0.417632	0.0289402	0.250629	0.106456	0.0324226	0.108268	0.31686
6322	SCML1	0.331275	0.104169	3.18017	0.00147189	0.0375443	0	2.19622	0.821382	1.61484	-0.382157	0.727589	2.7329	0.872227	0.892782	0.27102	-0.191516	0.238211	0.490558	0.288028	0.504129	0.0281674	0.251146	0.107189	0.0322206	0.109046	0.318854
1175	AP2S1	0.459854	0.144579	3.18064	0.00146952	0.0375443	33.7463	7.54675	0.183048	4.3357	2.26925	0.177009	2.17208	0.389835	0.523345	0.749229	1.23866	0.0577622	0.38775	0.128214	0.293566	0.0298615	0.297946	0.106486	0.0318679	0.108171	0.314655
22919	MAPRE1	-0.330605	0.104107	-3.17562	0.00149514	0.0377817	0	1.6065	0.900463	-1.35139	-0.815946	-1.19947	-1.70207	-1.88273	-1.14831	-0.226496	-0.412284	-0.39509	-0.302752	-0.63355	-0.652773	0.0280905	0.255312	0.108496	0.0316386	0.113236	0.323153
55840	EAF2	-0.330073	0.104062	-3.1719	0.00151446	0.0381626	0	0.523988	0.991219	-2.07158	-0.843318	-0.365523	-2.06101	-0.991235	-0.467349	-0.348706	-0.426424	-0.119359	-0.367578	-0.32781	-0.261972	0.0283346	0.255682	0.10663	0.0318083	0.109368	0.314216
7905	REEP5	-0.330116	0.104123	-3.17046	0.00152198	0.0382215	0	1.33931	0.930836	-1.90266	-0.771192	-0.715759	-2.55277	-0.187857	-0.334721	-0.319895	-0.38923	-0.234311	-0.457349	-0.0617376	-0.187377	0.0282677	0.254734	0.107165	0.0320976	0.108005	0.313378
56255	TMX4	-0.330875	0.104383	-3.16983	0.00152529	0.0382215	0	4.99009	0.417091	-1.61751	-1.31181	-0.688946	-3.14707	0.545081	-0.157747	-0.271474	-0.674284	-0.225478	-0.567691	0.179445	-0.0882108	0.0281683	0.264208	0.107112	0.0325394	0.108378	0.312695
3101	HK3	-0.329628	0.104111	-3.16612	0.00154486	0.0385941	0	1.69319	0.889756	-1.96457	-0.142018	-0.337927	-1.79118	-1.80239	-1.12548	-0.330442	-0.0710314	-0.110333	-0.318798	-0.605278	-0.639365	0.0282915	0.250158	0.106603	0.0316775	0.112775	0.32272
54539	NDUFB11	0.329986	0.104248	3.16539	0.00154874	0.0385941	0	4.3909	0.494612	2.25945	0.191343	-0.511869	2.08855	1.07367	1.86872	0.380876	0.0957262	-0.167289	0.372575	0.355476	1.09346	0.0284161	0.250286	0.106811	0.0318228	0.109617	0.342392
64092	SAMSN1	-0.329212	0.104112	-3.16209	0.00156642	0.0389268	0	2.02392	0.845825	-1.10084	-0.839797	-0.950611	-2.45673	-0.962912	-1.49641	-0.184305	-0.424603	-0.312002	-0.439719	-0.318326	-0.860965	0.0280303	0.255634	0.107723	0.0320358	0.109288	0.331032
639	PRDM1	-0.329679	0.10431	-3.16057	0.00157462	0.0390229	0	4.53642	0.475025	-1.80551	-0.710784	-0.0772527	-3.02808	0.339697	-1.2124	-0.303369	-0.358231	-0.0252051	-0.545412	0.111697	-0.690557	0.0282319	0.25401	0.106451	0.0324426	0.108119	0.324422
9748	SLK	-0.3422	0.108454	-3.15524	0.00160365	0.0395721	3.8395	5.19964	0.392005	-2.56513	0.184335	0.7989	-2.77475	-0.981069	-0.62707	-0.433538	0.0922165	0.261747	-0.498301	-0.324405	-0.352278	0.028565	0.250266	0.107344	0.0322505	0.109339	0.315603
3799	KIF5B	-0.328459	0.104111	-3.15489	0.00160558	0.0395721	0	1.31532	0.933348	-2.15574	-0.953159	-0.891433	-1.35368	-1.75648	-0.0249854	-0.363101	-0.483492	-0.292367	-0.240277	-0.589199	-0.0139674	0.0283702	0.257305	0.107567	0.0315061	0.112522	0.312505
29992	PILRA	-0.328947	0.104323	-3.15317	0.0016151	0.0395898	0	4.25529	0.513276	-1.70127	-0.751358	0.179968	-3.21476	-0.570731	0.214614	-0.28567	-0.379037	0.0587282	-0.580409	-0.187925	0.120042	0.0281957	0.25449	0.106488	0.0325965	0.108419	0.31286
10423	CDIPT	0.328923	0.104295	3.15378	0.00161171	0.0395898	0	4.11072	0.533588	3.03427	0.528003	1.74879	0.930058	-0.187969	0.782834	0.515239	0.265159	0.58239	0.164772	-0.0617742	0.441009	0.0288342	0.252197	0.110905	0.0313866	0.108005	0.317362
7156	TOP3A	-0.328274	0.104293	-3.14762	0.00164603	0.0402384	0	3.94623	0.557184	-1.19149	0.190908	-1.2622	-3.06126	-1.1207	0.420941	-0.199555	0.0955086	-0.416186	-0.551615	-0.371305	0.235836	0.0280507	0.250285	0.108722	0.0324691	0.109769	0.31389
79102	RNF26	0.32904	0.104608	3.14547	0.00165822	0.0404265	0.241553	5.01211	0.414404	2.88444	1.26009	0.870917	1.65027	-0.900138	0.875703	0.489019	0.646286	0.28557	0.293436	-0.297343	0.494294	0.0287427	0.263053	0.107516	0.0316169	0.109118	0.318608
10209	EIF1	0.32812	0.104342	3.14466	0.00166278	0.040428	0	4.79294	0.441669	3.18429	0.191463	0.478021	0.501638	1.92024	0.5814	0.541619	0.0957865	0.156192	0.0887649	0.646808	0.326394	0.028931	0.250287	0.106764	0.0313113	0.113459	0.315163
7171	TPM4	-0.327079	0.104086	-3.14239	0.00167574	0.0406332	0	2.20017	0.820812	-1.58031	-0.6592	-1.19546	-2.02112	-0.436251	-1.85432	-0.265175	-0.331861	-0.393743	-0.360349	-0.143516	-1.08424	0.0281565	0.253442	0.108482	0.0317878	0.108226	0.34189
84106	PRAM1	-0.395833	0.126062	-3.13999	0.00168951	0.0408332	19.4188	6.20492	0.286787	-2.90562	0.427015	-0.134164	-2.74591	-2.40158	0.49673	-0.492717	0.214118	-0.0437768	-0.492964	-0.820833	0.278541	0.0287553	0.251433	0.106468	0.0322298	0.11682	0.31444
152007	GLIPR2	-0.327125	0.104201	-3.13938	0.00169306	0.0408332	0	2.68247	0.748798	-1.98103	0.327515	-2.01152	-1.73207	-1.19423	0.184287	-0.333249	0.164033	-0.674468	-0.308151	-0.396114	0.103064	0.028298	0.250841	0.112428	0.0316515	0.110019	0.312766
121512	FGD4	-0.327016	0.104222	-3.13768	0.00170294	0.0409615	0	3.56405	0.613719	-1.60852	-2.11489	-0.268467	-1.72565	-1.25356	-1.31439	-0.269951	-1.14012	-0.0876303	-0.306994	-0.4162	-0.751164	0.0281654	0.290621	0.106544	0.0316487	0.110234	0.326606
3309	HSPA5	-0.510315	0.162761	-3.13537	0.00171637	0.0411633	45.3122	9.14281	0.103502	-3.43904	-1.19545	-0.397182	-0.927867	-2.99077	-2.14895	-0.586734	-0.611535	-0.129717	-0.164382	-1.04615	-1.27729	0.0291077	0.261687	0.106664	0.0313861	0.122355	0.353287
90637	ZFAND2A	-0.326363	0.104114	-3.13467	0.00172047	0.0411633	0	1.88213	0.865202	-2.25832	-1.05233	-0.00109107	-1.98679	-0.484822	-1.14825	-0.380684	-0.535512	-0.000355966	-0.354131	-0.159542	-0.65274	0.0284156	0.258962	0.106443	0.0317704	0.108289	0.323152
80145	THOC7	0.326033	0.104256	3.12723	0.0017646	0.0421071	0	3.49692	0.623853	2.20814	1.20985	0.355696	2.58676	-0.142569	-0.314201	0.372077	0.619253	0.116145	0.463601	-0.0468493	-0.175861	0.0283931	0.261984	0.10662	0.0321201	0.107983	0.313273
5580	PRKCD	-0.325882	0.10427	-3.12537	0.00177581	0.0421964	0	3.8788	0.566995	-2.09132	0.350625	-0.351911	-1.62838	-2.48924	-0.422362	-0.352081	0.17565	-0.114906	-0.289504	-0.853404	-0.236636	0.0283428	0.250964	0.106616	0.0316079	0.117537	0.3139
81553	FAM49A	-0.326082	0.104347	-3.12496	0.00177827	0.0421964	0	4.99594	0.416376	-1.26235	-0.53489	-2.33925	-2.59188	-0.414724	0.720922	-0.211487	-0.268649	-0.792249	-0.464544	-0.136418	0.405651	0.0280677	0.252255	0.114701	0.0321235	0.108199	0.316614
6904	TBCD	-0.325473	0.104175	-3.12428	0.00178242	0.0421964	0	2.80014	0.730766	-2.35886	-1.4778	0.20968	-1.47531	-1.18331	-1.09198	-0.397958	-0.765481	0.068429	-0.262044	-0.392426	-0.619744	0.0284623	0.268311	0.106504	0.0315488	0.109981	0.322102
14	AAMP	0.325354	0.104227	3.1216	0.00179872	0.0424705	0	3.53188	0.618569	3.14467	0.99463	0.208949	0.947758	0.523217	1.08738	0.534638	0.505185	0.0681904	0.167918	0.172221	0.61705	0.0289049	0.257975	0.106504	0.0313907	0.108345	0.322019
5595	MAPK3	-0.325534	0.104337	-3.12004	0.00180829	0.0425849	0	4.95486	0.421414	-1.5337	-0.884051	0.0699775	-2.9082	-1.53209	0.863644	-0.257288	-0.447524	0.0228313	-0.523066	-0.511347	0.487357	0.0281422	0.256259	0.106449	0.0323493	0.111395	0.318438
55718	POLR3E	0.324319	0.104158	3.11371	0.0018475	0.0433945	0	2.19952	0.820906	2.92052	0.748252	0.624408	1.4778	0.436127	-0.203533	0.495321	0.377442	0.204241	0.262489	0.143475	-0.113837	0.0287643	0.254452	0.106991	0.0315497	0.108225	0.312824
10217	CTDSPL	-0.324446	0.104289	-3.11102	0.0018644	0.0436776	0	4.23251	0.516449	-2.93215	-0.653867	0.628274	-1.97804	-0.262619	-0.713864	-0.497354	-0.32914	0.205512	-0.352547	-0.0863263	-0.401629	0.0287713	0.253385	0.106998	0.0317661	0.108053	0.316533
10248	POP7	0.342281	0.110204	3.1059	0.001897	0.0443257	5.48811	5.29034	0.381484	3.02055	-0.601582	1.05898	2.4068	-0.02699	-0.512362	0.512832	-0.302507	0.348075	0.430573	-0.00886801	-0.287363	0.0288256	0.25286	0.108037	0.0320047	0.107956	0.314564
11275	KLHL2	-0.32346	0.104181	-3.10479	0.00190414	0.0443773	0	3.98754	0.551212	-2.59031	-0.2669	0.0873932	-1.4687	-0.846382	-1.9913	-0.437893	-0.133599	0.0285139	-0.260859	-0.279411	-1.17282	0.0285782	0.250558	0.106453	0.0315464	0.108982	0.346888
63971	KIF13A	-0.323241	0.104185	-3.10255	0.00191858	0.0445288	0	2.827	0.726636	-1.95613	-1.27181	-0.538166	-1.70697	-1.85333	0.608868	-0.329004	-0.65261	-0.175915	-0.303632	-0.623183	0.341956	0.0282882	0.263309	0.10685	0.0316407	0.113065	0.315423
81602	CDADC1	-0.322726	0.104043	-3.10187	0.00192304	0.0445288	0	1.34734	0.929986	-2.02435	-0.87501	-0.338174	-1.85286	-0.692841	-1.44146	-0.34064	-0.442835	-0.110414	-0.329922	-0.228365	-0.827583	0.0283153	0.256128	0.106603	0.0317057	0.108641	0.329622
128346	C1orf162	-0.32305	0.104159	-3.10149	0.00192549	0.0445288	0	2.36052	0.797339	-2.01811	-0.398997	0.0622639	-2.70281	-0.376001	-0.545334	-0.339575	-0.199997	0.0203144	-0.484997	-0.123656	-0.305991	0.0283128	0.25125	0.106448	0.0321994	0.108156	0.314841
26578	OSTF1	-0.344238	0.111052	-3.0998	0.00193649	0.0446683	6.19202	5.33004	0.376943	-2.52396	-2.28828	-0.123933	-1.88807	-0.913207	0.594253	-0.42642	-1.25107	-0.0404379	-0.336279	-0.301707	0.333674	0.0285438	0.298912	0.106464	0.0317223	0.109152	0.315283
85450	ITPRIP	-0.322382	0.104087	-3.09724	0.00195332	0.0447126	0	1.27296	0.937689	-1.44079	-0.548224	-0.869988	-2.57468	-1.04849	0.0652295	-0.241585	-0.275408	-0.285262	-0.461378	-0.347015	0.0364663	0.028115	0.25237	0.107513	0.0321121	0.109539	0.312533
59286	UBL5	0.32276	0.104195	3.09765	0.00195061	0.0447126	0	2.80536	0.729963	2.26263	1.31773	-0.0765066	2.33451	0.151411	0.257204	0.381423	0.677505	-0.0249616	0.417355	0.0497557	0.1439	0.0284175	0.264344	0.106451	0.031961	0.107987	0.313018
1032	CDKN2D	0.337393	0.108881	3.09874	0.00194346	0.0447126	4.23241	5.22097	0.389512	2.2713	1.33785	0.922958	2.70832	-0.899395	0.0573994	0.382912	0.688456	0.302822	0.486015	-0.297094	0.0320886	0.0284215	0.264812	0.107649	0.0322032	0.109116	0.312526
825	CAPN3	-0.322384	0.104132	-3.09592	0.00196203	0.0447981	0	2.40099	0.791327	-2.07529	-0.515774	0.301141	-2.32727	-0.732561	-1.17018	-0.349341	-0.258966	0.0983076	-0.416032	-0.241548	-0.665645	0.0283361	0.252096	0.10657	0.0319567	0.108722	0.323577
138050	HGSNAT	-0.321755	0.104001	-3.09376	0.00197636	0.045011	0	0.133466	0.99967	-1.82643	-0.807206	-1.13575	-1.90677	-0.790375	-0.408668	-0.306924	-0.407776	-0.373729	-0.339658	-0.260763	-0.228931	0.0282395	0.255196	0.10828	0.0317312	0.108849	0.31381
85865	GTPBP10	0.321476	0.10409	3.08843	0.00201214	0.0457102	0	1.50207	0.912831	1.60287	1.76819	1.14658	1.62607	1.01965	0.588528	0.268994	0.930732	0.377355	0.289088	0.337336	0.330431	0.0281636	0.277071	0.108316	0.031607	0.109452	0.31523
1192	CLIC1	-0.321067	0.104044	-3.08588	0.00202947	0.045925	0	0.773157	0.978714	-2.13591	-0.46118	-0.278652	-2.15548	-0.807644	-0.380846	-0.359706	-0.23136	-0.0909582	-0.384732	-0.266509	-0.213286	0.0283617	0.251673	0.106551	0.0318587	0.108889	0.313637
10404	CPQ	-0.325079	0.105356	-3.08554	0.00203181	0.045925	0.956063	5.04826	0.410018	-1.95581	-0.169305	0.468719	-3.25584	-0.353213	-0.193647	-0.328949	-0.0846905	0.153144	-0.588144	-0.116148	-0.108303	0.0282881	0.250224	0.106751	0.0326318	0.108132	0.312793
3687	ITGAX	-0.321325	0.104232	-3.08279	0.00205071	0.0461586	0	3.57113	0.612653	-1.75668	-0.208608	0.216196	-3.03883	-0.408073	-0.705378	-0.295073	-0.104375	0.0705567	-0.54742	-0.134225	-0.396794	0.0282147	0.25034	0.106508	0.0324511	0.108192	0.316436
4973	OLR1	-0.320785	0.104065	-3.08254	0.00205241	0.0461586	0	1.31418	0.933465	-1.75673	-0.364369	-1.80431	-1.87773	-0.324502	-0.843028	-0.295083	-0.182564	-0.601693	-0.334411	-0.106694	-0.47551	0.0282147	0.251042	0.111206	0.0317174	0.108104	0.318153
54432	YIPF1	-0.32028	0.104171	-3.07456	0.00210811	0.0472162	0	2.96269	0.705738	-2.40988	-0.257492	0.422024	-1.69206	-1.62117	-0.934036	-0.406741	-0.12888	0.137849	-0.30095	-0.542116	-0.527931	0.0284868	0.250519	0.106693	0.0316343	0.111822	0.319468
103	ADAR	-0.320244	0.10417	-3.07426	0.00211027	0.0472162	0	2.92692	0.711251	-1.89963	-0.584513	-1.1182	-1.71618	-1.86464	0.86903	-0.319378	-0.293829	-0.367859	-0.30529	-0.627167	0.490455	0.0282666	0.252698	0.108223	0.0316446	0.11313	0.318514
10100	TSPAN2	-0.319693	0.104036	-3.07291	0.00211986	0.0472162	0	0.706519	0.982609	-1.54524	-1.12177	-0.967116	-2.08729	-1.09635	-0.0951439	-0.25924	-0.57225	-0.317486	-0.372347	-0.363105	-0.0531931	0.0281457	0.260233	0.107769	0.0318221	0.109689	0.312571
23762	OSBP2	-0.516295	0.168025	-3.07273	0.00212113	0.0472162	48.0118	9.61757	0.0868253	-3.0195	-0.879011	0.239526	-2.78833	-3.8729	-0.475196	-0.512648	-0.44491	0.078176	-0.500817	-1.42035	-0.266396	0.0288249	0.256186	0.106523	0.0322603	0.134499	0.314274
7035	TFPI	-0.320003	0.104165	-3.07209	0.00212567	0.0472162	0	2.69814	0.746402	-2.66751	-0.871806	0.396993	-1.80472	-0.611946	-0.686373	-0.451271	-0.441174	0.129655	-0.321238	-0.201561	-0.385974	0.0286195	0.256082	0.106664	0.0316836	0.108489	0.316224
7378	UPP1	-0.319367	0.104073	-3.06869	0.00215003	0.0475501	0	2.37325	0.795451	-2.28444	0.000991635	-0.759109	-1.27469	-1.13222	-1.7574	-0.385166	0.000495818	-0.248608	-0.226164	-0.375183	-1.02269	0.0284275	0.25	0.107256	0.0314804	0.109807	0.338647
55529	PIP4P2	-0.319935	0.104275	-3.06819	0.00215356	0.0475501	0	4.16132	0.526432	-2.39102	0.670582	0.306286	-2.50088	-0.965882	-0.35685	-0.403492	0.337672	0.0999891	-0.447818	-0.31932	-0.199804	0.0284777	0.253563	0.106574	0.0320639	0.109296	0.313498
54788	DNAJB12	-0.319016	0.104026	-3.0667	0.00216438	0.0475501	0	0.930088	0.968005	-1.29618	-0.934791	-1.01882	-1.88536	-1.53113	-0.918628	-0.217187	-0.473911	-0.33469	-0.335789	-0.511019	-0.519033	0.0280762	0.257018	0.107916	0.031721	0.111391	0.319235
3475	IFRD1	-0.319184	0.104128	-3.06531	0.00217444	0.0475501	0	3.82809	0.574423	-1.0105	-0.860376	-1.10925	-2.08351	-0.964779	-2.22725	-0.169124	-0.435252	-0.364863	-0.371661	-0.318951	-1.33029	0.0280117	0.25592	0.108194	0.0318201	0.109293	0.356742
976	ADGRE5	-0.319653	0.104304	-3.06462	0.00217947	0.0475501	0	4.60328	0.466185	-2.27285	0.570969	0.318193	-2.34153	-1.70574	0.0990213	-0.383176	0.28695	0.103881	-0.418637	-0.571491	0.0553614	0.0284222	0.252573	0.106585	0.0319651	0.112252	0.312577
83463	MXD3	-0.319101	0.104157	-3.06366	0.00218645	0.0475501	0	3.71042	0.591815	-2.25481	-0.226616	-0.441238	-0.984069	-1.87688	-1.80974	-0.380081	-0.113399	-0.144141	-0.174376	-0.631485	-1.05582	0.028414	0.250402	0.106716	0.0313993	0.113202	0.340369
57419	SLC24A3	-0.352142	0.114945	-3.06356	0.00218717	0.0475501	9.84388	5.54594	0.352935	-2.61606	-0.605887	-0.271404	-0.769774	-2.25096	-1.88254	-0.442352	-0.304696	-0.0885899	-0.136303	-0.765544	-1.10234	0.0285918	0.252901	0.106546	0.0313531	0.115666	0.342879
3588	IL10RB	-0.319182	0.10422	-3.06258	0.00219435	0.0475501	0	3.62404	0.604707	-2.60804	0.284787	0.475837	-1.93834	-1.22572	-0.796542	-0.440964	0.142574	0.155476	-0.345365	-0.406768	-0.448855	0.0285876	0.250635	0.106761	0.0317465	0.110132	0.317537
8993	PGLYRP1	-0.318744	0.104098	-3.06195	0.00219903	0.0475501	0	1.87614	0.866004	-2.45456	-0.711352	0.0544621	-1.98394	-0.348462	-0.812633	-0.414441	-0.358522	0.0177689	-0.353614	-0.114584	-0.458072	0.0285088	0.254017	0.106447	0.031769	0.108127	0.317746
25912	C1orf43	0.319057	0.104224	3.06125	0.00220413	0.0475501	0	3.64249	0.601946	1.44564	0.285259	1.25374	2.89958	0.52989	-0.763107	0.242403	0.142811	0.413335	0.521462	0.174425	-0.42973	0.0281164	0.250637	0.108691	0.0323427	0.108355	0.317117
29104	N6AMT1	0.318694	0.104079	3.06205	0.00219828	0.0475501	0	1.59601	0.901731	1.40612	0.498224	0.892111	2.67772	0.303167	0.82994	0.235732	0.250084	0.292592	0.480364	0.09967	0.467997	0.0281053	0.251954	0.107569	0.0321819	0.108085	0.317976
10771	ZMYND11	0.319493	0.104277	3.06389	0.00218476	0.0475501	0	4.23179	0.516549	1.90969	-0.618088	-0.194392	2.55734	1.71719	0.252589	0.321092	-0.310906	-0.0634373	0.458189	0.575481	0.141314	0.0282704	0.253021	0.106496	0.0321006	0.112312	0.312999
9938	ARHGAP25	-0.318222	0.103992	-3.06007	0.00221287	0.0476245	0	0.275761	0.998074	-1.91295	-0.923811	-1.29572	-1.57817	-0.783853	-0.585667	-0.321647	-0.468191	-0.427485	-0.280488	-0.258594	-0.32881	0.0282716	0.25685	0.108847	0.0315879	0.108834	0.315203
254065	BRWD3	-0.318049	0.104021	-3.05755	0.00223154	0.0478551	0	0.628194	0.986676	-1.66198	-0.0856713	-1.04949	-2.11525	-1.24213	-0.297835	-0.279008	-0.0428406	-0.34491	-0.377422	-0.412325	-0.16668	0.0281827	0.250057	0.108008	0.031837	0.110192	0.313195
205717	USF3	-0.318486	0.104176	-3.05719	0.00223423	0.0478551	0	2.84893	0.723263	-2.16753	-1.13652	0.120333	-1.64583	-1.86348	0.0983527	-0.36512	-0.580089	0.0392629	-0.292639	-0.626758	0.0549875	0.0283753	0.260516	0.106463	0.0316151	0.113123	0.312576
9764	KIAA0513	-0.318409	0.104183	-3.05626	0.00224119	0.0478901	0	3.3761	0.642213	-1.97325	-0.0815598	0.418956	-2.02412	-1.8254	-1.10079	-0.331923	-0.0407842	0.136845	-0.360892	-0.613358	-0.624899	0.0282949	0.250052	0.106689	0.0317893	0.112905	0.322262
145864	HAPLN3	0.318141	0.104136	3.05505	0.00225022	0.0479692	0	2.45169	0.783753	2.50031	0.686517	-0.101365	2.09065	0.102058	0.818922	0.422336	0.345815	-0.0330733	0.372957	0.0335349	0.461678	0.0285317	0.253737	0.106457	0.0318239	0.107969	0.317829
1520	CTSS	-0.31791	0.104089	-3.0542	0.00225659	0.0479912	0	1.66834	0.892864	-1.65322	-0.222185	-1.43108	-1.9666	-1.46387	0.394415	-0.277523	-0.111178	-0.473319	-0.350476	-0.487904	0.220914	0.0281798	0.250386	0.10939	0.0317604	0.111087	0.31372
115727	RASGRP4	-0.318242	0.104234	-3.05314	0.00226457	0.0480238	0	3.83045	0.574076	-2.5679	0.0166194	0.490991	-1.62393	-1.81868	-0.609874	-0.434016	0.00830974	0.160443	-0.288705	-0.610997	-0.342526	0.0285664	0.250002	0.106781	0.0316061	0.112867	0.315433
6210	RPS15A	0.318099	0.104206	3.05258	0.0022688	0.0480238	0	3.91346	0.561942	2.26519	-0.442966	-0.105104	2.41508	0.376733	1.38522	0.381862	-0.222165	-0.0342933	0.432089	0.123897	0.79363	0.0284187	0.251542	0.106458	0.0320098	0.108157	0.328246
5476	CTSA	-0.317925	0.104187	-3.05149	0.00227707	0.0480857	0	3.09758	0.684945	-2.10942	0.285068	0.171524	-2.07216	-1.83392	-0.437862	-0.355176	0.142716	0.0559714	-0.369601	-0.616353	-0.245361	0.0283504	0.250636	0.106484	0.0318142	0.112953	0.314005
9980	DOPEY2	-0.317699	0.104141	-3.05066	0.00228338	0.0481061	0	2.61966	0.758376	-2.2603	-0.334022	-1.04169	-2.10306	-0.61405	0.905887	-0.381023	-0.167303	-0.342308	-0.375209	-0.202257	0.511682	0.0284165	0.250875	0.107984	0.0318305	0.108493	0.319045
7053	TGM3	-0.317549	0.104195	-3.04765	0.00230637	0.0484769	0	3.4651	0.628675	-2.39253	0.809629	-1.21045	-1.97324	-0.0499219	-1.0061	-0.403752	0.409026	-0.398778	-0.351678	-0.0164028	-0.569679	0.0284784	0.255228	0.108535	0.0317637	0.107958	0.320613
51099	ABHD5	-0.317026	0.104085	-3.04584	0.00232031	0.048631	0	2.11961	0.832359	-2.63384	-0.229081	-0.313389	-1.13587	-1.2346	-1.2225	-0.445433	-0.114634	-0.102311	-0.201402	-0.409777	-0.696533	0.0286013	0.250411	0.10658	0.031439	0.110164	0.324629
8928	FOXH1	0.316678	0.103989	3.0453	0.00232451	0.048631	0	0.235843	0.998679	1.65725	0.849665	0.987054	1.9661	1.06166	0.272611	0.278206	0.429707	0.324116	0.350386	0.35144	0.152536	0.0281811	0.25577	0.107825	0.0317601	0.10958	0.313082
91663	MYADM	-0.317317	0.104241	-3.04406	0.0023341	0.0487183	0	3.93428	0.558916	-1.939	0.701673	-1.46765	-1.73879	-1.8936	0.430537	-0.326085	0.353567	-0.485763	-0.30936	-0.637387	0.241237	0.0282816	0.253907	0.109547	0.0316544	0.1133	0.313955
3659	IRF1	-0.316429	0.104119	-3.03911	0.00237277	0.0493212	0	2.08932	0.836653	-2.49049	0.204886	-0.98946	-1.98999	-0.329504	0.182649	-0.42064	0.10251	-0.324916	-0.354709	-0.108341	0.102147	0.0285268	0.250328	0.107832	0.031772	0.108109	0.312761
79720	VPS37B	-0.316665	0.104226	-3.03827	0.00237944	0.0493212	0	3.6706	0.597745	-1.6863	-0.0184454	0.231292	-2.44077	-2.00885	-0.106766	-0.283131	-0.00922274	0.0754867	-0.436794	-0.67829	-0.0596924	0.0281907	0.250003	0.106518	0.0320258	0.114008	0.312589
4521	NUDT1	0.316495	0.104155	3.03869	0.00237612	0.0493212	0	2.60922	0.759963	1.49167	2.09108	0.826094	1.97645	0.770019	0.25193	0.250181	1.12524	0.270736	0.352258	0.253994	0.140945	0.0281297	0.289568	0.107407	0.0317653	0.108803	0.312997
51522	TMEM14C	0.316173	0.104136	3.03617	0.00239605	0.0495514	0	2.36058	0.79733	2.35121	1.48402	0.118091	1.64277	1.04237	-0.22185	0.396643	0.768941	0.0385315	0.292089	0.344961	-0.124095	0.0284587	0.268477	0.106462	0.0316138	0.10952	0.312885
80231	CXorf21	-0.315768	0.104088	-3.03365	0.00241612	0.0498519	0	1.79694	0.876468	-2.67746	-0.713218	-1.2403	-1.20706	-0.110539	-0.56118	-0.452997	-0.359478	-0.408815	-0.214095	-0.0363221	-0.314952	0.0286249	0.254038	0.108642	0.0314596	0.107972	0.31498
23170	TTLL12	0.315723	0.10416	3.03115	0.00243622	0.0501517	0	2.73228	0.741178	2.88733	-0.263612	1.2217	1.13963	0.848018	-0.0593226	0.489524	-0.13195	0.40256	0.202072	0.279956	-0.0331638	0.0287444	0.250544	0.108575	0.0314401	0.108986	0.312527
8560	DEGS1	-0.315289	0.104092	-3.02894	0.00245412	0.0504048	0	1.82902	0.872261	-2.39299	-0.164176	-0.45538	-1.56958	-1.59068	0.221183	-0.403832	-0.0821224	-0.148773	-0.278945	-0.531566	0.12372	0.0284786	0.250211	0.106734	0.0315845	0.111672	0.312883
79572	ATP13A3	-0.314914	0.104141	-3.02392	0.00249519	0.0510152	0	3.14676	0.677372	-1.58223	-1.19881	-0.79952	-1.07351	-2.23256	-1.25471	-0.265499	-0.613338	-0.261952	-0.190293	-0.758847	-0.715626	0.0281571	0.261756	0.107345	0.031422	0.115531	0.325303
347862	GATD1	0.314927	0.104135	3.02421	0.00249283	0.0510152	0	2.43194	0.786708	2.19993	1.52049	0.069629	1.71729	1.19199	-0.226732	0.37067	0.789293	0.0227176	0.30549	0.395358	-0.126829	0.0283895	0.269468	0.106449	0.0316451	0.110011	0.312902
726	CAPN5	0.358756	0.118699	3.02241	0.00250773	0.0511555	13.2023	5.76052	0.330223	2.30148	1.36879	0.719543	3.20225	-0.773486	0.173082	0.388094	0.705358	0.235559	0.578055	-0.255146	0.096792	0.0284354	0.265548	0.107173	0.0325858	0.108811	0.312734
10162	LPCAT3	-0.354359	0.117311	-3.02067	0.00252217	0.0513336	12.0763	5.68675	0.337902	-3.24982	-0.0411817	0.380123	-1.75453	-0.794131	-1.8731	-0.553186	-0.0205914	0.124135	-0.312194	-0.262013	-1.09628	0.0289749	0.250013	0.106645	0.0316613	0.108858	0.342546
23645	PPP1R15A	-0.314526	0.104234	-3.01749	0.00254874	0.0516398	0	3.9545	0.555985	-1.78777	0.90806	-1.85629	-1.57345	-1.74462	-0.271702	-0.300354	0.459995	-0.619839	-0.279641	-0.585054	-0.152026	0.0282256	0.256612	0.111498	0.031586	0.112458	0.313078
57162	PELI1	-0.330849	0.109654	-3.0172	0.00255121	0.0516398	5.03281	5.26498	0.384405	-2.43259	-0.1686	-0.715085	-2.69564	0.938862	-1.05959	-0.410654	-0.0843374	-0.234089	-0.483674	0.310281	-0.600822	0.0284979	0.250222	0.107164	0.0321944	0.109221	0.321525
50856	CLEC4A	-0.314165	0.104138	-3.01682	0.00255444	0.0516398	0	2.49114	0.777828	-2.65523	0.0969254	-0.0688973	-2.07762	-0.423881	-0.178245	-0.44914	0.0484698	-0.0224788	-0.370592	-0.139437	-0.0996815	0.0286128	0.250073	0.106449	0.031817	0.10821	0.312748
2114	ETS2	-0.31353	0.10409	-3.0121	0.00259444	0.0523309	0	3.39486	0.639353	-1.78771	-0.0189394	-0.221566	-1.98678	-0.96255	-2.0853	-0.300344	-0.00946977	-0.0723105	-0.354129	-0.318205	-1.23476	0.0282256	0.250003	0.106511	0.0317704	0.109287	0.350616
7791	ZYX	-0.357681	0.118915	-3.00788	0.00263076	0.0529281	13.3005	5.76705	0.32955	-1.28744	0.34282	-0.503242	-2.69305	-2.78449	-0.491406	-0.215715	0.171726	-0.16446	-0.483194	-0.965457	-0.275537	0.028074	0.250922	0.106798	0.0321926	0.120219	0.314398
146223	CMTM4	-0.372621	0.123964	-3.00589	0.00264809	0.0529281	17.8511	6.08651	0.297892	-0.691152	-0.718031	-0.323586	-3.33891	-1.72557	-1.67007	-0.115567	-0.361943	-0.105645	-0.603824	-0.578405	-0.967956	0.0279588	0.254094	0.106589	0.0327048	0.112357	0.335923
57580	PREX1	-0.312771	0.104078	-3.00516	0.00265441	0.0529281	0	1.74204	0.883561	-2.0444	0.421224	-1.61775	-1.79108	-0.735315	-0.224234	-0.344063	0.211198	-0.537129	-0.318779	-0.242462	-0.12543	0.0283234	0.251394	0.110239	0.0316775	0.108728	0.312893
64859	NABP1	-0.312731	0.10409	-3.00442	0.0026609	0.0529281	0	3.02213	0.696574	-2.08637	-0.832078	0.12389	-1.86872	-0.539513	-1.7902	-0.351235	-0.420614	0.0404239	-0.332784	-0.177605	-1.04343	0.0283407	0.255529	0.106464	0.0317131	0.10837	0.339718
10398	MYL9	-0.313023	0.104205	-3.00392	0.00266523	0.0529281	0	3.55887	0.614499	-2.46084	0.639371	-0.0927625	-1.88845	-1.59303	0.0727052	-0.415525	0.321747	-0.030266	-0.336347	-0.532378	0.0406461	0.0285119	0.253235	0.106455	0.0317225	0.111684	0.312541
10576	CCT2	0.312623	0.104032	3.00507	0.00265519	0.0529281	0	1.12257	0.952087	1.74609	-0.179607	0.684728	2.36241	0.900005	0.460513	0.293276	-0.0898489	0.224088	0.422454	0.297298	0.25812	0.028211	0.250252	0.107103	0.0319777	0.109118	0.314166
11072	DUSP14	0.313478	0.104291	3.0058	0.00264884	0.0529281	0	4.98467	0.417755	2.85589	-0.947965	0.950985	0.812134	1.69043	0.737051	0.484037	-0.480781	0.312127	0.143822	0.566161	0.414851	0.0287259	0.257223	0.107724	0.0313613	0.112172	0.316803
306	ANXA3	-0.367392	0.122346	-3.00289	0.00267429	0.0529909	16.4776	5.98642	0.307543	-2.96272	-0.0861911	0.849725	-2.71132	-0.951463	-1.42999	-0.502701	-0.0431005	0.278554	-0.486569	-0.314496	-0.820638	0.0287898	0.250058	0.107464	0.0322054	0.109256	0.329336
253012	HEPACAM2	-0.312672	0.10429	-2.99809	0.00271674	0.0537139	0	4.85346	0.434025	-3.38	-0.33802	-0.0929044	-0.570847	-1.35165	-0.376714	-0.576241	-0.169312	-0.0303123	-0.101026	-0.449541	-0.210964	0.0290654	0.250896	0.106455	0.0313204	0.110614	0.313613
81704	DOCK8	-0.312028	0.104121	-2.99679	0.00272843	0.0538267	0	2.39815	0.79175	-2.20966	0.274026	-1.84362	-1.70933	-0.22487	-0.223316	-0.372337	0.137174	-0.615411	-0.304057	-0.0739087	-0.124916	0.0283938	0.250588	0.111426	0.0316417	0.108026	0.31289
4033	LRMP	-0.312202	0.104217	-2.99571	0.00273811	0.0538994	0	3.88575	0.56598	-1.54008	-1.0603	-1.24129	-2.70876	0.0466979	0.695384	-0.258367	-0.539718	-0.409147	-0.486096	0.0153435	0.391103	0.0281442	0.259103	0.108645	0.0322036	0.107958	0.316324
64097	EPB41L4A	-0.510459	0.170507	-2.99377	0.0027555	0.0541233	49.2204	9.84647	0.0797042	-1.95276	-2.66245	0.428437	-2.79124	-2.80169	-1.26407	-0.32843	-1.50879	0.139949	-0.501356	-0.972103	-0.721185	0.0282869	0.321139	0.1067	0.0322624	0.120389	0.325503
9870	AREL1	-0.31179	0.104191	-2.99249	0.00276713	0.0542333	0	3.76009	0.584447	-1.2248	-0.634695	-1.81661	-1.12127	-2.36206	-0.821852	-0.205163	-0.319364	-0.605983	-0.198801	-0.806246	-0.463358	0.0280585	0.253187	0.111274	0.0314349	0.116508	0.317868
641649	TMEM91	-0.311755	0.10421	-2.9916	0.00277515	0.0542723	0	4.19183	0.522141	-3.01727	0.218776	0.207623	-1.49556	-0.478215	-1.21707	-0.512257	0.10947	0.0677574	-0.265672	-0.157361	-0.693321	0.0288235	0.250374	0.106503	0.0315563	0.10828	0.324517
6993	DYNLT1	-0.311288	0.104106	-2.9901	0.00278888	0.0544225	0	2.18912	0.822407	-1.30409	-1.65116	-0.905047	-2.37357	-0.458494	-0.199163	-0.21852	-0.86317	-0.296881	-0.424494	-0.150854	-0.111391	0.0280782	0.273283	0.107602	0.0319844	0.108254	0.31281
196383	RILPL2	-0.311476	0.104227	-2.98844	0.00280409	0.0546008	0	3.92569	0.560164	-1.34256	-1.643	0.116552	-2.82159	-0.536015	-0.303727	-0.225006	-0.85851	0.0380292	-0.506981	-0.176449	-0.169985	0.0280882	0.273032	0.106462	0.0322846	0.108364	0.313222
10659	CELF2	-0.310866	0.104086	-2.98663	0.00282066	0.0547221	0	2.10177	0.834892	-2.04064	-1.04731	-1.26747	-1.87498	0.368988	-0.708892	-0.343421	-0.532868	-0.417959	-0.333915	0.121345	-0.398796	0.0283219	0.258873	0.108741	0.0317161	0.108148	0.316476
8875	VNN2	-0.310747	0.104073	-2.98584	0.00282798	0.0547221	0	2.47974	0.779543	-1.36465	0.285401	-0.813394	-1.96907	-1.74092	-1.37172	-0.228733	0.142882	-0.266537	-0.350924	-0.583763	-0.785512	0.028094	0.250638	0.107377	0.0317616	0.112438	0.327926
4616	GADD45B	-0.312362	0.104617	-2.98578	0.00282857	0.0547221	0.310255	5.01556	0.413984	-2.38649	1.0504	-0.763343	-2.44398	0.226279	-0.779008	-0.402712	0.534493	-0.250005	-0.437382	0.0743724	-0.43882	0.0284755	0.258928	0.107265	0.0320278	0.108027	0.317314
403341	ZBTB34	-0.310154	0.103967	-2.9832	0.0028525	0.0550667	0	0.615353	0.98729	-1.91768	-0.535295	-0.349005	-1.91013	-0.876889	-1.00573	-0.322452	-0.268854	-0.113956	-0.340265	-0.289583	-0.569464	0.0282734	0.252259	0.106613	0.0317328	0.109058	0.320607
166929	SGMS2	-0.310491	0.104109	-2.98237	0.00286027	0.0550985	0	2.26872	0.81085	-2.22885	-0.960448	-0.1216	-2.27921	-0.211721	0.1364	-0.375627	-0.487299	-0.0396764	-0.407262	-0.0695844	0.0762674	0.0284023	0.257421	0.106463	0.0319284	0.108018	0.312645
4688	NCF2	-0.309793	0.103978	-2.9794	0.00288811	0.055516	0	0.635748	0.986308	-1.72368	0.0807843	-0.90561	-2.04218	-1.00799	-0.726852	-0.289472	0.0403963	-0.297067	-0.364165	-0.333425	-0.409033	0.0282033	0.250051	0.107604	0.0317986	0.109417	0.316683
54899	PXK	-0.309438	0.104062	-2.97358	0.00294346	0.0563619	0	2.49565	0.77715	-1.64548	-1.402	-0.382901	-2.01684	-0.297195	-1.53689	-0.276212	-0.723575	-0.125044	-0.359573	-0.0977045	-0.885696	0.0281773	0.266361	0.106648	0.0317856	0.10808	0.332111
23347	SMCHD1	-0.30999	0.104252	-2.97346	0.00294465	0.0563619	0	4.57485	0.469932	-2.558	-0.987683	-0.216487	-2.27851	0.188229	0.789627	-0.432304	-0.501546	-0.070652	-0.407134	0.0618598	0.444896	0.0285613	0.257861	0.106508	0.031928	0.108005	0.317448
3611	ILK	-0.309542	0.104137	-2.97245	0.00295435	0.0564275	0	2.81884	0.727891	-2.90573	0.086547	0.0897621	-1.50502	-0.859172	-0.438417	-0.492737	0.0432785	0.0292869	-0.267368	-0.283674	-0.245674	0.0287554	0.250059	0.106454	0.0315598	0.109013	0.314009
59345	GNB4	-0.309363	0.104132	-2.97086	0.00296963	0.0565991	0	3.02429	0.696241	-2.54149	-0.812226	-1.11127	-1.47686	-0.622908	0.962995	-0.42945	-0.410365	-0.36554	-0.262323	-0.20519	0.544681	0.0285528	0.255262	0.108201	0.0315493	0.108509	0.319917
342538	NACA2	0.308606	0.104039	2.96625	0.00301459	0.0573345	0	2.38489	0.793722	2.22569	0.281794	0.238511	1.76435	0.393534	1.68098	0.375086	0.141072	0.0778446	0.313964	0.129433	0.974757	0.0284009	0.250622	0.106522	0.0316656	0.108175	0.336254
51573	GDE1	-0.414029	0.139622	-2.96537	0.00302321	0.0573773	30.1771	7.16098	0.208941	-3.05545	-0.787563	-0.02896	-1.22768	-3.17691	-0.62073	-0.518955	-0.397654	-0.0094484	-0.217773	-1.1209	-0.348682	0.0288475	0.254942	0.106444	0.0314658	0.124486	0.315539
8078	USP5	0.324958	0.10968	2.96279	0.0030486	0.0577372	5.07081	5.26708	0.384162	3.01266	1.31776	-0.105846	1.84484	-0.518951	0.907524	0.511449	0.677521	-0.0345354	0.328475	-0.170812	0.512626	0.0288207	0.264345	0.106458	0.031702	0.108338	0.31907
2581	GALC	-0.307802	0.103966	-2.9606	0.00307039	0.05794	0	0.982188	0.96399	-1.45231	-0.62974	-0.896772	-1.63684	-1.46848	-1.26558	-0.24353	-0.316839	-0.294137	-0.291024	-0.489485	-0.722085	0.0281183	0.253137	0.107581	0.0316114	0.111107	0.325535
2353	FOS	-0.308459	0.104194	-2.96042	0.00307218	0.05794	0	4.2735	0.510748	-1.18842	-0.113808	-2.11798	-2.30797	0.148735	-1.33328	-0.199038	-0.0569153	-0.712344	-0.412508	0.0488763	-0.76246	0.0280499	0.250101	0.113119	0.0319452	0.107986	0.327034
7570	ZNF22	0.3082	0.104181	2.95831	0.00309336	0.0582172	0	3.629	0.603964	1.95399	-0.656868	1.17053	1.27903	2.22101	0.43825	0.328639	-0.330671	0.385383	0.22694	0.754645	0.24558	0.0282874	0.253417	0.108397	0.0314817	0.115448	0.314008
57142	RTN4	-0.308065	0.104194	-2.95666	0.00310994	0.0584072	0	3.77046	0.582914	-2.00237	-0.0771798	0.586359	-2.08375	-1.90234	-0.438341	-0.336888	-0.0385935	0.191737	-0.371703	-0.640476	-0.245631	0.0283065	0.250047	0.106926	0.0318202	0.113352	0.314008
308	ANXA5	-0.39343	0.133147	-2.95486	0.00312808	0.0584499	25.1894	6.68355	0.245259	-1.8335	-0.939603	-0.648598	-2.80125	-2.6996	1.11927	-0.308127	-0.47642	-0.212197	-0.503211	-0.932847	0.635728	0.028242	0.257093	0.107035	0.0322697	0.119405	0.322604
929	CD14	-0.307614	0.104121	-2.95439	0.00313283	0.0584499	0	3.33783	0.648055	-0.865304	-0.409568	-2.04562	-1.64696	-1.55901	-1.34989	-0.144755	-0.205323	-0.686565	-0.292842	-0.520627	-0.772412	0.0279851	0.251317	0.112645	0.0316155	0.111521	0.327416
11006	LILRB4	-0.307278	0.104054	-2.95307	0.00314627	0.0584499	0	1.71162	0.887433	-1.94903	-0.544493	-1.88652	-1.52043	-0.638432	0.24244	-0.327794	-0.273516	-0.630426	-0.270131	-0.210331	0.135628	0.0282855	0.252338	0.111672	0.0315656	0.108537	0.31296
9185	REPS2	-0.307345	0.104091	-2.95266	0.00315046	0.0584499	0	2.73745	0.740385	-1.38164	-0.271869	-0.0747667	-2.74448	-0.618987	-1.24576	-0.2316	-0.136092	-0.0243939	-0.4927	-0.203892	-0.710314	0.0280986	0.250579	0.10645	0.0322288	0.108502	0.325114
3597	IL13RA1	-0.360756	0.12218	-2.95266	0.00315046	0.0584499	16.4264	5.98275	0.307901	-3.67051	0.188689	0.161995	-2.54813	-0.180246	-0.352265	-0.6281	0.0943969	0.0528608	-0.456496	-0.0592351	-0.197228	0.0292822	0.250278	0.106479	0.0320946	0.108001	0.313472
10562	OLFM4	-0.344379	0.116636	-2.95259	0.0031512	0.0584499	11.4662	5.64756	0.342036	-2.07819	0.285366	0.112787	-2.26644	-1.28345	-2.34945	-0.349836	0.142865	0.0368004	-0.404932	-0.426341	-1.41461	0.0283373	0.250638	0.10646	0.0319211	0.110346	0.362528
3459	IFNGR1	-0.307266	0.104103	-2.95156	0.00316172	0.0585244	0	3.29865	0.654049	-2.02894	-0.0642603	0.249846	-2.21253	-0.577648	-1.6119	-0.341424	-0.0321322	0.081547	-0.395112	-0.190213	-0.931852	0.0283171	0.250032	0.10653	0.0318904	0.108431	0.334209
5777	PTPN6	-0.306924	0.104048	-2.94983	0.0031795	0.0587326	0	1.72974	0.885132	-1.7345	-0.451668	-0.58905	-2.24014	-1.24665	0.547157	-0.291308	-0.226557	-0.192621	-0.40014	-0.413857	0.307021	0.028207	0.251604	0.106931	0.031906	0.110208	0.314857
9120	SLC16A6	-0.306329	0.103962	-2.94654	0.00321352	0.0592394	0	0.438464	0.994204	-1.93314	-0.908293	-0.635993	-1.59976	-1.24738	-0.197091	-0.325086	-0.460116	-0.208051	-0.284364	-0.414106	-0.110231	0.0282793	0.256616	0.107012	0.0315964	0.110211	0.312804
115817	DHRS1	-0.305841	0.104036	-2.93975	0.00328473	0.0604284	0	1.5755	0.904196	-1.59847	0.119668	-1.82128	-1.9468	-0.611126	-0.409475	-0.268249	0.0598472	-0.60761	-0.346894	-0.20129	-0.229384	0.0281622	0.250112	0.1113	0.0317506	0.108488	0.313815
116496	FAM129A	-0.51413	0.175107	-2.93609	0.00332379	0.0604669	51.8359	10.3812	0.0651278	-3.49358	-1.80374	1.25623	-2.97313	-2.50867	-1.60015	-0.596448	-0.95154	0.414175	-0.535157	-0.860665	-0.924593	0.0291476	0.278295	0.1087	0.0323993	0.117701	0.333872
56729	RETN	-0.305562	0.10408	-2.93582	0.00332666	0.0604669	0	2.86675	0.72052	-2.70217	-0.438507	0.0452111	-1.19332	-0.765882	-1.40682	-0.457285	-0.219915	0.0147506	-0.211644	-0.252618	-0.806646	0.0286385	0.251511	0.106445	0.0314555	0.108794	0.328767
64431	ACTR6	0.305556	0.10408	2.93577	0.00332716	0.0604669	0	2.15771	0.826921	2.2236	-0.44066	1.34396	1.93926	0.217477	0.153861	0.374727	-0.221002	0.443779	0.34553	0.0714776	0.0860362	0.0284	0.251526	0.109034	0.0317469	0.108022	0.312685
92565	FANK1	0.305854	0.104128	2.93728	0.00331109	0.0604669	0	2.86883	0.7202	2.18239	-0.0852015	2.05428	1.56258	0.0195123	0.253442	0.367665	-0.0426056	0.68964	0.27769	0.00641105	0.141792	0.0283818	0.250057	0.112701	0.0315818	0.107955	0.313003
1117	CHI3L2	0.306235	0.104232	2.938	0.00330336	0.0604669	0	4.52856	0.476072	3.1499	0.262765	0.776321	0.219422	1.41745	0.713784	0.53556	0.131525	0.254289	0.0388112	0.472006	0.401583	0.0289083	0.250541	0.107293	0.0312864	0.110886	0.316532
55833	UBAP2	0.305879	0.104094	2.93848	0.00329828	0.0604669	0	2.41989	0.788509	2.37108	0.815393	1.25428	1.65943	-0.46629	0.47255	0.40006	0.411999	0.413518	0.295084	-0.153426	0.264904	0.0284681	0.255304	0.108693	0.0316207	0.108264	0.314254
8702	B4GALT4	-0.30528	0.104021	-2.9348	0.00333761	0.0605345	0	1.41445	0.922726	-1.31859	-0.672632	-0.267649	-2.54496	-0.983454	-0.566327	-0.220965	-0.338719	-0.0873632	-0.455915	-0.325204	-0.317863	0.0280819	0.253585	0.106543	0.0320925	0.109346	0.315026
114791	TUBGCP5	0.305589	0.104153	2.93403	0.00334596	0.0605639	0	3.21245	0.66727	2.68216	-0.130016	-0.32473	1.88563	0.973912	0.0221532	0.453813	-0.065025	-0.106018	0.335839	0.322008	0.0123841	0.0286275	0.250132	0.10659	0.0317211	0.109319	0.312504
22909	FAN1	0.305255	0.1041	2.93233	0.00336429	0.0607735	0	2.4968	0.776978	1.86241	0.942818	0.0612007	2.47723	0.64613	-0.424263	0.313043	0.478096	0.0199676	0.443478	0.212881	-0.237706	0.0282527	0.257143	0.106448	0.0320488	0.108551	0.313913
6788	STK3	-0.305179	0.104101	-2.93157	0.00337256	0.0608006	0	2.85306	0.722628	-2.60539	-0.136054	-0.902092	-1.61562	0.38848	-1.03231	-0.440505	-0.0680467	-0.295901	-0.287211	0.127768	-0.584922	0.0285862	0.250145	0.107595	0.0316028	0.108169	0.321053
79895	ATP8B4	-0.305043	0.104085	-2.93072	0.00338174	0.0608443	0	2.26992	0.810674	-2.09171	-0.0860202	0.280265	-2.30485	-1.00669	-0.268506	-0.352147	-0.0430151	0.0914852	-0.41194	-0.33299	-0.150235	0.028343	0.250058	0.106553	0.0319434	0.109414	0.313064
1441	CSF3R	-0.304996	0.104148	-2.92848	0.00340619	0.0608929	0	3.63499	0.603067	-2.45695	0.690159	0.129575	-1.78224	-1.09748	-1.14038	-0.414853	0.347677	0.0422791	-0.317187	-0.363486	-0.648112	0.02851	0.253777	0.106466	0.0316735	0.109693	0.323001
2131	EXT1	-0.30525	0.104246	-2.92818	0.00340948	0.0608929	0	4.95137	0.421843	-0.448554	-1.37603	-1.25481	-1.84662	-2.36724	-0.917943	-0.0749661	-0.709322	-0.413695	-0.328796	-0.808154	-0.518638	0.0279319	0.265723	0.108694	0.0317028	0.116548	0.319225
347344	ZNF81	-0.304415	0.103975	-2.92776	0.00341409	0.0608929	0	1.71084	0.887531	-1.27527	-0.841212	-0.985397	-1.85187	-0.853716	-1.67911	-0.213663	-0.425335	-0.323565	-0.329744	-0.281855	-0.973592	0.0280709	0.255653	0.10782	0.0317053	0.109	0.336197
5997	RGS2	-0.305044	0.104204	-2.92738	0.00341829	0.0608929	0	4.17676	0.524258	-1.72193	0.0719474	-1.36596	-2.60868	0.693992	-0.789583	-0.289176	0.0359766	-0.451224	-0.467636	0.228747	-0.444871	0.0282027	0.25004	0.109122	0.0321348	0.108643	0.317448
917	CD3G	0.304861	0.104108	2.9283	0.00340817	0.0608929	0	3.12256	0.681097	2.60015	-0.0970168	0.783831	1.65443	-0.29479	1.22021	0.439597	-0.0485156	0.256769	0.294185	-0.0969128	0.695179	0.0285834	0.250074	0.10731	0.0316186	0.108078	0.324582
53831	GPR84	-0.304215	0.103944	-2.92672	0.00342562	0.0609029	0	1.15506	0.949115	-1.70874	-0.571029	-0.927937	-1.48573	-0.968845	-1.57091	-0.286937	-0.28698	-0.304474	-0.263911	-0.320312	-0.906574	0.0281983	0.252574	0.107662	0.0315526	0.109305	0.333047
8935	SKAP2	-0.304752	0.104158	-2.92587	0.00343497	0.0609487	0	4.49889	0.480032	-2.65886	0.455136	-0.0735115	-1.46235	-0.558652	-1.824	-0.449769	0.228308	-0.0239844	-0.259723	-0.183931	-1.06489	0.0286148	0.251629	0.10645	0.031544	0.1084	0.34085
4170	MCL1	-0.316339	0.108218	-2.92316	0.00346495	0.0613596	3.71317	5.19282	0.392805	-1.86329	0.671869	-1.17491	-2.94502	0.465876	-0.673264	-0.313193	0.338329	-0.386852	-0.529919	0.153289	-0.378517	0.028253	0.253577	0.108412	0.0323775	0.108264	0.316082
50484	RRM2B	-0.304223	0.104107	-2.92222	0.00347547	0.0614249	0	2.76855	0.735615	-1.8458	0.231371	-2.25746	-1.44846	-0.53906	-0.602208	-0.310218	0.115782	-0.762517	-0.257236	-0.177455	-0.338181	0.0282465	0.250419	0.114093	0.031539	0.108369	0.315359
7538	ZFP36	-0.304068	0.104091	-2.92119	0.003487	0.0615079	0	2.49647	0.777027	-1.68201	0.446796	-1.94038	-1.94419	-0.424738	-0.525033	-0.282405	0.224098	-0.649349	-0.346422	-0.13972	-0.294519	0.0281893	0.251569	0.111991	0.0317493	0.108211	0.314669
220042	DDIAS	-0.304196	0.104181	-2.91987	0.0035018	0.0615715	0	3.82725	0.574546	-2.466	-1.52477	-0.81066	-0.359025	-1.70632	-0.499221	-0.416414	-0.791688	-0.265633	-0.0635143	-0.571693	-0.279946	0.0285145	0.269587	0.107371	0.0312963	0.112255	0.314459
25923	ATL3	-0.303825	0.104062	-2.91965	0.00350429	0.0615715	0	1.99995	0.849152	-2.26945	-0.860173	0.210445	-2.07154	-0.477259	-0.265707	-0.382594	-0.435147	0.0686787	-0.36949	-0.157046	-0.148666	0.0284206	0.255917	0.106505	0.0318138	0.108279	0.313053
43	ACHE	0.304283	0.104268	2.91827	0.00351984	0.0617242	0	4.9345	0.423926	1.27507	1.91465	1.39129	2.43058	-0.493347	0.268811	0.21363	1.01737	0.45981	0.434928	-0.162356	0.150406	0.0280709	0.282345	0.109224	0.0320195	0.108301	0.313066
1154	CISH	-0.303611	0.104142	-2.91536	0.00355281	0.0619861	0	3.5431	0.616877	-2.81419	-0.341829	0.0595373	-0.798074	-1.54859	-0.983522	-0.476767	-0.171227	0.0194248	-0.141326	-0.517033	-0.556577	0.0287016	0.250916	0.106448	0.0313586	0.111472	0.320244
392	ARHGAP1	-0.399883	0.137172	-2.9152	0.00355458	0.0619861	28.2715	6.97073	0.222826	-1.65844	-1.14189	0.227281	-2.1148	-3.15489	-1.1158	-0.278408	-0.582944	0.0741767	-0.37734	-1.11195	-0.633688	0.0281815	0.260619	0.106515	0.0318367	0.124223	0.322539
140700	SAMD10	0.303456	0.104097	2.91513	0.00355545	0.0619861	0	2.98803	0.701832	2.0469	-0.175741	-0.377459	2.06489	1.25244	1.13597	0.344491	-0.0879129	-0.123264	0.368283	0.415819	0.645527	0.0283244	0.250242	0.106642	0.0318104	0.11023	0.322918
1601	DAB2	-0.30279	0.104035	-2.91047	0.00360881	0.0627063	0	2.86821	0.720295	-1.97059	0.330524	-0.545876	-1.53188	-1.15666	-1.83414	-0.331469	0.165545	-0.178445	-0.272184	-0.383426	-1.07136	0.0282939	0.250856	0.106862	0.0315699	0.109889	0.341195
90233	ZNF551	0.302935	0.104112	2.90971	0.00361767	0.0627063	0	2.99076	0.701411	0.807435	0.936252	0.987214	1.87528	2.24121	0.643722	0.135051	0.474672	0.324169	0.333969	0.761992	0.36173	0.0279757	0.257041	0.107825	0.0317162	0.115594	0.315771
100128731	OST4	0.302889	0.104087	2.90996	0.00361469	0.0627063	0	2.79726	0.731207	2.8454	0.891537	0.170583	1.02444	0.403362	1.06429	0.482208	0.45141	0.0556644	0.181558	0.132673	0.603566	0.0287198	0.256368	0.106483	0.0314093	0.108186	0.321607
55	ACPP	-0.302547	0.104018	-2.90861	0.00363045	0.0628068	0	1.58451	0.903116	-1.54402	-1.32347	-0.0402767	-2.08442	-1.04445	-0.686732	-0.259034	-0.680625	-0.0131406	-0.371826	-0.34566	-0.386178	0.0281454	0.264477	0.106445	0.0318206	0.109527	0.316228
3934	LCN2	-0.302884	0.104181	-2.90729	0.0036457	0.0629465	0	4.27934	0.509938	-2.27023	-0.357452	0.827736	-2.22865	-0.53117	-1.23118	-0.382727	-0.179084	0.271279	-0.398047	-0.174848	-0.701671	0.028421	0.251002	0.107411	0.0318995	0.108357	0.324809
23299	BICD2	-0.302901	0.104208	-2.90671	0.00365252	0.0629465	0	4.5256	0.476465	-1.54354	-1.39291	0.67528	-2.59201	-0.556349	-1.08066	-0.258953	-0.718579	0.220978	-0.464567	-0.18317	-0.613123	0.0281452	0.266136	0.107085	0.0321236	0.108396	0.321898
3460	IFNGR2	-0.301962	0.104005	-2.90333	0.00369215	0.0635078	0	1.72563	0.885655	-2.18479	-0.2369	-0.133633	-1.97288	-0.322021	-1.1453	-0.368076	-0.118554	-0.0436036	-0.351613	-0.105877	-0.651008	0.0283828	0.250439	0.106468	0.0317635	0.108102	0.323095
85464	SSH2	-0.301671	0.104061	-2.89899	0.00374372	0.0642622	0	2.8318	0.725898	-1.39606	0.227006	-0.173692	-2.25273	-1.45666	-1.41725	-0.234032	0.113595	-0.0566791	-0.402433	-0.48543	-0.812942	0.0281026	0.250403	0.106485	0.0319132	0.111055	0.329022
5226	PGD	-0.301983	0.104188	-2.89844	0.0037503	0.0642622	0	4.41395	0.491478	-2.28738	0.288121	0.73447	-1.99036	-1.28119	-1.16506	-0.385671	0.144248	0.24048	-0.354776	-0.425573	-0.662629	0.0284289	0.25065	0.107204	0.0317722	0.110338	0.323477
23601	CLEC5A	-0.301215	0.103992	-2.89652	0.00377322	0.0645321	0	1.80522	0.875386	-2.29768	-0.526519	-0.0908576	-1.34492	-0.966792	-1.37359	-0.387441	-0.264407	-0.0296444	-0.238712	-0.319625	-0.786636	0.0284336	0.252185	0.106454	0.0315031	0.109299	0.32797
7454	WAS	-0.34494	0.119279	-2.89188	0.00382948	0.0651238	13.7964	5.80022	0.326146	-0.975166	0.442188	-0.818173	-3.4793	-1.74102	-0.0689168	-0.163191	0.221773	-0.268117	-0.630447	-0.583798	-0.038528	0.0280049	0.251537	0.107388	0.0328331	0.112439	0.312537
7090	TLE3	-0.329941	0.114095	-2.8918	0.00383041	0.0651238	9.12653	5.50216	0.35771	-1.79925	1.09664	-0.236049	-2.4226	-1.71092	-1.558	-0.302304	0.558922	-0.0770405	-0.433466	-0.573295	-0.898641	0.0282297	0.259762	0.106521	0.0320145	0.112279	0.332689
10098	TSPAN5	-0.318274	0.110081	-2.89128	0.00383678	0.0651238	5.44124	5.28772	0.381785	-2.91322	-0.597605	-0.201418	-0.632675	-2.30851	0.0356795	-0.494046	-0.300484	-0.0657314	-0.111985	-0.786573	0.0199458	0.0287599	0.252822	0.106499	0.0313295	0.116095	0.31251
203286	ANKS6	0.390732	0.135116	2.89182	0.0038302	0.0651238	26.7956	6.83019	0.233579	2.90871	-0.464077	0.0705843	2.02889	2.97966	0.280382	0.493257	-0.232823	0.0230293	0.361757	1.04175	0.156892	0.0287572	0.251694	0.10645	0.0317918	0.122234	0.313115
2120	ETV6	-0.300698	0.104128	-2.88777	0.00387979	0.0655171	0	3.63278	0.603399	-1.61222	0.337098	0.23868	-2.62598	-0.90756	-1.21767	-0.270578	0.168849	0.0778999	-0.470823	-0.299821	-0.693679	0.0281666	0.250891	0.106522	0.0321465	0.109137	0.32453
29035	C16orf72	-0.300151	0.103965	-2.88705	0.00388878	0.0655171	0	0.999304	0.962622	-1.90743	0.291387	-0.792084	-1.68229	-1.27534	-0.726045	-0.320706	0.145887	-0.259495	-0.299194	-0.423587	-0.408573	0.0282695	0.250665	0.107329	0.0316302	0.110315	0.316673
79971	WLS	-0.300163	0.103983	-2.88664	0.00389374	0.0655171	0	1.74981	0.882565	-1.34933	-0.773385	-0.620662	-1.54483	-1.75698	-1.3435	-0.226148	-0.390358	-0.20301	-0.274507	-0.589376	-0.768581	0.02809	0.254762	0.106985	0.0315749	0.112525	0.327268
10165	SLC25A13	-0.300597	0.104141	-2.88643	0.00389636	0.0655171	0	3.34068	0.647619	-2.02143	-0.688373	0.577135	-2.22258	-1.34003	0.208561	-0.340142	-0.346764	0.188707	-0.396942	-0.445581	0.116653	0.0283141	0.253758	0.106911	0.031896	0.110567	0.31284
85379	KIAA1671	0.300915	0.104182	2.88835	0.00387266	0.0655171	0	4.33182	0.502695	2.34269	0.934935	-0.840952	2.0447	0.357805	1.13846	0.395176	0.473986	-0.275651	0.364621	0.117661	0.646989	0.0284546	0.257021	0.107442	0.0317999	0.108137	0.322965
25938	HEATR5A	-0.300125	0.104042	-2.88465	0.0039185	0.0657664	0	2.26657	0.811164	-1.88876	0.805015	-0.943013	-1.94216	-0.837049	-1.00519	-0.317528	0.406646	-0.309479	-0.346055	-0.276301	-0.569151	0.0282625	0.255168	0.107703	0.0317483	0.108959	0.320598
7421	VDR	-0.29969	0.103957	-2.88283	0.00394119	0.066024	0	0.825464	0.975381	-2.23478	-0.0645314	-0.450004	-1.79017	-0.600624	-0.608117	-0.376645	-0.0322678	-0.147012	-0.318615	-0.197814	-0.34153	0.028405	0.250033	0.106727	0.0316771	0.108469	0.315416
55281	TMEM140	-0.299589	0.104101	-2.87786	0.00400382	0.0669486	0	2.78977	0.732359	-2.19093	-1.26766	0.388149	-1.90058	-0.944867	0.0952502	-0.369127	-0.650372	0.126761	-0.33854	-0.312289	0.0532525	0.0283855	0.263218	0.106654	0.0317282	0.109238	0.312571
55196	KIAA1551	-0.299681	0.104234	-2.87509	0.00403916	0.0672625	0	4.74252	0.448105	-2.35823	-0.327235	0.346664	-2.61029	0.447112	-0.454577	-0.397849	-0.163892	0.113191	-0.467932	0.147099	-0.254775	0.028462	0.250839	0.106611	0.0321359	0.108239	0.314123
6793	STK10	-0.299704	0.104248	-2.87492	0.00404128	0.0672625	0	4.9384	0.423445	-1.19909	1.03361	-0.828931	-2.52678	-1.90188	-0.0924763	-0.200833	0.525653	-0.271674	-0.452573	-0.640312	-0.0517014	0.0280524	0.258635	0.107414	0.0320806	0.113349	0.312567
9043	SPAG9	-0.299197	0.104082	-2.87463	0.00404502	0.0672625	0	3.36123	0.644482	-0.968232	0.387449	-0.899314	-2.24913	-1.56278	-1.49248	-0.162026	0.19418	-0.29498	-0.401777	-0.521928	-0.85857	0.0280035	0.251178	0.107587	0.0319111	0.111539	0.330929
134957	STXBP5	-0.299336	0.10417	-2.87353	0.00405909	0.0673719	0	3.78208	0.581198	-2.57099	-0.280158	-0.105495	-2.26168	0.457293	-0.123854	-0.434551	-0.140251	-0.0344208	-0.404065	0.150457	-0.0692497	0.0285681	0.250615	0.106458	0.0319183	0.108252	0.31262
2217	FCGRT	-0.298912	0.104093	-2.87158	0.00408428	0.0675665	0	2.86562	0.720693	-1.08857	-0.218438	-1.29387	-2.39432	-1.45987	0.583779	-0.182243	-0.109301	-0.42686	-0.428289	-0.486532	0.327741	0.0280277	0.250373	0.10884	0.0319971	0.111069	0.315185
91056	AP5B1	-0.298971	0.104118	-2.87146	0.00408583	0.0675665	0	3.14231	0.678057	-3.06039	0.0790284	-0.116449	-1.12326	-0.737768	-0.442491	-0.519821	0.0395181	-0.0379954	-0.199154	-0.243277	-0.247968	0.0288506	0.250049	0.106462	0.0314355	0.108733	0.314037
51363	CHST15	-0.298604	0.104025	-2.87051	0.00409815	0.0676458	0	2.31961	0.803383	-2.03464	0.107579	-0.372802	-2.14177	-0.102786	-1.2928	-0.342397	0.0537993	-0.12174	-0.382241	-0.0337743	-0.738287	0.0283195	0.25009	0.106638	0.0318513	0.10797	0.326127
23191	CYFIP1	-0.298627	0.104089	-2.86896	0.00411825	0.0677501	0	2.72991	0.74154	-0.79245	-0.484062	-0.550761	-2.91428	-1.04711	-0.453621	-0.132539	-0.242922	-0.180048	-0.524196	-0.346551	-0.254237	0.0279734	0.251844	0.106869	0.0323539	0.109535	0.314116
4267	CD99	1.00816	0.351414	2.86886	0.00411953	0.0677501	87.4184	39.7404	1.68e-07	-0.155598	2.49963	6.0587	2.48707	1.96552	2.39336	-0.0259968	1.39321	2.7491	0.445282	0.662867	1.44542	0.0279147	0.310658	0.205884	0.0320551	0.113736	0.364731
9021	SOCS3	-0.349845	0.122058	-2.86623	0.00415396	0.0680674	16.0876	5.9586	0.310269	-1.92975	-1.94581	-2.0177	-0.783395	-0.416372	-1.83781	-0.324509	-1.03613	-0.676659	-0.13872	-0.136961	-1.0737	0.028278	0.283549	0.112467	0.0313557	0.108201	0.341321
6343	SCT	0.298388	0.104095	2.86649	0.00415048	0.0680674	0	2.86397	0.720948	2.44329	1.12283	1.4568	1.16668	-0.334582	0.504945	0.412498	0.57281	0.482069	0.206894	-0.110013	0.283177	0.0285032	0.260253	0.1095	0.0314478	0.108114	0.314505
202	CRYBG1	-0.3375	0.117858	-2.86362	0.00418836	0.0683819	12.5136	5.71517	0.334928	-2.00493	-1.13871	0.860745	-2.03424	-1.63913	-1.80233	-0.337326	-0.581251	0.282202	-0.362725	-0.548338	-1.05112	0.0283075	0.260558	0.10749	0.0317945	0.111911	0.340121
7353	UFD1	0.309883	0.108192	2.86419	0.00418083	0.0683819	3.7478	5.19469	0.392586	2.597	0.996097	0.679937	1.89561	0.489182	-1.502	0.439052	0.505954	0.222511	0.337641	0.160981	-0.86437	0.0285817	0.258	0.107094	0.0317259	0.108296	0.331178
7056	THBD	-0.29791	0.104091	-2.862	0.00420976	0.068607	0	4.55248	0.472893	-0.981512	-0.627858	-0.887127	-2.32082	-0.300182	-2.26332	-0.164256	-0.315881	-0.29094	-0.414856	-0.0986877	-1.35497	0.0280061	0.253118	0.107556	0.0319528	0.108083	0.358399
5273	SERPINB10	-0.297819	0.104163	-2.85917	0.00424756	0.0690977	0	4.26643	0.511728	-1.17809	-0.483928	0.492139	-2.86995	-0.957462	-1.19317	-0.1973	-0.242854	0.16082	-0.515955	-0.316503	-0.679198	0.0280476	0.251843	0.106783	0.0323204	0.109273	0.324033
162461	TMEM92	-0.296808	0.103977	-2.85456	0.00430963	0.0699148	0	1.30261	0.934663	-1.60284	-0.43548	-0.124122	-1.91087	-1.64351	-0.569602	-0.268988	-0.218388	-0.0404997	-0.340399	-0.549859	-0.319717	0.0281636	0.25149	0.106464	0.0317332	0.111933	0.315055
11314	CD300A	-0.297006	0.104056	-2.85429	0.00431333	0.0699148	0	2.27291	0.810237	-2.31998	0.64253	-0.725837	-1.91558	-0.654553	0.00298251	-0.391272	0.323358	-0.237633	-0.34125	-0.215671	0.00166727	0.028444	0.253268	0.107186	0.0317354	0.108567	0.3125
266747	RGL4	-0.296793	0.104082	-2.85151	0.00435116	0.0704012	0	3.50523	0.622596	-2.18767	-0.671527	0.607716	-1.63808	-1.02142	-1.51776	-0.368569	-0.338155	0.198754	-0.291246	-0.337929	-0.873996	0.0283841	0.253573	0.106962	0.0316119	0.109457	0.331597
351	APP	-0.382826	0.134349	-2.84948	0.00437904	0.0707251	26.2385	6.7786	0.237633	-2.0102	-1.34881	0.977323	-2.78282	-2.26423	-0.845546	-0.338225	-0.694434	0.32088	-0.499796	-0.770383	-0.476957	0.0283096	0.26507	0.107797	0.0322563	0.115764	0.318187
4205	MEF2A	-0.335175	0.117668	-2.84848	0.0043929	0.0708218	12.3423	5.70401	0.336094	-2.69444	0.241725	-2.48595	-0.637244	-0.615898	-1.19894	-0.455944	0.120973	-0.846188	-0.112794	-0.202869	-0.682608	0.0286342	0.250457	0.115864	0.0313302	0.108496	0.324149
1051	CEBPB	-0.296032	0.10396	-2.84757	0.00440541	0.0708358	0	1.57135	0.904693	-2.09662	0.160432	-1.12813	-1.3815	-0.570566	-1.32352	-0.352986	0.0802483	-0.37118	-0.245253	-0.18787	-0.756622	0.028345	0.250201	0.108255	0.0315155	0.108419	0.326812
23368	PPP1R13B	0.296459	0.10412	2.84728	0.00440952	0.0708358	0	4.47333	0.483459	1.01218	0.98789	0.207485	1.66311	2.12385	1.80559	0.169406	0.501654	0.0677123	0.295745	0.719501	1.05318	0.028012	0.257864	0.106503	0.0316222	0.114766	0.34023
1398	CRK	-0.295706	0.103924	-2.8454	0.0044356	0.0711277	0	0.922387	0.96858	-1.98674	-0.444176	-1.1206	-1.04705	-1.12621	-1.11976	-0.334222	-0.222776	-0.36866	-0.185582	-0.373161	-0.636011	0.0283002	0.251551	0.108231	0.0314151	0.109787	0.322613
2258	FGF13	-0.29543	0.103942	-2.84224	0.0044797	0.0717072	0	1.32172	0.932681	-1.61302	-0.446439	-0.325736	-1.61747	-1.51687	-1.25527	-0.270713	-0.223918	-0.106348	-0.287545	-0.506111	-0.715958	0.0281669	0.251567	0.106591	0.0316035	0.111325	0.325315
3685	ITGAV	-0.295634	0.104101	-2.83988	0.00451301	0.0720065	0	3.23944	0.663126	-1.40956	-0.9206	-0.25299	-2.40229	-1.4173	0.79136	-0.236312	-0.466519	-0.0825742	-0.429748	-0.471954	0.445888	0.0281063	0.256801	0.106532	0.032002	0.110885	0.31747
8638	OASL	-0.375065	0.132075	-2.83978	0.00451441	0.0720065	24.5003	6.62254	0.250259	-3.15602	-1.44833	-1.87982	-2.04911	0.101535	1.1062	-0.536638	-0.749136	-0.628078	-0.365421	0.0333631	0.628068	0.0289123	0.267538	0.111633	0.0318022	0.107969	0.322362
26270	FBXO6	-0.295301	0.104137	-2.83569	0.00457267	0.0728066	0	3.71625	0.590948	-1.87175	0.561771	-0.743312	-1.79887	-1.9615	0.549939	-0.314633	0.282281	-0.243396	-0.320183	-0.661439	0.308594	0.0282561	0.25249	0.107222	0.031681	0.113711	0.314881
4615	MYD88	-0.294613	0.103927	-2.83482	0.00458517	0.0728766	0	0.665629	0.984802	-1.84669	-0.076898	-0.508588	-1.69177	-1.37414	-0.525981	-0.31037	-0.0384526	-0.166213	-0.300898	-0.457207	-0.295055	0.0282469	0.250046	0.106806	0.0316342	0.110705	0.314676
60675	PROK2	-0.36485	0.128752	-2.83375	0.00460059	0.0729927	22.0493	6.41431	0.267966	-3.59142	0.278432	0.0513653	-1.58922	-0.869765	-1.91603	-0.613924	0.139385	0.0167585	-0.282471	-0.287207	-1.12391	0.0292211	0.250607	0.106446	0.0315922	0.10904	0.344079
932	MS4A3	-0.294741	0.104069	-2.83217	0.00462331	0.073119	0	2.64589	0.754381	-1.50404	-0.71165	-0.54668	-2.70296	0.249273	-0.48116	-0.252273	-0.358675	-0.178709	-0.485025	0.0819359	-0.269758	0.0281334	0.25402	0.106863	0.0321995	0.108043	0.314319
6279	S100A8	-0.294746	0.104075	-2.83207	0.0046248	0.073119	0	3.10497	0.683806	-2.91089	-0.442184	-0.227266	-1.07232	-0.152782	-1.10992	-0.493638	-0.22177	-0.0741719	-0.190081	-0.0502063	-0.630242	0.0287585	0.251537	0.106515	0.0314217	0.107988	0.32243
6688	SPI1	-0.294388	0.104198	-2.82528	0.00472399	0.0742128	0	4.50766	0.478859	-1.69111	1.40139	-0.807563	-2.34929	-1.17266	-0.345897	-0.283947	0.723242	-0.26461	-0.420056	-0.388827	-0.193652	0.0281923	0.266346	0.107364	0.0319698	0.109944	0.313438
94056	SYAP1	-0.535004	0.189364	-2.82527	0.00472405	0.0742128	58.39	12.0163	0.0345645	-1.18608	-0.58018	-3.50314	-1.02836	-2.8465	-1.40895	-0.198644	-0.291628	-1.24812	-0.182256	-0.989489	-0.807929	0.0280494	0.252658	0.12694	0.0314103	0.120837	0.328819
51149	MRNIP	0.294462	0.104231	2.82507	0.00472699	0.0742128	0	4.98134	0.418162	1.6306	1.46852	-0.79265	2.10852	1.75251	-0.0394491	0.27369	0.760328	-0.259682	0.3762	0.587811	-0.0220532	0.0281725	0.268066	0.10733	0.0318334	0.112501	0.312512
2618	GART	0.29425	0.104116	2.82617	0.00471079	0.0742128	0	3.30272	0.653425	1.61278	2.16966	0.150196	1.77934	0.84175	0.290446	0.270673	1.17466	0.0490097	0.316663	0.277867	0.162536	0.0281668	0.29312	0.106474	0.0316722	0.10897	0.31316
101	ADAM8	-0.293681	0.104012	-2.82353	0.00474978	0.0744408	0	2.26648	0.811178	-1.31344	-0.52105	-0.15042	-2.59334	-0.43848	-1.14101	-0.220096	-0.261637	-0.0490827	-0.464812	-0.144252	-0.648486	0.0280806	0.252139	0.106474	0.0321245	0.108228	0.323013
1939	EIF2D	0.294014	0.104152	2.82294	0.0047586	0.0744494	0	4.048	0.542526	3.09516	0.726818	1.02295	0.312945	0.385164	0.784832	0.52593	0.366446	0.336064	0.0553589	0.126675	0.442152	0.0288728	0.254196	0.107929	0.0312925	0.108166	0.317387
54920	DUS2	-0.293421	0.103974	-2.82207	0.00477153	0.0745034	0	1.332	0.931605	-1.0496	-0.826662	-1.06307	-1.96808	-1.57805	-0.131592	-0.175693	-0.417816	-0.34944	-0.350744	-0.527201	-0.073578	0.0280196	0.255455	0.108049	0.0317611	0.111612	0.312635
6342	SCP2	-0.293527	0.104029	-2.82159	0.00477862	0.0745034	0	2.18304	0.823283	-1.61738	0.408384	-0.170601	-2.2894	-1.35918	-0.493856	-0.271451	0.204726	-0.0556702	-0.40912	-0.452106	-0.276919	0.0281682	0.25131	0.106483	0.0319344	0.110644	0.314417
5294	PIK3CG	-0.293379	0.104079	-2.81882	0.00482006	0.0750194	0	2.87506	0.71924	-1.16421	0.667998	-1.56992	-2.17768	-1.30269	-0.339475	-0.194964	0.336352	-0.520709	-0.388769	-0.432878	-0.190046	0.0280444	0.253535	0.11001	0.0318709	0.11042	0.313403
55014	STX17	0.34538	0.122567	2.8179	0.00483396	0.0751058	16.7212	6.00393	0.305837	0.937055	1.39467	0.198541	3.60642	1.11714	-0.131115	0.156793	0.719546	0.0647918	0.654691	0.370102	-0.0733115	0.0279977	0.26618	0.106498	0.0329548	0.109757	0.312634
1088	CEACAM8	-0.292848	0.104078	-2.81373	0.00489703	0.0758734	0	3.1108	0.682908	-2.25117	-1.02501	0.251576	-1.99408	0.127396	-0.923893	-0.379456	-0.521132	0.0821122	-0.355451	0.0418623	-0.522072	0.0284123	0.258487	0.106531	0.0317741	0.107978	0.319314
81490	PTDSS2	0.292764	0.104056	2.81352	0.00490023	0.0758734	0	2.54785	0.769273	2.65774	0.143427	1.53574	0.688256	0.712198	0.200403	0.449576	0.0717365	0.509004	0.12184	0.234788	0.112085	0.0286142	0.250161	0.109852	0.0313385	0.10868	0.312814
171546	SPTSSA	-0.292843	0.104109	-2.81286	0.00491025	0.075898	0	3.29418	0.654734	-2.596	-0.719953	0.50571	-1.34139	-1.37518	-0.0511989	-0.438879	-0.362928	0.165269	-0.238081	-0.457565	-0.028622	0.0285812	0.254116	0.106802	0.031502	0.110709	0.31252
9093	DNAJA3	0.292281	0.103933	2.81222	0.00492009	0.0759195	0	0.813818	0.976144	2.23326	0.0773011	1.08615	1.48829	0.407489	0.410098	0.376385	0.0386542	0.357144	0.26437	0.134033	0.229735	0.0284043	0.250047	0.108121	0.0315536	0.108191	0.313819
55357	TBC1D2	-0.380623	0.135377	-2.81157	0.00492999	0.0759421	26.9728	6.84676	0.232289	-2.36008	1.22149	-2.39734	-2.65084	-1.26811	0.367765	-0.398167	0.625503	-0.813508	-0.475407	-0.421134	0.205936	0.0284629	0.262227	0.11515	0.0321634	0.110288	0.31356
286530	P2RY8	0.292804	0.104187	2.81036	0.00494855	0.0760978	0	4.37558	0.496701	2.57134	-0.665157	0.359675	2.24381	-0.227173	0.0617807	0.434612	-0.334902	0.117446	0.400808	-0.0746662	0.0345381	0.0285682	0.253505	0.106624	0.0319081	0.108028	0.31253
90007	MIDN	-0.291799	0.103986	-2.80613	0.00501408	0.0766174	0	1.81938	0.873529	-2.40982	-0.232907	-0.0946725	-1.13312	-1.37726	-0.801542	-0.406731	-0.116552	-0.0308892	-0.200912	-0.458274	-0.451718	0.0284868	0.250425	0.106455	0.0314382	0.110718	0.317601
79730	NSUN7	-0.291649	0.103938	-2.806	0.00501608	0.0766174	0	1.9031	0.862383	-1.65485	-0.303932	-1.37075	-1.26627	-0.766209	-1.69599	-0.277799	-0.152186	-0.452847	-0.224661	-0.252727	-0.984131	0.0281803	0.250724	0.109141	0.0314777	0.108795	0.336713
11046	SLC35D2	0.291821	0.104	2.80598	0.00501641	0.0766174	0	2.16001	0.826591	1.80215	0.766909	0.215748	1.15666	1.9648	0.976088	0.302798	0.387028	0.0704107	0.205108	0.662612	0.552267	0.0282307	0.254681	0.106508	0.0314449	0.113732	0.320125
51760	SYT17	0.347403	0.123749	2.80733	0.00499548	0.0766174	17.6764	6.07359	0.299124	3.08305	1.25257	1.39772	0.474531	1.77169	-0.719313	0.523801	0.642225	0.46199	0.0839639	0.594522	-0.404734	0.0288651	0.262889	0.109251	0.0313081	0.112605	0.316595
10287	RGS19	-0.292003	0.104182	-2.80282	0.00506582	0.077034	0	4.33354	0.502458	-1.86795	-1.17509	0.360346	-2.67949	0.0729179	0.066637	-0.313987	-0.600646	0.117665	-0.480691	0.0239591	0.0372533	0.0282547	0.261274	0.106625	0.0321831	0.107962	0.312535
10097	ACTR2	-0.291473	0.104011	-2.80234	0.00507341	0.077034	0	1.98976	0.85056	-1.80797	-0.352747	-1.77475	-0.98365	-1.52714	-0.0142881	-0.303786	-0.176718	-0.591406	-0.174301	-0.509644	-0.00798731	0.0282328	0.250976	0.111045	0.0313992	0.111372	0.312502
57446	NDRG3	-0.291692	0.1041	-2.80205	0.00507794	0.077034	0	3.25219	0.661168	-1.3238	0.060778	-0.215461	-2.73592	-1.29558	0.37061	-0.221843	0.0303908	-0.0703169	-0.491116	-0.43046	0.207534	0.0280833	0.250029	0.106508	0.0322227	0.110393	0.313577
91368	CDKN2AIPNL	0.291888	0.104113	2.80357	0.00505406	0.077034	0	4.22016	0.518173	2.5709	-0.274073	0.340039	1.67557	-0.289	1.54558	0.434536	-0.137198	0.111024	0.297985	-0.0950072	0.89102	0.028568	0.250588	0.106605	0.0316274	0.108073	0.332348
64174	DPEP2	-0.291669	0.10418	-2.79966	0.00511572	0.0774765	0	4.40286	0.492985	-2.03778	0.0199827	-0.9413	-2.58737	0.582223	0.410436	-0.342933	0.00999143	-0.30891	-0.463714	0.191726	0.229925	0.0283207	0.250003	0.107698	0.0321205	0.108438	0.313822
2588	GALNS	-0.290621	0.103939	-2.79607	0.00517289	0.0781558	0	1.24256	0.94073	-1.64659	-0.569375	-0.610418	-1.27491	-1.82933	-0.825005	-0.2764	-0.286141	-0.199642	-0.226203	-0.61474	-0.465166	0.0281777	0.252559	0.106967	0.0314804	0.112927	0.317909
79932	KIAA0319L	-0.291293	0.104191	-2.79575	0.00517795	0.0781558	0	4.54547	0.473823	-1.87912	-1.06455	1.00631	-2.37889	-0.997809	-0.173014	-0.315887	-0.541957	0.330522	-0.425467	-0.330013	-0.0967537	0.0282589	0.259179	0.10788	0.0319877	0.109388	0.312734
51379	CRLF3	-0.34453	0.12328	-2.7947	0.00519481	0.0782789	17.1022	6.03152	0.303164	-1.36809	-0.00317251	-2.37081	-0.992624	-2.55432	-0.605955	-0.229312	-0.00158625	-0.803784	-0.175897	-0.877782	-0.340305	0.028095	0.25	0.114943	0.0314014	0.118093	0.315395
80746	TSEN2	0.290934	0.104188	2.7924	0.00523194	0.0787066	0	4.49622	0.480389	1.74002	2.19479	0.431933	2.03173	-0.258397	0.260143	0.292245	1.19066	0.141094	0.362271	-0.0849373	0.145548	0.0282089	0.294302	0.106705	0.0317932	0.108049	0.31303
10311	VPS26C	-0.322685	0.115635	-2.79055	0.00526183	0.0790045	10.6382	5.59523	0.347616	-2.36672	-0.213789	-0.380757	-3.19556	0.420362	0.384901	-0.39931	-0.106971	-0.124343	-0.576798	0.138277	0.215566	0.028466	0.250358	0.106646	0.0325801	0.108206	0.313662
214	ALCAM	-0.290478	0.10411	-2.79009	0.00526931	0.0790045	0	3.46947	0.628012	-1.48318	-1.384	0.501961	-2.49207	-0.681965	-0.45972	-0.248746	-0.713691	0.164039	-0.446201	-0.224758	-0.257673	0.0281272	0.265917	0.106797	0.0320583	0.108619	0.31416
1102	RCBTB2	-0.290019	0.104017	-2.7882	0.00530023	0.0793359	0	2.15126	0.827844	-1.78478	-0.589189	-0.05476	-1.63992	-1.92298	0.0503092	-0.299846	-0.296206	-0.0178661	-0.291577	-0.647779	0.0281246	0.0282246	0.252742	0.106447	0.0316126	0.113476	0.31252
397	ARHGDIB	-0.290304	0.104169	-2.78686	0.00532213	0.0795314	0	4.28693	0.508886	-2.04355	0.632132	0.143642	-2.59918	-0.778264	0.309452	-0.343919	0.318058	0.0468702	-0.465887	-0.256735	0.173196	0.0283231	0.253161	0.106471	0.0321284	0.108822	0.31325
84270	CARD19	-0.289438	0.104025	-2.78238	0.00539618	0.0804172	0	3.40976	0.637083	-1.5892	0.218983	-1.51238	-1.74133	-0.0889176	-1.8029	-0.26668	0.109574	-0.501019	-0.309817	-0.0292167	-1.05148	0.0281593	0.250375	0.109745	0.0316555	0.107966	0.34014
752	FMNL1	-0.289603	0.104092	-2.78219	0.00539929	0.0804172	0	3.50834	0.622126	-1.81819	1.15372	-1.13853	-1.56553	-1.44136	-0.887354	-0.305524	0.589246	-0.37466	-0.278219	-0.480188	-0.501002	0.0282365	0.26085	0.10829	0.0315829	0.110988	0.318775
706	TSPO	-0.289485	0.104103	-2.78075	0.00542342	0.0806431	0	3.46394	0.62885	-2.06736	0.610433	0.345056	-2.22374	-1.11037	-0.502887	-0.347985	0.307009	0.112665	-0.397152	-0.367823	-0.282016	0.0283328	0.252945	0.10661	0.0318967	0.109735	0.314488
79865	TREML2	-0.289392	0.104119	-2.77943	0.00544541	0.0807118	0	4.3488	0.500364	-2.27343	0.4945	0.454115	-1.59698	-1.37071	-1.42323	-0.383277	0.2482	0.148359	-0.283865	-0.45604	-0.816553	0.0284225	0.251925	0.106732	0.0315953	0.110691	0.329169
112752	IFT43	0.289484	0.104154	2.7794	0.00544599	0.0807118	0	4.23702	0.51582	2.96321	0.404487	0.683215	1.29536	-0.690197	0.629858	0.502788	0.202763	0.22359	0.229856	-0.227488	0.35386	0.0287901	0.251285	0.1071	0.0314869	0.108635	0.31563
81611	ANP32E	-0.289149	0.10406	-2.77867	0.00545819	0.0807597	0	2.86024	0.721523	-2.05297	-0.354133	-1.05343	-0.770091	-2.13022	0.0242299	-0.345527	-0.177415	-0.346223	-0.136359	-0.721793	0.013545	0.0283269	0.250984	0.10802	0.0313532	0.11481	0.312505
27020	NPTN	-0.288941	0.104026	-2.77759	0.00547639	0.0808959	0	2.84002	0.724634	-1.2205	0.116557	-0.0471704	-2.27953	-1.53449	-1.2242	-0.204438	0.0582909	-0.0153898	-0.40732	-0.512175	-0.697538	0.0280575	0.250106	0.106446	0.0319286	0.111406	0.324664
5976	UPF1	-0.288983	0.104117	-2.77555	0.00551091	0.0812342	0	3.8827	0.566424	-1.60965	0.963169	-1.07595	-2.45866	-0.105335	-0.924095	-0.270141	0.488721	-0.353739	-0.440072	-0.0346118	-0.522189	0.0281658	0.257464	0.108089	0.032037	0.10797	0.319317
124935	SLC43A2	-0.288685	0.104024	-2.77517	0.00551735	0.0812342	0	2.29728	0.806666	-2.02578	0.721076	-1.02824	-2.02681	-0.331219	-0.316426	-0.340884	0.363503	-0.337828	-0.36138	-0.108905	-0.177109	0.0283159	0.254129	0.107944	0.0317907	0.108111	0.313284
54790	TET2	-0.288268	0.103926	-2.77379	0.00554071	0.0813119	0	2.00615	0.848293	-1.35635	-0.893885	-1.00179	-1.5861	-0.590049	-1.78715	-0.227332	-0.452629	-0.32902	-0.281912	-0.194315	-1.04149	0.0280918	0.256402	0.107867	0.031591	0.108451	0.339618
1389	CREBL2	0.299261	0.107887	2.77384	0.0055399	0.0813119	3.46892	5.17968	0.394348	2.38621	0.266194	-0.812506	2.69689	0.2134	0.117558	0.402665	0.133244	-0.266243	0.483904	0.0701365	0.065728	0.0284754	0.250555	0.107375	0.0321952	0.108019	0.312608
9922	IQSEC1	-0.288641	0.104157	-2.7712	0.00558494	0.0818276	0	4.7187	0.451165	-1.14092	0.113639	-2.62087	-1.64843	-0.334965	-1.17695	-0.191045	0.0568312	-0.896547	-0.293106	-0.110139	-0.669631	0.0280391	0.250101	0.117019	0.0316161	0.108114	0.32371
9914	ATP2C2	-0.288175	0.104046	-2.7697	0.00561086	0.0820736	0	3.4681	0.628219	-2.09582	0.685116	-1.27349	-0.965683	-1.18674	-1.52145	-0.352849	0.345098	-0.419988	-0.171106	-0.393584	-0.876249	0.0283447	0.253722	0.108764	0.0313949	0.109993	0.331695
90952	ESAM	-0.287462	0.103899	-2.76674	0.00566199	0.0826871	0	0.925366	0.968358	-1.97619	-0.690703	-0.37137	-1.67025	-0.361147	-1.06759	-0.332423	-0.347955	-0.121272	-0.297028	-0.118762	-0.60549	0.0282961	0.253784	0.106636	0.0316252	0.10814	0.321665
57476	GRAMD1B	-0.28777	0.104084	-2.76479	0.00569597	0.0830486	0	3.27688	0.657383	-1.3091	-1.33598	-2.01079	-1.70535	-0.477032	0.493232	-0.219365	-0.687438	-0.674212	-0.303341	-0.156971	0.276567	0.0280795	0.264768	0.112424	0.03164	0.108279	0.314412
6249	CLIP1	-0.286909	0.104047	-2.75749	0.00582477	0.0847891	0	3.53965	0.617397	-2.11243	0.431489	-0.180752	-1.17307	-1.69646	-1.48596	-0.355691	0.216375	-0.0589839	-0.208033	-0.568259	-0.854601	0.0283517	0.251463	0.106488	0.0314496	0.112203	0.330759
22807	IKZF2	0.28679	0.104053	2.75618	0.00584814	0.0849917	0	3.90127	0.563716	0.754243	-0.0167108	0.700329	2.06199	1.79555	1.72115	0.126136	-0.00835542	0.229227	0.367757	0.60288	0.999888	0.0279676	0.250002	0.107134	0.0318088	0.112737	0.337494
10221	TRIB1	-0.286679	0.104143	-2.75274	0.00590987	0.0854335	0	4.87525	0.431294	-2.05055	0.879207	-1.98583	-1.09541	-0.439075	-1.46249	-0.345113	0.445011	-0.66538	-0.194193	-0.144448	-0.84033	0.0283259	0.256189	0.112268	0.0314279	0.108229	0.330154
55784	MCTP2	-0.286357	0.10403	-2.75264	0.00591161	0.0854335	0	3.89628	0.564444	-1.87003	0.653272	-1.06555	-1.3786	-0.740173	-1.99142	-0.314341	0.328836	-0.350269	-0.244734	-0.244076	-1.1729	0.0282555	0.253379	0.108057	0.0315145	0.108738	0.346892
56905	C15orf39	-0.286533	0.104102	-2.75244	0.00591533	0.0854335	0	3.47063	0.627836	-1.23203	0.0780143	-0.798431	-2.97717	-0.128665	0.0707863	-0.206379	0.0390109	-0.261592	-0.53591	-0.0422794	0.0395732	0.0280603	0.250048	0.107343	0.0324024	0.107978	0.312539
51098	IFT52	0.373477	0.135693	2.75237	0.00591652	0.0854335	27.38	6.88516	0.229322	3.39165	2.08843	-0.177414	1.98933	1.04206	-0.674588	0.578311	1.12359	-0.0578943	0.354591	0.344856	-0.379269	0.0290736	0.289452	0.106487	0.0317717	0.109519	0.316096
27071	DAPP1	-0.363956	0.132305	-2.75088	0.00594346	0.0856849	24.9867	6.66549	0.246731	-3.85841	-1.06108	0.216693	-2.42561	0.0344102	0.0485106	-0.661961	-0.540127	0.0707192	-0.434017	0.0113061	0.027119	0.0294339	0.259117	0.106508	0.0320164	0.107956	0.312518
10867	TSPAN9	-0.286437	0.104162	-2.74992	0.00596101	0.0858004	0	4.54307	0.474141	-1.8973	1.35673	-0.319418	-2.00414	-1.45779	-0.648781	-0.318982	0.69876	-0.104282	-0.357272	-0.485818	-0.364603	0.0282657	0.265258	0.106586	0.0317792	0.11106	0.315823
4436	MSH2	0.285807	0.103988	2.74847	0.00598739	0.0860424	0	2.85205	0.722782	1.57954	-0.475675	1.36604	1.2916	1.25166	1.60747	0.265045	-0.238683	0.451253	0.229183	0.415557	0.929116	0.0281563	0.25178	0.109122	0.0314857	0.110227	0.334081
64101	LRRC4	-0.285794	0.104061	-2.74641	0.00602508	0.086446	0	2.97072	0.7045	-2.21852	-0.0861609	0.484317	-1.92593	-1.27895	0.068969	-0.373857	-0.0430855	0.158255	-0.343121	-0.424813	0.0385571	0.0283977	0.250058	0.106772	0.0317404	0.110329	0.312537
25797	QPCT	-0.285592	0.104125	-2.74277	0.00609228	0.087271	0	4.3934	0.494272	-1.84981	0.629012	0.493656	-2.363	-0.920243	-1.1935	-0.3109	0.316469	0.161317	-0.422561	-0.304058	-0.679393	0.028248	0.25313	0.106785	0.031978	0.109171	0.324039
4815	NINJ2	0.285378	0.104083	2.74183	0.00610976	0.0873822	0	3.42871	0.634201	2.8911	0.332246	0.282876	1.36115	0.395445	-0.623221	0.490181	0.16641	0.0923384	0.241613	0.130063	-0.350095	0.0287467	0.250865	0.106555	0.0315086	0.108177	0.315564
9488	PIGB	-0.284972	0.104044	-2.73895	0.00616363	0.0877407	0	2.75827	0.737192	-2.00058	-1.64644	0.230832	-1.78239	-0.509466	-0.239285	-0.336583	-0.860475	0.0753366	-0.317214	-0.167679	-0.13386	0.0283057	0.273138	0.106517	0.0316736	0.108324	0.312948
3437	IFIT3	-0.433487	0.15834	-2.7377	0.00618699	0.0877407	43.0296	8.77648	0.118319	-4.26465	-1.84089	-0.775881	-1.50114	-1.64243	1.09392	-0.736118	-0.973432	-0.254144	-0.266672	-0.549482	0.62088	0.0297939	0.279612	0.107292	0.0315583	0.111927	0.322137
29855	UBN1	-0.340548	0.124479	-2.73579	0.00622315	0.0877407	18.2415	6.11557	0.295135	-2.31882	-0.344485	-0.528644	-1.66371	-2.74084	0.979871	-0.391073	-0.172563	-0.172791	-0.295853	-0.948645	0.554459	0.0284434	0.250931	0.106835	0.0316225	0.119796	0.320186
5265	SERPINA1	-0.284127	0.103885	-2.73502	0.00623772	0.0877407	0	0.960988	0.965651	-1.43458	-0.0786276	-0.53178	-1.90361	-1.10213	-1.12066	-0.240537	-0.0393176	-0.17382	-0.339088	-0.365048	-0.636539	0.0281133	0.250048	0.10684	0.0317297	0.109708	0.32263
2932	GSK3B	-0.28401	0.103863	-2.73446	0.00624829	0.0877407	0	0.598728	0.988061	-1.50799	-0.963338	-0.834055	-1.63065	-0.601114	-1.07607	-0.25294	-0.488809	-0.273369	-0.289912	-0.197976	-0.610443	0.0281345	0.257467	0.107426	0.0316089	0.10847	0.321816
5538	PPT1	-0.28424	0.103954	-2.73429	0.00625159	0.0877407	0	1.50144	0.912903	-1.79597	0.413509	-0.815951	-1.9829	-0.987558	0.0912165	-0.301748	0.207309	-0.267382	-0.353426	-0.326578	0.0509969	0.0282285	0.251343	0.107383	0.0317685	0.109358	0.312565
7409	VAV1	-0.284517	0.104069	-2.73392	0.00625859	0.0877407	0	4.60937	0.465384	-1.72362	0.704122	-1.35244	-1.07743	-1.27368	-2.00121	-0.289461	0.35482	-0.446649	-0.190991	-0.423024	-1.1793	0.0282033	0.253934	0.109068	0.031423	0.110309	0.347269
6883	TAF12	-0.284045	0.103909	-2.73359	0.00626481	0.0877407	0	0.989069	0.963443	-1.51542	-0.467962	-0.262779	-1.74832	-1.59512	-0.525361	-0.254198	-0.234786	-0.0857722	-0.311076	-0.533098	-0.294704	0.0281367	0.251723	0.106539	0.0316585	0.111694	0.314671
4296	MAP3K11	-0.284709	0.104155	-2.73351	0.00626628	0.0877407	0	4.43528	0.48859	-1.71179	0.633	0.1261	-2.42858	-1.59187	0.358491	-0.287455	0.3185	0.0411452	-0.434561	-0.531976	0.200725	0.0281993	0.25317	0.106465	0.0320182	0.111678	0.313507
3632	INPP5A	-0.286293	0.104739	-2.73339	0.00626855	0.0877407	0.560205	5.02817	0.412452	-1.13713	1.17686	-0.942678	-2.14939	-1.4519	-1.51205	-0.190408	0.601591	-0.309368	-0.383624	-0.483799	-0.870503	0.0280383	0.26131	0.107702	0.0318554	0.111034	0.331444
171558	PTCRA	-0.283945	0.103898	-2.73293	0.0062774	0.0877407	0	0.837999	0.974547	-2.17687	-0.795483	-1.03155	-1.17022	-0.306293	-0.638744	-0.36672	-0.401734	-0.33893	-0.207525	-0.100699	-0.358904	0.0283793	0.255043	0.107954	0.0314488	0.108088	0.31572
353345	GPR141	-0.283902	0.103894	-2.7326	0.00628361	0.0877407	0	1.21659	0.943276	-1.07569	-0.93203	-1.03645	-1.84761	-0.755184	-1.2648	-0.180077	-0.472472	-0.340561	-0.328976	-0.249063	-0.721623	0.028025	0.256976	0.107969	0.0317033	0.108771	0.325518
58528	RRAGD	-0.299659	0.109676	-2.73222	0.00629088	0.0877407	5.15995	5.27203	0.383591	-2.62112	-0.734182	0.0925446	-2.43577	0.780745	-0.245421	-0.443229	-0.370222	0.0301949	-0.435878	0.25756	-0.137298	0.0285945	0.254283	0.106455	0.0320227	0.108827	0.312971
84334	APOPT1	0.284237	0.104011	2.73277	0.00628038	0.0877407	0	2.44962	0.784062	1.37134	0.617918	1.94227	1.5627	1.07074	-0.54254	0.229862	0.310819	0.650014	0.277711	0.35449	-0.304411	0.0280958	0.253019	0.112002	0.0315818	0.109608	0.314817
54674	LRRN3	0.284491	0.104085	2.73325	0.0062712	0.0877407	0	4.39867	0.493554	2.82565	-0.052722	0.674105	0.572844	0.485202	1.69242	0.478764	-0.0263622	0.220591	0.10138	0.159667	0.981902	0.0287083	0.250022	0.107083	0.0313207	0.10829	0.336603
116224	FAM122A	0.284774	0.104047	2.73696	0.00620089	0.0877407	0	2.88475	0.717748	1.80578	-0.101618	0.932101	2.44398	0.0566311	-0.509386	0.303415	-0.0508172	0.305856	0.437383	0.0186074	-0.285683	0.028232	0.250081	0.107673	0.0320278	0.107959	0.31454
51266	CLEC1B	-0.290565	0.106545	-2.72716	0.00638816	0.0889596	2.25665	5.11544	0.401955	-2.73522	-0.153189	0.776257	-1.8475	-0.13719	-1.23387	-0.463027	-0.0766224	0.254268	-0.328955	-0.0450814	-0.703268	0.0286568	0.250183	0.107293	0.0317032	0.107981	0.324865
79616	CCNJL	-0.381503	0.139974	-2.72552	0.00642007	0.0889906	30.5573	7.20018	0.206173	-2.81879	1.78814	-1.02907	-2.80901	-1.38009	-1.06344	-0.477569	0.942394	-0.338104	-0.504648	-0.459239	-0.603066	0.0287043	0.277753	0.107947	0.0322754	0.11073	0.321592
56894	AGPAT3	0.618875	0.227054	2.72567	0.00641709	0.0889906	70.4993	16.9487	0.00459808	6.01179	2.25638	1.78498	4.48593	-1.13505	0.364497	1.07404	1.2303	0.594965	0.826546	-0.37614	0.204099	0.0319178	0.297301	0.1111	0.0339492	0.109816	0.313541
5093	PCBP1	0.426011	0.156256	2.72636	0.00640372	0.0889906	42.0545	8.6288	0.124818	4.35348	0.996349	1.25383	1.32841	-0.381032	1.78495	0.752519	0.506086	0.413366	0.235762	-0.125313	1.0401	0.0298787	0.258004	0.108691	0.0314977	0.108161	0.339545
60481	ELOVL5	-0.283352	0.103986	-2.7249	0.00643203	0.0890193	0	2.03298	0.844563	-2.45461	0.0134982	0.077231	-1.75552	-0.4829	-0.334298	-0.41445	0.00674911	0.025198	-0.312373	-0.158908	-0.18714	0.0285088	0.250001	0.106451	0.0316617	0.108287	0.313376
51734	MSRB1	-0.336923	0.123734	-2.72297	0.00646973	0.0894035	17.8478	6.08626	0.297915	-3.10313	0.128545	0.772158	-2.78245	-0.546744	-0.59963	-0.52733	0.0642893	0.252915	-0.499728	-0.179995	-0.33672	0.0288779	0.250129	0.107284	0.032256	0.108381	0.315335
84193	SETD3	-0.283461	0.104158	-2.72145	0.0064997	0.0896799	0	4.51507	0.47787	-1.33369	-1.07948	-2.11662	-2.00175	0.645163	-0.272019	-0.223511	-0.549845	-0.711859	-0.356839	0.21256	-0.152204	0.0280858	0.259448	0.11311	0.0317779	0.108549	0.313079
10666	CD226	-0.337012	0.123866	-2.72078	0.00651282	0.0897233	17.9465	6.09358	0.297219	-2.28391	-0.263882	-0.821183	-3.47034	0.606303	0.195332	-0.385076	-0.132085	-0.269112	-0.628743	0.199693	0.109246	0.0284273	0.250545	0.107395	0.0328248	0.108479	0.312798
51507	RTF2	-0.283103	0.104139	-2.71851	0.00655766	0.0900669	0	4.55788	0.472176	-1.50181	-0.0428338	-1.03672	-0.844943	-2.71695	-0.721366	-0.251896	-0.0214175	-0.340653	-0.149648	-0.939485	-0.405905	0.0281327	0.250014	0.107969	0.031368	0.119568	0.316619
3557	IL1RN	-0.283039	0.104116	-2.7185	0.00655778	0.0900669	0	4.25711	0.513023	-2.7279	-0.836709	0.484807	-0.718628	-1.3472	-0.969238	-0.461756	-0.423007	0.158416	-0.127227	-0.448024	-0.548297	0.0286527	0.255592	0.106773	0.0313438	0.110596	0.320016
90861	JPT2	0.282538	0.103964	2.71764	0.00657493	0.0901647	0	1.88391	0.864964	1.66928	1.62105	0.12428	1.75199	0.535888	0.695046	0.280245	0.846008	0.040551	0.311737	0.176407	0.39091	0.0281851	0.272367	0.106464	0.0316602	0.108364	0.31632
84148	KAT8	-0.282376	0.104004	-2.71506	0.00662643	0.0906485	0	2.40155	0.791244	-1.47124	-0.669211	-0.0934399	-2.39178	-1.08026	0.514223	-0.246729	-0.336972	-0.030487	-0.427824	-0.35769	0.288414	0.0281238	0.253548	0.106455	0.0319955	0.109638	0.31458
3074	HEXB	-0.282394	0.104018	-2.71486	0.00663036	0.0906485	0	2.67929	0.749284	-1.49368	-1.00172	-0.291554	-2.37235	-0.769627	0.714058	-0.250521	-0.5089	-0.0951742	-0.42427	-0.253863	0.401739	0.0281303	0.258093	0.106562	0.0319837	0.108803	0.316535
526	ATP6V1B2	-0.282315	0.104034	-2.71367	0.00665423	0.0906991	0	2.87099	0.719868	-1.02292	0.0262263	-0.241893	-2.29226	-1.92346	-0.418658	-0.171211	0.0131133	-0.0789492	-0.409642	-0.647948	-0.234551	0.0280142	0.250005	0.106525	0.031936	0.113479	0.313875
57560	IFT80	0.282221	0.103999	2.71368	0.00665409	0.0906991	0	2.44611	0.784588	1.86019	-0.925408	0.647277	1.9192	0.926052	0.730501	0.312665	-0.469023	0.211762	0.341903	0.305999	0.411114	0.0282518	0.256874	0.107033	0.0317372	0.109187	0.316725
80228	ORAI2	-0.313017	0.115418	-2.71202	0.00668743	0.0908763	10.4136	5.58121	0.349124	-2.20107	-1.36799	-0.287593	-2.75203	0.895093	-0.369404	-0.370866	-0.704918	-0.09388	-0.494096	0.295658	-0.206856	0.02839	0.265528	0.106559	0.0322342	0.109105	0.31357
56941	HMCES	0.282013	0.103985	2.71206	0.00668656	0.0908763	0	2.13822	0.829709	2.32355	0.0127033	1.16108	1.55754	-0.289359	0.48652	0.391886	0.00635167	0.382213	0.276785	-0.0951255	0.272781	0.0284456	0.250001	0.108365	0.0315798	0.108074	0.31436
51339	DACT1	-0.358274	0.132235	-2.70938	0.00674088	0.0914523	25.0171	6.66819	0.24651	-4.04653	0.149762	0.0334286	-2.33896	-0.395206	0.0220201	-0.696134	0.0749074	0.0109064	-0.418168	-0.129984	0.0123097	0.029595	0.250175	0.106444	0.0319636	0.108177	0.312504
2773	GNAI3	-0.281907	0.104066	-2.70893	0.00675015	0.0914523	0	3.78246	0.581142	-2.34768	0.0238878	0.0766381	-0.843156	-1.88204	-1.16178	-0.396034	0.011944	0.0250046	-0.149331	-0.633306	-0.660695	0.028457	0.250004	0.106451	0.0313677	0.113232	0.323413
256435	ST6GALNAC3	-0.281519	0.103985	-2.7073	0.00678331	0.091762	0	2.42412	0.787877	-1.60283	-1.76061	-0.193425	-1.69492	-0.409031	-1.00364	-0.268987	-0.926313	-0.0631213	-0.301465	-0.134541	-0.568255	0.0281636	0.276814	0.106495	0.0316356	0.108193	0.320573
6374	CXCL5	-0.376424	0.139066	-2.70681	0.00679341	0.091762	30.0229	7.1452	0.210064	-2.65435	-1.13531	0.863988	-3.09883	-1.91125	0.430079	-0.448988	-0.579443	0.283275	-0.558645	-0.643628	0.240979	0.0286124	0.260492	0.107498	0.0324996	0.113405	0.313952
4694	NDUFA1	0.281268	0.10398	2.70501	0.00683021	0.0921208	0	2.08027	0.83793	1.79929	0.81333	-0.42242	2.14886	0.722528	0.424663	0.302311	0.410934	-0.137979	0.383528	0.238216	0.237931	0.0282297	0.255277	0.106693	0.0318551	0.108701	0.313915
8807	IL18RAP	-0.280677	0.103896	-2.70153	0.00690212	0.0929513	0	2.03189	0.844714	-1.24513	-0.73587	-0.885221	-1.55028	-0.844438	-1.82709	-0.208586	-0.371088	-0.290309	-0.275483	-0.278763	-1.06686	0.0280635	0.254303	0.107552	0.031577	0.108977	0.340955
130589	GALM	-0.28099	0.10404	-2.70079	0.00691756	0.09302	0	3.29562	0.654512	-1.47676	-0.845074	-1.38594	-1.41332	-1.68641	0.965712	-0.247662	-0.427332	-0.457996	-0.250945	-0.564763	0.546255	0.0281254	0.255707	0.109203	0.0315265	0.112151	0.31996
51170	HSD17B11	-0.280961	0.104049	-2.70029	0.00692791	0.0930201	0	3.02313	0.69642	-1.41613	-0.231559	0.332324	-2.69912	-0.917457	-0.135008	-0.237422	-0.115876	0.108501	-0.484316	-0.303127	-0.0754889	0.0281081	0.25042	0.106597	0.0321968	0.109164	0.312642
2983	GUCY1B1	-0.280534	0.103922	-2.69945	0.00694538	0.0931157	0	1.54139	0.908244	-1.74889	-0.919501	-0.223349	-1.98543	-0.0732825	-0.962889	-0.293752	-0.465947	-0.0728929	-0.353884	-0.0240789	-0.54462	0.028212	0.256785	0.106512	0.0317697	0.107962	0.319915
6197	RPS6KA3	-0.280529	0.103983	-2.69783	0.00697939	0.0934324	0	2.39653	0.791991	-1.4938	-1.34667	-0.301558	-2.1577	0.0808898	-0.936318	-0.250541	-0.693267	-0.098444	-0.385136	0.0265786	-0.529249	0.0281303	0.265019	0.10657	0.03186	0.107964	0.319503
10023	FRAT1	-0.280461	0.104044	-2.69561	0.00702604	0.0939172	0	2.95414	0.707056	-1.57897	-1.12797	0.0726588	-2.53366	-0.160144	0.0679688	-0.264948	-0.575544	0.0237062	-0.453837	-0.0526264	0.0379979	0.0281561	0.260352	0.10645	0.0320851	0.107991	0.312536
170591	S100Z	-0.28009	0.103965	-2.69409	0.00705816	0.0942066	0	1.90004	0.862797	-1.18476	0.0344844	-1.0098	-2.34418	-1.07398	0.291509	-0.198422	0.0172425	-0.331687	-0.419122	-0.35558	0.163132	0.0280491	0.250009	0.10789	0.0319667	0.109618	0.313165
22954	TRIM32	0.279859	0.103988	2.69127	0.00711812	0.0948661	0	2.42069	0.788389	2.03861	1.6853	0.370054	0.825838	1.13006	0.755951	0.343075	0.882733	0.120841	0.146255	0.374458	0.425641	0.0283211	0.274351	0.106635	0.0313641	0.1098	0.317029
5817	PVR	-0.279717	0.104068	-2.68782	0.00719197	0.0956116	0	3.51102	0.621722	-1.00432	-0.69134	-0.317215	-2.17465	-2.05618	0.437293	-0.168086	-0.348281	-0.103562	-0.388217	-0.695199	0.24504	0.0280105	0.253791	0.106584	0.0318693	0.114314	0.314001
6282	S100A11	-0.34525	0.128457	-2.68767	0.00719531	0.0956116	21.6972	6.38547	0.270497	-2.2593	-1.76255	0.769793	-3.09688	-0.443286	-0.349953	-0.380852	-0.927443	0.252134	-0.558281	-0.145837	-0.19593	0.028416	0.27688	0.107279	0.032498	0.108234	0.31346
10092	ARPC5	-0.279482	0.104084	-2.68516	0.00724957	0.0959075	0	3.70081	0.593244	-1.00142	-0.20369	-0.112903	-3.06762	-0.33214	-0.57723	-0.167599	-0.101911	-0.0368381	-0.552804	-0.109209	-0.324034	0.0280099	0.250325	0.10646	0.0324743	0.108111	0.315125
1951	CELSR3	0.278968	0.103875	2.68562	0.00723958	0.0959075	0	0.799798	0.977046	2.21914	0.175591	0.483635	1.44489	0.478207	0.711779	0.373963	0.087838	0.158032	0.256597	0.157359	0.40044	0.028398	0.250241	0.106771	0.0315377	0.10828	0.316509
8568	RRP1	0.279116	0.103924	2.68578	0.00723612	0.0959075	0	1.34791	0.929925	2.27563	0.812267	1.07973	1.21321	0.0313241	0.290516	0.383654	0.410386	0.355001	0.215191	0.010292	0.162575	0.0284235	0.255263	0.108101	0.0314614	0.107956	0.313161
2000	ELF4	-0.279214	0.104049	-2.68348	0.00728604	0.0962484	0	3.10826	0.6833	-1.00219	-1.1136	-0.395174	-2.77303	-0.428606	0.187828	-0.167729	-0.567913	-0.12906	-0.497983	-0.140995	0.105045	0.0280101	0.260079	0.106662	0.0322492	0.108216	0.312776
9463	PICK1	-0.279186	0.104125	-2.68127	0.00733438	0.0963228	0	4.29574	0.507669	-2.53372	0.368115	0.230264	-1.33771	-1.73348	0.286772	-0.428108	0.184448	0.0751512	-0.237422	-0.581165	0.160475	0.0285488	0.251063	0.106517	0.0315007	0.112399	0.313144
115207	KCTD12	-0.278872	0.104018	-2.68099	0.00734053	0.0963228	0	3.00721	0.698875	-2.00154	-0.250202	-1.05255	-1.14793	-1.73497	0.830908	-0.336748	-0.125223	-0.34593	-0.203551	-0.581685	0.468553	0.0283061	0.25049	0.108017	0.0314424	0.112407	0.317989
7431	VIM	-0.278654	0.103944	-2.68081	0.00734453	0.0963228	0	1.69508	0.889519	-1.5149	0.244431	-0.959748	-2.07578	-1.08831	0.335748	-0.254108	0.12233	-0.315038	-0.370258	-0.3604	0.187954	0.0281366	0.250468	0.107748	0.0318161	0.109664	0.313383
51191	HERC5	-0.434942	0.162247	-2.68074	0.00734586	0.0963228	44.9829	9.08808	0.105602	-3.38412	-2.81314	-1.07712	-1.2128	-1.60631	0.803765	-0.576974	-1.62126	-0.354128	-0.215118	-0.536971	0.452991	0.0290683	0.33214	0.108093	0.0314613	0.111748	0.31763
51380	CSAD	-0.27895	0.104088	-2.67995	0.00736327	0.0963228	0	4.02155	0.546318	-1.2451	-0.884412	-1.77942	-2.08092	0.694807	-0.944415	-0.20858	-0.447711	-0.593032	-0.37119	0.229017	-0.53393	0.0280634	0.256264	0.11107	0.0318188	0.108645	0.319627
64397	ZNF106	-0.278647	0.104002	-2.67924	0.00737904	0.0963228	0	2.99065	0.701427	-1.6092	0.596462	-1.42443	-1.08324	-1.66245	-1.12139	-0.270067	0.299903	-0.471058	-0.192025	-0.556433	-0.636969	0.0281656	0.252811	0.109362	0.0314246	0.112028	0.322643
7317	UBA1	-0.689674	0.257442	-2.67895	0.00738533	0.0963228	76.4218	21.206	0.000740578	-5.02146	2.02787	-2.02005	-3.16885	-4.7254	-1.45567	-0.878262	1.08612	-0.677491	-0.571779	-1.84756	-0.836192	0.0305907	0.286864	0.112482	0.0325576	0.152869	0.32998
55353	LAPTM4B	-0.278176	0.103842	-2.67883	0.00738803	0.0963228	0	0.687755	0.983634	-1.62661	-0.723707	-1.12067	-1.25764	-0.698084	-1.1702	-0.273015	-0.364852	-0.368683	-0.223121	-0.230104	-0.665654	0.0281712	0.25416	0.108231	0.031475	0.108651	0.323577
84138	SLC7A6OS	0.278846	0.104084	2.67905	0.00738311	0.0963228	0	3.6579	0.599641	2.87765	0.317351	-0.400263	1.48512	0.197285	0.221105	0.487834	0.158926	-0.130726	0.263802	0.0648376	0.123677	0.0287387	0.250789	0.106667	0.0315524	0.10801	0.312882
149371	EXOC8	-0.278324	0.103933	-2.6779	0.00740845	0.0964104	0	1.55063	0.907154	-1.98484	0.228389	-0.742979	-1.47183	-1.40465	0.196678	-0.333899	0.114288	-0.243286	-0.261422	-0.467627	0.109999	0.0282995	0.250408	0.107221	0.0315475	0.110832	0.312802
3613	IMPA2	-0.278682	0.104081	-2.67755	0.00741618	0.0964104	0	3.93521	0.558781	-2.0063	0.0604712	0.820208	-1.86208	-1.45632	-0.902594	-0.337559	0.0302373	0.26879	-0.331586	-0.485315	-0.509784	0.028308	0.250029	0.107393	0.03171	0.111054	0.318997
5681	PSKH1	0.328281	0.122637	2.67685	0.00743176	0.0964735	16.9688	6.02183	0.3041	3.78654	0.571246	0.97369	0.661445	0.742552	-0.436631	0.648978	0.287091	0.319672	0.117085	0.244866	-0.244668	0.0293748	0.252576	0.107787	0.0313341	0.108743	0.313997
345757	FAM174A	-0.278513	0.104101	-2.6754	0.00746392	0.0967514	0	4.01551	0.547186	-2.61652	0.324891	0.253798	-1.76582	-0.876955	0.519589	-0.442433	0.162714	0.0828381	-0.314228	-0.289605	0.291444	0.0285921	0.250827	0.106533	0.0316662	0.109058	0.314623
4126	MANBA	-0.277725	0.103944	-2.67187	0.00754292	0.0976347	0	1.68518	0.890761	-1.81419	-0.339006	-0.567194	-2.2443	-0.106504	0.218963	-0.304843	-0.169808	-0.185443	-0.400898	-0.034996	0.122477	0.0282351	0.250901	0.106895	0.0319084	0.107971	0.312875
55276	PGM2	-0.277469	0.103938	-2.66957	0.00759479	0.0980417	0	1.77843	0.878875	-1.19729	-0.875843	0.0600273	-2.05925	-1.42728	-0.650544	-0.20053	-0.443267	0.0195847	-0.36726	-0.475366	-0.365604	0.028052	0.25614	0.106448	0.0318074	0.110928	0.315842
10261	IGSF6	-0.27729	0.103892	-2.66902	0.00760729	0.0980417	0	1.36203	0.928422	-1.48032	-1.09169	-0.140139	-1.51509	-1.30425	-1.04228	-0.248264	-0.556301	-0.0457272	-0.269173	-0.433408	-0.590732	0.0281264	0.259671	0.10647	0.0315636	0.110426	0.321224
175	AGA	-0.277467	0.103979	-2.6685	0.00761913	0.0980417	0	2.2722	0.810341	-0.997603	-1.19919	-1.5406	-1.82417	-1.04974	0.395999	-0.166958	-0.613542	-0.510665	-0.324745	-0.347436	0.221805	0.0280092	0.261764	0.109874	0.0316925	0.109543	0.31373
29950	SERTAD1	-0.27788	0.104143	-2.66827	0.00762439	0.0980417	0	4.69205	0.454606	-0.733103	-0.00754915	-1.38746	-1.90601	-2.3665	0.340539	-0.122594	-0.00377458	-0.458511	-0.33952	-0.807882	0.190644	0.0279646	0.25	0.109209	0.0317308	0.116542	0.313409
23673	STX12	-0.277389	0.103966	-2.66807	0.00762886	0.0980417	0	2.10304	0.834712	-1.94836	-0.317987	0.372168	-2.15811	-0.525397	-0.502443	-0.327678	-0.159245	0.121532	-0.38521	-0.172941	-0.281765	0.0282852	0.250792	0.106637	0.0318602	0.108348	0.314485
52	ACP1	-0.277728	0.104122	-2.66734	0.00764543	0.0981146	0	4.50948	0.478616	-2.52097	-1.30518	0.0354605	-0.325886	-1.69116	-0.773234	-0.425904	-0.670687	0.0115693	-0.0576491	-0.566415	-0.435518	0.0285422	0.264057	0.106444	0.0312935	0.112176	0.317242
3340	NDST1	-0.276882	0.103875	-2.66553	0.00768678	0.0983646	0	0.742275	0.980568	-1.99235	-0.51326	-0.149295	-1.71626	-0.785103	-0.173685	-0.335181	-0.257693	-0.0487153	-0.305305	-0.259009	-0.0971293	0.0283025	0.252075	0.106474	0.0316447	0.108837	0.312736
4691	NCL	0.277451	0.104083	2.66566	0.00768366	0.0983646	0	4.53744	0.47489	1.31688	2.07217	1.45879	0.981231	0.425505	1.53076	0.220676	1.11348	0.482744	0.173871	0.139973	0.881941	0.0280815	0.288745	0.109509	0.0313986	0.108212	0.331946
1992	SERPINB1	-0.36849	0.138365	-2.66317	0.00774076	0.0987743	29.6875	7.11111	0.212507	-2.87326	-0.494052	1.08138	-3.2204	-0.838797	-1.27904	-0.487068	-0.247973	0.355553	-0.581471	-0.276883	-0.730094	0.0287361	0.251922	0.108106	0.0326013	0.108963	0.325826
29789	OLA1	0.408877	0.15353	2.66317	0.00774075	0.0987743	39.9504	8.32645	0.139138	2.43841	2.18607	2.3004	-0.0322748	1.2743	0.996366	0.411656	1.18511	0.778097	-0.00570824	0.423234	0.564029	0.0285008	0.29389	0.114409	0.0312807	0.110311	0.320453
255488	RNF144B	-0.329818	0.124011	-2.6596	0.00782343	0.0994518	18.0189	6.09897	0.296708	-1.94643	-0.787284	1.14433	-2.97414	-1.25627	-0.933029	-0.327351	-0.39751	0.376601	-0.535346	-0.417118	-0.527349	0.0282845	0.254938	0.108309	0.0324001	0.110244	0.319452
83716	CRISPLD2	-0.276572	0.103996	-2.65944	0.00782702	0.0994518	0	2.56682	0.766401	-1.09201	0.236805	-1.55471	-1.67561	-1.77822	-0.0636625	-0.18282	0.118506	-0.515497	-0.297992	-0.596806	-0.0355902	0.0280284	0.250439	0.109939	0.0316274	0.112641	0.312532
11146	GLMN	0.276588	0.103996	2.6596	0.00782326	0.0994518	0	3.19881	0.669365	0.578735	0.988981	0.488536	2.4631	0.805105	1.41617	0.0967455	0.502225	0.159638	0.440888	0.265664	0.812289	0.0279449	0.257882	0.106778	0.0320399	0.108883	0.328995
22921	MSRB2	-0.276631	0.104054	-2.65852	0.00784842	0.0995571	0	3.36529	0.643862	-0.393875	-0.79243	-0.921168	-2.83834	-0.783913	-0.36151	-0.0658224	-0.40016	-0.302228	-0.510088	-0.258614	-0.202421	0.0279274	0.255004	0.107644	0.0322969	0.108835	0.313524
56996	SLC12A9	-0.276322	0.103953	-2.65814	0.00785744	0.0995571	0	2.26826	0.810918	-0.628362	-0.373028	-1.2984	-1.88203	-1.63284	-0.951803	-0.105052	-0.186921	-0.428388	-0.335188	-0.546157	-0.538204	0.0279507	0.251092	0.108857	0.0317194	0.111879	0.319742
114885	OSBPL11	-0.276262	0.104024	-2.65574	0.00791338	0.0998039	0	2.96144	0.705931	-2.28715	-1.0708	0.221472	-1.00702	-1.60389	-0.0336605	-0.385632	-0.545256	0.0722797	-0.178459	-0.536133	-0.018817	0.0284287	0.259291	0.106511	0.031405	0.111737	0.312509
79089	TMUB2	-0.320691	0.120787	-2.65502	0.00793042	0.0998039	15.1005	5.88932	0.317138	-2.35598	-1.08198	0.190808	-1.01762	-2.70324	-0.00539524	-0.397462	-0.551164	0.062267	-0.180345	-0.934236	-0.00301603	0.0284609	0.259493	0.106494	0.0314076	0.119439	0.3125
196	AHR	-0.276349	0.104089	-2.65493	0.00793241	0.0998039	0	3.81384	0.576518	-1.20809	-0.146289	-0.305652	-3.04308	-0.123159	0.112715	-0.202349	-0.0731687	-0.099782	-0.548215	-0.0404697	0.0630196	0.0280546	0.250167	0.106574	0.0324545	0.107976	0.312599
348093	RBPMS2	-0.27603	0.103973	-2.65482	0.0079351	0.0998039	0	2.45857	0.782721	-1.64898	0.102155	-0.822019	-2.28666	0.312172	-0.880399	-0.276805	0.0510856	-0.269388	-0.408619	0.102635	-0.496997	0.0281784	0.250082	0.107397	0.0319328	0.108093	0.318675
3434	IFIT1	-0.457405	0.172316	-2.65446	0.00794348	0.0998039	50.574	10.1161	0.0720107	-3.72441	-1.95152	-1.06856	-1.49347	-2.57874	1.43635	-0.637787	-1.03958	-0.351274	-0.265298	-0.886974	0.824485	0.0293248	0.283773	0.108066	0.0315555	0.118306	0.329494
79018	GID4	0.430855	0.162208	2.6562	0.00790273	0.0998039	45.4419	9.16455	0.102678	4.06738	1.22371	1.74685	3.00245	-1.18948	0.28656	0.699938	0.626696	0.581717	0.540626	-0.394511	0.160357	0.0296135	0.262273	0.110895	0.0324223	0.110002	0.313143
10627	MYL12A	-0.275658	0.103876	-2.65372	0.0079611	0.0998857	0	0.856115	0.973317	-1.23235	-0.71951	-0.343346	-2.12398	-1.05379	-0.349733	-0.206433	-0.362701	-0.112105	-0.379007	-0.348794	-0.195806	0.0280604	0.254111	0.106608	0.0318417	0.109555	0.313459
79760	GEMIN7	-0.275887	0.104013	-2.65244	0.0079912	0.100124	0	4.29434	0.507862	-0.947355	0.109993	-0.640231	-1.67852	-1.75245	-2.03022	-0.158522	0.055007	-0.209445	-0.298515	-0.587789	-1.19835	0.0279996	0.250095	0.10702	0.0316286	0.112501	0.348401
29924	EPN1	0.354934	0.133986	2.64903	0.00807231	0.100999	26.3886	6.79242	0.236542	4.00384	1.31246	0.0334839	1.64941	-0.130963	0.393428	0.688354	0.67464	0.0109244	0.293282	-0.0430348	0.22036	0.0295576	0.264223	0.106444	0.0316165	0.107979	0.313714
2011	MARK2	-0.277659	0.105006	-2.64421	0.00818817	0.102307	0.794415	5.04004	0.411013	-1.93625	0.734719	-0.290743	-1.33846	-2.44743	0.0176444	-0.325615	0.370498	-0.0949092	-0.237556	-0.837833	0.00986355	0.0282805	0.25429	0.106561	0.031501	0.117191	0.312502
23163	GGA3	-0.274965	0.104016	-2.64349	0.00820552	0.102381	0	3.57672	0.611812	-0.924685	-0.447383	-0.145739	-2.70496	-0.318599	-1.43875	-0.154717	-0.224394	-0.0475547	-0.485395	-0.10475	-0.825942	0.0279955	0.251574	0.106472	0.0322009	0.108099	0.329555
10509	SEMA4B	-0.432209	0.16354	-2.64283	0.00822168	0.102441	46.0633	9.27013	0.0987628	-1.95808	-1.55537	0.889622	-3.04097	-1.57563	-2.45574	-0.329335	-0.808859	0.291767	-0.547821	-0.526364	-1.48968	0.028289	0.270445	0.107563	0.0324528	0.1116	0.367979
23597	ACOT9	-0.274579	0.103922	-2.64217	0.00823765	0.102498	0	1.55263	0.906918	-2.10404	-0.625751	0.215908	-1.51029	-1.16273	-0.188704	-0.354256	-0.314808	0.0704627	-0.268312	-0.385475	-0.105536	0.0283481	0.253097	0.106508	0.0315618	0.10991	0.312778
94241	TP53INP1	-0.274529	0.103949	-2.641	0.00826624	0.102711	0	2.0291	0.845104	-1.88836	-0.89777	-1.8644	-0.914324	-0.246391	-0.509312	-0.31746	-0.454647	-0.622675	-0.161975	-0.0809876	-0.285642	0.0282623	0.25646	0.111544	0.031383	0.108041	0.31454
9871	SEC24D	-0.274225	0.103894	-2.63946	0.00830376	0.103035	0	1.1862	0.946195	-1.26188	0.00604803	-0.472933	-2.25728	-1.06495	-0.327878	-0.211407	0.00302402	-0.154524	-0.403262	-0.352544	-0.183536	0.0280676	0.25	0.106757	0.0319158	0.10959	0.313342
84299	MIEN1	-0.274543	0.104045	-2.63871	0.00832222	0.103122	0	3.72837	0.589147	-2.20231	-0.954937	-0.0217632	-1.55004	-1.16715	1.07877	-0.371078	-0.484421	-0.0071004	-0.275441	-0.386969	0.612017	0.0283905	0.257333	0.106443	0.0315769	0.109925	0.321864
9489	PGS1	-0.274316	0.103994	-2.63782	0.00834409	0.103251	0	2.95841	0.706398	-1.45971	0.402212	-0.163194	-2.52027	-0.332894	-1.06526	-0.244781	0.201616	-0.0532523	-0.451377	-0.109457	-0.604128	0.0281204	0.25127	0.10648	0.0320764	0.108112	0.321624
3840	KPNA4	0.483772	0.183476	2.6367	0.00837168	0.10345	56.293	11.4398	0.0433244	4.747	0.185831	1.21247	4.86653	0.0708483	-0.602204	0.826056	0.0929656	0.399457	0.903516	0.023279	-0.338179	0.0302817	0.25027	0.108542	0.0344694	0.107962	0.315359
5982	RFC2	-0.276675	0.104968	-2.63581	0.00839364	0.103575	0.761236	5.03835	0.411217	-2.29416	-0.968144	1.10242	-1.81427	-1.1798	0.189401	-0.386835	-0.491321	0.36258	-0.322961	-0.39124	0.105926	0.028432	0.257544	0.108172	0.031688	0.109969	0.312781
10956	OS9	-0.2743	0.104084	-2.63536	0.00840483	0.103575	0	4.02607	0.545668	-1.42456	0.776493	-0.340272	-1.80402	-2.19135	-0.408121	-0.238844	0.391957	-0.1111	-0.321113	-0.743885	-0.228623	0.0281105	0.254801	0.106605	0.0316833	0.115236	0.313807
29916	SNX11	-0.328226	0.124703	-2.63206	0.00848701	0.104445	18.583	6.14122	0.292719	-1.48869	-1.8873	0.000461221	-3.30364	-0.199815	0.0920646	-0.249678	-1.001	0.000150476	-0.59716	-0.0656692	0.0514711	0.0281288	0.281313	0.106443	0.0326735	0.108011	0.312566
29097	CNIH4	-0.273584	0.103973	-2.63129	0.00850611	0.104537	0	2.46532	0.781709	-2.29207	0.15918	0.189385	-1.8864	-0.276826	-0.662628	-0.386478	0.0796213	0.0618026	-0.335978	-0.0910011	-0.372471	0.028431	0.250198	0.106493	0.0317215	0.108064	0.315968
30817	ADGRE2	-0.273402	0.10394	-2.63038	0.0085289	0.104637	0	2.25979	0.812155	-1.18437	-0.270022	0.121531	-2.11136	-1.46892	-1.03571	-0.198356	-0.135165	0.0396541	-0.376717	-0.489637	-0.586905	0.028049	0.250571	0.106463	0.0318349	0.111109	0.321111
5569	PKIA	0.273491	0.103987	2.63004	0.00853755	0.104637	0	3.03658	0.694346	2.49899	-0.225001	-0.206276	1.31301	0.688224	1.19075	0.422108	-0.112589	-0.0673176	0.233009	0.226834	0.677772	0.0285311	0.250396	0.106502	0.0314926	0.108632	0.323984
84498	FAM120B	-0.27357	0.10406	-2.62897	0.00856429	0.104822	0	3.57512	0.612053	-1.38385	0.347397	-1.99928	-2.11014	0.03223	-0.00493123	-0.231972	0.174027	-0.670138	-0.376495	0.0105897	-0.00275664	0.0280992	0.250946	0.112352	0.0318343	0.107956	0.3125
84984	CEP19	-0.27818	0.105876	-2.62741	0.00860381	0.105163	1.62309	5.08249	0.405896	-2.45781	-0.402537	1.18044	-1.80786	-1.19531	-0.159478	-0.415002	-0.20178	0.388704	-0.321804	-0.396481	-0.089179	0.0285104	0.251272	0.108431	0.0316851	0.110023	0.312699
1839	HBEGF	-0.364963	0.139031	-2.62505	0.00866361	0.10575	29.9032	7.133	0.210936	-0.685206	-1.88948	-1.92888	-1.52108	-0.733347	-2.24175	-0.114571	-1.0023	-0.645302	-0.270248	-0.241809	-1.34019	0.027958	0.281394	0.111922	0.0315658	0.108724	0.357403
6621	SNAPC4	-0.272833	0.103981	-2.62388	0.00869335	0.105969	0	2.69853	0.746343	-1.39183	-0.758307	-0.324733	-1.93626	-1.63328	0.740898	-0.233318	-0.382607	-0.106019	-0.344988	-0.546312	0.417046	0.0281014	0.254575	0.10659	0.0317455	0.111882	0.316848
9873	FCHSD2	-0.272458	0.10392	-2.6218	0.00874656	0.106003	0	2.064	0.84022	-1.30187	-0.589356	-1.18554	-2.03421	0.237913	-1.13821	-0.218146	-0.29629	-0.390416	-0.362721	0.0781987	-0.64684	0.0280776	0.252743	0.108448	0.0317945	0.108035	0.32296
4051	CYP4F3	-0.272475	0.103939	-2.62148	0.00875495	0.106003	0	2.02892	0.84513	-2.01838	-0.211934	0.446912	-1.83479	-0.91339	-0.617924	-0.339621	-0.106041	0.145999	-0.326662	-0.301768	-0.347091	0.0283129	0.250351	0.106723	0.0316974	0.109153	0.315512
3049	HBQ1	0.272832	0.104076	2.62147	0.00875502	0.106003	0	3.90392	0.563331	0.409392	-0.154577	1.14653	2.86059	0.938178	0.454851	0.0684171	-0.0773172	0.377338	0.514217	0.310053	0.25493	0.0279286	0.250187	0.108316	0.0323134	0.109219	0.314125
400961	PAIP2B	0.272762	0.104018	2.62225	0.00873516	0.106003	0	3.01477	0.697709	1.04902	-0.455696	1.24909	2.61731	0.347621	0.226895	0.175595	-0.228591	0.411769	0.469227	0.114307	0.12692	0.0280194	0.251633	0.108674	0.0321406	0.108126	0.312903
388228	SBK1	0.272525	0.103888	2.62326	0.00870919	0.106003	0	1.84085	0.8707	2.16107	0.573578	0.12911	1.14966	0.643053	1.404	0.364014	0.288275	0.0421276	0.20386	0.211861	0.804946	0.0283725	0.252597	0.106466	0.0314429	0.108545	0.328698
2213	FCGR2B	-0.382549	0.146008	-2.62006	0.0087914	0.106127	35.343	7.73312	0.17157	-2.43368	-0.58841	-0.959524	-4.21498	0.560484	-0.0233072	-0.410841	-0.29581	-0.314963	-0.772771	0.184537	-0.0130292	0.0284985	0.252734	0.107748	0.0336133	0.108403	0.312504
54918	CMTM6	-0.272315	0.103992	-2.61861	0.00882892	0.106127	0	3.15735	0.675742	-2.52831	-0.132244	0.37323	-1.08804	-0.961899	-1.16458	-0.427172	-0.0661398	0.12188	-0.19288	-0.317987	-0.662345	0.028546	0.250137	0.106638	0.0314259	0.109285	0.323468
58472	SQOR	-0.370733	0.141584	-2.61847	0.0088326	0.106127	31.8997	7.34211	0.196415	-3.15881	-1.10145	0.839422	-1.62727	-2.49585	-0.251793	-0.53713	-0.561473	0.275145	-0.289304	-0.855874	-0.140868	0.0289142	0.259852	0.107439	0.0316075	0.117593	0.312996
57085	AGTRAP	-0.272505	0.104098	-2.61777	0.00885077	0.106127	0	4.15786	0.526919	-1.93274	0.0775177	0.638361	-2.57962	-0.455011	0.00965859	-0.325017	0.0387625	0.208829	-0.462287	-0.149705	0.00539932	0.0282792	0.250047	0.107016	0.0321154	0.108249	0.312501
201176	ARHGAP27	-0.271852	0.103865	-2.61737	0.00886109	0.106127	0	1.35524	0.929146	-1.6819	-0.426802	0.00761171	-1.80167	-0.694136	-1.21121	-0.282385	-0.214011	0.00248336	-0.320689	-0.228795	-0.689853	0.0281893	0.251431	0.106443	0.0316823	0.108643	0.324397
127544	RNF19B	-0.272031	0.103945	-2.61707	0.00886876	0.106127	0	2.0514	0.841988	-2.00462	0.00767784	-0.676509	-2.0259	0.322429	-0.464749	-0.337274	0.00383893	-0.221382	-0.361214	0.106011	-0.260507	0.0283074	0.25	0.107087	0.0317902	0.108102	0.314197
7571	ZNF23	-0.456529	0.174449	-2.61697	0.00887141	0.106127	51.8239	10.3786	0.065192	-3.63173	-1.00172	1.06605	-2.61593	-3.12431	-0.385732	-0.621143	-0.508903	0.350436	-0.468971	-1.09958	-0.216033	0.029252	0.258093	0.108058	0.0321397	0.123863	0.313667
27148	STK36	0.272135	0.103908	2.61898	0.00881921	0.106127	0	1.53471	0.90903	1.58958	-0.521731	1.21575	1.51607	1.30123	0.353704	0.266744	-0.261982	0.400558	0.269348	0.432383	0.198037	0.0281594	0.252145	0.108554	0.0315639	0.110414	0.31348
64965	MRPS9	0.272444	0.10399	2.6199	0.00879565	0.106127	0	2.67455	0.750009	1.19439	-0.497182	1.90504	1.70319	1.13933	0.19109	0.200043	-0.249557	0.636923	0.302954	0.377581	0.106872	0.0280513	0.251946	0.11178	0.0316391	0.10983	0.312786
6388	SDF2	-0.271942	0.103974	-2.61549	0.00890991	0.106446	0	2.65317	0.753271	-1.23696	-0.998795	0.343311	-1.88292	-1.64996	-0.762026	-0.207211	-0.507369	0.112094	-0.335349	-0.552096	-0.429112	0.0280615	0.258044	0.106608	0.0317198	0.111965	0.317103
92749	DRC1	-0.272106	0.104112	-2.61359	0.0089596	0.106808	0	4.43786	0.48824	-2.80263	-1.5216	-0.069249	-0.718061	-0.665048	0.368797	-0.474755	-0.789911	-0.0225936	-0.127127	-0.21915	0.206515	0.028695	0.269499	0.106449	0.0313437	0.108586	0.313566
284759	SIRPB2	-0.27194	0.104069	-2.61307	0.00897318	0.106808	0	4.06505	0.540089	-1.03261	-0.864102	0.68391	-2.48664	-1.29059	-0.873804	-0.172839	-0.437181	0.223819	-0.445204	-0.428765	-0.493201	0.0280161	0.255973	0.107102	0.0320548	0.110373	0.318581
28952	CCDC22	-0.271796	0.104026	-2.61277	0.00898116	0.106808	0	3.24634	0.662066	-0.729302	-0.115624	-0.865107	-2.11529	-2.07404	0.0562901	-0.121957	-0.0578239	-0.283646	-0.37743	-0.701599	0.0314684	0.027964	0.250104	0.107501	0.031837	0.114431	0.312525
84232	MAF1	0.358782	0.137332	2.61252	0.00898775	0.106808	29.0224	7.04448	0.217353	3.99449	1.14899	-0.123105	1.93369	-0.27059	0.740372	0.686651	0.586723	-0.0401677	0.344523	-0.0889491	0.416746	0.0295495	0.260758	0.106464	0.0317442	0.108059	0.316842
22898	DENND3	-0.271332	0.103936	-2.61057	0.00903912	0.107277	0	2.29572	0.806895	-1.28105	0.13371	-0.594108	-2.42626	-0.144278	-1.09148	-0.214638	0.0668739	-0.194282	-0.434135	-0.0474111	-0.619453	0.0280723	0.25014	0.106939	0.0320168	0.107984	0.322093
1326	MAP3K8	-0.271338	0.104059	-2.60755	0.00911927	0.108086	0	4.8106	0.439429	-1.24471	-0.726448	-0.686652	-2.32162	0.65455	-1.80084	-0.208516	-0.366257	-0.224722	-0.415001	0.215671	-1.05017	0.0280634	0.254192	0.107107	0.0319533	0.108567	0.340072
56061	UBFD1	0.4561	0.175034	2.60579	0.00916637	0.108501	52.4319	10.5113	0.0619792	4.41021	1.3424	0.198137	4.30797	-0.350082	0.00668812	0.763029	0.690939	0.06466	0.791138	-0.115117	0.00373878	0.029934	0.264919	0.106498	0.0337255	0.108129	0.3125
4680	CEACAM6	-0.342871	0.13161	-2.6052	0.00918208	0.108544	24.3995	6.61371	0.25099	-2.41117	-0.967163	1.13431	-3.136	-0.728796	-0.931443	-0.406962	-0.490808	0.373248	-0.565612	-0.240298	-0.526433	0.0284875	0.257528	0.108276	0.0325302	0.108714	0.319428
59285	CACNG6	0.270658	0.104027	2.60181	0.00927334	0.109479	0	4.69785	0.453856	0.827396	1.40307	0.263528	1.48883	1.59296	1.99762	0.138398	0.724165	0.0860166	0.264467	0.532354	1.17695	0.0279789	0.266388	0.10654	0.0315538	0.111683	0.34713
5636	PRPSAP2	0.340549	0.130966	2.60028	0.00931471	0.109823	23.9498	6.57461	0.254247	3.66329	0.489611	1.29072	1.95525	-0.685537	-0.316931	0.626804	0.245728	0.425797	0.348422	-0.225943	-0.177393	0.0292766	0.251887	0.108828	0.0317548	0.108626	0.313287
23307	FKBP15	-0.269908	0.103953	-2.59644	0.00941941	0.110912	0	2.23278	0.816087	-1.27787	-0.336065	0.0561221	-2.31561	-1.36067	0.108567	-0.214102	-0.16833	0.0183105	-0.413903	-0.452616	0.0606997	0.0280716	0.250885	0.106447	0.0319497	0.11065	0.312592
56923	NMUR2	0.269615	0.103862	2.59589	0.00943451	0.110945	0	0.933125	0.967777	1.85799	0.571471	0.718255	1.81299	-0.0359396	0.298242	0.312292	0.287205	0.235134	0.32273	-0.0118086	0.166908	0.028251	0.252578	0.10717	0.0316874	0.107956	0.313196
54210	TREM1	-0.269948	0.104018	-2.5952	0.00945358	0.111024	0	3.52022	0.620331	-2.15569	-0.466577	0.388858	-2.02405	0.253964	-1.0383	-0.363093	-0.234086	0.126993	-0.36088	0.0834789	-0.588411	0.0283702	0.251712	0.106655	0.0317893	0.108046	0.321156
64375	IKZF4	-0.269741	0.104007	-2.59348	0.00950096	0.111398	0	3.03283	0.694925	-2.03555	-1.78286	0.157587	-1.11865	-1.04421	-0.265165	-0.342553	-0.939302	0.0514222	-0.198333	-0.345579	-0.148362	0.0283198	0.277572	0.106477	0.0314342	0.109526	0.31305
23136	EPB41L3	-0.269451	0.103922	-2.59283	0.009519	0.111398	0	1.85751	0.868489	-1.09174	-0.821588	-1.09776	-2.2034	-0.651794	0.478014	-0.182775	-0.415197	-0.361025	-0.393448	-0.214757	0.267985	0.0280284	0.255387	0.108158	0.0318852	0.108561	0.314295
8654	PDE5A	-0.269415	0.103931	-2.59225	0.00953499	0.111398	0	2.30508	0.80552	-2.54319	-0.461671	-0.140211	-1.09084	-0.175964	-1.0504	-0.429744	-0.231608	-0.0457506	-0.193379	-0.0578274	-0.595459	0.0285536	0.251676	0.10647	0.0314266	0.107999	0.321364
8533	COPS3	0.269777	0.104065	2.59238	0.00953155	0.111398	0	3.94112	0.557925	1.90412	1.14374	1.40495	1.61489	-0.94911	0.495135	0.320143	0.583928	0.464445	0.28708	-0.313709	0.277641	0.0282683	0.260655	0.109281	0.0316025	0.109249	0.314427
10899	JTB	0.348968	0.13477	2.58937	0.00961527	0.112045	27.058	6.85476	0.231668	3.97666	-0.122999	0.463877	0.83089	1.68621	0.0159226	0.683408	-0.0615141	0.151557	0.147152	0.564692	0.008901	0.0295341	0.250118	0.106745	0.0313651	0.11215	0.312502
144717	FAM109A	0.269003	0.103883	2.58947	0.0096123	0.112045	0	1.91953	0.860164	0.880891	0.598576	1.5748	1.63136	0.719614	1.35331	0.147369	0.300978	0.522382	0.290039	0.237249	0.774461	0.0279878	0.252831	0.110033	0.0316092	0.108695	0.327495
5770	PTPN1	-0.269065	0.103957	-2.58824	0.00964691	0.112181	0	2.76509	0.736147	-1.24979	0.0328113	-0.099914	-2.54029	-0.323753	-1.15462	-0.209371	0.0164059	-0.0325996	-0.455055	-0.106447	-0.656484	0.0280646	0.250008	0.106457	0.0320894	0.108104	0.323274
54463	RETREG1	0.268791	0.103858	2.58806	0.00965188	0.112181	0	1.49374	0.913792	1.89083	0.49283	1.16273	1.15585	0.123784	1.29244	0.317881	0.247356	0.382767	0.204962	0.0406751	0.738071	0.0282632	0.251912	0.10837	0.0314446	0.107976	0.326119
112950	MED8	-0.268901	0.104012	-2.58529	0.00972958	0.112938	0	3.20907	0.667789	-2.22936	-1.07734	0.748687	-1.58328	-0.635676	-0.539207	-0.375715	-0.548713	0.245169	-0.281405	-0.209418	-0.302527	0.0284025	0.259409	0.107233	0.0315899	0.108532	0.314788
7357	UGCG	-0.268371	0.103891	-2.58319	0.00978906	0.113482	0	2.07006	0.839368	-2.24804	-0.459811	-0.896019	-0.623112	-0.650368	-1.36519	-0.37892	-0.230669	-0.293887	-0.110289	-0.214285	-0.781588	0.0284109	0.251663	0.107579	0.0313281	0.108559	0.327772
9754	STARD8	-0.268661	0.104051	-2.58203	0.00982218	0.11372	0	3.70469	0.592666	-2.51489	0.686219	-1.41758	-1.22635	0.104003	-0.227429	-0.424853	0.345662	-0.468732	-0.217536	0.0341742	-0.127219	0.0285391	0.253734	0.109333	0.0314654	0.10797	0.312905
102	ADAM10	-0.268389	0.103966	-2.5815	0.00983711	0.113746	0	2.98836	0.701781	-0.853344	-0.0713732	-0.0543688	-2.50189	-1.11	-1.19361	-0.142749	-0.0356895	-0.0177384	-0.448003	-0.367701	-0.679461	0.0279831	0.25004	0.106447	0.0320646	0.109734	0.324042
7499	XG	-0.345181	0.133767	-2.58047	0.00986653	0.113794	26.0661	6.7628	0.238887	-2.58522	-0.642334	1.30724	-2.58447	-1.61197	-1.06925	-0.437014	-0.323258	0.431372	-0.463179	-0.538929	-0.606462	0.0285755	0.253265	0.108891	0.0321186	0.111776	0.321695
583	BBS2	0.268131	0.103893	2.58084	0.00985596	0.113794	0	2.18989	0.822295	2.12297	-0.0908777	0.877428	1.19144	0.160196	1.45613	0.357493	-0.0454447	0.287727	0.211308	0.0526436	0.836472	0.0283561	0.250065	0.107532	0.031455	0.107991	0.329992
57708	MIER1	-0.267996	0.10389	-2.57961	0.00989123	0.113933	0	1.42805	0.92122	-2.17345	-0.038117	-1.27771	-1.28447	-0.0914947	-0.257518	-0.366134	-0.0190589	-0.421409	-0.227912	-0.0300636	-0.144076	0.0283779	0.250011	0.108779	0.0314835	0.107966	0.313019
3156	HMGCR	-0.296112	0.11483	-2.5787	0.00991717	0.113973	9.90022	5.5494	0.352559	-0.899784	-1.17969	0.514172	-2.13397	-2.08723	-1.36832	-0.150539	-0.603104	0.168044	-0.380824	-0.706332	-0.783469	0.0279911	0.261367	0.106814	0.0318471	0.114519	0.327846
9816	URB2	0.268402	0.104088	2.5786	0.00992003	0.113973	0	4.34146	0.501371	1.84389	-0.878536	-0.453564	2.16703	1.28587	0.513527	0.309894	-0.444663	-0.148178	0.386831	0.427165	0.288022	0.0282458	0.256179	0.106731	0.0318651	0.110355	0.314574
10421	CD2BP2	-0.267798	0.103894	-2.57762	0.00994837	0.114152	0	1.6161	0.899296	-2.06534	0.14991	0.0847457	-1.73632	-0.708554	-0.669395	-0.34764	0.0749812	0.02765	-0.308914	-0.233578	-0.376317	0.028332	0.250176	0.106453	0.0316533	0.108672	0.31604
90488	TMEM263	0.267979	0.104008	2.57654	0.00997957	0.114365	0	4.19702	0.521413	1.73823	-0.0821035	-0.584194	1.76783	1.14056	1.74356	0.291941	-0.0410561	-0.191026	0.31459	0.377996	1.01397	0.0282083	0.250053	0.106923	0.0316671	0.109835	0.338204
146722	CD300LF	-0.267971	0.104092	-2.57437	0.0100423	0.114617	0	4.462	0.484983	-1.24624	0.684058	0.301347	-2.71316	-1.08447	-0.66351	-0.208773	0.344557	0.0983748	-0.486909	-0.359106	-0.372971	0.0280637	0.25371	0.10657	0.0322066	0.109651	0.315978
79818	ZNF552	-0.267572	0.103937	-2.57437	0.0100424	0.114617	0	2.13303	0.830449	-1.2828	-0.982023	0.15197	-1.90799	-1.57188	-0.127025	-0.214932	-0.498582	0.0495886	-0.339877	-0.52507	-0.0710233	0.0280728	0.257768	0.106475	0.0317318	0.111582	0.312626
1116	CHI3L1	-0.267671	0.103994	-2.57392	0.0100554	0.114617	0	2.91193	0.713562	-1.0045	0.231548	-0.667727	-2.7965	-0.371148	-0.265216	-0.168116	0.115871	-0.218491	-0.502329	-0.122057	-0.148391	0.0280105	0.25042	0.107071	0.0322662	0.108151	0.31305
221955	DAGLB	-0.267492	0.103938	-2.57358	0.0100653	0.114617	0	3.08101	0.687499	-1.39961	0.725893	-0.837686	-1.75388	-0.857929	-1.64457	-0.234632	0.365972	-0.27457	-0.312078	-0.28326	-0.952095	0.0281035	0.254185	0.107435	0.031661	0.10901	0.335162
9550	ATP6V1G1	0.417736	0.162315	2.57361	0.0100643	0.114617	45.7923	9.22378	0.100464	4.48143	-0.166485	0.951107	1.7452	-0.0235429	2.10835	0.776267	-0.0832786	0.312167	0.310514	-0.00773538	1.25011	0.0300047	0.250217	0.107725	0.0316572	0.107955	0.351569
5130	PCYT1A	-0.267303	0.103946	-2.57154	0.0101246	0.114923	0	2.69027	0.747606	-1.49701	-0.608329	-1.00158	-2.02326	0.581857	-1.12104	-0.251084	-0.305939	-0.328949	-0.360735	0.191605	-0.636764	0.0281313	0.252925	0.107866	0.0317889	0.108438	0.322637
10636	RGS14	-0.267757	0.104131	-2.57135	0.0101304	0.114923	0	4.99734	0.416205	-1.01418	0.545988	-0.339713	-2.28028	-2.20542	0.321833	-0.169742	0.274274	-0.110917	-0.407456	-0.748984	0.180144	0.0280124	0.252351	0.106604	0.0319291	0.115336	0.313311
64744	SMAP2	-0.34254	0.13322	-2.57123	0.0101337	0.114923	25.5875	6.7193	0.242367	-2.68723	1.19014	-1.73783	-2.409	0.236325	-1.31318	-0.454692	0.608696	-0.578589	-0.430976	0.0776765	-0.750446	0.0286303	0.261578	0.110847	0.0320061	0.108034	0.326579
5608	MAP2K6	-0.267221	0.103946	-2.57076	0.0101476	0.114923	0	2.75149	0.738233	-1.16999	-1.17076	-1.36082	-0.749615	-1.72615	-1.10788	-0.195937	-0.598334	-0.449483	-0.132725	-0.578606	-0.62905	0.0280457	0.261188	0.109101	0.0313494	0.11236	0.322393
9341	VAMP3	-0.273084	0.106257	-2.57003	0.0101689	0.114923	2.00995	5.10256	0.403493	-1.84121	-0.350122	0.675474	-2.82915	-0.23728	0.331761	-0.309437	-0.175397	0.221042	-0.508383	-0.0779907	0.185716	0.0282449	0.250961	0.107085	0.0322901	0.108035	0.313362
8943	AP3D1	0.361698	0.140718	2.57038	0.0101587	0.114923	31.6123	7.31125	0.198502	4.22788	1.17352	0.0956898	1.86613	0.0849647	-0.192625	0.729348	0.599808	0.0312212	0.332317	0.0279177	-0.107731	0.0297594	0.261243	0.106455	0.0317119	0.107965	0.31279
8439	NSMAF	-0.342819	0.133454	-2.56881	0.0102049	0.115186	25.8497	6.74306	0.240461	-2.61651	-1.16382	-1.04425	-3.0173	1.16223	-0.163828	-0.442431	-0.59463	-0.343162	-0.543398	0.385306	-0.0916133	0.0285921	0.26105	0.107992	0.032434	0.109908	0.31271
84034	EMILIN2	-0.267371	0.104121	-2.56788	0.0102323	0.115349	0	4.86019	0.43318	-2.0301	0.668962	-1.63921	-0.605419	-1.95354	0.124611	-0.341621	0.336845	-0.544514	-0.107153	-0.658612	0.0696733	0.0283176	0.253546	0.110344	0.0313254	0.113662	0.312621
8500	PPFIA1	-0.266759	0.1039	-2.56745	0.0102449	0.115349	0	1.73927	0.883916	-0.688741	-1.13103	-1.28593	-2.02595	-0.667441	-0.611472	-0.115163	-0.577169	-0.424181	-0.361224	-0.219943	-0.343432	0.0279584	0.26041	0.10881	0.0317902	0.108591	0.315449
116173	CMTM5	-0.266698	0.103952	-2.56559	0.0103001	0.115521	0	2.63516	0.756016	-2.33439	-0.500741	-0.521657	-1.47309	0.533605	-0.889054	-0.39375	-0.251357	-0.170499	-0.261647	0.175653	-0.501981	0.0284507	0.251974	0.106825	0.031548	0.108361	0.3188
91404	SESTD1	-0.333341	0.129936	-2.56542	0.010305	0.115521	22.8438	6.48036	0.262241	-1.68059	-2.34609	0.269896	-2.47438	-0.21076	-1.40284	-0.282164	-1.28914	0.0880973	-0.442955	-0.0692683	-0.804246	0.0281888	0.301934	0.106545	0.032047	0.108018	0.32867
90550	MCU	-0.26644	0.103883	-2.5648	0.0103235	0.115521	0	1.48305	0.915017	-1.62717	-0.522854	0.270992	-2.03517	-0.78631	-0.553694	-0.273109	-0.262551	0.0884553	-0.362894	-0.259411	-0.310718	0.0281714	0.252154	0.106546	0.031795	0.10884	0.314914
832	CAPZB	-0.266702	0.104022	-2.56391	0.0103501	0.115521	0	3.46466	0.628742	-1.82537	-1.47045	0.559235	-1.28751	-1.54464	-0.433293	-0.306744	-0.761401	0.18283	-0.228453	-0.515673	-0.242788	0.0282391	0.268117	0.106882	0.0314844	0.111453	0.313974
4240	MFGE8	0.26635	0.10388	2.56402	0.0103468	0.115521	0	1.43843	0.920064	2.13702	0.387108	0.91005	1.34984	0.594523	-0.540566	0.359896	0.194009	0.29854	0.239591	0.195795	-0.303295	0.0283621	0.251176	0.107615	0.0315048	0.108459	0.3148
254887	ZDHHC23	0.266931	0.104088	2.56447	0.0103334	0.115521	0	4.31614	0.504854	2.24576	-1.04114	1.63659	1.42806	0.190508	-0.105452	0.378529	-0.529619	0.54361	0.253584	0.0626092	-0.0589576	0.0284099	0.258766	0.110331	0.0315317	0.108006	0.312587
64077	LHPP	0.345556	0.13472	2.565	0.0103177	0.115521	26.7787	6.82862	0.233702	3.30642	1.99221	1.48601	0.787567	-0.26628	0.300639	0.563197	1.06429	0.49202	0.139461	-0.0875309	0.168253	0.0290137	0.285397	0.109628	0.0313565	0.108055	0.313208
22920	KIFAP3	0.266105	0.103842	2.56261	0.010389	0.115811	0	0.842825	0.974222	1.72002	0.381928	0.919831	1.07791	1.50831	0.149843	0.288851	0.191401	0.301784	0.191077	0.503165	0.0837886	0.0282021	0.251145	0.107641	0.0314232	0.111286	0.312676
8405	SPOP	-0.314772	0.122865	-2.56194	0.010409	0.11589	16.9857	6.02306	0.303982	-2.32934	-0.386182	0.831898	-1.5554	-2.49168	-0.688518	-0.392881	-0.193543	0.272655	-0.276403	-0.854315	-0.387195	0.0284483	0.251171	0.107421	0.031579	0.117558	0.316248
8460	TPST1	-0.266555	0.104088	-2.56087	0.010441	0.116103	0	4.38541	0.49536	-1.62105	0.228833	-2.23328	-1.71018	0.478314	-0.349697	-0.272072	0.11451	-0.753771	-0.304211	0.157394	-0.195786	0.0281694	0.25041	0.113919	0.031642	0.108281	0.313458
57610	RANBP10	-0.265895	0.104069	-2.55498	0.0106194	0.117941	0	4.23726	0.515786	-1.41647	-0.537958	-1.08526	-0.690612	-2.60646	-0.144984	-0.237478	-0.270204	-0.356847	-0.122258	-0.897441	-0.0810696	0.0281082	0.252282	0.108118	0.0313389	0.118552	0.312664
51411	BIN2	-0.265688	0.10401	-2.55445	0.0106355	0.117974	0	3.55799	0.614632	-2.17729	0.945833	0.0697026	-1.674	-0.87213	-0.93822	-0.366792	0.479669	0.0227416	-0.297703	-0.287996	-0.530349	0.0283795	0.25719	0.106449	0.0316267	0.109046	0.319532
28984	RGCC	-0.265797	0.104078	-2.55381	0.0106551	0.118046	0	4.30848	0.50591	-1.78645	-1.32352	-2.04006	-0.388313	-1.21033	0.331324	-0.30013	-0.680651	-0.684589	-0.0686984	-0.401561	0.185471	0.0282252	0.264478	0.112609	0.031299	0.110076	0.31336
5791	PTPRE	-0.337868	0.132329	-2.55325	0.0106724	0.118092	24.8641	6.65461	0.247621	-1.53864	1.22246	-0.331761	-2.89703	-1.94169	-1.28715	-0.258123	0.626022	-0.108317	-0.520989	-0.65441	-0.734917	0.0281437	0.262247	0.106597	0.0323408	0.113589	0.326003
3094	HINT1	0.265302	0.103946	2.55229	0.0107017	0.118271	0	3.44012	0.632467	1.62714	0.0343901	1.31438	0.583358	1.52682	1.70484	0.273104	0.0171954	0.433782	0.103243	0.509533	0.989669	0.0281714	0.250009	0.108918	0.0313222	0.111371	0.336986
283989	TSEN54	0.265433	0.104105	2.54966	0.0107827	0.11902	0	4.69772	0.453873	2.47028	-0.585125	1.24229	0.395709	1.74461	-0.101308	0.417154	-0.29414	0.409484	0.0700078	0.585052	-0.05664	0.0285166	0.252704	0.108649	0.0312997	0.112458	0.31258
125206	SLC5A10	-0.265209	0.104076	-2.54822	0.0108274	0.119367	0	4.77691	0.443708	-1.24085	-2.09858	-0.264209	-1.89119	0.164379	-1.28575	-0.207865	-1.12992	-0.0862394	-0.336844	0.0540188	-0.734083	0.0280624	0.289897	0.10654	0.0317238	0.107993	0.325972
6016	RIT1	-0.342201	0.134322	-2.54762	0.0108461	0.119427	26.4671	6.79967	0.23597	-1.16029	-0.22671	0.472234	-2.73327	-2.55125	-1.23492	-0.194305	-0.113446	0.154295	-0.490626	-0.876627	-0.703889	0.0280435	0.250402	0.106756	0.0322208	0.118066	0.324886
245812	CNPY4	0.264618	0.10391	2.54661	0.0108774	0.119625	0	2.27008	0.810651	1.3846	1.67291	0.389564	1.11339	1.22413	1.07222	0.232099	0.875623	0.127225	0.197396	0.406231	0.608195	0.0280994	0.27396	0.106656	0.0314328	0.110126	0.321748
8636	SSNA1	0.365529	0.143584	2.54575	0.0109045	0.119776	33.7548	7.54772	0.182986	4.17436	1.08195	-0.0548211	0.715431	1.26323	0.586089	0.719516	0.551148	-0.017886	0.12666	0.419478	0.32905	0.02971	0.259493	0.106447	0.0313432	0.11027	0.315207
79145	CHCHD7	-0.264732	0.104009	-2.54528	0.0109191	0.119791	0	3.99031	0.550813	-2.3677	-1.36347	0.131234	-0.577259	-0.816611	-1.40939	-0.399479	-0.702442	0.0428205	-0.102162	-0.269494	-0.808197	0.0284665	0.26542	0.106467	0.0313213	0.10891	0.32883
8740	TNFSF14	-0.264377	0.103942	-2.5435	0.0109748	0.120255	0	2.37703	0.79489	-2.63469	0.145919	-0.022066	-1.19207	-0.579279	-0.355638	-0.44558	0.072984	-0.00719916	-0.21142	-0.190752	-0.199123	0.0286018	0.250166	0.106443	0.0314552	0.108433	0.313491
7086	TKT	-0.26436	0.103975	-2.54254	0.0110051	0.120423	0	2.78593	0.732947	-1.53304	-1.17987	0.42669	-2.21394	-0.650704	0.0330094	-0.257176	-0.603204	0.139377	-0.395368	-0.214396	0.0184531	0.028142	0.26137	0.106698	0.0318912	0.108559	0.312509
8553	BHLHE40	-0.264376	0.103996	-2.54216	0.0110169	0.120423	0	3.09179	0.685837	-0.562172	-0.762687	-0.807987	-2.79211	-0.437535	-0.128473	-0.0939737	-0.384857	-0.26475	-0.501516	-0.14394	-0.0718333	0.0279431	0.254629	0.107365	0.032263	0.108227	0.312629
1318	SLC31A2	-0.263696	0.103872	-2.53867	0.0111274	0.121483	0	1.3481	0.929905	-1.75058	-0.889095	-0.719941	-1.82665	0.1914	-0.215282	-0.294038	-0.450142	-0.23569	-0.325193	0.0629023	-0.120416	0.0282126	0.256332	0.107173	0.0316936	0.108007	0.312863
5138	PDE2A	-0.401184	0.158173	-2.53637	0.0112009	0.122138	42.9267	8.76067	0.119	-2.80954	-0.848914	0.948063	-2.12901	-3.09734	-0.579536	-0.475957	-0.429319	0.311156	-0.379922	-1.08871	-0.325339	0.028699	0.25576	0.107716	0.0318444	0.12355	0.315146
219844	HYLS1	0.315081	0.124267	2.5355	0.0112286	0.122291	18.3341	6.12251	0.29448	1.23873	1.26791	-0.335732	2.90465	0.287039	1.88388	0.207508	0.650504	-0.109616	0.522406	0.094362	1.1032	0.0280619	0.263224	0.106601	0.0323466	0.108072	0.342926
353514	LILRA5	-0.263268	0.103863	-2.53476	0.0112524	0.122378	0	2.16407	0.826009	-1.20128	0.240088	-0.724356	-1.67163	-1.10546	-1.59602	-0.201203	0.120152	-0.237145	-0.297276	-0.366171	-0.922045	0.028053	0.250451	0.107183	0.0316258	0.109719	0.333754
196264	MPZL3	-0.271631	0.107177	-2.53441	0.0112638	0.122378	2.92796	5.15081	0.397753	-2.21954	0.10943	0.969403	-1.88427	-0.72805	-1.46758	-0.374031	0.0547251	0.318247	-0.335593	-0.24005	-0.843423	0.0283981	0.250094	0.107775	0.0317205	0.108713	0.330284
5743	PTGS2	-0.263095	0.103882	-2.53263	0.0113209	0.122609	0	2.47913	0.779635	-1.65428	-1.34471	-0.476743	-0.986844	-0.675965	-1.64025	-0.277703	-0.692194	-0.155773	-0.174869	-0.222769	-0.949413	0.0281802	0.264973	0.106762	0.0314	0.108608	0.335035
253943	YTHDF3	-0.263123	0.103899	-2.53248	0.0113259	0.122609	0	1.98696	0.850947	-1.54022	-0.670592	0.441192	-2.03267	-0.799282	-0.783045	-0.258392	-0.337677	0.144126	-0.362441	-0.263726	-0.44113	0.0281442	0.253563	0.106716	0.0317937	0.10887	0.317365
6929	TCF3	0.381253	0.150499	2.53325	0.011301	0.122609	38.4816	8.12765	0.149339	3.82631	0.869152	-0.18783	3.3846	-0.452536	0.458859	0.656158	0.439798	-0.0612948	0.61247	-0.148888	0.257188	0.0294073	0.256044	0.106492	0.0327459	0.108246	0.314154
3985	LIMK2	-0.30132	0.119052	-2.53099	0.0113741	0.122983	13.8198	5.80179	0.325986	-2.63499	-0.030571	0.980936	-2.39816	-0.448304	-1.20119	-0.445633	-0.0152857	0.322081	-0.428992	-0.147492	-0.683932	0.0286019	0.250007	0.107808	0.0319994	0.108241	0.324194
3315	HSPB1	0.26278	0.103852	2.53033	0.0113956	0.123067	0	1.18772	0.94605	1.70832	0.915365	0.11357	1.87274	0.191291	0.526695	0.286866	0.463795	0.037056	0.33351	0.0628665	0.295458	0.0281981	0.256722	0.106461	0.031715	0.108007	0.314682
9925	ZBTB5	0.263061	0.104026	2.5288	0.0114454	0.123457	0	3.64841	0.60106	2.91882	0.42274	0.562733	0.207913	0.958767	0.256688	0.495023	0.211963	0.183978	0.0367752	0.316939	0.143611	0.0287632	0.251404	0.106888	0.0312858	0.109276	0.313016
729230	CCR2	-0.262961	0.104031	-2.5277	0.0114812	0.123694	0	3.7673	0.583381	-1.51245	-0.414015	0.572841	-1.75709	-2.06552	-0.125675	-0.253694	-0.207564	0.187297	-0.312655	-0.698547	-0.0702683	0.0281359	0.251346	0.106904	0.0316624	0.114375	0.312623
9683	N4BP1	-0.262853	0.104019	-2.52697	0.0115052	0.123805	0	3.75265	0.585548	-0.60952	0.467905	-0.638082	-2.32152	-1.7926	-0.733315	-0.101898	0.234757	-0.208737	-0.414983	-0.601844	-0.412719	0.0279484	0.251722	0.107016	0.0319532	0.112721	0.316758
55015	PRPF39	0.262582	0.103941	2.52625	0.0115286	0.123908	0	2.49924	0.77661	1.89558	0.869661	0.0884318	2.00953	-0.407604	0.565233	0.318689	0.440062	0.0288528	0.358249	-0.134071	0.317245	0.028265	0.256052	0.106454	0.0317819	0.108191	0.315016
147686	ZNF418	0.262582	0.103971	2.52553	0.0115524	0.124016	0	3.19836	0.669435	2.00863	0.877478	1.68629	0.884282	-0.395414	0.995105	0.337958	0.444114	0.56075	0.156636	-0.130053	0.563297	0.028309	0.256164	0.11058	0.0313764	0.108177	0.320433
10924	SMPDL3A	-0.262536	0.103983	-2.5248	0.0115764	0.124126	0	3.85033	0.57116	-1.24809	-0.096471	0.167887	-1.52095	-2.04187	-1.46534	-0.209085	-0.0482425	0.0547841	-0.270223	-0.69008	-0.842065	0.0280642	0.250073	0.106482	0.0315658	0.11422	0.330227
1378	CR1	-0.333348	0.13211	-2.52326	0.0116271	0.124521	24.764	6.64575	0.248347	-2.10706	-0.101571	-1.3526	-0.20291	-2.09789	-2.05561	-0.354772	-0.0507935	-0.446702	-0.0358901	-0.71016	-1.21509	0.0283494	0.250081	0.109068	0.0312856	0.11459	0.349411
7286	TUFT1	-0.315234	0.125012	-2.52164	0.011681	0.124949	19.0801	6.17895	0.289194	-3.73861	-0.983516	0.283693	-1.00866	-0.721603	-0.0369231	-0.640342	-0.499363	0.0926055	-0.178749	-0.237909	-0.020641	0.0293361	0.257793	0.106555	0.0314054	0.108699	0.312511
84733	CBX2	0.261741	0.103859	2.52017	0.01173	0.125324	0	1.41186	0.923011	1.42267	0.0116466	0.249001	2.24195	0.390796	0.705629	0.238524	0.00582332	0.0812709	0.40047	0.128531	0.396937	0.0281099	0.250001	0.106529	0.031907	0.108172	0.316439
3419	IDH3A	0.262159	0.104045	2.51966	0.0117468	0.125355	0	3.91547	0.561649	0.64876	1.61306	0.945692	2.49018	0.293383	-0.244801	0.108468	0.841466	0.310369	0.445853	0.0964497	-0.136951	0.0279532	0.272127	0.10771	0.0320571	0.108077	0.312969
597	BCL2A1	-0.261874	0.103957	-2.51907	0.0117665	0.125416	0	3.00104	0.699825	-2.53522	0.251353	-0.298234	-1.33113	0.14101	-0.987671	-0.428366	0.125801	-0.0973574	-0.236247	0.046337	-0.558983	0.0285495	0.250495	0.106567	0.0314986	0.107983	0.320312
11343	MGLL	-0.278704	0.110674	-2.51824	0.0117943	0.125564	6.15171	5.32775	0.377204	-0.735264	-0.460091	0.548511	-2.73218	-1.84979	-0.729378	-0.122956	-0.23081	0.17931	-0.490425	-0.621938	-0.410473	0.0279649	0.251665	0.106866	0.0322201	0.113044	0.316712
26234	FBXL5	-0.261304	0.103799	-2.5174	0.0118223	0.125652	0	0.844953	0.974078	-1.61045	-0.431301	-0.169293	-1.60834	-0.753719	-1.10418	-0.270277	-0.21628	-0.0552433	-0.285904	-0.248576	-0.62688	0.028166	0.251462	0.106483	0.0315998	0.108768	0.322324
6185	RPN2	-0.261365	0.103833	-2.51716	0.0118305	0.125652	0	0.930328	0.967987	-1.20103	0.020399	-0.96524	-1.80487	-1.27362	-0.110461	-0.201161	0.0101996	-0.316863	-0.321265	-0.423004	-0.061759	0.0280529	0.250003	0.107764	0.0316837	0.110309	0.312595
4297	KMT2A	0.261981	0.104099	2.51666	0.0118473	0.125682	0	4.75284	0.446782	0.575658	1.11344	-0.402276	2.82113	1.10524	0.416101	0.0962305	0.567826	-0.131385	0.506895	0.366096	0.233112	0.0279445	0.260076	0.10667	0.0322842	0.109718	0.313859
79641	ROGDI	-0.261562	0.10397	-2.51575	0.0118779	0.12571	0	2.91976	0.712355	-2.32875	0.288765	-0.878275	-0.636123	-1.60108	0.0533202	-0.39278	0.144571	-0.288007	-0.112596	-0.535159	0.029808	0.0284481	0.250653	0.107534	0.0313301	0.111723	0.312522
54465	ETAA1	0.374322	0.148778	2.51598	0.0118702	0.12571	37.0368	7.94115	0.159509	1.61767	-0.222038	2.77007	3.30432	-0.375004	0.595868	0.2715	-0.111105	0.953148	0.597289	-0.123327	0.334588	0.0281683	0.250386	0.118396	0.0326741	0.108155	0.315299
2542	SLC37A4	0.261573	0.104009	2.51489	0.0119068	0.125868	0	3.47228	0.627586	2.77943	-0.332646	0.191871	0.702203	1.18389	0.172055	0.470715	-0.166611	0.062614	0.124314	0.392622	0.0962176	0.0286817	0.250867	0.106494	0.0313409	0.109983	0.312731
59	ACTA2	-0.261416	0.103994	-2.51376	0.0119452	0.125977	0	3.39635	0.639127	-0.76847	0.799984	-1.22768	-2.26491	-1.18001	-0.674823	-0.12852	0.404053	-0.404569	-0.404654	-0.39131	-0.379403	0.0279697	0.255102	0.108596	0.0319202	0.109969	0.316099
8720	MBTPS1	0.261262	0.103917	2.51414	0.0119323	0.125977	0	2.10098	0.835003	1.74799	1.31608	0.346593	1.8659	-0.156175	0.0909036	0.293598	0.676605	0.113167	0.332276	-0.0513217	0.0508219	0.0282117	0.264306	0.106611	0.0317118	0.107989	0.312565
3281	HSBP1	-0.260838	0.103883	-2.51088	0.0120431	0.126862	0	1.95987	0.85467	-1.88365	-0.991671	-0.64097	-1.5121	0.372547	-0.946975	-0.316658	-0.503635	-0.209687	-0.268636	0.122518	-0.535411	0.0282606	0.257926	0.107021	0.0315624	0.108152	0.319667
6093	ROCK1	-0.260512	0.103849	-2.50856	0.0121226	0.127543	0	1.19657	0.945206	-2.13462	0.22229	-0.556374	-1.54175	-0.343124	-0.28127	-0.359486	0.111231	-0.181891	-0.273954	-0.112826	-0.15739	0.0283611	0.250387	0.106878	0.0315737	0.108122	0.313119
80896	NPL	-0.260915	0.104026	-2.50816	0.0121361	0.127543	0	4.51166	0.478324	-1.27058	0.269945	-1.70206	-0.656225	-1.95182	-1.40642	-0.212873	0.135127	-0.566204	-0.11616	-0.658004	-0.806405	0.0280697	0.250571	0.110661	0.0313333	0.113652	0.328757
8639	AOC3	-0.260931	0.104051	-2.50772	0.0121514	0.127554	0	4.15148	0.527819	-1.23853	0.0289419	0.357974	-2.45391	-1.61558	0.381328	-0.207474	0.0144712	0.11689	-0.439203	-0.540177	0.213558	0.0280618	0.250007	0.106622	0.0320341	0.111794	0.31364
777	CACNA1E	-0.260091	0.103901	-2.50325	0.0123058	0.129025	0	2.39153	0.792734	-1.95083	-0.570361	0.54314	-1.47601	-0.913853	-1.10365	-0.328099	-0.286641	0.177547	-0.26217	-0.301923	-0.626571	0.0282862	0.252568	0.106857	0.031549	0.109154	0.322315
10962	MLLT11	0.260475	0.104101	2.50213	0.0123447	0.129282	0	4.95104	0.421885	1.33288	0.968667	-1.01527	1.92778	1.87304	0.491368	0.223374	0.491595	-0.333506	0.343455	0.630131	0.275516	0.0280856	0.257552	0.107906	0.0317413	0.113179	0.314398
65003	MRPL11	0.260204	0.104033	2.50117	0.0123785	0.129335	0	4.75692	0.44626	1.28668	-0.734539	-0.160745	1.89623	1.65846	1.56385	0.215586	-0.370406	-0.0524528	0.337754	0.555047	0.902235	0.0280738	0.254288	0.106479	0.0317262	0.112008	0.332851
57659	ZBTB4	0.260214	0.104027	2.5014	0.0123702	0.129335	0	3.99715	0.549826	1.16657	2.34607	0.753146	1.38855	0.37969	0.86591	0.195361	1.28913	0.24664	0.246513	0.124871	0.48866	0.0280449	0.301933	0.107243	0.0315179	0.10816	0.31847
4709	NDUFB3	-0.259738	0.103909	-2.49967	0.012431	0.129355	0	2.22683	0.816951	-2.23502	0.538551	-0.3247	-1.61143	-0.203642	-0.667988	-0.376686	0.270504	-0.106009	-0.286458	-0.0669279	-0.375517	0.0284051	0.252287	0.10659	0.0316011	0.108013	0.316025
29766	TMOD3	-0.259442	0.103791	-2.49965	0.0124315	0.129355	0	0.576553	0.989052	-1.68994	-0.716545	-0.213547	-1.60651	-0.518795	-0.74824	-0.283748	-0.361182	-0.0696918	-0.285576	-0.17076	-0.421237	0.0281919	0.254077	0.106506	0.0315991	0.108338	0.316936
7408	VASP	-0.295323	0.118157	-2.4994	0.0124403	0.129355	12.9449	5.74349	0.331984	-2.38	-0.120366	0.75244	-1.21075	-2.16826	-1.2251	-0.401595	-0.0601964	0.246407	-0.214752	-0.735526	-0.698076	0.0284724	0.250113	0.107241	0.0314607	0.115073	0.324683
151636	DTX3L	-0.259968	0.104023	-2.49914	0.0124497	0.129355	0	3.8543	0.570578	-2.1752	0.482978	-1.74268	-0.811794	-1.0688	0.54492	-0.366434	0.242374	-0.580271	-0.143762	-0.353837	0.305756	0.0283786	0.251836	0.110873	0.0313613	0.109602	0.314837
22797	TFEC	-0.260146	0.104098	-2.49906	0.0124524	0.129355	0	4.96454	0.420223	-1.05008	-1.82743	-0.716142	-2.37147	-0.0755721	0.790697	-0.175774	-0.965482	-0.234438	-0.42411	-0.0248312	0.445508	0.0280197	0.27913	0.107166	0.0319832	0.107963	0.317462
338692	ANKRD13D	-0.25939	0.10385	-2.49773	0.0124991	0.12963	0	1.28728	0.936236	-1.98673	0.186952	-1.31292	-1.27651	-0.274995	-0.339132	-0.334222	0.0935271	-0.433289	-0.22649	-0.0903984	-0.189854	0.0283002	0.250273	0.108913	0.0314809	0.108062	0.313401
131870	NUDT16	-0.259785	0.104018	-2.49749	0.0125077	0.12963	0	3.66123	0.599143	-1.49333	-1.03868	0.680299	-2.43448	-0.325394	-0.307258	-0.250463	-0.528323	0.22263	-0.435642	-0.106987	-0.171965	0.0281302	0.258723	0.107095	0.0320219	0.108105	0.313239
25780	RASGRP3	-0.259492	0.10396	-2.49606	0.012558	0.129758	0	2.87007	0.720008	-1.03586	-1.22222	-2.02293	-1.10757	-1.09845	0.0897542	-0.173384	-0.625894	-0.67851	-0.19636	-0.36381	0.0501792	0.0280168	0.262242	0.1125	0.0314312	0.109696	0.312563
51105	PHF20L1	-0.259311	0.10392	-2.4953	0.012585	0.129758	0	3.07007	0.689183	-0.765502	-0.61429	-1.91676	-1.45224	-0.561823	-1.49487	-0.128023	-0.308972	-0.641039	-0.257913	-0.18498	-0.860027	0.0279693	0.252983	0.11185	0.0315404	0.108405	0.330991
1308	COL17A1	-0.259667	0.104088	-2.49469	0.0126066	0.129758	0	4.73267	0.449369	-1.18408	-1.09586	0.881965	-2.63642	-0.594483	-0.520787	-0.198307	-0.55851	0.28923	-0.472748	-0.195782	-0.292121	0.0280489	0.259748	0.107543	0.0321536	0.108459	0.314633
25824	PRDX5	0.259735	0.104111	2.4948	0.0126029	0.129758	0	4.98105	0.418197	2.30954	1.73473	1.28862	0.889061	-0.640907	-0.00814399	0.389478	0.911271	0.425089	0.157485	-0.211151	-0.00455263	0.0284391	0.27595	0.10882	0.0313774	0.108541	0.312501
6853	SYN1	0.259351	0.103952	2.49491	0.0125987	0.129758	0	2.79557	0.731467	1.22879	1.22593	1.63965	0.698992	1.66683	0.228007	0.205834	0.627886	0.544664	0.123744	0.557955	0.127543	0.0280595	0.26232	0.110346	0.0313404	0.112051	0.312907
7694	ZNF135	0.259442	0.103977	2.49519	0.0125888	0.129758	0	3.41899	0.63568	1.74229	-0.907658	1.24969	0.930954	1.58563	0.918111	0.292631	-0.459786	0.411973	0.164931	0.529819	0.518735	0.0282097	0.256606	0.108676	0.0313868	0.111648	0.319227
144423	GLT1D1	-0.286817	0.114993	-2.49421	0.0126237	0.129786	10.1744	5.56634	0.350726	-2.88188	0.447499	0.826445	-1.83351	-0.751377	-0.924883	-0.488572	0.224453	0.270852	-0.326431	-0.247798	-0.522644	0.0287412	0.251574	0.107408	0.0316968	0.108762	0.319329
55755	CDK5RAP2	-0.259328	0.103998	-2.49358	0.0126461	0.129868	0	3.89747	0.56427	-1.35826	-0.386635	0.840605	-2.18498	-1.10438	-1.19192	-0.227655	-0.193771	0.275536	-0.390097	-0.365806	-0.678459	0.0280923	0.251173	0.107442	0.031875	0.109715	0.324008
10370	CITED2	-0.259003	0.103914	-2.49247	0.0126857	0.130126	0	2.27056	0.810581	-1.31168	0.0340641	-0.904248	-1.29814	-2.0634	-0.0293659	-0.2198	0.0170323	-0.296616	-0.230353	-0.697786	-0.0164162	0.0280801	0.250009	0.1076	0.0314878	0.114361	0.312507
57520	HECW2	-0.278196	0.111709	-2.49035	0.0127616	0.130689	7.14988	5.38502	0.370718	-1.46708	-1.19498	0.766218	-2.46184	-0.249153	-1.54767	-0.246026	-0.611287	0.250954	-0.440657	-0.0818964	-0.892303	0.0281226	0.261677	0.107271	0.0320391	0.108043	0.332405
79746	ECHDC3	-0.258723	0.103899	-2.49013	0.0127696	0.130689	0	2.07329	0.838913	-0.680407	-0.426349	-0.404638	-2.50892	-0.948704	-0.520438	-0.113767	-0.213782	-0.132158	-0.449294	-0.313573	-0.291924	0.0279573	0.251428	0.106672	0.0320691	0.109248	0.31463
5635	PRPSAP1	-0.258814	0.104013	-2.48829	0.0128361	0.13122	0	3.68182	0.596072	-1.02923	-0.52354	0.298538	-2.18079	-1.91672	0.145667	-0.17227	-0.262898	0.0974569	-0.389334	-0.645562	0.081452	0.0280154	0.25216	0.106568	0.0318727	0.113438	0.312666
168455	CCDC71L	-0.258444	0.103949	-2.48625	0.0129096	0.131744	0	3.32433	0.65012	-2.15743	0.256302	0.0351135	-0.852294	-1.57558	-1.25519	-0.36339	0.128283	0.0114561	-0.150954	-0.526349	-0.715914	0.0283709	0.250514	0.106444	0.0313696	0.1116	0.325313
3797	KIF3C	-0.289775	0.11656	-2.48606	0.0129166	0.131744	11.5511	5.65298	0.341462	-2.37023	0.768648	0.682657	-1.9189	-1.42527	-1.27152	-0.399914	0.387922	0.223407	-0.341849	-0.474679	-0.725618	0.0284677	0.254703	0.107099	0.031737	0.110919	0.325663
6533	SLC6A6	-0.26776	0.107726	-2.48556	0.0129348	0.131779	3.45241	5.17879	0.394452	-2.17156	-0.033619	0.349517	-0.736769	-2.01767	-1.52248	-0.36581	-0.0168098	0.114124	-0.130446	-0.681435	-0.87688	0.028377	0.250009	0.106614	0.031347	0.114064	0.331723
126731	CCSAP	-0.258027	0.103892	-2.4836	0.013006	0.132197	0	2.31721	0.803735	-1.73834	0.269729	-0.24131	-2.03987	-0.00254323	-1.08241	-0.29196	0.135018	-0.078759	-0.363746	-0.000835615	-0.61415	0.0282084	0.25057	0.106524	0.0317974	0.107955	0.321929
9141	PDCD5	0.258306	0.10402	2.48323	0.0130199	0.132197	0	4.45856	0.485447	2.2426	1.26219	0.987719	-0.0858756	1.04692	1.38693	0.377987	0.647416	0.324337	-0.0151884	0.346488	0.794659	0.0284085	0.263098	0.107827	0.0312814	0.109534	0.328287
440275	EIF2AK4	0.27957	0.112579	2.48333	0.0130159	0.132197	7.89314	5.42848	0.365852	2.77637	2.06556	0.21377	0.477755	0.603795	0.20617	0.470183	1.10938	0.0697647	0.0845349	0.198863	0.115314	0.02868	0.28846	0.106507	0.0313085	0.108475	0.312832
838	CASP5	-0.397152	0.159994	-2.48229	0.0130543	0.132338	43.9869	8.92648	0.112033	-3.01795	-2.52375	0.818561	-2.9769	-0.460885	-0.652378	-0.512376	-1.40997	0.268245	-0.53586	-0.151642	-0.366646	0.0288239	0.312126	0.107389	0.0324022	0.108257	0.315861
6809	STX3	-0.257743	0.103856	-2.48174	0.0130744	0.132338	0	1.96561	0.853883	-1.71331	-0.266625	0.299586	-1.59715	-0.96091	-1.24664	-0.287712	-0.133461	0.0977994	-0.283895	-0.317657	-0.71084	0.0281998	0.250557	0.106568	0.0315954	0.109282	0.325132
64844	2019-03-07	-0.258023	0.103973	-2.48164	0.0130779	0.132338	0	3.12491	0.680736	-0.831137	-0.727559	-2.22984	-1.72212	-0.221956	-0.276007	-0.139025	-0.366826	-0.752531	-0.306358	-0.0729503	-0.15444	0.0279795	0.254205	0.113894	0.0316472	0.108025	0.313096
8870	IER3	-0.257915	0.103967	-2.48075	0.0131108	0.132522	0	3.37165	0.642891	-1.94361	0.0437865	-1.59529	-1.35546	0.599984	-1.00199	-0.32687	0.0218939	-0.529412	-0.240596	0.197602	-0.567295	0.0282834	0.250015	0.11013	0.0315067	0.108468	0.320546
6400	SEL1L	-0.267126	0.107737	-2.47942	0.0131596	0.132866	3.42262	5.1772	0.39464	-2.49156	-0.290312	-1.91456	0.122445	-1.298	-0.109974	-0.420825	-0.145348	-0.640266	0.0216566	-0.431283	-0.0614866	0.0285273	0.25066	0.111837	0.0312824	0.110402	0.312595
4900	NRGN	-0.257793	0.10407	-2.47711	0.013245	0.133553	0	4.49801	0.48015	-1.93797	0.178757	0.846231	-2.31478	-0.858676	0.186553	-0.325908	0.0894231	0.277397	-0.413751	-0.283509	0.104331	0.0282812	0.25025	0.107455	0.0319493	0.109012	0.312772
29081	METTL5	0.257142	0.103821	2.47678	0.0132573	0.133553	0	1.35787	0.928866	0.837869	0.351126	1.05767	1.99609	0.588459	1.10347	0.140154	0.175902	0.34764	0.355815	0.193788	0.626468	0.0279806	0.250967	0.108033	0.0317751	0.108449	0.322312
9148	NEURL1	0.257159	0.103872	2.47574	0.0132962	0.133795	0	1.94414	0.856819	1.21333	0.0386823	0.0303621	2.32861	0.585599	0.912938	0.203232	0.0193416	0.00990587	0.416278	0.192842	0.515749	0.0280558	0.250012	0.106444	0.0319574	0.108444	0.31915
4277	MICB	-0.25756	0.10406	-2.47512	0.0133192	0.133876	0	4.40053	0.493302	-0.670563	-0.591655	-0.00806394	-2.90868	-1.04362	0.42121	-0.112119	-0.297459	-0.00263091	-0.523155	-0.345379	0.235987	0.027956	0.252765	0.106443	0.0323497	0.109524	0.313892
51207	DUSP13	-0.257315	0.104034	-2.47339	0.0133839	0.134042	0	4.37545	0.496719	-2.07501	-1.37949	-0.542764	-1.43369	0.923877	-1.03963	-0.349292	-0.711218	-0.177424	-0.254591	0.305272	-0.589187	0.028336	0.265807	0.106857	0.0315337	0.109181	0.321179
8548	BLZF1	-0.256837	0.103844	-2.4733	0.0133871	0.134042	0	1.28282	0.93669	-1.65236	-0.202735	-1.62131	-1.38445	-0.288565	-0.00564418	-0.277377	-0.101433	-0.538354	-0.24578	-0.0948641	-0.00315519	0.0281795	0.250322	0.110256	0.0315165	0.108073	0.3125
9473	THEMIS2	-0.25709	0.103961	-2.47295	0.0134004	0.134042	0	2.98408	0.70244	-0.361946	-0.70072	-1.55064	-2.38068	-0.557503	-0.307568	-0.0604841	-0.353079	-0.514103	-0.425794	-0.183551	-0.172139	0.0279251	0.253896	0.10992	0.0319888	0.108398	0.313241
4642	MYO1D	0.25684	0.103887	2.47229	0.013425	0.134042	0	2.13052	0.830806	1.46549	0.352169	0.975028	2.03237	-0.47852	0.812931	0.245758	0.176427	0.320117	0.362387	-0.157462	0.458243	0.0281221	0.250973	0.107791	0.0317935	0.108281	0.31775
23552	CDK20	0.256681	0.103822	2.47232	0.0134239	0.134042	0	1.40358	0.923921	2.16244	0.0343259	0.518868	0.939018	0.683112	1.10499	0.364248	0.0171633	0.169584	0.166364	0.225139	0.627356	0.0283731	0.250009	0.106821	0.0313887	0.108621	0.322339
26275	HIBCH	0.278644	0.112664	2.47323	0.0133898	0.134042	7.99338	5.43439	0.365194	1.91676	-0.437391	-0.611675	2.41915	1.69312	-0.376194	0.322296	-0.219352	-0.200055	0.432834	0.567098	-0.210672	0.0282731	0.251504	0.106969	0.0320124	0.112186	0.31361
51279	C1RL	-0.256579	0.103917	-2.46907	0.0135465	0.134769	0	2.61233	0.759491	-2.11591	-0.337538	0.618106	-1.34591	-1.11147	-0.82991	-0.356285	-0.16907	0.202169	-0.238889	-0.368193	-0.46798	0.0283531	0.250893	0.10698	0.0315035	0.109738	0.317975
51132	RLIM	-0.256535	0.103923	-2.46851	0.0135676	0.134769	0	3.14055	0.678327	-0.821504	0.214036	-1.8444	-1.64506	-0.678632	-1.39458	-0.13741	0.107095	-0.615682	-0.2925	-0.223653	-0.799269	0.0279779	0.250358	0.11143	0.0316148	0.108613	0.328471
51155	JPT1	-0.256592	0.103962	-2.46813	0.0135819	0.134769	0	3.35608	0.645268	-2.47811	0.408371	-0.93359	-0.356008	-1.09657	-0.969116	-0.418504	0.20472	-0.30635	-0.0629803	-0.363177	-0.548226	0.0285205	0.25131	0.107677	0.031296	0.10969	0.320014
50813	COPS7A	-0.256158	0.103807	-2.46763	0.0136011	0.134769	0	0.810508	0.976358	-1.3438	-0.252235	-0.710105	-1.53894	-1.4689	-0.00685474	-0.225215	-0.126243	-0.232448	-0.273449	-0.489629	-0.00383192	0.0280885	0.250498	0.107154	0.0315726	0.111109	0.3125
6525	SMTN	-0.256312	0.103871	-2.46759	0.0136027	0.134769	0	3.15601	0.675948	-1.34252	-0.212882	-1.014	-1.50344	-0.111777	-2.02393	-0.225001	-0.106516	-0.333085	-0.267085	-0.0367288	-1.19421	0.0280882	0.250355	0.107902	0.0315592	0.107972	0.348153
23059	CLUAP1	0.256387	0.10383	2.46929	0.0135382	0.134769	0	1.18892	0.945936	1.16545	-0.0473516	1.12549	2.07007	0.314052	0.524631	0.195172	-0.0236766	0.370297	0.369222	0.103253	0.294292	0.0280447	0.250018	0.108247	0.0318131	0.108095	0.314665
54870	QRICH1	0.327203	0.132492	2.4696	0.0135263	0.134769	25.1454	6.67961	0.245579	2.53141	0.849887	1.25398	2.93557	-1.18366	-0.0282115	0.427707	0.429822	0.413418	0.528159	-0.392542	-0.0157709	0.0285476	0.255773	0.108691	0.0323702	0.109982	0.312506
4001	LMNB1	-0.25632	0.103898	-2.46703	0.013624	0.134831	0	2.48559	0.778664	-2.07562	0.342322	-1.27739	-0.561296	-1.07699	-1.01968	-0.349398	0.171476	-0.421301	-0.0993336	-0.356593	-0.577572	0.0283363	0.250919	0.108778	0.0313191	0.109628	0.32084
4985	OPRD1	0.256048	0.103861	2.46531	0.0136897	0.135332	0	1.55721	0.906374	2.0451	-0.33388	1.20871	1.30763	0.411957	-0.0215906	0.344183	-0.167231	0.398193	0.232047	0.135506	-0.0120696	0.0283237	0.250874	0.108529	0.0314909	0.108196	0.312504
1432	MAPK14	-0.25584	0.103992	-2.46018	0.0138869	0.137131	0	4.13576	0.53004	-2.27191	0.663259	-0.761626	-0.453517	-1.42868	-1.3266	-0.383015	0.333933	-0.249438	-0.0802427	-0.475847	-0.758464	0.0284218	0.253485	0.107261	0.0313057	0.110934	0.326882
22978	NT5C2	-0.255475	0.10389	-2.45909	0.0139289	0.137395	0	2.17783	0.824032	-1.91352	0.316828	-0.4582	-1.92159	0.182854	-0.726053	-0.321744	0.158663	-0.149697	-0.342335	0.0600925	-0.408577	0.0282718	0.250787	0.106737	0.0317383	0.108002	0.316673
5355	PLP2	-0.255819	0.104062	-2.45834	0.0139582	0.137534	0	4.62293	0.463606	-1.71449	-0.814771	1.23321	-2.0582	-0.945219	-0.642305	-0.287913	-0.411678	0.40643	-0.36707	-0.312407	-0.360925	0.0282002	0.255296	0.108616	0.0318069	0.109239	0.315757
6483	ST3GAL2	-0.364886	0.148561	-2.45614	0.014044	0.13809	36.7366	7.90346	0.161637	-0.916331	-0.440034	-2.1219	-1.0171	-3.09717	-0.210276	-0.153315	-0.220686	-0.713746	-0.180251	-1.08864	-0.117613	0.027994	0.251522	0.113146	0.0314075	0.123548	0.312846
3606	IL18	-0.255552	0.104048	-2.4561	0.0140454	0.13809	0	4.30826	0.505939	-2.51201	-0.0907066	0.839857	-1.52316	-0.973079	0.223616	-0.424356	-0.0453591	0.275288	-0.270621	-0.32173	0.125083	0.0285377	0.250064	0.10744	0.0315666	0.109317	0.312891
29121	CLEC2D	0.255126	0.103957	2.45416	0.0141215	0.138687	0	3.69765	0.593714	1.61684	-1.05068	0.403608	1.53186	1.24425	1.39456	0.27136	-0.534644	0.131821	0.272179	0.413044	0.799253	0.0281681	0.258933	0.106671	0.0315699	0.110199	0.32847
6890	TAP1	-0.254787	0.103909	-2.45201	0.014206	0.139364	0	2.4115	0.789761	-1.53139	-0.859316	0.201509	-2.00456	-1.01018	0.510841	-0.256897	-0.434703	0.065761	-0.357348	-0.334161	0.286505	0.0281415	0.255905	0.106499	0.0317794	0.109424	0.314552
9709	HERPUD1	-0.254042	0.103956	-2.44375	0.0145357	0.142443	0	3.0475	0.692663	-0.969529	-0.0390902	-0.735602	-2.71839	0.131747	-0.360243	-0.162244	-0.0195456	-0.240853	-0.487876	0.0432922	-0.201709	0.0280038	0.250012	0.107206	0.0322103	0.107979	0.313517
5691	PSMB3	-0.25382	0.103896	-2.44303	0.0145646	0.142533	0	2.20207	0.820537	-1.88884	0.615041	-0.475311	-1.44254	-1.37925	0.123634	-0.317542	0.309354	-0.155304	-0.256175	-0.458952	0.0691265	0.0282625	0.252991	0.10676	0.0315369	0.110726	0.312619
10844	TUBGCP2	0.253982	0.103975	2.44273	0.0145765	0.142533	0	3.73616	0.587992	2.08572	1.32724	1.05842	0.926403	-0.618838	1.10899	0.351124	0.682675	0.34789	0.164122	-0.203842	0.6297	0.0283405	0.264564	0.108035	0.0313858	0.108501	0.322413
1845	DUSP3	-0.253578	0.103854	-2.44168	0.0146193	0.142796	0	1.6866	0.890584	-1.61719	0.21511	-1.03513	-0.962553	-1.68503	-0.386624	-0.27142	0.107633	-0.340123	-0.170549	-0.56428	-0.216534	0.0281682	0.250362	0.107965	0.0313942	0.112144	0.313672
23252	OTUD3	0.253366	0.103798	2.44095	0.0146486	0.142927	0	1.06533	0.957126	1.47277	0.601114	0.695048	1.77459	-0.0638981	0.925668	0.246987	0.302268	0.227487	0.315808	-0.0209952	0.523097	0.0281242	0.252855	0.107124	0.0316701	0.10796	0.319341
284001	CCDC57	0.253583	0.10396	2.43923	0.0147184	0.143453	0	3.73921	0.587541	2.40059	0.158411	-0.593189	1.25898	0.430077	1.33388	0.405141	0.0792368	-0.193981	0.22336	0.14148	0.762822	0.0284823	0.250196	0.106938	0.0314754	0.108218	0.327047
24138	IFIT5	-0.260806	0.10705	-2.4363	0.0148384	0.144129	2.83075	5.14566	0.398364	-3.06082	0.084182	-0.133415	-1.17094	-0.378278	0.860209	-0.519898	0.0420956	-0.0435325	-0.207653	-0.124406	0.485382	0.0288509	0.250055	0.106468	0.031449	0.108158	0.31839
93589	CACNA2D4	-0.253118	0.103896	-2.43626	0.0148401	0.144129	0	2.84564	0.723768	-1.25047	-1.2569	-0.349374	-1.90361	0.197491	-1.36116	-0.209485	-0.64456	-0.114077	-0.339086	0.0649052	-0.77917	0.0280648	0.262983	0.106614	0.0317297	0.10801	0.327678
7099	TLR4	-0.253121	0.103907	-2.43604	0.0148491	0.144129	0	3.16902	0.673947	-1.36153	0.0918154	-0.330447	-2.1892	0.135961	-1.52342	-0.228207	0.0459137	-0.107888	-0.390865	0.0446775	-0.877453	0.0280932	0.250066	0.106596	0.0318773	0.107981	0.331748
8836	GGH	-0.252893	0.103816	-2.43597	0.0148519	0.144129	0	1.19414	0.945438	-1.5903	-0.361946	-1.69414	-1.05214	-0.396862	-0.577437	-0.266866	-0.181344	-0.563463	-0.186488	-0.13053	-0.324151	0.0281597	0.251028	0.11062	0.0314164	0.108179	0.315127
286205	SCAI	0.253426	0.104068	2.43519	0.0148841	0.144286	0	4.69499	0.454226	1.63575	-0.557875	-0.758219	2.28523	1.35072	0.128839	0.274563	-0.280304	-0.248314	0.40836	0.449222	0.0720381	0.0281741	0.252455	0.107254	0.0319319	0.11061	0.31263
9516	LITAF	-0.252832	0.103844	-2.43473	0.0149028	0.144312	0	1.85106	0.869346	-2.11224	-0.232433	0.190906	-1.38821	-0.444289	-1.04997	-0.355657	-0.116315	0.0622992	-0.246452	-0.146168	-0.595213	0.0283516	0.250423	0.106494	0.0315178	0.108236	0.321357
10981	RAB32	-0.252673	0.103836	-2.43339	0.0149581	0.144418	0	2.00633	0.848268	-1.29168	-0.199365	-0.511568	-2.01799	-0.0150836	-1.37307	-0.216429	-0.0997446	-0.16719	-0.359781	-0.00495593	-0.786325	0.028075	0.250311	0.10681	0.0317862	0.107955	0.327958
27128	CYTH4	-0.252649	0.10383	-2.4333	0.014962	0.144418	0	1.79281	0.877006	-1.58643	0.532386	-0.989817	-1.4923	-0.494697	-1.2092	-0.26621	0.26738	-0.325035	-0.265088	-0.162802	-0.688664	0.0281585	0.252234	0.107833	0.031555	0.108303	0.324356
90850	ZNF598	0.253195	0.104038	2.43368	0.0149463	0.144418	0	4.50832	0.478771	3.05394	-0.0220556	0.369029	0.473322	0.0405689	0.8615	0.51869	-0.0110279	0.120506	0.0837499	0.0133296	0.486124	0.0288466	0.250004	0.106634	0.0313079	0.107957	0.318408
4814	NINJ1	-0.304043	0.124985	-2.43264	0.0149894	0.144528	18.9854	6.17172	0.289866	-1.03359	-0.617687	-1.64033	-3.26554	0.0813699	0.694848	-0.173002	-0.310701	-0.544899	-0.589972	0.0267364	0.390798	0.0280163	0.253017	0.110349	0.0326402	0.107964	0.316318
9050	PSTPIP2	-0.252885	0.103999	-2.43162	0.0150314	0.144778	0	3.98562	0.551489	-2.23785	-0.566555	-0.0274735	-0.295827	-1.96789	-0.780113	-0.377171	-0.284709	-0.00896341	-0.0523298	-0.66371	-0.439452	0.0284063	0.252533	0.106444	0.0312912	0.113751	0.317328
7439	BEST1	-0.347043	0.14282	-2.42993	0.0151018	0.1453	33.1118	7.47516	0.187631	-1.80682	-0.410921	0.112008	-3.166	-0.0906902	-2.4409	-0.303591	-0.206005	0.0365461	-0.571243	-0.0297992	-1.4791	0.0282324	0.251326	0.10646	0.0325552	0.107966	0.367193
272	AMPD3	-0.284968	0.117306	-2.42927	0.0151292	0.145359	12.2846	5.70025	0.336486	-1.4825	0.120474	0.829986	-3.05794	-0.941949	-0.848365	-0.248632	0.0602507	0.272023	-0.550994	-0.311313	-0.478575	0.028127	0.250113	0.107416	0.0324665	0.10923	0.318226
29934	SNX12	-0.253535	0.104385	-2.42885	0.0151467	0.145359	0.321779	5.01614	0.413914	-0.352723	0.466428	-0.411794	-2.50669	-1.56136	-1.3094	-0.0589421	0.234011	-0.1345	-0.448885	-0.521437	-0.748185	0.0279244	0.251711	0.106681	0.0320676	0.111532	0.326495
10011	SRA1	-0.252452	0.103958	-2.4284	0.0151656	0.145359	0	4.53601	0.47508	-1.22614	0.107865	-0.00280569	-2.21516	-0.148692	-1.99725	-0.205388	0.0539422	-0.000915372	-0.39559	-0.0488619	-1.17671	0.0280589	0.250091	0.106443	0.0318918	0.107986	0.347116
51754	TMEM8B	-0.252562	0.10401	-2.42823	0.0151725	0.145359	0	4.20961	0.519649	-0.802527	-1.1183	-0.624986	-2.52012	-0.699724	0.989995	-0.134228	-0.570406	-0.204431	-0.451349	-0.230649	0.560331	0.0279749	0.260168	0.106992	0.0320763	0.108655	0.320349
11224	RPL35	0.294693	0.121422	2.427	0.0152242	0.145699	15.9583	5.94943	0.311171	0.502934	-0.400034	0.624578	2.88465	1.13105	1.80936	0.0840621	-0.200519	0.204297	0.518688	0.374789	1.05558	0.0279369	0.251256	0.106992	0.0323315	0.109803	0.340356
23150	FRMD4B	-0.333382	0.137473	-2.42507	0.0153055	0.14617	29.1399	7.05616	0.216497	-3.09327	-0.208193	0.749412	-1.74132	-0.903153	-2.12813	-0.525598	-0.104167	0.245408	-0.309815	-0.298349	-1.26332	0.0288716	0.250339	0.107235	0.0316555	0.109126	0.3524
11252	PACSIN2	-0.254129	0.104793	-2.42506	0.0153059	0.14617	0.661919	5.03332	0.411828	-0.841904	-1.87655	0.445632	-2.37349	-0.964203	-0.0301252	-0.14083	-0.994596	0.14558	-0.42448	-0.318758	-0.0168407	0.0279813	0.280913	0.106721	0.0319844	0.109291	0.312507
57171	DOLPP1	0.251904	0.103953	2.42326	0.0153821	0.146742	0	3.55443	0.615168	0.951461	0.0687473	0.984319	2.45096	-0.414803	1.16981	0.159211	0.0343762	0.323206	0.438662	-0.136444	0.665423	0.0280004	0.250037	0.107817	0.0320322	0.1082	0.32357
3431	SP110	-0.251995	0.104018	-2.42261	0.0154095	0.146847	0	4.25776	0.512932	-2.6155	-0.576999	-0.224332	-1.24729	0.823382	-0.817924	-0.442256	-0.290012	-0.0732136	-0.221272	0.271749	-0.461105	0.0285915	0.252628	0.106513	0.0314718	0.108926	0.317815
6404	SELPLG	-0.251997	0.104049	-2.42191	0.0154391	0.146966	0	4.55072	0.473126	-1.22181	1.11006	-0.998796	-1.86844	-1.75665	0.341836	-0.204658	0.566037	-0.328022	-0.332734	-0.58926	0.191372	0.0280578	0.260012	0.107858	0.031713	0.112523	0.313416
1659	DHX8	-0.251618	0.103908	-2.42155	0.0154546	0.146966	0	2.62819	0.757077	-1.15775	-0.24098	-0.875634	-1.51238	-1.92974	0.561856	-0.193877	-0.1206	-0.287132	-0.268687	-0.650174	0.315334	0.0280429	0.250455	0.107527	0.0315626	0.113517	0.314986
286006	LSMEM1	-0.251247	0.10386	-2.41909	0.0155593	0.14778	0	2.66974	0.750743	-1.50555	-0.39091	0.327088	-1.47559	-1.16378	-1.56956	-0.252528	-0.195923	0.106789	-0.262094	-0.385829	-0.905747	0.0281338	0.2512	0.106593	0.0315489	0.109913	0.333009
334	APLP2	-0.25154	0.103995	-2.41877	0.0155731	0.14778	0	3.82229	0.575275	-0.661192	0.289051	-0.2691	-2.21546	-2.00211	-0.403618	-0.110549	0.144715	-0.0878372	-0.395644	-0.675888	-0.22609	0.0279548	0.250654	0.106544	0.031892	0.113965	0.313778
55275	VPS53	-0.251644	0.104066	-2.41813	0.0156006	0.147885	0	4.71711	0.45137	-0.244753	-1.74337	-1.77099	-1.98185	-0.63047	-0.0595359	-0.0408952	-0.916287	-0.590101	-0.353237	-0.207694	-0.0332831	0.0279182	0.276237	0.111024	0.031768	0.108522	0.312528
6283	S100A12	-0.263282	0.108977	-2.41595	0.0156942	0.148616	4.66127	5.24446	0.38678	-2.71982	-0.954817	0.515026	-1.10757	0.144211	-1.41817	-0.460352	-0.484358	0.168324	-0.196358	0.0473891	-0.813499	0.0286482	0.257331	0.106815	0.0314312	0.107984	0.329045
80216	ALPK1	-0.279201	0.115608	-2.41507	0.015732	0.148661	10.724	5.60061	0.34704	-1.46863	0.226435	0.911433	-2.71063	-1.42067	-0.912425	-0.246288	0.113309	0.298999	-0.486443	-0.473104	-0.515453	0.028123	0.250401	0.107619	0.0322049	0.1109	0.319142
4150	MAZ	0.251122	0.103976	2.41519	0.0157269	0.148661	0	4.41003	0.492011	1.35924	1.14599	0.0540506	2.02304	-0.492887	1.65644	0.22782	0.585129	0.0176346	0.360697	-0.162205	0.959468	0.0280926	0.260699	0.106447	0.0317888	0.108301	0.335514
51024	FIS1	0.250897	0.103909	2.41457	0.0157536	0.148709	0	2.54657	0.769465	2.26471	1.14757	0.107506	1.29675	-0.266476	0.40838	0.38178	0.585971	0.0350772	0.230105	-0.0875955	0.228769	0.0284185	0.26073	0.106459	0.0314874	0.108056	0.313808
10783	NEK6	-0.250784	0.103899	-2.41374	0.0157897	0.148889	0	2.41974	0.788531	-0.73067	-0.528569	-0.0138748	-2.27939	-1.44886	-0.370985	-0.122186	-0.265446	-0.00452674	-0.407294	-0.482757	-0.207745	0.0279642	0.252202	0.106443	0.0319285	0.111021	0.313579
4664	NAB1	-0.250745	0.103898	-2.41337	0.0158058	0.148889	0	2.71233	0.744232	-1.13245	-1.83602	-0.974987	-1.3473	-0.196761	-1.03861	-0.189621	-0.970555	-0.320103	-0.239137	-0.0646653	-0.588594	0.0280372	0.279437	0.107791	0.0315039	0.10801	0.321161
11161	ERG28	0.250785	0.103953	2.41248	0.0158444	0.149097	0	4.13292	0.530442	1.98332	0.618574	-0.211113	1.62185	-0.388148	1.67665	0.33364	0.311153	-0.0688968	0.28833	-0.127658	0.972057	0.0282989	0.253026	0.106505	0.0316053	0.108169	0.336122
10419	PRMT5	-0.25082	0.104038	-2.41085	0.0159152	0.149606	0	4.78357	0.442861	-1.30154	-0.159186	0.708808	-1.60989	-2.19889	-0.97321	-0.21809	-0.0796243	0.232021	-0.286183	-0.746619	-0.550599	0.0280775	0.250198	0.107151	0.0316005	0.115289	0.320079
160140	C11orf65	0.264909	0.10992	2.41001	0.0159521	0.149797	5.46421	5.289	0.381637	1.52319	-0.789243	1.86989	2.32011	-0.413874	0.0121151	0.255511	-0.39852	0.624597	0.414725	-0.136138	0.00677256	0.0281391	0.254963	0.111576	0.0319524	0.108198	0.312501
1981	EIF4G1	0.250473	0.104016	2.40802	0.0160392	0.150458	0	4.16087	0.526495	1.79985	1.67078	0.272178	1.84755	-0.298536	-0.593163	0.302406	0.874399	0.0888428	0.328963	-0.0981457	-0.333056	0.0282299	0.273893	0.106546	0.0317033	0.108081	0.315273
1465	CSRP1	-0.290542	0.120701	-2.40711	0.0160792	0.150509	15.1974	5.89605	0.316466	-2.29599	-1.84667	0.197813	-2.05388	-0.62902	1.06119	-0.38715	-0.976851	0.0645543	-0.366286	-0.207214	0.601755	0.0284328	0.27982	0.106497	0.0318046	0.10852	0.321553
10611	PDLIM5	-0.250001	0.103891	-2.40638	0.0161114	0.150509	0	2.31332	0.804308	-2.09631	-0.370031	0.450575	-1.23866	-1.34174	-0.187077	-0.352933	-0.185412	0.147199	-0.219733	-0.446165	-0.104625	0.0283449	0.251074	0.106728	0.0314692	0.110574	0.312774
80258	EFHC2	-0.363165	0.150918	-2.40638	0.0161116	0.150509	38.8194	8.17253	0.14698	-3.60618	0.226614	0.749945	-3.30811	-0.516468	-1.0287	-0.616567	0.113398	0.245584	-0.598003	-0.169992	-0.582823	0.0292324	0.250402	0.107236	0.0326775	0.108335	0.320992
55783	CMTR2	0.249909	0.103845	2.40656	0.0161034	0.150509	0	1.65028	0.895103	1.11362	-0.203732	1.02561	2.21667	0.242727	0.368406	0.186455	-0.101932	0.336952	0.395865	0.0797824	0.206295	0.0280331	0.250325	0.107936	0.0318927	0.108038	0.313564
9609	RAB36	-0.249886	0.10387	-2.40576	0.0161391	0.150609	0	2.51498	0.774237	-2.02514	-0.254107	0.376277	-1.54415	-0.301733	-1.23283	-0.340775	-0.127182	0.122877	-0.274383	-0.0991982	-0.702649	0.0283156	0.250505	0.106641	0.0315746	0.108084	0.324843
54985	HCFC1R1	-0.249518	0.103818	-2.40342	0.0162423	0.151416	0	1.28219	0.936753	-1.87982	0.00184775	-0.271274	-1.15799	-1.44458	-0.153503	-0.316006	0.000923876	-0.0885474	-0.205345	-0.481291	-0.0858362	0.0282591	0.25	0.106546	0.0314453	0.111002	0.312684
79892	MCMBP	-0.249914	0.104058	-2.40168	0.01632	0.151493	0	4.82321	0.437835	-1.3097	0.40553	-0.36688	-1.3871	-2.57216	0.192043	-0.219467	0.203288	-0.119803	-0.246253	-0.884494	0.107405	0.0280796	0.251291	0.106631	0.0315174	0.118248	0.312788
23325	WASHC4	-0.249308	0.103816	-2.40145	0.0163304	0.151493	0	1.37703	0.92681	-2.07471	-0.24019	-1.1883	-0.964196	-0.0322084	-0.662648	-0.349241	-0.120204	-0.391341	-0.170841	-0.0105826	-0.372482	0.0283359	0.250452	0.108458	0.0313946	0.107956	0.315969
135112	NCOA7	-0.249183	0.103788	-2.40087	0.0163561	0.151493	0	0.850571	0.973696	-2.15455	-0.357121	-0.371458	-1.22736	-0.359542	-0.267321	-0.362897	-0.178918	-0.1213	-0.217716	-0.118233	-0.149571	0.0283697	0.251	0.106636	0.0314657	0.108138	0.313059
729359	PLIN4	-0.260976	0.108713	-2.40059	0.0163685	0.151493	4.39924	5.23008	0.388451	-3.16575	0.460565	-0.912288	-0.441808	-0.633083	0.242695	-0.538351	0.23105	-0.299282	-0.0781694	-0.208559	0.135771	0.0289187	0.251668	0.107621	0.0313044	0.108527	0.312961
10424	PGRMC2	0.249819	0.104038	2.40123	0.0163402	0.151493	0	4.44321	0.487518	2.33191	0.235588	1.40625	1.28516	-1.0212	0.209305	0.393323	0.117897	0.464883	0.228034	-0.337855	0.117069	0.0284495	0.250434	0.109286	0.0314837	0.109456	0.312843
246	ALOX15	0.249307	0.103807	2.40164	0.0163219	0.151493	0	1.64243	0.896071	1.61354	0.41045	1.50266	0.780967	0.531387	1.21985	0.270801	0.205767	0.497701	0.138289	0.17492	0.694965	0.028167	0.251323	0.109702	0.0313553	0.108357	0.324574
8036	SHOC2	0.249637	0.103897	2.40273	0.016273	0.151493	0	2.58371	0.763839	1.81203	0.333292	1.06264	1.79771	-0.095133	-0.769623	0.304476	0.166936	0.349296	0.319974	-0.0312592	-0.433453	0.0282343	0.250871	0.108048	0.0316805	0.107967	0.317197
50999	TMED5	-0.249259	0.103934	-2.39825	0.0164738	0.152075	0	2.93792	0.709556	-0.41999	-1.16552	-1.69901	-1.96159	-0.634118	-0.134587	-0.0701893	-0.595538	-0.565146	-0.34957	-0.208902	-0.0752535	0.0279295	0.261083	0.110645	0.0317579	0.108529	0.312642
6729	SRP54	-0.249047	0.103862	-2.39787	0.0164906	0.152075	0	1.99017	0.850504	-1.56967	0.245547	-1.74964	-0.866234	-1.11668	-0.396504	-0.263374	0.122889	-0.582686	-0.15343	-0.369949	-0.222089	0.0281532	0.250472	0.11091	0.0313725	0.109755	0.313733
7405	UVRAG	-0.248853	0.103802	-2.39737	0.016513	0.152075	0	1.1205	0.952273	-1.81734	-0.631574	-1.13209	-1.11842	-0.671839	0.427117	-0.305379	-0.317774	-0.372505	-0.198293	-0.221401	0.239312	0.0282362	0.253156	0.108268	0.0314341	0.1086	0.313932
863	CBFA2T3	-0.249003	0.103873	-2.39719	0.0165211	0.152075	0	2.03793	0.843873	-1.5079	-1.21599	0.138938	-1.97951	-0.299465	-0.0680798	-0.252925	-0.622549	0.0453349	-0.352813	-0.0984517	-0.03806	0.0281345	0.262111	0.10647	0.0317668	0.108082	0.312536
80776	B9D2	-0.26732	0.111535	-2.39673	0.016542	0.152075	6.9635	5.37423	0.371934	-1.70212	0.766942	0.443162	-2.21746	-1.91945	0.0757863	-0.285815	0.387045	0.144771	-0.396009	-0.64653	0.0423688	0.028196	0.254681	0.106718	0.0318931	0.113455	0.312545
115825	WDFY2	-0.248689	0.103787	-2.39615	0.0165685	0.152075	0	0.872884	0.972154	-1.31945	-1.32916	-0.906029	-1.40153	-0.436668	-0.361853	-0.221109	-0.683719	-0.297206	-0.248836	-0.143654	-0.202614	0.0280821	0.264608	0.107605	0.0315224	0.108226	0.313526
51605	TRMT6	-0.249112	0.103973	-2.39592	0.0165789	0.152075	0	3.61582	0.60594	-0.81617	-1.06817	-0.49114	-1.30958	-2.36016	-0.150112	-0.136516	-0.543871	-0.160492	-0.232396	-0.805547	-0.083939	0.0279771	0.259244	0.106781	0.0314915	0.116493	0.312676
2162	F13A1	-0.40435	0.168774	-2.39581	0.0165836	0.152075	48.9184	9.78827	0.0814618	-1.05866	0.832042	-2.40657	-1.79656	-3.11128	-0.620569	-0.177216	0.420596	-0.816898	-0.319767	-1.09432	-0.348591	0.0280214	0.255528	0.115223	0.03168	0.123712	0.315538
51497	NELFCD	0.249214	0.1039	2.39859	0.0164581	0.152075	0	2.7599	0.736943	1.89229	0.351332	1.71976	0.949285	-0.334579	0.915578	0.318129	0.176006	0.572329	0.16819	-0.110012	0.517272	0.0282638	0.250968	0.110753	0.031391	0.108114	0.319189
10184	LHFPL2	-0.417372	0.174254	-2.39519	0.0166116	0.152177	52.0006	10.4168	0.0642509	-3.58995	0.128616	-3.35296	-0.979908	-0.0346662	-0.924477	-0.61366	0.0643246	-1.18508	-0.173635	-0.0113902	-0.522409	0.02922	0.250129	0.124922	0.0313983	0.107956	0.319323
83464	APH1B	-0.248325	0.103728	-2.39401	0.0166652	0.152454	0	0.20375	0.999073	-1.35926	-0.652552	-0.59198	-1.50387	-0.66271	-0.781273	-0.227823	-0.328469	-0.193583	-0.267161	-0.218375	-0.440116	0.0280926	0.253372	0.106936	0.0315594	0.108582	0.317343
63899	NSUN3	-0.288764	0.120631	-2.39378	0.0166757	0.152454	15.0851	5.88825	0.317245	-1.99645	-0.389028	0.279978	-1.08506	-2.82826	-0.148115	-0.335879	-0.194976	0.0913914	-0.19235	-0.982403	-0.0828218	0.0283041	0.251188	0.106552	0.0314251	0.120653	0.312671
64780	MICAL1	-0.262088	0.109589	-2.39156	0.016777	0.153224	5.20374	5.27447	0.38331	-2.55862	0.304313	1.065	-1.79694	-0.864837	-0.500278	-0.432412	0.152377	0.350085	-0.319835	-0.285563	-0.280543	0.0285616	0.250726	0.108055	0.0316801	0.109028	0.314468
1230	CCR1	-0.248604	0.10402	-2.38997	0.0168497	0.153732	0	4.32871	0.503123	-2.20848	0.864419	-1.60265	-0.933231	-0.816515	0.556759	-0.372135	0.437346	-0.531938	-0.165335	-0.269462	0.312451	0.0283932	0.255977	0.110166	0.0313873	0.10891	0.314941
51635	DHRS7	-0.248166	0.10397	-2.38691	0.0169907	0.15476	0	3.66723	0.598248	-1.06825	-0.0729252	-0.278034	-2.73582	0.322778	-0.742894	-0.178826	-0.0364656	-0.0907564	-0.491098	0.106126	-0.418186	0.0280234	0.250042	0.106551	0.0322226	0.108103	0.316872
2776	GNAQ	-0.247967	0.10391	-2.38635	0.0170164	0.15476	0	3.75941	0.584549	-1.9343	-0.396084	0.500994	-1.06921	-1.04753	-1.75048	-0.325283	-0.198529	0.163722	-0.189528	-0.346693	-1.01833	0.0282798	0.251232	0.106795	0.0314209	0.109536	0.338425
1050	CEBPA	-0.247902	0.103916	-2.3856	0.0170511	0.15476	0	2.94598	0.708314	-2.38451	-0.847926	-0.771762	-0.666809	-0.783827	0.759978	-0.402373	-0.428808	-0.252784	-0.118036	-0.258585	0.427941	0.0284746	0.255746	0.107283	0.031335	0.108834	0.317078
4317	MMP8	-0.247623	0.10383	-2.38489	0.017084	0.15476	0	2.57544	0.765093	-1.88932	0.194103	-0.539758	-1.0342	-0.544193	-1.73173	-0.317623	0.0971085	-0.176438	-0.183296	-0.179152	-1.00653	0.0282627	0.250295	0.106852	0.0314118	0.108377	0.337828
11177	BAZ1A	-0.247584	0.103834	-2.38442	0.0171062	0.15476	0	2.17248	0.824801	-2.09142	0.0289354	-0.314106	-0.713406	-1.11698	-1.27586	-0.352097	0.0144679	-0.102545	-0.126301	-0.37005	-0.728197	0.0283428	0.250007	0.106581	0.0313429	0.109756	0.325757
54557	SGTB	-0.247465	0.103805	-2.38393	0.0171287	0.15476	0	1.19312	0.945536	-1.69596	0.0216823	-1.09608	-1.02302	-1.3201	0.0941411	-0.28477	0.0108412	-0.360462	-0.181306	-0.438799	0.0526323	0.028194	0.250004	0.108152	0.031409	0.110488	0.312569
29967	LRP12	-0.389013	0.163184	-2.38389	0.0171306	0.15476	46.0676	9.27087	0.0987359	-2.69749	0.877194	-1.93755	-0.379223	-2.17409	-1.92189	-0.456474	0.443967	-0.648351	-0.0670894	-0.737636	-1.1277	0.0286359	0.25616	0.111974	0.0312981	0.115114	0.344293
127829	ARL8A	-0.247676	0.103899	-2.38381	0.0171344	0.15476	0	2.56936	0.766015	-1.66333	0.18646	-1.47086	-0.718191	-1.66432	0.0359563	-0.279237	0.0932806	-0.486857	-0.12715	-0.557082	0.0201005	0.0281831	0.250272	0.109561	0.0313437	0.112038	0.31251
81669	CCNL2	0.247636	0.103852	2.38451	0.0171019	0.15476	0	1.89487	0.863492	1.77649	0.868704	-0.0547126	1.33039	1.32789	-0.366034	0.298437	0.439566	-0.0178506	0.236115	0.441449	-0.204963	0.0282216	0.256038	0.106447	0.0314983	0.110519	0.31355
143686	SESN3	0.248204	0.104026	2.38598	0.0170335	0.15476	0	4.46238	0.484932	1.9446	0.457214	1.60659	1.40772	-1.11615	0.596822	0.327038	0.229358	0.533292	0.249944	-0.369772	0.335129	0.0282838	0.251644	0.110185	0.0315246	0.109754	0.315308
51816	ADA2	-0.247334	0.103818	-2.38238	0.0172013	0.154968	0	1.49322	0.913851	-1.49806	-0.104804	-1.18998	-1.44264	-1.03308	0.590988	-0.251262	-0.0524109	-0.391904	-0.256193	-0.341842	0.331824	0.0281316	0.250086	0.108463	0.0315369	0.109492	0.315253
113201	CASC4	-0.249931	0.104915	-2.38223	0.0172083	0.154968	0.799327	5.04029	0.410983	-1.64631	0.423672	0.637241	-2.73911	-0.218654	-0.139858	-0.276352	0.212433	0.208461	-0.491707	-0.0718646	-0.0782019	0.0281776	0.25141	0.107014	0.032225	0.108022	0.312653
8878	SQSTM1	0.328413	0.137861	2.38221	0.0172091	0.154968	29.5649	7.09874	0.2134	3.7658	-0.369282	0.508066	2.436	-0.533835	0.42469	0.645239	-0.185036	0.166041	0.43592	-0.175729	0.237946	0.029358	0.25107	0.106805	0.0320228	0.108361	0.313915
6195	RPS6KA1	-0.247082	0.103787	-2.38065	0.0172819	0.155468	0	1.21391	0.943536	-1.92191	-0.136824	-0.339736	-0.871864	-1.23158	-0.881244	-0.323173	-0.0684323	-0.110925	-0.15443	-0.408752	-0.497483	0.028275	0.250146	0.106604	0.0313737	0.110153	0.318687
10970	CKAP4	-0.319367	0.134262	-2.37869	0.0173744	0.156144	26.4192	6.79525	0.236318	-0.907753	-0.351223	0.0111267	-1.75719	-2.95353	-1.36004	-0.151876	-0.175951	0.00363014	-0.312674	-1.03142	-0.778497	0.0279925	0.250967	0.106443	0.0316624	0.121952	0.327651
3142	HLX	-0.318018	0.133742	-2.37785	0.0174138	0.156342	26.158	6.77122	0.238219	-2.2926	-0.767609	1.3794	-2.75255	-1.40806	-0.648724	-0.386568	-0.387388	0.45578	-0.494192	-0.468792	-0.364571	0.0284313	0.25469	0.109176	0.0322346	0.110846	0.315823
55002	TMCO3	-0.246806	0.103875	-2.37599	0.0175019	0.156885	0	3.18131	0.672056	-1.22964	0.154744	-0.798896	-0.940786	-1.78169	-1.61027	-0.205977	0.0774008	-0.261745	-0.166679	-0.598023	-0.930843	0.0280597	0.250187	0.107344	0.0313891	0.11266	0.334162
10845	CLPX	0.247251	0.104069	2.37584	0.0175091	0.156885	0	4.99219	0.416834	1.47098	0.97407	1.3422	2.10008	-1.13557	-0.151258	0.246684	0.49442	0.443184	0.374667	-0.376315	-0.0845798	0.0281237	0.257639	0.109027	0.0318289	0.109818	0.312679
27439	TMEM121B	-0.246744	0.103874	-2.37541	0.0175294	0.15691	0	2.229	0.816637	-2.17484	-0.710108	-1.27997	-0.941198	0.0143518	0.33616	-0.366372	-0.357885	-0.422171	-0.166752	0.00471549	0.188185	0.0283785	0.254003	0.108788	0.0313892	0.107955	0.313385
9749	PHACTR2	-0.246851	0.103946	-2.37481	0.017558	0.15701	0	3.36659	0.643664	-2.36531	-0.925204	0.685803	-0.92281	-0.910648	-0.635951	-0.399067	-0.468916	0.224443	-0.163483	-0.300852	-0.357318	0.0284654	0.256871	0.107105	0.0313849	0.109145	0.315692
80820	EEPD1	-0.246259	0.103803	-2.37237	0.0176742	0.157892	0	1.17139	0.947593	-1.24346	-0.837845	-0.196428	-1.98329	-0.750247	0.128291	-0.208305	-0.423594	-0.0641018	-0.353498	-0.247422	0.0717314	0.028063	0.255607	0.106497	0.0317687	0.10876	0.312629
6772	STAT1	-0.246513	0.103969	-2.37103	0.0177386	0.15831	0	4.27031	0.511189	-1.75524	0.0206421	-0.702751	-1.40978	-1.56889	1.36677	-0.294829	0.0103211	-0.230025	-0.250311	-0.524036	0.782541	0.0282142	0.250003	0.107139	0.0315253	0.111568	0.327809
28982	FLVCR1	-0.246198	0.103873	-2.37019	0.0177792	0.158515	0	2.33789	0.800685	-1.95925	-0.687694	-1.47633	-0.992152	-0.285766	0.631287	-0.329535	-0.346417	-0.488718	-0.175813	-0.093943	0.354671	0.0282894	0.25375	0.109585	0.0314013	0.108071	0.315645
535	ATP6V0A1	-0.24606	0.103964	-2.36679	0.0179432	0.159819	0	4.58943	0.468008	-1.58695	0.498495	-0.320723	-0.818256	-1.95431	-1.683	-0.266299	0.250221	-0.104708	-0.144909	-0.658885	-0.976016	0.0281586	0.251957	0.106587	0.0313626	0.113667	0.336315
2268	FGR	-0.245609	0.103793	-2.36634	0.0179651	0.159855	0	1.76559	0.880536	-1.48585	-0.0366327	-0.500425	-1.00717	-1.41665	-1.37272	-0.249198	-0.0183167	-0.163536	-0.178484	-0.47173	-0.786112	0.028128	0.25001	0.106794	0.031405	0.110883	0.327949
56935	SMCO4	-0.245876	0.103978	-2.3647	0.0180445	0.160211	0	4.29409	0.507897	-2.12333	-1.09416	-1.02749	-0.692323	-1.03951	1.25082	-0.357555	-0.557611	-0.337577	-0.122561	-0.343999	0.713321	0.0283563	0.259717	0.107942	0.0313392	0.109512	0.325221
8717	TRADD	-0.312557	0.132211	-2.36407	0.0180754	0.160211	24.8896	6.65687	0.247436	-1.74562	0.739473	0.548795	-2.55352	-2.08136	-1.29173	-0.293196	0.372937	0.179403	-0.457487	-0.704225	-0.737648	0.0282109	0.254346	0.106866	0.0320981	0.11448	0.326103
84532	ACSS1	0.245723	0.103942	2.36405	0.0180763	0.160211	0	3.31922	0.6509	2.07728	-1.18564	0.819045	1.10426	0.999944	0.544966	0.349681	-0.606289	0.268405	0.19577	0.330729	0.305782	0.028337	0.261487	0.10739	0.0314303	0.109394	0.314838
51696	HECA	0.246029	0.104034	2.3649	0.0180347	0.160211	0	4.49374	0.480721	0.705331	0.8279	0.398662	2.93137	-0.330785	0.20566	0.117942	0.418456	0.130202	0.527379	-0.108762	0.115028	0.0279607	0.255472	0.106666	0.032367	0.10811	0.312831
4125	MAN2B1	-0.245524	0.104024	-2.36025	0.0182627	0.161386	0	4.99719	0.416224	-1.14778	-0.152548	-0.279395	-2.61596	-0.779654	1.30313	-0.192199	-0.0763019	-0.091201	-0.468977	-0.257197	0.744445	0.0280407	0.250182	0.106552	0.0321397	0.108825	0.326355
57106	NAT14	0.245519	0.104021	2.36029	0.0182605	0.161386	0	4.76466	0.445271	2.23453	0.562522	-0.974725	1.69959	-0.0626395	1.08787	0.376602	0.282662	-0.320016	0.302305	-0.0205816	0.617338	0.0284048	0.252497	0.10779	0.0316375	0.10796	0.322028
5730	PTGDS	0.330107	0.139846	2.36051	0.0182501	0.161386	30.567	7.20119	0.206102	2.2756	2.09677	-0.467349	1.44764	2.21646	-0.409877	0.38365	1.12879	-0.152695	0.257089	0.752992	-0.229611	0.0284235	0.289818	0.106749	0.0315387	0.115415	0.313818
3454	IFNAR1	-0.25735	0.109105	-2.35874	0.0183373	0.161886	4.75749	5.24976	0.386166	-2.15236	0.815898	0.777563	-1.72398	-1.32657	-0.984153	-0.362522	0.41226	0.254699	-0.306693	-0.441	-0.556942	0.0283687	0.255311	0.107296	0.031648	0.110514	0.320255
5806	PTX3	-0.244705	0.103808	-2.35729	0.0184091	0.162329	0	1.3276	0.932067	-1.4016	-1.37726	-0.461234	-1.48139	-0.756849	0.207306	-0.234969	-0.709996	-0.150691	-0.263133	-0.249616	0.11595	0.0281041	0.265753	0.106741	0.031551	0.108774	0.312836
11180	WDR6	0.245001	0.103947	2.35699	0.0184235	0.162329	0	3.49881	0.623568	0.948229	0.276667	-0.0985526	2.72849	0.0516677	0.788348	0.158669	0.138499	-0.0321554	0.489743	0.0169764	0.444164	0.0279998	0.250599	0.106456	0.0322175	0.107958	0.317432
9784	SNX17	0.302856	0.128586	2.35528	0.0185088	0.162921	22.057	6.41494	0.26791	2.85585	1.32267	-0.524975	0.8057	0.778936	1.8556	0.48403	0.680191	-0.171587	0.14268	0.256958	1.08506	0.0287259	0.264458	0.10683	0.0313601	0.108823	0.341934
6199	RPS6KB2	0.312811	0.132894	2.35383	0.018581	0.163396	25.3976	6.7022	0.243747	3.09038	2.30479	-0.141033	1.20384	0.284688	0.129753	0.52509	1.26188	-0.0460188	0.213519	0.0935883	0.0725493	0.0288697	0.299761	0.10647	0.0314586	0.10807	0.312632
51157	ZNF580	0.325883	0.138612	2.35104	0.018721	0.164467	30.1335	7.1565	0.209259	3.88039	1.33897	-0.384685	1.06019	0.452745	0.556728	0.665938	0.689065	-0.125628	0.187921	0.148957	0.312434	0.0294522	0.264838	0.10665	0.0314185	0.108246	0.31494
9765	ZFYVE16	-0.243785	0.103724	-2.35031	0.0187576	0.164628	0	0.413088	0.994961	-1.43433	-0.474243	-0.695308	-1.08273	-1.14809	-0.825226	-0.240494	-0.237959	-0.227573	-0.191934	-0.380535	-0.465293	0.0281132	0.25177	0.107124	0.0314244	0.10986	0.317912
3895	KTN1	0.390535	0.166232	2.34934	0.0188069	0.164739	48.1415	9.64162	0.0860504	2.43057	1.00025	-0.229735	4.60774	-0.141815	0.790194	0.410305	0.50813	-0.0749783	0.850992	-0.0466014	0.445221	0.0284969	0.258069	0.106517	0.0341094	0.107983	0.317456
85453	TSPYL5	0.244037	0.103862	2.34963	0.018792	0.164739	0	2.65169	0.753496	1.95722	1.1886	0.108922	1.17888	-0.154849	1.22613	0.329189	0.607869	0.0355391	0.209068	-0.050886	0.698683	0.0282887	0.261547	0.106459	0.0314513	0.107989	0.324704
257106	ARHGAP30	-0.267958	0.11409	-2.34864	0.0188419	0.164831	9.29019	5.51208	0.356623	-1.21494	0.0407529	-0.372836	-1.79582	-2.59867	0.721107	-0.203502	0.020377	-0.121751	-0.319633	-0.894497	0.405757	0.0280562	0.250013	0.106638	0.0316796	0.118483	0.316616
112858	TP53RK	0.243934	0.103872	2.34841	0.018854	0.164831	0	2.31197	0.804507	2.11184	-0.252342	-0.348324	1.65916	0.576959	0.310483	0.35559	-0.126297	-0.113733	0.295034	0.189985	0.173775	0.0283514	0.250498	0.106613	0.0316206	0.108429	0.313255
79908	BTNL8	-0.3401	0.144881	-2.34745	0.0189025	0.165094	34.3953	7.62141	0.178372	-1.48649	0.129227	-0.880144	-0.738663	-2.54579	-2.31458	-0.249306	0.0646305	-0.288626	-0.130782	-0.874578	-1.39034	0.0281282	0.250131	0.107539	0.0313474	0.118019	0.360826
64979	MRPL36	0.270082	0.115223	2.34398	0.0190791	0.166314	10.3962	5.58012	0.34924	2.77985	-0.983081	-0.107549	0.974462	1.62951	0.668054	0.470789	-0.499136	-0.0350911	0.172667	0.545005	0.375554	0.028682	0.257786	0.106459	0.031397	0.111863	0.316026
374868	ATP9B	0.243243	0.103765	2.34418	0.019069	0.166314	0	0.885994	0.971227	2.05024	0.550548	0.506323	1.10609	0.143297	0.611747	0.345062	0.276587	0.16547	0.196095	0.0470887	0.343588	0.0283258	0.252391	0.106803	0.0314308	0.107984	0.315451
26262	TSPAN17	0.288221	0.123015	2.34297	0.019131	0.166604	17.4328	6.05567	0.30084	3.32605	-0.286091	0.129927	2.06694	-0.0249589	-0.574449	0.566674	-0.143229	0.042394	0.368655	-0.00820064	-0.32246	0.0290274	0.250641	0.106466	0.0318114	0.107955	0.3151
3964	LGALS8	-0.243541	0.103994	-2.34188	0.019187	0.166772	0	4.91077	0.426867	-0.140716	-1.25502	-1.42059	-1.28902	-1.69824	-1.49554	-0.0235103	-0.643546	-0.469752	-0.228723	-0.568879	-0.860434	0.0279143	0.262942	0.109346	0.0314849	0.112213	0.331009
51314	NME8	-0.243062	0.103804	-2.34154	0.0192043	0.166772	0	1.87787	0.865773	-0.658236	-0.342585	-0.555482	-1.77366	-1.38819	-1.19522	-0.110054	-0.171607	-0.181598	-0.31564	-0.462003	-0.680412	0.0279544	0.25092	0.106876	0.0316697	0.110763	0.324074
1380	CR2	0.243589	0.104031	2.34151	0.0192058	0.166772	0	4.81516	0.438852	1.98638	1.68695	-0.345454	1.08402	1.2653	-0.781631	0.334161	0.883681	-0.112795	0.192164	0.420182	-0.440321	0.0283001	0.274403	0.10661	0.0314248	0.110278	0.317347
1777	DNASE2	-0.487854	0.208386	-2.34111	0.0192263	0.166789	65.4512	14.4723	0.012872	-3.14803	-0.794916	0.995369	-3.12934	-4.0663	-0.159604	-0.535231	-0.401441	0.326882	-0.564365	-1.51041	-0.0892497	0.0289071	0.255036	0.107849	0.0325247	0.137972	0.312699
10797	MTHFD2	-0.243491	0.104041	-2.34033	0.0192666	0.166977	0	4.82961	0.437027	-1.74663	-0.935858	0.678174	-1.08379	-2.17548	0.113887	-0.293368	-0.474467	0.22193	-0.192124	-0.738138	0.0636752	0.0282112	0.257035	0.107091	0.0314247	0.115124	0.312601
10871	CD300C	-0.242992	0.103871	-2.33935	0.0193173	0.167093	0	2.33908	0.80051	-0.886778	0.388413	-0.720385	-2.11739	-1.3648	0.0971205	-0.148357	0.194666	-0.235836	-0.37781	-0.454024	0.0542984	0.0279888	0.251184	0.107174	0.0318381	0.110667	0.312574
23381	SMG5	-0.242787	0.103797	-2.33906	0.0193321	0.167093	0	1.36862	0.927715	-0.928092	-0.591725	-1.0814	-2.01569	-0.0321057	-0.628388	-0.155289	-0.297495	-0.355558	-0.359365	-0.0105488	-0.353027	0.0279961	0.252766	0.108106	0.031785	0.107956	0.315616
91869	RFT1	0.242988	0.103901	2.33864	0.0193543	0.167093	0	2.96218	0.705817	2.12649	0.0372225	0.781791	1.47204	-0.735625	0.767336	0.358095	0.0186117	0.256095	0.261459	-0.242565	0.432146	0.0283576	0.250011	0.107306	0.0315476	0.108729	0.317169
8225	GTPBP6	0.375294	0.160451	2.33899	0.0193358	0.167093	44.3974	8.99239	0.109368	1.76522	0.69012	3.50137	0.66835	0.267563	1.19886	0.296523	0.347657	1.24737	0.11831	0.0879531	0.682561	0.0282177	0.253777	0.126915	0.0313352	0.108056	0.324147
3566	IL4R	-0.301131	0.129088	-2.33275	0.019661	0.169391	22.4426	6.44684	0.265133	-0.171289	0.3645	-1.02892	-2.46537	-1.92715	-1.61824	-0.0286187	0.182629	-0.338054	-0.441303	-0.649257	-0.935772	0.0279152	0.251042	0.107946	0.0320413	0.113501	0.334392
10555	AGPAT2	-0.242414	0.103931	-2.33245	0.0196769	0.169391	0	3.26293	0.659521	-2.04432	0.106507	0.391947	-1.28459	-1.63017	0.226804	-0.34405	0.0532631	0.128004	-0.227932	-0.545233	0.126869	0.0283234	0.250089	0.106658	0.0314835	0.111866	0.312902
80173	IFT74	0.337203	0.144541	2.33291	0.0196527	0.169391	34.3279	7.61358	0.178857	2.76557	1.59509	-0.701758	3.26078	-0.10151	0.223818	0.468304	0.831279	-0.229698	0.589075	-0.0333548	0.125196	0.0286739	0.271595	0.107137	0.0326361	0.107969	0.312892
79699	ZYG11B	-0.242554	0.104012	-2.33199	0.0197014	0.16944	0	4.51236	0.478231	-1.82109	-1.54765	0.130503	-0.809558	-1.81071	0.536526	-0.306016	-0.804518	0.0425821	-0.143365	-0.608199	0.301013	0.0282375	0.270227	0.106466	0.0313608	0.112822	0.314765
293	SLC25A6	0.324334	0.139183	2.33027	0.0197917	0.170054	30.3843	7.18229	0.207432	1.99216	0.359895	1.84826	0.0136179	1.2333	2.3104	0.335147	0.180313	0.61703	0.00240851	0.409336	1.38744	0.0283024	0.251016	0.111452	0.0312806	0.110159	0.360625
23358	USP24	0.246581	0.105874	2.32901	0.0198583	0.170463	1.72936	5.08799	0.405237	1.69775	-0.251641	-0.161174	2.77191	-0.34274	-0.26014	0.285073	-0.125945	-0.0525929	0.497775	-0.112699	-0.145546	0.0281946	0.250496	0.106479	0.0322484	0.108122	0.31303
23092	ARHGAP26	-0.293828	0.126247	-2.3274	0.0199442	0.171037	20.1429	6.26118	0.281628	-2.27187	0.682318	0.667411	-3.02624	-0.645103	-0.696805	-0.38301	0.343668	0.218387	-0.545068	-0.212541	-0.391912	0.0284217	0.253691	0.10707	0.0324411	0.108549	0.31634
55819	RNF130	-0.241971	0.104001	-2.32662	0.0199856	0.171186	0	4.23833	0.515638	-0.151242	-0.772574	-1.7519	-2.37759	-0.538106	0.141741	-0.025269	-0.389941	-0.58347	-0.425229	-0.17714	0.0792556	0.0279146	0.254752	0.110922	0.0319869	0.108367	0.312657
9375	TM9SF2	-0.373135	0.160395	-2.32636	0.0199996	0.171186	44.6902	9.03999	0.10748	-0.0844119	-1.50555	-0.151461	-3.4245	-2.15259	-0.703595	-0.0141029	-0.780941	-0.0494225	-0.620035	-0.729865	-0.395779	0.0279131	0.269058	0.106475	0.0327823	0.114964	0.316416
54916	TMEM260	-0.258838	0.111303	-2.32554	0.0200432	0.171396	6.89261	5.37014	0.372395	-1.95195	-1.02275	0.0842149	-0.896268	-0.46195	-2.36378	-0.328291	-0.519944	0.0274769	-0.158766	-0.151994	-1.42463	0.0282866	0.258448	0.106453	0.031379	0.108259	0.36324
3553	IL1B	-0.241611	0.103988	-2.32346	0.0201544	0.172043	0	4.32513	0.503616	-1.98933	-0.59608	-1.50614	-1.15532	1.05881	-0.828578	-0.334665	-0.299709	-0.498889	-0.204868	0.350481	-0.467216	0.0283013	0.252807	0.109717	0.0314445	0.109571	0.317957
84803	GPAT3	-0.241264	0.103841	-2.32341	0.0201571	0.172043	0	2.23354	0.815977	-1.53128	-0.451535	-0.927245	-0.469942	-1.84272	-0.779	-0.256878	-0.22649	-0.304244	-0.0831512	-0.619448	-0.438816	0.0281415	0.251603	0.107661	0.0313076	0.113003	0.317314
54863	TOR4A	-0.24147	0.103977	-2.32235	0.0202143	0.172367	0	4.19042	0.522338	-1.78677	-0.1229	-0.265416	-0.43238	-2.37108	-0.70474	-0.300183	-0.0614647	-0.0866335	-0.0765	-0.809572	-0.396431	0.0282253	0.250118	0.106541	0.0313034	0.116578	0.316429
10855	HPSE	-0.241158	0.103874	-2.32164	0.0202524	0.172457	0	3.4261	0.634598	-1.54127	0.0939628	-0.53434	-0.647587	-1.76724	-1.61361	-0.258569	0.0469879	-0.17466	-0.114628	-0.592963	-0.932909	0.0281445	0.250069	0.106844	0.0313319	0.112581	0.334258
5096	PCCB	0.241355	0.103968	2.32144	0.0202631	0.172457	0	3.8798	0.566848	2.62919	0.794073	0.187513	1.1447	-0.275562	-0.551619	0.444627	0.401007	0.0611912	0.202975	-0.090585	-0.309544	0.0285988	0.255025	0.106492	0.0314415	0.108063	0.314895
55968	NSFL1C	-0.241195	0.103957	-2.32014	0.0203335	0.172892	0	4.37445	0.496855	-1.25348	0.255625	0.686085	-2.18953	-0.881062	-1.44219	-0.209992	0.127943	0.224535	-0.390925	-0.290975	-0.828023	0.0280655	0.250512	0.107106	0.0318775	0.109069	0.329641
1453	CSNK1D	-0.269127	0.116028	-2.31949	0.0203686	0.173027	11.2006	5.63067	0.34383	-0.31243	-0.815149	-0.997735	-2.21357	-0.390206	-2.22902	-0.0522065	-0.411873	-0.327669	-0.3953	-0.128336	-1.3315	0.0279219	0.255301	0.107855	0.0318909	0.108171	0.356822
119710	C11orf74	-0.240883	0.103948	-2.31733	0.0204857	0.17352	0	3.66053	0.599248	-1.94975	-1.62069	-0.0443259	-1.38189	0.497066	-0.66614	-0.327917	-0.845799	-0.0144618	-0.245322	0.163584	-0.374466	0.0282858	0.272355	0.106445	0.0315156	0.108307	0.316006
10591	DNPH1	0.242261	0.104558	2.317	0.0205037	0.17352	0.505803	5.02542	0.412786	2.30304	-0.816573	1.57438	0.159298	0.945461	1.0378	0.388362	-0.412608	0.522238	0.0281753	0.312488	0.588122	0.0284361	0.25532	0.110031	0.0312836	0.109239	0.321147
41	ASIC1	0.240902	0.10395	2.31747	0.0204781	0.17352	0	3.58188	0.611036	2.32302	1.20523	0.477636	1.11802	-0.720431	0.326189	0.391796	0.616777	0.156066	0.198221	-0.23752	0.182588	0.0284454	0.261888	0.106763	0.031434	0.108697	0.313333
26261	FBXO24	0.240746	0.103881	2.31752	0.0204752	0.17352	0	2.54681	0.76943	1.05954	0.594494	0.0738568	2.50124	0.344119	-0.248232	0.177364	0.298902	0.024097	0.447883	0.113153	-0.138873	0.0280216	0.252792	0.10645	0.0320641	0.108123	0.312982
51559	NT5DC3	-0.275377	0.118937	-2.31532	0.0205956	0.174134	13.7834	5.79935	0.326236	-0.583106	-1.39877	-0.0656188	-3.03446	-0.0384582	-1.12188	-0.097477	-0.721801	-0.0214091	-0.546604	-0.0126361	-0.637257	0.0279454	0.266281	0.106449	0.0324476	0.107957	0.322652
5025	P2RX4	-0.240658	0.103987	-2.3143	0.0206513	0.174246	0	4.74335	0.447998	-1.78174	0.353244	-0.295123	-2.08948	-0.698674	1.36338	-0.299329	0.176967	-0.0963408	-0.372744	-0.2303	0.780503	0.0282235	0.250979	0.106565	0.0318233	0.108652	0.32773
57333	RCN3	-0.257998	0.111483	-2.31423	0.020655	0.174246	7.00972	5.37691	0.371632	-0.882878	0.560984	0.345967	-2.79055	-1.12226	-1.19239	-0.147703	0.281881	0.112963	-0.501227	-0.37183	-0.678739	0.0279881	0.252483	0.10661	0.0322619	0.109774	0.324017
171586	ABHD3	-0.240347	0.10392	-2.31282	0.0207327	0.174246	0	3.35512	0.645413	-0.602214	-1.12443	-1.51424	-2.01194	0.278326	-0.811757	-0.100675	-0.573663	-0.501654	-0.358685	0.0914946	-0.457571	0.0279476	0.260284	0.109754	0.0317831	0.108065	0.317734
148932	MOB3C	-0.319357	0.13809	-2.31267	0.0207406	0.174246	29.4298	7.08515	0.214385	-2.51635	-2.20126	-0.0278686	-0.212293	-1.46836	-1.23724	-0.425106	-1.1948	-0.00909232	-0.03755	-0.489445	-0.705267	0.0285399	0.294611	0.106444	0.0312861	0.111107	0.324935
10964	IFI44L	-0.3006	0.13002	-2.31195	0.0207807	0.174246	23.1836	6.50902	0.259788	-3.09064	-1.64282	-1.34116	-0.924386	0.0924078	0.82501	-0.525135	-0.858406	-0.442832	-0.163763	0.0303636	0.465169	0.0288699	0.273027	0.109023	0.0313853	0.107967	0.31791
253430	IPMK	-0.240143	0.103879	-2.31175	0.0207917	0.174246	0	2.60335	0.760856	-2.21677	0.0505281	-1.05924	-0.303792	-1.34194	-0.125694	-0.373557	0.0252651	-0.348162	-0.0537394	-0.446232	-0.0702792	0.0283969	0.25002	0.108038	0.0312918	0.110575	0.312623
10385	BTN2A2	-0.240206	0.103946	-2.31087	0.0208402	0.174246	0	3.59555	0.608982	-0.989259	-0.83483	-1.31172	-2.27097	0.374666	0.49173	-0.165557	-0.422036	-0.432883	-0.405759	0.123216	0.27572	0.0280076	0.255566	0.108908	0.0319237	0.108154	0.314401
26030	PLEKHG3	-0.239957	0.103844	-2.31075	0.0208468	0.174246	0	2.04856	0.842386	-1.63464	0.479564	-0.00710563	-1.98685	-0.732462	-0.0441693	-0.274375	0.240648	-0.00231825	-0.354142	-0.241515	-0.024692	0.0281738	0.25181	0.106443	0.0317705	0.108722	0.312515
22915	MMRN1	-0.318913	0.138048	-2.31015	0.0208796	0.174246	29.4867	7.09086	0.21397	-2.51748	0.238803	0.943474	-1.8219	-2.10227	-1.51992	-0.4253	0.119508	0.309632	-0.324337	-0.711735	-0.875313	0.0285404	0.250446	0.107704	0.0316915	0.11462	0.331654
10333	TLR6	-0.277412	0.120084	-2.31015	0.02088	0.174246	14.6891	5.86091	0.319989	-1.83931	1.24129	0.161211	-2.35398	-1.79237	-0.231455	-0.309115	0.636149	0.0526049	-0.420912	-0.601765	-0.129474	0.0282442	0.262646	0.106479	0.0319726	0.112719	0.312919
219743	TYSND1	0.411767	0.178206	2.31062	0.0208537	0.174246	53.8187	10.8269	0.0549221	1.50768	0.627536	3.35215	0.373126	2.4177	-0.0794006	0.252888	0.315716	1.18474	0.0660101	0.8268	-0.0443898	0.0281344	0.253115	0.124911	0.0312976	0.116949	0.312549
85457	CIPC	0.239908	0.103796	2.31134	0.0208141	0.174246	0	1.36752	0.927833	2.13868	0.94897	0.326411	0.765422	0.731581	0.0875716	0.360182	0.481306	0.106568	0.13553	0.241222	0.0489587	0.0283628	0.257239	0.106592	0.0313523	0.10872	0.31256
55907	CMAS	0.341246	0.147585	2.31221	0.0207663	0.174246	36.347	7.85509	0.164405	2.05666	-0.769652	2.34816	3.32079	-0.119393	-0.260079	0.346157	-0.388438	0.795499	0.6004	-0.0392318	-0.145512	0.0283284	0.254715	0.114769	0.0326887	0.107975	0.313029
79175	ZNF343	0.262442	0.113439	2.31351	0.0206943	0.174246	8.81976	5.48364	0.359743	2.54703	-1.0928	0.808453	0.96564	0.34131	1.65277	0.430407	-0.556892	0.264904	0.171098	0.112228	0.957191	0.0285556	0.259692	0.107366	0.0313949	0.10812	0.335405
26958	COPG2	-0.239637	0.103769	-2.30933	0.0209254	0.174377	0	1.07551	0.956248	-1.19248	-0.147331	-0.966496	-1.14489	-1.61287	-0.34433	-0.199722	-0.0736905	-0.31728	-0.203009	-0.53924	-0.192772	0.0280509	0.25017	0.107767	0.0314415	0.111781	0.313429
3904	LAIR2	-0.239911	0.103903	-2.30899	0.020944	0.174377	0	3.54807	0.616127	-1.32802	-1.03561	-1.30308	-1.44078	0.702457	-1.3327	-0.222554	-0.526706	-0.429967	-0.255861	0.231555	-0.762113	0.0280844	0.258669	0.108875	0.0315363	0.10866	0.32702
5547	PRCP	-0.239986	0.103943	-2.30881	0.0209539	0.174377	0	3.47855	0.626636	-0.945083	0.548999	-0.0877356	-2.57754	-0.981202	-0.0209427	-0.15814	0.275801	-0.0286257	-0.461904	-0.32445	-0.0117074	0.0279992	0.252377	0.106453	0.032114	0.10934	0.312503
22900	CARD8	-0.239965	0.103961	-2.30822	0.0209868	0.174489	0	4.48829	0.481451	-0.98533	-1.28055	0.496644	-2.18174	-0.183958	-1.4714	-0.164897	-0.657338	0.162296	-0.389507	-0.0604557	-0.845746	0.0280068	0.263503	0.106789	0.0318732	0.108003	0.330382
3073	HEXA	-0.239819	0.103939	-2.30731	0.0210378	0.174752	0	3.53806	0.617637	-1.32203	0.858418	-1.25276	-2.10475	0.204631	-0.579497	-0.221545	0.434238	-0.413005	-0.375517	0.0672531	-0.325317	0.0280828	0.255893	0.108687	0.0318314	0.108014	0.315146
29109	FHOD1	-0.239394	0.103801	-2.30626	0.0210958	0.17503	0	1.71705	0.886745	-1.19089	-0.417447	-1.76363	-0.780078	-1.05526	-0.781623	-0.199454	-0.209294	-0.587542	-0.138131	-0.34929	-0.440316	0.0280505	0.251369	0.110985	0.0313551	0.10956	0.317347
51056	LAP3	-0.26546	0.115134	-2.30566	0.0211297	0.17503	10.2255	5.56951	0.350384	-1.48841	-1.68476	-1.03418	-0.90618	-1.87336	1.14512	-0.24963	-0.882423	-0.339807	-0.160528	-0.630242	0.650898	0.0281288	0.274333	0.107962	0.0313812	0.113181	0.323092
64776	C11orf1	0.239636	0.103922	2.30593	0.0211145	0.17503	0	3.78089	0.581374	0.543755	0.331697	-0.239721	2.39655	1.1126	1.28596	0.0908918	0.166134	-0.0782398	0.428698	0.368576	0.734213	0.0279411	0.250863	0.106523	0.0319984	0.109742	0.325977
79623	GALNT14	-0.295049	0.128033	-2.30447	0.0211964	0.175109	21.4738	6.3673	0.272101	-1.66698	-1.10751	0.961884	-1.50226	-1.94335	-1.71579	-0.279856	-0.564683	0.315748	-0.266874	-0.654996	-0.996528	0.0281843	0.259965	0.107754	0.0315588	0.1136	0.337327
81671	VMP1	-0.23953	0.103943	-2.30445	0.0211976	0.175109	0	3.5148	0.62115	-1.3931	-0.0680905	-1.48833	-2.01196	0.76989	-0.155215	-0.233533	-0.0340477	-0.49281	-0.358688	0.25395	-0.0867941	0.0281018	0.250036	0.109638	0.0317831	0.108803	0.312688
90135	BTBD6	0.239223	0.103801	2.30462	0.0211877	0.175109	0	1.90484	0.86215	1.23358	-0.187702	1.33344	1.63113	0.0178009	1.10464	0.206641	-0.0939025	0.440221	0.289997	0.00584876	0.627153	0.0280607	0.250276	0.108993	0.0316091	0.107955	0.322333
762	CA4	-0.339917	0.147533	-2.304	0.0212225	0.175154	36.2552	7.84378	0.165058	-2.68688	0.83104	0.331378	-1.63548	-2.60771	-1.33954	-0.454632	0.420078	0.108192	-0.290779	-0.897913	-0.766206	0.0286301	0.255515	0.106597	0.0316108	0.118563	0.327177
139341	FUNDC1	-0.283729	0.123222	-2.30258	0.0213025	0.175653	17.435	6.05584	0.300824	-2.55908	-1.04511	0.623099	-0.775555	-2.2245	-0.0516233	-0.432491	-0.531711	0.203811	-0.137328	-0.755914	-0.0288592	0.0285619	0.258835	0.106989	0.0313542	0.115473	0.312521
3034	HAL	-0.239396	0.104005	-2.30177	0.0213479	0.175866	0	4.5405	0.474483	-0.829509	-0.626678	-0.428896	-2.77083	0.664335	-0.674584	-0.138752	-0.31528	-0.140099	-0.497576	0.218913	-0.379267	0.0279792	0.253106	0.106701	0.0322477	0.108585	0.316096
55911	APOBR	-0.338941	0.147282	-2.30131	0.0213739	0.175919	36.111	7.82607	0.166085	-2.51927	0.651893	-0.0929988	-2.894	-2.39749	0.866755	-0.42561	0.328132	-0.0303431	-0.520425	-0.819324	0.489146	0.0285414	0.253365	0.106455	0.0323385	0.116787	0.318482
23446	SLC44A1	-0.238638	0.103744	-2.30027	0.021433	0.176239	0	0.703421	0.98278	-1.35522	-1.17596	-0.729801	-1.0495	-1.0248	-0.301456	-0.227143	-0.601113	-0.23894	-0.186018	-0.339062	-0.168711	0.0280915	0.261292	0.107194	0.0314157	0.109467	0.313212
3937	LCP2	-0.238608	0.103776	-2.29925	0.0214908	0.176239	0	1.18216	0.946578	-1.06271	-0.316041	-0.801936	-2.10161	-0.066334	-0.418576	-0.177895	-0.158268	-0.26275	-0.374946	-0.0217956	-0.234505	0.0280223	0.250783	0.107351	0.0318297	0.107961	0.313875
338440	ANO9	0.238919	0.103912	2.29924	0.0214912	0.176239	0	3.12446	0.680804	2.19675	0.523506	1.16621	0.0419553	1.39559	0.0412987	0.370126	0.262881	0.383933	0.00742037	0.464533	0.0230872	0.0283881	0.25216	0.108382	0.0312808	0.110794	0.312513
83636	C19orf12	0.239089	0.103962	2.29977	0.0214613	0.176239	0	4.7915	0.441852	1.78436	0.810872	0.121463	1.64266	-0.857706	1.6704	0.299775	0.409666	0.0396318	0.292069	-0.283186	0.968161	0.0282244	0.255245	0.106463	0.0316138	0.10901	0.335933
55623	THUMPD1	0.2651	0.115372	2.29779	0.0215736	0.176754	10.5642	5.5906	0.348113	0.378726	-0.536564	1.62406	2.91472	0.338323	0.62138	0.0632895	-0.269497	0.5393	0.52428	0.111245	0.349051	0.0279263	0.25227	0.110269	0.0323543	0.108117	0.315546
9770	RASSF2	-0.238638	0.103871	-2.29743	0.021594	0.17676	0	3.07754	0.688032	-0.739525	0.638094	-1.08163	-1.64424	-1.42524	-1.22349	-0.12367	0.321096	-0.355634	-0.292354	-0.47467	-0.697119	0.0279655	0.253222	0.108107	0.0316144	0.110919	0.324649
58191	CXCL16	-0.314554	0.137018	-2.2957	0.0216928	0.177329	28.7061	7.01322	0.219659	-0.382365	-0.41027	-0.0710296	-2.22778	-2.57111	-1.5705	-0.0638979	-0.205677	-0.0231746	-0.397888	-0.884099	-0.906324	0.0279266	0.251322	0.10645	0.031899	0.118239	0.333036
221178	SPATA13	-0.238449	0.103897	-2.29506	0.0217298	0.177329	0	3.65263	0.600428	-1.0021	-1.42976	-1.39252	-0.492553	-1.27287	-1.43861	-0.167713	-0.738868	-0.460226	-0.0871558	-0.42275	-0.825857	0.0280101	0.26706	0.10923	0.0313102	0.110306	0.329551
85027	SMIM3	-0.238499	0.103957	-2.29421	0.0217786	0.177329	0	4.30707	0.506104	-1.78854	-0.249596	0.354319	-2.06387	0.58261	-1.25887	-0.300486	-0.12492	0.115694	-0.368097	0.191854	-0.718096	0.0282259	0.250488	0.106619	0.0318098	0.108439	0.325392
78992	YIPF2	0.263403	0.114815	2.29415	0.0217818	0.177329	10.0556	5.55899	0.351521	2.91056	1.08564	1.29529	0.708387	-0.685346	-0.111964	0.49358	0.5531	0.427338	0.12541	-0.225879	-0.0625994	0.0287583	0.25956	0.108845	0.031342	0.108626	0.312598
4090	SMAD5	0.255686	0.111424	2.29472	0.0217494	0.177329	6.86559	5.36858	0.372571	1.03372	-0.897878	2.2078	1.90676	0.914559	-0.445685	0.173026	-0.454704	0.744579	0.339657	0.302159	-0.249766	0.0280163	0.256461	0.113737	0.0317312	0.109156	0.31406
57194	ATP10A	0.23825	0.103797	2.29534	0.0217138	0.177329	0	2.08876	0.836733	1.05003	0.354071	0.973131	1.83089	-0.152437	1.34425	0.175766	0.177383	0.319486	0.325958	-0.0500931	0.769032	0.0280197	0.250983	0.107786	0.0316956	0.107988	0.327285
9363	RAB33A	-0.347035	0.151437	-2.29162	0.0219277	0.178356	38.6855	8.15468	0.147914	-0.450336	-2.33986	-0.766903	-2.17729	-2.27102	0.428875	-0.0752641	-1.28501	-0.25118	-0.388699	-0.772863	0.240301	0.0279321	0.301602	0.107273	0.0318707	0.115814	0.313944
317649	EIF4E3	-0.238141	0.103953	-2.29085	0.0219718	0.178553	0	3.83142	0.573934	-1.6955	0.576277	-0.943452	-0.602556	-2.12929	-0.292518	-0.284691	0.289646	-0.309625	-0.106646	-0.72146	-0.163698	0.0281938	0.252622	0.107704	0.031325	0.114803	0.31317
84807	NFKBID	-0.302609	0.132186	-2.28928	0.0220634	0.178875	24.7901	6.64806	0.248157	-0.813601	1.27687	-2.01664	-2.3527	-1.6105	-0.508803	-0.136085	0.655346	-0.676283	-0.420679	-0.538421	-0.285355	0.0279767	0.263421	0.11246	0.0319718	0.111769	0.314536
1843	DUSP1	-0.298307	0.130314	-2.28915	0.0220707	0.178875	23.3864	6.52626	0.258323	-1.51857	0.400647	-2.14084	-2.16622	0.635626	-1.64395	-0.254729	0.200828	-0.720526	-0.386685	0.209401	-0.951707	0.0281377	0.25126	0.113274	0.0318646	0.108532	0.335144
9534	ZNF254	-0.237728	0.103869	-2.28874	0.0220943	0.178875	0	2.51145	0.77477	-1.67829	-0.754119	-0.947478	-1.74729	0.6263	0.146437	-0.281773	-0.380455	-0.310962	-0.310891	0.206313	0.0818826	0.0281881	0.254523	0.107715	0.0316581	0.108515	0.312668
199675	MCEMP1	-0.237803	0.103923	-2.28827	0.0221219	0.178875	0	4.17917	0.523919	-2.30259	-0.11067	0.573447	-0.898238	-0.689751	-1.57789	-0.388285	-0.0553455	0.187496	-0.159116	-0.22734	-0.910869	0.0284359	0.250096	0.106905	0.0313794	0.108635	0.333242
79666	PLEKHF2	-0.237889	0.103962	-2.28823	0.0221239	0.178875	0	3.83964	0.572727	-2.43861	-0.881542	0.155848	-1.40817	0.581858	-0.0768527	-0.411692	-0.446222	0.0508542	-0.250024	0.191605	-0.0429651	0.0285009	0.256222	0.106477	0.0315247	0.108438	0.312546
83937	RASSF4	-0.237589	0.103847	-2.28788	0.0221443	0.178875	0	2.20707	0.819814	-0.819188	-0.815609	-1.84685	-1.62236	-0.23669	-0.079146	-0.137021	-0.41211	-0.61654	-0.288421	-0.0777966	-0.0442474	0.0279776	0.255307	0.111444	0.0316055	0.108034	0.312549
63977	PRDM15	0.237714	0.103906	2.28777	0.0221506	0.178875	0	3.03974	0.693859	2.31979	1.3279	-0.154296	1.03413	0.162054	-0.0971603	0.391239	0.683034	-0.0503479	0.183283	0.0532545	-0.0543207	0.0284439	0.264579	0.106476	0.0314118	0.107992	0.312574
57492	ARID1B	0.246779	0.107901	2.28708	0.0221909	0.17904	3.66119	5.19002	0.393133	2.53737	1.36293	-0.683686	1.15084	-0.195335	0.915936	0.428739	0.702147	-0.223745	0.20407	-0.0641961	0.517479	0.0285506	0.265407	0.107101	0.0314432	0.108009	0.319195
55313	CPPED1	-0.23771	0.103969	-2.28635	0.0222336	0.179223	0	4.18639	0.522904	-1.69367	-0.41912	0.642677	-2.17313	-0.758343	0.811785	-0.284382	-0.210137	0.210249	-0.387941	-0.250113	0.457587	0.0281932	0.25138	0.107024	0.0318684	0.108778	0.317735
10939	AFG3L2	0.237068	0.103713	2.28582	0.022265	0.179316	0	0.679957	0.984051	1.60856	0.258732	0.633857	1.26973	0.317215	1.06579	0.269957	0.129501	0.207348	0.225278	0.104295	0.604441	0.0281654	0.250524	0.107008	0.0314788	0.108098	0.321634
10455	ECI2	0.237683	0.104016	2.28507	0.022309	0.179509	0	4.8214	0.438064	1.74946	1.22546	-0.53542	2.0434	-0.662975	0.760831	0.293847	0.627635	-0.175014	0.364386	-0.218463	0.428429	0.0282122	0.26231	0.106846	0.0317992	0.108583	0.317089
5987	TRIM27	-0.237119	0.10385	-2.28328	0.0224141	0.180067	0	2.47428	0.780363	-1.11566	-0.0185803	0.395966	-2.00025	-1.32948	-0.719222	-0.186798	-0.0092902	0.12932	-0.356567	-0.441991	-0.404683	0.0280335	0.250003	0.106663	0.0317772	0.110525	0.316594
25805	BAMBI	-0.236745	0.103708	-2.2828	0.0224419	0.180067	0	0.282712	0.997956	-1.76838	-0.451225	-0.37029	-1.22896	-0.591871	-0.406663	-0.29706	-0.226334	-0.120918	-0.218001	-0.194917	-0.227803	0.0282188	0.251601	0.106635	0.0314662	0.108454	0.313797
55654	TMEM127	-0.236973	0.10382	-2.28254	0.0224577	0.180067	0	1.83526	0.871438	-1.84188	-0.562982	0.422029	-1.63636	-0.690498	0.0563908	-0.309552	-0.282895	0.137851	-0.290938	-0.227588	0.0315247	0.0282451	0.252501	0.106693	0.0316112	0.108636	0.312525
5150	PDE7A	0.237089	0.103887	2.28219	0.0224783	0.180067	0	2.78664	0.732839	1.39057	0.0641436	-0.509163	2.28533	0.758419	0.00781827	0.233106	0.0320739	-0.166401	0.408377	0.250138	0.00437055	0.0281011	0.250032	0.106807	0.031932	0.108778	0.3125
25992	SNED1	0.237163	0.103915	2.28228	0.022473	0.180067	0	3.91932	0.56109	1.16953	-1.08683	0.421353	1.77193	1.12897	1.4097	0.19586	-0.553728	0.13763	0.315328	0.374091	0.808383	0.0280456	0.259582	0.106692	0.031669	0.109796	0.328837
25801	GCA	-0.280238	0.122836	-2.28141	0.0225245	0.180276	17.2627	6.04323	0.302035	-2.96157	0.31205	0.806821	-1.53582	-0.742233	-1.40129	-0.502501	0.156263	0.264364	-0.27289	-0.24476	-0.803312	0.0287891	0.250763	0.107362	0.0315714	0.108743	0.328633
8872	CDC123	-0.236607	0.103763	-2.28027	0.0225916	0.180653	0	1.7048	0.888294	-1.48405	-0.339967	0.0330422	-1.57979	-0.408059	-1.38676	-0.248894	-0.170291	0.0107803	-0.280779	-0.134221	-0.794557	0.0281275	0.250906	0.106444	0.0315885	0.108192	0.328283
56978	PRDM8	-0.236783	0.103863	-2.27977	0.0226213	0.18073	0	2.78241	0.733488	-1.97734	0.0441838	0.561159	-1.64897	-0.33901	-0.958641	-0.33262	0.0220926	0.183462	-0.293204	-0.111471	-0.542161	0.0282965	0.250015	0.106885	0.0316164	0.108118	0.319848
56886	UGGT1	-0.23678	0.103919	-2.2785	0.0226969	0.181172	0	4.20517	0.520271	-1.33658	0.958328	-0.0471474	-1.73586	-1.04459	-1.60789	-0.223998	0.486192	-0.0153823	-0.308832	-0.345706	-0.929371	0.0280866	0.257387	0.106446	0.0316531	0.109527	0.334093
9019	MPZL1	-0.236913	0.10401	-2.2778	0.0227387	0.181345	0	4.5668	0.470996	-2.10107	-0.855483	1.09017	-1.83031	-0.264218	0.0223765	-0.353748	-0.432718	0.358486	-0.325853	-0.0868525	0.0125089	0.0283469	0.255851	0.108134	0.0316953	0.108054	0.312504
201799	TMEM154	-0.278927	0.122499	-2.27697	0.022788	0.181437	16.9219	6.01844	0.304429	-2.3499	-0.40607	1.26679	-2.57914	-0.764939	-0.253191	-0.396416	-0.20356	0.417729	-0.4622	-0.252305	-0.141651	0.028458	0.251295	0.108739	0.032115	0.108792	0.313002
23175	LPIN1	0.236198	0.103735	2.27693	0.0227905	0.181437	0	0.63962	0.986117	1.32789	0.116008	0.473472	1.85356	0.621873	0.0263383	0.222533	0.0580164	0.154701	0.330048	0.204847	0.0147237	0.0280843	0.250105	0.106757	0.0317061	0.108507	0.312505
6670	SP3	-0.236422	0.103884	-2.27582	0.022857	0.181805	0	2.98386	0.702474	-1.54613	0.419331	-0.669853	-2.08032	0.500954	-0.754631	-0.259391	0.210244	-0.219191	-0.371081	0.164868	-0.424887	0.028146	0.251381	0.107075	0.0318184	0.108312	0.317013
9556	ATP5MPL	-0.252525	0.111121	-2.27253	0.0230544	0.182853	6.64779	5.35606	0.373988	-1.55802	-0.952196	-2.01796	-0.879691	0.633667	-1.57314	-0.261403	-0.48299	-0.676752	-0.155821	0.208753	-0.907948	0.0281496	0.25729	0.112469	0.0313754	0.108528	0.333109
54858	PGPEP1	-0.235738	0.103741	-2.27236	0.0230646	0.182853	0	0.77708	0.978472	-0.863263	-0.339891	-0.839277	-1.75164	-1.13599	-0.129892	-0.144412	-0.170253	-0.275097	-0.311673	-0.376456	-0.0726271	0.0279848	0.250906	0.107438	0.03166	0.109819	0.312632
8658	TNKS	0.259429	0.114172	2.27227	0.02307	0.182853	9.49253	5.52441	0.355277	1.56645	-0.130905	0.955389	2.30111	0.930012	-1.63524	0.262829	-0.06547	0.31359	0.411257	0.307322	-0.946306	0.0281522	0.250134	0.107737	0.0319412	0.109197	0.334887
25814	ATXN10	0.488963	0.215174	2.2724	0.0230621	0.182853	67.8183	15.5368	0.00829889	5.11456	1.32339	-1.74876	3.43354	1.69053	1.21216	0.896157	0.680584	-0.582381	0.621752	0.566196	0.69042	0.0307009	0.264475	0.110905	0.0327906	0.112173	0.324417
7094	TLN1	-0.306169	0.134798	-2.27132	0.0231277	0.183149	26.8635	6.83653	0.233084	-1.73072	-0.321679	0.567395	-1.65449	-2.98561	-0.382723	-0.290667	-0.1611	0.185509	-0.294196	-1.0441	-0.214341	0.0282057	0.250811	0.106895	0.0316186	0.122299	0.313649
2533	FYB1	-0.235512	0.103793	-2.26905	0.0232652	0.183418	0	1.67429	0.892122	-2.00314	-0.147754	-0.761507	-1.10543	-0.746838	0.654883	-0.33702	-0.0739023	-0.249399	-0.195978	-0.24629	0.368069	0.0283068	0.250171	0.107261	0.0314306	0.108753	0.315887
4668	NAGA	-0.261357	0.115195	-2.26882	0.0232794	0.183418	10.3422	5.57676	0.349602	-0.758907	-0.378101	0.167572	-2.26536	-2.41716	0.305025	-0.126918	-0.189474	0.0546813	-0.404736	-0.826603	0.170713	0.0279683	0.251122	0.106482	0.0319204	0.116945	0.313229
115362	GBP5	-0.235899	0.103977	-2.26878	0.023282	0.183418	0	4.2927	0.508089	-2.40959	-1.11952	0.548578	-1.0176	-0.798437	0.637688	-0.40669	-0.571055	0.179332	-0.180341	-0.263445	0.358305	0.0284867	0.260191	0.106866	0.0314076	0.108868	0.31571
5660	PSAP	-0.235935	0.103994	-2.26874	0.0232841	0.183418	0	4.53552	0.475145	-0.952773	0.457489	-0.450386	-1.68784	-2.3205	0.359519	-0.159431	0.229496	-0.147137	-0.300191	-0.790971	0.201303	0.0280006	0.251646	0.106727	0.0316326	0.116187	0.313513
162417	NAGS	0.235706	0.10385	2.26967	0.0232278	0.183418	0	3.64455	0.601637	1.30434	-0.529646	0.676406	1.61305	0.232273	1.92372	0.218563	-0.265991	0.221348	0.286749	0.0763438	1.12888	0.0280783	0.252211	0.107087	0.0316017	0.108031	0.344359
23399	CTDNEP1	0.482812	0.21272	2.2697	0.0232256	0.183418	67.2169	15.2518	0.00933907	5.34061	-0.0386357	0.45308	2.63101	-0.269522	2.7772	0.940017	-0.0193183	0.14802	0.471749	-0.0885978	1.72802	0.0309806	0.250012	0.106731	0.0321499	0.108058	0.387151
29761	USP25	-0.235483	0.103873	-2.26703	0.0233881	0.184077	0	2.99542	0.700692	-1.30057	-1.06497	-0.705379	-1.94708	-0.208956	0.988365	-0.217928	-0.542182	-0.230891	-0.346945	-0.0686752	0.559386	0.0280773	0.259186	0.107144	0.0317507	0.108017	0.320323
79902	NUP85	-0.235086	0.103796	-2.26489	0.0235193	0.184859	0	1.75549	0.881837	-0.814825	-0.612821	-1.78274	-1.43449	-0.349237	-0.698475	-0.13629	-0.308225	-0.594184	-0.254733	-0.114839	-0.392863	0.0279769	0.252969	0.111088	0.031534	0.108128	0.316359
5886	RAD23A	0.244289	0.107866	2.26474	0.0235286	0.184859	3.62785	5.18822	0.393344	2.18716	0.733921	-0.310812	2.1967	-0.855068	-0.0466749	0.368482	0.370089	-0.101468	0.39223	-0.282306	-0.0260928	0.0283838	0.25428	0.106578	0.0318815	0.109003	0.312517
3148	HMGB2	-0.235261	0.103951	-2.2632	0.0236234	0.185442	0	3.97853	0.552511	-1.99587	-1.32298	-1.68259	-0.215063	0.0590517	-0.697117	-0.33578	-0.680359	-0.559475	-0.0380401	0.0194027	-0.392089	0.0283039	0.264465	0.110561	0.0312862	0.107959	0.316343
5714	PSMD8	0.258023	0.114045	2.26247	0.0236681	0.185631	9.42115	5.52005	0.355752	3.16382	0.337489	1.24424	0.0973859	0.389318	-0.285525	0.538012	0.169046	0.410138	0.0172243	0.128044	-0.159776	0.0289174	0.250893	0.108656	0.0312817	0.10817	0.313138
867	CBL	-0.234875	0.103904	-2.2605	0.0237902	0.186273	0	3.50714	0.622308	-2.14175	0.897536	-0.898362	-0.546724	-1.07675	-0.979265	-0.360707	0.454526	-0.294664	-0.0967518	-0.356512	-0.554108	0.0283642	0.256456	0.107585	0.0313171	0.109627	0.320176
1742	DLG4	0.235003	0.103961	2.26048	0.0237914	0.186273	0	4.22875	0.516973	0.778212	0.956096	0.566677	2.49889	-0.678801	0.890187	0.130153	0.485026	0.185273	0.447453	-0.223709	0.502633	0.0279712	0.257352	0.106894	0.0320626	0.108613	0.318816
84286	TMEM175	-0.234208	0.103745	-2.25753	0.0239752	0.187028	0	0.870616	0.972312	-1.17666	-0.4733	-1.10781	-1.7632	-0.142633	-0.0449303	-0.197059	-0.237483	-0.364383	-0.313757	-0.0468705	-0.0251174	0.0280472	0.251762	0.10819	0.0316651	0.107983	0.312516
81565	NDEL1	-0.336894	0.149246	-2.2573	0.0239894	0.187028	37.5743	8.00952	0.155712	-1.95503	-1.00578	-0.78538	0.191727	-2.21061	-2.10007	-0.328816	-0.511033	-0.257281	0.0339119	-0.750869	-1.24459	0.0282878	0.258161	0.107314	0.031285	0.115373	0.351225
8698	S1PR4	-0.2552	0.11306	-2.25721	0.0239948	0.187028	8.47954	5.46326	0.361991	-1.88149	-0.431389	0.902055	-2.75608	-0.0672643	0.0291768	-0.316291	-0.216325	0.295888	-0.494845	-0.0221013	0.0163105	0.0282597	0.251462	0.107595	0.0322371	0.107961	0.312507
375757	SWI5	-0.234284	0.103807	-2.25693	0.0240126	0.187028	0	1.92236	0.859781	-1.12671	-1.54117	-0.0226967	-1.35598	-1.04571	-0.662343	-0.188655	-0.800879	-0.00740495	-0.240689	-0.346083	-0.372308	0.028036	0.270044	0.106443	0.0315068	0.109531	0.315965
114823	LENG8	0.234296	0.103779	2.25763	0.0239687	0.187028	0	1.4121	0.922985	1.75611	0.397582	-0.0513732	1.60075	0.757633	-0.357733	0.294977	0.199284	-0.0167611	0.284541	0.249877	-0.2003	0.0282145	0.251241	0.106446	0.0315968	0.108776	0.313503
54980	C2orf42	0.234758	0.103951	2.25835	0.0239239	0.187028	0	3.8227	0.575215	1.61834	1.41197	0.596565	1.79042	-0.864067	0.0453442	0.271614	0.729059	0.19509	0.318661	-0.285306	0.0253488	0.0281685	0.26661	0.106943	0.0316772	0.109026	0.312516
114876	OSBPL1A	-0.344282	0.15265	-2.25537	0.0241098	0.187623	39.9021	8.31976	0.139471	-0.537706	-1.81612	-1.22312	-3.71161	-0.0747189	-0.0108408	-0.0898796	-0.958815	-0.403037	-0.674857	-0.0245509	-0.00606018	0.0279404	0.278729	0.10858	0.0330596	0.107962	0.312501
2356	FPGS	0.234102	0.103843	2.25438	0.0241724	0.187947	0	2.48048	0.779432	2.41877	0.0150291	0.828914	0.264019	0.69287	0.689324	0.408272	0.0075146	0.271669	0.0467015	0.228375	0.387653	0.0284912	0.250002	0.107414	0.0312891	0.108641	0.316257
8013	NR4A3	-0.234127	0.103926	-2.25282	0.0242706	0.188548	0	4.30157	0.506863	-0.497409	-1.08989	-1.74156	-0.76975	-1.48628	-1.45153	-0.0831378	-0.555349	-0.579881	-0.136298	-0.495594	-0.833682	0.0279364	0.259638	0.110867	0.0313531	0.111186	0.329876
1871	E2F3	-0.233853	0.103841	-2.25202	0.0243213	0.188779	0	3.27135	0.65823	-1.79022	-0.585176	0.059275	-0.56452	-1.34106	-1.63553	-0.30077	-0.294166	0.0193392	-0.0999049	-0.445933	-0.946487	0.0282265	0.252704	0.106447	0.0313195	0.110571	0.334896
1512	CTSH	-0.233746	0.103855	-2.25069	0.0244054	0.18914	0	2.50815	0.775267	-0.564611	-0.161684	-0.497954	-2.32495	-1.24352	0.170672	-0.0943819	-0.080875	-0.162726	-0.415609	-0.412797	0.0954432	0.0279433	0.250204	0.106791	0.0319553	0.110197	0.312728
26092	TOR1AIP1	-0.233499	0.103757	-2.25044	0.0244208	0.18914	0	1.34441	0.930296	-1.12644	-0.855666	0.0351682	-1.41353	-1.30932	-0.833203	-0.188611	-0.432813	0.0114739	-0.250983	-0.435132	-0.46987	0.0280359	0.255854	0.106444	0.0315266	0.110446	0.318019
1084	CEACAM3	-0.25519	0.113404	-2.25027	0.0244315	0.18914	8.7986	5.48237	0.359883	-2.2114	-0.107496	1.10613	-2.42394	-0.21472	-0.40661	-0.372637	-0.0537576	0.363821	-0.433712	-0.0705706	-0.227773	0.0283945	0.25009	0.108184	0.0320153	0.10802	0.313797
79595	SAP130	-0.23347	0.103774	-2.2498	0.0244619	0.18914	0	1.36922	0.92765	-1.71687	-0.101113	-0.678786	-0.789715	-1.5446	-0.0522097	-0.288317	-0.0505647	-0.222132	-0.139842	-0.51566	-0.0291871	0.028201	0.25008	0.107092	0.0313569	0.111453	0.312521
51121	RPL26L1	-0.233535	0.103811	-2.24962	0.0244729	0.18914	0	1.87197	0.866562	-2.1033	-0.724139	-0.901775	-1.0432	0.148422	0.247014	-0.354129	-0.365073	-0.295796	-0.184897	0.0487733	0.138191	0.0283478	0.254165	0.107594	0.0314141	0.107986	0.312977
8321	FZD1	-0.233609	0.103899	-2.24841	0.02455	0.189573	0	3.79197	0.579739	-2.4611	-0.783685	-0.487875	-0.158418	-0.245256	-1.36121	-0.415569	-0.395658	-0.159422	-0.0280196	-0.0806143	-0.779199	0.028512	0.254892	0.106777	0.0312836	0.10804	0.327679
10561	IFI44	-0.285835	0.127163	-2.24778	0.0245902	0.189601	20.9469	6.32486	0.275879	-3.22039	-1.14383	-0.746091	-0.768821	-0.727717	1.19763	-0.547988	-0.583975	-0.244313	-0.136133	-0.239939	0.681833	0.0289551	0.260657	0.107228	0.0313529	0.108712	0.324122
81577	GFOD2	-0.47182	0.209913	-2.24769	0.0245958	0.189601	66.0692	14.7359	0.0115526	-2.93554	-0.836204	1.12305	-1.90482	-4.03321	-1.15645	-0.497947	-0.422746	0.36948	-0.339306	-1.49476	-0.657558	0.0287733	0.255585	0.108239	0.0317303	0.137353	0.32331
64407	RGS18	-0.233667	0.103989	-2.24705	0.0246371	0.189756	0	4.92811	0.424717	-2.56656	-0.280585	0.11463	-1.13866	0.759976	-1.19337	-0.433784	-0.140465	0.0374018	-0.201898	0.250655	-0.679319	0.0285658	0.250617	0.106461	0.0314398	0.108781	0.324037
81931	ZNF93	-0.233228	0.10389	-2.24495	0.0247714	0.190418	0	3.00467	0.699265	-1.50841	-1.16934	-0.323313	-1.96727	0.639591	-0.134299	-0.253012	-0.597575	-0.105555	-0.350598	0.210715	-0.0750922	0.0281347	0.261159	0.106589	0.0317607	0.108539	0.312641
3091	HIF1A	-0.233059	0.103856	-2.24406	0.0248288	0.190418	0	3.92709	0.55996	-0.857354	0.0647627	-1.55084	-1.35622	-0.310345	-1.9705	-0.143421	0.0323835	-0.51417	-0.240732	-0.102033	-1.15924	0.0279838	0.250033	0.109921	0.0315069	0.108092	0.346096
6647	SOD1	0.233293	0.103947	2.24433	0.024811	0.190418	0	3.89111	0.565197	1.68044	0.0836263	-0.828314	2.28027	0.129265	0.441415	0.282137	0.0418177	-0.27147	0.407455	0.0424767	0.247362	0.0281888	0.250055	0.107412	0.0319291	0.107978	0.31403
55342	STRBP	0.232803	0.103722	2.2445	0.0248004	0.190418	0	0.679297	0.984086	1.15563	1.15381	0.594709	1.19562	1.0332	0.446791	0.19352	0.589293	0.19448	0.212054	0.341883	0.250389	0.0280424	0.260852	0.10694	0.0314562	0.109492	0.314067
9700	ESPL1	0.233027	0.103806	2.24484	0.0247786	0.190418	0	2.02143	0.846172	2.10505	0.469453	1.22605	0.55638	-0.015807	0.772079	0.354428	0.235539	0.40402	0.0984627	-0.00519362	0.434858	0.0283486	0.251734	0.10859	0.0313184	0.107955	0.317228
85025	TMEM60	-0.233166	0.103982	-2.24237	0.0249374	0.191049	0	4.55199	0.472958	-2.08698	0.507395	0.360551	-1.99368	-0.492358	0.787469	-0.351339	0.254724	0.117732	-0.355378	-0.16203	0.443661	0.028341	0.252028	0.106625	0.0317739	0.1083	0.317421
158293	FAM120AOS	0.412795	0.184136	2.24179	0.0249749	0.191049	56.6398	11.5313	0.0418058	3.41983	-0.287711	-1.04349	3.64041	2.84034	0.337858	0.583317	-0.144042	-0.34291	0.661195	0.987094	0.189139	0.0290938	0.250648	0.10799	0.0329883	0.120775	0.313394
9379	NRXN2	0.358459	0.15988	2.24205	0.0249581	0.191049	44.4881	9.00708	0.108782	2.19832	0.664393	-1.14766	4.00678	1.02194	0.947351	0.370394	0.334512	-0.377717	0.731975	0.338106	0.535628	0.0283887	0.253497	0.10832	0.0333735	0.109459	0.319672
79898	ZNF613	-0.233113	0.104004	-2.24138	0.0250013	0.191089	0	4.77628	0.443788	-0.560752	-1.04526	-1.87293	-2.13044	0.12433	0.5753	-0.093736	-0.531789	-0.625662	-0.380182	0.0408547	0.322941	0.0279429	0.258837	0.111593	0.0318452	0.107977	0.315107
549	AUH	0.362074	0.161571	2.24095	0.025029	0.191138	45.4697	9.16921	0.102502	3.20338	0.273741	1.26284	3.93313	-0.891494	-0.307055	0.544986	0.137031	0.416401	0.717647	-0.294457	-0.171851	0.0289437	0.250587	0.108724	0.0332923	0.109095	0.313238
55916	NXT2	-0.232304	0.10374	-2.23928	0.0251374	0.191803	0	0.92696	0.968239	-1.691	-0.77342	-1.20069	-0.630297	-0.755992	-0.270641	-0.283929	-0.390376	-0.395499	-0.111563	-0.249331	-0.151432	0.0281923	0.254762	0.108501	0.0313292	0.108773	0.313073
26052	DNM3	-0.232309	0.103788	-2.23831	0.0252009	0.192019	0	2.19865	0.821031	-1.36022	-0.593167	-1.62266	-0.598356	-0.5683	-1.30101	-0.227986	-0.298228	-0.538816	-0.105901	-0.187121	-0.743179	0.0280929	0.252779	0.110263	0.0313244	0.108415	0.326308
7292	TNFSF4	-0.232412	0.103839	-2.2382	0.0252083	0.192019	0	2.64255	0.75489	-2.08912	-0.705998	0.587682	-1.00423	-0.718517	-0.958682	-0.351705	-0.355781	0.192172	-0.177963	-0.236885	-0.542185	0.0283419	0.253956	0.106928	0.0314043	0.108693	0.319849
7535	ZAP70	0.232056	0.103728	2.23715	0.0252763	0.192049	0	0.849485	0.97377	1.17581	1.22456	0.976267	1.21842	0.403749	0.609586	0.196916	0.62715	0.320529	0.216122	0.1328	0.342363	0.028047	0.262291	0.107794	0.031463	0.108187	0.31543
7434	VIPR2	0.232323	0.103839	2.23735	0.0252635	0.192049	0	2.30337	0.805772	1.6248	0.481754	-0.564543	1.97879	0.43502	0.116219	0.272707	0.241755	-0.184572	0.352682	0.14311	0.0649794	0.0281706	0.251826	0.106891	0.0317664	0.108224	0.312606
57124	CD248	0.376642	0.168331	2.23751	0.0252528	0.192049	49.4761	9.8963	0.0782274	4.82659	1.1198	-0.194997	1.23712	0.57029	0.633754	0.841113	0.571203	-0.0636347	0.219459	0.187779	0.356072	0.0303689	0.260196	0.106496	0.0314687	0.108419	0.31567
284021	MILR1	-0.232044	0.103806	-2.23536	0.0253935	0.192452	0	1.95001	0.856018	-0.644996	-0.826449	-1.7163	-1.1776	-1.15565	-0.424114	-0.107837	-0.417706	-0.571129	-0.208839	-0.383087	-0.237622	0.0279528	0.255452	0.110735	0.0314509	0.109886	0.313912
3783	KCNN4	0.232442	0.103971	2.23564	0.0253751	0.192452	0	4.50903	0.478676	1.21041	0.744719	0.947794	2.11037	-1.15831	0.890939	0.20274	0.375629	0.311067	0.376536	-0.383982	0.503067	0.0280551	0.254409	0.107716	0.0318344	0.109895	0.318827
84330	ZNF414	0.313212	0.140078	2.23599	0.0253526	0.192452	31.1055	7.25748	0.202185	0.89925	1.04137	0.709064	2.33832	-0.0722337	2.67981	0.150449	0.529737	0.232105	0.418052	-0.0237342	1.65386	0.027991	0.258769	0.107151	0.0319632	0.107962	0.380881
28951	TRIB2	0.231991	0.103827	2.2344	0.0254566	0.192767	0	2.15991	0.826605	0.958035	-0.225446	0.0851917	2.30032	0.923865	0.177622	0.160315	-0.112813	0.0277956	0.411113	0.305268	0.099333	0.0280016	0.250398	0.106453	0.0319408	0.109181	0.312747
29957	SLC25A24	-0.232237	0.103968	-2.23373	0.0255009	0.19294	0	4.46612	0.48443	-2.28603	-0.58904	1.05382	-0.902857	-1.11618	-0.843334	-0.38544	-0.29613	0.346355	-0.159937	-0.369781	-0.475686	0.0284282	0.25274	0.108021	0.0313805	0.109754	0.318157
84080	ENKD1	-0.303711	0.136061	-2.23218	0.0256034	0.193553	28.0123	6.94563	0.224715	-1.23444	-0.840477	0.698611	-2.01646	-1.48978	-2.37299	-0.206785	-0.424955	0.228661	-0.359505	-0.496795	-1.43109	0.0280609	0.255643	0.107131	0.0317854	0.111202	0.363701
4311	MME	-0.276833	0.1241	-2.23072	0.0256996	0.193954	18.3815	6.12606	0.294145	-2.7939	0.504191	-0.292336	-2.59988	0.614277	0.0227485	-0.473233	0.253103	-0.09543	-0.466015	0.202333	0.0127169	0.02869	0.252002	0.106562	0.0321289	0.108493	0.312504
133957	CCDC127	0.265303	0.118916	2.23102	0.0256798	0.193954	13.5896	5.78634	0.327567	1.72043	2.01404	1.95371	0.998354	-0.29772	-0.330051	0.288921	1.07764	0.654044	0.176917	-0.0978771	-0.184756	0.0282022	0.286291	0.112071	0.0314028	0.108081	0.313353
54107	POLE3	0.231511	0.103852	2.22923	0.0257987	0.194539	0	2.95627	0.706727	1.56036	1.68177	-0.131391	0.856978	0.863605	1.07944	0.261798	0.880704	-0.0428718	0.151786	0.285152	0.61241	0.0281504	0.274239	0.106467	0.0313705	0.109024	0.321876
203228	C9orf72	-0.23139	0.103836	-2.22843	0.0258521	0.194766	0	2.40188	0.791194	-0.745773	-1.36857	-1.70579	-1.28152	-0.358426	-0.508054	-0.124717	-0.705235	-0.567492	-0.227385	-0.117866	-0.284932	0.0279664	0.265542	0.11068	0.0314825	0.108137	0.31453
6039	RNASE6	-0.231402	0.103869	-2.22782	0.0258928	0.194766	0	2.98661	0.702051	-1.56301	-0.687003	-0.7511	-1.76688	0.906488	-0.726	-0.262247	-0.346063	-0.245965	-0.314418	0.299463	-0.408547	0.0281512	0.253742	0.107239	0.0316667	0.109135	0.316673
868	CBLB	0.270942	0.121619	2.2278	0.0258938	0.194766	16.2777	5.97213	0.308941	3.45335	0.417232	-0.565872	0.796787	0.745889	0.332648	0.589281	0.209186	-0.185009	0.141097	0.245974	0.186213	0.0291181	0.251367	0.106893	0.0313583	0.108751	0.313367
4778	NFE2	-0.422476	0.190328	-2.21972	0.0264378	0.19861	59.4932	12.3436	0.0303713	-4.0196	-0.874442	0.635527	-0.556835	-2.77775	-1.39147	-0.691224	-0.44254	0.207897	-0.0985432	-0.962855	-0.797394	0.0295714	0.25612	0.107011	0.0313185	0.120153	0.328396
6774	STAT3	-0.342412	0.154271	-2.21955	0.026449	0.19861	40.6732	8.4279	0.134177	-1.64114	0.748492	-0.469264	-1.22826	-2.91379	-1.91751	-0.275477	0.377566	-0.153322	-0.217877	-1.01578	-1.12486	0.0281759	0.254455	0.106752	0.031466	0.121531	0.344133
54536	EXOC6	-0.250614	0.112976	-2.21829	0.0265351	0.198925	8.41749	5.45956	0.362401	-2.10126	0.91693	-0.125896	-0.850594	-1.43739	-1.805	-0.35378	0.464609	-0.0410784	-0.150652	-0.47883	-1.05281	0.028347	0.256746	0.106465	0.0313692	0.110971	0.34021
64769	MEAF6	0.230203	0.103763	2.21854	0.0265181	0.198925	0	1.36606	0.927989	1.5826	0.353051	0.156847	1.84974	-0.135106	0.440824	0.265562	0.17687	0.0511804	0.329359	-0.0443962	0.247029	0.0281573	0.250978	0.106477	0.0317043	0.10798	0.314026
84959	UBASH3B	-0.274994	0.124019	-2.21735	0.0265993	0.19903	18.2297	6.11469	0.295218	-2.16621	-0.935313	-0.0587152	-0.0469648	-1.89655	-1.75636	-0.364893	-0.474183	-0.0191566	-0.00830638	-0.638431	-1.02204	0.0283747	0.257027	0.106447	0.0312808	0.113318	0.338614
55204	GOLPH3L	-0.307004	0.13847	-2.21711	0.0266155	0.19903	29.7611	7.11856	0.211971	-1.73055	-0.736138	-0.567559	-0.137186	-2.97982	-0.919159	-0.290638	-0.371226	-0.185563	-0.024264	-1.04181	-0.519339	0.0282057	0.254307	0.106896	0.0312828	0.122236	0.319243
3159	HMGA1	0.230193	0.103807	2.21751	0.0265884	0.19903	0	2.01519	0.847039	1.93418	0.688225	1.09601	1.04006	-0.491079	0.440122	0.325264	0.346688	0.360437	0.184338	-0.161608	0.246633	0.0282797	0.253756	0.108152	0.0314133	0.108298	0.314021
79041	TMEM38A	-0.312541	0.141017	-2.21634	0.0266685	0.19926	32.0457	7.35789	0.195355	-3.93386	0.13105	0.0434221	-2.14876	-0.467255	0.615462	-0.675632	0.0655424	0.0141669	-0.38351	-0.153744	0.345694	0.0294974	0.250134	0.106445	0.0318551	0.108266	0.315488
51719	CAB39	-0.263196	0.11883	-2.21491	0.0267665	0.199737	13.6721	5.79187	0.327001	-0.346235	0.0874782	-0.57304	-1.72541	-2.13226	-1.85643	-0.0578575	0.0437443	-0.187363	-0.306952	-0.722528	-1.0856	0.027924	0.25006	0.106904	0.0316486	0.114824	0.341963
158248	TTC16	0.230186	0.103963	2.21411	0.026821	0.199737	0	4.77261	0.444257	1.96557	0.843863	1.28821	0.383178	1.33776	-1.22615	0.330612	0.426706	0.424952	0.0677895	0.444807	-0.698694	0.0282919	0.25569	0.108819	0.0312985	0.110558	0.324704
51611	DPH5	0.229731	0.103754	2.21419	0.0268154	0.199737	0	1.3098	0.93392	1.2153	0.342602	-0.232137	1.87992	0.833984	0.578458	0.203563	0.171616	-0.0757628	0.334807	0.27528	0.324729	0.0280563	0.25092	0.106518	0.0317184	0.108952	0.315136
5393	EXOSC9	0.230125	0.103927	2.2143	0.0268082	0.199737	0	4.24038	0.515352	0.098439	-0.255785	0.868397	2.10794	1.54375	1.21971	0.0164465	-0.128023	0.284735	0.376094	0.515367	0.694885	0.0279133	0.250512	0.107509	0.0318331	0.111449	0.324572
23431	AP4E1	0.229626	0.103755	2.21316	0.0268866	0.200059	0	1.82962	0.872182	0.957257	0.159517	0.504035	1.21294	1.56527	1.26908	0.160184	0.0797901	0.16472	0.215143	0.522789	0.724166	0.0280015	0.250199	0.1068	0.0314614	0.111551	0.32561
54585	LZTFL1	0.306134	0.138375	2.21235	0.0269423	0.200308	29.9626	7.13905	0.210503	3.18712	0.738676	0.500593	2.71301	-0.9361	-0.372681	0.542118	0.372527	0.163591	0.486883	-0.309358	-0.208698	0.0289328	0.254337	0.106795	0.0322065	0.109214	0.313589
57584	ARHGAP21	-0.240998	0.108984	-2.21132	0.0270136	0.200507	4.63994	5.24329	0.386917	-0.634485	-0.213401	-2.76587	-0.983725	-0.830959	-0.754365	-0.106078	-0.106776	-0.951539	-0.174314	-0.274272	-0.424735	0.0279515	0.250356	0.118356	0.0313992	0.108944	0.31701
2287	FKBP3	0.287203	0.129864	2.21157	0.0269965	0.200507	23.003	6.49376	0.261092	2.11482	-1.51272	1.70974	2.10947	-0.0431531	1.04608	0.356099	-0.784946	0.56886	0.376372	-0.0141787	0.592942	0.0283527	0.269254	0.1107	0.0318339	0.107957	0.32129
2355	FOSL2	-0.229554	0.10385	-2.21044	0.0270745	0.200794	0	3.78103	0.581354	-0.712371	0.266953	-0.31366	-2.05255	-0.641596	-1.83449	-0.119121	0.133626	-0.102399	-0.366044	-0.211379	-1.07158	0.0279617	0.250558	0.106581	0.0318039	0.108542	0.341207
23587	ELP5	0.229607	0.103923	2.20938	0.0271479	0.201006	0	4.44241	0.487626	1.77195	1.31366	0.331958	0.0228826	1.4925	1.45603	0.297666	0.675289	0.108382	0.00404708	0.497731	0.836412	0.02822	0.26425	0.106597	0.0312806	0.111214	0.32999
51776	MAP3K20	0.323148	0.146261	2.20939	0.0271475	0.201006	35.6095	7.76512	0.169664	3.44847	1.53472	0.155417	2.46437	-0.210195	-0.949281	0.588412	0.79726	0.0507137	0.441119	-0.0690826	-0.536744	0.0291146	0.269863	0.106476	0.0320406	0.108017	0.319702
221443	OARD1	0.388	0.175817	2.20684	0.0273252	0.202152	52.9642	10.6302	0.0592255	-0.350412	0.300744	2.79456	1.59945	2.04372	1.5227	-0.0585559	0.150585	0.962533	0.284308	0.690744	0.877014	0.0279243	0.250709	0.118633	0.0315963	0.114233	0.331729
1053	CEBPE	-0.229024	0.103857	-2.20518	0.0274418	0.202806	0	2.84714	0.723538	-1.95075	-0.852275	0.140931	-1.66306	-0.0462453	0.624806	-0.328086	-0.431058	0.0459855	-0.295736	-0.0151948	0.350994	0.0282861	0.255807	0.10647	0.0316222	0.107958	0.31558
1869	E2F1	0.229114	0.10391	2.20494	0.0274586	0.202806	0	3.4953	0.624099	2.50767	0.734824	-0.524267	1.08111	-0.0312351	0.289838	0.423607	0.370552	-0.171355	0.191647	-0.0102628	0.162195	0.0285355	0.254291	0.106829	0.031424	0.107956	0.313158
54434	SSH1	-0.228883	0.103865	-2.20366	0.027548	0.203163	0	3.8973	0.564296	-1.26216	-0.730088	-1.50196	-1.09515	0.471898	-1.71739	-0.211454	-0.368123	-0.49746	-0.194148	0.155277	-0.997533	0.0280676	0.254235	0.109699	0.0314278	0.108272	0.337377
2181	ACSL3	-0.228587	0.103776	-2.2027	0.0276158	0.203163	0	2.14181	0.829195	-1.68399	-0.5191	-1.25253	-0.817792	0.160587	-1.27475	-0.28274	-0.26065	-0.41293	-0.144827	0.052772	-0.72754	0.02819	0.252123	0.108686	0.0313625	0.107991	0.325733
113540	CMTM1	-0.228745	0.103854	-2.20257	0.0276251	0.203163	0	4.48206	0.482287	-1.3711	0.0774038	0.0973786	-1.18474	-1.01085	-2.23887	-0.229821	0.0387055	0.0317723	-0.210114	-0.334386	-1.33822	0.0280958	0.250047	0.106456	0.031453	0.109426	0.357271
7803	PTP4A1	-0.228534	0.103778	-2.20214	0.0276556	0.203163	0	1.72963	0.885146	-2.0039	0.0161942	0.322332	-1.22871	-0.775972	-0.589418	-0.33715	0.00809715	0.105235	-0.217958	-0.255973	-0.330935	0.0283071	0.250002	0.106588	0.0314661	0.108817	0.315238
81605	URM1	0.290351	0.131857	2.202	0.0276651	0.203163	24.7245	6.64227	0.248633	2.18784	1.03182	1.95271	0.261094	-0.249037	1.87149	0.368598	0.524714	0.653693	0.046184	-0.0818581	1.09524	0.0283841	0.258604	0.112065	0.0312889	0.108043	0.342489
894	CCND2	0.229035	0.103979	2.2027	0.0276159	0.203163	0	4.495	0.480553	2.2852	0.25436	-1.11549	1.63429	0.288441	0.248314	0.385297	0.127309	-0.366951	0.290565	0.0948233	0.138919	0.0284279	0.250506	0.108214	0.0316103	0.108073	0.312982
4714	NDUFB8	0.22852	0.103711	2.20344	0.0275639	0.203163	0	0.944791	0.966895	1.08489	0.434927	1.13147	0.916021	1.22542	0.901566	0.181624	0.218109	0.372298	0.162276	0.406665	0.509191	0.0280269	0.251487	0.108266	0.0313834	0.110131	0.318982
338339	CLEC4D	-0.228655	0.103876	-2.20122	0.0277202	0.203402	0	3.67468	0.597136	-2.46477	0.0130221	0.156494	-0.701294	-0.247112	-1.36654	-0.416203	0.00651105	0.0510653	-0.124152	-0.0812248	-0.782401	0.0285139	0.250001	0.106477	0.0313408	0.108041	0.327804
84436	ZNF528	0.348664	0.158454	2.20041	0.027778	0.20366	43.1442	8.79418	0.117561	1.42127	-1.30976	2.26829	1.21746	2.53448	0.977066	0.238289	-0.673172	0.76644	0.21595	0.870333	0.552833	0.0281095	0.264161	0.114172	0.0314627	0.117921	0.320141
151306	GPBAR1	-0.247822	0.112654	-2.19986	0.0278167	0.203679	8.12651	5.44227	0.364318	-2.12092	-0.932993	-0.951561	-1.6546	0.0560485	1.58778	-0.357143	-0.472974	-0.312318	-0.294215	0.0184159	0.916965	0.0283553	0.256991	0.107726	0.0316187	0.107959	0.333521
26574	AATF	-0.228468	0.103862	-2.19973	0.0278259	0.203679	0	2.87783	0.718813	-1.32458	0.649107	0.0210491	-1.61769	-1.68763	-0.274501	-0.221975	0.326711	0.0068674	-0.287583	-0.565185	-0.153596	0.0280835	0.253336	0.106443	0.0316036	0.112158	0.31309
6655	SOS2	-0.227931	0.103711	-2.19775	0.0279667	0.204543	0	1.27327	0.937658	-1.64367	-0.196403	-0.23281	-1.13809	-0.513696	-1.32282	-0.275904	-0.098261	-0.0759825	-0.201797	-0.169076	-0.756203	0.0281767	0.250302	0.106519	0.0314396	0.108331	0.326796
11060	WWP2	-0.394855	0.179721	-2.19705	0.028017	0.204745	54.5997	11.0131	0.0511199	-0.552219	-0.200829	-1.32313	-1.9833	-3.79798	-0.051822	-0.0923082	-0.100478	-0.436736	-0.353498	-1.38636	-0.0289704	0.027942	0.250315	0.108952	0.0317687	0.133244	0.312521
56940	DUSP22	-0.227891	0.103754	-2.19646	0.028059	0.204886	0	1.27404	0.93758	-1.46618	-1.22433	-0.0531327	-1.27672	-0.903318	0.031718	-0.245873	-0.627025	-0.0173352	-0.226528	-0.298404	0.0177311	0.0281223	0.262286	0.106447	0.031481	0.109126	0.312508
63916	ELMO2	-0.227869	0.103848	-2.19426	0.0282169	0.205871	0	2.7084	0.744834	-0.953972	0.577668	-1.27324	-2.10156	-0.0202322	-0.491241	-0.159633	0.290352	-0.419904	-0.374936	-0.00664761	-0.275444	0.0280009	0.252635	0.108763	0.0318297	0.107955	0.314397
6590	SLPI	-0.384205	0.175196	-2.193	0.0283072	0.206196	52.5421	10.5357	0.0614048	-3.31303	-2.11294	1.02385	-3.54388	-0.151244	-0.467181	-0.564367	-1.1389	0.336363	-0.642746	-0.0497009	-0.261878	0.0290183	0.290534	0.107931	0.0328943	0.107987	0.314214
54726	OTUD4	0.227735	0.103836	2.19323	0.028291	0.206196	0	2.69476	0.74692	0.738589	0.0213951	0.200016	2.47932	0.229135	0.848226	0.123513	0.0106976	0.0652734	0.443862	0.0753117	0.478496	0.0279654	0.250004	0.106499	0.0320501	0.108029	0.318224
10426	TUBGCP3	-0.227753	0.103902	-2.19199	0.0283801	0.206364	0	3.68071	0.596237	-1.85775	1.14581	0.0295814	-1.34101	-1.10866	-0.832544	-0.31225	0.585031	0.00965116	-0.238013	-0.367247	-0.469492	0.0282509	0.260696	0.106444	0.0315018	0.109729	0.318011
94120	SYTL3	-0.27196	0.124076	-2.19188	0.0283882	0.206364	18.2979	6.11979	0.294737	-1.54444	-1.19996	0.331823	-1.89418	0.000233711	-2.32072	-0.259105	-0.613953	0.108337	-0.337383	7.68e-05	-1.3946	0.0281455	0.261779	0.106597	0.0317252	0.107955	0.361123
23186	RCOR1	-0.227735	0.103907	-2.19173	0.0283991	0.206364	0	3.78013	0.581486	-2.01202	0.921723	-0.166852	-0.770625	-1.53562	-0.840361	-0.338535	0.467104	-0.0544462	-0.136454	-0.512563	-0.473979	0.0283103	0.256818	0.106482	0.0313533	0.111411	0.318116
55741	EDEM2	-0.227459	0.103904	-2.18914	0.0285866	0.206911	0	3.74048	0.587351	-1.8564	0.592262	0.683003	-1.76282	-0.586834	-0.904113	-0.312021	0.297768	0.223521	-0.313687	-0.193251	-0.510659	0.0282504	0.252771	0.1071	0.0316649	0.108446	0.319019
10201	NME6	-0.22742	0.103891	-2.18902	0.028595	0.206911	0	3.30213	0.653516	-1.00908	-0.546137	0.558953	-2.23174	-1.19419	0.241434	-0.168885	-0.27435	0.182737	-0.398608	-0.396103	0.135064	0.0280114	0.252352	0.106882	0.0319012	0.110019	0.312956
79665	DHX40	-0.279743	0.127794	-2.18901	0.0285958	0.206911	21.3694	6.35884	0.272851	-2.42518	0.297135	0.366073	-0.780696	-2.4673	-0.917441	-0.409376	0.148773	0.119539	-0.138241	-0.845223	-0.518348	0.0284943	0.250692	0.106631	0.0313552	0.117355	0.319217
9647	PPM1F	-0.291691	0.133265	-2.1888	0.028611	0.206911	25.7818	6.73689	0.240955	-0.0139557	-1.46781	-2.27384	-2.04892	-0.133285	-1.0772	-0.00233157	-0.759933	-0.768454	-0.365386	-0.0437977	-0.611102	0.0279124	0.268047	0.114213	0.0318021	0.10798	0.321836
663	BNIP2	-0.227087	0.103784	-2.18806	0.0286652	0.206911	0	2.16385	0.826039	-1.56099	-0.427522	0.562375	-1.38072	-0.991031	-1.0617	-0.261905	-0.214374	0.183861	-0.245112	-0.327742	-0.602052	0.0281506	0.251436	0.106887	0.0315152	0.109368	0.321562
9520	NPEPPS	-0.226943	0.103732	-2.18778	0.0286853	0.206911	0	1.31252	0.933638	-0.54825	-0.580409	-0.810592	-1.84561	-0.704623	-0.949554	-0.0916439	-0.291744	-0.265611	-0.328613	-0.232274	-0.536902	0.0279415	0.25266	0.107371	0.0317024	0.108664	0.319707
10158	PDZK1IP1	-0.227102	0.103813	-2.18761	0.0286981	0.206911	0	2.41296	0.789543	-2.12523	-0.467469	-0.267211	-0.995462	-0.84387	0.830062	-0.357879	-0.234537	-0.0872199	-0.176402	-0.278574	0.468068	0.0283571	0.251719	0.106543	0.0314021	0.108976	0.317977
9817	KEAP1	0.227054	0.103795	2.18752	0.0287044	0.206911	0	2.60857	0.760063	1.27118	-0.67804	0.989279	1.50512	0.292732	1.41012	0.212975	-0.341482	0.324856	0.267385	0.0962356	0.808636	0.0280699	0.253644	0.107831	0.0315598	0.108076	0.328847
130540	ALS2CR12	0.227203	0.103807	2.18872	0.0286175	0.206911	0	2.12763	0.831218	1.77805	-0.18008	-0.473464	1.69796	0.661162	0.424093	0.298703	-0.0900854	-0.154699	0.302011	0.217862	0.23761	0.0282222	0.250254	0.106757	0.0316368	0.108579	0.313911
79085	SLC25A23	0.227358	0.103799	2.19037	0.0284976	0.206911	0	2.81168	0.728992	1.34796	0.524031	-0.220026	1.73332	0.0754269	1.56822	0.225917	0.263147	-0.0718074	0.308374	0.0247835	0.90492	0.0280896	0.252164	0.10651	0.031652	0.107963	0.332972
65062	TMEM237	0.226779	0.103816	2.18443	0.028931	0.208377	0	2.33256	0.801474	0.811198	0.221668	-0.0187065	2.42484	0.386072	0.606507	0.135682	0.110919	-0.00610311	0.433876	0.126974	0.340617	0.0279763	0.250384	0.106443	0.0320159	0.108167	0.315401
145567	TTC7B	-0.226358	0.103747	-2.18182	0.0291226	0.209501	0	1.43346	0.920619	-2.1023	-0.291595	0.051357	-0.875417	-0.615979	-0.735323	-0.353957	-0.145992	0.0167558	-0.155061	-0.202896	-0.413865	0.0283474	0.250666	0.106446	0.0313745	0.108496	0.316782
6854	SYN2	-0.226492	0.103816	-2.18167	0.0291336	0.209501	0	3.47041	0.627869	-1.81156	0.192874	-0.49577	-1.07658	0.0556541	-1.8717	-0.304397	0.0964931	-0.16201	-0.19084	0.0182863	-1.09538	0.0282341	0.250291	0.106788	0.0314228	0.107959	0.342496
23564	DDAH2	-0.226258	0.103791	-2.17994	0.0292618	0.210202	0	2.19977	0.820869	-0.974611	0.580159	-1.0982	-1.85907	-0.280773	-0.961472	-0.163097	0.291617	-0.361171	-0.331044	-0.0923	-0.5438	0.0280047	0.252658	0.108159	0.0317086	0.108067	0.319893
51295	ECSIT	0.226619	0.103967	2.17973	0.0292777	0.210202	0	4.95088	0.421904	2.40738	1.13808	-0.27621	0.840272	-0.5295	1.24446	0.406309	0.580916	-0.0901602	0.148819	-0.174297	0.709548	0.0284856	0.260546	0.10655	0.0313671	0.108354	0.325086
1669	DEFA4	-0.317279	0.145597	-2.17916	0.0293196	0.210335	35.2022	7.71631	0.172579	-2.63161	-1.31621	0.659829	-3.21193	0.488739	-0.718353	-0.445047	-0.676676	0.215892	-0.579875	0.160835	-0.404187	0.0286001	0.264309	0.107056	0.032594	0.108295	0.316584
10653	SPINT2	-0.26234	0.120493	-2.17723	0.0294633	0.210938	15.2633	5.90063	0.316008	-3.18445	0.620135	-0.292131	-0.325069	-1.34398	-0.50036	-0.541648	0.311948	-0.0953629	-0.0575046	-0.446928	-0.280589	0.0289311	0.253041	0.106562	0.0312935	0.110583	0.314468
3772	KCNJ15	-0.300316	0.137944	-2.17709	0.029474	0.210938	29.6307	7.10537	0.212921	-3.05317	-0.280346	1.2716	-2.23799	-0.70698	-1.16616	-0.518555	-0.140346	0.41935	-0.399747	-0.233056	-0.663274	0.0288461	0.250616	0.108756	0.0319048	0.108669	0.323498
9500	MAGED1	0.251697	0.115595	2.17741	0.02945	0.210938	10.8762	5.61018	0.346016	3.08609	0.998774	-0.0682187	-0.00257896	0.805658	0.656134	0.524336	0.507358	-0.0222574	-0.000456124	0.265848	0.36878	0.028867	0.258044	0.106449	0.0312805	0.108884	0.3159
64759	TNS3	-0.225598	0.103706	-2.17536	0.0296034	0.211587	0	0.739752	0.980716	-1.43642	-0.832922	-0.0569339	-1.18091	-1.09183	-0.353511	-0.240848	-0.42105	-0.0185754	-0.209431	-0.361584	-0.197928	0.0281138	0.25554	0.106447	0.0314519	0.109675	0.313479
3932	LCK	0.225936	0.103867	2.17524	0.0296118	0.211587	0	3.36857	0.643361	2.39051	1.05206	0.352574	0.227391	0.169269	1.03645	0.403405	0.535369	0.115123	0.0402212	0.0556264	0.587334	0.0284774	0.258957	0.106617	0.0312869	0.107995	0.321124
150962	PUS10	-0.225624	0.103768	-2.17431	0.0296817	0.211918	0	1.68687	0.89055	-1.23081	-1.4306	-0.444688	-1.51304	0.037832	-0.603749	-0.206175	-0.739335	-0.145271	-0.268805	0.0124304	-0.339054	0.02806	0.267082	0.10672	0.0315628	0.107957	0.315374
414	ARSD	-0.631919	0.290745	-2.17345	0.0297465	0.212024	82.5243	28.6112	2.76e-05	1.12933	-2.08461	-3.04566	-5.45943	-1.48952	-0.811761	0.189096	-1.12121	-1.06048	-1.02722	-0.496706	-0.457573	0.0280365	0.289285	0.12124	0.0354023	0.111201	0.317734
147015	DHRS13	-0.37329	0.171756	-2.17337	0.0297523	0.212024	51.0423	10.2129	0.0694226	-3.66459	-0.706471	0.789472	-0.711637	-2.46981	-1.31305	-0.627037	-0.356023	0.258632	-0.125987	-0.84616	-0.750365	0.0292776	0.253961	0.107323	0.0313425	0.117375	0.326576
22882	ZHX2	0.225864	0.103933	2.17317	0.0297673	0.212024	0	3.98537	0.551524	1.78942	1.8199	1.31796	0.509598	-0.239549	0.374058	0.300635	0.96104	0.43499	0.0901747	-0.0787371	0.209471	0.0282262	0.278862	0.108932	0.0313123	0.108036	0.313597
30000	TNPO2	0.315277	0.145166	2.17184	0.0298675	0.212402	34.8111	7.67002	0.175384	3.20661	1.41591	-0.920441	2.26106	1.08745	-0.715279	0.545556	0.731231	-0.301987	0.403952	0.360111	-0.402435	0.0289458	0.266709	0.107643	0.031918	0.109661	0.316549
11258	DCTN3	0.248214	0.114286	2.17186	0.0298659	0.212402	9.66026	5.53466	0.35416	2.9583	0.646054	1.38115	-0.146729	0.426443	-0.16296	0.501927	0.325155	0.456373	-0.025952	0.140282	-0.0911276	0.0287871	0.253304	0.109183	0.0312832	0.108213	0.312708
2797	GNRH2	0.225548	0.103876	2.17131	0.0299077	0.212519	0	3.14295	0.677958	1.91013	1.5176	1.12482	0.746629	-0.245021	-0.152026	0.321167	0.787674	0.370073	0.132195	-0.0805369	-0.0850094	0.0282705	0.269388	0.108245	0.0313488	0.10804	0.312681
2799	GNS	-0.345599	0.159273	-2.16986	0.0300175	0.212734	43.7858	8.89454	0.113345	-2.62157	1.46053	0.221304	-2.57823	-2.32359	-1.26174	-0.443307	0.755894	0.0722248	-0.462031	-0.792104	-0.719802	0.0285947	0.267855	0.106511	0.0321144	0.11621	0.325453
6646	SOAT1	-0.225516	0.103941	-2.16966	0.0300325	0.212734	0	4.24337	0.514935	-1.16322	0.54795	0.679571	-2.36413	-0.865517	-0.705288	-0.194797	0.27527	0.22239	-0.422768	-0.28579	-0.396743	0.0280441	0.252368	0.107093	0.0319787	0.109029	0.316435
7337	UBE3A	0.225605	0.103964	2.17003	0.0300044	0.212734	0	4.36943	0.497541	0.36288	0.369773	0.0903049	2.9315	0.45628	0.00307007	0.0606403	0.185283	0.0294641	0.527402	0.150123	0.00171622	0.0279252	0.251073	0.106454	0.0323671	0.108251	0.3125
25842	ASF1A	0.22522	0.103763	2.17052	0.0299675	0.212734	0	1.54488	0.907834	0.877424	0.0269966	0.66964	2.21051	0.195647	0.335259	0.146788	0.0134984	0.219121	0.394742	0.0642989	0.187679	0.0279872	0.250006	0.107074	0.0318892	0.108009	0.313381
137209	ZNF572	0.358858	0.165501	2.16831	0.0301348	0.213124	47.4372	9.51242	0.0902898	0.0709901	1.89366	1.91472	0.328603	2.1903	1.373	0.0118604	1.0048	0.640322	0.05813	0.743503	0.786283	0.0279129	0.281551	0.111837	0.0312937	0.115228	0.327956
51389	RWDD1	0.321829	0.148407	2.16856	0.0301163	0.213124	36.9541	7.93073	0.160095	2.38927	-1.54217	0.733393	2.67234	0.424918	1.97042	0.403191	-0.80144	0.240125	0.479372	0.139779	1.15919	0.0284768	0.270072	0.107201	0.0321782	0.108212	0.346093
821	CANX	-0.224986	0.103797	-2.16755	0.0301927	0.213235	0	2.03184	0.844723	-1.15263	-1.69054	-0.679348	-1.09086	-0.931803	0.154513	-0.193016	-0.88575	-0.222317	-0.193383	-0.307921	0.0864011	0.0280417	0.274517	0.107093	0.0314266	0.109202	0.312687
9750	RIPOR2	-0.225103	0.103855	-2.16748	0.0301981	0.213235	0	3.53292	0.618412	-1.81849	0.549876	0.446788	-1.30613	-0.908169	-1.37523	-0.305575	0.276246	0.145959	-0.231779	-0.300024	-0.787624	0.0282366	0.252385	0.106723	0.0314904	0.109139	0.328009
7027	TFDP1	0.225162	0.103901	2.16708	0.0302287	0.213284	0	3.49229	0.624554	1.049	0.946832	0.314574	2.41243	-0.514544	-0.0900003	0.175592	0.48019	0.102698	0.431604	-0.169356	-0.0503168	0.0280194	0.257206	0.106581	0.0320082	0.108332	0.312563
221035	REEP3	-0.225081	0.103901	-2.16629	0.0302889	0.213541	0	3.93956	0.55815	-2.38387	-0.787762	-0.42642	-0.57525	-0.821665	1.06821	-0.402262	-0.397757	-0.139289	-0.101806	-0.271177	0.605852	0.0284742	0.254944	0.106698	0.031321	0.108922	0.321676
1955	MEGF9	-0.224795	0.103788	-2.1659	0.0303186	0.213583	0	2.26432	0.811493	-1.4559	0.278408	-0.185406	-0.958867	-1.71242	-0.933881	-0.244136	0.139373	-0.0605034	-0.169894	-0.573819	-0.527841	0.0281193	0.250607	0.106491	0.0313933	0.112287	0.319465
22878	TRAPPC8	-0.224489	0.103759	-2.16356	0.0304982	0.214567	0	1.50931	0.911993	-0.635595	-0.0681686	-0.785279	-2.16948	-0.624315	-0.261938	-0.106263	-0.0340868	-0.257247	-0.387277	-0.205656	-0.146554	0.0279516	0.250036	0.107313	0.0318664	0.108511	0.313037
81688	C6orf62	-0.284326	0.131422	-2.16346	0.0305059	0.214567	24.4845	6.62116	0.250373	-2.93926	-0.638143	0.116027	-0.0713591	-2.13738	-0.517445	-0.498598	-0.321121	0.0378578	-0.0126209	-0.724377	-0.290233	0.0287756	0.253222	0.106461	0.0312812	0.114859	0.314606
9475	ROCK2	-0.275761	0.127521	-2.16247	0.0305823	0.214936	21.1469	6.34091	0.274446	-1.06719	-0.180712	-2.19325	-0.647916	-0.646271	-2.2498	-0.178649	-0.0904022	-0.73934	-0.114687	-0.212927	-1.3457	0.0280232	0.250255	0.113635	0.0313319	0.108551	0.357773
148327	CREB3L4	0.224474	0.103922	2.16002	0.0307714	0.216097	0	4.5915	0.467735	2.61035	0.23766	-0.125108	0.212243	0.510685	1.43711	0.441363	0.118935	-0.0408213	0.0375412	0.168081	0.824948	0.0285888	0.250442	0.106465	0.0312861	0.108326	0.329513
84280	BTBD10	-0.223989	0.103768	-2.15856	0.0308841	0.216719	0	1.67871	0.891571	-1.27707	-0.726035	0.410622	-1.58629	-1.19382	-0.26449	-0.213966	-0.366045	0.134116	-0.281945	-0.395976	-0.147984	0.0280713	0.254187	0.106679	0.0315911	0.110018	0.313047
90871	DMAC1	0.224292	0.103937	2.15796	0.0309312	0.21688	0	4.16093	0.526487	1.1745	-1.14384	0.186109	1.69804	1.75641	0.356311	0.196695	-0.583981	0.0607329	0.302027	0.589174	0.199501	0.0280467	0.260657	0.106491	0.0316369	0.112522	0.313495
146923	RUNDC1	-0.223871	0.103771	-2.15736	0.0309776	0.216986	0	1.711	0.887511	-1.00034	-0.754	0.0191027	-1.96105	-0.938753	0.262049	-0.167418	-0.380394	0.00623238	-0.349473	-0.310245	0.146616	0.0280097	0.254522	0.106443	0.0317576	0.109221	0.313037
54962	TIPIN	-0.223638	0.103673	-2.15714	0.0309946	0.216986	0	0.28765	0.997869	-1.30739	-0.808174	-0.769196	-1.21453	-0.715011	-0.0227237	-0.219076	-0.408275	-0.251937	-0.215428	-0.235721	-0.012703	0.028079	0.255209	0.107278	0.0314618	0.108686	0.312504
3428	IFI16	-0.270645	0.125483	-2.15682	0.0310196	0.216993	19.5824	6.21754	0.285623	-2.89519	-0.359191	1.17171	-2.16039	-0.395158	-0.29179	-0.490896	-0.179959	0.385776	-0.385624	-0.129969	-0.16329	0.0287491	0.251012	0.108401	0.0318614	0.108177	0.313167
7852	CXCR4	-0.26636	0.12357	-2.15554	0.0311194	0.217304	17.8604	6.0872	0.297826	-0.909001	0.291799	-1.75375	-2.51166	0.62068	-1.43372	-0.152085	0.146094	-0.584111	-0.449797	0.204452	-0.822899	0.0279927	0.250667	0.110932	0.0320708	0.108505	0.329429
25829	TMEM184B	-0.223411	0.103684	-2.15474	0.0311826	0.217304	0	0.501922	0.992053	-1.60452	-0.621607	-0.0935329	-1.13716	-0.853029	-0.392917	-0.269274	-0.312697	-0.0305174	-0.201631	-0.281626	-0.220072	0.0281642	0.253056	0.106455	0.0314394	0.108998	0.313711
10397	NDRG1	-0.223888	0.103906	-2.15472	0.0311836	0.217304	0	3.81716	0.576029	-1.27848	0.535968	0.611906	-1.8231	-1.56152	-0.633841	-0.214204	0.269195	0.200131	-0.324553	-0.521494	-0.356121	0.0280717	0.252265	0.10697	0.031692	0.111533	0.315671
353088	ZNF429	-0.289508	0.13438	-2.1544	0.0312091	0.217304	26.9147	6.84132	0.232712	-1.23189	0.603883	-1.07115	-3.63442	0.114371	-0.193573	-0.206357	0.303677	-0.352136	-0.660049	0.0375815	-0.108262	0.0280602	0.252882	0.108074	0.0329824	0.107973	0.312793
283130	SLC25A45	0.223587	0.103771	2.15462	0.0311917	0.217304	0	1.93149	0.858541	0.949502	0.592302	0.961063	1.71887	0.901671	-0.793926	0.158882	0.297788	0.315475	0.305775	0.297854	-0.447357	0.028	0.252771	0.107752	0.0316458	0.109122	0.317503
79777	ACBD4	0.226896	0.105261	2.15555	0.031119	0.217304	1.20582	5.06103	0.408478	1.46531	-0.509126	1.46382	1.90322	-1.0409	0.779729	0.245728	-0.2556	0.484456	0.339016	-0.344469	0.439233	0.028122	0.252042	0.109531	0.0317295	0.109516	0.317323
25873	RPL36	0.320972	0.149023	2.15385	0.0312523	0.217437	37.4807	7.99753	0.156372	0.543379	0.48538	-0.237007	2.27812	1.97037	2.38931	0.0908289	0.243588	-0.0773532	0.407063	0.664592	1.44256	0.027941	0.251854	0.106521	0.0319278	0.113766	0.364525
1611	DAP	-0.223744	0.103914	-2.15316	0.031306	0.217642	0	4.06298	0.540384	-0.568672	-0.638043	-0.509887	-1.06992	-2.46009	-0.715418	-0.0950614	-0.32107	-0.166639	-0.189654	-0.842542	-0.402514	0.0279438	0.253221	0.106808	0.031421	0.117295	0.31655
6310	ATXN1	-0.223599	0.103979	-2.15042	0.0315218	0.218973	0	4.78098	0.44319	-0.221895	-1.42721	0.30046	-2.19654	-1.49692	-0.404097	-0.0370751	-0.737461	0.0980849	-0.392201	-0.499251	-0.226359	0.0279172	0.266995	0.106569	0.0318814	0.111234	0.313781
6667	SP1	-0.223049	0.103868	-2.14742	0.0317595	0.220454	0	3.46402	0.628838	-1.04159	0.504698	-0.66799	-0.993214	-2.14648	-0.834131	-0.174348	0.253359	-0.218578	-0.176002	-0.727657	-0.470402	0.0280179	0.252006	0.107071	0.0314016	0.114921	0.318032
56954	NIT2	-0.22319	0.103981	-2.14644	0.0318377	0.220656	0	4.74102	0.448296	-1.37839	0.00486946	0.515115	-2.66731	0.165044	0.202827	-0.231052	0.00243473	0.168353	-0.478443	0.0542372	0.113442	0.0280978	0.25	0.106816	0.0321747	0.107993	0.312822
8711	TNK1	0.222653	0.103726	2.14655	0.0318295	0.220656	0	1.11795	0.952503	1.17162	1.41865	0.853591	0.997287	0.737552	0.2705	0.19621	0.732741	0.279833	0.176727	0.243205	0.151353	0.0280461	0.266778	0.107473	0.0314025	0.108733	0.313073
79652	TMEM204	0.223079	0.103971	2.14559	0.0319053	0.220955	0	4.69689	0.45398	2.22591	1.08121	1.66047	-0.277076	0.335305	0.480024	0.375123	0.55076	0.55184	-0.0490119	0.110251	0.269118	0.028401	0.259479	0.11045	0.0312899	0.108114	0.314311
27036	SIGLEC7	-0.222441	0.10383	-2.14235	0.032165	0.222582	0	2.60871	0.760042	-1.09385	0.936503	-0.654903	-1.99561	-0.83589	-0.121595	-0.183131	0.474803	-0.214271	-0.355727	-0.275915	-0.067986	0.0280288	0.257045	0.107047	0.0317749	0.108956	0.312616
114790	STK11IP	-0.222266	0.103765	-2.14201	0.0321923	0.222599	0	2.18677	0.822744	-0.56368	-0.11608	-0.264697	-2.01974	-0.921008	-1.20255	-0.094226	-0.0580523	-0.0863987	-0.360097	-0.304314	-0.68474	0.0279432	0.250105	0.106541	0.0317871	0.109173	0.324222
84067	FAM160A2	-0.22225	0.103797	-2.1412	0.0322576	0.22288	0	2.80145	0.730564	-1.22279	-1.44828	-0.67981	-0.475325	-1.12491	-1.35646	-0.204824	-0.749109	-0.222469	-0.0841046	-0.37272	-0.776349	0.0280581	0.267536	0.107094	0.0313082	0.109782	0.327568
23648	SSBP3	0.222405	0.103898	2.1406	0.0323063	0.223045	0	4.00338	0.54893	1.73661	1.29797	0.77822	1.12184	-0.940676	1.06584	0.291666	0.666773	0.254916	0.198901	-0.310888	0.604466	0.0282078	0.263893	0.107298	0.0314351	0.109226	0.321634
54623	PAF1	-0.258343	0.120706	-2.14027	0.0323327	0.223056	15.2384	5.8989	0.316181	-1.76662	0.959267	-0.627036	-1.19535	-2.50023	0.27607	-0.296762	0.486682	-0.205105	-0.212006	-0.857509	0.154475	0.0282182	0.257402	0.106996	0.0314561	0.11763	0.313097
51366	UBR5	-0.221807	0.103667	-2.13961	0.0323866	0.223175	0	0.657751	0.985207	-1.0045	-0.287012	-0.824276	-1.18939	-1.00779	-1.01713	-0.168117	-0.143691	-0.270135	-0.210943	-0.333359	-0.57609	0.0280105	0.250645	0.107403	0.0314544	0.109417	0.320797
5218	CDK14	-0.285684	0.133557	-2.13904	0.0324321	0.223175	26.1928	6.77441	0.237965	-2.99905	1.15025	0.34923	-2.1374	-0.593442	-1.15909	-0.509064	0.587397	0.11403	-0.381445	-0.195437	-0.659114	0.0288122	0.260782	0.106614	0.0318489	0.108457	0.323361
340061	TMEM173	-0.2219	0.103755	-2.13869	0.032461	0.223175	0	1.59275	0.902124	-1.34315	-0.345536	0.111881	-1.78591	-0.951094	0.369749	-0.225107	-0.173091	0.0365048	-0.317847	-0.314372	0.20705	0.0280883	0.250936	0.10646	0.0316752	0.109255	0.313572
55762	ZNF701	-0.26297	0.122974	-2.13841	0.0324832	0.223175	17.2662	6.04348	0.302011	-1.45145	-2.01651	0.120537	-2.53771	-0.0716139	0.620014	-0.243385	-1.07915	0.0393296	-0.454581	-0.0235306	0.348276	0.0281181	0.286393	0.106463	0.0320878	0.107962	0.315532
11216	AKAP10	-0.222287	0.103959	-2.13822	0.0324987	0.223175	0	4.79355	0.441592	-2.21583	-1.1175	-0.771456	0.447166	-1.25627	-0.912981	-0.373395	-0.569985	-0.252683	0.079118	-0.417118	-0.515774	0.0283965	0.260153	0.107283	0.031305	0.110244	0.319151
6015	RING1	0.221984	0.103771	2.13918	0.032421	0.223175	0	1.91987	0.860117	2.1732	0.619215	0.624523	0.212143	0.734503	0.644363	0.366091	0.311479	0.204279	0.0375236	0.242193	0.362094	0.0283777	0.253032	0.106992	0.031286	0.108726	0.315778
409	ARRB2	-0.221856	0.103892	-2.13545	0.0327239	0.224523	0	3.7585	0.584683	-0.850305	1.00296	-0.91543	-2.22905	-0.214798	-0.858435	-0.142239	0.509551	-0.300324	-0.398119	-0.0705965	-0.484362	0.0279826	0.258114	0.107629	0.0318997	0.10802	0.318365
254428	SLC41A1	0.221959	0.103967	2.13489	0.0327699	0.224523	0	4.6474	0.460408	2.33511	0.255606	-0.599694	1.66344	-0.655053	0.3624	0.393873	0.127934	-0.196118	0.295804	-0.215837	0.202921	0.0284511	0.250511	0.106949	0.0316223	0.108568	0.313529
93185	IGSF8	0.223544	0.104697	2.13515	0.032749	0.224523	0.726123	5.03657	0.411433	1.66782	0.174341	1.72601	0.817605	-0.73208	1.63195	0.279999	0.0872121	0.574491	0.144793	-0.241388	0.944262	0.0281846	0.250238	0.110785	0.0313624	0.108721	0.334791
5868	RAB5A	-0.251227	0.117752	-2.13353	0.0328813	0.224946	12.6961	5.72712	0.333683	-2.15839	-0.938991	1.15209	-1.03587	-1.87209	-0.528078	-0.363555	-0.476101	0.379201	-0.183592	-0.629795	-0.296239	0.0283713	0.257083	0.108335	0.0314122	0.113174	0.314694
57418	WDR18	0.253419	0.118796	2.13322	0.0329068	0.224946	13.6217	5.78849	0.327346	1.44627	1.5092	1.62189	0.838941	-0.600556	1.77282	0.242511	0.782981	0.538552	0.148582	-0.197791	1.03243	0.0281166	0.269158	0.110259	0.0313668	0.108469	0.339148
55758	RCOR3	0.221681	0.103907	2.13346	0.0328866	0.224946	0	3.76282	0.584044	2.32591	-0.00922305	0.0175855	1.58445	-0.557851	-0.28736	0.392291	-0.00461153	0.00573738	0.281614	-0.183667	-0.160805	0.0284467	0.250001	0.106443	0.0315903	0.108398	0.313146
7850	IL1R2	-0.221525	0.103933	-2.13141	0.0330557	0.225636	0	4.96542	0.420115	-1.13086	1.30075	-0.243179	-1.87616	-0.771159	-1.53744	-0.189353	0.668282	-0.0793694	-0.334128	-0.254372	-0.886035	0.0280369	0.263956	0.106525	0.0317166	0.108806	0.332126
9961	MVP	-0.221593	0.103967	-2.13138	0.0330578	0.225636	0	4.62192	0.463738	-1.80692	1.25352	0.378323	-1.81321	-0.925333	-0.203336	-0.303607	0.64274	0.123546	-0.322769	-0.305759	-0.113727	0.0282324	0.26291	0.106643	0.0316875	0.109185	0.312823
147798	TMC4	-0.221263	0.103847	-2.13067	0.0331167	0.225695	0	3.63483	0.603092	-1.46159	-0.17029	0.832798	-1.5052	-1.00598	-1.42763	-0.245099	-0.0851838	0.272953	-0.267401	-0.332752	-0.819213	0.028121	0.250227	0.107423	0.0315599	0.109411	0.329278
118672	PSTK	0.221143	0.103787	2.13075	0.0331099	0.225695	0	2.82485	0.726966	1.35361	1.11169	1.13604	0.856848	-0.201445	1.4938	0.226871	0.566899	0.373828	0.151762	-0.0662052	0.859377	0.0280911	0.260043	0.108281	0.0313705	0.108012	0.330963
55106	SLFN12	-0.221319	0.103906	-2.12999	0.0331723	0.225903	0	3.99261	0.550481	-0.558556	-1.11637	-0.447465	-2.37617	-0.60963	0.867836	-0.0933686	-0.569384	-0.146181	-0.424969	-0.200794	0.489768	0.0279427	0.260131	0.106724	0.031986	0.108485	0.318497
196394	AMN1	-0.343815	0.161439	-2.12969	0.0331975	0.225904	45.2627	9.13453	0.103817	-2.4385	-1.86432	0.635469	-3.26757	0.511925	-1.31523	-0.411672	-0.98732	0.207878	-0.590355	0.168491	-0.751669	0.0285008	0.280463	0.107011	0.032642	0.108328	0.326625
3796	KIF2A	-0.220635	0.103699	-2.12766	0.0333654	0.226875	0	0.771608	0.978809	-1.56444	-0.718797	-0.244118	-1.46413	-0.335448	0.136455	-0.262488	-0.362335	-0.0796759	-0.260041	-0.110298	0.0762985	0.0281516	0.254103	0.106526	0.0315447	0.108115	0.312646
84895	MIGA2	0.220922	0.103851	2.12731	0.0333945	0.226901	0	3.03572	0.694479	2.34342	0.36672	-0.528473	1.19757	-0.0369131	0.469311	0.395301	0.183747	-0.172735	0.212402	-0.0121284	0.263078	0.028455	0.251055	0.106835	0.0314568	0.107956	0.31423
23326	USP22	-0.220894	0.103862	-2.1268	0.0334364	0.227014	0	3.55435	0.61518	-1.12626	0.379954	0.333395	-1.47146	-1.82989	-1.01978	-0.18858	0.190407	0.108852	-0.261354	-0.614937	-0.577633	0.0280359	0.251133	0.106598	0.0315474	0.11293	0.320842
23209	MLC1	-0.220567	0.103751	-2.12592	0.0335103	0.22718	0	1.72946	0.885168	-1.89096	-0.382739	-1.09515	-0.211867	-0.90593	-0.679567	-0.317902	-0.191809	-0.360153	-0.0374747	-0.299277	-0.382102	0.0282633	0.25115	0.108149	0.031286	0.109133	0.31615
2207	FCER1G	-0.220605	0.10377	-2.1259	0.0335113	0.22718	0	2.33638	0.800909	-0.688493	0.455595	-0.665131	-1.70138	-1.18781	-1.19427	-0.115121	0.22854	-0.217637	-0.302627	-0.393945	-0.679849	0.0279584	0.251632	0.107066	0.0316383	0.109997	0.324055
51167	CYB5R4	-0.220456	0.103724	-2.1254	0.0335529	0.22729	0	1.18147	0.946643	-1.75589	-0.602291	-0.127161	-0.890192	-1.19733	0.103474	-0.294939	-0.302867	-0.0414915	-0.157686	-0.397165	0.0578516	0.0282144	0.252867	0.106465	0.0313777	0.11003	0.312584
58525	WIZ	0.339868	0.159955	2.12478	0.0336052	0.227474	44.5742	9.02107	0.108227	3.92622	1.50583	-0.29142	2.05339	-0.660631	0.991108	0.674247	0.781097	-0.0951304	0.366197	-0.217686	0.560977	0.0294909	0.269066	0.106562	0.0318044	0.108578	0.320367
8515	ITGA10	0.247494	0.116503	2.12436	0.0336398	0.227537	11.5737	5.65443	0.341309	0.523417	1.13924	0.368176	2.06015	2.05659	-0.959949	0.087489	0.581537	0.120227	0.367423	0.695349	-0.542918	0.027939	0.260568	0.106633	0.0318079	0.114317	0.319869
3087	HHEX	-0.220286	0.103734	-2.12355	0.0337074	0.227575	0	1.33994	0.930769	-2.07591	-0.0573861	-0.20037	-0.731068	-0.956717	-0.216348	-0.349447	-0.0286945	-0.0653892	-0.129434	-0.316253	-0.121013	0.0283364	0.250026	0.106499	0.031346	0.109271	0.312866
84910	TMEM87B	-0.220176	0.103686	-2.12349	0.0337126	0.227575	0	0.772937	0.978727	-0.954354	-0.375957	-0.31093	-1.4248	-1.3091	-0.624142	-0.159697	-0.188395	-0.101507	-0.252999	-0.435056	-0.350618	0.0280009	0.251109	0.106578	0.0315306	0.110445	0.315573
156	GRK2	-0.220458	0.10385	-2.12284	0.0337672	0.227575	0	2.99301	0.701064	-1.84135	0.433638	-1.59712	-1.1421	0.215669	0.138433	-0.309461	0.217459	-0.53004	-0.202511	0.0708828	0.0774047	0.0282449	0.251478	0.110139	0.0314407	0.108021	0.31265
81889	FAHD1	-0.228536	0.107678	-2.1224	0.0338039	0.227575	3.49763	5.18122	0.394167	-2.22883	-1.16165	-1.01445	-0.028888	-1.32487	0.939428	-0.375624	-0.593475	-0.333235	-0.00510922	-0.44042	0.531047	0.0284023	0.261007	0.107904	0.0312806	0.110507	0.31955
2580	GAK	-0.220119	0.103723	-2.12219	0.0338221	0.227575	0	1.15016	0.949568	-0.668871	-0.578043	-0.983236	-1.83349	-0.729359	0.109156	-0.111835	-0.290542	-0.322846	-0.326427	-0.240485	0.0610291	0.0279558	0.252638	0.107814	0.0316968	0.108716	0.312593
4756	NEO1	-0.220291	0.103804	-2.12218	0.0338225	0.227575	0	2.56444	0.766761	-1.30087	0.274135	0.507037	-1.86306	-0.94121	-0.828692	-0.217978	0.137229	0.165704	-0.331763	-0.311066	-0.467281	0.0280774	0.250588	0.106804	0.0317105	0.109228	0.317959
84181	CHD6	0.220583	0.103938	2.12225	0.0338166	0.227575	0	4.46164	0.485033	2.27598	-1.33945	0.592715	0.759083	0.66771	0.786147	0.383714	-0.689328	0.193825	0.134405	0.220032	0.442904	0.0284236	0.264849	0.106937	0.0313511	0.108592	0.317404
79651	RHBDF2	-0.220194	0.103782	-2.12169	0.0338638	0.227678	0	2.05186	0.841923	-1.85318	0.575534	-0.313169	-1.34564	-0.871595	0.345575	-0.311473	0.289268	-0.102239	-0.23884	-0.287817	0.193471	0.0282492	0.252615	0.10658	0.0315034	0.109045	0.313436
6500	SKP1	0.220313	0.103853	2.1214	0.0338884	0.227678	0	3.01804	0.697204	0.264453	0.247419	0.459636	2.45544	1.07086	-0.00576242	0.0441875	0.123828	0.150168	0.439482	0.354532	-0.00322129	0.0279192	0.250479	0.106739	0.032035	0.109608	0.3125
116369	SLC26A8	-0.284058	0.134158	-2.11734	0.0342311	0.229808	26.6209	6.81393	0.23485	-2.00395	-0.131508	1.26348	-2.23856	-1.33324	-1.66866	-0.337158	-0.0657719	0.416615	-0.399852	-0.443271	-0.967077	0.0283071	0.250135	0.108726	0.0319051	0.11054	0.335881
84162	KIAA1109	-0.219928	0.103893	-2.11688	0.0342704	0.229901	0	3.66622	0.598399	-2.46502	0.176499	0.30586	-0.743455	-1.13753	0.315727	-0.416245	0.0882925	0.0998498	-0.131632	-0.376974	0.176717	0.028514	0.250244	0.106574	0.0313482	0.109824	0.313281
23012	STK38L	-0.236107	0.111568	-2.11625	0.0343232	0.230083	7.06084	5.37986	0.371299	-1.42584	-0.105541	-1.53695	-0.350456	-2.341	0.517808	-0.23906	-0.0527798	-0.509418	-0.0619976	-0.798496	0.290439	0.0281108	0.250087	0.109857	0.0312956	0.116344	0.314609
9209	LRRFIP2	-0.276186	0.130606	-2.11464	0.0344604	0.230825	23.7838	6.56029	0.255449	-2.49107	-0.653458	0.529264	-0.306458	-2.0827	-1.35213	-0.420741	-0.328931	0.172994	-0.054211	-0.704708	-0.773754	0.028527	0.253381	0.106836	0.031292	0.114489	0.327467
3674	ITGA2B	-0.26067	0.123286	-2.11435	0.0344852	0.230825	17.5614	6.06512	0.299934	-0.727144	0.875263	-0.113728	-2.25603	-2.19976	-0.994833	-0.121596	0.442966	-0.0371076	-0.403035	-0.746932	-0.563139	0.0279637	0.256132	0.106461	0.0319151	0.115295	0.320428
23287	AGTPBP1	-0.219539	0.103875	-2.11348	0.0345594	0.23115	0	4.17361	0.524701	-1.16349	0.22917	0.731783	-1.85331	-1.02438	-1.48815	-0.194842	0.114679	0.239594	-0.330003	-0.338922	-0.855935	0.0280442	0.250411	0.107198	0.0317059	0.109466	0.330816
79180	EFHD2	-0.219104	0.103738	-2.11208	0.0346793	0.231779	0	1.40823	0.923411	-1.60614	0.554276	-0.719338	-1.51189	-0.419926	0.0511486	-0.269547	0.278478	-0.235491	-0.2686	-0.138133	0.0285939	0.0281647	0.252423	0.107172	0.0315624	0.108206	0.31252
28959	TMEM176B	0.219075	0.10378	2.11096	0.0347757	0.232251	0	2.58844	0.76312	1.63679	0.14121	-0.100454	1.62014	-0.245985	1.28456	0.27474	0.0706272	-0.0327758	0.288024	-0.0808542	0.733379	0.0281745	0.250156	0.106457	0.0316046	0.108041	0.325946
2841	GPR18	0.219283	0.103899	2.11054	0.0348122	0.232322	0	3.9869	0.551303	1.95248	0.0828607	-0.74169	0.776691	1.70768	0.743431	0.328382	0.0414348	-0.242861	0.13753	0.572167	0.418492	0.0282868	0.250054	0.107219	0.0313544	0.112262	0.316878
26020	LRP10	-0.291285	0.138066	-2.10975	0.0348802	0.232604	29.4691	7.08909	0.214099	-1.42266	0.20544	0.423534	-1.57601	-2.93443	-1.00156	-0.238523	0.102788	0.138344	-0.280099	-1.0239	-0.567044	0.0281099	0.25033	0.106694	0.031587	0.121749	0.320538
51809	GALNT7	-0.224796	0.106571	-2.10935	0.0349146	0.23266	2.45391	5.12578	0.400723	-1.3828	0.372754	0.820124	-2.65222	-0.438921	0.0053261	-0.231795	0.186783	0.268762	-0.475661	-0.144397	0.00297738	0.0280989	0.25109	0.107393	0.0321643	0.108229	0.3125
57053	CHRNA10	-0.218693	0.10371	-2.10869	0.0349711	0.232814	0	1.02784	0.960289	-1.16237	0.388104	-0.970462	-1.58192	-0.724195	-0.063083	-0.194653	0.19451	-0.318599	-0.281161	-0.23877	-0.0352662	0.0280439	0.251182	0.107778	0.0315893	0.108705	0.312531
54407	SLC38A2	-0.219017	0.103874	-2.10848	0.0349894	0.232814	0	4.39541	0.493998	-1.10609	0.0223367	0.218882	-1.01847	-1.97619	-1.62069	-0.185188	0.0111684	0.0714339	-0.180496	-0.666661	-0.93729	0.0280315	0.250004	0.10651	0.0314078	0.113802	0.334463
7033	TFF3	-0.218566	0.103777	-2.1061	0.0351953	0.234011	0	2.20972	0.819431	-1.51001	-1.42759	0.264901	-1.23742	-0.315997	-0.791201	-0.253282	-0.737674	0.0864653	-0.219512	-0.103894	-0.445797	0.0281351	0.267005	0.106541	0.0314688	0.108097	0.317468
2997	GYS1	-0.21854	0.103874	-2.10389	0.0353876	0.235116	0	3.37741	0.642013	-1.55215	-0.254598	0.517814	-2.24405	0.160915	-0.00307393	-0.26041	-0.127428	0.169238	-0.400851	0.0528801	-0.00171838	0.0281478	0.250507	0.106819	0.0319082	0.107991	0.3125
10144	FAM13A	-0.380061	0.180754	-2.10265	0.0354966	0.235666	55.0647	11.1271	0.0489174	-2.28063	-1.12678	1.12187	-2.15796	-3.41503	-0.160983	-0.384513	-0.574913	0.369084	-0.385183	-1.21952	-0.0900216	0.0284258	0.260329	0.108235	0.0318601	0.127523	0.312703
23469	PHF3	0.218261	0.10384	2.10189	0.0355629	0.235932	0	3.54128	0.617151	0.56685	0.204082	1.63643	1.77132	-0.241348	1.31246	0.0947565	0.102107	0.543555	0.315218	-0.0793288	0.750015	0.0279436	0.250326	0.11033	0.0316687	0.108037	0.326563
220064	ORAOV1	0.262098	0.124757	2.10086	0.0356532	0.236357	18.8141	6.15871	0.291081	2.61863	-1.54359	1.43831	1.27681	0.761169	-0.168637	0.442797	-0.802237	0.475776	0.226542	0.251052	-0.0943043	0.0285932	0.270112	0.109421	0.031481	0.108784	0.312722
22990	PCNX1	-0.218278	0.103925	-2.10035	0.0356982	0.236364	0	4.84324	0.435309	-1.37032	-0.891449	0.938669	-1.91891	0.0370024	-1.42041	-0.22969	-0.451364	0.308037	-0.341851	0.0121578	-0.81485	0.0280956	0.256367	0.107691	0.031737	0.107956	0.329099
26873	OPLAH	-0.417713	0.198887	-2.10025	0.0357068	0.236364	62.9157	13.4828	0.0192511	-5.25017	-0.66503	1.1401	-2.12808	-1.36465	-1.13516	-0.922397	-0.334837	0.375188	-0.379752	-0.453973	-0.645048	0.0308666	0.253504	0.108295	0.0318439	0.110666	0.322902
126375	ZNF792	-0.217796	0.103742	-2.0994	0.0357819	0.236671	0	1.54769	0.907502	-0.50505	-0.203658	-1.3372	-1.67655	-1.02008	-0.138312	-0.0844161	-0.101895	-0.441494	-0.298161	-0.337479	-0.0773373	0.0279371	0.250324	0.109007	0.0316278	0.109453	0.31265
54949	SDHAF2	-0.218152	0.103925	-2.09913	0.0358058	0.236671	0	4.3685	0.497668	-1.0473	-0.540455	0.498706	-1.15595	-2.3408	-0.567117	-0.175306	-0.271469	0.162973	-0.204981	-0.798424	-0.31831	0.0280191	0.252303	0.106792	0.0314447	0.116342	0.315033
3587	IL10RA	-0.259379	0.123688	-2.09705	0.035989	0.237707	17.8563	6.08689	0.297856	-0.60571	-0.182627	-2.79159	-1.90748	-0.0516017	-0.0341084	-0.101261	-0.091361	-0.961394	-0.339785	-0.0169548	-0.0190675	0.027948	0.250261	0.118604	0.0317315	0.107958	0.312509
5782	PTPN12	-0.308705	0.147283	-2.096	0.036082	0.238147	36.3748	7.85852	0.164207	-1.71576	-0.466362	1.23885	-2.94242	-1.13118	-1.78892	-0.288128	-0.233977	0.408324	-0.529434	-0.374833	-1.04262	0.0282006	0.251711	0.108636	0.0323755	0.109803	0.339676
372	ARCN1	-0.245319	0.117071	-2.09548	0.0361285	0.238243	12.027	5.68356	0.338237	-1.38062	1.32492	-1.19272	-0.989973	-2.1538	-0.607564	-0.231427	0.681412	-0.392827	-0.175426	-0.7303	-0.341217	0.0280984	0.26451	0.108473	0.0314008	0.114972	0.315411
10538	BATF	-0.217782	0.103941	-2.09524	0.0361495	0.238243	0	4.72473	0.450389	-1.94103	0.806286	0.860231	-1.54606	-0.805644	-0.957969	-0.32643	0.407301	0.282032	-0.274727	-0.265844	-0.541772	0.0282824	0.255184	0.107489	0.0315754	0.108884	0.319838
283209	PGM2L1	-0.460603	0.219896	-2.09464	0.0362027	0.238418	69.2073	16.2376	0.00619748	-1.83566	-0.00515099	-1.14237	-0.126346	-4.38219	-1.22186	-0.308493	-0.00257549	-0.375946	-0.0223466	-1.66555	-0.696156	0.0282428	0.25	0.108302	0.0312825	0.144455	0.324616
317	APAF1	-0.258453	0.123437	-2.0938	0.0362775	0.23857	17.7052	6.07572	0.298921	-1.94529	0.921615	-0.0153925	-0.907051	-2.07979	-1.55265	-0.327155	0.467048	-0.00502189	-0.160682	-0.703661	-0.895356	0.028284	0.256817	0.106443	0.0313814	0.11447	0.332542
57567	ZNF319	-0.217439	0.10385	-2.09379	0.0362788	0.23857	0	3.25274	0.661085	-1.84979	0.649705	-0.265941	-0.610632	-1.74668	-0.546213	-0.310898	0.327017	-0.0868051	-0.108077	-0.585774	-0.306487	0.028248	0.253342	0.106542	0.0313262	0.112469	0.314848
132299	OCIAD2	0.217378	0.103847	2.09326	0.0363259	0.238706	0	3.63073	0.603705	1.67565	-0.986712	1.0488	0.607252	1.09414	1.25108	0.281325	-0.501037	0.344679	0.107478	0.36236	0.713475	0.0281872	0.257845	0.108006	0.0313257	0.109682	0.325226
26249	KLHL3	0.217526	0.103951	2.09259	0.0363856	0.238923	0	4.96906	0.419667	1.58625	-0.915084	1.13116	1.69886	-0.800445	1.08999	0.26618	-0.463649	0.372195	0.302174	-0.264113	0.618577	0.0281584	0.256718	0.108265	0.0316372	0.108872	0.322066
81027	TUBB1	-0.29132	0.139275	-2.09169	0.0364663	0.239279	30.4152	7.18547	0.207208	-1.90431	0.13591	0.556201	-2.01938	-2.78849	0.270359	-0.320176	0.0679745	0.181834	-0.360032	-0.967	0.151273	0.0282683	0.250144	0.106878	0.0317869	0.120258	0.313072
100170841	EPOP	0.21744	0.103971	2.09136	0.0364961	0.2393	0	4.98866	0.417266	2.43799	0.0620235	0.812045	0.990975	-1.18959	0.598493	0.411585	0.0310136	0.266091	0.175604	-0.394549	0.336076	0.0285006	0.25003	0.107374	0.031401	0.110003	0.315324
100170841		0.21744	0.103971	2.09136	0.0364961	0.2393	0	4.98866	0.417266	2.43799	0.0620235	0.812045	0.990975	-1.18959	0.598493	0.411585	0.0310136	0.266091	0.175604	-0.394549	0.336076	0.0285006	0.25003	0.107374	0.031401	0.110003	0.315324
51147	ING4	0.217281	0.10393	2.09065	0.0365595	0.239541	0	4.33764	0.501896	2.31726	-0.172014	0.842239	-0.00695438	1.58294	-0.306706	0.390805	-0.0860468	0.276076	-0.00122997	0.528889	-0.171656	0.0284427	0.250231	0.107445	0.0312806	0.111635	0.313237
25855	BRMS1	-0.217019	0.10384	-2.08995	0.0366224	0.239641	0	3.02818	0.695642	-0.748357	0.648173	-1.27869	-1.7926	-1.20122	0.352817	-0.12515	0.326235	-0.421742	-0.319054	-0.398479	0.197538	0.0279668	0.253326	0.108783	0.0316782	0.110044	0.313476
121260	SLC15A4	-0.216979	0.103839	-2.08958	0.0366557	0.239641	0	2.95676	0.706652	-1.42777	-0.563861	0.763641	-1.97929	-0.662042	0.166139	-0.239385	-0.283342	0.250103	-0.352773	-0.218153	0.0929064	0.0281114	0.252509	0.107266	0.0317667	0.108581	0.312716
285971	ZNF775	-0.216834	0.103784	-2.08929	0.0366813	0.239641	0	2.22604	0.817066	-1.30943	0.155484	-0.321448	-1.09371	-1.88364	0.0691519	-0.219421	0.0777716	-0.104946	-0.19389	-0.63387	0.0386594	0.0280796	0.250189	0.106587	0.0314274	0.113241	0.312537
129804	FBLN7	0.217136	0.10391	2.08965	0.0366493	0.239641	0	4.22395	0.517643	1.72388	-1.36609	0.124179	1.68986	0.352879	0.87009	0.289506	-0.703877	0.0405183	0.300555	0.116039	0.491065	0.0282034	0.265483	0.106464	0.0316334	0.108132	0.318529
2634	GBP2	-0.223451	0.106968	-2.08895	0.0367125	0.23967	2.84291	5.1463	0.398287	-1.98821	-0.355846	0.971968	-1.69696	-1.13431	0.855814	-0.334474	-0.178276	0.319099	-0.301831	-0.375888	0.482856	0.0283008	0.250993	0.107782	0.0316364	0.109814	0.318329
23166	STAB1	-0.216782	0.103802	-2.08842	0.0367595	0.239731	0	2.46934	0.781105	-1.37202	0.785542	-1.4869	-0.94199	-1.08807	-0.22186	-0.229976	0.396614	-0.492324	-0.166893	-0.36032	-0.1241	0.028096	0.254916	0.109632	0.0313893	0.109663	0.312885
80851	SH3BP5L	-0.228074	0.109219	-2.08823	0.0367771	0.239731	4.90198	5.25773	0.385243	-0.951325	-0.137649	0.219068	-1.23968	-2.69551	-0.420748	-0.159188	-0.0688447	0.0714947	-0.219915	-0.931283	-0.235728	0.0280004	0.250148	0.10651	0.0314695	0.119366	0.313889
4520	MTF1	-0.216738	0.103812	-2.08779	0.0368171	0.239731	0	2.92357	0.711767	-1.22784	0.281413	-0.353941	-0.834873	-2.0302	-0.86697	-0.205674	0.140881	-0.115571	-0.14786	-0.685911	-0.48927	0.0280593	0.25062	0.106618	0.0313659	0.114145	0.318485
23187	PHLDB1	-0.216428	0.10367	-2.08766	0.0368284	0.239731	0	0.569812	0.989344	-1.72081	0.140662	-0.478175	-1.14114	-0.564676	-0.312194	-0.288985	0.070353	-0.156242	-0.202341	-0.185923	-0.174735	0.0282024	0.250155	0.106764	0.0314405	0.108409	0.313263
51495	HACD3	0.216502	0.103735	2.08708	0.0368813	0.239902	0	1.73474	0.884495	1.29676	1.2138	-0.250965	1.33753	0.553003	0.882008	0.217285	0.621374	-0.0819127	0.23739	0.182064	0.497923	0.0280763	0.262066	0.106531	0.0315007	0.108391	0.318698
30008	EFEMP2	-0.216431	0.10377	-2.08568	0.037008	0.240268	0	2.36238	0.797063	-1.41013	0.725362	-0.0139113	-1.4582	-1.01809	-1.01722	-0.236409	0.3657	-0.00453863	-0.25898	-0.336814	-0.576143	0.0281064	0.254179	0.106443	0.0315425	0.109447	0.320799
8292	COLQ	-0.216417	0.10381	-2.08473	0.0370934	0.240268	0	2.60841	0.760088	-2.31479	0.0862441	-0.367532	-0.268297	-1.15314	-0.228126	-0.39038	0.043127	-0.120016	-0.0474585	-0.38224	-0.127609	0.0284415	0.250058	0.106632	0.0312893	0.109877	0.312907
53340	SPA17	0.216223	0.10372	2.08469	0.0370978	0.240268	0	1.25114	0.939878	0.691869	0.557485	0.911675	1.96021	0.365461	-0.021329	0.115687	0.280106	0.299079	0.34932	0.120183	-0.0119233	0.0279589	0.252452	0.10762	0.0317572	0.108145	0.312504
152006	RNF38	0.216399	0.103788	2.08501	0.0370687	0.240268	0	2.28388	0.808631	1.58654	-0.385853	0.957487	1.70141	-0.139332	-0.36627	0.26623	-0.193377	0.314287	0.302632	-0.0457853	-0.205096	0.0281585	0.251169	0.107742	0.0316383	0.107982	0.313552
128611	ZNF831	0.216331	0.103743	2.08525	0.0370465	0.240268	0	1.94618	0.856541	1.94428	0.631615	-0.107616	1.05097	-0.0265362	0.999241	0.326983	0.317795	-0.035113	0.18628	-0.00871889	0.565698	0.0282836	0.253156	0.106459	0.0314161	0.107956	0.3205
199990	FAAP20	0.22717	0.108918	2.08569	0.037007	0.240268	4.65351	5.24403	0.38683	1.21617	-1.63285	0.829711	1.66891	0.968498	1.23375	0.203709	-0.852722	0.271932	0.296788	0.320196	0.703195	0.0280565	0.272723	0.107416	0.0316246	0.109304	0.324862
5663	PSEN1	-0.229826	0.110331	-2.08306	0.0372462	0.240951	5.9718	5.31755	0.378367	-1.80961	-0.31071	1.11592	-1.07683	-1.88858	-0.9595	-0.304066	-0.15559	0.367094	-0.190884	-0.635615	-0.542658	0.0282334	0.250757	0.108216	0.0314229	0.11327	0.319862
254225	RNF169	-0.215951	0.10371	-2.08226	0.0373186	0.240951	0	1.12926	0.951481	-1.6238	-0.891383	0.0455581	-1.40074	-0.179944	-0.193044	-0.272538	-0.45133	0.0148638	-0.248694	-0.0591358	-0.107965	0.0281703	0.256366	0.106445	0.0315221	0.108001	0.312791
313	AOAH	-0.216395	0.103952	-2.08168	0.0373722	0.240951	0	4.7452	0.44776	-0.476323	-1.64923	-1.37254	-1.87344	0.584463	-0.629687	-0.0796106	-0.862063	-0.453455	-0.333637	0.192467	-0.353763	0.0279344	0.273224	0.109148	0.0317154	0.108442	0.315629
9260	PDLIM7	-0.216269	0.103902	-2.08147	0.0373907	0.240951	0	4.1519	0.52776	-1.64824	1.44267	-0.266717	-1.31963	-1.07739	-0.84445	-0.276679	0.746004	-0.0870586	-0.234192	-0.356727	-0.476327	0.0281782	0.267391	0.106542	0.0314948	0.109629	0.318172
55321	TMEM74B	0.215834	0.10368	2.08172	0.0373676	0.240951	0	1.02149	0.960814	1.18106	-0.216082	0.367306	1.61118	0.520464	0.954862	0.197799	-0.10812	0.119942	0.286415	0.171311	0.539974	0.0280482	0.250365	0.106632	0.031601	0.108341	0.319789
126259	TMIGD2	0.216027	0.10375	2.08218	0.0373261	0.240951	0	2.31078	0.804682	1.72933	0.467046	-0.193147	0.653304	1.16544	1.2709	0.29043	0.234323	-0.0630308	0.115642	0.386389	0.725251	0.0282053	0.251716	0.106495	0.0313328	0.109919	0.32565
54894	RNF43	0.216167	0.103814	2.08224	0.0373204	0.240951	0	2.68853	0.747872	1.24605	-0.721882	0.62909	1.30429	1.68349	-0.139433	0.208741	-0.363916	0.205781	0.231451	0.563747	-0.0779641	0.0280637	0.254139	0.107	0.0314898	0.112136	0.312652
8563	THOC5	-0.216087	0.103856	-2.08065	0.0374662	0.241264	0	3.50997	0.62188	-1.03423	0.753463	0.196724	-2.22695	-0.618837	-0.905953	-0.17311	0.380118	0.0641985	-0.397737	-0.203842	-0.51172	0.0280164	0.254515	0.106497	0.0318985	0.108501	0.319046
79670	ZCCHC6	-0.216099	0.103935	-2.07917	0.0376014	0.241961	0	4.37451	0.496847	-2.16501	0.914798	0.559001	-1.64	-0.38422	-0.153745	-0.364688	0.4635	0.182753	-0.291592	-0.126364	-0.0859714	0.0283742	0.256714	0.106882	0.0316127	0.108165	0.312685
51231	VRK3	-0.235639	0.113373	-2.07844	0.0376692	0.242077	8.74231	5.47899	0.360255	-0.902004	-1.92025	-0.217109	-0.581906	-1.61936	-1.59304	-0.150911	-1.02074	-0.070855	-0.102986	-0.541486	-0.920206	0.0279915	0.282559	0.106509	0.031322	0.111813	0.333669
142891	SAMD8	-0.215619	0.103772	-2.07781	0.037727	0.242077	0	2.14458	0.8288	-0.471019	-0.85729	-1.74195	-1.41869	-0.463713	-0.492924	-0.0787235	-0.433654	-0.580018	-0.251905	-0.152575	-0.276394	0.0279339	0.255877	0.110869	0.0315284	0.108261	0.31441
83715	ESPN	0.246184	0.118478	2.07789	0.0377199	0.242077	13.4648	5.77799	0.328424	1.88525	-0.615964	0.452543	2.70635	-0.851697	0.489957	0.316931	-0.309824	0.147844	0.485652	-0.281182	0.27472	0.0282612	0.253	0.10673	0.0322019	0.108995	0.314387
9404	LPXN	0.215805	0.103853	2.07798	0.0377109	0.242077	0	4.29156	0.508246	2.0882	0.474454	0.826329	0.40501	-0.377213	1.74205	0.351547	0.238066	0.270813	0.0716544	-0.124055	1.01302	0.0283415	0.251771	0.107408	0.0313006	0.108157	0.338155
9807	IP6K1	-0.306618	0.147592	-2.07747	0.0377583	0.242101	36.4048	7.86223	0.163994	-1.64562	-0.158891	0.555659	-2.47378	-2.8553	0.426241	-0.276235	-0.0794766	0.181656	-0.442846	-0.992915	0.238819	0.0281773	0.250197	0.106877	0.0320466	0.120927	0.313926
1824	DSC2	-0.269044	0.129523	-2.07718	0.0377846	0.242101	22.8438	6.48036	0.262241	-1.42041	-0.611509	1.28891	-2.41988	-1.88754	-0.512655	-0.238143	-0.307557	0.425187	-0.432968	-0.635248	-0.287529	0.0281093	0.252956	0.108821	0.0320128	0.113264	0.314567
4713	NDUFB7	0.215824	0.103919	2.07685	0.0378156	0.242128	0	4.56739	0.470918	1.66281	0.687283	-1.29653	1.49929	0.772151	1.0575	0.279148	0.346206	-0.427758	0.266341	0.254702	0.599603	0.028183	0.253746	0.10885	0.0315576	0.108808	0.321488
55653	BCAS4	0.280828	0.135306	2.07551	0.0379394	0.242747	27.392	6.8863	0.229235	2.1597	-1.72	1.27545	1.98066	0.298424	1.46762	0.363779	-0.902739	0.420648	0.353022	0.0981091	0.84345	0.0283719	0.275467	0.108771	0.0317674	0.108081	0.330285
50861	STMN3	0.221624	0.106894	2.07331	0.0381438	0.243363	2.7921	5.14361	0.398606	2.06768	1.06715	-1.07914	0.783851	0.921116	1.29643	0.348041	0.543331	-0.354803	0.138801	0.304349	0.740451	0.028333	0.259225	0.108099	0.0313558	0.109173	0.326207
286826	LIN9	0.215103	0.103746	2.07335	0.0381395	0.243363	0	1.97265	0.852916	1.38852	0.147686	0.317895	1.79532	-0.415154	0.908334	0.23276	0.0738682	0.103784	0.319543	-0.13656	0.513093	0.0281005	0.250171	0.106584	0.0316794	0.1082	0.319082
51020	HDDC2	0.273145	0.131739	2.07338	0.0381367	0.243363	24.591	6.63051	0.249602	2.28393	1.50436	-1.30687	1.2972	1.57992	0.690001	0.38508	0.780275	-0.431246	0.230184	0.527847	0.388038	0.0284273	0.269026	0.10889	0.0314875	0.111621	0.316264
29907	SNX15	0.360324	0.173724	2.07412	0.0380679	0.243363	51.9833	10.4131	0.0643427	3.34752	0.943479	1.57486	3.19415	-1.70794	0.539219	0.570479	0.478441	0.522402	0.576533	-0.572259	0.302534	0.0290424	0.257153	0.110033	0.0325789	0.112263	0.314788
54520	CCDC93	-0.215037	0.103823	-2.07119	0.0383412	0.244012	0	4.16528	0.525873	-0.50827	-0.0599762	-0.354842	-1.36595	-1.57853	-1.92605	-0.0849547	-0.0299898	-0.115865	-0.242472	-0.527364	-1.13039	0.0279374	0.250028	0.106619	0.0315102	0.111614	0.344445
10188	TNK2	-0.214988	0.10383	-2.07057	0.038399	0.244012	0	3.12951	0.680026	-1.50527	0.0992968	-0.00315376	-1.26462	-1.75568	0.677791	-0.25248	0.0496561	-0.00102893	-0.224367	-0.588919	0.381091	0.0281337	0.250077	0.106443	0.0314772	0.112518	0.316131
64343	AZI2	-0.214831	0.10376	-2.07047	0.0384084	0.244012	0	1.94734	0.856382	-0.787062	-1.2951	-0.799626	-0.937889	-1.54074	-0.211051	-0.131636	-0.665217	-0.261987	-0.166164	-0.514327	-0.118047	0.0279726	0.263829	0.107346	0.0313884	0.111435	0.312848
55326	AGPAT5	0.214939	0.10381	2.0705	0.0384055	0.244012	0	2.6536	0.753205	0.712761	0.73174	-0.280271	1.85528	1.54129	0.030027	0.119186	0.36897	-0.0914871	0.330359	0.514518	0.0167858	0.0279617	0.254254	0.106553	0.0317069	0.111438	0.312507
26155	NOC2L	0.214846	0.103748	2.07085	0.0383725	0.244012	0	2.00622	0.848284	1.11651	0.456696	1.42973	1.36055	-0.389081	0.890446	0.18694	0.229096	0.472859	0.241506	-0.127966	0.502782	0.0280337	0.25164	0.109385	0.0315084	0.10817	0.31882
83943	IMMP2L	0.215325	0.103957	2.07129	0.0383315	0.244012	0	4.84315	0.435321	2.68761	-1.01719	0.1703	0.599222	0.347251	0.605676	0.454758	-0.51702	0.0555718	0.106055	0.114185	0.340146	0.0286305	0.258353	0.106483	0.0313245	0.108126	0.315392
58533	SNX6	-0.214503	0.103661	-2.06928	0.0385198	0.244548	0	0.511516	0.991696	-1.29875	-1.06252	-0.37984	-1.20811	-0.503131	-0.347528	-0.217621	-0.540889	-0.124043	-0.214282	-0.165587	-0.194568	0.0280768	0.259143	0.106645	0.0314599	0.108315	0.313446
116985	ARAP1	-0.214583	0.10377	-2.06787	0.0386518	0.245213	0	2.09853	0.83535	-0.509307	-0.0959293	-0.180601	-2.12441	-1.20216	-0.33929	-0.0851283	-0.0479715	-0.0589348	-0.379086	-0.398797	-0.189942	0.0279375	0.250072	0.106488	0.0318419	0.110047	0.313402
84851	TRIM52	0.300133	0.145164	2.06754	0.0386835	0.245241	35.0078	7.69323	0.173972	2.42404	-0.419439	0.881099	3.5887	-0.149022	-0.831113	0.40918	-0.210298	0.288943	0.651303	-0.0489706	-0.46867	0.0284937	0.251382	0.107541	0.0329376	0.107986	0.317991
54994	GID8	0.294399	0.142446	2.06674	0.0387582	0.245542	33.1243	7.47656	0.187541	3.67783	0.91216	-0.138186	2.03216	-0.682531	0.125855	0.629413	0.462127	-0.0450896	0.362349	-0.224946	0.0703687	0.0292879	0.256674	0.106469	0.0317934	0.10862	0.312624
9759	HDAC4	-0.366289	0.177287	-2.06608	0.0388211	0.245767	53.5353	10.7609	0.056333	-2.72698	-2.50536	-0.424245	0.24931	-2.2227	-0.142498	-0.461595	-1.39718	-0.138576	0.044099	-0.75526	-0.0796791	0.0286522	0.311004	0.106695	0.0312881	0.11546	0.312659
255520	ELMOD2	-0.21463	0.103912	-2.0655	0.0388758	0.245925	0	4.07809	0.538229	-1.58507	1.25239	-0.13728	-2.03561	-0.314378	-0.0453453	-0.26598	0.64213	-0.0447937	-0.362974	-0.10336	-0.0253494	0.028158	0.262885	0.106469	0.0317952	0.108095	0.312516
55704	CCDC88A	-0.21446	0.103858	-2.06495	0.0389282	0.245925	0	3.41377	0.636474	-1.2752	-1.29608	-1.15442	-0.309267	-1.68804	0.306592	-0.213651	-0.665748	-0.379984	-0.0547081	-0.56533	0.171592	0.0280709	0.263851	0.108342	0.0312922	0.11216	0.313236
55256	ADI1	0.214098	0.10367	2.06518	0.0389055	0.245925	0	0.932877	0.967796	1.50579	0.440892	0.953547	0.52448	0.856226	0.904773	0.252569	0.221119	0.312978	0.092811	0.282692	0.51104	0.0281339	0.251528	0.107731	0.0313142	0.109006	0.319029
54550	NECAB2	-0.214081	0.103721	-2.06401	0.0390168	0.246209	0	1.49331	0.913841	-0.58437	-0.385175	-0.924887	-1.99378	-0.163296	-0.637471	-0.0976887	-0.193036	-0.303462	-0.355395	-0.0536627	-0.358181	0.0279455	0.251164	0.107654	0.0317739	0.107992	0.315707
10614	HEXIM1	-0.378554	0.183418	-2.06389	0.0390278	0.246209	56.1164	11.3938	0.044108	-2.9781	-2.84831	0.358897	-0.726642	-2.13467	0.210602	-0.505395	-1.64836	0.117191	-0.128649	-0.723399	0.117795	0.0287993	0.334909	0.106623	0.0313452	0.11484	0.312847
7128	TNFAIP3	-0.27289	0.132293	-2.06278	0.0391336	0.246531	25.2426	6.6883	0.244873	-1.10253	-0.795533	-0.898253	-3.20447	1.03656	-0.68868	-0.18459	-0.401759	-0.294628	-0.578473	0.34301	-0.387287	0.0280307	0.255044	0.107585	0.0325877	0.109503	0.31625
23541	SEC14L2	0.21417	0.103817	2.06296	0.0391169	0.246531	0	2.8065	0.729787	1.78141	0.0274264	-0.512769	1.78888	0.491777	-0.42807	0.299273	0.0137133	-0.167584	0.318384	0.161838	-0.239848	0.0282234	0.250006	0.106812	0.0316765	0.108299	0.313938
57728	WDR19	0.227423	0.110269	2.06243	0.0391665	0.246565	5.89555	5.31325	0.378859	1.27211	-0.0483195	-0.0677792	1.37862	2.47688	-0.677436	0.213131	-0.0241606	-0.022114	0.244738	0.848794	-0.380889	0.0280701	0.250018	0.106449	0.0315145	0.117434	0.316127
197135	PATL2	-0.214181	0.103896	-2.0615	0.0392556	0.246781	0	4.7347	0.449107	-1.12487	0.473846	0.734682	-1.80766	-1.161	-1.52949	-0.188346	0.237758	0.24055	-0.321768	-0.384891	-0.881163	0.0280356	0.251767	0.107204	0.031685	0.109904	0.331911
23015	GOLGA8A	0.213813	0.103703	2.06178	0.0392291	0.246781	0	1.1359	0.950877	1.75752	0.636411	-0.0171673	1.00068	0.932573	-0.146867	0.295216	0.320239	-0.00560094	0.177331	0.308179	-0.0821235	0.028215	0.253205	0.106443	0.0314034	0.109204	0.312669
22926	ATF6	-0.213838	0.103755	-2.06099	0.0393036	0.246899	0	1.8632	0.867731	-0.924281	-1.56888	-0.487047	-1.56968	-0.186291	-0.243711	-0.154649	-0.816469	-0.15915	-0.278965	-0.0612227	-0.13634	0.0279954	0.270832	0.106776	0.0315845	0.108004	0.312965
4040	LRP6	0.213973	0.103834	2.06073	0.0393293	0.246899	0	3.2801	0.656889	1.59514	0.532259	-0.982765	1.64757	0.469116	0.893608	0.267686	0.267315	-0.322689	0.292951	0.154359	0.504604	0.0281612	0.252233	0.107813	0.0316158	0.108268	0.318866
9034	CCRL2	-0.283071	0.137408	-2.06007	0.0393919	0.246948	29.0015	7.0424	0.217506	-0.753966	-0.823991	-2.27895	-0.00172244	-2.16654	-0.671449	-0.12609	-0.416437	-0.770306	-0.000304636	-0.734903	-0.377485	0.0279676	0.255419	0.11425	0.0312805	0.115061	0.316062
5441	POLR2L	0.214141	0.10394	2.06025	0.039375	0.246948	0	4.51593	0.477755	1.97606	-0.180526	-1.08499	1.86073	0.428429	-0.00940777	0.332401	-0.090309	-0.356757	0.331342	0.140937	-0.00525911	0.028296	0.250255	0.108117	0.0317094	0.108216	0.312501
2184	FAH	-0.30724	0.149216	-2.05903	0.0394917	0.247356	37.5647	8.00829	0.155779	-2.80249	1.01137	-0.647056	-0.600978	-2.63709	-0.565847	-0.474729	0.513964	-0.211689	-0.106366	-0.909042	-0.317592	0.0286949	0.258255	0.107032	0.0313247	0.118828	0.315022
10800	CYSLTR1	-0.213795	0.10385	-2.0587	0.0395227	0.247356	0	3.28986	0.655394	-0.737779	-1.88518	-0.533666	-1.4461	-0.936292	0.421023	-0.123377	-0.999738	-0.174438	-0.256813	-0.309422	0.235882	0.0279652	0.281234	0.106843	0.0315382	0.109214	0.313891
54940	OCIAD1	0.213856	0.103888	2.05853	0.0395396	0.247356	0	4.20152	0.520782	1.99041	0.966293	0.785321	1.24088	-0.461775	-1.08344	0.334849	0.490353	0.257261	0.220128	-0.151936	-0.61475	0.0283017	0.257514	0.107313	0.0314698	0.108258	0.321948
23670	TMEM2	-0.290666	0.141239	-2.05797	0.0395926	0.247516	31.9482	7.34735	0.196062	-1.14297	0.702967	-1.89984	-1.78429	-0.0820202	-2.39223	-0.19139	0.354229	-0.635098	-0.317555	-0.0269501	-1.44462	0.0280396	0.253921	0.11175	0.0316745	0.107964	0.364673
6745	SSR1	-0.213341	0.103734	-2.05661	0.0397234	0.248092	0	1.65025	0.895107	-1.32113	0.154171	-1.16215	-0.891095	-1.37893	0.254252	-0.221393	0.0771141	-0.382574	-0.157847	-0.458845	0.142246	0.0280826	0.250186	0.108368	0.0313779	0.110725	0.313006
50808	AK3	0.213315	0.10373	2.05644	0.03974	0.248092	0	1.63249	0.897293	0.369305	0.731399	0.953807	1.47718	1.37645	0.451324	0.0617144	0.368795	0.313064	0.262379	0.457996	0.252943	0.0279256	0.25425	0.107732	0.0315495	0.110715	0.314099
10335	MRVI1	-0.30062	0.146401	-2.0534	0.0400336	0.249284	35.8392	7.79292	0.168024	-2.89671	-0.752038	0.810232	-2.16749	0.2343	-1.95662	-0.491161	-0.379387	0.265492	-0.386915	0.0770104	-1.15021	0.02875	0.254498	0.10737	0.0318653	0.108033	0.345574
2994	GYPB	0.226448	0.110284	2.05332	0.0400417	0.249284	5.9592	5.31684	0.378448	0.554339	0.546948	1.27834	2.73461	-0.495945	-0.459528	0.0926629	0.274761	0.421623	0.490873	-0.163214	-0.257564	0.0279422	0.252359	0.108782	0.0322218	0.108305	0.314158
51026	GOLT1B	0.215014	0.104686	2.05389	0.0399868	0.249284	0.684041	5.03444	0.411692	0.898264	-0.391905	1.0505	2.50839	-0.878181	0.45534	0.150284	-0.196425	0.345245	0.449196	-0.290014	0.255205	0.0279908	0.251206	0.108011	0.0320687	0.109061	0.314128
55080	TAPBPL	0.213188	0.103789	2.05405	0.039971	0.249284	0	2.59469	0.762172	1.73815	-0.246786	0.926048	0.75975	1.34798	-0.692763	0.291928	-0.12351	0.303847	0.134524	0.448288	-0.389611	0.0282083	0.250477	0.107657	0.0313512	0.110599	0.316295
1031	CDKN2C	-0.244512	0.119099	-2.05301	0.0400715	0.249297	13.9608	5.81131	0.325015	-2.29968	-1.29808	1.32236	-1.50873	-0.544281	-0.771685	-0.387785	-0.666832	0.436479	-0.268033	-0.179181	-0.434633	0.0284345	0.263896	0.108949	0.0315612	0.108377	0.317223
56904	SH3GLB2	0.322614	0.15717	2.05264	0.0401074	0.249348	42.8792	8.75338	0.119315	3.91189	2.00858	0.0325296	0.977221	0.0576783	0.0604032	0.671647	1.07429	0.010613	0.173158	0.0189514	0.033768	0.0294787	0.286066	0.106444	0.0313977	0.107959	0.312529
1436	CSF1R	-0.213112	0.10393	-2.05052	0.0403135	0.250456	0	4.80965	0.43955	-0.799424	0.0420591	-2.19582	-1.39554	-0.793451	0.987288	-0.133708	0.0210301	-0.740264	-0.247763	-0.261786	0.558761	0.0279745	0.250014	0.113653	0.0315203	0.108856	0.320305
394	ARHGAP5	-0.212882	0.103884	-2.04923	0.0404395	0.251044	0	3.93005	0.559531	-1.65495	-1.47365	-0.511154	-0.315433	-1.58222	0.595556	-0.277817	-0.763178	-0.167054	-0.0557994	-0.528639	0.334412	0.0281804	0.268201	0.10681	0.0312927	0.111632	0.315296
57179	KIAA1191	-0.333475	0.162768	-2.04878	0.0404837	0.251044	46.1095	9.27807	0.0984739	-3.15127	-0.362988	0.348754	-0.682479	-3.00932	-0.125046	-0.535801	-0.181869	0.113874	-0.120815	-1.05351	-0.0699164	0.0289092	0.251034	0.106613	0.0313376	0.122558	0.312622
400745	SH2D5	0.212464	0.103707	2.0487	0.0404918	0.251044	0	1.47744	0.915658	1.72325	0.189466	-0.0525292	0.742767	1.21802	0.794409	0.289399	0.0947864	-0.0171382	0.13151	0.404162	0.447633	0.0282032	0.250281	0.106446	0.0313481	0.110104	0.317509
5236	PGM1	-0.212873	0.103944	-2.04797	0.0405634	0.251276	0	4.80355	0.440323	-0.541994	-0.0404987	0.761805	-2.54022	-1.08981	-0.693961	-0.0905972	-0.0202499	0.249497	-0.455042	-0.360903	-0.390293	0.0279409	0.250013	0.107262	0.0320894	0.109668	0.316308
9334	B4GALT5	-0.245635	0.119981	-2.04727	0.0406313	0.251276	14.7818	5.86729	0.319347	-2.56059	0.375902	0.530715	-0.569221	-1.89231	-0.913388	-0.432752	0.188367	0.17347	-0.100738	-0.636933	-0.516009	0.0285626	0.251109	0.106839	0.0313202	0.113292	0.319157
26190	FBXW2	-0.212588	0.103841	-2.04724	0.0406347	0.251276	0	3.56485	0.613598	-1.38016	-0.27072	0.476169	-0.859907	-1.97458	-0.955392	-0.23135	-0.135515	0.155585	-0.152306	-0.666086	-0.54028	0.0280982	0.250574	0.106761	0.0313712	0.113792	0.319798
51284	TLR7	-0.212802	0.103949	-2.04717	0.0406411	0.251276	0	4.82344	0.437806	-0.99849	-0.912906	-1.94102	-1.63065	0.700542	0.51639	-0.167107	-0.462515	-0.649573	-0.289911	0.23092	0.289638	0.0280093	0.256685	0.111994	0.0316089	0.108656	0.314597
5165	PDK3	-0.212272	0.103731	-2.04638	0.0407191	0.251586	0	1.75413	0.882011	-1.87566	-0.224878	-0.365525	-0.956198	-0.929364	0.679331	-0.315298	-0.112528	-0.11936	-0.169419	-0.307106	0.381968	0.0282576	0.250396	0.10663	0.0313927	0.109196	0.316147
9159	PCSK7	0.212039	0.103669	2.04535	0.0408204	0.252039	0	0.742431	0.980559	1.63943	0.513351	0.646032	1.16858	-0.122917	0.420203	0.275187	0.257739	0.211353	0.207233	-0.0403903	0.235421	0.0281753	0.252076	0.10703	0.0314483	0.107976	0.313886
79957	PAQR6	-0.306611	0.14993	-2.04503	0.0408518	0.252059	38.0586	8.07215	0.152304	-2.33532	-1.92245	0.985313	-2.67988	0.145628	-1.08132	-0.393909	-1.02206	0.323537	-0.480763	0.0478548	-0.613507	0.0284512	0.282644	0.10782	0.0321834	0.107985	0.32191
138428	PTRH1	0.21212	0.103757	2.04439	0.040915	0.252276	0	2.13243	0.830534	1.48833	0.967076	-0.459022	1.55599	0.0954548	0.721594	0.249617	0.490763	-0.149966	0.276507	0.0313649	0.406035	0.0281287	0.257526	0.106738	0.0315792	0.107967	0.316622
10613	ERLIN1	-0.21216	0.103808	-2.04378	0.0409755	0.252476	0	3.22543	0.665276	-0.642969	0.60257	-0.214042	-2.10627	-0.801468	-1.22533	-0.107498	0.303009	-0.0698535	-0.375791	-0.264454	-0.698209	0.0279525	0.252869	0.106507	0.0318322	0.108875	0.324687
64326	COP1	-0.212353	0.103953	-2.04278	0.0410746	0.252741	0	4.88646	0.429893	-2.43304	-0.0861506	0.820367	-1.46188	-0.108818	0.557107	-0.41073	-0.0430803	0.268842	-0.259639	-0.0357564	0.312648	0.0284981	0.250058	0.107394	0.0315439	0.107971	0.314944
51562	MBIP	0.21186	0.103711	2.04279	0.0410729	0.252741	0	1.50407	0.9126	0.722835	-0.232829	1.26309	1.28517	1.17745	0.683316	0.120874	-0.116513	0.416483	0.228037	0.390447	0.384234	0.0279631	0.250424	0.108725	0.0314837	0.10996	0.316191
85329	LGALS12	-0.211918	0.103821	-2.0412	0.0412314	0.253532	0	2.96433	0.705485	-0.622338	-0.653601	0.0297266	-2.45559	-0.0195607	-0.533975	-0.104044	-0.329004	0.00969852	-0.43951	-0.00642698	-0.29957	0.02795	0.253383	0.106444	0.0320351	0.107955	0.314744
25926	NOL11	0.211759	0.103777	2.04052	0.0412982	0.253769	0	2.63456	0.756107	2.07147	-0.379035	0.578455	0.950561	-0.273113	1.02512	0.348688	-0.189944	0.189141	0.168417	-0.0897792	0.58074	0.0283346	0.251127	0.106913	0.0313913	0.108061	0.320931
3344	FOXN2	-0.211479	0.103675	-2.03982	0.0413678	0.254024	0	0.835979	0.974682	-1.38188	-0.630305	-0.398382	-0.831971	-1.35165	-0.110188	-0.23164	-0.317127	-0.13011	-0.147344	-0.44954	-0.0616062	0.0280987	0.253143	0.106665	0.0313654	0.110614	0.312595
29094	LGALSL	-0.346265	0.169785	-2.03944	0.0414062	0.254086	50.2282	10.0459	0.0739463	-4.19028	-0.637005	0.840173	-2.62105	0.161626	-1.28481	-0.722439	-0.320541	0.275393	-0.469915	0.0531138	-0.733524	0.0297246	0.253211	0.10744	0.0321431	0.107992	0.325951
10564	ARFGEF2	0.211615	0.103799	2.0387	0.0414798	0.254364	0	2.84229	0.724284	0.427232	1.52228	1.22272	1.49358	0.165458	0.863451	0.0714002	0.790293	0.402901	0.265317	0.0543736	0.487246	0.0279301	0.269518	0.108578	0.0315555	0.107993	0.318435
689	BTF3	0.21167	0.103849	2.03825	0.0415248	0.254466	0	3.48884	0.625077	1.7874	-0.257136	0.375024	1.72864	-0.866392	0.709164	0.300292	-0.128701	0.122467	0.307532	-0.286082	0.398951	0.0282255	0.250518	0.10664	0.03165	0.109031	0.316479
8942	KYNU	-0.21175	0.10396	-2.03684	0.0416663	0.25516	0	4.90993	0.426971	0.174715	-0.357152	-0.739956	-2.84198	-0.44502	-0.279502	0.0291911	-0.178933	-0.242289	-0.510764	-0.146409	-0.156399	0.0279153	0.251001	0.107215	0.0322996	0.108237	0.313112
4599	MX1	-0.253975	0.124755	-2.03578	0.0417721	0.255474	18.8868	6.16423	0.290565	-2.47636	-1.42922	-1.32631	-0.772678	-0.281617	1.38918	-0.418201	-0.73857	-0.437813	-0.136818	-0.0925776	0.796014	0.0285197	0.267046	0.108965	0.0313537	0.108067	0.328341
6911	TBX6	0.211267	0.103778	2.03576	0.0417743	0.255474	0	2.32973	0.801891	1.72337	-0.377185	0.453276	1.73584	-0.13271	-0.354378	0.289419	-0.189013	0.148084	0.308829	-0.0436088	-0.198415	0.0282032	0.251116	0.106731	0.0316531	0.10798	0.313484
7011	TEP1	-0.211032	0.103748	-2.03407	0.0419443	0.256256	0	1.98697	0.850945	-1.33813	-0.879056	-0.0916156	-1.77696	-0.219539	0.589004	-0.22426	-0.444933	-0.0298917	-0.316234	-0.0721554	0.330701	0.028087	0.256186	0.106454	0.0316712	0.108023	0.315234
25915	NDUFAF3	0.355325	0.174699	2.03392	0.0419593	0.256256	52.5075	10.528	0.0615852	4.20177	2.10386	-0.762084	1.65091	0.374973	0.341083	0.724549	1.13322	-0.249589	0.293551	0.123317	0.190949	0.0297352	0.290131	0.107262	0.0316172	0.108155	0.313412
3927	LASP1	-0.211286	0.103947	-2.03262	0.0420905	0.256392	0	4.76394	0.445364	-0.590399	0.473823	0.33947	-2.42278	-1.52757	0.0621703	-0.0986977	0.237747	0.110838	-0.433498	-0.509792	0.0347559	0.0279462	0.251766	0.106604	0.0320146	0.111374	0.31253
8737	RIPK1	-0.211114	0.103879	-2.03232	0.0421217	0.256392	0	3.88563	0.565998	-1.58449	0.707926	-1.05687	-0.353296	-1.90439	-0.368331	-0.265882	0.356768	-0.347373	-0.0625003	-0.641201	-0.206253	0.0281578	0.253978	0.10803	0.0312958	0.113364	0.313564
9325	TRIP4	-0.211082	0.103863	-2.0323	0.0421233	0.256392	0	3.7663	0.583529	-1.95059	0.930209	-0.914174	-1.02848	-0.855458	0.775346	-0.328059	0.471523	-0.299908	-0.182278	-0.282436	0.436726	0.0282861	0.256948	0.107626	0.0314103	0.109004	0.317268
10875	FGL2	-0.230876	0.113607	-2.03224	0.0421294	0.256392	9.07339	5.49894	0.358062	-1.92284	-0.426933	-0.17913	-1.68594	-1.00645	1.76705	-0.323331	-0.214077	-0.0584545	-0.299849	-0.332909	1.02878	0.0282754	0.251432	0.106488	0.0316318	0.109413	0.33896
79712	GTDC1	-0.210825	0.103757	-2.03191	0.0421631	0.256392	0	3.25562	0.660643	-1.64683	0.326669	-0.285643	-0.929181	-0.366297	-1.86718	-0.276441	0.163608	-0.0932425	-0.164616	-0.120458	-1.09248	0.0281777	0.250836	0.106557	0.0313864	0.108145	0.342338
3308	HSPA4	-0.210779	0.103744	-2.03172	0.0421825	0.256392	0	1.87067	0.866735	-0.778491	0.231563	-1.68838	-1.30166	-0.869834	-0.193108	-0.130199	0.115879	-0.561474	-0.230982	-0.28723	-0.108001	0.0279712	0.25042	0.110591	0.031489	0.10904	0.312792
837	CASP4	-0.32473	0.159849	-2.03148	0.042206	0.256392	44.5426	9.01592	0.108431	-3.22618	0.112409	1.32954	-2.94418	-0.955977	-1.31199	-0.549009	0.0562158	0.438903	-0.529762	-0.316006	-0.749733	0.028959	0.250099	0.108977	0.0323768	0.109268	0.326552
3480	IGF1R	-0.273181	0.134476	-2.03145	0.0422095	0.256392	27.0366	6.85276	0.231823	-1.32043	0.598023	0.396758	-3.28378	-0.529168	-1.35631	-0.221276	0.300696	0.129579	-0.593412	-0.174187	-0.776259	0.0280824	0.252826	0.106664	0.0326561	0.108354	0.327564
79630	C1orf54	-0.210839	0.103833	-2.03056	0.0422994	0.256709	0	3.27877	0.657094	-2.09803	-0.329687	-0.792908	-0.17057	-1.36967	0.598119	-0.353227	-0.165124	-0.259767	-0.0301693	-0.455684	0.335864	0.0283456	0.250852	0.10733	0.0312841	0.110687	0.31532
23276	KLHL18	-0.210557	0.103704	-2.03037	0.0423188	0.256709	0	1.26019	0.938974	-0.706454	-0.316075	-1.06572	-1.88985	-0.149379	-0.23239	-0.11813	-0.158285	-0.350325	-0.336601	-0.0490878	-0.129998	0.0279608	0.250783	0.108057	0.0317231	0.107986	0.312922
79581	SLC52A2	-0.279654	0.137832	-2.02894	0.042464	0.257088	29.5573	7.09797	0.213456	-0.84982	0.170017	-1.28801	-3.16873	-1.18369	1.24172	-0.142158	0.085047	-0.424884	-0.571757	-0.392555	0.707922	0.0279826	0.250226	0.108818	0.0325575	0.109982	0.325029
5230	PGK1	-0.259029	0.127668	-2.02893	0.0424659	0.257088	21.3851	6.36012	0.272738	-0.749288	0.0994422	0.731634	-2.58054	-1.94011	-1.05694	-0.125306	0.0497288	0.239545	-0.462456	-0.653849	-0.599276	0.0279669	0.250077	0.107198	0.032116	0.11358	0.321478
118429	ANTXR2	-0.333411	0.16433	-2.02891	0.042467	0.257088	47.1866	9.4673	0.0918152	-1.88986	-0.48299	1.18217	-3.85752	-0.84755	-1.41405	-0.317715	-0.24238	0.389285	-0.702991	-0.2798	-0.811008	0.0282629	0.251836	0.108437	0.033211	0.108985	0.328943
57655	GRAMD1A	-0.210594	0.103831	-2.02824	0.0425356	0.25733	0	3.32211	0.650458	-1.64426	1.15298	-1.17356	-1.15607	-0.152801	-0.815987	-0.276005	0.58885	-0.386398	-0.205001	-0.0502127	-0.459995	0.0281769	0.260836	0.108407	0.0314447	0.107988	0.31779
7633	ZNF79	-0.210557	0.103854	-2.02742	0.0426195	0.257425	0	3.42718	0.634434	-2.03855	0.800108	-0.677101	-1.4597	0.38397	0.0715693	-0.343065	0.404117	-0.221577	-0.259248	0.126282	0.040011	0.028321	0.255103	0.107089	0.0315431	0.108164	0.31254
23078	VWA8	-0.210175	0.103673	-2.02729	0.0426324	0.257425	0	0.834191	0.974801	-1.7002	-0.162627	-1.02623	-0.616211	-0.763985	-0.102249	-0.285488	-0.0813473	-0.337158	-0.109066	-0.251988	-0.0571663	0.0281954	0.250207	0.107938	0.031327	0.10879	0.312582
2549	GAB1	-0.210454	0.103833	-2.02685	0.0426782	0.257425	0	3.73113	0.588738	-1.79743	-0.728087	-0.940464	0.253585	-1.23895	-1.26278	-0.301995	-0.367097	-0.308633	0.0448555	-0.411248	-0.72042	0.0282291	0.254211	0.107696	0.0312884	0.11018	0.325475
22834	ZNF652	-0.21019	0.103711	-2.02669	0.0426944	0.257425	0	1.40807	0.923429	-1.80502	-0.151726	-0.929508	-0.361795	-1.10121	-0.163865	-0.303285	-0.0758904	-0.304995	-0.0640046	-0.364741	-0.0916339	0.0282318	0.25018	0.107667	0.0312965	0.109705	0.31271
2999	GZMH	0.210504	0.103849	2.02703	0.0426594	0.257425	0	3.38599	0.640705	0.923569	1.92482	0.822249	0.807979	1.24399	-0.245973	0.15453	1.02348	0.269464	0.143084	0.412955	-0.137607	0.0279953	0.282735	0.107398	0.0313605	0.110198	0.312973
284349	ZNF283	0.209978	0.10367	2.02546	0.0428201	0.258011	0	1.39733	0.924606	1.07133	0.88443	0.48687	1.23924	0.19573	1.32619	0.179345	0.447721	0.159092	0.219836	0.0643262	0.758219	0.0280241	0.256264	0.106776	0.0314693	0.108009	0.326872
55937	APOM	0.210137	0.103839	2.02367	0.0430037	0.258943	0	3.62499	0.604565	1.40216	-0.116244	0.269109	2.11573	0.187661	-1.07552	0.235062	-0.0581342	0.0878402	0.377509	0.0616731	-0.610122	0.0281042	0.250106	0.106544	0.0318372	0.108005	0.321806
10643	IGF2BP3	-0.210051	0.10384	-2.02284	0.0430892	0.259116	0	3.90309	0.563452	-1.49218	0.225329	0.793648	-1.74131	-0.419452	-1.371	-0.250268	0.112754	0.260012	-0.309813	-0.137977	-0.785078	0.0281299	0.250397	0.107332	0.0316555	0.108205	0.327909
64386	MMP25	-0.32245	0.159416	-2.02269	0.0431054	0.259116	44.2601	8.97024	0.110257	-1.48533	0.55373	0.738353	-3.60141	-1.66073	-1.39056	-0.24911	0.278201	0.24176	-0.653732	-0.555834	-0.796846	0.0281279	0.252419	0.107212	0.0329499	0.11202	0.328374
3482	IGF2R	-0.210185	0.103933	-2.02231	0.0431444	0.259116	0	4.8108	0.439404	-1.49047	0.955257	0.806451	-1.86439	-1.00313	-0.796196	-0.249979	0.484588	0.264242	-0.332004	-0.331796	-0.448656	0.0281294	0.257338	0.107361	0.0317111	0.109403	0.317532
55128	TRIM68	0.209674	0.103696	2.022	0.0431764	0.259116	0	1.22556	0.942402	1.46547	0.554673	1.07659	1.2475	0.00859917	-0.378717	0.245753	0.278679	0.353952	0.22131	0.00282538	-0.21209	0.0281221	0.252427	0.108091	0.0314719	0.107955	0.313625
10780	ZNF234	0.209782	0.103746	2.02208	0.0431683	0.259116	0	1.94226	0.857075	1.31399	-0.467011	1.4519	1.35437	-0.0369769	0.377762	0.220189	-0.234305	0.480399	0.2404	-0.0121494	0.211553	0.0280807	0.251716	0.109479	0.0315063	0.107956	0.313619
55147	RBM23	-0.210094	0.103924	-2.02162	0.0432155	0.259178	0	4.48756	0.48155	-0.737063	0.450416	0.393465	-2.2625	-1.59085	0.15446	-0.123257	0.225925	0.128501	-0.404215	-0.531622	0.0863713	0.0279651	0.251595	0.10666	0.0319188	0.111673	0.312686
23528	ZNF281	-0.209759	0.103802	-2.02077	0.043304	0.259179	0	3.57847	0.611549	-0.686967	-0.455692	-1.54067	-0.509746	-1.42483	-1.52274	-0.114866	-0.228589	-0.51069	-0.0902011	-0.47453	-0.877036	0.0279582	0.251633	0.109874	0.0313123	0.110917	0.33173
11145	PLA2G16	-0.209612	0.103737	-2.02061	0.0433203	0.259179	0	1.97421	0.852702	-1.3589	-1.01315	0.248926	-1.58231	0.0511789	-0.784648	-0.227764	-0.514903	0.0812466	-0.281231	0.0168158	-0.442047	0.0280925	0.258285	0.106529	0.0315895	0.107958	0.317385
64757	2019-03-01	-0.209465	0.103672	-2.02045	0.043337	0.259179	0	0.941293	0.967161	-1.36283	-0.0158118	-0.175691	-1.05106	-1.35604	-0.437605	-0.228426	-0.00790595	-0.0573319	-0.186297	-0.451036	-0.245217	0.0280936	0.250002	0.106486	0.0314161	0.110631	0.314003
55754	TMEM30A	-0.245043	0.121301	-2.02013	0.0433696	0.259179	15.9019	5.94544	0.311565	-1.8765	0.467066	1.12899	-2.01518	-1.70924	-0.504973	-0.315441	0.234333	0.371467	-0.359271	-0.572711	-0.283193	0.0282579	0.251716	0.108258	0.0317848	0.11227	0.314505
55625	ZDHHC7	-0.209383	0.103674	-2.01963	0.0434222	0.259179	0	0.896244	0.970493	-1.40527	-0.610083	-1.06772	-0.595311	-1.06427	-0.0327314	-0.235587	-0.306831	-0.350992	-0.105361	-0.352316	-0.0182976	0.0281051	0.252942	0.108064	0.0313239	0.109588	0.312508
2203	FBP1	-0.209594	0.103821	-2.01881	0.043507	0.259179	0	3.01607	0.697509	-0.584586	-0.395849	-0.0054495	-2.43739	-0.718624	0.368664	-0.0977247	-0.198411	-0.00177793	-0.436175	-0.236921	0.20644	0.0279455	0.25123	0.106443	0.0320237	0.108693	0.313565
9343	EFTUD2	-0.209666	0.103872	-2.01851	0.0435385	0.259179	0	4.27196	0.510961	-1.05885	0.248018	-1.71033	-1.4433	-0.817119	1.21969	-0.177248	0.124128	-0.569063	-0.256311	-0.269663	0.694869	0.0280215	0.250481	0.110704	0.0315372	0.108911	0.324571
4494	MT1F	-0.209567	0.103859	-2.01781	0.0436116	0.259179	0	3.68887	0.595021	-1.37707	-1.83263	-0.930558	-1.07228	-0.033918	0.699054	-0.230829	-0.968549	-0.305344	-0.190075	-0.0111443	0.393192	0.0280974	0.279315	0.107669	0.0314217	0.107956	0.316365
5371	PML	-0.20943	0.103805	-2.01754	0.0436388	0.259179	0	2.94444	0.708552	-1.67578	-1.03996	-0.586829	-1.44119	0.387502	0.744053	-0.281347	-0.528995	-0.191891	-0.255934	0.127445	0.418847	0.0281872	0.258745	0.106927	0.0315364	0.108168	0.316886
11213	IRAK3	-0.209205	0.103739	-2.01664	0.0437334	0.259179	0	2.62127	0.758131	-1.26007	-0.853965	0.277444	-1.41061	-0.16903	-1.50853	-0.211103	-0.431933	0.0905634	-0.250461	-0.0555475	-0.868359	0.0280671	0.25583	0.10655	0.0315256	0.107995	0.331351
89849	ATG16L2	-0.209321	0.103871	-2.0152	0.0438838	0.259179	0	3.79208	0.579722	-1.66466	0.415735	0.546527	-2.07962	0.185976	-0.501067	-0.279463	0.208431	0.178659	-0.370955	0.0611191	-0.280988	0.0281836	0.251358	0.106863	0.0318181	0.108004	0.314474
6804	STX1A	-0.209032	0.103741	-2.01494	0.0439107	0.259179	0	2.16749	0.825517	-1.33471	-1.60208	-0.281537	-0.683592	-0.650874	-0.953507	-0.223683	-0.835235	-0.0919008	-0.121013	-0.214453	-0.53919	0.0280861	0.271801	0.106554	0.0313378	0.10856	0.319768
30011	SH3KBP1	-0.209096	0.103788	-2.01465	0.0439415	0.259179	0	2.76582	0.736034	-0.692613	-0.337216	-0.375031	-1.98792	-1.22868	0.793153	-0.115811	-0.168909	-0.122469	-0.354335	-0.40777	0.446914	0.027959	0.250892	0.10664	0.031771	0.110142	0.317493
10857	PGRMC1	-0.208884	0.10373	-2.01374	0.0440369	0.259179	0	1.70389	0.88841	-1.94122	-0.585093	0.347359	-0.895828	-0.847708	-0.0812964	-0.326462	-0.294124	0.113418	-0.158688	-0.279853	-0.0454498	0.0282824	0.252703	0.106612	0.0313789	0.108985	0.312552
6733	SRPK2	-0.209092	0.103836	-2.01367	0.0440437	0.259179	0	3.30969	0.652359	-1.17038	-0.473508	0.404408	-2.2868	-0.286212	0.543713	-0.196003	-0.237588	0.132083	-0.408647	-0.0940899	0.305074	0.0280458	0.251764	0.106672	0.0319329	0.108071	0.314827
8402	SLC25A11	-0.209021	0.103818	-2.01334	0.0440792	0.259179	0	2.97888	0.703242	-1.88285	0.160662	0.721436	-1.67422	-0.298507	-0.221142	-0.316521	0.0803634	0.236182	-0.297742	-0.0981365	-0.123698	0.0282603	0.250202	0.107177	0.0316268	0.108081	0.312883
2857	GPR34	-0.255362	0.126867	-2.01283	0.0441321	0.259179	20.5842	6.29598	0.278475	-0.55846	-1.22519	-2.38751	-1.97551	0.0209171	0.65654	-0.0933525	-0.627487	-0.809902	-0.35209	0.00687262	0.369011	0.0279426	0.262304	0.115073	0.0317648	0.107955	0.315904
23250	ATP11A	-0.208824	0.10378	-2.01219	0.0441998	0.259179	0	2.83396	0.725565	-1.47209	-0.435321	-0.474025	-0.203593	-1.81053	-0.991039	-0.246872	-0.218308	-0.154882	-0.0360111	-0.608135	-0.560937	0.028124	0.251489	0.106758	0.0312856	0.112821	0.320366
147699	PPM1N	-0.234974	0.116809	-2.01161	0.0442614	0.259179	11.8683	5.67333	0.339314	-1.66094	-1.96691	-0.77921	0.275626	-1.43958	-0.845501	-0.278831	-1.0489	-0.255243	0.0487552	-0.47958	-0.476931	0.0281823	0.284381	0.1073	0.0312898	0.110981	0.318187
197259	MLKL	-0.208654	0.103738	-2.01136	0.0442879	0.259179	0	2.03219	0.844673	-1.19845	0.637795	-0.169179	-1.34717	-1.37	-0.717138	-0.200726	0.320944	-0.0552058	-0.239113	-0.455798	-0.403495	0.0280523	0.253219	0.106483	0.0315039	0.110688	0.31657
3084	NRG1	-0.208847	0.103857	-2.01091	0.0443351	0.259179	0	3.53001	0.618852	-2.31065	0.595741	0.308489	-1.3299	-0.0248512	-0.123845	-0.389669	0.299536	0.100709	-0.236026	-0.00816525	-0.0692447	0.0284396	0.252804	0.106576	0.0314982	0.107955	0.31262
63874	ABHD4	-0.208581	0.103748	-2.01046	0.0443824	0.259179	0	1.99925	0.849248	-0.526548	-1.01433	-0.127842	-1.67986	-1.36815	-0.158004	-0.0880127	-0.515522	-0.0417138	-0.298757	-0.455166	-0.0883544	0.0279393	0.258305	0.106465	0.0316292	0.110681	0.312695
5894	RAF1	-0.208622	0.103781	-2.01021	0.044409	0.259179	0	2.67606	0.749778	-1.43784	-0.204327	0.829552	-1.68956	-0.664199	-0.789902	-0.241086	-0.10223	0.271879	-0.300501	-0.218868	-0.445053	0.0281142	0.250327	0.107415	0.0316333	0.108585	0.317452
64422	ATG3	-0.208709	0.103834	-2.01002	0.0444287	0.259179	0	3.54203	0.617038	-1.92234	0.696681	-0.912574	-0.17376	-1.30404	-0.915398	-0.323246	0.351013	-0.299377	-0.0307336	-0.433337	-0.517169	0.0282752	0.25385	0.107622	0.0312842	0.110425	0.319187
11138	TBC1D8	-0.208794	0.103919	-2.00919	0.0445165	0.259179	0	4.76302	0.445481	-1.32108	-0.606337	1.14286	-1.22611	-1.76753	-0.867953	-0.221384	-0.304925	0.37611	-0.217493	-0.593066	-0.489835	0.0280826	0.252906	0.108304	0.0314653	0.112583	0.318498
5579	PRKCB	-0.208584	0.103824	-2.00902	0.0445353	0.259179	0	3.06217	0.690401	-0.818418	-0.367309	-0.993778	-2.22974	0.577899	0.0173892	-0.136892	-0.184043	-0.326353	-0.398244	0.190296	0.0097209	0.0279775	0.251058	0.107844	0.0319001	0.108431	0.312502
163590	TOR1AIP2	-0.242428	0.120677	-2.00891	0.0445468	0.259179	15.2766	5.90156	0.315916	-1.17279	-0.627003	-0.969447	-0.0439623	-2.70764	-0.555011	-0.196408	-0.315445	-0.318261	-0.00777534	-0.93592	-0.311462	0.0280463	0.25311	0.107775	0.0312808	0.11948	0.314925
55793	MINDY1	-0.297633	0.148165	-2.0088	0.0445589	0.259179	36.8063	7.91218	0.161142	-1.97944	0.535234	0.697637	-2.03393	-2.83324	-0.457963	-0.332977	0.268823	0.22834	-0.362669	-0.984336	-0.256683	0.0282974	0.252258	0.107129	0.0317943	0.120703	0.314147
317662	FAM149B1	-0.208158	0.103663	-2.00804	0.0446393	0.259179	0	1.38723	0.925706	-0.956702	0.0512055	-0.788439	-1.0651	-1.00341	-1.31858	-0.160091	0.0256038	-0.258291	-0.188795	-0.331889	-0.753667	0.0280014	0.25002	0.10732	0.0314198	0.109404	0.3267
10295	BCKDK	-0.208298	0.103739	-2.00791	0.0446529	0.259179	0	1.87078	0.866721	-0.478027	0.0567207	-0.861341	-1.83715	-1.24549	0.0497203	-0.0798956	0.0283618	-0.282399	-0.327088	-0.413465	0.0277953	0.0279345	0.250025	0.107492	0.0316985	0.110204	0.312519
124808	CCDC43	0.208137	0.10366	2.00788	0.0446562	0.259179	0	0.759146	0.979566	1.52602	0.567066	0.613597	0.58796	1.16665	0.239115	0.255988	0.284968	0.200687	0.104059	0.386797	0.133765	0.0281399	0.252538	0.106973	0.0313228	0.109923	0.312947
10125	RASGRP1	0.208513	0.103844	2.00795	0.0446488	0.259179	0	3.79692	0.579009	1.75319	-1.31108	0.66155	1.03196	0.540975	1.11396	0.294481	-0.673891	0.216458	0.182897	0.178088	0.632614	0.0282135	0.264192	0.107059	0.0314112	0.108372	0.322505
55153	SDAD1	0.208261	0.103718	2.00795	0.0446482	0.259179	0	2.15419	0.827425	1.23652	0.146156	0.501158	1.5941	-0.363518	1.30816	0.207137	0.0731022	0.163776	0.283346	-0.119543	0.747445	0.0280614	0.250167	0.106796	0.0315942	0.108143	0.326467
202915	TMEM184A	0.208401	0.10377	2.0083	0.0446115	0.259179	0	2.4903	0.777955	1.50285	-0.552925	1.67151	0.740965	0.334921	0.710027	0.252071	-0.277793	0.555649	0.13119	0.110124	0.399443	0.028133	0.252412	0.110505	0.0313478	0.108114	0.316489
89870	TRIM15	0.208307	0.103673	2.00927	0.044509	0.259179	0	0.982708	0.963948	0.797705	0.820168	1.2647	1.3461	0.222765	0.499788	0.13342	0.414463	0.417025	0.238922	0.0732167	0.280267	0.0279742	0.255368	0.108731	0.0315035	0.108025	0.314464
10589	DRAP1	0.259432	0.129102	2.00951	0.0444833	0.259179	22.6654	6.46541	0.263528	2.22978	0.411888	-0.773123	2.12051	-0.255486	1.87164	0.375788	0.206492	-0.253233	0.378377	-0.0839795	1.09534	0.0284027	0.251332	0.107286	0.0318398	0.108047	0.342494
27304	MOCS3	0.208475	0.103706	2.01025	0.0444048	0.259179	0	1.41647	0.922504	1.43095	0.524099	-0.0560302	0.908258	1.5076	0.185271	0.239924	0.263182	-0.0182805	0.160897	0.502921	0.103614	0.0281123	0.252165	0.106447	0.0313817	0.111283	0.312768
5202	PFDN2	0.208503	0.103701	2.01062	0.0443651	0.259179	0	2.0199	0.846385	1.22889	-0.238754	0.135514	1.50252	0.376896	1.44131	0.205851	-0.119484	0.0442175	0.266919	0.12395	0.827488	0.0280595	0.250446	0.106468	0.0315589	0.108157	0.329618
5133	PDCD1	0.208659	0.103776	2.01068	0.0443596	0.259179	0	2.45357	0.78347	1.67292	0.522148	0.230268	0.528589	1.73619	-0.279827	0.280864	0.262193	0.0751524	0.0935389	0.58211	-0.156581	0.0281863	0.252148	0.106517	0.0313147	0.112413	0.313113
90634	N4BP2L1	0.208466	0.103677	2.01072	0.0443549	0.259179	0	1.06502	0.957153	1.11977	0.360532	1.11006	0.654108	1.35914	0.465596	0.187489	0.180633	0.365136	0.115784	0.452095	0.260984	0.0280344	0.25102	0.108197	0.0313329	0.110644	0.314203
23367	LARP1	0.443457	0.220471	2.01141	0.044282	0.259179	69.5041	16.3957	0.00580071	3.37076	1.01242	1.54981	5.33677	-1.5895	0.543068	0.574602	0.514516	0.513818	1.00121	-0.531155	0.304709	0.0290588	0.258273	0.109916	0.0351963	0.111667	0.314821
124961	ZFP3	0.247544	0.123069	2.01142	0.0442808	0.259179	17.3617	6.05046	0.301339	1.93502	-0.897011	0.393991	0.713198	2.53284	0.267214	0.325405	-0.454253	0.128673	0.126264	0.869718	0.14951	0.0282801	0.256448	0.10666	0.0313428	0.117907	0.313059
203522	INTS6L	0.208836	0.103804	2.01183	0.0442379	0.259179	0	2.75389	0.737865	0.665533	-0.312581	0.27593	2.44636	0.434331	0.106161	0.111276	-0.15653	0.0900686	0.437818	0.142883	0.0593544	0.0279554	0.250766	0.106549	0.0320293	0.108223	0.312588
55502	HES6	0.209144	0.103902	2.0129	0.0441254	0.259179	0	4.15957	0.526678	1.64442	1.12943	-0.987663	1.80302	0.071107	0.0140563	0.276033	0.576317	-0.324318	0.320931	0.023364	0.00785771	0.0281769	0.260379	0.107827	0.0316829	0.107962	0.312502
4891	SLC11A2	0.209168	0.10389	2.01337	0.0440761	0.259179	0	4.30284	0.506688	0.856708	-0.690921	0.992206	2.21138	0.621955	-0.940026	0.143313	-0.348067	0.32583	0.394902	0.204874	-0.531393	0.0279837	0.253786	0.107839	0.0318897	0.108507	0.319559
540	ATP7B	0.208892	0.103704	2.01432	0.0439764	0.259179	0	1.38041	0.926445	1.61597	-0.211855	0.501793	1.01293	1.18057	-0.331713	0.271213	-0.106002	0.163985	0.179511	0.391501	-0.185689	0.0281678	0.250351	0.106796	0.0314064	0.109971	0.313362
9644	SH3PXD2A	0.209545	0.103924	2.01634	0.0437649	0.259179	0	4.5022	0.47959	2.03895	0.617745	-1.20617	1.39782	0.750173	-0.239565	0.343133	0.310731	-0.39734	0.248171	0.247398	-0.134017	0.0283212	0.253017	0.10852	0.0315211	0.10876	0.312949
23014	FBXO21	0.209471	0.103861	2.01685	0.0437117	0.259179	0	3.68184	0.596069	0.60081	-1.12364	1.0558	1.89827	1.04788	0.556539	0.10044	-0.573244	0.347016	0.338123	0.346811	0.312327	0.0279474	0.260269	0.108027	0.0317271	0.109537	0.314939
9737	GPRASP1	0.209343	0.103784	2.0171	0.0436853	0.259179	0	2.79028	0.73228	1.95542	0.162477	-0.63039	0.818843	1.04458	0.921875	0.328882	0.0812718	-0.206208	0.145013	0.345703	0.520907	0.028288	0.250206	0.107002	0.0313627	0.109527	0.319284
51027	BOLA1	0.256579	0.127018	2.02001	0.0433818	0.259179	20.8422	6.3165	0.276629	2.21616	0.0184878	2.33231	-0.267183	0.686666	0.874182	0.373452	0.00924393	0.789717	-0.0472614	0.226317	0.493419	0.0283966	0.250003	0.114649	0.0312893	0.108628	0.318587
201973	PRIMPOL	0.208047	0.103743	2.0054	0.04492	0.260542	0	1.95371	0.855512	0.601668	-0.0102022	0.838897	2.08049	0.692097	-0.319455	0.100584	-0.00510112	0.274971	0.371113	0.228118	-0.178809	0.0279475	0.250001	0.107437	0.0318185	0.108639	0.313299
9094	UNC119	-0.208047	0.103865	-2.00305	0.0451719	0.261834	0	3.99703	0.549844	-0.988973	0.130493	-0.235492	-2.429	-0.34629	0.96887	-0.165509	0.0652639	-0.0768585	-0.434639	-0.113868	0.548084	0.0280075	0.250133	0.10652	0.0320185	0.108125	0.32001
10734	STAG3	0.207577	0.103721	2.00129	0.0453609	0.26276	0	1.63085	0.897494	1.25454	1.60931	0.671713	0.810858	0.566762	0.205778	0.210171	0.839339	0.219803	0.143595	0.186613	0.115094	0.0280658	0.272015	0.107078	0.0313611	0.108413	0.312831
284390	ZNF763	-0.207664	0.103866	-1.99934	0.0455718	0.26347	0	3.79753	0.57892	-1.49229	0.675199	-0.0838927	-1.00178	-2.02199	0.114061	-0.250286	0.340031	-0.0273717	-0.177526	-0.68298	0.0637724	0.0281299	0.253613	0.106452	0.0314037	0.114092	0.312602
6935	ZEB1	-0.207789	0.103936	-1.99919	0.0455874	0.26347	0	4.96941	0.419625	-1.36033	-1.37026	-1.05017	-1.3655	1.27751	-0.799138	-0.228004	-0.706158	-0.345137	-0.24239	0.424323	-0.450341	0.0280929	0.265583	0.10801	0.0315101	0.110324	0.31757
10565	ARFGEF1	-0.207484	0.103785	-1.99918	0.0455887	0.26347	0	2.5518	0.768674	-1.87803	-0.457059	0.667624	-1.4603	-0.443071	0.195172	-0.315702	-0.229279	0.218457	-0.259356	-0.145766	0.109157	0.0282585	0.251643	0.107071	0.0315433	0.108234	0.312798
23385	NCSTN	-0.29053	0.145332	-1.99907	0.0456005	0.26347	34.8487	7.67444	0.175114	-1.1383	1.63892	-0.64089	-2.64829	-1.7043	-1.34201	-0.190606	0.856179	-0.209661	-0.474935	-0.570989	-0.767686	0.0280385	0.272908	0.107021	0.0321617	0.112244	0.327234
552889	ATXN7L3B	0.207364	0.103751	1.99866	0.0456448	0.263557	0	2.21562	0.818577	1.52899	0.151857	1.66417	0.227257	0.833392	0.577705	0.256491	0.0759557	0.553117	0.0401974	0.275083	0.324303	0.0281408	0.25018	0.110468	0.0312869	0.10895	0.315129
64405	CDH22	0.261898	0.131119	1.9974	0.0457816	0.264177	24.0437	6.58273	0.253568	1.29425	-0.0458416	0.197694	1.12595	3.06105	-0.123847	0.216861	-0.0229216	0.0645152	0.199633	1.07414	-0.0692457	0.0280757	0.250016	0.106497	0.0314362	0.123136	0.31262
56950	SMYD2	0.2283	0.114333	1.99681	0.0458459	0.264208	9.68882	5.53641	0.35397	1.11618	0.650384	-0.960959	1.35899	1.79737	1.59508	0.186886	0.327363	-0.31544	0.241228	0.603518	0.921464	0.0280337	0.253349	0.107752	0.0315079	0.112747	0.333727
1528	CYB5A	0.207392	0.103853	1.99697	0.0458285	0.264208	0	3.55013	0.615817	1.24401	-0.0162827	0.131891	2.3839	-0.455657	-0.286701	0.208397	-0.00814139	0.0430351	0.426383	-0.149918	-0.160436	0.0280632	0.250002	0.106467	0.0319907	0.10825	0.313143
55759	WDR12	0.206954	0.103657	1.99653	0.0458761	0.264214	0	0.786345	0.977896	1.15212	0.538414	-0.0785699	1.33135	1.10077	0.406035	0.19293	0.270435	-0.0256349	0.236286	0.364591	0.22745	0.0280416	0.252285	0.106451	0.0314986	0.109704	0.313793
55760	DHX32	0.20718	0.103812	1.99572	0.0459643	0.264552	0	2.96544	0.705314	1.93575	-0.346325	-0.555648	1.54577	0.583829	-0.205549	0.325531	-0.173488	-0.181652	0.274675	0.192257	-0.114966	0.0282803	0.250941	0.106877	0.0315753	0.108441	0.31283
6810	STX4	-0.206853	0.103746	-1.99384	0.0461701	0.265449	0	2.27651	0.809711	-1.58921	-1.51053	-0.0227714	-0.768747	-0.285758	-0.878327	-0.266681	-0.783723	-0.0074293	-0.13612	-0.0939402	-0.495804	0.0281593	0.269194	0.106443	0.0313529	0.108071	0.318646
29115	SAP30BP	-0.206726	0.103687	-1.99375	0.0461792	0.265449	0	1.54087	0.908305	-1.12618	-0.530094	0.0419341	-1.68728	-0.0751081	-1.05467	-0.188567	-0.266218	0.0136814	-0.300091	-0.0246787	-0.597949	0.0280359	0.252215	0.106445	0.0316323	0.107963	0.321439
4717	NDUFC1	0.206611	0.103659	1.99318	0.0462414	0.265637	0	0.782262	0.978151	1.53342	0.272466	0.770812	0.745544	1.07553	-0.150576	0.25724	0.136391	0.25247	0.132003	0.356103	-0.0841984	0.0281422	0.250581	0.107281	0.0313486	0.109623	0.312677
6778	STAT6	-0.292858	0.147096	-1.99092	0.0464894	0.266408	36.1432	7.83002	0.165856	-0.273044	0.74172	-1.02215	-1.72448	-2.37484	-1.81905	-0.0456234	0.37409	-0.335797	-0.306783	-0.810956	-1.06174	0.0279196	0.254373	0.107926	0.0316482	0.116608	0.340682
55032	SLC35A5	-0.206609	0.103778	-1.99087	0.0464952	0.266408	0	2.96396	0.705543	-0.604085	0.256927	0.0339538	-1.72918	-1.49737	-1.12394	-0.100989	0.128596	0.0110777	-0.30763	-0.499405	-0.638464	0.0279478	0.250517	0.106444	0.0316502	0.111236	0.322691
6242	RTKN	-0.206576	0.103769	-1.99072	0.0465113	0.266408	0	2.49434	0.777347	-1.22381	-0.404749	-0.25883	-1.9765	0.642643	-0.639726	-0.204996	-0.202895	-0.0844818	-0.352268	0.211726	-0.359461	0.0280583	0.251286	0.106536	0.0317653	0.108544	0.31573
246329	STAC3	-0.206667	0.103822	-1.99059	0.0465255	0.266408	0	3.18856	0.670941	-2.15759	0.139849	-1.43842	-0.443957	-0.177446	0.422638	-0.363418	0.069946	-0.475815	-0.0785498	-0.0583144	0.236791	0.028371	0.250153	0.109422	0.0313046	0.107999	0.313902
221914	GPC2	0.280079	0.140719	1.99034	0.0465532	0.266408	31.7848	7.32975	0.197249	2.04012	1.05825	-0.950403	3.11892	-0.251623	0.899608	0.343333	0.538632	-0.311933	0.56241	-0.0827087	0.508062	0.0283217	0.259066	0.107723	0.0325161	0.108045	0.318953
915	CD3D	0.206486	0.103721	1.99078	0.0465052	0.266408	0	1.9165	0.860575	1.86121	-0.257415	-0.0599171	0.733026	1.07178	0.812217	0.31284	-0.128841	-0.0195487	0.129781	0.354842	0.457834	0.0282522	0.250519	0.106448	0.0313463	0.109611	0.31774
7159	TP53BP2	-0.206358	0.103737	-1.98925	0.0466739	0.266416	0	2.36119	0.797239	-1.4041	-0.97458	-0.0820092	-0.434477	-1.40754	-1.10469	-0.23539	-0.494687	-0.0267571	-0.0768712	-0.468615	-0.627181	0.0281048	0.257647	0.106452	0.0313036	0.110844	0.322334
598	BCL2L1	-0.248035	0.124731	-1.98856	0.0467502	0.266416	18.7816	6.15624	0.291311	-1.55956	-0.298302	0.476464	-1.18914	-2.75356	0.180866	-0.261662	-0.149359	0.155682	-0.210897	-0.953534	0.101149	0.0281501	0.250697	0.106761	0.0314543	0.119918	0.312756
1774	DNASE1L1	-0.212654	0.106939	-1.98855	0.0467506	0.266416	2.82845	5.14554	0.398378	-0.905186	-1.33489	0.723217	-2.47092	0.147845	-0.393417	-0.151445	-0.686843	0.23677	-0.442322	0.0485837	-0.220354	0.027992	0.264742	0.10718	0.0320448	0.107986	0.313714
6548	SLC9A1	-0.281526	0.141581	-1.98845	0.0467621	0.266416	32.2909	7.38453	0.193577	0.425886	-0.328727	-1.80255	-1.71387	-2.31486	-0.535737	0.0711751	-0.164642	-0.601082	-0.304875	-0.7889	-0.300566	0.02793	0.250847	0.111197	0.0316436	0.116144	0.314759
5287	PIK3C2B	0.206079	0.103631	1.98858	0.0467478	0.266416	0	0.407504	0.99512	1.1118	0.216831	0.917048	1.03257	1.07318	0.141143	0.186149	0.108495	0.300861	0.183005	0.355313	0.078921	0.0280327	0.250368	0.107634	0.0314114	0.109616	0.312656
10152	ABI2	0.345764	0.173866	1.98869	0.0467358	0.266416	52.3967	10.5035	0.0621634	1.24711	1.03464	0.0119448	4.47092	-0.275653	1.12006	0.208919	0.526198	0.00389706	0.823546	-0.0906151	0.636188	0.0280639	0.258653	0.106443	0.0339299	0.108063	0.322618
51001	MTERF3	0.20665	0.103884	1.98924	0.0466745	0.266416	0	4.33713	0.501965	1.29254	-1.11087	-0.253256	2.0505	0.37561	0.98983	0.216574	-0.566466	-0.0826609	0.365672	0.123527	0.560236	0.0280752	0.260028	0.106532	0.0318029	0.108155	0.320347
157769	FAM91A1	-0.206169	0.103706	-1.98801	0.0468111	0.266527	0	1.46866	0.916657	-1.54527	-0.844893	-1.26451	-0.839917	0.0254637	0.118452	-0.259245	-0.427239	-0.416963	-0.148755	0.00836648	0.0662285	0.0281457	0.255704	0.10873	0.031367	0.107955	0.31261
284323	ZNF780A	-0.206227	0.103782	-1.98712	0.0469094	0.266603	0	2.59061	0.762791	-0.50962	0.486439	-1.16642	-1.6357	-1.41607	-0.0400998	-0.0851806	0.244124	-0.384003	-0.290818	-0.471533	-0.0224169	0.0279376	0.251862	0.108383	0.0316109	0.11088	0.312513
57563	KLHL8	-0.206476	0.10391	-1.98707	0.0469148	0.266603	0	4.52876	0.476045	-1.8166	-0.656439	1.3755	-1.38324	-0.762755	-0.599248	-0.305253	-0.330452	0.454457	-0.245564	-0.251579	-0.336504	0.0282359	0.253412	0.10916	0.0315161	0.108787	0.315331
5768	QSOX1	-0.206279	0.103824	-1.98681	0.0469429	0.266603	0	3.51899	0.620516	-0.828168	-0.11105	0.753494	-1.92318	-1.23773	-0.984829	-0.138527	-0.0555355	0.246755	-0.342623	-0.410837	-0.557335	0.027979	0.250096	0.107244	0.0317391	0.110175	0.320266
11340	EXOSC8	0.243463	0.122494	1.98755	0.046861	0.266603	16.9869	6.02315	0.303973	0.192541	-0.833575	1.06741	2.04634	1.38816	1.72526	0.03217	-0.421388	0.350889	0.36492	0.461995	1.00247	0.027916	0.255549	0.108063	0.0318007	0.110763	0.337624
80018	NAA25	0.24937	0.125598	1.98546	0.0470935	0.267289	19.6671	6.2241	0.28502	2.06965	-1.37543	-0.0704032	2.49025	0.224596	1.00824	0.348377	-0.70899	-0.0229702	0.445866	0.0738187	0.570923	0.0283338	0.265708	0.10645	0.0320571	0.108026	0.320649
51012	PRELID3B	0.290261	0.14634	1.98348	0.0473139	0.267359	35.949	7.80628	0.16724	0.841758	0.990662	0.617066	3.85355	0.0353445	-0.486495	0.140806	0.503106	0.201827	0.702222	0.011613	-0.272767	0.0279812	0.25791	0.106979	0.0332068	0.107956	0.31436
84277	DNAJC30	0.20582	0.103765	1.98352	0.047309	0.267359	0	2.3256	0.8025	0.66774	1.74534	0.693546	1.14776	0.973359	0.148613	0.111646	0.91743	0.226993	0.20352	0.321823	0.0831002	0.0279557	0.276302	0.107121	0.0314423	0.109317	0.312673
26152	ZNF337	0.206062	0.103879	1.98367	0.0472922	0.267359	0	4.66601	0.457984	0.997667	0.851574	1.2835	-0.0526859	1.86004	1.33062	0.166969	0.430695	0.423364	-0.00931824	0.625548	0.760867	0.0280092	0.255797	0.108801	0.0312809	0.113103	0.326973
6949	TCOF1	0.205793	0.103719	1.98413	0.0472417	0.267359	0	2.22248	0.817582	1.3546	0.537284	-0.310368	0.857783	1.31279	1.21659	0.227037	0.269862	-0.101323	0.151929	0.436311	0.693038	0.0280914	0.252276	0.106578	0.0313707	0.110459	0.324508
900	CCNG1	0.205941	0.103779	1.98443	0.0472082	0.267359	0	2.63121	0.756618	2.25968	0.600993	0.702081	0.409327	0.351138	-0.563942	0.380917	0.302207	0.229804	0.0724185	0.115465	-0.316514	0.0284162	0.252854	0.107137	0.031301	0.10813	0.315005
84056	KATNAL1	0.205776	0.103685	1.98463	0.0471852	0.267359	0	1.2201	0.942934	1.44013	-0.297246	0.947039	1.25316	0.618972	-0.382252	0.241474	-0.148829	0.310816	0.222321	0.203887	-0.214077	0.0281149	0.250692	0.107714	0.0314736	0.108502	0.313646
7486	WRN	0.206327	0.103939	1.98507	0.0471362	0.267359	0	4.91006	0.426955	1.90967	0.765913	-0.380599	1.89823	-0.764148	-0.533936	0.321087	0.386516	-0.124291	0.338114	-0.252042	-0.299549	0.0282704	0.254669	0.106646	0.0317271	0.10879	0.314743
9540	TP53I3	-0.205786	0.103821	-1.98213	0.0474645	0.267666	0	3.65331	0.600328	-2.25222	-0.441894	0.458303	-0.335007	-0.741765	-1.20079	-0.379637	-0.221624	0.149731	-0.0592633	-0.244605	-0.683696	0.0284128	0.251535	0.106738	0.0312943	0.108742	0.324186
58476	TP53INP2	-0.205408	0.103638	-1.98196	0.0474834	0.267666	0	0.983877	0.963856	-1.30858	-0.582159	-0.408463	-0.722053	-0.930781	-1.1429	-0.219277	-0.292633	-0.13341	-0.127835	-0.307579	-0.649593	0.0280793	0.252676	0.106677	0.0313444	0.109199	0.323049
7374	UNG	0.205568	0.103721	1.98193	0.0474872	0.267666	0	2.73167	0.741271	0.551579	0.952534	0.331181	1.3199	0.84212	1.69917	0.092201	0.483166	0.108128	0.23424	0.277991	0.986117	0.0279419	0.257295	0.106596	0.0314949	0.108971	0.336811
23087	TRIM35	0.205474	0.103665	1.98209	0.0474693	0.267666	0	0.903385	0.969976	1.88882	0.435224	0.21686	0.695066	0.727988	0.122014	0.317538	0.218259	0.0707735	0.123048	0.240029	0.0682208	0.0282625	0.251489	0.106508	0.0313397	0.108713	0.312616
51084	CRYL1	-0.205543	0.103726	-1.98159	0.0475246	0.267709	0	1.8321	0.871855	-1.26446	-1.01617	-1.33599	-1.07889	-0.056488	0.418677	-0.211842	-0.516486	-0.441084	-0.191252	-0.0185603	0.234562	0.0280682	0.258336	0.109003	0.0314234	0.107959	0.313875
8514	KCNAB2	-0.205444	0.103713	-1.98088	0.0476044	0.267823	0	1.9504	0.855965	-1.17186	0.798272	-0.838547	-1.34207	-0.587659	-1.00705	-0.196251	0.40317	-0.274855	-0.238202	-0.193524	-0.570231	0.0280461	0.25508	0.107437	0.0315022	0.108447	0.320629
252969	NEIL2	0.20587	0.103918	1.98108	0.047582	0.267823	0	4.54112	0.474401	2.39289	1.45435	-0.394676	0.597769	-0.192027	0.27347	0.403814	0.752471	-0.128897	0.105797	-0.0631085	0.153017	0.0284786	0.267694	0.106661	0.0313243	0.108007	0.313085
26499	PLEK2	0.205529	0.103802	1.98002	0.0477018	0.268203	0	2.88786	0.717269	1.30413	-1.05639	0.114898	1.68986	1.03851	0.210396	0.218528	-0.537654	0.0374892	0.300555	0.343665	0.11768	0.0280782	0.259033	0.106461	0.0316334	0.109509	0.312846
[truncated: 7,408 more rows]
