# Supplementary material for: Perinatal granulopoiesis and risk of pediatric asthma
Source: eLife. 2021 Feb 10;10:e63745. doi: 10.7554/eLife.63745 (PMC7889076; doi:10.7554/eLife.63745)
Supplement: Supplementary file 2. [file elife-63745-supp2.xlsx]

## Sheet: res_ga
Table S2. Meta-Analysis of CBMC Gene Expression Associated with Gestational Age
Younger (red) and Older (blue) gestational age associated genes colored, 1% FDR
entrezgene	HGNC Symbol	Effect Size	SE	z-Score	p-value	p-adj (FDR)	I2	Q-value	Q, p-values	zSco_GSE27272	zSco_GSE30032	zSco_GSE73685	zSco_GSE37100	zSco_GSE53473	zSco_GSE36828	zSco_GSE48354	Effect_GSE27272	Effect_GSE30032	Effect_GSE73685	Effect_GSE37100	Effect_GSE53473	Effect_GSE36828	Effect_GSE48354	EffectVar_GSE27272	EffectVar_GSE30032	EffectVar_GSE73685	EffectVar_GSE37100	EffectVar_GSE53473	EffectVar_GSE36828	EffectVar_GSE48354
222166	MTURN	-0.491342	0.0834603	-5.88713	3.9296e-09	3.86555e-05	0	5.36279	0.498193	-1.83772	-0.259046	-2.26707	-3.50439	-3.63439	-0.819102	-2.29711	-0.374364	-0.0701512	-1.00408	-0.659043	-0.56391	-0.304909	-0.471836	0.041498	0.0733362	0.196159	0.0353673	0.0240745	0.138568	0.0421909
85450	ITPRIP	0.495649	0.0860446	5.76038	8.39266e-09	4.12793e-05	0	4.5807	0.5986	3.31084	0.659853	1.76282	3.39857	2.30748	0.456191	2.48499	0.558239	0.163041	0.762034	0.768284	0.458883	0.170261	0.486136	0.0284292	0.0610519	0.186866	0.0511034	0.0395484	0.139296	0.0382709
81671	VMP1	0.510997	0.094591	5.40218	6.58368e-08	0.000215879	0	6.01778	0.421201	2.07792	2.23987	3.21297	2.04494	2.28929	0.261846	2.47996	0.406826	0.556866	1.52289	0.50481	0.485495	0.102256	0.550964	0.038332	0.0618093	0.22466	0.0609388	0.0449748	0.152506	0.0493579
8874	ARHGEF7	-0.360468	0.0709859	-5.07802	3.81392e-07	0.000799058	0	4.04346	0.670795	-1.51386	-3.31559	-1.26723	-1.39193	-3.28759	-0.901114	-1.17528	-0.268006	-0.596471	-0.538456	-0.258845	-0.455648	-0.227328	-0.203304	0.0313416	0.0323637	0.180545	0.0345816	0.019209	0.0636427	0.0299231
27013	CNPPD1	-0.483705	0.0967357	-5.00028	5.72474e-07	0.000799058	0	3.20091	0.78324	-1.55071	-0.81518	-1.42509	-3.86734	-2.01271	-0.3748	-1.98893	-0.44196	-0.250673	-0.60845	-0.710654	-0.37226	-0.157784	-0.531547	0.0812277	0.0945603	0.18229	0.033767	0.0342083	0.177226	0.0714241
1326	MAP3K8	0.481579	0.0964016	4.99556	5.86668e-07	0.000799058	0	6.27842	0.392735	2.50582	1.4359	2.15948	3.19788	1.5797	0.0118972	2.61237	0.548643	0.446334	0.950905	0.7717	0.278958	0.0039754	0.590217	0.0479381	0.0966209	0.193899	0.0582334	0.0311836	0.111653	0.051045
10199	MPHOSPH10	-0.386085	0.077414	-4.98727	6.12372e-07	0.000799058	0	2.92881	0.817728	-1.17758	-0.564127	-1.45226	-3.09251	-2.72961	-1.06271	-2.41743	-0.281972	-0.13133	-0.620599	-0.490462	-0.400524	-0.246513	-0.531231	0.0573363	0.0541972	0.182615	0.0251529	0.0215306	0.0538083	0.0482902
84365	NIFK	-0.400522	0.0806583	-4.96567	6.84647e-07	0.000799058	0	6.55935	0.363525	-0.964452	-0.176207	-2.49518	-2.66628	-4.06794	-0.689096	-2.1334	-0.211386	-0.048367	-1.1201	-0.43477	-0.496445	-0.175812	-0.495487	0.0480385	0.0753443	0.201517	0.0265893	0.0148934	0.0650937	0.053941
7414	VCL	-0.404671	0.0822222	-4.92168	8.58028e-07	0.000799058	0	1.57377	0.954444	-2.33874	-1.44102	0.190705	-2.15147	-3.00279	-1.02107	-1.87776	-0.413764	-0.3644	0.0796363	-0.478281	-0.446741	-0.366852	-0.405575	0.0312998	0.063947	0.17438	0.0494191	0.0221342	0.129084	0.0466509
54432	YIPF1	0.390913	0.0795587	4.91351	8.94584e-07	0.000799058	0	5.95024	0.428788	2.90082	1.82284	2.35347	3.05585	1.16789	0.41335	1.39409	0.555725	0.489053	1.04748	0.48883	0.192132	0.126427	0.278359	0.036701	0.0719804	0.198095	0.0255889	0.0270643	0.0935497	0.0398687
3482	IGF2R	0.43875	0.0894158	4.90685	9.25517e-07	0.000799058	0	5.66712	0.461492	3.10689	2.55991	2.50245	1.7426	1.44951	0.0830194	1.45996	0.626122	0.600603	1.12388	0.345307	0.285519	0.0355155	0.321486	0.040613	0.0550458	0.201701	0.039266	0.0387999	0.183011	0.0484888
4976	OPA1	-0.4055	0.0829477	-4.88862	1.01545e-06	0.000799058	0	6.158	0.405725	-1.36634	-0.974381	-2.71626	-2.29618	-1.76587	-0.88038	-3.38978	-0.299425	-0.230932	-1.2374	-0.345061	-0.33542	-0.303941	-0.654373	0.0480242	0.0561708	0.207529	0.022583	0.0360796	0.11919	0.0372656
63941	NECAB3	-0.368621	0.0755231	-4.88091	1.05599e-06	0.000799058	0	3.33334	0.765994	-2.10103	-2.96011	-0.729857	-2.03995	-2.06936	-0.942828	-2.02849	-0.40414	-0.601159	-0.306439	-0.429326	-0.347966	-0.152543	-0.430211	0.0369996	0.0412444	0.176284	0.0442929	0.0282749	0.0261769	0.0449799
3046	HBE1	-0.975889	0.201008	-4.85498	1.20398e-06	0.000845968	34.7456	10.7273	0.0971807	-2.43571	-2.05195	-4.38147	-1.40104	-3.62714	-0.724886	-2.89498	-0.993527	-0.84804	-2.396	-0.52165	-0.96429	-0.325859	-1.21932	0.166383	0.170804	0.299042	0.138631	0.0706784	0.202078	0.177395
4149	MAX	-0.329765	0.0721256	-4.5721	4.82857e-06	0.00282084	0	0.213204	0.999814	-1.55251	-1.5134	-0.568026	-2.27357	-2.16649	-1.35569	-2.09602	-0.352733	-0.405252	-0.237944	-0.34772	-0.29804	-0.311358	-0.337095	0.0516208	0.0717037	0.175473	0.0233906	0.0189249	0.0527474	0.025865
55654	TMEM127	0.330684	0.0725485	4.55811	5.16164e-06	0.00282084	0	5.24158	0.513223	1.72623	2.09665	2.35364	1.74036	2.7863	0.179262	1.50932	0.346004	0.547473	1.04757	0.264867	0.375012	0.0410506	0.285522	0.0401758	0.0681825	0.198099	0.0231621	0.0181149	0.0524398	0.0357865
57599	WDR48	-0.378477	0.0842785	-4.49078	7.09618e-06	0.00367395	0	6.54468	0.365012	-1.70923	-2.6193	-1.96814	-2.61195	-0.711505	-1.24713	-2.37708	-0.360475	-0.616739	-0.858487	-0.469972	-0.103112	-0.344524	-0.522568	0.0444783	0.0554413	0.190264	0.0323754	0.0210021	0.0763158	0.0483278
10363	HMG20A	-0.398781	0.0908857	-4.38772	1.14548e-05	0.00536574	4.1315	7.30167	0.293848	-1.07616	-0.490714	-1.97089	-4.23928	-2.07478	-1.36522	-1.58638	-0.272201	-0.156518	-0.859799	-0.786727	-0.307796	-0.266883	-0.319182	0.0639778	0.101735	0.190313	0.0344401	0.0220081	0.0382151	0.0404819
23112	TNRC6B	-0.376807	0.0862905	-4.36672	1.26126e-05	0.0053665	8.06022	7.61368	0.267794	-1.36076	-3.62337	-0.391857	-2.30495	-0.381875	-0.881824	-3.50314	-0.265643	-0.61728	-0.163844	-0.358821	-0.0695462	-0.268337	-0.637764	0.0381094	0.0290228	0.174826	0.0242343	0.0331669	0.0925974	0.0331439
58191	CXCL16	0.544275	0.12487	4.35874	1.30816e-05	0.0053665	25.9281	9.45027	0.149793	1.73331	1.29259	2.1174	4.85971	2.43525	1.17766	1.02137	0.399917	0.381931	0.930352	1.09423	0.47094	0.432551	0.23586	0.0532339	0.0873064	0.193059	0.0506982	0.0373976	0.134908	0.0533265
6629	SNRPB2	-0.400719	0.0919386	-4.35854	1.3093e-05	0.0053665	23.0736	9.09961	0.168053	-2.10989	-4.01713	-1.53981	-3.35439	-2.84904	-0.126634	-0.24251	-0.405478	-0.841153	-0.659987	-0.467823	-0.335104	-0.0408664	-0.0530719	0.036933	0.0438447	0.183712	0.0194508	0.0138345	0.104143	0.0478928
118426	BORCS5	0.383574	0.0883325	4.34239	1.4094e-05	0.00554571	0	6.99907	0.320933	1.00857	0.960683	0.167361	4.11511	1.54454	0.946597	2.90647	0.242007	0.305685	0.0698818	0.636334	0.314576	0.156037	0.637243	0.057576	0.101248	0.174349	0.0239115	0.0414814	0.0271722	0.0480706
55691	FRMD4A	-0.417238	0.0975015	-4.2793	1.87485e-05	0.00685748	0	5.76849	0.449617	-1.02368	-0.169474	-1.53985	-2.17388	-0.779354	-1.18118	-3.72891	-0.367665	-0.0610611	-0.660005	-0.526988	-0.161902	-0.285472	-0.717852	0.128996	0.129814	0.183712	0.0587664	0.0431554	0.0584108	0.0370601
55350	VNN3	0.450153	0.105215	4.27843	1.8822e-05	0.00685748	0	5.26713	0.510037	1.99489	1.9967	3.04065	0.70171	1.77582	0.669998	1.50509	0.449126	0.552749	1.41993	0.328374	0.370136	0.216792	0.378238	0.0506874	0.0766354	0.218073	0.218989	0.0434436	0.104698	0.0631547
84268	RPAIN	-0.327717	0.0767521	-4.26981	1.95636e-05	0.00687311	0	4.66606	0.587299	-1.79535	-2.25862	-1.79579	-2.88539	-1.44632	-0.310755	-0.913228	-0.322535	-0.56618	-0.777347	-0.493387	-0.192404	-0.0987181	-0.222131	0.032274	0.0628377	0.187379	0.0292393	0.0176972	0.100916	0.0591641
54505	DHX29	-0.430082	0.101605	-4.23288	2.30717e-05	0.0078261	17.1726	8.45131	0.206868	-0.479847	-1.63422	-1.82748	-4.08274	-2.2798	-0.553542	-2.60082	-0.090738	-0.339225	-0.792132	-0.722627	-0.403344	-0.17212	-0.676826	0.0357579	0.0430876	0.187883	0.0313274	0.0313008	0.0966859	0.0677226
10295	BCKDK	0.383885	0.090992	4.21889	2.45503e-05	0.00805006	0	6.63416	0.356008	1.24655	1.54212	0.568737	1.11643	1.34533	0.58551	4.44561	0.239943	0.361234	0.238243	0.314396	0.244004	0.187413	0.765824	0.0370509	0.0548708	0.175476	0.0793026	0.0328959	0.102454	0.0296753
7905	REEP5	0.343092	0.0816929	4.19978	2.67177e-05	0.0084393	0	6.61641	0.357781	2.48339	2.56974	0.28798	0.208837	3.03604	-0.124176	2.19586	0.435136	0.611411	0.120318	0.0371524	0.46589	-0.045268	0.383114	0.0307016	0.0566092	0.174557	0.0316488	0.0235479	0.132895	0.0304402
80325	ABTB1	0.361537	0.08635	4.18688	2.82814e-05	0.0084393	0	4.41735	0.620389	1.29462	2.95723	1.17229	2.69489	1.36265	0.144013	1.00588	0.266952	0.651896	0.496819	0.512467	0.28146	0.0440283	0.211319	0.0425186	0.0485944	0.179608	0.0361617	0.0426645	0.0934671	0.0441349
3142	HLX	0.461647	0.110267	4.18664	2.83112e-05	0.0084393	1.27717	7.09056	0.312554	1.90823	1.20244	2.68874	3.26227	1.48337	0.554414	1.48397	0.469767	0.379039	1.22251	0.87615	0.291275	0.177478	0.336324	0.0606042	0.0993672	0.206732	0.0721303	0.0385572	0.102476	0.0513646
80223	RAB11FIP1	0.526819	0.126279	4.17186	3.02118e-05	0.00874099	40.1245	11.6909	0.0692297	1.02825	2.05806	2.71892	4.18743	3.09939	-0.372374	2.92574	0.205149	0.491863	1.23884	0.949431	0.523889	-0.140918	0.567545	0.0398051	0.0571176	0.207606	0.0514082	0.028571	0.143211	0.0376295
397	ARHGDIB	0.285591	0.0688382	4.14873	3.34325e-05	0.00935357	0	4.62877	0.592228	2.63402	1.42763	1.94494	1.62391	2.50702	0.254057	0.308277	0.368666	0.210816	0.847456	0.403645	0.341669	0.103787	0.0537967	0.0195897	0.0218061	0.189855	0.0617841	0.0185736	0.166887	0.0304528
5324	PLAG1	-0.376502	0.0909607	-4.13917	3.48559e-05	0.00935357	0	2.27982	0.89225	-1.23914	-0.652094	-1.52461	-2.0846	-1.68714	-1.63266	-2.29562	-0.341407	-0.187796	-0.653122	-0.592367	-0.28586	-0.326381	-0.541953	0.0759108	0.0829373	0.183516	0.0807489	0.0287081	0.0399631	0.0557341
3052	HCCS	0.348085	0.0844312	4.12271	3.74437e-05	0.00969298	0	5.47735	0.484199	2.58675	1.84211	0.289325	3.14172	1.37143	0.65543	0.353486	0.704054	0.529073	0.120881	0.494433	0.2396	0.136881	0.098558	0.0740802	0.0824895	0.17456	0.0247675	0.0305231	0.0436146	0.0777391
5743	PTGS2	0.479854	0.117604	4.08025	4.4987e-05	0.0107945	0	4.99678	0.544227	2.63909	1.80212	2.37614	0.529639	0.907232	0.485681	2.10886	0.739018	0.621001	1.05897	0.180473	0.214404	0.247491	0.531793	0.0784154	0.118746	0.198621	0.116109	0.0558508	0.259668	0.0635902
8529	CYP4F2	0.299967	0.0735826	4.0766	4.56989e-05	0.0107945	0	5.87576	0.43725	-0.0170109	1.01346	1.60349	1.86438	1.13082	2.65149	2.66661	-0.00358343	0.219651	0.688866	0.291785	0.18823	0.426075	0.599192	0.0443754	0.046974	0.184558	0.0244939	0.0277069	0.025822	0.0504909
1983	EIF5	-0.385401	0.0945741	-4.07512	4.59907e-05	0.0107945	0	5.7288	0.454245	-2.26933	-0.37585	-2.36744	-2.47315	-1.98892	-0.895543	-0.751826	-0.545313	-0.107144	-1.05456	-0.682092	-0.33048	-0.262566	-0.187135	0.0577423	0.0812659	0.198418	0.0760653	0.0276093	0.0859617	0.0619549
8609	KLF7	0.328493	0.0806775	4.07168	4.6676e-05	0.0107945	0	5.07152	0.534673	0.435823	1.54604	1.85895	2.95632	0.99809	1.57591	1.84246	0.103505	0.376075	0.806871	0.593402	0.176796	0.251358	0.437935	0.0564035	0.0591708	0.188395	0.0402897	0.0313765	0.0254403	0.0564967
116173	CMTM5	-0.433484	0.106529	-4.06915	4.71855e-05	0.0107945	0	2.94147	0.816157	-1.34502	0.107305	-1.59913	-1.58322	-2.35694	-2.34613	-1.24722	-0.421162	0.0368402	-0.68688	-0.550799	-0.465534	-0.595579	-0.326392	0.0980478	0.117871	0.184499	0.121033	0.0390128	0.0644429	0.0684848
4644	MYO5A	0.375495	0.0924778	4.06038	4.89922e-05	0.0109531	4.45488	7.32638	0.291715	2.89444	1.19753	2.27088	2.00676	1.02964	-0.110322	2.83249	0.564247	0.296026	1.00598	0.438153	0.180556	-0.0285843	0.502025	0.0380022	0.0611065	0.196243	0.0476715	0.0307506	0.0671322	0.0314133
5116	PCNT	-0.576474	0.142352	-4.04963	5.12984e-05	0.0112138	56.8019	16.2044	0.0126978	-2.93837	-3.03221	-1.37352	-7.25814	-1.22708	-0.708461	-1.80881	-0.660489	-0.735525	-0.585471	-1.04177	-0.222581	-0.243572	-0.378166	0.0505263	0.0588405	0.181694	0.020601	0.0329027	0.118202	0.04371
165	AEBP1	-0.399264	0.0989468	-4.03514	5.45692e-05	0.0116695	0	6.99618	0.3212	-0.0293226	-1.05074	-0.655625	-1.39551	-2.67482	-0.282049	-4.26443	-0.00870988	-0.357334	-0.274961	-0.329619	-0.479366	-0.0745121	-0.70403	0.0882304	0.115654	0.175886	0.0557904	0.0321177	0.0697919	0.027256
54815	GATAD2A	-0.367946	0.0918987	-4.00382	6.23283e-05	0.0130206	24.5306	9.27529	0.158678	-2.50193	-2.83581	-2.20217	-3.57495	-1.13724	-0.468757	-0.836871	-0.388563	-0.482999	-0.971894	-0.637455	-0.135795	-0.156594	-0.191961	0.0241198	0.0290094	0.194777	0.031795	0.0142581	0.111598	0.0526152
56922	MCCC1	-0.291256	0.0730429	-3.98746	6.67851e-05	0.0130206	0	5.84439	0.440846	-0.976602	-1.95394	0.419868	-3.18123	-2.40214	-0.830016	-0.465629	-0.156152	-0.33911	0.1756	-0.57069	-0.3805	-0.231864	-0.0919272	0.0255659	0.0301202	0.174913	0.0321817	0.0250906	0.0780358	0.038977
255104	TMCO4	0.321067	0.080635	3.98173	6.84158e-05	0.0130206	0	5.46227	0.486029	0.98575	0.529378	0.666015	3.30655	2.65217	0.166282	1.27514	0.256989	0.152543	0.279361	0.544323	0.452316	0.0300188	0.289556	0.0679665	0.0830329	0.175939	0.0270997	0.0290858	0.032591	0.0515645
93621	MRFAP1	-0.505528	0.126969	-3.98151	6.84784e-05	0.0130206	51.9697	14.5741	0.0238406	-1.43485	-0.894539	-1.58386	-4.74979	-3.02907	-0.329255	-4.55694	-0.249139	-0.198966	-0.679941	-0.872421	-0.380758	-0.134109	-0.951807	0.0301491	0.0494721	0.184293	0.0337368	0.0158009	0.165902	0.0436267
2634	GBP2	0.475784	0.119514	3.98097	6.86335e-05	0.0130206	34.5567	10.6963	0.0982291	2.79616	0.968314	1.0875	5.04804	1.18807	0.266437	2.5889	0.50424	0.213879	0.4599	0.981407	0.231635	0.109705	0.567272	0.0325201	0.048787	0.17884	0.0377966	0.0380124	0.169537	0.0480121
126299	ZNF428	-0.508773	0.128013	-3.97439	7.05589e-05	0.013096	43.7103	12.4357	0.0529263	-2.82674	-1.91806	-2.57146	-5.06264	-1.20329	0.0653106	-1.94266	-0.543879	-0.467813	-1.15999	-0.926642	-0.221755	0.0219953	-0.418818	0.0370196	0.0594869	0.203494	0.033502	0.0339627	0.11342	0.046479
23016	EXOSC7	-0.380207	0.0959146	-3.96402	7.36987e-05	0.0133823	24.3267	9.25029	0.159983	-2.53716	-1.80648	-2.29339	-4.24685	-1.48309	-0.408836	-0.617923	-0.440367	-0.403081	-1.01724	-0.666127	-0.222209	-0.108882	-0.125188	0.0301254	0.0497873	0.196737	0.0246026	0.0224485	0.0709281	0.0410444
90121	TSR2	-0.301605	0.0761552	-3.96041	7.48225e-05	0.0133823	0	5.913	0.433006	-2.41928	-3.0336	-1.0611	-1.76968	-1.48464	-0.265391	0.0993671	-0.423965	-0.58644	-0.448449	-0.27129	-0.281779	-0.0651681	0.0218886	0.0307104	0.0373706	0.178614	0.0235006	0.0360225	0.0602975	0.0485235
1601	DAB2	-0.566947	0.143788	-3.94294	8.04891e-05	0.0141388	44.9954	12.7262	0.0475958	-1.47024	-1.67872	-1.18376	-5.62131	-3.03722	-0.434091	-1.93515	-0.388918	-0.47008	-0.501832	-1.29049	-0.520639	-0.130823	-0.498054	0.0699745	0.0784123	0.179717	0.0527029	0.0293847	0.0908251	0.0662404
10929	SRSF8	-0.521693	0.132491	-3.93758	8.23075e-05	0.0142045	41.5129	11.9685	0.0626762	-2.08806	-0.833293	-2.4444	-5.70737	-0.887548	-0.746833	-2.55898	-0.483691	-0.242933	-1.09386	-0.863471	-0.162154	-0.294653	-0.619988	0.0536597	0.0849917	0.200254	0.0228888	0.033379	0.155659	0.0586994
8473	OGT	-0.343056	0.087275	-3.93075	8.46797e-05	0.014362	0	6.22462	0.398504	-0.210996	-0.980344	0.668149	-3.10472	-1.13171	-0.961916	-3.09518	-0.0620762	-0.384966	0.280264	-0.482166	-0.187254	-0.371125	-0.555292	0.0865567	0.154201	0.17595	0.0241183	0.0273775	0.148856	0.0321862
10287	RGS19	0.351803	0.089643	3.92449	8.69142e-05	0.0144824	0	4.34994	0.629433	1.45252	1.70726	2.21001	0.939818	2.05412	-0.118314	2.17398	0.318597	0.499277	0.975765	0.201917	0.412606	-0.0383463	0.391307	0.0481104	0.0855233	0.194941	0.0461591	0.0403478	0.105046	0.0323985
53407	STX18	-0.354834	0.0905633	-3.91807	8.92593e-05	0.0144824	0	6.31056	0.389315	-2.17334	-1.75359	-1.89043	-2.09696	0.163311	-1.18236	-2.29273	-0.521096	-0.518206	-0.821674	-0.376463	0.0367997	-0.218467	-0.579766	0.0574883	0.087327	0.18892	0.0322305	0.0507761	0.0341406	0.0639441
83879	CDCA7	-0.351487	0.0897429	-3.9166	8.98062e-05	0.0144824	0	6.58768	0.360665	-1.24871	-1.90355	-3.01288	-0.522161	-2.28474	-1.67637	-0.969455	-0.228894	-0.37198	-1.40375	-0.143356	-0.435587	-0.375212	-0.232066	0.0336004	0.0381864	0.21708	0.0753746	0.0363475	0.0500974	0.0573016
8925	HERC1	-0.351635	0.0899596	-3.90881	9.27509e-05	0.0145174	0	3.9045	0.689599	-1.85205	-2.38083	-1.47104	-2.07506	-0.246191	-0.695183	-1.75248	-0.381193	-0.634112	-0.629019	-0.37589	-0.0500105	-0.26047	-0.406739	0.0423629	0.0709376	0.182844	0.032814	0.0412646	0.140383	0.0538674
8148	TAF15	-0.374871	0.0959805	-3.9057	9.39549e-05	0.0145174	6.08863	7.45384	0.280906	-2.2853	-1.49016	-0.393603	-3.95395	-0.233908	-0.637808	-2.05874	-0.504624	-0.431058	-0.164576	-0.677754	-0.042231	-0.201186	-0.380207	0.0487585	0.0836764	0.174831	0.0293821	0.0325965	0.0994984	0.0341064
27257	LSM1	-0.45413	0.116312	-3.90442	9.44508e-05	0.0145174	41.0208	11.8686	0.0649652	-0.55982	-2.62262	-3.10333	-4.16617	-1.41928	-0.613782	-2.78912	-0.104191	-0.48815	-1.45686	-0.580705	-0.249711	-0.212188	-0.730786	0.0346386	0.0346447	0.220382	0.0194284	0.0309554	0.119512	0.0686511
3704	ITPA	-0.310563	0.0797345	-3.89497	9.8211e-05	0.0148631	0	6.88904	0.331231	-2.91415	-2.83314	-1.63917	-1.72423	-0.341622	-0.96851	-1.08237	-0.514451	-0.604449	-0.705129	-0.230864	-0.0576358	-0.22266	-0.248097	0.0311648	0.0455178	0.185051	0.0179276	0.0284638	0.0528538	0.0525405
55353	LAPTM4B	-0.585643	0.150709	-3.88592	0.000101944	0.0149703	54.6422	15.4329	0.0171444	-1.04904	-1.44648	-2.26672	-5.90789	-2.95136	-0.103525	-3.24726	-0.265998	-0.402364	-1.00391	-1.11134	-0.537021	-0.0283617	-0.776005	0.064294	0.0773773	0.196152	0.035386	0.0331084	0.0750543	0.0571076
6233	RPS27A	-0.449175	0.115666	-3.88339	0.000103012	0.0149703	55.409	15.6982	0.0154686	-1.74533	-1.84968	-2.54582	-6.12132	-3.55185	0.0593849	-1.45344	-0.263115	-0.288725	-1.14652	-0.862334	-0.463491	0.0230714	-0.287342	0.0227268	0.0243654	0.202819	0.0198454	0.0170284	0.150937	0.0390843
54455	FBXO42	0.320106	0.0824532	3.88227	0.000103485	0.0149703	0	2.88932	0.822605	0.218692	0.789162	1.12569	2.81564	1.59565	0.941881	2.15929	0.061183	0.25008	0.476497	0.489552	0.252428	0.198422	0.448245	0.0782699	0.100421	0.179178	0.0302304	0.0250264	0.0443802	0.0430934
259230	SGMS1	-0.337328	0.0869742	-3.87848	0.000105111	0.0149852	0	5.01522	0.541863	-0.749864	-0.405569	-1.43887	-3.36805	-1.0708	-1.21199	-1.81697	-0.197436	-0.132902	-0.614607	-0.667472	-0.20386	-0.213352	-0.432423	0.0693247	0.107383	0.182454	0.0392743	0.0362446	0.0309881	0.0566398
7128	TNFAIP3	0.386733	0.0999841	3.86794	0.000109757	0.0152293	0	4.58918	0.597474	1.06246	0.439455	1.41501	2.27243	1.95135	0.2257	2.6839	0.254869	0.1494	0.603948	0.915325	0.316216	0.0905063	0.631736	0.0575445	0.115576	0.182172	0.162245	0.0262601	0.160803	0.0554034
9739	SETD1A	-0.330561	0.0854697	-3.86758	0.00010992	0.0152293	0	6.47615	0.372014	-0.759658	-0.963308	-1.86449	-4.08054	-1.10194	-0.368989	-0.907158	-0.206404	-0.275622	-0.809471	-0.579454	-0.185414	-0.10205	-0.184186	0.0738246	0.0818645	0.188487	0.0201652	0.028312	0.0764895	0.0412239
26052	DNM3	-0.401849	0.104262	-3.85425	0.000116087	0.0158604	0	3.8225	0.700682	-0.117299	-1.57407	-0.76438	-1.96804	-2.72643	-1.02386	-1.80196	-0.0381125	-0.495081	-0.321116	-0.562616	-0.660131	-0.209382	-0.489714	0.105571	0.0989247	0.176484	0.0817249	0.0586235	0.0418212	0.0738573
1212	CLTB	0.330062	0.0858455	3.84484	0.000120633	0.0162558	0	2.26762	0.893514	1.73597	1.88947	0.92098	2.51768	1.63946	0.604343	0.476145	0.320487	0.457462	0.388033	0.49053	0.32327	0.183807	0.10443	0.034083	0.0586179	0.177516	0.0379603	0.0388803	0.0925034	0.0481032
284439	SLC25A42	-0.451697	0.117834	-3.83335	0.000126411	0.0168042	33.1612	10.473	0.106096	-0.870165	-1.47683	-1.56974	-4.8873	-1.48108	-0.942465	-2.27844	-0.185349	-0.329482	-0.673536	-1.01053	-0.303248	-0.257749	-0.471583	0.0453711	0.0497739	0.184104	0.0427527	0.0419218	0.0747936	0.0428391
10236	HNRNPR	-0.314349	0.0822398	-3.82234	0.000132189	0.017338	0	4.41568	0.620613	-0.61995	-1.86991	-1.35021	-3.05732	-1.26977	-0.663847	-1.38629	-0.138134	-0.498762	-0.575123	-0.573617	-0.178978	-0.21109	-0.313818	0.0496464	0.0711456	0.181433	0.0352016	0.0198677	0.101111	0.0512448
3043	HBB	0.272615	0.0714142	3.81737	0.000134882	0.0174584	2.6193	7.18828	0.303786	0.91087	2.92013	-0.972224	0.178914	3.95788	0.292068	2.29375	0.131231	0.491271	-0.410064	0.0788196	0.301434	0.072438	0.473811	0.0207569	0.0283032	0.177898	0.19408	0.0058004	0.0615127	0.0426694
57645	POGK	-0.351433	0.092504	-3.79911	0.000145218	0.018552	16.0046	8.33379	0.214654	-0.522925	-2.99324	-1.53009	-2.81716	-1.08009	-0.492587	-2.66745	-0.0920803	-0.574924	-0.655598	-0.578318	-0.150181	-0.162163	-0.51406	0.0310066	0.0368925	0.183586	0.0421415	0.0193335	0.108378	0.0371394
7874	USP7	-0.431785	0.113821	-3.79356	0.000148504	0.018605	25.1591	9.35317	0.154668	-2.47308	-0.835151	-1.95304	-2.94291	-0.575801	-0.512652	-3.53349	-0.611971	-0.256924	-0.851306	-0.458402	-0.0957977	-0.170186	-0.834317	0.061233	0.0946413	0.189997	0.0242627	0.02768	0.110205	0.0557512
5045	FURIN	-0.454519	0.119861	-3.79204	0.000149415	0.018605	12.2185	7.97435	0.239989	-0.889954	-2.40046	-2.52612	-0.594434	-1.64349	-0.463383	-3.34059	-0.247029	-0.643305	-1.13621	-0.1606	-0.30484	-0.17403	-0.823404	0.0770477	0.0718203	0.202307	0.072993	0.0344039	0.141048	0.0607547
25927	CNRIP1	-0.339847	0.0897253	-3.78763	0.00015209	0.0187014	0	4.5626	0.601003	-0.135431	-1.34315	-1.36952	-1.88264	-1.77349	-0.494392	-2.87694	-0.0373521	-0.438648	-0.583693	-0.43198	-0.451612	-0.0925544	-0.499013	0.0760668	0.106656	0.181649	0.0526492	0.0648447	0.0350471	0.0300859
760	CA2	0.528983	0.140071	3.77654	0.000159021	0.0193122	0	6.41795	0.378034	1.63091	1.30421	3.12428	0.15294	2.47351	0.120766	1.31814	0.516188	0.500828	1.46933	0.0644436	0.614047	0.0554946	0.479428	0.100175	0.147462	0.221176	0.17755	0.0616276	0.211159	0.13229
89846	FGD3	0.33579	0.0891204	3.76782	0.000164677	0.0197552	0	4.08609	0.665027	0.581807	2.50412	1.57604	0.707252	1.8687	0.0286454	2.27959	0.107165	0.49772	0.67639	0.216398	0.38184	0.0113217	0.459096	0.0339269	0.0395057	0.184188	0.0936182	0.0417527	0.156213	0.0405597
79691	QTRT2	-0.304678	0.0810334	-3.75991	0.000169973	0.0201449	0	6.36001	0.384092	-0.825963	0.32851	-0.399661	-3.12665	-3.07042	-0.476282	-1.27319	-0.234975	0.121765	-0.167118	-0.569552	-0.460504	-0.0883715	-0.21129	0.0809327	0.137389	0.17485	0.0331825	0.0224942	0.0344267	0.0275406
55246	CCDC25	-0.309748	0.0825952	-3.75019	0.000176698	0.0202038	0	6.69668	0.349811	-1.83286	-1.58318	-1.78195	-3.20288	-0.543584	-0.608718	-1.49572	-0.355146	-0.383388	-0.77091	-0.604669	-0.0789982	-0.147749	-0.28796	0.0375453	0.0586427	0.187162	0.0356414	0.0211204	0.0589137	0.0370648
84895	MIGA2	-0.309543	0.0825461	-3.74994	0.000176875	0.0202038	0	5.61255	0.46796	-1.50984	-1.82712	0.945097	-2.93266	-0.711782	-0.861864	-1.8203	-0.353797	-0.417478	0.398392	-0.485423	-0.130408	-0.199971	-0.418708	0.0549095	0.0522076	0.177693	0.0273979	0.0335671	0.0538337	0.0529095
754	PTTG1IP	0.280416	0.0748219	3.74779	0.000178402	0.0202038	0	5.96964	0.4266	2.77291	2.80032	1.15167	1.0374	1.41899	0.0158464	0.261526	0.467084	0.552984	0.487819	0.176275	0.219466	0.00607956	0.0486223	0.0283738	0.0389951	0.179416	0.0288732	0.0239207	0.147191	0.0345654
7078	TIMP3	-0.364258	0.0972031	-3.74739	0.000178686	0.0202038	0	5.39172	0.49464	-0.634242	-0.912704	-2.02224	-1.45868	-2.57561	-0.308792	-2.29195	-0.167405	-0.262174	-0.884355	-0.375937	-0.575752	-0.0674418	-0.53866	0.0696673	0.0825126	0.191244	0.0664215	0.0499701	0.0477009	0.0552359
51504	TRMT112	-0.292069	0.078155	-3.73705	0.000186192	0.0208133	0	3.11296	0.794541	-0.973113	-0.875676	-1.11143	-2.87267	-0.928443	-0.0984572	-2.23731	-0.207004	-0.262372	-0.470294	-0.456581	-0.143123	-0.03531	-0.375769	0.0452514	0.0897733	0.179051	0.0252619	0.0237635	0.128618	0.028209
51734	MSRB1	0.336114	0.0904908	3.71434	0.000203732	0.0222679	0	6.093	0.412854	1.07074	1.08756	2.88193	1.03044	2.33688	0.470286	1.65626	0.197285	0.306219	1.32892	0.206167	0.450524	0.205591	0.363327	0.0339487	0.0792785	0.212634	0.0400306	0.0371673	0.191109	0.0481213
116028	RMI2	-0.32992	0.0890636	-3.70431	0.000211963	0.0226639	0	5.62716	0.466223	-0.0894817	-2.80305	-1.55297	-1.9735	-1.42905	-0.330044	-1.73968	-0.0199977	-0.630951	-0.66594	-0.443766	-0.28878	-0.0834241	-0.380061	0.0499448	0.0506676	0.183883	0.0505633	0.0408356	0.0638908	0.0477275
80344	DCAF11	-0.441347	0.119711	-3.68676	0.000227123	0.0237682	18.621	8.60173	0.197246	-2.192	-1.8712	-2.01452	-2.65763	0.176246	-0.486244	-2.9455	-0.553679	-0.557811	-0.88065	-0.501489	0.040868	-0.138177	-0.788808	0.0638019	0.0888655	0.191102	0.0356069	0.0537686	0.0807538	0.0717174
56255	TMX4	0.298573	0.081087	3.68214	0.000231289	0.0239493	0	6.07172	0.415204	2.14361	1.03386	1.33107	0.442888	3.30373	-0.107488	1.1532	0.500909	0.283023	0.566639	0.0713636	0.491327	-0.0328926	0.239546	0.0546041	0.0749408	0.181222	0.0259637	0.0221174	0.0936427	0.0431483
10288	LILRB2	0.426312	0.116186	3.66922	0.000243288	0.0246724	13.0496	8.05057	0.234422	2.46934	3.04922	2.17875	2.24475	1.03764	0.0269902	0.572145	0.463347	0.750772	0.960362	0.775031	0.201552	0.00929097	0.155593	0.0352089	0.0606231	0.194292	0.119208	0.0377294	0.118498	0.0739547
6590	SLPI	0.483081	0.132195	3.65431	0.000257875	0.0256234	0	5.89879	0.434623	1.00426	0.758511	3.0835	1.24559	2.3122	0.520557	0.996069	0.320182	0.295995	1.44511	0.579831	0.583474	0.168744	0.3928	0.10165	0.15228	0.219641	0.216697	0.0636782	0.10508	0.155512
84263	HSDL2	0.400806	0.10991	3.64667	0.000265656	0.0261326	16.3785	8.37106	0.212159	1.52335	1.64158	2.65241	2.19548	3.51446	0.106329	0.0968044	0.341037	0.489847	1.20299	0.442329	0.584238	0.0313285	0.0242487	0.050119	0.089042	0.205703	0.0405913	0.0276352	0.0868116	0.0627463
254170	FBXO33	0.300673	0.0826818	3.63651	0.000276361	0.0267364	0	6.19984	0.40118	2.41148	0.322953	0.491885	0.0685008	2.72244	-0.265321	2.57325	0.446867	0.0892611	0.205866	0.0151536	0.400742	-0.075558	0.502573	0.034339	0.0763918	0.175164	0.0489374	0.0216677	0.0810992	0.0381446
84795	PYROXD2	-0.326159	0.0897724	-3.63318	0.000279948	0.0267364	0	4.17709	0.652726	-2.17968	-1.28808	-0.0152842	-2.24928	-1.16561	-0.16405	-2.12648	-0.569698	-0.37972	-0.00638002	-0.527562	-0.232632	-0.0373541	-0.390666	0.0683134	0.0869038	0.174243	0.0550124	0.0398321	0.051847	0.0337514
5165	PDK3	0.316762	0.0873327	3.62707	0.000286653	0.0268553	0	5.15401	0.524217	2.55036	0.32428	2.08467	1.52861	1.84323	-0.240262	1.24996	0.488303	0.081981	0.914461	0.341969	0.344074	-0.077538	0.251456	0.0366585	0.0639125	0.192422	0.0500472	0.0348452	0.10415	0.0404695
481	ATP1B1	-0.350527	0.0967076	-3.62461	0.0002894	0.0268568	0	1.53442	0.957175	-0.898586	-0.406423	-1.57048	-2.00521	-1.95283	-1.02745	-1.53073	-0.265137	-0.14931	-0.673868	-0.470642	-0.380942	-0.229304	-0.359904	0.0870606	0.134965	0.184114	0.0550888	0.038053	0.0498087	0.0552812
10873	ME3	-0.269628	0.0746102	-3.61383	0.000301711	0.0277377	0	2.36736	0.883007	-2.09204	-1.45459	-0.918701	-2.05077	-1.55157	-1.20617	-0.150844	-0.387338	-0.305003	-0.387055	-0.376068	-0.289762	-0.185869	-0.0324795	0.0342799	0.0439674	0.177499	0.0336279	0.034877	0.0237463	0.0463619
79048	SECISBP2	-0.298995	0.0828449	-3.60909	0.000307271	0.0279872	0	6.89564	0.330606	-1.15234	-1.98527	-1.78554	-2.90275	-0.536445	-0.311285	-2.07832	-0.225182	-0.432416	-0.772579	-0.515239	-0.072126	-0.0911176	-0.420622	0.0381865	0.047442	0.187218	0.0315064	0.0180773	0.0856816	0.0409602
10435	CDC42EP2	0.60743	0.168919	3.59598	0.000323167	0.0289553	60.6351	17.7824	0.00679975	1.06906	1.68597	4.2615	3.74563	3.13138	0.270866	2.43894	0.258538	0.464929	2.28658	0.832058	0.62592	0.0660943	0.618431	0.0584853	0.0760459	0.287904	0.0493465	0.0399545	0.0595415	0.0642955
80301	PLEKHO2	0.354803	0.0986801	3.59549	0.000323786	0.0289553	0	6.95311	0.325206	1.61828	1.16431	2.18054	0.443948	2.13038	-0.220435	3.0034	0.392388	0.348671	0.961244	0.0931058	0.388616	-0.0657163	0.592965	0.0587928	0.0896796	0.194329	0.0439834	0.0332756	0.0888762	0.0389791
10452	TOMM40	-0.289837	0.0808835	-3.58338	0.000339172	0.0299464	0	4.89162	0.557787	-1.38687	-1.24584	-0.447151	-3.33349	-1.30088	-0.0388702	-1.11839	-0.268951	-0.246123	-0.187058	-0.671423	-0.222941	-0.0112014	-0.227399	0.0376072	0.0390284	0.175003	0.0405689	0.02937	0.0830452	0.0413418
3684	ITGAM	0.417694	0.11661	3.58199	0.000340993	0.0299464	1.92107	7.13711	0.308353	2.62003	1.83749	2.87457	1.21604	1.1107	0.0301735	1.06431	0.621679	0.518561	1.32479	0.396512	0.205331	0.0131806	0.288139	0.0563013	0.0796433	0.212396	0.10632	0.0341754	0.190818	0.0732933
115362	GBP5	0.42386	0.118407	3.57969	0.000344001	0.0299464	14.2278	8.16116	0.226533	2.61949	1.59482	0.914334	1.97414	1.11402	-0.328778	3.23426	0.590326	0.448921	0.385181	0.758207	0.195831	-0.100502	0.787466	0.0507869	0.0792348	0.177468	0.147509	0.0309012	0.0934422	0.0592808
9516	LITAF	0.474332	0.132765	3.57271	0.000353305	0.0302253	50.0326	14.0091	0.0295343	3.01624	1.75984	3.97954	1.96268	1.48148	0.319126	2.40442	0.615824	0.413397	2.0514	0.352554	0.200282	0.160089	0.475236	0.0416852	0.0551809	0.265726	0.0322664	0.0182764	0.251652	0.0390659
1475	CSTA	0.360728	0.100968	3.57268	0.00035335	0.0302253	0	4.7525	0.575926	2.35704	1.47768	2.23406	0.621775	1.93259	0.80117	0.151543	0.54876	0.444237	0.987666	0.275083	0.373218	0.194483	0.0397037	0.0542041	0.0903788	0.195449	0.195731	0.0372947	0.058927	0.0686416
200316	APOBEC3F	-0.32142	0.0901182	-3.56664	0.000361581	0.0306627	13.8016	8.1208	0.229386	-1.73692	-1.7237	-1.52284	-3.56936	-2.09501	0.234666	-0.736018	-0.314112	-0.366652	-0.652326	-0.667501	-0.330406	0.0459458	-0.16169	0.0327046	0.0452467	0.183493	0.0349721	0.0248727	0.0383346	0.0482602
54210	TREM1	0.518791	0.145587	3.56344	0.000366032	0.0307174	30.0947	10.0136	0.124082	0.834692	1.70623	2.72586	3.53593	1.40773	1.28202	1.19248	0.244666	0.571373	1.24261	1.30988	0.300928	0.364927	0.289128	0.0859203	0.112141	0.207809	0.137232	0.0456967	0.081026	0.0587861
7405	UVRAG	0.266671	0.0748718	3.56169	0.000368471	0.0307174	0	6.0018	0.422989	0.785741	1.58196	2.50137	1.28734	2.53221	-0.0218529	1.11629	0.159734	0.319189	1.12332	0.241684	0.352806	-0.00470339	0.231439	0.0413272	0.0407105	0.201674	0.0352463	0.0194121	0.0463237	0.0429851
6001	RGS10	-0.400438	0.112685	-3.55361	0.000379981	0.0310884	27.1048	9.60283	0.142405	-3.34542	-1.26995	-0.677931	-1.06929	-0.957853	-0.645361	-3.81438	-0.681513	-0.30244	-0.284409	-0.268477	-0.136338	-0.238794	-0.796772	0.0414999	0.0567166	0.176001	0.063041	0.0202598	0.136912	0.0436335
118429	ANTXR2	0.544371	0.15321	3.5531	0.000380723	0.0310884	60.65	17.7891	0.00678148	2.83553	1.97146	3.63068	5.03654	2.56241	-0.204388	0.750301	0.523987	0.441443	1.79427	0.986709	0.426962	-0.078394	0.165005	0.0341486	0.0501387	0.244229	0.0383808	0.0277639	0.147114	0.0483644
3674	ITGA2B	-0.389527	0.109687	-3.55126	0.000383384	0.0310884	0	3.07644	0.799194	-0.622225	-1.70675	-1.82574	-0.506379	-2.08754	-1.88429	-0.94322	-0.193966	-0.613794	-0.791315	-0.165383	-0.401267	-0.668416	-0.240474	0.0971753	0.129331	0.187855	0.106667	0.0369485	0.125835	0.0649997
10469	TIMM44	-0.317754	0.089558	-3.54802	0.000388137	0.0310884	8.3059	7.63408	0.266156	-1.2483	0.066329	-1.63811	-3.25946	-0.866468	-0.864392	-2.83631	-0.269737	0.0160858	-0.704647	-0.588432	-0.153047	-0.167199	-0.512034	0.0466923	0.0588136	0.185037	0.0325912	0.0311994	0.0374149	0.0325903
79041	TMEM38A	0.293429	0.0827114	3.54762	0.000388723	0.0310884	0	2.80836	0.832487	1.1197	1.51377	1.52882	0.903035	1.39506	1.11883	2.34479	0.262755	0.391823	0.655024	0.167104	0.299369	0.185476	0.519978	0.0550682	0.0669976	0.18357	0.0342425	0.0460496	0.0274823	0.049177
6908	TBP	-0.258557	0.0729452	-3.54454	0.000393302	0.0312009	0	2.54999	0.862832	-1.80185	-1.69088	0.479228	-2.50325	-0.878783	-0.818969	-1.03398	-0.302008	-0.3767	0.200542	-0.358121	-0.160226	-0.2066	-0.183282	0.0280931	0.0496324	0.175117	0.0204669	0.0332434	0.0636393	0.0314209
90952	ESAM	-0.344904	0.097394	-3.54133	0.000398115	0.0313301	0	3.30627	0.76954	-2.43888	-0.166558	-0.743214	-1.15168	-2.27892	-0.314367	-1.64328	-0.595653	-0.048482	-0.312115	-0.287132	-0.464166	-0.0900812	-0.378856	0.0596496	0.0847287	0.17636	0.0621584	0.0414847	0.0821099	0.0531524
9604	RNF14	-0.509612	0.144142	-3.53549	0.000407019	0.0317765	52.995	14.892	0.0211134	-2.35201	-0.259347	-1.87305	-3.31697	-1.45628	-0.47959	-5.19087	-0.48397	-0.0667891	-0.813493	-0.564102	-0.264368	-0.188616	-1.19261	0.0423406	0.0663205	0.188629	0.0289222	0.0329556	0.154673	0.0527856
4758	NEU1	0.264538	0.0749061	3.53159	0.000413066	0.0319947	0	3.90581	0.689421	2.10969	0.258633	0.149656	2.14996	2.02908	-0.410597	1.71166	0.375023	0.0555613	0.0624851	0.31166	0.387259	-0.117911	0.302555	0.0315995	0.0461507	0.174327	0.0210136	0.0364254	0.0824666	0.0312446
2967	GTF2H3	-0.43253	0.122931	-3.51848	0.000434021	0.0333212	42.4922	12.1723	0.0582343	0.113948	-1.61599	-1.6256	-4.14699	-0.600856	-1.52936	-4.16231	0.0323193	-0.503508	-0.698938	-0.642157	-0.109467	-0.312863	-0.811013	0.0804478	0.0970818	0.184862	0.0239782	0.0331916	0.0418492	0.0379653
9654	TTLL4	0.453134	0.128852	3.51669	0.000436966	0.0333212	48.201	13.5138	0.0355652	0.949623	1.93126	1.71753	2.25918	2.13953	0.0715487	5.08814	0.212928	0.435648	0.741093	0.475756	0.383075	0.0161133	1.0191	0.0502761	0.0508851	0.186182	0.0443471	0.0320575	0.0507186	0.0401161
130074	FAM168B	-0.271234	0.0773095	-3.50841	0.000450791	0.034111	0	5.43695	0.48911	-1.82016	-2.77385	-1.7463	-0.453302	-1.39997	-0.360067	-1.18069	-0.372569	-0.589623	-0.754381	-0.0957848	-0.213318	-0.0786394	-0.217291	0.041898	0.0451837	0.186614	0.0446496	0.0232177	0.0476995	0.0338697
2791	GNG11	-0.360396	0.103349	-3.48717	0.000488166	0.036106	0	2.4492	0.874109	-2.13688	-0.804052	0.100577	-1.62214	-1.73726	-1.74695	-0.827908	-0.548416	-0.250053	0.0419879	-0.329759	-0.395239	-0.663944	-0.23977	0.0658657	0.0967152	0.174281	0.0413256	0.0517596	0.144445	0.0838739
155038	GIMAP8	-0.33008	0.0947233	-3.48468	0.00049273	0.0361715	0	3.21336	0.781631	-2.57236	-0.00635166	-1.08052	-0.990055	-1.01259	-0.63844	-2.27125	-0.476351	-0.00203484	-0.456869	-0.283184	-0.188762	-0.225612	-0.536144	0.0342919	0.102632	0.17878	0.0818121	0.034751	0.124878	0.0557226
719	C3AR1	0.389578	0.112026	3.47757	0.000505988	0.0368696	0	2.17049	0.903369	1.40448	1.78711	1.58189	2.04029	0.635157	0.793538	1.18294	0.457773	0.613271	0.679047	0.48229	0.162395	0.233153	0.347728	0.106235	0.117762	0.184266	0.0558769	0.0653709	0.0863268	0.0864074
10460	TACC3	0.327429	0.0942732	3.47319	0.000514311	0.0372005	0	6.18953	0.402297	0.400056	1.58691	0.878168	2.70675	1.16019	-0.462868	2.53389	0.0999755	0.419577	0.36968	0.605203	0.223348	-0.138067	0.533611	0.0624521	0.069907	0.177213	0.0499928	0.0370596	0.0889747	0.0443481
51728	POLR3K	-0.282765	0.0814904	-3.46991	0.000520626	0.0373825	0	4.47011	0.613329	-2.46955	-0.220849	-1.8018	-0.8889	-2.12263	-0.56519	-1.2253	-0.511013	-0.0600503	-0.780147	-0.147986	-0.365071	-0.135943	-0.266109	0.0428182	0.0739334	0.187474	0.0277162	0.0295807	0.0578527	0.0471667
4150	MAZ	-0.273204	0.0788277	-3.46583	0.000528594	0.0376256	0	5.46386	0.485835	-0.307684	-1.72569	-0.951947	-2.39136	-0.777202	-0.423467	-2.64481	-0.066695	-0.390442	-0.401338	-0.490808	-0.12987	-0.0828455	-0.492765	0.0469868	0.0511902	0.177744	0.0421245	0.0279222	0.0382735	0.0347129
254428	SLC41A1	-0.284227	0.0820816	-3.46274	0.000534711	0.0376256	0	6.14089	0.407594	-1.6279	-0.452585	-2.30997	-2.59099	-1.47345	-0.000737585	-1.19256	-0.444405	-0.135747	-1.02555	-0.418288	-0.242521	-0.000149217	-0.244365	0.0745249	0.0899626	0.197107	0.0260627	0.0270911	0.0409274	0.0419875
5494	PPM1A	-0.548696	0.158563	-3.46043	0.000539311	0.0376256	61.9727	18.4078	0.0052899	-0.270868	-0.864875	-1.93102	-6.31792	-1.71958	-0.771166	-5.23059	-0.0717991	-0.328216	-0.840852	-0.871856	-0.298128	-0.229871	-1.06622	0.0702622	0.144017	0.189613	0.0190432	0.030058	0.0888534	0.0415524
25874	MPC2	-0.406678	0.11785	-3.4508	0.000558922	0.0387191	31.1336	10.1646	0.117889	-2.21324	-0.385693	-3.42846	-2.92414	-1.28103	-0.557654	-1.86906	-0.451846	-0.0913522	-1.65864	-0.485242	-0.228999	-0.196191	-0.497177	0.0416797	0.056099	0.234049	0.0275374	0.0319555	0.123774	0.0707582
55344	PLCXD1	-0.334151	0.0969384	-3.44705	0.000566746	0.0389366	0	3.15995	0.78852	-2.03161	-0.978991	-1.43026	-0.806068	-2.5645	-0.379758	-0.734802	-0.499857	-0.298329	-0.61076	-0.237751	-0.504023	-0.116638	-0.145056	0.0605354	0.0928608	0.182352	0.0869964	0.0386274	0.0943333	0.0389702
3796	KIF2A	-0.345288	0.100214	-3.44551	0.000569977	0.0389366	19.3212	8.67639	0.192612	0.23069	-1.38536	-2.22464	-1.24366	-2.65492	-1.45089	-2.85336	0.0444589	-0.332518	-0.983	-0.216807	-0.422523	-0.409392	-0.635157	0.0371415	0.0576109	0.195249	0.030391	0.0253278	0.0796181	0.0495507
1173	AP2M1	-0.388024	0.112751	-3.44143	0.000578652	0.0392565	31.145	10.1663	0.117822	-2.216	-1.63926	-2.21778	-3.97394	0.686735	-0.172137	-2.60623	-0.465356	-0.345985	-0.979607	-0.583555	0.167441	-0.057944	-0.505913	0.0440991	0.0445468	0.195104	0.0215636	0.0594495	0.113311	0.0376815
23344	ESYT1	-0.450729	0.13106	-3.43911	0.000583634	0.0393234	44.1337	12.5299	0.0511388	-2.00655	-1.89321	-2.04559	-4.85942	-2.33513	-0.692077	0.363765	-0.423175	-0.441545	-0.895583	-0.8871	-0.429665	-0.243628	0.0832831	0.0444776	0.0543945	0.191679	0.0333254	0.0338561	0.123921	0.0524171
8788	DLK1	-0.42951	0.125264	-3.42884	0.000606167	0.0405637	1.21761	7.08628	0.312941	0.399918	-0.346868	-2.21849	-3.20725	-0.770997	-2.19408	-1.04008	0.17527	-0.151846	-0.979957	-0.775188	-0.242703	-0.528589	-0.240937	0.192075	0.191637	0.195119	0.0584181	0.0990932	0.0580404	0.0536625
10116	FEM1B	0.310253	0.0906072	3.42416	0.00061671	0.0409904	0	6.21214	0.39985	0.00303112	1.61947	-0.00192878	1.96633	1.51025	0.141485	3.13439	0.000716356	0.47042	-0.00080512	0.430436	0.384011	0.0314431	0.528831	0.0558535	0.084377	0.174242	0.0479186	0.0646526	0.0493887	0.0284661
7511	XPNPEP1	-0.48729	0.142536	-3.41871	0.000629193	0.0415394	62.9043	18.8701	0.00438874	-2.61417	-2.62521	-1.61242	-6.02819	-2.76496	-1.05578	0.313232	-0.471309	-0.545395	-0.692927	-1.03281	-0.427515	-0.335509	0.0604352	0.0325045	0.0431613	0.18468	0.0293543	0.0239071	0.100986	0.0372262
5021	OXTR	-0.324508	0.0950008	-3.41585	0.00063583	0.0416977	0	5.58487	0.471259	-0.657379	-0.278052	-0.906935	-2.32485	-0.592197	-0.976371	-3.03513	-0.207113	-0.100898	-0.382007	-0.712563	-0.124384	-0.182146	-0.601632	0.0992618	0.131678	0.177415	0.0939414	0.0441162	0.0348023	0.0392923
162	AP1B1	-0.439987	0.129023	-3.41014	0.000649291	0.0420299	54.4604	15.3712	0.0175578	-0.620999	-2.02502	-2.3847	-4.20764	-1.09155	-0.345904	-4.04056	-0.134847	-0.46584	-1.06333	-0.801873	-0.167992	-0.0785736	-0.696426	0.0471522	0.0529193	0.198822	0.036319	0.023686	0.0515991	0.0297075
92799	SHKBP1	0.320683	0.0940419	3.41	0.000649626	0.0420299	0	5.92674	0.431447	0.242717	0.686611	2.57555	1.86778	2.35969	0.551624	1.0149	0.0615572	0.18752	1.16215	0.440083	0.444041	0.178503	0.209785	0.0643215	0.0745887	0.203603	0.0555159	0.0354108	0.104714	0.0427268
80018	NAA25	-0.270721	0.0795064	-3.40503	0.000661579	0.0420299	0	4.17191	0.653425	-0.0834086	-0.34444	-1.05841	-2.86736	-2.13621	-0.498634	-1.21922	-0.0213281	-0.0938102	-0.447287	-0.453661	-0.374755	-0.0921842	-0.259223	0.0653854	0.0741776	0.178592	0.0250322	0.0307757	0.0341782	0.0452046
23178	PASK	-0.354743	0.104191	-3.40474	0.000662259	0.0420299	0	5.06708	0.535239	-1.23364	-1.34792	-1.58181	-2.08172	-0.863151	0.398207	-2.36249	-0.339257	-0.471623	-0.679008	-0.655946	-0.183691	0.123646	-0.49503	0.0756281	0.122422	0.184265	0.0992864	0.0452901	0.0964144	0.0439061
5198	PFAS	-0.279472	0.0821923	-3.40022	0.000673322	0.0424581	0	1.38553	0.966733	-0.721514	-0.753632	-0.464194	-1.12523	-2.36388	-0.783623	-2.04324	-0.146703	-0.193184	-0.194221	-0.37858	-0.356778	-0.176884	-0.369691	0.0413416	0.0657087	0.175062	0.113196	0.0227795	0.050952	0.032737
9147	NEMF	-0.377126	0.111104	-3.39434	0.000687942	0.0428188	39.3405	11.5398	0.0730583	-0.225136	-1.87962	-0.392814	-5.27885	-2.90255	-0.474459	-1.49964	-0.0549939	-0.499278	-0.164245	-0.827138	-0.326673	-0.124688	-0.321438	0.0596675	0.070558	0.174829	0.0245514	0.0126668	0.0690638	0.0459432
26036	ZNF451	-0.329855	0.0972251	-3.39269	0.000692101	0.0428188	0	6.74518	0.345057	-1.17377	-0.320711	-1.40285	-3.70253	-0.0707145	-0.6487	-1.7889	-0.27008	-0.0872829	-0.598526	-0.609156	-0.0162293	-0.165707	-0.487027	0.0529442	0.0740682	0.18203	0.0270683	0.0526723	0.0652523	0.0741196
900	CCNG1	-0.280495	0.0830738	-3.37646	0.000734254	0.0451037	0	6.69992	0.349492	-1.25175	0.609924	-1.95562	-2.32117	-1.36021	-0.835647	-2.45839	-0.226234	0.156122	-0.85253	-0.406414	-0.208786	-0.209147	-0.499485	0.0326646	0.0655206	0.190043	0.0306565	0.0235609	0.0626408	0.0412803
10211	FLOT1	0.295938	0.0876857	3.37498	0.000738203	0.0451037	0	5.3447	0.500421	-0.0314645	1.27671	2.0078	1.14467	1.38612	0.665062	2.72012	-0.00693773	0.326096	0.877434	0.211823	0.267301	0.262609	0.529204	0.0486174	0.0652386	0.190979	0.0342443	0.0371875	0.155918	0.0378504
29919	RMC1	0.259444	0.0769356	3.37222	0.00074564	0.0452769	0	4.80147	0.569516	1.59102	2.50118	1.16528	-0.145082	1.89456	-0.0991383	1.55178	0.262114	0.44201	0.493756	-0.0271947	0.31896	-0.0316367	0.339044	0.0271414	0.0312301	0.179542	0.035135	0.0283437	0.101836	0.0477367
3958	LGALS3	0.371478	0.110218	3.3704	0.000750588	0.0452978	4.35013	7.31836	0.292406	1.58387	2.10606	3.1308	1.08762	1.09577	0.433342	1.22526	0.377692	0.572457	1.47322	0.262416	0.250952	0.131494	0.273892	0.056864	0.0738828	0.221425	0.0582141	0.0524501	0.092076	0.0499689
1856	DVL2	-0.323852	0.0962477	-3.36478	0.000766057	0.0459205	12.0145	7.95586	0.241355	-1.21931	-0.536425	-1.81831	-3.60233	-1.09574	-0.52186	-1.83452	-0.279823	-0.13125	-0.787847	-0.773794	-0.177937	-0.112926	-0.348529	0.0526669	0.0598663	0.187736	0.0461407	0.0263705	0.0468252	0.0360938
63940	GPSM3	0.375002	0.111582	3.36076	0.00077727	0.0459205	12.6919	8.01759	0.236818	-0.518974	1.53684	2.39621	2.13445	2.91933	0.212041	1.71705	-0.134674	0.394101	1.06919	0.504244	0.545626	0.0824259	0.337223	0.0673408	0.0657596	0.199094	0.0558096	0.0349322	0.151109	0.0385719
6636	SNRPF	-0.465575	0.138566	-3.35995	0.000779579	0.0459205	49.9994	13.9998	0.0296379	-1.82012	-2.88698	-1.40692	-5.39187	-1.89164	-0.00564755	-0.499529	-0.411623	-0.811588	-0.600342	-0.92526	-0.316963	-0.00188849	-0.111524	0.0511447	0.0790285	0.182077	0.0294475	0.0280762	0.111817	0.0498445
2355	FOSL2	0.327103	0.0974388	3.357	0.00078792	0.0459926	0	6.58708	0.360726	1.4568	1.32151	2.53849	2.24625	0.920571	0.5719	1.44911	0.41289	0.461603	1.14268	0.61693	0.161643	0.11719	0.295944	0.0803284	0.12201	0.202628	0.0754317	0.0308317	0.0419894	0.0417075
3842	TNPO1	-0.48346	0.144072	-3.35569	0.000791664	0.0459926	62.7275	18.7806	0.00455064	-1.98601	-1.5672	-1.36628	-4.24321	-0.743774	-0.560017	-5.30925	-0.419311	-0.380291	-0.582253	-0.814793	-0.112053	-0.129882	-0.97052	0.0445768	0.0588825	0.181612	0.0368727	0.0226966	0.0537895	0.033415
81629	TSSK3	0.304669	0.0909394	3.35024	0.000807421	0.0461917	0	4.78408	0.57179	1.97991	1.26344	0.571754	0.393515	-0.13899	1.77665	2.61425	0.497158	0.37395	0.239516	0.15359	-0.0278322	0.315593	0.525472	0.0630518	0.0876027	0.17549	0.152337	0.0400986	0.031554	0.0404022
3566	IL4R	0.314443	0.0938592	3.35016	0.000807662	0.0461917	0	5.09118	0.532173	1.46055	1.4869	2.4994	1.70898	1.61583	0.361877	0.247393	0.317576	0.406632	1.12229	0.387216	0.313491	0.134163	0.0543622	0.0472785	0.0747895	0.201624	0.0513372	0.037641	0.137449	0.0482858
116225	ZMYND19	-0.483498	0.144458	-3.34698	0.00081697	0.046454	59.3918	17.2379	0.00844764	-4.62132	-0.953253	-0.356262	-5.38615	-1.97595	-1.20599	-0.841405	-0.838854	-0.250657	-0.148918	-1.08294	-0.36769	-0.257227	-0.185813	0.0329489	0.0691421	0.174725	0.0404255	0.0346269	0.0454927	0.0487689
3084	NRG1	0.465643	0.139191	3.34535	0.000821801	0.0464601	54.1289	15.2602	0.018327	2.05395	4.17099	2.39988	1.51534	0.0248504	0.611396	3.49081	0.383686	0.925064	1.07106	0.503587	0.00587006	0.104771	0.635966	0.0348956	0.0491887	0.199181	0.11044	0.055798	0.0293656	0.0331906
9217	VAPB	-0.263889	0.0790759	-3.33716	0.000846383	0.0473061	0	5.4547	0.486949	-0.412441	0.039813	-0.959683	-0.301315	-2.81909	-0.505841	-2.68417	-0.11821	0.0118869	-0.404666	-0.0694702	-0.433201	-0.0865431	-0.449974	0.0821449	0.0891432	0.177802	0.0531563	0.0236136	0.029271	0.0281032
26354	GNL3	-0.404884	0.121424	-3.33448	0.000854605	0.0473081	50.015	14.0042	0.0295892	-2.02943	-1.99501	-2.56334	-4.61905	-1.32328	-0.676642	-0.58321	-0.394525	-0.460862	-1.15572	-0.8247	-0.215505	-0.1641	-0.0969315	0.0377923	0.0533645	0.203279	0.0318777	0.0265221	0.0588166	0.0276235
25915	NDUFAF3	-0.421165	0.126427	-3.33129	0.000864452	0.0473081	47.6016	13.3592	0.0376736	-2.60343	-3.50827	-2.78708	-1.63055	0.109902	-0.525849	-2.4859	-0.530413	-0.714257	-1.27612	-0.299161	0.0189058	-0.169177	-0.485469	0.0415084	0.0414498	0.209644	0.0336622	0.0295922	0.103505	0.0381379
126731	CCSAP	0.283584	0.0851459	3.33056	0.000866718	0.0473081	0	3.96435	0.681502	0.858172	1.2224	-0.351606	0.697841	2.09123	0.793538	2.68564	0.2038	0.325783	-0.146966	0.193911	0.360071	0.141252	0.570539	0.0563975	0.0710284	0.174712	0.077213	0.0296463	0.0316852	0.0451309
80776	B9D2	0.370023	0.111107	3.33033	0.000867446	0.0473081	23.2688	9.12276	0.166791	0.395307	0.600025	2.20411	4.12026	1.78491	0.412029	1.57787	0.085191	0.176856	0.972854	0.732704	0.34863	0.11175	0.339898	0.0464429	0.0868766	0.194817	0.0316233	0.0381504	0.0735601	0.046404
9112	MTA1	-0.301318	0.0905034	-3.32936	0.000870466	0.0473081	7.91457	7.60164	0.268765	-2.87582	-2.55985	-0.957367	-1.86815	0.192778	-0.83282	-1.2164	-0.566271	-0.568347	-0.403669	-0.338115	0.0322694	-0.247658	-0.213177	0.0387725	0.0492943	0.177785	0.0327569	0.0280199	0.0884303	0.0307132
286451	YIPF6	-0.460608	0.138475	-3.32629	0.000880115	0.0475697	42.1264	12.0953	0.0598755	-1.95598	-0.0729267	-0.979981	-4.91686	-1.07557	-0.466604	-3.13922	-0.500956	-0.019815	-0.413406	-0.90953	-0.200585	-0.196018	-0.723149	0.065595	0.0738269	0.177958	0.0342183	0.0347791	0.176479	0.0530656
57544	TXNDC16	-0.333828	0.10041	-3.32465	0.000885296	0.0475883	0	6.60646	0.358778	-0.0445026	-1.20849	-2.41484	-1.83774	-2.1321	-0.476359	-1.80146	-0.0136039	-0.391182	-1.0787	-0.472711	-0.40187	-0.0852796	-0.497962	0.0934453	0.104779	0.199538	0.0661639	0.0355269	0.0320495	0.0764088
10128	LRPPRC	-0.283862	0.0854764	-3.32094	0.000897138	0.0477393	4.20154	7.30701	0.293386	-0.0140636	-0.932067	-2.16061	-2.55596	-0.981739	-1.71368	-2.14027	-0.00260194	-0.221013	-0.951459	-0.415125	-0.142384	-0.400623	-0.484943	0.0342294	0.0562267	0.193922	0.0263784	0.0210345	0.0546526	0.0513388
23028	KDM1A	-0.308208	0.0928131	-3.32073	0.000897811	0.0477393	9.16994	7.7067	0.260388	-0.739542	-2.662	-2.05259	-2.28179	-0.279418	-0.831755	-1.8331	-0.129612	-0.484936	-0.898957	-0.538096	-0.0441159	-0.253504	-0.397252	0.0307159	0.0331859	0.19181	0.0556118	0.0249277	0.0928918	0.0469632
23569	PADI4	0.366457	0.110578	3.31401	0.000919697	0.0484414	0	5.9035	0.434087	2.98959	0.58026	2.11473	1.47997	0.832642	0.492772	0.115159	0.677942	0.169706	0.929056	0.468379	0.183224	0.205533	0.0382161	0.0514235	0.0855363	0.193006	0.100159	0.0484228	0.173969	0.110129
249	ALPL	0.342195	0.103319	3.31203	0.000926203	0.0484631	0	4.34613	0.629945	1.02232	1.41592	2.47239	1.16662	2.03462	0.770932	0.240925	0.227399	0.402392	1.10829	0.434398	0.369106	0.343571	0.0656278	0.0494774	0.080765	0.200945	0.13865	0.0329106	0.19861	0.0742012
160760	PPTC7	0.300155	0.0907527	3.30739	0.000941692	0.0490128	1.92375	7.1373	0.308336	0.343552	-0.0213698	1.74665	2.86056	2.51271	-0.327217	1.99915	0.0785262	-0.00580648	0.754541	0.535957	0.355178	-0.0948524	0.397913	0.052245	0.0738287	0.186619	0.035104	0.0199806	0.0840281	0.0396173
6646	SOAT1	0.290767	0.0881566	3.2983	0.00097273	0.0503618	0	4.98125	0.54622	1.49737	2.05472	0.780843	0.704363	1.6791	-0.146028	2.33441	0.43536	0.678677	0.328124	0.147262	0.316487	-0.0312054	0.432805	0.0845352	0.109099	0.176583	0.0437106	0.0355268	0.0456657	0.034374
57580	PREX1	0.309915	0.0941752	3.29083	0.000998919	0.0514073	0	6.17305	0.404087	2.00848	1.04589	2.73014	0.984968	1.04347	0.126882	1.62692	0.499907	0.275858	1.24494	0.253057	0.184798	0.0383623	0.33479	0.0619503	0.0695659	0.207935	0.0660072	0.031364	0.0914135	0.0423463
5899	RALB	0.333591	0.101408	3.28958	0.00100337	0.0514073	0	6.95839	0.324712	1.87277	0.391887	2.88281	2.15137	1.14054	0.262976	1.26393	0.364876	0.099282	1.32942	0.542558	0.212316	0.118522	0.272626	0.0379595	0.0641831	0.212663	0.0636006	0.0346531	0.203128	0.0465253
64428	NARFL	-0.235831	0.0717505	-3.28682	0.00101327	0.0516452	0	2.39359	0.880182	-2.13971	-0.155911	-0.448001	-1.66443	-1.53061	-0.521238	-1.73453	-0.402895	-0.0308271	-0.187416	-0.272561	-0.220331	-0.119113	-0.31643	0.0354545	0.0390942	0.175006	0.0268162	0.0207215	0.052221	0.0332807
55739	NAXD	-0.309167	0.0941588	-3.28347	0.00102538	0.0519933	1.71204	7.12193	0.309718	-1.78215	-2.2567	-0.652644	-2.13969	0.248452	-0.350479	-2.55776	-0.335734	-0.531292	-0.273699	-0.550393	0.0470307	-0.0863192	-0.502264	0.0354899	0.0554267	0.175871	0.0661671	0.0358327	0.0606582	0.0385606
7702	ZNF143	0.265683	0.0809643	3.28148	0.00103263	0.0520583	0	5.91636	0.432625	1.97833	0.911558	0.5399	3.07953	0.527638	-0.113603	1.36873	0.425566	0.19771	0.226084	0.608994	0.0913226	-0.0305297	0.245119	0.0462738	0.0470424	0.175354	0.0391072	0.0299561	0.0722218	0.0320713
201627	DENND6A	0.248347	0.0758089	3.27596	0.00105303	0.0525822	0	4.39514	0.623366	1.33956	0.792227	0.286198	1.75435	0.455468	0.924895	2.91247	0.340905	0.231199	0.119572	0.272204	0.0751252	0.152672	0.570102	0.0647651	0.0851672	0.174553	0.0240745	0.0272055	0.0272481	0.0383163
29992	PILRA	0.35086	0.107158	3.27423	0.00105951	0.0526383	16.65	8.39832	0.210349	0.562343	2.03625	2.71464	2.90316	1.84464	0.21296	0.456724	0.106516	0.493899	1.23652	0.514977	0.391862	0.075132	0.106242	0.0358781	0.058832	0.207481	0.0314653	0.0451275	0.124467	0.0541107
9150	CTDP1	0.268401	0.0821544	3.26703	0.00108681	0.0534545	0	3.10926	0.795014	2.01525	0.334086	0.964433	2.0904	1.85445	0.33264	0.872005	0.395315	0.0788582	0.40671	0.484491	0.316596	0.0745067	0.171858	0.0384797	0.0557158	0.177838	0.053717	0.0291462	0.0501697	0.038842
122416	ANKRD9	-0.37349	0.114635	-3.25807	0.00112172	0.0548975	0	6.64797	0.354632	-1.51743	-0.434568	-1.81233	-3.05626	-0.0214862	0.0602402	-1.96264	-0.475727	-0.151826	-0.785054	-0.634726	-0.00526236	0.0222135	-0.499009	0.098287	0.12206	0.18764	0.0431314	0.0599848	0.135976	0.0646453
5087	PBX1	-0.336395	0.103328	-3.25562	0.00113146	0.0550026	0	5.2712	0.50953	-2.21504	-0.386778	-1.80566	-2.47456	-0.766183	-0.536125	-0.745575	-0.654834	-0.13071	-0.781947	-0.571577	-0.161654	-0.11976	-0.284165	0.0873973	0.114207	0.187535	0.0533522	0.0445149	0.0498989	0.145265
3678	ITGA5	0.305911	0.0939965	3.2545	0.00113594	0.0550026	0	3.03574	0.804348	0.448268	2.46655	0.652956	1.22548	1.8015	0.352934	1.42989	0.0916647	0.596488	0.273831	0.349561	0.402207	0.125019	0.279564	0.0418148	0.0584822	0.175873	0.0813645	0.0498464	0.125478	0.0382261
83483	PLVAP	-0.389205	0.119654	-3.25276	0.00114289	0.0550026	0	3.11286	0.794554	-1.03325	-0.991238	-2.26542	-1.31674	-0.785146	-0.914349	-1.82339	-0.382969	-0.361736	-1.00326	-0.349588	-0.189092	-0.301688	-0.596412	0.137378	0.133177	0.196123	0.0704877	0.0580022	0.108866	0.106988
80174	DBF4B	-0.244383	0.0751662	-3.25123	0.00114905	0.0550026	0	5.54239	0.476349	-1.43886	-2.16678	1.02404	-0.699173	-0.4643	-0.741269	-2.65427	-0.249746	-0.41309	0.432414	-0.176487	-0.105873	-0.123956	-0.419724	0.0301273	0.0363463	0.178307	0.0637175	0.0519965	0.027963	0.0250057
57711	ZNF529	-0.279141	0.0858829	-3.25026	0.00115301	0.0550026	0	6.2896	0.391543	-0.365351	-0.856153	-1.0583	-3.5323	-1.37996	-1.10496	-0.0772492	-0.0760397	-0.205009	-0.447239	-0.633029	-0.237613	-0.276619	-0.0189431	0.0433172	0.0573383	0.178591	0.0321168	0.0296486	0.0626719	0.0601332
124935	SLC43A2	0.323741	0.0996569	3.24855	0.00115993	0.0550026	0	3.33306	0.766031	0.616901	2.45119	0.579356	1.55692	1.27887	0.268236	1.74074	0.156492	0.623821	0.242724	0.620296	0.249966	0.0790678	0.388957	0.0643504	0.0647689	0.175523	0.158733	0.0382042	0.0868888	0.0499271
153527	ZMAT2	-0.427307	0.131568	-3.2478	0.00116301	0.0550026	49.3519	13.8209	0.0317026	-3.53965	-0.670136	-1.61133	-2.2256	-0.434923	-0.46617	-4.12729	-0.747368	-0.151612	-0.692433	-0.363983	-0.0716304	-0.179424	-0.882676	0.0445809	0.0511848	0.184666	0.0267466	0.0271251	0.148139	0.0457374
56259	CTNNBL1	-0.356723	0.109926	-3.24513	0.00117398	0.0552559	41.4846	11.9627	0.0628071	-2.63638	-3.02215	-0.357649	-5.63585	-0.199214	-0.511819	-0.180634	-0.400103	-0.617086	-0.149499	-0.660138	-0.0469099	-0.140179	-0.0405647	0.0230318	0.0416925	0.174728	0.0137199	0.0554485	0.075012	0.050431
1084	CEACAM3	0.554809	0.1713	3.23882	0.00120025	0.055857	51.7251	14.5003	0.0245206	1.20198	1.3443	3.82492	1.24054	2.28114	0.0789907	3.65197	0.295865	0.44419	1.9334	0.56392	0.46559	0.0204338	0.84988	0.0605894	0.109181	0.255504	0.20664	0.0416585	0.0669186	0.0541577
124540	MSI2	-0.316498	0.0978204	-3.2355	0.00121432	0.055857	10.2889	7.80283	0.252908	-2.59073	-2.24365	-2.14277	-1.61027	-0.640526	-0.951668	-0.374169	-0.578675	-0.524564	-0.942728	-0.406945	-0.121925	-0.214953	-0.0628397	0.0498912	0.0546622	0.193563	0.0638667	0.0362338	0.0510171	0.0282055
7706	TRIM25	0.350179	0.108284	3.23388	0.00122119	0.055857	17.0662	8.44047	0.207576	2.04352	1.59788	2.8275	2.22926	0.659536	-0.0361106	1.48472	0.445507	0.423748	1.29848	0.499057	0.107359	-0.0115281	0.319818	0.0475282	0.0703281	0.210896	0.0501162	0.026497	0.101917	0.0464
1649	DDIT3	0.378464	0.117074	3.2327	0.00122626	0.055857	28.131	9.73994	0.13604	1.83215	2.2112	-0.459189	3.69345	0.696796	0.28015	2.29468	0.389611	0.55369	-0.192117	0.814911	0.121777	0.0868364	0.530494	0.0452212	0.0627014	0.175045	0.0486805	0.0305436	0.0960776	0.0534462
4176	MCM7	-0.45992	0.14239	-3.22999	0.00123793	0.055857	52.1823	14.6389	0.0232588	-1.96486	-2.24926	-3.0566	-3.43162	0.464388	-0.628113	-2.82458	-0.457326	-0.716412	-1.42927	-0.613401	0.0911403	-0.170819	-0.520618	0.0541738	0.101449	0.218652	0.0319514	0.0385176	0.0739599	0.0339729
29967	LRP12	-0.295661	0.0915545	-3.22935	0.00124073	0.055857	0	5.76799	0.449675	0.108474	-0.292684	-1.78957	-0.265277	-1.76665	-1.82218	-2.52684	0.0301892	-0.086047	-0.774455	-0.0619916	-0.410199	-0.322366	-0.555808	0.0774549	0.0864318	0.187281	0.0546094	0.0539124	0.0312979	0.0483831
79188	TMEM43	0.284741	0.0881832	3.22897	0.00124237	0.055857	0.418457	7.02942	0.318135	0.605366	1.27536	2.47487	0.862698	2.53825	-0.139745	2.0395	0.116103	0.287885	1.10958	0.1355	0.421861	-0.0521632	0.430282	0.0367832	0.0509535	0.201007	0.0246695	0.0276228	0.139334	0.04451
1175	AP2S1	-0.378957	0.117508	-3.22495	0.00125995	0.0563371	33.3963	10.5099	0.104756	-1.573	-3.36342	-2.38498	-2.62373	0.328676	0.00474073	-1.98	-0.312567	-0.720989	-1.06347	-0.427973	0.0720801	0.0017093	-0.433018	0.0394848	0.0459512	0.198829	0.0266069	0.0480944	0.130002	0.0478281
117289	TAGAP	0.341428	0.106068	3.21894	0.00128665	0.0572704	0	6.5791	0.361529	0.216513	0.653978	1.5093	0.119235	2.35209	0.243631	3.20025	0.0504933	0.200592	0.646224	0.0450915	0.473326	0.0734713	0.671578	0.0543876	0.0940806	0.183321	0.143014	0.0404962	0.0909432	0.0440377
8328	GFI1B	-0.358901	0.11161	-3.21567	0.00130141	0.0576665	15.8626	8.31973	0.215602	-1.77765	-0.947891	-0.578784	-0.335298	-0.1951	-1.54463	-4.30162	-0.478975	-0.274181	-0.242483	-0.106752	-0.0422794	-0.313383	-0.763637	0.0725989	0.0836679	0.175521	0.101366	0.0469617	0.0411626	0.0315145
11164	NUDT5	0.290285	0.0903419	3.21318	0.00131273	0.0579009	6.87014	7.51639	0.275716	0.239928	2.9505	0.80668	1.37275	1.2997	0.126484	2.75759	0.0450746	0.677129	0.339134	0.23471	0.255348	0.0295294	0.532638	0.0352942	0.0526687	0.176743	0.0292334	0.0385994	0.0545052	0.0373083
7187	TRAF3	0.26176	0.0814963	3.21193	0.00131847	0.0579009	0	4.11526	0.661082	1.00106	0.6687	0.961997	2.13682	0.403921	1.12201	2.46353	0.216441	0.181972	0.405662	0.522681	0.0671577	0.202254	0.479615	0.0467474	0.0740537	0.17782	0.0598324	0.0276439	0.0324939	0.0379028
1653	DDX1	-0.397199	0.123739	-3.20998	0.00132744	0.0579207	49.7821	13.9392	0.0303222	0.562942	-1.84725	-1.84347	-4.55211	-3.87519	-0.451634	-1.47176	0.102476	-0.417154	-0.799612	-0.688628	-0.563658	-0.149585	-0.33437	0.0331376	0.0509968	0.188142	0.0228846	0.0211566	0.109699	0.051616
9816	URB2	-0.261508	0.081503	-3.20857	0.00133398	0.0579207	0	3.35007	0.763799	-1.24531	0.0775074	-2.00166	-1.45801	-1.69205	-1.37085	-1.10157	-0.291033	0.0196555	-0.874494	-0.26992	-0.317395	-0.256115	-0.219458	0.0546171	0.0643105	0.190867	0.0342725	0.0351864	0.034905	0.0396902
83861	RSPH3	0.324125	0.101076	3.20675	0.00134243	0.0579207	15.1647	8.25129	0.220265	2.45996	1.73789	1.3881	1.3665	1.06865	-0.736646	2.85202	0.487269	0.430874	0.591955	0.340893	0.211821	-0.152	0.546117	0.0392357	0.0614692	0.18186	0.0622322	0.0392889	0.0425764	0.0366663
9240	PNMA1	-0.527909	0.164625	-3.20674	0.00134248	0.0579207	62.5067	18.67	0.00475884	-0.694589	-0.457504	-3.48318	-3.10537	-2.47094	-0.428905	-4.39529	-0.168765	-0.149996	-1.6945	-0.687357	-0.49311	-0.0824958	-0.940746	0.0590351	0.107491	0.236662	0.0489934	0.0398258	0.0369948	0.0458109
639	PRDM1	0.344739	0.107586	3.20431	0.00135387	0.0581571	10.4847	7.81989	0.251598	1.99947	0.687701	2.88583	0.767958	1.80164	0.112644	2.12461	0.416234	0.175356	1.33112	0.271391	0.326936	0.0247465	0.522965	0.0433356	0.0650193	0.212762	0.124886	0.03293	0.0482629	0.060588
57706	DENND1A	0.372608	0.116361	3.20216	0.00136401	0.058233	36.721	11.0621	0.0864752	1.22434	1.53981	1.03544	1.26365	2.00921	0.192668	4.33583	0.301431	0.386988	0.437344	0.24315	0.345297	0.036608	0.998898	0.0606142	0.0631627	0.1784	0.0370252	0.0295349	0.036102	0.0530759
317649	EIF4E3	0.348135	0.108743	3.20143	0.00136747	0.058233	6.42698	7.48079	0.27866	2.15112	1.64325	2.83289	1.75326	1.07409	0.388007	0.349416	0.513341	0.445172	1.30148	0.427882	0.199508	0.132879	0.0784414	0.0569487	0.0733922	0.211065	0.0595605	0.0345015	0.117283	0.050397
9710	KIAA0355	-0.405432	0.126817	-3.19699	0.00138869	0.058629	45.937	12.9479	0.0438714	-1.4552	-1.25937	-0.770013	-5.3679	-1.71773	-0.0511753	-1.87317	-0.297673	-0.298304	-0.323513	-1.01784	-0.280412	-0.0165254	-0.377249	0.0418443	0.0561066	0.176518	0.0359545	0.0266491	0.104275	0.0405605
29101	SSU72	0.229625	0.0719184	3.19286	0.00140873	0.0588509	0	4.57898	0.598828	1.4624	2.70779	0.272202	-0.590129	1.67032	0.176536	1.43497	0.26139	0.485023	0.113715	-0.153679	0.205053	0.0620326	0.239351	0.0319484	0.0320845	0.174524	0.0678162	0.0150708	0.123474	0.0278218
9605	VPS9D1	0.300217	0.0940299	3.19278	0.0014091	0.0588509	0	5.23122	0.514518	0.277861	1.03806	0.2997	3.0698	0.924193	0.212454	1.96405	0.0680335	0.306319	0.125224	0.657387	0.186217	0.0610009	0.432299	0.05995	0.0870767	0.174583	0.0458586	0.0405987	0.0824411	0.0484464
221443	OARD1	-0.238727	0.0747965	-3.19168	0.00141447	0.0588509	0	5.70635	0.456875	-0.642714	-2.77956	-1.47621	-1.75008	-1.45905	-0.619115	0.00364695	-0.103561	-0.560468	-0.631342	-0.314265	-0.226316	-0.165817	0.000749892	0.0259629	0.0406583	0.182907	0.032246	0.0240596	0.0717326	0.0422802
64333	ARHGAP9	0.358638	0.112391	3.19099	0.00141788	0.0588509	13.0387	8.04956	0.234495	0.657974	0.625431	2.47761	0.887217	1.90281	0.122391	3.33749	0.126591	0.150035	1.11099	0.309705	0.366291	0.0500944	0.673683	0.037016	0.0575476	0.201075	0.121853	0.0370562	0.167524	0.0407446
84232	MAF1	-0.36249	0.113681	-3.18865	0.00142939	0.0590796	17.7952	8.51532	0.202726	-2.31866	-1.69997	-2.09378	-0.690318	-0.113588	-0.482141	-3.10445	-0.594788	-0.552041	-0.918873	-0.136081	-0.0234494	-0.154333	-0.576045	0.0658037	0.105453	0.192597	0.0388594	0.0426187	0.102463	0.0344304
11314	CD300A	0.40151	0.126055	3.18519	0.00144659	0.0593119	30.1408	10.0202	0.123806	1.17445	1.62303	3.54879	1.7392	0.932499	0.104029	2.41231	0.225469	0.357271	1.7383	0.455414	0.217756	0.0408436	0.505924	0.0368556	0.0484551	0.239931	0.0685672	0.0545312	0.154148	0.043985
6303	SAT1	0.350718	0.110209	3.1823	0.00146108	0.0593119	23.534	9.1544	0.165079	2.69089	3.24726	1.10964	2.18181	1.20579	0.204614	-0.216795	0.460862	0.7168	0.469518	0.590904	0.206365	0.09154	-0.0420942	0.0293324	0.048726	0.179035	0.0733499	0.0292907	0.200147	0.0377002
284207	METRNL	0.284864	0.0896027	3.1792	0.00147684	0.0593119	0	3.347	0.764201	1.75276	-0.151081	1.23231	1.29779	0.668716	0.722139	2.48752	0.441293	-0.057306	0.523102	0.266958	0.126111	0.179942	0.466599	0.0633882	0.143873	0.180191	0.042313	0.0355649	0.0620903	0.0351847
55313	CPPED1	0.418479	0.131676	3.17811	0.0014824	0.0593119	31.3529	10.1971	0.116594	0.453703	1.4925	2.79411	3.06535	2.15167	-0.353823	1.7759	0.124285	0.467129	1.27999	0.762756	0.408542	-0.0963055	0.409716	0.0750409	0.0979595	0.209859	0.0619171	0.0360514	0.074085	0.0532266
90407	TMEM41A	-0.250349	0.0788144	-3.17644	0.00149095	0.0593119	0	4.66983	0.586802	-1.80719	-1.59527	-2.05033	-0.365481	-1.65468	-0.891474	-1.03858	-0.451911	-0.53581	-0.897867	-0.0758419	-0.250335	-0.165836	-0.175288	0.0625316	0.112811	0.191768	0.0430615	0.0228886	0.0346051	0.0284857
120103	SLC36A4	0.294375	0.0926781	3.17632	0.00149156	0.0593119	0	3.08246	0.798428	1.65458	0.799853	1.15017	2.2508	1.50862	-0.115951	1.05627	0.453394	0.266616	0.487164	0.450983	0.276107	-0.027028	0.269462	0.0750889	0.111109	0.179402	0.0401464	0.0334962	0.0543348	0.0650795
1393	CRHBP	-0.297835	0.0938026	-3.17512	0.00149775	0.0593119	0	6.58219	0.361218	-0.608085	-0.646813	-0.79688	-1.29886	-0.592385	-1.12458	-3.62396	-0.151023	-0.179643	-0.334957	-0.436469	-0.114744	-0.195216	-0.733238	0.0616823	0.0771373	0.176681	0.112923	0.037519	0.0301338	0.0409376
734	OSGIN2	0.44499	0.140165	3.17477	0.00149957	0.0593119	44.5444	12.6227	0.0494342	1.36191	0.830147	3.76998	2.99322	1.68291	0.224018	1.90202	0.383482	0.263144	1.89308	0.668056	0.310445	0.0557875	0.378414	0.0792857	0.100479	0.25215	0.0498138	0.0340288	0.0620167	0.0395826
3034	HAL	0.509996	0.160687	3.17384	0.00150435	0.0593119	51.4596	14.421	0.0252714	2.85783	2.3192	3.24378	0.34042	1.40238	-0.0720506	3.06536	0.680963	0.6923	1.5418	0.0899874	0.292652	-0.0190308	0.833144	0.0567772	0.0891074	0.22592	0.0698767	0.0435481	0.0697651	0.0738715
5276	SERPINI2	0.283996	0.0894965	3.17326	0.00150737	0.0593119	0	5.82251	0.443363	1.15241	0.961418	1.50472	-0.987819	2.24156	0.603263	2.23858	0.296825	0.271853	0.644158	-0.415453	0.419565	0.10384	0.458237	0.066342	0.0799544	0.183263	0.176884	0.0350345	0.029629	0.041902
10725	NFAT5	-0.394471	0.124393	-3.17116	0.00151832	0.0593658	44.0452	12.5101	0.0515099	-0.422295	0.0776481	-1.64034	-3.99647	-0.723118	-1.51597	-4.17416	-0.126081	0.0222847	-0.705666	-0.668348	-0.119371	-0.360489	-0.729893	0.0891391	0.0823667	0.185068	0.0279675	0.0272507	0.0565461	0.0305759
58528	RRAGD	0.348768	0.110097	3.16783	0.00153583	0.0597151	9.71278	7.75304	0.256761	1.61918	1.43718	2.56653	0.0698151	1.50806	0.0874126	2.69086	0.369683	0.409717	1.1574	0.016388	0.277667	0.0289509	0.622968	0.0521279	0.0812727	0.203364	0.0551004	0.0339011	0.109693	0.053598
54899	PXK	0.290499	0.0917988	3.16452	0.00155342	0.0601612	0	5.49615	0.481922	0.976934	-0.0185578	2.41901	2.19737	1.21385	1.36344	0.736942	0.245036	-0.00596307	1.08084	0.546476	0.238756	0.271214	0.161633	0.0629112	0.103249	0.199638	0.0618493	0.0386882	0.0395687	0.0481056
9170	LPAR2	0.469151	0.148404	3.1613	0.00157065	0.0602979	44.0166	12.5037	0.0516302	0.468639	2.81158	2.23033	0.788047	1.91327	-0.200168	4.23208	0.114903	0.714634	0.985818	0.204776	0.422774	-0.0706003	0.962318	0.0601159	0.0646051	0.195369	0.0675236	0.0488275	0.124401	0.0517047
9895	TECPR2	0.358048	0.11327	3.16101	0.00157225	0.0602979	23.275	9.12349	0.166751	1.38849	1.47983	3.23301	1.90847	1.12107	1.02122	1.27175	0.406632	0.50383	1.53517	0.518556	0.160879	0.200256	0.263159	0.0857666	0.115916	0.225476	0.0738276	0.0205936	0.0384533	0.0428185
79071	ELOVL6	-0.4265	0.135113	-3.15662	0.00159609	0.0608556	18.4817	8.58703	0.19817	-1.47625	-0.459537	-3.241	-2.61536	-0.664902	-0.72422	-1.32042	-0.467339	-0.166911	-1.54009	-0.638641	-0.154418	-0.23878	-0.333067	0.100218	0.131925	0.225805	0.0596278	0.0539359	0.108707	0.0636262
9263	STK17A	-0.392205	0.124295	-3.15542	0.00160266	0.0608702	41.1044	11.8854	0.064574	-0.965326	-1.49881	-1.91872	-3.68817	-1.08513	-0.0979503	-2.70296	-0.275827	-0.483501	-0.835028	-0.793232	-0.156093	-0.0182969	-0.588402	0.0816441	0.104064	0.189401	0.0462571	0.0206919	0.0348936	0.0473883
64127	NOD2	0.328912	0.104364	3.15158	0.00162387	0.0614385	0	6.43992	0.375754	-0.0333825	1.78409	1.65212	1.07073	1.6703	-0.421678	2.70717	-0.00867143	0.470602	0.711053	0.343589	0.310419	-0.141258	0.633155	0.0674749	0.0695784	0.185234	0.102972	0.0345387	0.112218	0.0547001
4942	OAT	-0.494089	0.157015	-3.14676	0.00165091	0.0617476	41.183	11.9013	0.064207	-0.715138	-0.322884	-2.5031	-4.93503	-2.20566	0.0772279	-1.43663	-0.212156	-0.104736	-1.12422	-0.992703	-0.499482	0.032414	-0.40417	0.0880099	0.105219	0.201718	0.040463	0.0512818	0.176164	0.0791482
10574	CCT7	-0.376137	0.119596	-3.14507	0.00166046	0.0617476	54.1704	15.274	0.0182296	-2.27101	-2.84061	-2.07593	-5.18794	-0.299099	0.0339499	-1.14373	-0.354896	-0.644538	-0.910229	-0.680972	-0.0459852	0.0106663	-0.207307	0.0244211	0.051484	0.192254	0.0172293	0.0236378	0.0987068	0.0328537
10299	2019-03-06	-0.350156	0.111385	-3.14367	0.00166843	0.0617476	22.4832	9.03031	0.171881	0.00894151	-0.435633	-1.04266	-4.45198	-1.00374	-0.168755	-2.87828	0.00247414	-0.130256	-0.440469	-0.638377	-0.185774	-0.0571438	-0.60819	0.0765643	0.0894033	0.17846	0.0205611	0.0342551	0.114663	0.044649
4750	NEK1	-0.400793	0.127501	-3.14345	0.0016697	0.0617476	47.6496	13.3714	0.0375023	0.607615	-0.291611	-2.48766	-4.22979	-2.56773	-1.7195	-2.20509	0.146873	-0.0739979	-1.1162	-0.748648	-0.413487	-0.370285	-0.493813	0.0584291	0.0643917	0.201327	0.0313269	0.0259313	0.0463735	0.0501504
51393	TRPV2	-0.425694	0.135616	-3.13896	0.00169548	0.0624662	43.2186	12.328	0.0550393	-1.866	-1.86258	-3.31768	-1.75593	0.0762281	-0.742628	-2.86133	-0.375215	-0.412993	-1.58782	-0.408681	0.0154055	-0.222938	-0.719034	0.0404334	0.0491647	0.22905	0.0541695	0.0408436	0.0901207	0.0631485
239	ALOX12	-0.341723	0.108941	-3.13676	0.00170827	0.0624835	0	3.08281	0.798384	-1.31095	-0.920585	0.1327	-1.4483	-1.5074	-2.30342	-0.814125	-0.366199	-0.276059	0.0554028	-0.616792	-0.33307	-0.685625	-0.195722	0.07803	0.0899242	0.174309	0.181368	0.0488217	0.0885986	0.0577956
128346	C1orf162	0.357798	0.114074	3.13655	0.00170946	0.0624835	21.7301	8.94341	0.176786	0.911647	1.02828	1.77916	3.60853	1.6506	0.399386	1.28023	0.15811	0.224901	0.769615	1.11529	0.299867	0.16075	0.286625	0.0300789	0.0478362	0.187119	0.0955237	0.0330044	0.162	0.0501248
10397	NDRG1	0.27165	0.086634	3.1356	0.00171501	0.0624835	0	3.13086	0.792253	0.863295	2.38272	0.179702	1.38296	0.697862	0.603503	1.93497	0.193611	0.590091	0.075038	0.366268	0.120341	0.182326	0.339557	0.0502971	0.0613325	0.174365	0.0701418	0.0297362	0.0912721	0.0307948
10163	WASF2	-0.340985	0.108806	-3.13389	0.00172508	0.0625315	14.1653	8.15521	0.226952	-0.820871	-2.22794	-2.05411	-1.72135	0.335359	-0.524474	-2.93182	-0.193041	-0.514369	-0.899687	-0.333901	0.0707218	-0.205657	-0.605406	0.0553031	0.0533019	0.191839	0.0376265	0.0444719	0.153758	0.04264
1347	COX7A2	-0.382428	0.122056	-3.13321	0.00172904	0.0625315	40.923	11.8489	0.0654246	-1.21891	-3.45255	-3.1076	-1.73102	-1.68555	-0.203876	-0.77828	-0.243798	-0.87828	-1.45939	-0.247892	-0.273173	-0.0873752	-0.175667	0.0400054	0.0647122	0.220543	0.0205079	0.0262661	0.183672	0.050946
79726	WDR59	-0.430676	0.137547	-3.13111	0.00174148	0.062538	63.736	19.3029	0.0036815	-2.57883	-1.05747	-2.91514	-5.83586	-0.48296	-0.692603	-1.79094	-0.381791	-0.196822	-1.34769	-0.89702	-0.0863714	-0.206924	-0.34285	0.0219183	0.0346428	0.213726	0.0236263	0.0319829	0.089259	0.0366476
26227	PHGDH	-0.42167	0.134674	-3.13103	0.00174193	0.062538	44.4187	12.5942	0.049953	-1.25283	-2.45294	-1.15185	-3.61398	0.259737	-0.637502	-3.27367	-0.315551	-0.632449	-0.487897	-0.983234	0.0513514	-0.160108	-0.56451	0.0634391	0.066478	0.179417	0.0740188	0.0390873	0.0630755	0.0297354
9931	HELZ	-0.548235	0.175204	-3.12913	0.00175327	0.0627161	75.8136	28.9419	6.23974e-05	-2.02882	-5.1262	-0.440034	-7.51862	-1.04788	-0.776856	-2.15521	-0.348025	-0.955256	-0.184068	-1.2423	-0.192776	-0.260388	-0.400842	0.0294262	0.0347256	0.174979	0.027301	0.0338442	0.112347	0.0345912
22920	KIFAP3	-0.376539	0.120396	-3.1275	0.00176299	0.0628321	46.6666	13.125	0.0410938	-1.09868	-1.54541	-2.43878	-4.91977	-0.472339	-1.6795	-0.702714	-0.265045	-0.461265	-1.09097	-0.686641	-0.0775151	-0.383143	-0.124497	0.0581967	0.0890869	0.200117	0.0194791	0.0269318	0.052043	0.0313875
10220	GDF11	-0.267118	0.0854677	-3.12537	0.00177582	0.0628321	0	6.35368	0.384759	-0.166051	0.172912	-1.01471	-2.82201	-2.78007	-0.555542	-0.344818	-0.0457087	0.0556205	-0.428386	-0.519079	-0.434282	-0.113157	-0.0694404	0.0757728	0.103471	0.178232	0.0338337	0.0244025	0.0414884	0.040555
355	FAS	0.453409	0.145195	3.12276	0.00179163	0.0628327	53.4662	15.0428	0.0199262	0.882966	2.22757	3.89371	-0.05742	2.56851	1.30959	2.8235	0.248676	0.78053	1.98504	-0.0143299	0.469062	0.236808	0.474223	0.0793194	0.122777	0.259903	0.0622812	0.0333501	0.0326981	0.0282092
29890	RBM15B	-0.342582	0.109723	-3.12223	0.00179485	0.0628327	17.9706	8.53353	0.201561	-1.83981	-0.887972	-0.176652	-2.38056	-0.778058	-0.727342	-3.29918	-0.454431	-0.264795	-0.0737639	-0.885927	-0.111681	-0.162355	-0.666253	0.0610082	0.0889245	0.174361	0.138497	0.0206034	0.0498256	0.0407819
9595	CYTIP	0.285479	0.0916429	3.11513	0.00183865	0.0641377	0	4.02519	0.673267	0.244738	1.93385	1.34557	1.88681	1.55266	0.084907	1.4632	0.0806137	0.670503	0.573064	0.609826	0.243812	0.0242787	0.252187	0.108496	0.120214	0.181382	0.104461	0.0246581	0.0817644	0.0297058
80194	TMEM134	-0.339188	0.109037	-3.11077	0.00186598	0.0648609	39.5281	11.5756	0.0721338	-2.9688	-2.44033	-1.53992	-3.70834	0.124415	-0.291831	-0.868975	-0.547826	-0.562465	-0.660038	-0.545514	0.0196445	-0.076279	-0.175488	0.0340504	0.0531245	0.183713	0.0216398	0.0249307	0.06832	0.0407829
55741	EDEM2	0.394829	0.1272	3.104	0.00190927	0.0656921	38.5093	11.3838	0.0772138	0.168543	2.56199	1.63004	3.58805	0.544761	0.193849	2.81408	0.0352304	0.696218	0.700963	0.810771	0.118241	0.0569432	0.501273	0.0436933	0.0738477	0.184924	0.05106	0.0471113	0.0862894	0.0317304
7102	TSPAN7	-0.363388	0.117083	-3.10368	0.0019113	0.0656921	0	5.17622	0.521418	-1.26623	0.0897548	-1.54698	-2.3662	-0.370207	-0.457717	-2.20433	-0.546978	0.035856	-0.663226	-0.654109	-0.0851217	-0.159065	-0.558081	0.186601	0.159591	0.183805	0.0764181	0.0528678	0.120769	0.0640979
57727	NCOA5	-0.270385	0.0871208	-3.10356	0.00191207	0.0656921	0	4.68356	0.58499	-0.513483	-2.00211	-1.84326	-1.70081	-1.8723	-0.48658	-0.104573	-0.106425	-0.474438	-0.799511	-0.370176	-0.337253	-0.133844	-0.0232658	0.0429571	0.0561542	0.188138	0.0473703	0.032446	0.075664	0.0494992
9277	WDR46	-0.358351	0.115491	-3.10286	0.0019166	0.0656921	28.7498	9.82454	0.132238	-1.10056	-1.68755	-3.16461	-2.54962	-0.0877784	-0.743639	-1.88887	-0.234013	-0.4222	-1.49353	-0.508376	-0.0183724	-0.189491	-0.395747	0.0452118	0.0625926	0.222734	0.0397573	0.0438081	0.0649313	0.0438966
83699	SH3BGRL2	-0.331589	0.106918	-3.10135	0.00192642	0.0657992	0	1.74472	0.941617	-0.824071	-0.958104	-0.0205521	-1.50136	-1.15483	-1.56882	-1.92787	-0.225383	-0.287117	-0.00857896	-0.409059	-0.256278	-0.495227	-0.526197	0.0748022	0.0898031	0.174244	0.0742342	0.0492473	0.0996467	0.0744972
155435	RBM33	0.240672	0.0776302	3.10023	0.0019337	0.0658194	0	4.69002	0.584139	-0.215285	2.21021	0.709884	1.91878	1.54676	1.59683	0.492009	-0.0557046	0.65256	0.297959	0.41813	0.211521	0.288441	0.0918873	0.0669508	0.0871716	0.176172	0.0474868	0.0187008	0.0326282	0.034879
7295	TXN	0.27352	0.0883152	3.09708	0.00195435	0.0660467	0	1.85479	0.932557	1.53008	1.20293	-0.1942	1.45193	2.30549	0.172141	0.409626	0.330093	0.329019	-0.0810969	0.339387	0.337898	0.0711467	0.0995998	0.0465419	0.0748106	0.174385	0.0546384	0.0214805	0.170821	0.0591209
9766	SUSD6	0.426417	0.137807	3.09431	0.00197273	0.0660467	53.0526	14.9103	0.0209659	1.8838	1.90295	3.78786	2.9748	1.10583	-0.224406	1.82004	0.367464	0.445669	1.90611	0.674458	0.162594	-0.0774668	0.344619	0.0380503	0.0548491	0.253226	0.0514037	0.0216187	0.119169	0.0358523
79567	RIPOR1	0.268618	0.0868291	3.09364	0.0019772	0.0660467	0	4.54724	0.603047	0.414713	0.304838	1.60965	2.13131	1.09566	-0.115612	2.34641	0.105867	0.0672104	0.691666	0.377205	0.214898	-0.0385967	0.474892	0.0651664	0.048611	0.184642	0.0313229	0.038469	0.111453	0.0409621
5210	PFKFB4	0.286679	0.0926729	3.09344	0.00197848	0.0660467	0	5.40344	0.493203	1.85855	1.90396	2.46642	0.661109	0.860372	0.15538	0.780332	0.363192	0.484171	1.10521	0.206332	0.14896	0.0562826	0.181135	0.0381879	0.0646669	0.200797	0.0974068	0.0299754	0.131207	0.0538823
8208	CHAF1B	-0.261345	0.0845247	-3.09193	0.00198859	0.0660467	0	4.4035	0.622245	-0.113236	-0.795662	-0.637723	-3.03091	-1.40488	-0.646301	-1.15464	-0.0312703	-0.270167	-0.267385	-0.614919	-0.259201	-0.118549	-0.214036	0.07626	0.115294	0.175797	0.0411615	0.0340407	0.0336455	0.0343625
80304	WDCP	-0.260336	0.0842152	-3.09131	0.00199273	0.0660467	0	4.37804	0.62566	-0.21725	-1.01381	-0.404173	-2.9151	-1.75249	-0.959485	-0.454151	-0.0469295	-0.303028	-0.169012	-0.584364	-0.30199	-0.204895	-0.0964583	0.0466632	0.0893423	0.174863	0.0401846	0.0296943	0.0456023	0.0451105
58190	CTDSP1	-0.264257	0.0854893	-3.09111	0.00199409	0.0660467	3.14683	7.22744	0.300325	-0.123483	-2.03767	-0.713625	-3.39934	-1.05379	-0.0625978	-1.39692	-0.0294643	-0.536479	-0.299547	-0.594324	-0.140602	-0.0185692	-0.220515	0.0569346	0.069317	0.176193	0.0305672	0.0178024	0.0879973	0.0249193
124446	TMEM219	0.259027	0.0838303	3.0899	0.00200225	0.0660945	0	5.9462	0.429244	-0.170954	0.229056	0.752155	0.862764	2.48251	0.275256	2.80415	-0.0375428	0.0570279	0.315916	0.184162	0.403451	0.0771037	0.537595	0.0482275	0.0619856	0.176412	0.0455635	0.0264118	0.0784649	0.0367544
2635	GBP3	0.303741	0.0983957	3.08693	0.00202235	0.0662812	0	1.38129	0.966987	0.237143	0.751471	0.321922	1.30367	1.54523	2.05363	1.37155	0.0650566	0.243035	0.134529	0.448059	0.318765	0.389614	0.354536	0.0752596	0.104595	0.174636	0.118124	0.0425553	0.0359934	0.0668184
4047	LSS	-0.257053	0.0832789	-3.08665	0.00202428	0.0662812	0	5.16869	0.522367	0.0254747	-2.6217	-1.11806	-1.53768	-0.81382	-0.716474	-1.74125	0.00599865	-0.64503	-0.47318	-0.324013	-0.144226	-0.137178	-0.367827	0.0554484	0.0605332	0.17911	0.0444012	0.0314075	0.036658	0.0446235
387032	ZKSCAN4	-0.260133	0.0842923	-3.08608	0.00202812	0.0662812	0	5.38318	0.495687	-0.674289	-1.36172	0.166464	-3.12983	-0.735739	-1.16845	-0.931667	-0.145396	-0.41378	0.0695071	-0.666746	-0.139284	-0.218974	-0.189163	0.0464958	0.0923345	0.174347	0.0453816	0.0358389	0.0351205	0.0412241
51271	UBAP1	-0.278129	0.0902137	-3.083	0.00204925	0.0667499	0	6.15258	0.406318	-1.77236	-0.0922651	-1.9278	-1.32631	-0.708561	-0.423117	-2.56688	-0.349166	-0.0211322	-0.839328	-0.251511	-0.13264	-0.160578	-0.697639	0.0388113	0.0524585	0.189557	0.0359603	0.0350427	0.144029	0.073867
4724	NDUFS4	-0.399242	0.129683	-3.0786	0.00207978	0.0674214	56.4443	16.0714	0.0133759	-2.19224	-1.58286	-1.98802	-6.39758	-1.64219	-0.306758	-0.134135	-0.403446	-0.353539	-0.867971	-0.828146	-0.240411	-0.0960134	-0.0321207	0.0338684	0.0498869	0.19062	0.0167565	0.021432	0.0979651	0.0573441
56925	LXN	0.299692	0.0974285	3.07602	0.00209785	0.0676609	0	5.58904	0.470761	0.916099	2.21212	0.87728	2.75178	0.664464	0.230702	0.693923	0.211929	0.621454	0.3693	0.701515	0.140107	0.0628795	0.168256	0.0535176	0.0789222	0.177207	0.0649899	0.0444609	0.0742873	0.0587919
1116	CHI3L1	0.308253	0.100354	3.07164	0.00212884	0.0684358	0	6.14491	0.407155	1.42037	1.11812	1.76435	2.68775	0.860043	0.717012	0.926412	0.354659	0.299166	0.762742	1.05989	0.202703	0.122838	0.309806	0.0623474	0.0715891	0.18689	0.155503	0.0555493	0.0293503	0.111833
23198	PSME4	-0.382638	0.124662	-3.0694	0.00214493	0.0687285	24.3262	9.25023	0.159987	-1.89939	0.164003	-1.01792	-3.08738	-0.946895	-0.222323	-2.99845	-0.456883	0.046289	-0.42977	-0.712093	-0.156532	-0.0940481	-0.806234	0.0578604	0.0796619	0.178258	0.0531977	0.0273277	0.17895	0.0722985
79751	SLC25A22	-0.261761	0.0853143	-3.0682	0.00215356	0.068781	0	6.09205	0.412958	-0.695649	-1.05949	0.821056	-2.90201	-0.635746	-0.773333	-1.99859	-0.181469	-0.253243	0.345267	-0.58263	-0.119716	-0.155231	-0.406709	0.0680498	0.0571317	0.176834	0.0403076	0.03546	0.0402927	0.0414116
54955	C1orf109	-0.294534	0.0961469	-3.06338	0.00218854	0.0694473	0	3.69455	0.717931	-0.395917	-1.04069	-1.54163	-2.47749	-1.28197	-0.443367	-1.21838	-0.109847	-0.356353	-0.66081	-0.596983	-0.266659	-0.0940826	-0.28197	0.0769777	0.117252	0.183735	0.0580631	0.0432671	0.0450291	0.0535597
92370	PXYLP1	0.329688	0.107766	3.05931	0.0022185	0.0701718	25.7157	9.42326	0.151136	1.27171	0.684458	1.60556	2.57209	1.21284	-0.370632	3.40532	0.295986	0.188995	0.689805	0.455941	0.223462	-0.0753278	0.74887	0.0541709	0.0762441	0.184587	0.0314229	0.0339473	0.0413071	0.0483613
834	CASP1	0.401688	0.13137	3.05769	0.00223051	0.0702088	52.8097	14.8336	0.0215916	3.35283	3.84186	3.26965	0.172007	2.34753	0.0913943	0.311763	0.521561	0.668613	1.5578	0.0438146	0.379463	0.033931	0.061012	0.0241984	0.0302877	0.226998	0.0648852	0.0261285	0.137834	0.0382983
6760	SS18	-0.247763	0.0810416	-3.05723	0.00223395	0.0702088	0	2.05279	0.91478	-0.907522	-0.0569341	-1.33495	-1.48301	-1.27717	-0.647976	-2.13076	-0.261231	-0.0170635	-0.568359	-0.249409	-0.20143	-0.149765	-0.393894	0.0828579	0.0898232	0.181265	0.0282835	0.0248743	0.0534198	0.0341735
55160	ARHGEF10L	0.224626	0.0735241	3.05513	0.00224963	0.0702748	0	5.9276	0.431349	1.07351	1.14461	0.638929	2.70438	0.358693	0.170765	2.21791	0.195211	0.228118	0.267896	0.526539	0.0637892	0.027188	0.431405	0.0330674	0.0397193	0.175803	0.0379075	0.0316263	0.0253486	0.0378339
127544	RNF19B	0.560688	0.183529	3.05504	0.00225034	0.0702748	60.6014	17.7671	0.00684127	-0.410924	1.08507	4.14986	3.16578	2.99876	0.178835	3.22576	-0.140679	0.348995	2.19005	0.825285	0.536898	0.0588767	0.663196	0.117203	0.103449	0.27851	0.0679591	0.0320554	0.108388	0.0422689
3150	HMGN1	-0.454689	0.148938	-3.05288	0.00226655	0.0705571	62.6802	18.7568	0.00459474	-0.669377	-2.20041	-1.36361	-6.18006	-0.956939	-0.573976	-2.65369	-0.139319	-0.521422	-0.58107	-0.992422	-0.140345	-0.223912	-0.531133	0.0433189	0.0561531	0.181582	0.0257874	0.0215092	0.152184	0.0400595
84080	ENKD1	0.246263	0.0808433	3.04617	0.00231774	0.0718138	0	5.54073	0.476548	0.308044	1.12838	2.08812	2.75019	0.878552	0.352113	0.79507	0.0706438	0.281924	0.916131	0.451352	0.151903	0.0749804	0.177131	0.0525924	0.0624241	0.192488	0.0269343	0.029895	0.0453453	0.049634
23199	GSE1	-0.236029	0.077512	-3.04506	0.00232631	0.0718138	0	4.60655	0.59517	-2.23314	-0.654584	-1.23179	0.410973	-1.69589	-0.825418	-1.79444	-0.428353	-0.152577	-0.522875	0.0771565	-0.253842	-0.253897	-0.318548	0.0367935	0.0543308	0.180186	0.0352468	0.0224044	0.0946163	0.0315132
51204	TACO1	-0.286076	0.0939576	-3.04474	0.00232882	0.0718138	18.471	8.5859	0.19824	-2.83896	-2.6567	-1.65232	-0.924593	-2.09067	0.0863029	0.345809	-0.489354	-0.49184	-0.711145	-0.174258	-0.35836	0.0203887	0.0748405	0.0297117	0.0342739	0.185237	0.0355209	0.0293809	0.055812	0.0468383
54799	MBTD1	-0.33767	0.110982	-3.04256	0.00234578	0.0721107	9.2807	7.71611	0.259648	-0.0560374	0.831718	-0.148125	-2.42813	-2.09281	-0.784375	-3.30222	-0.0181692	0.327427	-0.0618457	-0.477069	-0.367686	-0.240586	-0.695478	0.105128	0.15498	0.174326	0.0386029	0.030867	0.0940787	0.0443562
8131	NPRL3	-0.431938	0.142228	-3.03694	0.00238991	0.0732385	44.1856	12.5416	0.0509218	-2.35881	-1.05318	-2.15357	-3.36414	0.433127	-0.401198	-2.87618	-0.575812	-0.283848	-0.948012	-0.663582	0.0859795	-0.129166	-0.752031	0.0595901	0.0726376	0.19378	0.0389083	0.0394058	0.103653	0.0683658
9043	SPAG9	0.366767	0.120811	3.03587	0.00239846	0.0732721	46.2919	13.0334	0.0425084	2.13898	1.35519	2.75173	3.80879	2.75607	-0.468095	0.0818016	0.428116	0.35737	1.25672	0.622027	0.409603	-0.131062	0.0154515	0.0400599	0.06954	0.208576	0.0266712	0.0220874	0.0783944	0.0356795
6595	SMARCA2	0.238441	0.0786614	3.03124	0.00243554	0.0737492	0	6.61294	0.358129	3.55938	1.09148	-0.212683	0.832113	1.37039	-0.56629	0.886465	0.542042	0.211307	-0.0888226	0.171083	0.193842	-0.182723	0.175754	0.0231908	0.0374798	0.174414	0.0422715	0.020008	0.104114	0.0393088
6041	RNASEL	0.331191	0.109287	3.03048	0.00244165	0.0737492	18.2013	8.5576	0.200029	3.52705	1.16839	1.73016	0.465243	1.65697	-0.458274	1.63245	0.704577	0.374261	0.746922	0.0936592	0.275892	-0.133947	0.402473	0.0399055	0.102606	0.186371	0.0405267	0.0277236	0.0854312	0.0607847
79663	HSPBAP1	0.290229	0.0957795	3.03018	0.00244406	0.0737492	0	6.87742	0.332333	1.16708	2.69909	1.96489	0.833736	1.7384	-0.575416	1.03243	0.267644	0.662122	0.856942	0.211575	0.288484	-0.158406	0.215269	0.0525916	0.0601784	0.190207	0.0643977	0.0275386	0.0757847	0.0434752
947	CD34	-0.362432	0.119761	-3.02628	0.00247579	0.0744781	16.178	8.35103	0.213497	-0.772752	-2.54247	-1.7097	-1.94547	-2.74567	0.606373	-0.374036	-0.189821	-0.653044	-0.737485	-0.517892	-0.586389	0.185405	-0.0930593	0.0603403	0.065974	0.186066	0.0708649	0.0456116	0.0934895	0.0619003
7454	WAS	0.287803	0.0951579	3.02448	0.00249059	0.074695	0	6.93402	0.326992	0.811321	-0.128678	2.31541	1.27542	2.68322	0.403212	1.65491	0.153131	-0.0264206	1.02828	0.32947	0.47369	0.164633	0.346086	0.0356236	0.0421578	0.197229	0.0667307	0.0311656	0.166713	0.0437339
2983	GUCY1B1	-0.278492	0.0922017	-3.02047	0.00252387	0.0752342	0	2.30412	0.889714	-1.23248	-1.26519	-0.567401	-0.270705	-2.20083	-1.07509	-1.38308	-0.355667	-0.414081	-0.23768	-0.0593895	-0.470645	-0.19605	-0.327145	0.083277	0.107118	0.175471	0.0481311	0.0457312	0.0332542	0.055948
5792	PTPRF	-0.306987	0.101706	-3.01838	0.00254126	0.0753138	0	6.20415	0.400714	-1.56924	-0.283506	-0.52643	-3.21762	-0.491386	-0.0822008	-1.51506	-0.460898	-0.095887	-0.220409	-0.717623	-0.10181	-0.0225135	-0.358766	0.0862642	0.114392	0.175299	0.049742	0.0429273	0.0750124	0.056074
51082	POLR1D	-0.476993	0.158033	-3.01831	0.00254185	0.0753138	60.9037	17.9045	0.00647526	-2.48221	-0.0394835	-2.66607	-3.00741	-0.82345	0.00339314	-5.13029	-0.520331	-0.00916043	-1.21031	-0.573019	-0.163995	0.001351	-0.987418	0.0439422	0.0538272	0.206087	0.036304	0.039663	0.158528	0.037044
5911	RAP2A	-0.477313	0.158436	-3.01266	0.00258971	0.0762338	54.3121	15.3213	0.0178993	-0.50419	-0.840657	-3.14662	-1.4557	-1.7548	-0.790093	-4.32982	-0.112299	-0.20921	-1.4827	-0.335227	-0.329134	-0.291587	-1.09466	0.0496095	0.0619334	0.222034	0.0530319	0.0351794	0.136201	0.0639175
27109	ATP5S	-0.287633	0.0955182	-3.01129	0.00260142	0.0762338	0	6.9416	0.326282	-2.01676	0.382235	-0.60727	-2.84639	-0.82168	-0.0233681	-2.16601	-0.523007	0.111482	-0.254511	-0.517885	-0.144503	-0.0059174	-0.47691	0.0672521	0.0850645	0.175651	0.0331039	0.0309277	0.0641233	0.048479
55876	GSDMB	-0.271665	0.0902352	-3.01063	0.00260704	0.0762338	0	4.05034	0.669864	-2.67216	-1.40979	-0.259529	-1.59455	-0.189854	-0.991658	-0.597434	-0.569591	-0.339057	-0.108413	-0.35385	-0.0389162	-0.283794	-0.128939	0.0454362	0.0578408	0.174498	0.0492448	0.0420167	0.0818997	0.0465791
11171	STRAP	-0.423728	0.140769	-3.0101	0.00261165	0.0762338	57.9336	16.6404	0.0106999	-1.12292	0.304102	-3.33913	-2.47175	-2.27802	-0.419094	-4.46476	-0.246069	0.0783596	-1.60135	-0.413428	-0.322074	-0.138505	-0.842709	0.0480191	0.0663968	0.229989	0.0279763	0.0199893	0.109221	0.0356253
3049	HBQ1	-0.370749	0.123248	-3.00815	0.00262843	0.0764967	0	6.75122	0.344469	-1.50622	-1.08426	-2.33897	0.195388	-0.387591	-0.186919	-2.86977	-0.488051	-0.352636	-1.04015	0.127634	-0.0808817	-0.0722838	-0.606526	0.104991	0.105776	0.197762	0.426713	0.0435465	0.149547	0.0446689
4790	NFKB1	0.261555	0.087154	3.00107	0.00269033	0.0780084	0	6.46708	0.372948	2.01689	-0.589926	0.226445	2.00254	2.10402	-0.242411	1.8823	0.343393	-0.116198	0.0945761	0.457062	0.418621	-0.0974407	0.354623	0.0289879	0.038797	0.174437	0.052094	0.0395859	0.161575	0.0354939
23492	CBX7	0.35744	0.119131	3.0004	0.00269624	0.0780084	46.2754	13.0294	0.0425714	0.461188	0.924077	1.67731	4.65158	1.835	-0.206233	2.61361	0.0857486	0.204642	0.722592	0.812016	0.289522	-0.0580827	0.504056	0.0345699	0.0490427	0.185593	0.0304739	0.0248938	0.0793188	0.0371942
838	CASP5	0.453625	0.151367	2.99686	0.00272777	0.0785453	33.6125	10.5442	0.103529	1.62657	2.12034	3.54979	0.807926	1.7495	0.672297	0.482684	0.456783	0.748023	1.73897	0.184712	0.457623	0.182147	0.163707	0.0788629	0.124457	0.239982	0.0522694	0.0684206	0.0734042	0.115029
3074	HEXB	0.336548	0.112313	2.99652	0.00273076	0.0785453	31.2544	10.1825	0.117175	3.55729	2.01608	0.706357	-0.777836	2.41154	0.0942506	2.16997	0.624294	0.410822	0.296462	-0.153713	0.416025	0.0375805	0.488098	0.0307992	0.0415234	0.176153	0.0390524	0.0297611	0.158985	0.0505947
9782		-0.209694	0.0701024	-2.99126	0.00277829	0.0795823	0	3.81191	0.702112	0.0311415	-0.49657	-1.38733	-2.91994	-1.26133	-0.438599	-0.52722	0.00886583	-0.173602	-0.591614	-0.358061	-0.171229	-0.135869	-0.077497	0.0810513	0.122221	0.181851	0.0150372	0.0184289	0.0959631	0.0216066
9782	MATR3	-0.209694	0.0701024	-2.99126	0.00277829	0.0795823	0	3.81191	0.702112	0.0311415	-0.49657	-1.38733	-2.91994	-1.26133	-0.438599	-0.52722	0.00886583	-0.173602	-0.591614	-0.358061	-0.171229	-0.135869	-0.077497	0.0810513	0.122221	0.181851	0.0150372	0.0184289	0.0959631	0.0216066
6647	SOD1	-0.324047	0.108408	-2.98914	0.00279763	0.0795823	12.1376	7.967	0.240531	-1.90745	-0.519314	-2.47931	-1.65763	-0.0786828	-0.144673	-2.67045	-0.415275	-0.13914	-1.11187	-0.325826	-0.0152364	-0.0617274	-0.568024	0.0473988	0.0717863	0.201118	0.0386362	0.037498	0.182045	0.0452443
54764	ZRANB1	-0.48687	0.162881	-2.98912	0.00279786	0.0795823	55.3333	15.6716	0.0156292	-1.25319	0.792092	-2.98922	-3.9618	-1.5449	-0.735561	-3.41055	-0.362658	0.264071	-1.39006	-0.767047	-0.257399	-0.246274	-0.853398	0.0837456	0.111145	0.216248	0.0374851	0.0277597	0.112099	0.0626115
4783	NFIL3	0.397274	0.132913	2.98897	0.00279917	0.0795823	23.8172	9.18843	0.163255	2.21746	1.78843	2.9232	1.56067	1.69003	0.299039	-0.146278	0.595377	0.647875	1.35226	0.339143	0.372093	0.110221	-0.034965	0.0720896	0.131231	0.213995	0.0472219	0.0484747	0.135854	0.0571357
51	ACOX1	0.271015	0.0907725	2.98565	0.00282974	0.0801202	0	6.41145	0.378711	1.57354	0.861543	1.96675	0.635386	2.85565	-0.219074	0.674672	0.394163	0.228619	0.857827	0.135484	0.489926	-0.049858	0.14801	0.0627472	0.0704162	0.19024	0.0454673	0.029434	0.051795	0.0481276
7263	TST	0.275395	0.0922551	2.98515	0.00283438	0.0801202	0	6.22497	0.398466	0.515333	2.85889	-0.110961	1.77999	1.70279	-0.486237	0.944174	0.103527	0.558613	-0.0463241	0.560956	0.328862	-0.154841	0.213324	0.0403582	0.0381793	0.174289	0.0993168	0.0372998	0.101409	0.0510476
55096	EBLN2	0.290781	0.0975129	2.98197	0.002864	0.0807255	0	4.7221	0.579917	1.74817	2.26153	1.1139	0.599897	0.758845	-0.650086	1.68656	0.345868	0.559798	0.47137	0.253316	0.159347	-0.191835	0.39816	0.0391429	0.0612712	0.179073	0.178309	0.0440943	0.0870794	0.0557327
6688	SPI1	0.355234	0.119242	2.9791	0.00289095	0.0812523	7.21241	7.54411	0.27344	-0.1747	1.0627	3.07394	1.30472	2.11546	0.349852	1.55594	-0.0526971	0.32819	1.43947	0.389394	0.390387	0.14102	0.328535	0.0909888	0.0953734	0.219288	0.0890731	0.0340548	0.162476	0.0445839
8625	RFXANK	-0.404165	0.135936	-2.9732	0.00294714	0.0825954	58.428	16.8383	0.00989642	-1.34308	-1.32754	-2.98911	-5.15955	-0.166314	-0.289399	-2.55679	-0.267011	-0.322978	-1.39	-0.734243	-0.0295183	-0.0732863	-0.496348	0.0395232	0.0591904	0.216244	0.0202515	0.0315011	0.0641288	0.0376862
2194	FASN	-0.353488	0.118931	-2.97221	0.00295668	0.0826274	37.3897	11.1803	0.0829623	-0.651101	-3.50566	-0.756165	-3.31877	-0.386016	-0.193383	-1.92127	-0.155704	-0.853973	-0.317621	-0.669439	-0.0671873	-0.0548201	-0.338374	0.0571876	0.05934	0.176436	0.0406882	0.0302945	0.0803609	0.0310184
64928	MRPL14	-0.484773	0.163279	-2.96898	0.0029879	0.0832634	63.7391	19.3045	0.0036791	-2.56308	-1.89305	-4.06445	-1.02376	-0.573507	-0.442838	-3.30344	-0.532486	-0.490488	-2.1193	-0.165319	-0.112762	-0.126769	-0.807977	0.0431611	0.0671326	0.271882	0.0260769	0.0386591	0.0819473	0.0598228
2033	EP300	-0.374323	0.126155	-2.96716	0.00300561	0.0834667	38.1028	11.3091	0.0792812	-1.4056	-1.05831	-0.642439	-2.69399	0.103191	-0.604811	-4.5412	-0.34324	-0.268549	-0.269381	-0.600172	0.0202565	-0.185883	-0.789058	0.0596313	0.0643904	0.17582	0.0496316	0.0385342	0.0944583	0.030191
3659	IRF1	0.396309	0.133595	2.96649	0.00301217	0.0834667	39.8397	11.6356	0.0706102	0.678412	1.26613	3.6136	1.40897	2.13179	-0.194772	2.67143	0.143843	0.304102	1.78247	0.437548	0.378305	-0.0668457	0.513652	0.044956	0.0576874	0.243312	0.0964374	0.0314918	0.117785	0.03697
51367	POP5	-0.313998	0.106035	-2.96127	0.00306373	0.084465	33.0575	10.4567	0.106689	-4.03928	0.564792	-1.47443	-1.7999	-1.18648	-1.84383	-0.758311	-0.682462	0.128635	-0.630544	-0.361711	-0.19031	-0.414207	-0.16005	0.0285462	0.051873	0.182886	0.0403855	0.025728	0.0504653	0.044547
4318	MMP9	0.380255	0.128501	2.95917	0.00308471	0.0847607	0	5.23843	0.513617	1.62972	0.0798337	2.50094	1.11746	1.70081	0.951266	-0.177947	0.510745	0.0327876	1.12309	0.418877	0.382805	0.44525	-0.0626412	0.0982163	0.168673	0.201663	0.14051	0.0506576	0.21908	0.123919
9500	MAGED1	-0.374269	0.126567	-2.95708	0.00310565	0.0848945	49.5003	13.8615	0.0312225	-3.02006	-1.86332	-2.85054	-3.68352	-0.278763	-0.0575768	-0.621863	-0.454409	-0.354669	-1.31133	-0.794006	-0.0539806	-0.0158656	-0.13476	0.0226394	0.0362304	0.211624	0.0464645	0.0374978	0.0759312	0.0469608
25923	ATL3	0.241494	0.0816695	2.95696	0.00310684	0.0848945	0	6.65301	0.354131	2.34461	0.240737	-0.465534	3.03181	1.2938	0.389823	0.356653	0.462439	0.0656652	-0.194784	0.509698	0.192059	0.0956035	0.06632	0.0389017	0.0744021	0.175067	0.0282631	0.0220363	0.0601467	0.0345778
146225	CMTM2	0.32193	0.108949	2.95488	0.00312792	0.0852336	0	4.50733	0.608362	-0.0937283	0.482051	2.11599	0.892908	2.15834	0.460504	1.68887	-0.0234428	0.166235	0.929669	0.48517	0.418205	0.202311	0.382761	0.0625572	0.118921	0.193031	0.295239	0.0375439	0.193006	0.0513644
10217	CTDSPL	-0.249857	0.0848626	-2.94425	0.00323735	0.0879718	0	4.41888	0.620184	0.00399498	0.0147086	0.136195	-1.88824	-1.39902	-1.6878	-2.16734	0.000942701	0.00375493	0.0568625	-0.351673	-0.243176	-0.45298	-0.442347	0.0556825	0.0651718	0.174313	0.0346867	0.0302132	0.0720306	0.0416555
122830	NAA30	-0.292846	0.0997533	-2.9357	0.00332796	0.0893125	4.03971	7.29468	0.294453	-0.222598	0.359521	-1.18798	-2.88049	-0.771694	-0.910859	-2.66532	-0.0607315	0.109	-0.503679	-0.592949	-0.153586	-0.181941	-0.564601	0.0744367	0.0919193	0.179757	0.0423744	0.0396106	0.0398987	0.044873
1314	COPA	-0.251155	0.0855572	-2.93552	0.00332994	0.0893125	1.89443	7.13517	0.308528	-2.8926	-0.379881	-1.1444	-2.60695	-0.176468	-0.455368	-0.855926	-0.485881	-0.07826	-0.484647	-0.496117	-0.026256	-0.170916	-0.16652	0.0282151	0.0424408	0.179349	0.0362163	0.0221375	0.140876	0.0378495
10445	MCRS1	-0.261504	0.0891284	-2.93402	0.00334607	0.0893125	0	4.87761	0.559603	-1.82472	-1.4295	-0.741035	-1.50053	0.491391	-0.539095	-2.18636	-0.371171	-0.475586	-0.311189	-0.296112	0.104125	-0.133409	-0.458585	0.0413765	0.110685	0.176348	0.0389425	0.0449008	0.0612402	0.0439942
7040	TGFB1	0.282871	0.0964264	2.93354	0.00335121	0.0893125	14.1667	8.15535	0.226942	-0.0216718	2.13557	-0.128395	-0.651994	1.96715	2.45876	2.62524	-0.00524833	0.453717	-0.0536045	-0.154679	0.390054	0.426002	0.472351	0.0586479	0.045138	0.174305	0.0562826	0.0393165	0.0300186	0.0323736
79673	ZNF329	-0.266272	0.0908485	-2.93095	0.0033793	0.0893125	0	5.12396	0.528016	-1.22249	-1.45728	-0.781507	-2.64366	0.439878	-0.640799	-1.37567	-0.278883	-0.394883	-0.328407	-0.526335	0.092544	-0.156775	-0.323027	0.0520418	0.073426	0.176587	0.0396382	0.044262	0.059856	0.0551378
5266	PI3	0.74823	0.25531	2.93067	0.00338236	0.0893125	62.0625	18.4514	0.00519784	0.437921	0.568845	4.93274	2.43845	2.41883	0.903202	1.77612	0.156862	0.253085	3.00008	0.709036	0.744473	0.345395	0.764137	0.128304	0.197946	0.369906	0.0845491	0.0947302	0.146238	0.185097
10221	TRIB1	0.406486	0.138742	2.92981	0.00339174	0.0893125	27.0426	9.59463	0.142794	2.34958	0.431422	2.83375	0.993365	0.103889	0.711709	2.77059	0.604153	0.128493	1.30196	0.324282	0.0212717	0.323893	0.591519	0.0661171	0.0887063	0.211092	0.106568	0.0419238	0.207109	0.0455821
5862	RAB2A	0.218331	0.0745228	2.92972	0.00339271	0.0893125	0	3.43607	0.752455	2.45565	0.900811	1.2195	1.67912	0.566436	0.422741	0.609488	0.442972	0.209584	0.517483	0.272806	0.0844892	0.103493	0.120021	0.0325402	0.0541312	0.180064	0.0263965	0.0222485	0.0599337	0.038778
54680	ZNHIT6	-0.365808	0.124873	-2.92945	0.00339564	0.0893125	47.3454	13.2942	0.038595	-0.497552	-1.29665	-1.16742	-5.81758	-1.6218	-1.41988	-0.308791	-0.103626	-0.308478	-0.494691	-0.815527	-0.305681	-0.375639	-0.0700289	0.0433768	0.0565982	0.179562	0.0196514	0.0355259	0.0699906	0.0514309
7086	TKT	0.467526	0.160158	2.91915	0.00350984	0.0919878	63.5479	19.2033	0.00383377	2.55028	0.402484	1.8582	6.28378	1.10705	0.0123778	2.15854	0.473503	0.0848014	0.806518	1.11987	0.260817	0.00497293	0.419637	0.0344723	0.0443925	0.188383	0.0317606	0.0555063	0.161413	0.0377946
100287932	TIMM23	-0.253808	0.0869623	-2.9186	0.00351605	0.0919878	0	5.14831	0.524937	-2.47155	-0.557509	-0.894176	-2.49483	0.142386	-0.444161	-0.0766101	-0.451844	-0.125984	-0.376537	-0.432643	0.0319909	-0.139552	-0.0205499	0.0334224	0.0510651	0.177325	0.0300731	0.0504799	0.0987173	0.0719527
23557	SNAPIN	-0.268312	0.0920697	-2.91422	0.00356573	0.0930401	2.35213	7.16862	0.305535	-0.0420664	0.370547	-1.24726	-3.36171	-1.05191	-0.534298	-1.99078	-0.0127172	0.131132	-0.529667	-0.575153	-0.167969	-0.102405	-0.403406	0.0913934	0.125237	0.180341	0.0292717	0.0254979	0.0367343	0.0410616
221504	ZBTB9	-0.354542	0.12174	-2.9123	0.0035878	0.0933683	31.302	10.1895	0.116894	-1.48251	-1.30673	-0.458291	-3.68936	0.154117	-1.3629	-1.95967	-0.38349	-0.391362	-0.19174	-0.996862	0.0281747	-0.304856	-0.374112	0.0669133	0.0896985	0.175042	0.0730076	0.0334206	0.0500336	0.0364449
201176	ARHGAP27	0.375029	0.128851	2.91056	0.00360787	0.0935752	45.1954	12.7726	0.0467918	1.45272	2.12705	2.51	2.29711	0.593696	-0.445665	2.99612	0.349576	0.63843	1.12781	0.551347	0.0957243	-0.0927665	0.554784	0.0579053	0.090089	0.201894	0.0576084	0.0259966	0.0433277	0.0342868
159013	CXorf38	0.245246	0.0842783	2.90996	0.00361478	0.0935752	0	4.6737	0.58629	0.672341	0.892952	1.42484	1.29586	0.903204	-0.308638	2.69661	0.151359	0.228466	0.608336	0.267923	0.142794	-0.0935402	0.528781	0.0506799	0.0654617	0.182287	0.042747	0.0249949	0.091854	0.0384516
8888	MCM3AP	-0.280852	0.0968854	-2.8988	0.00374588	0.0967145	28.7463	9.82405	0.13226	-3.70659	-0.601176	-1.65201	-3.06703	-0.0497476	-0.60223	-0.404437	-0.588308	-0.115274	-0.711004	-0.423834	-0.00931994	-0.169932	-0.0793925	0.0251919	0.0367668	0.185232	0.0190966	0.035098	0.079621	0.0385352
29090	TIMM21	-0.223178	0.0770155	-2.89783	0.00375757	0.0967622	0	4.13784	0.658029	0.309266	-1.16356	-1.13747	-2.64293	-1.54511	-0.641967	-0.0854659	0.0636371	-0.2849	-0.481628	-0.364694	-0.249942	-0.155131	-0.0221712	0.0423405	0.0599519	0.179285	0.0190408	0.0261674	0.0583949	0.0672965
678	ZFP36L2	0.245593	0.0848994	2.89276	0.00381878	0.0973188	0	4.6085	0.594912	-0.184375	-0.284221	-0.097521	1.35146	2.42385	-0.0436796	2.26911	-0.0514522	-0.108985	-0.0407118	0.273592	0.312557	-0.0154665	0.497034	0.0778757	0.147035	0.174278	0.0409827	0.0166283	0.12538	0.0479801
84658	ADGRE3	0.465133	0.160807	2.8925	0.0038219	0.0973188	42.5336	12.181	0.0580501	1.17843	0.935365	3.47526	2.64676	2.33016	0.284593	0.468778	0.269926	0.282243	1.68927	1.03665	0.496846	0.0904271	0.132234	0.0524665	0.0910506	0.236278	0.153405	0.0454646	0.10096	0.0795701
3399	ID3	-0.404653	0.139903	-2.89238	0.00382335	0.0973188	36.0994	10.9545	0.0897924	-1.64741	-1.04017	-2.20744	-4.29306	-0.69302	0.196632	-0.923666	-0.475111	-0.355352	-0.974496	-0.83904	-0.1409	0.0630716	-0.232275	0.0831738	0.11671	0.194887	0.0381972	0.0413362	0.102887	0.0632374
9612	NCOR2	-0.239129	0.0826835	-2.89209	0.00382684	0.0973188	0	3.06855	0.800195	-0.454777	-0.6386	-1.20742	-0.987015	-2.09039	-0.157727	-1.99786	-0.0922139	-0.127116	-0.512187	-0.175649	-0.429771	-0.0550023	-0.379622	0.0411146	0.0396224	0.179945	0.0316695	0.0422688	0.121605	0.0361053
84337	ELOF1	-0.327618	0.113286	-2.89195	0.00382864	0.0973188	9.65183	7.74781	0.257168	-1.45681	-0.445579	-1.98417	-2.35219	0.267771	-0.69786	-2.46246	-0.411701	-0.131399	-0.866134	-0.442859	0.053686	-0.216626	-0.670862	0.0798653	0.0869631	0.190551	0.0354475	0.0401971	0.0963576	0.074221
92400	RBM18	0.21912	0.0758407	2.88921	0.00386208	0.0979157	0	1.27385	0.97308	0.817594	1.20475	-0.067368	1.5829	1.87493	0.235965	1.1918	0.194647	0.305617	-0.0281224	0.241328	0.278407	0.0509439	0.23785	0.0566788	0.0643521	0.17426	0.0232439	0.0220491	0.0466109	0.0398292
3772	KCNJ15	0.401608	0.13934	2.88221	0.00394897	0.0991541	31.5426	10.2253	0.115478	1.90219	1.7665	3.61958	0.381957	1.51031	0.588017	0.805697	0.465784	0.521658	1.78659	0.140134	0.30074	0.156353	0.20583	0.0599598	0.0872058	0.243632	0.134604	0.0396506	0.0707023	0.0652641
3553	IL1B	0.394079	0.136737	2.88203	0.00395118	0.0991541	11.7161	7.92896	0.243354	0.665062	0.823126	3.43861	0.754051	1.74461	0.27256	1.61036	0.185906	0.301584	1.66524	0.327808	0.332636	0.129074	0.387822	0.0781377	0.13424	0.234526	0.188989	0.0363528	0.224262	0.0579986
121512	FGD4	0.477615	0.165743	2.88167	0.00395576	0.0991541	57.3178	16.4003	0.0117594	1.78593	1.13072	3.06826	4.30314	1.66498	0.59752	0.0289232	0.45122	0.371257	1.43613	1.09771	0.330456	0.128558	0.00746536	0.0638337	0.107805	0.219078	0.0650735	0.0393918	0.0462909	0.0666204
51267	CLEC1A	0.276345	0.0959382	2.88045	0.00397105	0.0991541	0	5.63467	0.465331	1.52074	2.52828	1.13032	0.835391	1.75731	-0.130625	0.382216	0.433949	0.726891	0.478514	0.209765	0.354432	-0.031171	0.0840413	0.0814263	0.0826585	0.17922	0.0630499	0.0406788	0.0569445	0.0483469
55527	FEM1A	-0.352716	0.122453	-2.88042	0.00397147	0.0991541	22.2868	9.00747	0.173158	-1.14472	-0.0867284	-2.76468	-1.63078	-1.28142	-0.185257	-2.74796	-0.265905	-0.0202199	-1.26381	-0.430521	-0.254745	-0.0631796	-0.697289	0.0539583	0.0543545	0.208964	0.0696948	0.0395208	0.116306	0.0643881
79814	AGMAT	-0.400939	0.139232	-2.87964	0.00398134	0.0991541	38.3841	11.3607	0.0778482	-0.910158	-0.612431	-2.27747	-2.90638	0.028791	-0.767337	-3.26706	-0.263401	-0.217261	-1.00927	-0.805852	0.00592992	-0.166653	-0.688149	0.0837529	0.125849	0.196387	0.0768789	0.0424214	0.0471684	0.0443659
5732	PTGER2	0.370217	0.128564	2.87963	0.00398148	0.0991541	31.2045	10.1751	0.11747	1.39634	1.07901	-0.247322	2.92486	1.44318	-0.294994	3.56017	0.326632	0.328472	-0.103307	0.961464	0.262708	-0.0857451	0.699567	0.0547185	0.0926712	0.174474	0.108058	0.0331363	0.0844872	0.0386116
55884	WSB2	0.444556	0.154588	2.87574	0.00403078	0.0998802	56.0344	15.9215	0.0141814	0.943614	0.827936	1.72942	4.37438	1.54871	-0.724922	4.13125	0.323578	0.367441	0.746578	0.681554	0.254463	-0.170987	0.94982	0.11759	0.196962	0.186359	0.0242754	0.0269966	0.0556346	0.0528589
8819	SAP30	0.324597	0.112905	2.87497	0.00404066	0.0998802	20.7167	8.8291	0.18342	2.40641	2.02003	0.274099	2.6867	0.132373	0.235965	1.65775	0.677636	0.675034	0.114509	0.591548	0.0212068	0.063388	0.326133	0.0792965	0.11167	0.174527	0.0484777	0.0256656	0.072164	0.0387036
10109	ARPC2	0.214081	0.0744888	2.87401	0.00405302	0.0998802	0	5.95543	0.428201	-0.234687	1.36878	2.17881	0.86566	1.61319	0.08443	2.04465	-0.0399867	0.240303	0.960392	0.172127	0.274034	0.0321833	0.317938	0.0290304	0.0308213	0.194294	0.039537	0.028856	0.145301	0.0241794
9943	OXSR1	-0.348473	0.121315	-2.87245	0.004073	0.0998802	47.0158	13.2115	0.0397977	-0.129971	0.0384118	-2.43697	-2.84479	-2.12089	-0.773196	-3.35138	-0.0214123	0.00749701	-1.09005	-0.484784	-0.363271	-0.292743	-0.679431	0.0271416	0.0380931	0.200073	0.02904	0.0293376	0.143349	0.0411001
9447	AIM2	0.289582	0.100831	2.87196	0.00407938	0.0998802	0	2.99712	0.809208	0.872906	1.53957	1.49973	-0.0207657	2.06131	0.448185	1.18893	0.196681	0.345738	0.64191	-0.00694387	0.497598	0.111709	0.355684	0.0507681	0.0504307	0.1832	0.111817	0.0582736	0.0621244	0.0894984
55755	CDK5RAP2	0.30921	0.107688	2.87135	0.00408729	0.0998802	21.4944	8.91657	0.178325	1.21543	-0.130024	0.555534	1.54525	1.69657	0.160806	3.98574	0.248964	-0.0296344	0.232675	0.353961	0.35179	0.0426257	0.753894	0.0419576	0.0519452	0.175419	0.0524702	0.0429955	0.0702647	0.0357768
10043	TOM1	0.286906	0.0999316	2.87102	0.00409152	0.0998802	18.3583	8.57405	0.198988	1.05451	1.86256	1.65275	-0.595972	1.61539	0.674683	3.14683	0.22374	0.449729	0.71134	-0.112369	0.260795	0.199542	0.572692	0.0450184	0.0583016	0.185243	0.03555	0.026064	0.0874723	0.0331203
374882	TMEM205	0.299641	0.104384	2.87058	0.00409726	0.0998802	22.7402	9.06034	0.170213	0.514362	0.420205	1.90093	4.68277	1.22887	0.177973	0.654936	0.118408	0.103363	0.826623	0.595511	0.241896	0.0604176	0.134802	0.0529942	0.0605071	0.189097	0.0161723	0.0387479	0.115244	0.0423639
29887	SNX10	0.39493	0.137596	2.87021	0.00410202	0.0998802	37.1597	11.1393	0.084164	2.09466	2.36904	3.06181	1.45173	1.5547	-0.100724	0.405476	0.517847	0.757655	1.43233	0.442477	0.284031	-0.0293781	0.0814361	0.0611187	0.102282	0.218842	0.0928983	0.0333763	0.0850712	0.0403371
171023	ASXL1	-0.339034	0.118168	-2.86909	0.00411656	0.0999868	46.0844	12.9833	0.0433026	-1.37117	-4.19498	-1.84282	-0.950853	-2.85204	-0.813876	0.447812	-0.269213	-0.878451	-0.799308	-0.207066	-0.358239	-0.208712	0.0913482	0.0385484	0.0438505	0.188131	0.0474231	0.0157773	0.0657623	0.041611
962	CD48	0.275572	0.0961525	2.86599	0.00415709	0.100722	0	3.97915	0.679498	0.893648	1.74981	1.78295	0.521145	0.617899	0.106649	2.11871	0.196588	0.508691	0.771376	0.217954	0.107608	0.0404905	0.426332	0.048393	0.0845133	0.187178	0.17491	0.0303287	0.144144	0.0404906
2799	GNS	0.258452	0.0903065	2.86194	0.00421061	0.101768	0.855583	7.06041	0.315297	3.08095	-0.165767	1.71887	1.12885	1.76089	0.159581	0.563832	0.630258	-0.0365712	0.741709	0.188395	0.270996	0.0644066	0.131037	0.0418473	0.0486723	0.186202	0.0278527	0.0236845	0.162892	0.0540121
91875	TTC5	-0.306832	0.107267	-2.86045	0.00423043	0.101997	33.5759	10.5383	0.103736	-3.23274	-1.63196	-0.796194	-3.12232	0.106968	-0.985652	-0.388476	-0.634082	-0.379881	-0.334664	-0.566245	0.0164103	-0.223929	-0.0839728	0.0384725	0.0541844	0.176677	0.0328893	0.0235356	0.0516146	0.0467249
51024	FIS1	-0.353133	0.123541	-2.85844	0.00425731	0.102333	24.7795	9.30598	0.157087	-2.35937	0.221511	-1.43892	-2.8981	0.217565	-0.165945	-2.97588	-0.61075	0.0630316	-0.61463	-0.48118	0.05432	-0.0619803	-0.671117	0.0670089	0.0809706	0.182455	0.0275668	0.0623366	0.139502	0.0508589
2879	GPX4	-0.336974	0.117917	-2.85772	0.00426703	0.102333	32.8084	10.418	0.108119	-3.04431	-2.92719	-1.28482	-1.90591	0.941268	-0.126021	-1.64482	-0.570777	-0.57448	-0.546205	-0.343404	0.196449	-0.0490162	-0.409494	0.0351525	0.0385166	0.180728	0.0324645	0.0435585	0.151284	0.0619807
2919	CXCL1	0.341546	0.119592	2.85592	0.00429119	0.102333	2.80118	7.20173	0.302593	0.624555	1.65403	2.14989	2.4701	1.30509	0.917221	0.252531	0.204406	0.678656	0.946208	1.00018	0.255714	0.203544	0.0624626	0.107114	0.16835	0.193706	0.163955	0.038391	0.0492459	0.06118
7108	TM7SF2	-0.527672	0.184789	-2.85554	0.00429637	0.102333	72.1621	25.1456	0.000320895	-1.27407	-1.10475	-2.24107	-5.47414	0.0797138	-0.846326	-4.59913	-0.341671	-0.324201	-0.991145	-1.11869	0.0133351	-0.219415	-0.839231	0.0719164	0.0861197	0.195598	0.0417625	0.027985	0.0672135	0.0332975
7728	ZNF175	-0.329545	0.115466	-2.85404	0.00431671	0.102569	16.6952	8.40287	0.210048	-1.10653	-0.557671	-2.79928	-2.66315	-1.64201	-0.163685	-0.621199	-0.309947	-0.194152	-1.28285	-0.618613	-0.296285	-0.034773	-0.15994	0.0784598	0.121207	0.210018	0.053957	0.0325587	0.0451304	0.0662904
5329	PLAUR	0.334963	0.117476	2.85134	0.00435354	0.102935	8.03365	7.61148	0.267971	0.751882	0.156388	3.02402	1.44678	2.16031	0.472382	1.07619	0.155246	0.0491515	1.41023	0.417343	0.46429	0.195047	0.243866	0.0426325	0.0987797	0.217476	0.0832112	0.0461899	0.170488	0.0513476
55790	CSGALNACT1	0.365361	0.128151	2.85102	0.00435789	0.102935	28.3274	9.76663	0.13483	1.03077	2.69014	1.84092	1.06781	1.56096	-0.919236	2.62194	0.262155	0.82589	0.798418	0.288261	0.31423	-0.244671	0.584107	0.0646833	0.0942529	0.1881	0.0728766	0.0405241	0.070845	0.0496296
2051	EPHB6	-0.280344	0.0983454	-2.85061	0.00436353	0.102935	0	5.4761	0.48435	-0.313211	-0.653579	-0.350517	-2.87739	-0.0480454	-0.837892	-1.99253	-0.0912559	-0.214937	-0.14651	-0.660095	-0.0102112	-0.219603	-0.435378	0.0848883	0.10815	0.174709	0.0526278	0.04517	0.068691	0.0477442
3045	HBD	0.784364	0.275352	2.84859	0.00439139	0.103345	66.6608	20.9963	0.00183744	0.51213	1.1595	4.73232	0.344919	2.84782	0.375929	4.1408	0.184182	0.475084	2.75757	0.234473	0.599731	0.166918	1.36132	0.12934	0.167881	0.339551	0.462116	0.0443495	0.197149	0.108081
9070	ASH2L	-0.401028	0.140889	-2.84641	0.00442157	0.103629	58.5131	16.8728	0.00976224	-0.845177	-0.432464	-2.38128	-5.49442	-1.67631	-0.543812	-1.62021	-0.151853	-0.0908016	-1.06158	-0.929293	-0.293083	-0.203279	-0.322712	0.0322813	0.0440845	0.198742	0.0286064	0.0305682	0.13973	0.0396725
5980	REV3L	0.354332	0.124493	2.84619	0.00442455	0.103629	45.4688	12.8367	0.0457037	1.14569	-0.523752	1.67233	4.40112	2.50515	0.592903	1.31245	0.328875	-0.212402	0.720308	0.946906	0.339153	0.103117	0.230547	0.0823993	0.164463	0.185522	0.0462899	0.0183283	0.0302481	0.0308568
5694	PSMB6	-0.323955	0.113922	-2.84366	0.00445992	0.10421	31.2618	10.1836	0.117131	-1.60047	-2.99273	-2.6206	-1.88128	0.0864818	0.472627	-1.64029	-0.310368	-0.618926	-1.18601	-0.29724	0.0190338	0.161509	-0.371209	0.0376061	0.0427705	0.204821	0.0249636	0.0484395	0.116776	0.051215
23731	TMEM245	-0.43249	0.152148	-2.84256	0.00447533	0.104322	50.931	14.2656	0.0268058	-0.891805	-0.155471	-2.89858	-0.781143	-2.35081	-0.678561	-3.97809	-0.216538	-0.0487309	-1.33831	-0.128966	-0.450779	-0.273576	-0.97203	0.0589559	0.0982452	0.213179	0.0272579	0.0367699	0.162546	0.0597049
1503	CTPS1	-0.325796	0.114648	-2.8417	0.0044874	0.104356	34.2019	10.6386	0.100209	-0.603899	-3.34782	-2.39582	-1.34517	-2.24892	-0.321198	-0.26824	-0.131859	-0.836439	-1.06899	-0.283178	-0.363378	-0.0746822	-0.0558409	0.0476749	0.0624228	0.199085	0.0443166	0.0261077	0.0540615	0.043337
5641	LGMN	-0.430313	0.151533	-2.83973	0.00451524	0.104756	62.4755	18.6545	0.00478873	-2.03913	-1.99923	-2.59069	-4.53037	-1.67895	0.587978	-0.846291	-0.403148	-0.450419	-1.17014	-1.08139	-0.282624	0.122137	-0.19301	0.0390875	0.0507581	0.204008	0.056977	0.0283365	0.043149	0.052014
9902	MRC2	-0.370583	0.130549	-2.83864	0.0045306	0.104865	37.8529	11.2636	0.0805635	-1.63131	-1.05788	0.315821	-4.03809	-0.383349	-1.71078	-1.62082	-0.467839	-0.3531	0.131974	-0.974261	-0.0630085	-0.360394	-0.383026	0.0822463	0.111409	0.174621	0.0582102	0.0270152	0.0443778	0.055845
10576	CCT2	-0.339116	0.119581	-2.83586	0.0045703	0.105535	34.1116	10.624	0.100715	-0.77935	-0.822453	-2.99181	-3.26728	-1.4848	-0.50064	-0.726743	-0.164031	-0.197761	-1.39156	-0.7277	-0.253286	-0.153008	-0.14819	0.0442982	0.0578172	0.216339	0.0496056	0.0290997	0.0934071	0.0415792
23070	CMTR1	-0.227715	0.0803212	-2.83505	0.00458186	0.105554	0	3.44213	0.751653	-0.0288337	-0.287815	-1.10261	-1.9592	-1.17358	-0.825286	-2.06963	-0.00761787	-0.078202	-0.466461	-0.381708	-0.177137	-0.144907	-0.476449	0.069802	0.0738256	0.178973	0.037958	0.0227823	0.0308299	0.0529965
51207	DUSP13	0.233066	0.082249	2.83367	0.00460173	0.105663	0	4.14947	0.656457	0.749985	1.43772	1.5711	0.633386	0.364581	0.811943	2.42651	0.136327	0.327107	0.67415	0.197604	0.0902022	0.122576	0.513615	0.0330413	0.0517644	0.184122	0.0973319	0.0612135	0.0227908	0.0448036
374969	SVBP	-0.415771	0.146748	-2.83323	0.00460807	0.105663	47.0745	13.2261	0.0395822	-1.12321	-0.460777	-2.62312	-4.53085	-0.195597	-0.30539	-2.36192	-0.258708	-0.110103	-1.18735	-0.77496	-0.0458645	-0.11551	-0.650219	0.053051	0.0570971	0.20489	0.029255	0.0549832	0.143063	0.0757857
7798	LUZP1	-0.30985	0.10955	-2.82838	0.00467848	0.107028	25.7377	9.42605	0.150997	-0.222602	-2.38535	-0.604734	-3.56177	-2.04688	0.362183	-0.780106	-0.0490578	-0.550895	-0.25344	-0.752601	-0.326195	0.102285	-0.171093	0.0485688	0.0533377	0.175639	0.0446477	0.0253963	0.0797572	0.0481014
84290	CAPNS2	0.26921	0.0952642	2.82593	0.0047144	0.1076	0	6.14535	0.407106	-0.445975	2.25019	2.02337	0.619351	1.35725	1.55487	0.60768	-0.111993	0.631812	0.8849	0.294892	0.251039	0.274678	0.158918	0.0630609	0.0788379	0.191265	0.226701	0.0342109	0.0312078	0.0683907
8266	UBL4A	-0.299169	0.105902	-2.82496	0.00472865	0.107675	29.1681	9.88256	0.129686	-0.813767	-3.00751	-0.453347	-2.45337	0.632903	-0.987252	-2.44282	-0.17074	-0.606128	-0.189662	-0.473583	0.111001	-0.252283	-0.472575	0.0440223	0.0406177	0.175024	0.0372621	0.0307597	0.065301	0.0374248
9792	SERTAD2	-0.338676	0.119926	-2.82404	0.00474219	0.107734	30.6492	10.0936	0.120765	-1.29647	-0.538594	-2.38556	-1.45691	-0.542932	-0.366163	-3.49865	-0.286561	-0.124818	-1.06376	-0.284816	-0.0977487	-0.128747	-0.846282	0.0488549	0.0537074	0.198842	0.0382179	0.0324138	0.123631	0.05851
7100	TLR5	0.40266	0.142649	2.82272	0.0047618	0.107831	45.4009	12.8207	0.0459729	2.20364	2.12777	3.33963	2.74116	1.22423	0.0657794	-0.323108	0.464785	0.616944	1.60167	0.531995	0.244239	0.0214722	-0.0834349	0.0444858	0.0840704	0.230011	0.0376657	0.0398019	0.106555	0.0666808
6895	TARBP2	-0.362793	0.12858	-2.82154	0.00477932	0.107831	62.1649	18.5013	0.00509422	-3.06231	-2.87686	-2.9603	-0.483915	0.231835	-0.609278	-3.46646	-0.528969	-0.616202	-1.37343	-0.0745205	0.0394555	-0.121115	-0.537502	0.0298374	0.0458783	0.215249	0.0237145	0.0289639	0.0395152	0.024043
57542	KLHL42	-0.246291	0.0874055	-2.8178	0.00483544	0.108847	0	6.62907	0.356516	-0.965765	-0.472239	-1.78073	-1.12743	-3.07659	-0.780431	0.501595	-0.192608	-0.111128	-0.770343	-0.209607	-0.492517	-0.206508	0.120368	0.0397746	0.0553762	0.187143	0.034565	0.0256273	0.0700174	0.0575862
10838	ZNF275	-0.28678	0.101895	-2.81445	0.00488604	0.10961	28.1697	9.7452	0.135801	-2.309	-2.91999	-1.87893	-1.39994	0.453796	-0.98361	-0.879028	-0.421698	-0.597229	-0.816257	-0.292339	0.0718001	-0.222103	-0.179374	0.0333547	0.0418331	0.188727	0.0436068	0.0250339	0.0509874	0.0416404
10670	RRAGA	-0.366232	0.130143	-2.81409	0.00489162	0.10961	53.4727	15.0449	0.01991	-1.07777	-0.839834	-2.38101	-5.70846	-1.50126	-0.154209	-0.877588	-0.199542	-0.178801	-1.06145	-0.794511	-0.266489	-0.0546511	-0.184573	0.0342781	0.0453264	0.198735	0.0193715	0.0315099	0.125596	0.0442339
81573	ANKRD13C	-0.299174	0.106404	-2.81169	0.00492825	0.110048	23.2624	9.122	0.166832	0.0130742	-0.356253	-3.18894	-1.87674	-2.26745	-0.774927	-1.48256	0.0032654	-0.110483	-1.50826	-0.359324	-0.361948	-0.156474	-0.304506	0.0623794	0.0961778	0.223695	0.0366578	0.025481	0.0407722	0.0421861
6322	SCML1	-0.237235	0.0843849	-2.81134	0.00493352	0.110048	0	2.11753	0.908578	-0.651865	-1.35224	-0.0840819	-2.29877	-0.930987	-0.981656	-0.803661	-0.143879	-0.28608	-0.0351004	-0.500531	-0.174609	-0.190342	-0.202783	0.048717	0.0447574	0.174269	0.0474101	0.0351762	0.0375966	0.0636671
54623	PAF1	0.322036	0.114593	2.81026	0.00495017	0.110169	43.2756	12.3404	0.0547923	0.214815	3.43565	0.189919	1.59924	1.02181	0.27525	3.88791	0.0419817	0.794599	0.0793078	0.222825	0.194871	0.0790673	0.672708	0.0381937	0.0534906	0.174379	0.0194134	0.0363708	0.0825163	0.0299379
166929	SGMS2	0.24528	0.0874021	2.80634	0.00501081	0.111267	0	2.59188	0.858046	0.957629	1.58269	1.0165	1.93409	1.05632	0.363456	1.01172	0.257808	0.527955	0.42916	0.426895	0.212338	0.0684384	0.187764	0.0724764	0.111276	0.178246	0.0487182	0.0404075	0.0354566	0.0344437
29068	ZBTB44	-0.260193	0.0927856	-2.80424	0.00504357	0.111742	1.63792	7.11656	0.310202	-0.114289	0.787839	-1.65593	-2.0927	-2.96502	-0.156998	-1.22209	-0.0323063	0.277126	-0.712795	-0.417356	-0.431695	-0.0351323	-0.227471	0.0799033	0.123732	0.185288	0.0397738	0.0211982	0.0500751	0.0346455
84316	NAA38	-0.265847	0.0948714	-2.80219	0.00507576	0.112063	0	6.30328	0.390088	-1.3734	-1.3757	-2.72213	-1.2212	-0.614103	-0.509445	-1.04057	-0.332482	-0.392328	-1.24059	-0.373934	-0.10162	-0.126263	-0.226742	0.0586062	0.0813299	0.2077	0.0937604	0.0273825	0.0614266	0.0474812
1052	CEBPD	0.265529	0.0947906	2.80122	0.00509103	0.112063	0	5.13712	0.52635	0.630384	2.07377	2.33155	1.09753	1.15216	0.491212	0.276738	0.132099	0.500983	1.03641	0.245322	0.239807	0.222991	0.0645606	0.0439123	0.0583614	0.197593	0.049962	0.0433206	0.20608	0.054425
54471	MIEF1	-0.334527	0.119425	-2.80114	0.00509224	0.112063	47.5255	13.3398	0.037946	-1.60899	-3.49468	-2.07098	-2.91179	-0.128348	-1.18763	0.127847	-0.323617	-0.76331	-0.907832	-0.468303	-0.0191036	-0.293213	0.0279714	0.0404534	0.0477074	0.192159	0.0258663	0.022154	0.0609542	0.0478679
80005	DOCK5	0.386452	0.138016	2.80006	0.00510936	0.112189	45.7674	12.9074	0.044531	0.325854	2.66274	3.26451	1.97011	1.5526	-0.18278	1.6767	0.0733637	0.724027	1.55461	0.513785	0.282637	-0.0448949	0.356479	0.0506892	0.0739354	0.226782	0.0680112	0.0331388	0.0603301	0.0452018
10425	ARIH2	-0.362139	0.129383	-2.79896	0.00512672	0.11232	57.9365	16.6415	0.0106951	-3.77659	-1.28363	-2.86301	-0.735306	-0.12886	-0.519159	-3.1455	-0.64594	-0.274894	-1.3183	-0.105841	-0.0205107	-0.152018	-0.60491	0.029254	0.045862	0.212023	0.020719	0.0253351	0.0857412	0.036983
389541	LAMTOR4	0.243127	0.0869226	2.79705	0.00515718	0.112736	0	4.53234	0.605029	-0.180857	0.651528	1.55494	0.751732	2.32168	0.180745	1.86891	-0.0407912	0.168896	0.666831	0.142178	0.416433	0.0640056	0.371079	0.0508703	0.0672007	0.183909	0.0357716	0.0321726	0.125401	0.0394237
128272	ARHGEF19	-0.313706	0.112198	-2.796	0.005174	0.112853	29.338	9.90631	0.128653	-3.4063	-0.943027	0.097994	-2.62171	-0.676573	-0.176398	-1.70893	-0.751303	-0.24874	0.0409093	-0.723409	-0.115973	-0.0376915	-0.307353	0.0486478	0.0695736	0.174279	0.0761374	0.0293823	0.0456565	0.0323463
65125	WNK1	-0.245876	0.0880281	-2.79315	0.00521967	0.113597	0	6.1007	0.412004	-1.32748	-1.06868	0.198195	-1.53861	-0.098173	-0.583907	-2.90156	-0.337003	-0.414029	0.0827668	-0.21531	-0.0177163	-0.239035	-0.695353	0.0644484	0.150096	0.174391	0.0195828	0.0325658	0.167586	0.0574312
56905	C15orf39	0.31777	0.113811	2.79208	0.00523698	0.113722	23.0965	9.10232	0.167905	-0.251022	1.01371	2.98901	1.73332	1.75494	0.169441	2.2729	-0.0598302	0.26151	1.38994	0.300015	0.3307	0.0600842	0.50162	0.0568089	0.0665503	0.216241	0.029959	0.0355094	0.125743	0.0487068
2811	GP1BA	-0.376136	0.134799	-2.79035	0.00526506	0.11408	38.4051	11.3646	0.0777416	-1.53861	0.137432	-1.69389	0.372731	-3.15108	-1.27466	-3.15975	-0.315524	0.0346659	-0.730209	0.11091	-0.68213	-0.295385	-0.858454	0.0420539	0.063625	0.185834	0.0885428	0.0468614	0.0537019	0.0738123
5149	PDE6H	0.255396	0.0916159	2.78768	0.00530866	0.11428	12.1198	7.96539	0.24065	-0.810631	-0.15989	1.18893	2.50408	0.229173	2.64753	2.39432	-0.236621	-0.0463497	0.504092	0.306072	0.0473893	0.452331	0.475831	0.085204	0.0840338	0.179767	0.0149399	0.0427594	0.0291897	0.0394948
79903	NAA60	-0.248387	0.0891095	-2.78744	0.00531266	0.11428	0	5.14403	0.525477	-0.499608	-0.467743	-0.834901	-2.69573	0.631466	-1.30306	-1.54426	-0.160896	-0.15537	-0.351178	-0.502986	0.141705	-0.268083	-0.28494	0.103712	0.110337	0.176923	0.0348146	0.0503582	0.0423262	0.0340462
8936	WASF1	-0.259579	0.0931409	-2.78694	0.00532076	0.11428	22.2865	9.00744	0.17316	-2.10644	-1.95667	-1.52601	-2.76288	-1.43763	0.342198	0.0786011	-0.348019	-0.373257	-0.653755	-0.504046	-0.31801	0.053672	0.0167465	0.0272966	0.03639	0.183534	0.0332825	0.0489315	0.0246003	0.045393
10654	PMVK	-0.340397	0.122272	-2.78393	0.00537043	0.115096	48.243	13.5247	0.0354198	-2.28189	-0.403165	-3.25844	-2.38982	-0.697887	0.116898	-2.7147	-0.494675	-0.110065	-1.55085	-0.374289	-0.12248	0.022737	-0.524019	0.0469949	0.0745302	0.226528	0.0245292	0.0308009	0.0378312	0.0372608
8078	USP5	-0.439671	0.158006	-2.78262	0.00539218	0.115311	60.2786	17.6228	0.00724744	-0.969527	-2.7046	-3.76026	-2.76303	-0.151816	-0.346248	-1.77639	-0.234319	-0.693987	-1.88603	-0.570124	-0.0235502	-0.106609	-0.388595	0.058411	0.0658413	0.251571	0.0425762	0.0240633	0.0948018	0.0478541
22954	TRIM32	-0.305117	0.109722	-2.78081	0.00542236	0.115704	16.109	8.34416	0.213958	-0.723804	-0.68633	-1.69465	-3.52257	-0.197941	-1.06538	-1.12115	-0.188634	-0.229476	-0.730558	-0.769472	-0.0350786	-0.200518	-0.303934	0.0679199	0.111791	0.185845	0.0477163	0.0314061	0.0354238	0.0734905
23403	FBXO46	-0.411973	0.148196	-2.77992	0.00543721	0.11577	58.8899	17.0274	0.00918289	-1.63695	-2.08661	-1.29624	-5.6345	-0.0699677	-0.608257	-1.36669	-0.371284	-0.59947	-0.551241	-0.980563	-0.014567	-0.127803	-0.286111	0.051445	0.0825377	0.180848	0.0302859	0.0433453	0.0441479	0.0438257
6809	STX3	0.335174	0.120636	2.77839	0.00546284	0.116065	26.1067	9.47312	0.148666	0.543649	1.36256	3.17799	0.723012	2.07113	-0.138572	2.11547	0.118376	0.423109	1.50161	0.148045	0.382011	-0.0504172	0.455725	0.047412	0.0964264	0.223261	0.0419274	0.0340202	0.132375	0.0464078
153443	SRFBP1	-0.33679	0.121248	-2.77768	0.00547477	0.116068	30.3799	10.0546	0.122373	0.211253	-1.00276	-2.47395	-3.2614	-0.576928	-0.77366	-2.0318	0.0592708	-0.304597	-1.1091	-0.661247	-0.111359	-0.156428	-0.48377	0.0787186	0.0922701	0.200984	0.0411075	0.0372571	0.0408818	0.0566915
4720	NDUFS2	-0.23683	0.0853247	-2.77563	0.00550943	0.116551	0	3.71706	0.714903	-0.679338	-0.0474673	-0.305758	-2.00214	0.168526	-1.41335	-2.1976	-0.212478	-0.0165375	-0.127761	-0.366262	0.0328447	-0.27507	-0.397535	0.0978267	0.121382	0.174597	0.0334654	0.0379837	0.037878	0.032723
114625	ERMAP	-0.306916	0.110731	-2.77172	0.00557613	0.117709	0	6.4989	0.369679	-0.565394	-0.338925	-1.85257	-2.37253	-0.0810017	-0.900929	-2.09	-0.142012	-0.0989691	-0.803877	-0.612805	-0.0188255	-0.251128	-0.666457	0.0630884	0.0852693	0.188291	0.0667147	0.0540138	0.0776979	0.101684
9990	SLC12A6	0.277226	0.100074	2.77022	0.00560187	0.117999	19.2743	8.67134	0.192923	1.2689	2.24074	2.71704	0.893108	1.39573	-0.335423	1.51642	0.272292	0.519628	1.23783	0.270852	0.211386	-0.0666838	0.270422	0.0460484	0.0537776	0.207551	0.0919718	0.0229375	0.0395234	0.0318015
1981	EIF4G1	-0.418984	0.151383	-2.76771	0.00564512	0.118624	68.1959	22.0097	0.00120597	0.220056	-2.60601	-3.87447	-1.93985	-1.76019	-0.0947677	-3.78096	0.0335093	-0.432822	-1.97046	-0.365441	-0.321683	-0.0274028	-0.743134	0.0231881	0.0275846	0.258649	0.0354894	0.0333992	0.0836123	0.0386304
389677	RBM12B	-0.253437	0.091589	-2.76711	0.00565565	0.118624	0	3.20316	0.78295	-0.26475	0.332315	0.178132	-1.69956	-1.29899	-1.55966	-1.90771	-0.0829649	0.115911	0.0743821	-0.306215	-0.230991	-0.386258	-0.471964	0.0982009	0.12166	0.174363	0.0324624	0.0316211	0.0613332	0.0612058
22913	RALY	-0.402113	0.145669	-2.76047	0.00577189	0.120083	61.065	17.9787	0.00628567	-1.22701	-2.60194	-2.37053	-5.2105	0.723761	-0.197668	-2.34462	-0.232021	-0.59626	-1.05612	-0.812428	0.161371	-0.0640953	-0.390071	0.0357569	0.0525141	0.19849	0.0243114	0.0497117	0.105143	0.0276786
23396	PIP5K1C	-0.23806	0.0862443	-2.7603	0.00577479	0.120083	0	4.71437	0.580934	-0.436212	0.165725	-1.80083	-2.26994	-1.62951	-0.0803512	-1.02885	-0.111315	0.046533	-0.779693	-0.497596	-0.241755	-0.0255259	-0.206109	0.0651202	0.0788399	0.187458	0.0480533	0.0220109	0.10092	0.0401322
27044	SND1	-0.563398	0.204155	-2.75965	0.00578625	0.120083	83.9606	43.6426	8.70198e-08	-1.16693	-2.29243	-4.23253	-8.29028	-0.437026	-0.697354	-1.9705	-0.207352	-0.529519	-2.26107	-1.11832	-0.077742	-0.220414	-0.27313	0.0315739	0.0533543	0.285382	0.0181968	0.0316444	0.0999013	0.0192125
6282	S100A11	0.316446	0.114831	2.75575	0.00585583	0.121271	13.8341	8.12386	0.229169	0.0824192	0.524449	2.95022	0.940949	2.27711	0.650173	1.71838	0.0172016	0.148135	1.36766	0.257082	0.463032	0.272572	0.33132	0.0435594	0.079783	0.214905	0.0746471	0.041348	0.175754	0.0371755
4661	MYT1	-0.294389	0.106961	-2.75231	0.00591767	0.122038	0	5.43471	0.489383	-0.906914	-1.52422	-1.44013	0.844382	-2.01134	-1.24642	-1.21581	-0.389706	-0.705925	-0.615172	0.244225	-0.462104	-0.288851	-0.257281	0.184646	0.214499	0.182469	0.0836569	0.0527848	0.0537055	0.0447799
26112	CCDC69	0.387524	0.14086	2.75112	0.00593914	0.122225	51.8007	14.523	0.0243092	0.941606	0.215179	1.21772	5.12204	2.87079	0.834986	0.414524	0.273664	0.0703237	0.516703	0.997581	0.487592	0.176016	0.0835853	0.0844692	0.106808	0.180046	0.0379324	0.0288476	0.0444372	0.0406593
134266	GRPEL2	-0.255644	0.092972	-2.74969	0.00596524	0.122376	0	6.94971	0.325523	0.597337	-1.82821	-1.5856	-2.36097	-1.40906	-1.44475	-0.0475066	0.125058	-0.422447	-0.680731	-0.433936	-0.270323	-0.360246	-0.0114913	0.0438315	0.0533942	0.184316	0.0337809	0.0368051	0.0621745	0.0585103
8527	DGKD	-0.310991	0.113115	-2.74935	0.00597139	0.122376	43.903	12.4784	0.0521091	-2.51023	-2.95346	-0.27783	-3.3352	-1.37933	-0.576634	0.599901	-0.455501	-0.589071	-0.11607	-0.723445	-0.225475	-0.111482	0.118457	0.032927	0.0397807	0.174535	0.047051	0.0267215	0.0373774	0.0389908
56931	DUS3L	-0.2296	0.083537	-2.74848	0.00598731	0.122447	0	4.54316	0.603589	-1.96875	-1.84249	-1.62848	-0.673673	-0.383547	-1.11373	-0.577284	-0.436487	-0.485887	-0.700253	-0.134548	-0.0646542	-0.263202	-0.115457	0.0491544	0.0695442	0.184902	0.0398891	0.0284155	0.0558494	0.0399999
55322	C5orf22	-0.430754	0.156802	-2.74711	0.00601225	0.122623	61.1979	18.0403	0.00613232	-0.518531	-0.272377	-1.86027	-2.41539	-0.981295	-1.16851	-5.68237	-0.142623	-0.0835744	-0.807487	-0.570939	-0.174554	-0.225789	-1.05976	0.0756537	0.094147	0.188417	0.0558735	0.0316418	0.0373372	0.0347822
8318	CDC45	-0.266438	0.0970113	-2.74647	0.00602409	0.122623	0	3.0768	0.799148	0.45984	-0.948508	-0.814808	-1.12443	-1.06736	-0.700484	-2.43938	0.153879	-0.351021	-0.342601	-0.286492	-0.240463	-0.149578	-0.466611	0.111981	0.136957	0.176794	0.0649175	0.0507545	0.045597	0.0365891
161253	REM2	0.434876	0.158379	2.74579	0.00603653	0.122623	54.8433	15.5016	0.0166946	0.982242	2.74521	3.03154	1.8368	0.495105	-0.502425	3.1407	0.24048	0.837577	1.41461	0.466017	0.103651	-0.121552	0.671207	0.0599405	0.093089	0.217745	0.0643693	0.0438283	0.0585307	0.0456729
163	AP2B1	-0.3326	0.121153	-2.74529	0.00604575	0.122623	27.6108	9.66995	0.139257	-0.729702	-1.31929	-2.2284	-1.31372	0.15945	-1.02143	-3.2654	-0.167684	-0.418487	-0.984861	-0.214314	0.0349446	-0.300474	-0.803455	0.0528067	0.100619	0.195328	0.0266134	0.0480294	0.0865366	0.060541
83707	TRPT1	0.193295	0.0704304	2.74449	0.00606058	0.122671	0	6.19969	0.401196	-0.232624	2.3746	-0.853033	1.57993	0.97783	0.456306	2.00592	-0.0378742	0.36358	-0.358926	0.222557	0.170837	0.115199	0.398926	0.0265081	0.0234433	0.177043	0.019843	0.0305236	0.0637362	0.0395512
5534	PPP3R1	-0.509231	0.185895	-2.73935	0.00615606	0.124167	71.0685	24.1951	0.000480819	-0.407812	-0.4947	-1.62833	-4.0317	-1.30798	-0.810711	-6.24991	-0.0871965	-0.1414	-0.700183	-0.725416	-0.232163	-0.334062	-1.2984	0.045717	0.0816987	0.1849	0.0323741	0.0315055	0.169794	0.0431586
22836	RHOBTB3	-0.280387	0.102363	-2.73915	0.00615975	0.124167	4.26183	7.31161	0.292989	-0.348452	-2.34013	-1.52295	-2.73127	-1.33543	0.0788609	0.0663814	-0.100057	-0.72643	-0.652374	-0.476698	-0.2396	0.022703	0.015163	0.0824529	0.0963623	0.183494	0.0304619	0.0321908	0.082879	0.0521768
607	BCL9	-0.250425	0.0914637	-2.73797	0.00618201	0.124361	0	6.34031	0.386167	-1.66277	-0.286816	-1.6778	-2.79723	-0.747645	-0.443188	-0.158989	-0.381903	-0.0713962	-0.722818	-0.596786	-0.159216	-0.0922916	-0.0359888	0.0527521	0.0619647	0.1856	0.0455176	0.0453508	0.0433659	0.0512387
217	ALDH2	0.259568	0.0948658	2.73616	0.00621611	0.124792	0	4.85023	0.563161	0.690978	1.85511	2.26975	1.23971	1.25655	0.0678463	0.381793	0.154565	0.474987	1.00542	0.244332	0.305403	0.0250605	0.0837538	0.0500371	0.065558	0.196218	0.0388438	0.059073	0.136435	0.0481231
55331	ACER3	-0.260259	0.0951469	-2.73534	0.00623153	0.124846	0	6.01239	0.421803	-0.266886	-1.07819	0.546435	-1.14376	-3.18068	-0.0688132	-0.750975	-0.0562602	-0.311343	0.228839	-0.322084	-0.566113	-0.0212932	-0.188089	0.0444375	0.0833856	0.175381	0.0792988	0.0316786	0.0957496	0.06273
415116	PIM3	0.319894	0.117118	2.73138	0.0063069	0.125835	32.0528	10.3021	0.112492	2.4116	1.13944	1.58107	2.96588	-0.356224	0.765971	1.28824	0.596335	0.327118	0.678672	0.761155	-0.0635301	0.143157	0.255977	0.0611463	0.0824187	0.184255	0.0658626	0.0318062	0.0349301	0.0394827
10158	PDZK1IP1	0.35029	0.128251	2.73129	0.00630874	0.125835	0	3.89963	0.690257	0.269243	1.03856	2.2134	0.587154	1.83173	0.165997	1.25769	0.100066	0.400602	0.977439	0.235611	0.49715	0.0493564	0.386098	0.138128	0.148787	0.195012	0.161022	0.0736632	0.0884067	0.0942422
6314	ATXN7	0.218703	0.0800892	2.73074	0.00631924	0.125835	0.353213	7.02481	0.318559	0.582596	-0.180125	1.85636	0.466932	0.791813	2.26585	2.4655	0.121126	-0.0400271	0.805652	0.0883362	0.114758	0.369983	0.475528	0.0432253	0.0493809	0.188353	0.0357906	0.0210047	0.0266625	0.0372001
57655	GRAMD1A	0.246926	0.0904951	2.72861	0.00636019	0.126394	0	2.48853	0.869749	-0.18328	1.39384	1.38867	0.928013	1.92947	0.349353	1.15019	-0.047535	0.34999	0.59221	0.216025	0.319007	0.113666	0.248632	0.0672664	0.0630496	0.181867	0.0541877	0.0273353	0.10586	0.0467274
1506	CTRL	0.344991	0.126538	2.72638	0.00640328	0.126994	36.1142	10.9571	0.0897129	0.472037	0.95583	1.62254	0.0841172	1.34988	0.838144	4.63758	0.122516	0.279336	0.697539	0.0257948	0.305288	0.149538	0.82207	0.0673645	0.085407	0.18482	0.0940362	0.0511485	0.0318321	0.0314222
64710	NUCKS1	-0.334143	0.122603	-2.7254	0.0064223	0.127115	33.6328	10.5474	0.103414	-0.311292	0.1961	-1.84894	-4.23381	-0.709357	-0.48212	-2.32829	-0.0852196	0.0703587	-0.802175	-0.696266	-0.117101	-0.152922	-0.468854	0.0749449	0.12873	0.188231	0.027045	0.0272516	0.100607	0.0405509
6238	RRBP1	-0.237706	0.0872572	-2.7242	0.00644573	0.127323	0	2.14254	0.906134	-1.767	-0.536491	-1.22508	-1.14208	-1.21637	0.312463	-1.33092	-0.359682	-0.141653	-0.519928	-0.236659	-0.234202	0.0950948	-0.259768	0.0414347	0.0697153	0.180119	0.0429389	0.0370724	0.0926223	0.038095
51099	ABHD5	0.315093	0.115799	2.72103	0.00650782	0.127661	15.3119	8.26562	0.219282	1.75637	1.30992	2.58546	2.10956	1.49245	0.144251	-0.419412	0.421821	0.407718	1.16738	0.487096	0.276836	0.0452184	-0.0987548	0.0576799	0.0968786	0.203868	0.0533146	0.0344069	0.0982641	0.0554414
10772	SRSF10	-0.212706	0.0781743	-2.72092	0.00651006	0.127661	1.06674	7.07548	0.313924	-0.330764	-2.49853	-0.78168	-2.35169	-1.96497	0.127134	-0.197987	-0.0630838	-0.711174	-0.32848	-0.345837	-0.260586	0.0244918	-0.0375692	0.0363746	0.0810181	0.176588	0.0216264	0.0175869	0.0371124	0.0360072
285368	PRRT3	-0.292591	0.107543	-2.72068	0.00651476	0.127661	18.6169	8.60129	0.197274	-0.513192	-0.556977	-2.09432	-3.45815	-1.11502	-1.18303	-0.0385828	-0.144661	-0.188374	-0.919136	-0.700605	-0.203238	-0.211446	-0.00842159	0.0794594	0.114385	0.192608	0.0410449	0.0332237	0.0319454	0.0476431
55281	TMEM140	0.434509	0.159756	2.71982	0.00653168	0.127738	55.9744	15.8999	0.0143017	-0.396281	2.37683	2.79144	2.67917	1.36242	-0.582152	3.83904	-0.0884661	0.648852	1.27852	0.695585	0.32725	-0.191577	0.644992	0.0498365	0.0745238	0.209777	0.0674059	0.0576948	0.108296	0.0282268
5863	RGL2	0.284991	0.104868	2.71762	0.00657543	0.128338	3.20608	7.23186	0.299936	0.589723	0.850756	2.14069	0.485882	1.84122	-0.736982	2.68686	0.137761	0.227966	0.941714	0.175573	0.342111	-0.208931	0.501344	0.0545706	0.0718012	0.193521	0.130572	0.0345243	0.0803698	0.0348163
51816	ADA2	0.243115	0.0895181	2.71582	0.00661119	0.128673	0	3.53109	0.739829	0.340569	0.385026	0.181658	1.08093	2.6112	-0.47252	1.54902	0.0761026	0.096983	0.0758554	0.344614	0.387406	-0.179193	0.337669	0.0499331	0.063447	0.174368	0.101641	0.0220116	0.143815	0.0475191
5869	RAB5B	-0.214959	0.0791769	-2.71492	0.00662918	0.128673	0	5.42294	0.490819	-1.34645	-2.48796	-1.21734	-0.470872	0.489208	-0.459282	-1.62388	-0.225908	-0.445846	-0.516534	-0.0951881	0.0919392	-0.184701	-0.305085	0.0281504	0.0321131	0.180043	0.0408657	0.0353195	0.161726	0.0352969
8567	MADD	-0.410988	0.151425	-2.71413	0.00664492	0.128673	73.9102	26.8304	0.000155795	-4.14426	-3.82941	-1.77406	-5.36337	0.264767	-1.53674	0.707506	-0.583616	-0.702479	-0.767245	-0.8059	0.0432582	-0.324361	0.144315	0.0198317	0.0336514	0.187039	0.0225781	0.0266936	0.044551	0.0416068
7439	BEST1	0.310516	0.114441	2.71334	0.00666095	0.12873	15.5419	8.28813	0.217745	0.804931	0.636208	2.59976	0.564578	1.38243	-0.291009	3.051	0.188415	0.200616	1.17495	0.13579	0.295155	-0.0882458	0.576042	0.0547917	0.0994337	0.204253	0.057848	0.0455839	0.0919547	0.0356471
79877	DCAKD	-0.30642	0.113319	-2.70405	0.00684991	0.132123	23.6794	9.17184	0.164142	-0.89646	-2.83604	-2.5094	0.875419	-1.19881	-1.22883	-1.4413	-0.193453	-0.55694	-1.1275	0.252207	-0.23559	-0.361911	-0.290803	0.0465684	0.0385649	0.201878	0.0830009	0.03862	0.0867394	0.0407089
9727	RAB11FIP3	-0.243919	0.090256	-2.70252	0.00688151	0.132214	0	6.93154	0.327225	-0.0686601	-3.12121	0.303815	-2.04829	-0.283974	-0.490176	-1.25752	-0.0148451	-0.627577	0.126947	-0.351654	-0.0578261	-0.137167	-0.264589	0.0467475	0.0404285	0.174593	0.0294746	0.0414659	0.0783057	0.0442706
51126	NAA20	-0.269218	0.0996339	-2.70207	0.00689099	0.132214	21.2444	8.88826	0.179961	0.179628	-1.47705	-0.142778	-3.08716	-0.849863	-0.355	-2.75706	0.0320628	-0.286906	-0.0596122	-0.581223	-0.147949	-0.105673	-0.589811	0.0318607	0.0377303	0.17432	0.0354459	0.0303058	0.0886082	0.0457648
89849	ATG16L2	0.265195	0.0981521	2.70188	0.00689494	0.132214	0	3.18786	0.784926	0.891878	1.1135	1.9654	1.28459	1.48754	-0.220234	0.823639	0.212329	0.319307	0.857186	0.354383	0.297526	-0.0780639	0.173089	0.056677	0.0822311	0.190216	0.0761052	0.0400046	0.125641	0.0441638
5257	PHKB	-0.221645	0.0820595	-2.70102	0.00691263	0.132295	6.19579	7.46235	0.280195	1.08514	-2.11562	-0.234099	-1.5235	-1.9726	-0.433061	-2.36949	0.241127	-0.547156	-0.0977767	-0.229768	-0.254393	-0.0998147	-0.399394	0.0493764	0.0668881	0.17445	0.0227455	0.0166316	0.053124	0.0284113
55796	MBNL3	-0.266411	0.0987085	-2.69897	0.00695552	0.132724	0	5.99763	0.423456	-1.56594	0.450472	-0.600301	-0.249592	-0.812732	-0.74692	-2.99764	-0.461569	0.146509	-0.251567	-0.0654757	-0.145729	-0.287261	-0.617308	0.0868804	0.105778	0.175618	0.0688174	0.032151	0.147912	0.0424077
3687	ITGAX	0.343693	0.127357	2.69866	0.00696203	0.132724	23.3207	9.12893	0.166456	0.975186	-0.280805	2.69365	1.51363	1.6272	0.0516548	2.69195	0.21399	-0.0809127	1.22516	0.549069	0.2715	0.0190881	0.648404	0.0481519	0.0830276	0.206873	0.131588	0.0278393	0.136553	0.0580173
4245	MGAT1	0.299431	0.111072	2.69584	0.00702108	0.133099	29.3228	9.90418	0.128746	0.401488	2.2718	-0.234417	0.298611	1.86128	0.205072	4.02453	0.07917	0.53473	-0.0979095	0.0710642	0.282844	0.0756096	0.71882	0.0388845	0.0554025	0.174451	0.0566355	0.0230925	0.135939	0.0319014
11025	LILRB3	0.409895	0.152051	2.69578	0.00702231	0.133099	53.2627	14.9773	0.0204337	1.31981	3.44677	2.83887	2.24262	2.45715	0.212916	-0.947968	0.241129	0.649441	1.30481	0.727646	0.46128	0.089324	-0.224954	0.0333792	0.0355021	0.211254	0.105276	0.0352424	0.176003	0.056312
54977	SLC25A38	-0.242231	0.0898893	-2.69477	0.00704376	0.133249	0	3.1981	0.783603	-2.16965	-0.998836	-0.583356	-0.783146	0.113186	-1.154	-1.56738	-0.499986	-0.277391	-0.244412	-0.137169	0.0265197	-0.337395	-0.321575	0.0531051	0.0771252	0.175541	0.0306778	0.0548972	0.0854804	0.0420937
2683	B4GALT1	0.245999	0.0913679	2.6924	0.007094	0.133942	3.47506	7.25201	0.298169	0.770715	1.66153	0.138222	2.14834	0.270252	-0.0261325	2.78623	0.174099	0.424361	0.0577089	0.486007	0.0369199	-0.00722531	0.522228	0.0510279	0.0652316	0.174315	0.0511774	0.0186631	0.0764455	0.0351307
241	ALOX5AP	0.475568	0.176813	2.68967	0.00715219	0.134541	60.5513	17.7445	0.00690332	4.50483	-0.383613	3.28001	2.10257	1.37361	0.78753	0.725293	0.894715	-0.0986481	1.56424	0.606227	0.27256	0.365681	0.164028	0.0394468	0.0661288	0.227435	0.083132	0.0393726	0.215611	0.0511456
6117	RPA1	-0.2845	0.105909	-2.68627	0.00722537	0.135641	7.51789	7.56903	0.271407	-1.14404	-0.602344	-3.21182	-0.891469	-1.00232	-0.630081	-1.46553	-0.250156	-0.157097	-1.52219	-0.195705	-0.187717	-0.220066	-0.327203	0.047812	0.0680213	0.224613	0.048194	0.0350744	0.121986	0.0498477
4638	MYLK	-0.225911	0.0841874	-2.68343	0.00728705	0.136538	0	3.73709	0.712204	-0.125317	0.273625	-1.45734	-0.523441	-1.99399	-1.17054	-1.76163	-0.0375428	0.0863927	-0.622876	-0.0973365	-0.394951	-0.211493	-0.324867	0.0897497	0.0996882	0.182677	0.0345793	0.0392319	0.0326452	0.0340082
10667	FARS2	-0.335941	0.125235	-2.68248	0.00730791	0.136669	34.4266	10.6751	0.0989535	-1.99471	-2.62285	-0.457968	-2.74606	0.846025	-0.241738	-2.23017	-0.438239	-0.603335	-0.191604	-0.737929	0.192543	-0.063512	-0.441546	0.0482685	0.0529138	0.175041	0.0722118	0.0517953	0.0690275	0.039199
688	KLF5	0.258236	0.09638	2.67935	0.00737651	0.136874	0	4.93717	0.551897	1.6257	1.43948	2.03343	0.259729	0.68858	0.286582	1.62558	0.44716	0.416014	0.889731	0.103232	0.165238	0.0486232	0.374863	0.0756565	0.083523	0.191452	0.157975	0.0575851	0.0287865	0.0531773
3386	ICAM4	-0.458557	0.17119	-2.67865	0.00739189	0.136874	59.5745	17.3158	0.00819005	-1.4003	-1.94742	-2.22592	0.458886	-1.43191	-0.676467	-4.74247	-0.375928	-0.526935	-0.983634	0.124186	-0.30747	-0.150422	-1.22592	0.0720717	0.0732139	0.195276	0.0732378	0.0461079	0.0494456	0.0668218
140775	SMCR8	0.204629	0.0763925	2.67865	0.00739201	0.136874	0	4.54111	0.603861	-0.118365	2.3838	0.502891	0.761146	1.1584	1.92987	0.348161	-0.0223278	0.535196	0.210498	0.1826	0.182436	0.319543	0.0717622	0.0355835	0.0504064	0.175206	0.0575526	0.0248029	0.0274159	0.0424845
1051	CEBPB	0.235216	0.0878135	2.67859	0.00739325	0.136874	0	5.27907	0.508551	2.78443	1.45026	1.12312	0.915203	0.322737	0.59607	-0.197898	0.488745	0.350882	0.475379	0.219282	0.056795	0.287497	-0.0436541	0.0308101	0.0585368	0.179155	0.0574077	0.0309687	0.232634	0.0486595
3054	HCFC1	-0.228893	0.0854658	-2.67818	0.00740236	0.136874	0	6.51452	0.368082	-1.26792	-1.62233	-2.7715	-0.845066	-0.627397	-0.216095	-1.05443	-0.228337	-0.31959	-1.26755	-0.213402	-0.0892132	-0.0771906	-0.236602	0.0324318	0.0388065	0.20917	0.0637702	0.0202196	0.127597	0.0503505
80746	TSEN2	-0.231948	0.0867168	-2.67478	0.0074779	0.138011	0	1.67573	0.94698	-1.70537	-0.766755	-1.49479	-0.914721	-0.842789	-1.11717	-0.551784	-0.34552	-0.192874	-0.639691	-0.224046	-0.158162	-0.24421	-0.119371	0.0410494	0.0632755	0.183138	0.0599927	0.0352183	0.0477848	0.0468016
4893	NRAS	-0.479488	0.179411	-2.67256	0.0075274	0.138153	73.4941	26.4092	0.00018676	-1.23451	-0.188912	-3.11789	-2.90273	-1.37737	-0.0514345	-5.65473	-0.235721	-0.0405276	-1.46552	-0.56303	-0.258345	-0.0130813	-1.20524	0.0364591	0.0460238	0.220932	0.0376228	0.0351801	0.0646833	0.0454278
57470	LRRC47	-0.399172	0.149393	-2.67195	0.0075412	0.138153	68.9973	22.5787	0.000950603	-2.4339	0.972677	-2.93358	-5.32419	-1.0483	-0.455437	-3.07299	-0.455103	0.217428	-1.35816	-0.728837	-0.165396	-0.109106	-0.613964	0.0349636	0.0499682	0.214343	0.0187393	0.024893	0.0573901	0.0399174
26994	RNF11	-0.44558	0.166788	-2.67154	0.00755048	0.138153	65.9333	20.5479	0.00221107	-0.64711	0.00277933	-1.31141	-6.23275	-1.42793	-0.614014	-3.63394	-0.156226	0.000718964	-0.557941	-0.990859	-0.236719	-0.22083	-0.832068	0.0582842	0.0669167	0.18101	0.0252734	0.027482	0.129348	0.0524279
604	BCL6	0.503944	0.18869	2.67075	0.00756812	0.138153	68.5259	22.2405	0.00109516	2.73349	2.12688	3.54478	4.3068	0.719465	0.260939	-0.42628	0.538461	0.583719	1.73559	0.990585	0.128264	0.110208	-0.0996319	0.0388038	0.0753219	0.239727	0.0529024	0.0317827	0.178379	0.054627
10048	RANBP9	-0.302188	0.11315	-2.67068	0.00756986	0.138153	22.8731	9.07595	0.169351	-1.04434	1.56884	-2.12469	-1.66441	-2.15778	-1.24672	-2.12175	-0.303558	0.535905	-0.933906	-0.425877	-0.323853	-0.235055	-0.478606	0.084488	0.116686	0.193203	0.0654708	0.0225259	0.0355471	0.0508823
8445	DYRK2	-0.21539	0.080773	-2.66661	0.00766209	0.139578	0	1.81065	0.936264	-0.69962	-0.931813	-1.15732	-1.33872	-0.466202	-1.41322	-1.48916	-0.150956	-0.24091	-0.490285	-0.215091	-0.0775988	-0.39248	-0.307426	0.0465559	0.0668426	0.179468	0.0258144	0.0277053	0.077129	0.0426185
81890	QTRT1	-0.333493	0.125106	-2.66568	0.00768319	0.139703	34.5566	10.6963	0.0982295	-0.970175	-1.61322	-2.17363	-2.06975	-0.22514	0.228914	-2.99091	-0.27352	-0.544614	-0.957847	-0.499782	-0.0388469	0.0481939	-0.598564	0.0794839	0.113969	0.194187	0.0583077	0.0297721	0.0443241	0.0400512
23272	FAM208A	-0.229358	0.0860635	-2.66498	0.00769928	0.139738	7.66298	7.58093	0.270441	-0.0908566	-0.415533	-0.705091	-2.78257	-0.838457	0.246816	-2.9794	-0.0228651	-0.132536	-0.295925	-0.360234	-0.109908	0.0574121	-0.604944	0.0633335	0.101731	0.176146	0.0167602	0.0171828	0.0541077	0.041226
25996	REXO2	-0.314126	0.117925	-2.66377	0.007727	0.13976	11.9964	7.95422	0.241476	-2.07707	-0.282407	-2.52366	-0.509383	-0.805871	-0.333664	-2.20396	-0.525563	-0.0773609	-1.13493	-0.095968	-0.168568	-0.144521	-0.637895	0.0640249	0.0750395	0.202244	0.0354947	0.0437542	0.187604	0.0837703
10011	SRA1	0.211598	0.079447	2.66338	0.00773591	0.13976	0	4.12813	0.659342	0.686513	0.578101	0.734798	-0.0699665	1.31945	0.994634	2.6723	0.125815	0.132676	0.308538	-0.0129911	0.274189	0.222841	0.473017	0.0335867	0.0526721	0.176312	0.0344757	0.0431831	0.0501956	0.0313317
3187	HNRNPH1	-0.325315	0.122162	-2.66297	0.00774533	0.13976	34.9531	10.7615	0.0960341	0.428163	0.19816	-0.0486353	-4.26517	-1.08362	-1.32741	-3.12361	0.141185	0.0729073	-0.020302	-0.649743	-0.183951	-0.342156	-0.627108	0.108732	0.135366	0.174251	0.0232066	0.0288171	0.0664416	0.0403061
7486	WRN	-0.350398	0.131607	-2.66245	0.00775735	0.13976	45.912	12.9419	0.0439685	0.242442	-1.04021	-1.31554	-4.3238	-0.662796	-0.568359	-2.87512	0.0582997	-0.25813	-0.559768	-0.813249	-0.138284	-0.127413	-0.630389	0.0578254	0.0615792	0.181054	0.0353766	0.0435296	0.0502555	0.0480733
6208	RPS14	-0.469686	0.176518	-2.66085	0.00779447	0.140017	73.0984	26.0208	0.000220665	-3.10982	-3.60052	-2.34734	-5.81349	0.0520414	0.311172	-0.500997	-0.60182	-0.711014	-1.04438	-1.00574	0.0101862	0.11948	-0.090061	0.037451	0.0389966	0.197954	0.0299292	0.0383116	0.147431	0.0323149
4863	NPAT	-0.310191	0.116587	-2.6606	0.00780008	0.140017	31.2765	10.1857	0.117045	-0.538149	-1.47295	-0.503292	-3.42874	-0.21892	-0.77383	-2.36428	-0.125934	-0.419692	-0.210667	-0.954184	-0.0337762	-0.174609	-0.459313	0.0547619	0.0811873	0.175207	0.0774453	0.023804	0.0509145	0.0377414
2268	FGR	0.303048	0.114053	2.65709	0.00788191	0.140674	20.6783	8.82482	0.183672	0.13622	0.934407	3.01681	1.49851	1.81319	0.367145	1.66543	0.024268	0.207502	1.40604	0.547829	0.303357	0.143012	0.362636	0.0317386	0.0493141	0.21722	0.133651	0.0279914	0.15173	0.0474124
284695	ZNF326	-0.217066	0.081709	-2.65657	0.00789389	0.140674	0	3.26051	0.775511	-1.5238	-1.00326	-0.982524	-0.0169903	-0.882349	-0.954054	-2.08206	-0.349159	-0.245306	-0.414501	-0.00341351	-0.15931	-0.161204	-0.491918	0.0525038	0.059784	0.177977	0.0403647	0.0325992	0.02855	0.0558209
5082	PDCL	-0.493744	0.186	-2.65453	0.00794181	0.141017	71.0629	24.1904	0.000481765	0.0247074	-0.931068	-3.16596	-4.96896	-1.32155	0.175966	-3.91994	0.00784027	-0.32067	-1.49434	-0.839076	-0.230275	0.0350817	-0.952499	0.100695	0.118618	0.222787	0.0285148	0.0303616	0.0397468	0.0590433
2068	ERCC2	-0.289523	0.109156	-2.65238	0.00799264	0.14145	28.8935	9.84439	0.13136	-0.299123	-0.481348	-1.90651	-4.14025	-1.56703	-0.268122	-0.631717	-0.0784189	-0.146758	-0.829258	-0.644151	-0.306971	-0.0497806	-0.129439	0.0687291	0.0929578	0.189192	0.0242059	0.0383741	0.0344712	0.041984
2593	GAMT	-0.466521	0.175894	-2.65228	0.00799492	0.14145	74.0248	26.9487	0.000148045	-2.45678	-2.55716	-1.65815	-6.06984	0.207209	-0.229523	-1.80405	-0.489981	-0.616635	-0.713814	-1.19307	0.0378687	-0.0435642	-0.380818	0.0397765	0.0581487	0.185319	0.0386345	0.0333999	0.0360253	0.0445591
27018	BEX3	-0.493976	0.186379	-2.65039	0.0080399	0.14199	71.6416	24.684	0.000390641	-1.69534	-1.51074	-0.728898	-7.22691	-1.45096	-1.20368	-1.01377	-0.417273	-0.362274	-0.306032	-1.37417	-0.291477	-0.359411	-0.212495	0.0605797	0.0575036	0.176278	0.0361557	0.0403549	0.0891578	0.0439358
6678	SPARC	-0.373805	0.14123	-2.64677	0.00812639	0.14326	30.824	10.1191	0.119725	-0.624671	-0.0677397	-1.29835	-3.62292	-0.827161	0.425278	-3.00045	-0.207792	-0.0251773	-0.552176	-0.760437	-0.172743	0.145359	-0.750291	0.11065	0.138144	0.180871	0.0440564	0.0436134	0.116826	0.0625296
8881	CDC16	-0.308992	0.116794	-2.64561	0.00815439	0.143497	41.0869	11.8819	0.0646557	-0.117969	0.221709	-2.29381	-3.95536	-1.23432	-0.597762	-2.41838	-0.0236431	0.051037	-1.01745	-0.573936	-0.198041	-0.203185	-0.520301	0.0401675	0.0529913	0.196747	0.0210549	0.0257429	0.115538	0.0462873
6431	SRSF6	-0.280492	0.106161	-2.64213	0.00823864	0.144463	24.5024	9.27182	0.158858	0.602377	-1.346	-1.17682	-3.62522	-1.12467	-0.436153	-1.65142	0.111698	-0.296648	-0.498796	-0.654302	-0.213231	-0.16977	-0.31423	0.0343839	0.0485725	0.179651	0.0325753	0.0359463	0.151511	0.0362062
55173	MRPS10	-0.187648	0.0710475	-2.64116	0.00826221	0.144603	0	1.88139	0.930278	-1.75163	-0.970574	-0.970714	-0.572007	-1.7904	-0.593236	-0.141266	-0.287983	-0.169934	-0.409414	-0.0944382	-0.257692	-0.171517	-0.0277323	0.0270302	0.0306553	0.177886	0.0272579	0.0207157	0.0835913	0.0385389
55164	SHQ1	-0.20356	0.0771172	-2.63961	0.0083001	0.144603	0	4.56098	0.601219	0.954042	-0.691337	-1.361	-1.22244	-1.29183	-1.5004	-1.69519	0.226858	-0.224505	-0.57991	-0.200792	-0.206712	-0.273888	-0.312943	0.0565422	0.105456	0.181553	0.0269797	0.0256048	0.033322	0.0340793
22990	PCNX1	0.371826	0.140875	2.63939	0.00830546	0.144603	46.2454	13.0221	0.0426856	2.35867	0.482852	2.87754	3.36209	1.13663	0.293987	0.0582568	0.496535	0.12161	1.32645	0.831904	0.205224	0.0967316	0.0131947	0.0443165	0.0634323	0.212492	0.0612247	0.0326001	0.108263	0.0512988
54838	WBP1L	0.214893	0.0814371	2.63876	0.00832092	0.144616	0	6.27159	0.393464	1.39698	-0.854078	1.08825	1.33675	0.883426	-0.375956	2.68131	0.276151	-0.318446	0.460224	0.237463	0.134458	-0.09997	0.467055	0.0390763	0.13902	0.178847	0.0315565	0.0231651	0.0707076	0.0303417
55814	BDP1	-0.374164	0.142021	-2.63456	0.00842462	0.145771	51.9812	14.5776	0.0238089	0.0238676	-1.1936	-1.01752	-5.05257	-1.1748	-0.968485	-1.57865	0.00684501	-0.400085	-0.429599	-1.04076	-0.175506	-0.212758	-0.342709	0.0822493	0.112353	0.178254	0.0424306	0.0223178	0.0482598	0.0471279
81831	NETO2	0.348207	0.132225	2.63344	0.00845248	0.145771	25.9325	9.45084	0.149765	2.25385	1.12646	2.30323	-0.703861	1.73963	0.199683	2.18123	0.718777	0.423229	1.02217	-0.232563	0.372483	0.0402599	0.48075	0.101704	0.141162	0.196956	0.109171	0.045846	0.0406501	0.0485776
129607	CMPK2	-0.271779	0.103235	-2.63263	0.00847274	0.145771	0	3.42586	0.753806	-0.882461	-0.489242	-1.51444	-1.61139	-2.06942	-0.398937	-0.0822487	-0.328092	-0.217309	-0.648536	-0.407667	-0.432108	-0.0841766	-0.0211981	0.138229	0.19729	0.183386	0.0640046	0.0436002	0.044522	0.0664256
10013	HDAC6	-0.30679	0.116538	-2.63252	0.00847528	0.145771	34.3297	10.6593	0.0994941	-0.174959	-2.66191	-2.71014	-1.84705	-0.251218	-0.0157324	-2.13333	-0.036275	-0.577338	-1.23408	-0.363619	-0.0526832	-0.00408464	-0.428717	0.0429874	0.0470408	0.20735	0.0387556	0.0439789	0.0674088	0.0403856
9609	RAB36	0.21975	0.0834763	2.63249	0.00847627	0.145771	0	2.32552	0.88746	0.212891	1.37978	1.58389	0.614442	1.1591	1.27392	1.20572	0.0595034	0.460032	0.679955	0.117294	0.237596	0.199325	0.245113	0.0781215	0.111162	0.184293	0.0364412	0.042018	0.0244816	0.0413279
25804	LSM4	-0.298869	0.113635	-2.63008	0.00853638	0.145984	37.7981	11.2537	0.0808457	-1.57018	-3.06044	-1.59993	-2.68891	0.506136	-0.221117	-1.05573	-0.301981	-0.675538	-0.687244	-0.510034	0.0818561	-0.0683762	-0.197744	0.0369881	0.0487226	0.18451	0.0359786	0.0261559	0.0956236	0.0350832
1950	EGF	-0.382123	0.14531	-2.62971	0.00854584	0.145984	44	12.5	0.0517	-0.838908	-0.779183	-1.53474	-0.502034	-1.7771	-0.122848	-4.63834	-0.219142	-0.218638	-0.657699	-0.225768	-0.460308	-0.0217428	-0.889544	0.0682373	0.0787361	0.183646	0.202237	0.0670925	0.0313252	0.0367799
8239	USP9X	-0.371069	0.141194	-2.62808	0.0085868	0.146035	50.7058	14.2005	0.0274754	-0.586952	-0.342765	-2.39425	-1.52034	-1.83104	0.0582684	-4.32708	-0.152007	-0.106099	-1.06819	-0.282233	-0.258752	0.0166137	-1.03568	0.0670687	0.0958141	0.199047	0.0344612	0.0199698	0.0812956	0.0572883
64949	MRPS26	-0.364086	0.138546	-2.62791	0.00859119	0.146035	57.0919	16.3139	0.0121645	-2.91413	-0.0515597	-2.4158	-3.95122	0.446315	-0.476121	-2.43548	-0.59495	-0.0133018	-1.07919	-0.601819	0.076394	-0.119863	-0.540827	0.0416813	0.0665581	0.199561	0.023199	0.0292978	0.0633774	0.0493115
3983	ABLIM1	-0.248799	0.0947029	-2.62715	0.00861026	0.146035	0	4.44535	0.61664	-1.66136	-1.99907	-1.41494	0.158438	-1.02138	-0.655495	-1.04444	-0.406897	-0.626929	-0.603916	0.0336449	-0.18849	-0.225017	-0.23869	0.0599851	0.0983512	0.182171	0.0450942	0.0340563	0.11784	0.0522282
2219	FCN1	0.255304	0.0972011	2.62656	0.00862537	0.146035	0	5.17945	0.521012	1.16307	1.45531	2.24474	0.937166	1.51339	0.425401	-0.468144	0.217335	0.303772	0.99297	0.495164	0.29568	0.183938	-0.125058	0.0349179	0.0435697	0.195677	0.279168	0.0381719	0.186959	0.0713617
9040	UBE2M	-0.306425	0.116672	-2.62638	0.00862978	0.146035	41.6686	12.0004	0.0619598	-3.04142	0.435491	-2.07944	-1.37728	-1.15092	0.280665	-3.19656	-0.519262	0.0893685	-0.911927	-0.25547	-0.205866	0.0853804	-0.639448	0.0291487	0.0421124	0.192321	0.034406	0.0319949	0.0925421	0.0400171
60559	SPCS3	0.277132	0.105535	2.62598	0.0086401	0.146035	24.3415	9.25209	0.159889	1.0701	1.02642	0.466343	3.22272	-0.365715	0.930271	2.27929	0.276079	0.272016	0.195124	0.651129	-0.0542395	0.207903	0.451655	0.0665609	0.0702331	0.17507	0.0408215	0.0219962	0.0499462	0.0392656
25873	RPL36	-0.303749	0.115706	-2.62518	0.00866041	0.146128	39.9627	11.6594	0.0700128	-1.64356	-1.68995	-2.25371	-3.85939	-1.11999	0.0933617	0.359973	-0.372981	-0.416022	-0.997429	-0.577051	-0.155363	0.0332715	0.0720461	0.0514993	0.0606015	0.19587	0.0223558	0.0192426	0.127001	0.0400572
23187	PHLDB1	-0.350405	0.13353	-2.62418	0.00868583	0.146148	43.0745	12.2968	0.0556663	-1.56974	-0.0407457	-0.0200806	-4.74918	-1.17757	-0.407116	-2.00226	-0.479047	-0.0136846	-0.00838215	-0.966178	-0.238374	-0.100044	-0.323729	0.093132	0.112798	0.174244	0.0413883	0.0409771	0.0603877	0.0261411
689	BTF3	-0.252553	0.0962605	-2.62364	0.00869959	0.146148	10.688	7.83769	0.250237	-1.89511	-0.422043	-2.4246	-1.68811	0.0708439	-0.316812	-1.9324	-0.356566	-0.100806	-1.0837	-0.358856	0.0105427	-0.142092	-0.348109	0.0354006	0.0570506	0.199773	0.0451894	0.0221461	0.201159	0.0324516
94121	SYTL4	-0.265778	0.101311	-2.62338	0.00870617	0.146148	0	5.778	0.448513	-0.997178	-0.770052	-0.0342868	0.980851	-2.42645	-1.12132	-1.72178	-0.279746	-0.240268	-0.0143123	0.274618	-0.499078	-0.28773	-0.416019	0.0787012	0.0973532	0.174247	0.0783884	0.0423053	0.0658432	0.058381
10478	SLC25A17	-0.456571	0.174317	-2.6192	0.00881353	0.147447	75.6844	28.788	6.67203e-05	-0.873055	-1.15989	-2.88374	-6.09654	-0.555787	0.0315566	-3.47837	-0.199969	-0.311374	-1.32994	-1.00947	-0.0877163	0.00582555	-0.634663	0.0524617	0.0720662	0.212694	0.027417	0.0249083	0.0340794	0.0332917
327	APEH	-0.235022	0.089775	-2.6179	0.00884719	0.147759	0	6.64888	0.354542	-1.33844	-0.338279	-2.16087	-1.58209	0.30004	-0.295846	-2.25713	-0.254537	-0.0697455	-0.951586	-0.297307	0.0662899	-0.0931204	-0.452191	0.0361662	0.0425092	0.193928	0.0353142	0.0488133	0.0990738	0.0401356
254042	METAP1D	-0.313196	0.119685	-2.61684	0.00887472	0.147773	36.1564	10.9643	0.089486	-1.8456	-0.463625	-1.31666	-3.61703	-1.04426	0.0563733	-1.38282	-0.457036	-0.131758	-0.560264	-1.01575	-0.19924	0.0100445	-0.238123	0.0613234	0.0807648	0.181066	0.0788617	0.0364031	0.0317473	0.0296533
49856	WRAP73	0.208133	0.0795449	2.61655	0.00888245	0.147773	0	5.60753	0.468557	0.786542	1.50376	-0.37803	2.3198	0.279183	-0.397016	1.95294	0.171699	0.327663	-0.158044	0.467023	0.0433128	-0.121156	0.338346	0.0476534	0.0474789	0.174785	0.0405301	0.0240687	0.093126	0.0300154
10614	HEXIM1	-0.431683	0.165067	-2.6152	0.00891746	0.147773	66.7774	21.07	0.00178223	-1.85929	0.987935	-2.50333	-3.66135	-0.740067	-0.832864	-4.37107	-0.452775	0.296245	-1.12434	-0.685813	-0.142423	-0.145591	-0.991712	0.0593021	0.0899175	0.201724	0.0350856	0.0370358	0.0305576	0.0514748
9961	MVP	0.280728	0.107347	2.61514	0.00891907	0.147773	22.0346	8.97834	0.1748	0.549846	0.801255	0.888135	4.09557	1.0522	0.39325	0.623862	0.111397	0.182364	0.373949	0.800863	0.194008	0.131321	0.128261	0.0410454	0.051801	0.177282	0.0382373	0.0339972	0.111515	0.0422682
5138	PDE2A	-0.253651	0.0970509	-2.61358	0.00895979	0.147916	0	3.47342	0.747503	-1.28835	-0.95772	-1.74438	0.199059	-0.422814	-1.4496	-1.53771	-0.365758	-0.28579	-0.753495	0.0529549	-0.0995859	-0.284308	-0.352593	0.0805973	0.0890462	0.186585	0.0707699	0.055475	0.0384664	0.0525771
56920	SEMA3G	-0.217087	0.0830635	-2.61351	0.00896186	0.147916	0	4.927	0.55321	-0.763673	0.624182	-0.970768	-0.429801	-0.5108	-1.3888	-2.73273	-0.179727	0.169781	-0.409437	-0.165854	-0.0877592	-0.247965	-0.456836	0.0553878	0.0739875	0.177887	0.148908	0.0295178	0.0318786	0.0279465
2934	GSN	0.223823	0.0856732	2.61252	0.00898781	0.147964	0	4.05645	0.669038	0.861485	0.592109	1.42601	2.43485	0.771921	-0.291323	1.0706	0.170906	0.124078	0.60886	0.448769	0.178436	-0.0729175	0.249173	0.0393566	0.0439123	0.182301	0.0339703	0.0534343	0.062649	0.0541683
56994	CHPT1	-0.446835	0.171059	-2.61216	0.00899717	0.147964	54.7257	15.4613	0.0169568	-0.727096	0.60552	-2.56409	-1.39068	-1.84217	-0.619066	-4.91638	-0.215631	0.228123	-1.15611	-0.332627	-0.307534	-0.264066	-1.05908	0.0879508	0.141932	0.203299	0.0572083	0.0278692	0.18195	0.046405
8941	CDK5R2	0.20014	0.0766618	2.61069	0.00903607	0.147964	0	2.97621	0.811826	-0.0480979	0.84992	0.197369	0.791669	1.19768	1.34281	2.27243	-0.0094732	0.184841	0.0824215	0.193428	0.188403	0.218875	0.476991	0.0387919	0.0472978	0.17439	0.059697	0.0247455	0.0265683	0.0440592
2958	GTF2A2	-0.270723	0.103704	-2.61054	0.00903999	0.147964	26.5222	9.52669	0.146052	-0.63781	-1.63237	-2.33437	-2.1651	0.0157066	-0.193619	-2.33308	-0.137575	-0.392571	-1.03783	-0.348778	0.00205362	-0.0648163	-0.511371	0.046526	0.0578365	0.197657	0.0259503	0.0170952	0.112066	0.0480412
23231	SEL1L3	0.25464	0.0975729	2.60974	0.009061	0.148062	0	5.15662	0.523888	1.86638	1.00571	1.0337	1.11641	-0.0359146	0.137766	2.26658	0.406299	0.254755	0.436592	0.428193	-0.00659737	0.0396988	0.600014	0.0473905	0.0641656	0.178386	0.147106	0.0337443	0.0830369	0.070078
2547	XRCC6	-0.428582	0.164316	-2.60827	0.00910003	0.148453	69.7373	23.1308	0.00075384	-3.05967	-0.7947	-1.45917	-5.85534	0.463934	-0.114235	-3.29754	-0.560604	-0.195286	-0.623698	-0.959063	0.080669	-0.0369414	-0.640621	0.0335709	0.0603858	0.182699	0.0268281	0.0302344	0.104576	0.0377418
84930	MASTL	0.286909	0.110049	2.60711	0.0091309	0.148611	8.08701	7.6159	0.267615	2.49745	0.23796	0.161735	2.49069	1.12124	0.0379036	1.38625	0.694493	0.0721849	0.0675312	0.675279	0.239478	0.00671398	0.380049	0.0773289	0.0920201	0.174342	0.0735066	0.0456174	0.0313761	0.0751616
1032	CDKN2D	-0.396353	0.152054	-2.60665	0.00914323	0.148611	48.8681	13.6901	0.0332963	-0.625361	-0.674925	-1.64148	0.0996715	-2.93944	-0.497638	-4.34287	-0.121371	-0.23397	-0.706186	0.0253588	-0.494369	-0.195972	-1.0852	0.0376677	0.120173	0.185084	0.0647316	0.0282861	0.155082	0.0624399
51499	TRIAP1	-0.304609	0.116916	-2.60538	0.00917733	0.148611	43.7907	12.4535	0.0525844	-0.981621	-0.0966856	-2.06572	-4.51252	-1.76897	0.0198438	-0.989679	-0.177545	-0.0221096	-0.905291	-0.716192	-0.303988	0.0045713	-0.234775	0.0327137	0.0522923	0.192059	0.0251896	0.0295308	0.0530675	0.056275
6612	SUMO3	-0.457128	0.175464	-2.60526	0.00918047	0.148611	74.7169	27.6865	0.000107635	-1.84549	-3.82303	-1.34182	-4.51055	1.22141	-0.243329	-4.02506	-0.2858	-0.799347	-0.571404	-0.978514	0.208242	-0.0866089	-0.686069	0.0239828	0.0437175	0.18134	0.0470625	0.0290679	0.126688	0.029053
6777	STAT5B	0.213657	0.0820156	2.60508	0.00918526	0.148611	0	6.77812	0.341855	0.560505	3.07185	0.974226	0.66416	1.45354	-0.28137	1.00914	0.0995525	0.654448	0.410926	0.0852419	0.272955	-0.10048	0.218372	0.0315461	0.0453888	0.177913	0.0164726	0.0352638	0.127527	0.0468263
11335	CBX3	-0.389306	0.14949	-2.60424	0.00920788	0.148732	65.1625	20.0933	0.00266545	-1.45679	-2.94955	-4.0446	-0.71029	-1.60676	0.575288	-2.45012	-0.288332	-0.679913	-2.10322	-0.164283	-0.195573	0.136126	-0.485349	0.0391732	0.0531369	0.270406	0.0534953	0.0148156	0.0559904	0.0392404
28978	TMEM14A	-0.239069	0.0919066	-2.60122	0.00928932	0.149665	0	6.32375	0.387917	-0.463428	-0.443238	-1.77326	-2.64286	-0.451345	0.144536	-1.65923	-0.13241	-0.162959	-0.766874	-0.494999	-0.0920685	0.0275108	-0.358066	0.0816346	0.13517	0.187027	0.03508	0.0416107	0.0362288	0.0465708
2739	GLO1	-0.231547	0.0890232	-2.60097	0.00929607	0.149665	0	6.20147	0.401004	0.555893	-1.19393	-1.79145	-1.95902	-1.19236	-0.157166	-1.72594	0.118375	-0.335096	-0.775329	-0.459678	-0.183478	-0.0499052	-0.369865	0.0453455	0.0787732	0.187311	0.0550591	0.0236785	0.100826	0.0459234
7036	TFR2	-0.277506	0.106767	-2.59917	0.00934483	0.150032	0	2.44366	0.874718	-1.06934	-0.87256	-1.39708	-0.593937	-0.436807	-1.09485	-1.89748	-0.395501	-0.341858	-0.595956	-0.136424	-0.103075	-0.252836	-0.531581	0.136794	0.153497	0.181963	0.0527598	0.0556834	0.0533299	0.0784845
10555	AGPAT2	0.271418	0.104674	2.59299	0.00951463	0.152188	23.7792	9.18385	0.1635	0.85978	0.166904	0.824507	2.68492	-0.191917	0.705209	3.36765	0.219	0.0479349	0.34674	0.462141	-0.031045	0.170183	0.622204	0.0648807	0.0824838	0.176856	0.0296269	0.0261673	0.0582369	0.0341358
129804	FBLN7	-0.241343	0.0930977	-2.59236	0.00953196	0.152217	0	2.52552	0.865601	-1.8178	0.0145342	-1.17315	-0.905055	-1.2124	-0.546927	-1.40598	-0.501755	0.00434592	-0.497196	-0.308614	-0.247833	-0.104113	-0.279126	0.0761886	0.0894089	0.179616	0.116273	0.0417853	0.0362368	0.0394136
57496	MKL2	-0.230465	0.0889343	-2.59141	0.00955835	0.152391	0	4.75594	0.575475	0.644583	-0.901776	-2.15316	-1.14109	-1.15463	-1.28681	-1.14692	0.18842	-0.250175	-0.947808	-0.257667	-0.23903	-0.257382	-0.214333	0.0854467	0.0769648	0.193772	0.0509891	0.0428565	0.0400061	0.034923
4635	MYL4	-0.293542	0.113358	-2.5895	0.00961141	0.152989	0	5.26894	0.509811	-1.33814	-0.905649	-1.47365	-0.0510056	-0.0401784	-0.258515	-2.66852	-0.467779	-0.312035	-0.630189	-0.0199598	-0.00833038	-0.107918	-0.593531	0.122203	0.11871	0.182876	0.153136	0.0429878	0.174268	0.0494705
79139	DERL1	-0.271563	0.105019	-2.58584	0.00971423	0.154376	28.4539	9.7839	0.134053	0.692898	-0.799773	-2.15128	-2.60222	-1.42148	-0.647709	-2.34688	0.12353	-0.178992	-0.946888	-0.430448	-0.21813	-0.217674	-0.532242	0.0317839	0.0500882	0.193734	0.0273623	0.023548	0.112941	0.0514323
83478	ARHGAP24	0.230732	0.0892589	2.58497	0.00973864	0.154514	0	4.95084	0.550134	1.777	1.31709	1.98648	1.38868	0.795596	-0.207876	0.435607	0.396384	0.344335	0.867233	0.284739	0.14512	-0.0431863	0.149156	0.0497574	0.0683485	0.190592	0.0420426	0.0332711	0.0431601	0.117245
8807	IL18RAP	0.326739	0.126443	2.58408	0.00976404	0.154661	0	6.79475	0.340247	1.92305	0.436036	2.27236	2.13119	0.72611	0.348567	-0.384021	0.508604	0.139371	1.00672	0.655824	0.171134	0.147589	-0.127848	0.0699482	0.102164	0.196275	0.0946953	0.0555478	0.179281	0.110835
1399	CRKL	-0.555812	0.21515	-2.58337	0.0097839	0.154661	81.6658	38.1799	1.03594e-06	-0.999451	-0.723703	-4.33411	-2.59194	-0.268508	-0.598405	-6.12823	-0.179055	-0.162024	-2.35205	-0.53148	-0.0403358	-0.226578	-1.16996	0.0320958	0.0501231	0.294507	0.042046	0.0225667	0.143366	0.0364478
23401	FRAT2	0.300192	0.116219	2.58298	0.00979501	0.154661	16.563	8.38956	0.210929	1.114	1.27066	3.01964	0.980494	2.13811	-0.192822	0.318507	0.219011	0.377379	1.40768	0.267874	0.409424	-0.0829288	0.0637375	0.0386514	0.0882055	0.21732	0.07464	0.036668	0.184968	0.0400452
54888	NSUN2	-0.273466	0.105983	-2.58027	0.00987224	0.155205	23.8525	9.19268	0.163028	-0.232638	0.375549	-1.41895	-3.75988	-1.90417	-0.578739	-1.03144	-0.048329	0.0848233	-0.605709	-0.653543	-0.308856	-0.188937	-0.235837	0.0431571	0.0510149	0.182218	0.0302134	0.0263088	0.106578	0.05228
10959	TMED2	0.212955	0.0825371	2.58011	0.00987694	0.155205	0	4.9047	0.556093	0.565195	0.876433	-0.285889	3.0194	0.119735	0.0724906	1.1207	0.131717	0.232028	-0.119443	0.466025	0.0223278	0.0216366	0.218025	0.0543108	0.0700879	0.174553	0.0238219	0.0347738	0.0890873	0.0378471
388228	SBK1	-0.310013	0.120181	-2.57956	0.00989262	0.155205	31.2917	10.188	0.116955	-0.775096	-3.22835	-1.96905	-2.21743	-0.268754	-0.778082	-0.185215	-0.14064	-0.652359	-0.858921	-0.807002	-0.0568646	-0.184967	-0.0424151	0.0329238	0.040833	0.19028	0.132449	0.0447687	0.0565115	0.0524433
4172	MCM3	-0.388401	0.150683	-2.57761	0.00994862	0.155835	65.5338	20.3098	0.00243874	-1.13367	-4.45184	-2.95512	-2.19264	0.738781	-0.740243	-1.65827	-0.192659	-0.922485	-1.37047	-0.348079	0.137052	-0.232724	-0.334338	0.0288806	0.0429378	0.215072	0.0252012	0.0344142	0.0988402	0.0406501
634	CEACAM1	0.354841	0.13777	2.5756	0.0100065	0.156262	0	6.81244	0.338542	2.04052	0.633703	2.45874	1.79666	0.115488	0.189198	0.499566	0.581335	0.236621	1.10125	0.734266	0.0293887	0.0737543	0.170796	0.0811659	0.139423	0.200607	0.167022	0.064757	0.151964	0.116888
10276	NET1	-0.413879	0.160695	-2.57557	0.0100076	0.156262	48.3774	13.5599	0.0349572	-1.27195	-0.961366	-3.82932	-1.1217	-0.615342	-0.30448	-2.39441	-0.359242	-0.334757	-1.93666	-0.285911	-0.125581	-0.0752147	-0.64715	0.0797684	0.12125	0.255778	0.0649693	0.0416502	0.0610224	0.073049
10921	RNPS1	-0.246538	0.0957436	-2.57499	0.0100244	0.156276	24.4238	9.26217	0.159362	-1.61047	-1.63469	-1.18999	0.314642	-1.24182	-0.186619	-3.24512	-0.313795	-0.44111	-0.504556	0.0482292	-0.155909	-0.05367	-0.60367	0.0379653	0.0728157	0.179777	0.0234956	0.0157625	0.0827086	0.0346048
119710	C11orf74	-0.45993	0.178876	-2.57122	0.0101341	0.157662	70.5283	23.7516	0.00058015	-0.395262	-0.878223	-3.13041	-5.90766	-1.28615	-0.432532	-1.59253	-0.0834742	-0.218273	-1.47299	-1.06081	-0.224107	-0.107376	-0.455475	0.0445999	0.0617717	0.22141	0.0322438	0.0303619	0.0616279	0.0817995
4850	CNOT4	-0.182594	0.0710252	-2.57084	0.0101454	0.157662	0	0.904509	0.988975	-1.34804	-0.602099	-0.853415	-1.16059	-1.62985	-0.691906	-0.351448	-0.242136	-0.141225	-0.35909	-0.217845	-0.210455	-0.145618	-0.0616706	0.0322634	0.0550162	0.177046	0.035232	0.0166732	0.0442934	0.0307918
8660	IRS2	0.333008	0.129606	2.56939	0.0101877	0.157821	26.6588	9.54443	0.145195	2.31731	1.1063	0.795815	3.57366	0.160105	0.224362	0.332727	0.557418	0.337557	0.334503	0.847012	0.030041	0.0900553	0.0828844	0.057862	0.0931005	0.176675	0.0561763	0.035206	0.161109	0.0620539
5096	PCCB	-0.339369	0.132126	-2.56852	0.0102134	0.157971	47.991	13.4592	0.0362963	-2.3742	-2.01371	-2.12521	-3.85601	0.0183242	0.201715	-0.297459	-0.443212	-0.442111	-0.934155	-0.775944	0.00370544	0.0568937	-0.0656061	0.0348491	0.0482024	0.193213	0.0404935	0.0408909	0.0795521	0.0486447
57864	SLC46A2	0.381144	0.148645	2.56413	0.0103436	0.159483	47.5945	13.3574	0.0376991	-0.554521	3.00197	2.95687	1.28903	1.92559	0.324965	1.39264	-0.122638	0.7542	1.37146	0.425175	0.408649	0.0791712	0.330099	0.0489118	0.063119	0.215132	0.108795	0.0450372	0.0593557	0.0561836
8767	RIPK2	0.220661	0.0861344	2.56182	0.0104125	0.160294	0	5.15112	0.524582	1.71931	0.475474	1.33285	2.47084	0.726313	0.341387	0.0795108	0.342556	0.141719	0.567427	0.585296	0.115133	0.121583	0.0152121	0.0396967	0.0888385	0.181242	0.0561127	0.0251276	0.126839	0.0366036
5168	ENPP2	-0.219441	0.0858867	-2.55501	0.0106185	0.162464	0	6.02666	0.420211	-0.52336	0.153342	-1.0056	-1.80496	-1.52244	0.558492	-2.32524	-0.132805	0.0465487	-0.424452	-0.501836	-0.315681	0.108781	-0.359367	0.0643912	0.09215	0.178159	0.0773013	0.0429947	0.0379377	0.0238859
2521	FUS	-0.425686	0.166636	-2.55459	0.0106313	0.162464	72.1879	25.1689	0.000317724	-0.835117	0.26088	-0.125183	-6.46148	-2.84132	-1.22031	-3.33145	-0.184461	0.0723736	-0.0522631	-1.2829	-0.441653	-0.236874	-0.589308	0.048788	0.0769625	0.174302	0.0394202	0.0241614	0.0376786	0.0312908
57149	LYRM1	0.307606	0.12042	2.55443	0.010636	0.162464	41.6341	11.9933	0.0621185	2.71995	2.78911	1.25853	0.388216	-0.63009	0.397791	2.71448	0.45993	0.588325	0.534625	0.0838164	-0.104723	0.130896	0.583715	0.0285931	0.0444941	0.180456	0.0466134	0.0276235	0.108279	0.0462409
9829	DNAJC6	-0.437041	0.171266	-2.55182	0.0107161	0.163282	69.707	23.1077	0.000761209	-0.45363	0.922697	-2.75027	-3.9411	-2.02967	-1.2393	-2.81405	-0.0958007	0.179735	-1.25592	-1.00349	-0.449461	-0.185572	-0.799304	0.0445999	0.0379445	0.208532	0.0648319	0.049038	0.0224219	0.0806791
23074	UHRF1BP1L	0.20814	0.0815721	2.55161	0.0107228	0.163282	0	5.61756	0.467363	0.182179	1.44502	1.87897	0.885035	2.28101	0.699911	0.0160442	0.0473624	0.485648	0.816278	0.156997	0.403078	0.123181	0.00319289	0.0675885	0.112952	0.188727	0.0314676	0.0312265	0.0309742	0.0396033
27089	UQCRQ	-0.270428	0.106031	-2.55047	0.0107577	0.16356	19.6146	8.70805	0.190675	-1.44052	-2.53116	-2.2484	-1.66807	-1.26404	0.0280248	0.523244	-0.308386	-0.654496	-0.994789	-0.298322	-0.194367	0.0102357	0.118406	0.0458299	0.0668613	0.195756	0.0319845	0.0236444	0.133397	0.051208
54870	QRICH1	-0.377381	0.148	-2.54987	0.0107764	0.163592	70.757	23.9374	0.000536295	-0.670221	-0.946883	-3.87684	-5.42447	-1.53569	-0.405349	-0.986945	-0.125719	-0.200947	-1.97225	-0.7604	-0.245984	-0.096665	-0.150172	0.0351857	0.0450371	0.258803	0.0196503	0.025657	0.0568698	0.0231521
25805	BAMBI	-0.430986	0.169059	-2.54932	0.0107932	0.163594	55.9559	15.8932	0.0143391	-0.611308	-0.484838	-1.16996	-5.55329	-1.45343	-0.139285	-1.93668	-0.195918	-0.170978	-0.495799	-1.20696	-0.337074	-0.0379508	-0.40251	0.102714	0.124362	0.179586	0.0472372	0.053785	0.0742388	0.0431953
9645	MICAL2	-0.282461	0.110842	-2.54831	0.0108245	0.163816	0	6.34449	0.385726	-1.02202	-0.974914	-2.78446	-0.0752578	-1.1945	-0.45709	-1.33157	-0.332643	-0.406549	-1.27467	-0.0192406	-0.216194	-0.140378	-0.386305	0.105934	0.173898	0.209564	0.0653632	0.0327579	0.0943176	0.0841655
3920	LAMP2	0.415108	0.162992	2.5468	0.0108715	0.164275	64.8474	19.9132	0.00286969	4.44928	3.16291	2.62507	0.86127	2.16543	-0.0357611	-0.776007	0.813812	0.806989	1.18839	0.161872	0.35452	-0.0136137	-0.177898	0.0334555	0.0650973	0.204944	0.0353234	0.0268036	0.144921	0.0525546
55251	PCMTD2	-0.489117	0.192214	-2.54465	0.0109387	0.164784	73.0878	26.0105	0.000221642	-0.725655	-0.769502	-3.27288	-4.06836	0.521562	-0.771391	-4.5361	-0.168051	-0.23094	-1.55981	-0.731404	0.0843081	-0.302141	-0.902918	0.0536315	0.0900697	0.227134	0.0323203	0.0261292	0.153416	0.0396216
26156	RSL1D1	-0.373041	0.146639	-2.54394	0.010961	0.164861	60.531	17.7355	0.00692846	-2.50991	-1.92237	-1.98612	-4.80257	0.656086	-0.137487	-1.08872	-0.454712	-0.437344	-0.867065	-0.802129	0.109419	-0.0460869	-0.254862	0.0328213	0.0517572	0.190586	0.0278959	0.0278142	0.112366	0.0547997
55833	UBAP2	-0.225088	0.0885157	-2.54291	0.0109932	0.164861	7.22312	7.54498	0.273369	0.309533	-1.15776	-2.34148	-2.71116	-0.863022	-1.02856	-0.368726	0.0870923	-0.371528	-1.04142	-0.398122	-0.1182	-0.230322	-0.0674872	0.0791673	0.102979	0.19782	0.0215636	0.0187583	0.0501431	0.0334993
84632	AFAP1L2	-0.381995	0.150251	-2.54237	0.0110103	0.164861	53.5192	15.06	0.0197953	-1.35632	-1.80799	-1.78084	-4.22625	-1.66686	0.208213	0.0142746	-0.292026	-0.436205	-0.770397	-1.10703	-0.387664	0.0446026	0.00344468	0.0463574	0.0582086	0.187145	0.0686139	0.0540895	0.0458884	0.0582329
81704	DOCK8	0.315897	0.124409	2.53919	0.0111109	0.165932	37.4583	11.1925	0.082605	2.12678	2.12472	2.46035	-0.601089	1.34418	-0.647919	2.57728	0.444131	0.487126	1.10208	-0.153886	0.199157	-0.253998	0.529888	0.0436091	0.0525631	0.200646	0.0655425	0.0219524	0.153681	0.0422713
1992	SERPINB1	0.341686	0.134574	2.53903	0.0111161	0.165932	37.2335	11.1524	0.0837778	1.83947	1.99156	2.49914	2.80757	0.205043	0.265584	-0.191522	0.393977	0.548278	1.12216	0.650051	0.0367831	0.112314	-0.0449509	0.0458729	0.0757901	0.201617	0.0536085	0.0321815	0.178839	0.0550858
29071	C1GALT1C1	0.300471	0.118496	2.5357	0.0112224	0.166719	48.4266	13.5729	0.0347887	4.4414	2.00681	-0.0606173	-0.0142541	1.85539	-0.00617071	1.88573	0.73447	0.49869	-0.0253041	-0.00245211	0.309884	-0.00126993	0.399755	0.0273469	0.0617515	0.174256	0.0295937	0.027895	0.0423534	0.0449397
55014	STX17	-0.330437	0.130326	-2.53546	0.01123	0.166719	60.4729	17.7094	0.00700106	-1.32031	-4.37122	-2.05858	0.836713	-1.61888	-0.373369	-2.73659	-0.252621	-0.876882	-0.901844	0.212384	-0.245252	-0.058772	-0.466591	0.036609	0.0402418	0.191923	0.0644303	0.0229506	0.0247779	0.0290706
57459	GATAD2B	-0.288496	0.113816	-2.53475	0.0112526	0.166719	36.9122	11.0957	0.0854647	-0.722735	-3.46707	-1.03406	-2.1478	0.198798	-0.683672	-1.30877	-0.177354	-0.80342	-0.436746	-0.428909	0.0264944	-0.214478	-0.231453	0.0602177	0.0536982	0.178389	0.0398789	0.0177618	0.0984173	0.031275
55783	CMTR2	-0.219855	0.0867371	-2.53472	0.0112536	0.166719	0	5.76564	0.449949	0.0188145	-0.698538	-0.772357	-3.07082	-0.957086	-0.166724	-0.855483	0.00443332	-0.201508	-0.324511	-0.647706	-0.168208	-0.041233	-0.167693	0.0555232	0.0832156	0.176532	0.0444883	0.0308879	0.0611633	0.0384246
23277	CLUH	-0.264036	0.104322	-2.53096	0.011375	0.168265	0.363758	7.02556	0.31849	-0.572519	-1.77875	-2.62462	0.0214965	-0.832829	-0.646288	-1.66775	-0.15909	-0.583177	-1.18815	0.00781305	-0.13057	-0.145643	-0.370206	0.0772158	0.107491	0.204931	0.132101	0.0245795	0.050784	0.049275
2664	GDI1	0.223094	0.0881792	2.53001	0.011406	0.16835	0	4.94586	0.550775	0.401473	0.493829	2.26969	1.08507	1.92278	-0.239293	0.926555	0.108485	0.138684	1.00539	0.229887	0.350383	-0.0739631	0.15826	0.0730177	0.0788683	0.196217	0.0448861	0.0332066	0.0955369	0.0291744
10077	TSPAN32	-0.246696	0.0975338	-2.52934	0.0114278	0.16835	0	6.93185	0.327196	-2.33353	-2.0472	-0.528701	1.03159	-0.502644	-1.5615	-0.942984	-0.469701	-0.692253	-0.221366	0.396551	-0.0880052	-0.346849	-0.176593	0.040515	0.114343	0.175308	0.14777	0.0306546	0.0493398	0.0350702
661	POLR3D	-0.327326	0.129419	-2.5292	0.0114321	0.16835	45.2415	12.7834	0.0466073	-1.05634	-2.0942	-2.34189	-3.12623	-1.89083	0.515385	-0.0715643	-0.248461	-0.62939	-1.04163	-0.632704	-0.333053	0.0949676	-0.0169425	0.0553231	0.0903235	0.197829	0.04096	0.0310256	0.0339537	0.056048
373156	GSTK1	-0.292081	0.115509	-2.52864	0.0114506	0.16837	43.1344	12.3097	0.0554052	-3.38832	-1.30468	-2.14374	-1.20818	0.807884	-0.354791	-2.32738	-0.56945	-0.258536	-0.943202	-0.176759	0.14676	-0.134246	-0.472649	0.028245	0.0392678	0.193582	0.021404	0.0330002	0.143172	0.0412425
5806	PTX3	0.304407	0.120452	2.5272	0.0114976	0.168809	18.5371	8.59287	0.197802	2.37697	0.834604	2.60784	0.272293	0.113198	0.555425	1.82686	0.540626	0.195702	1.17923	0.113612	0.0298684	0.0918515	0.564102	0.0517305	0.0549831	0.204473	0.17409	0.0696223	0.0273478	0.095347
201191	SAMD14	-0.232418	0.0920544	-2.52479	0.0115766	0.169503	0	3.83676	0.698756	-1.04123	-0.280484	0.325162	-2.0612	-2.06773	-0.478562	-0.435541	-0.344615	-0.0917179	0.135887	-0.516098	-0.369636	-0.102154	-0.0877936	0.109541	0.106928	0.174644	0.0626937	0.0319565	0.0455652	0.040632
79639	TMEM53	0.203873	0.0807512	2.52471	0.0115794	0.169503	0	5.56265	0.473918	1.81751	-0.334317	-0.119634	0.747543	0.181318	1.01139	2.62541	0.385303	-0.0866953	-0.0499457	0.222122	0.0316031	0.171797	0.467075	0.0449416	0.0672472	0.174297	0.0882897	0.0303792	0.0288528	0.0316504
81848	SPRY4	0.208984	0.0828242	2.52322	0.0116284	0.169712	0	3.22546	0.780063	0.965138	1.34343	-0.463337	2.16859	0.616843	1.16035	0.459825	0.202921	0.317114	-0.193861	0.512468	0.156429	0.183653	0.0899739	0.0442055	0.0557184	0.175059	0.0558441	0.0643108	0.0250506	0.0382866
60481	ELOVL5	0.28692	0.113754	2.52229	0.0116593	0.169712	22.5183	9.03439	0.171653	1.52623	0.695028	3.17858	0.228055	1.2467	-0.0385761	2.03078	0.343483	0.194562	1.50197	0.0468077	0.23779	-0.0143932	0.362707	0.0506494	0.078363	0.223284	0.0421267	0.0363798	0.139211	0.0318998
64115	VSIR	0.310008	0.122929	2.52185	0.0116738	0.169712	28.6178	9.80637	0.133047	1.66185	-0.100755	3.39256	1.25877	1.69372	0.366822	1.00826	0.300859	-0.0242936	1.63544	0.352072	0.324421	0.148167	0.218399	0.0327752	0.0581368	0.232387	0.0782291	0.0366891	0.163152	0.0469198
90780	PYGO2	-0.220683	0.0875232	-2.52143	0.011688	0.169712	0	0.834158	0.991126	-0.278929	-0.687076	-0.822613	-0.738722	-1.50088	-0.84843	-1.56429	-0.0845675	-0.223383	-0.345932	-0.144067	-0.233126	-0.198957	-0.362489	0.0919219	0.105704	0.176844	0.0380335	0.0241263	0.0549903	0.0536975
65108	MARCKSL1	-0.416248	0.165109	-2.52106	0.0117003	0.169712	60.4435	17.6962	0.00703799	-2.04999	-2.30664	-0.931893	-4.65435	-0.700355	-0.22381	-0.226405	-0.467996	-0.616988	-0.392719	-1.29254	-0.129542	-0.0777041	-0.0412659	0.0521171	0.0715475	0.177595	0.0771203	0.0342124	0.120539	0.033221
79763	ISOC2	-0.310007	0.122978	-2.52082	0.0117081	0.169712	37.7638	11.2475	0.0810226	-0.19455	0.0123714	-1.27294	-2.85943	-2.66745	0.899781	-3.14384	-0.0610845	0.00473	-0.540969	-0.484129	-0.507623	0.186959	-0.555798	0.0985828	0.146179	0.180604	0.0286657	0.0362151	0.0431738	0.0312545
1479	CSTF3	-0.423215	0.16792	-2.52033	0.0117245	0.169712	71.5773	24.6282	0.000400029	-1.11789	-1.85714	-0.720562	-7.09962	-1.71096	-0.764894	-0.900515	-0.223405	-0.439575	-0.302491	-1.20558	-0.303496	-0.17502	-0.194438	0.039938	0.0560241	0.176232	0.0288351	0.031465	0.0523565	0.046621
26993	AKAP8L	-0.227415	0.0902559	-2.51967	0.0117467	0.169712	0	1.64984	0.948928	-0.759321	-1.21726	-0.768031	-1.83448	-0.158193	-0.232639	-1.38056	-0.207413	-0.35051	-0.32267	-0.28682	-0.0330682	-0.0743237	-0.32505	0.0746138	0.0829154	0.176506	0.0244451	0.0436963	0.102068	0.0554359
80205	CHD9	-0.400529	0.159047	-2.5183	0.0117923	0.169712	70.003	23.3357	0.000691497	-0.574415	-3.33781	-1.06608	-5.60764	0.439992	-0.806014	-2.26553	-0.109541	-0.700196	-0.450608	-0.853022	0.0655003	-0.271177	-0.490089	0.0363664	0.0440064	0.178656	0.0231399	0.0221615	0.113193	0.046796
29108	PYCARD	0.286152	0.113641	2.51804	0.011801	0.169712	17.2851	8.46281	0.206119	-0.69847	1.35924	2.35947	0.988319	1.50161	0.238788	2.56869	-0.151598	0.367778	1.05052	0.23081	0.331276	0.0887647	0.465281	0.0471079	0.073211	0.198234	0.0545399	0.0486707	0.138184	0.0328102
162989	DEDD2	0.209898	0.0833589	2.518	0.0118022	0.169712	0	6.34509	0.385663	-0.111264	1.80775	0.445927	1.65983	2.62657	0.203171	-0.231695	-0.0209009	0.435639	0.186544	0.276036	0.452664	0.0699697	-0.0462333	0.0352875	0.0580735	0.174999	0.0276568	0.0297011	0.118604	0.0398177
5499	PPP1CA	-0.186172	0.07395	-2.51754	0.0118179	0.169712	0	5.72616	0.454554	-0.989199	-1.76973	-1.47841	-2.31406	-0.00227418	-0.327104	-0.553271	-0.199475	-0.399243	-0.632329	-0.388576	-0.000298118	-0.104926	-0.101389	0.0406638	0.0508931	0.182935	0.0281971	0.0171841	0.102896	0.033582
3385	ICAM3	0.302928	0.120481	2.51433	0.011926	0.170766	26.5247	9.52701	0.146036	1.59693	-1.11656	2.39332	0.729231	2.28987	0.274966	2.47984	0.33915	-0.293865	1.06771	0.195786	0.432204	0.114996	0.441346	0.0451035	0.0692683	0.199025	0.0720833	0.0356252	0.174908	0.0316747
201254	CENPX	-0.322549	0.128377	-2.51251	0.0119875	0.171335	45.1854	12.7703	0.046832	-1.44944	-1.75839	-1.19945	-4.36971	0.565908	-0.292403	-1.40141	-0.317426	-0.425305	-0.508696	-0.729235	0.101482	-0.0773572	-0.355026	0.0479608	0.0585021	0.179868	0.0278503	0.0321579	0.0699903	0.0641782
10327	AKR1A1	-0.367935	0.14648	-2.51185	0.0120102	0.171335	60.1289	17.5566	0.00744141	-3.28198	-2.49592	-1.48673	-4.74733	0.179717	0.0801304	-0.0703055	-0.534177	-0.453416	-0.636065	-0.955933	0.0418009	0.0248562	-0.0147318	0.026491	0.0330014	0.183038	0.0405467	0.0540997	0.0962222	0.043907
1870	E2F2	-0.276054	0.109911	-2.51162	0.012018	0.171335	0	3.0374	0.804138	-1.06367	-0.946083	-1.42924	0.284949	-0.855926	-0.356913	-2.08212	-0.320457	-0.29925	-0.610305	0.144792	-0.147576	-0.164218	-0.555553	0.0907658	0.100048	0.18234	0.258197	0.0297276	0.211698	0.0711937
340205	TREML1	-0.273802	0.109113	-2.50936	0.0120951	0.172185	0	5.79222	0.446864	-1.97772	-0.7445	-0.00845375	0.698762	-0.711933	-2.55811	-0.290389	-0.550713	-0.228534	-0.0035288	0.293422	-0.164678	-0.592729	-0.0846846	0.0775394	0.0942261	0.174243	0.17633	0.0535049	0.0536875	0.0850448
80714	PBX4	-0.318091	0.126819	-2.50822	0.0121341	0.172241	32.2478	10.3318	0.111358	-1.52693	-0.571784	0.131082	-3.93884	-0.662436	-0.207232	-1.79112	-0.443951	-0.185477	0.0547271	-0.902786	-0.135564	-0.0430813	-0.39701	0.0845346	0.105224	0.174308	0.0525331	0.0418792	0.0432182	0.049131
8940	TOP3B	-0.221696	0.0884487	-2.50649	0.0121936	0.172836	0	6.82004	0.337811	-2.27715	0.875461	0.314757	-1.77279	-2.21313	-0.383915	-0.629632	-0.523249	0.238511	0.131529	-0.314353	-0.362705	-0.0908345	-0.127315	0.0528002	0.0742235	0.174619	0.0314429	0.0268591	0.0559797	0.0408871
3597	IL13RA1	0.397642	0.158763	2.50463	0.0122581	0.1735	58.9397	17.0481	0.00910807	2.11351	2.79607	3.91847	1.85501	1.30827	-0.0411015	-0.501792	0.401399	0.62113	2.00396	0.357813	0.277087	-0.0166164	-0.115529	0.0360699	0.049348	0.261543	0.0372066	0.044858	0.16344	0.0530071
374655	ZNF710	0.195414	0.0780525	2.50362	0.0122931	0.173561	0	5.58858	0.470816	1.6248	0.730939	1.0398	1.20422	0.463004	-0.26754	2.42181	0.33162	0.175657	0.43923	0.261554	0.0786418	-0.0440201	0.490075	0.0416565	0.0577525	0.178436	0.0471748	0.0288494	0.0270723	0.0409492
5476	CTSA	-0.247212	0.0987471	-2.50349	0.0122977	0.173561	7.01199	7.52785	0.274773	-1.67598	-0.564228	-1.08284	-0.700888	0.506503	-1.23161	-2.96034	-0.37839	-0.133768	-0.457878	-0.11263	0.110176	-0.409158	-0.607462	0.0509729	0.0562075	0.1788	0.0258232	0.0473165	0.110365	0.0421069
79627	OGFRL1	0.337884	0.134996	2.50292	0.0123172	0.173588	39.9002	11.6473	0.0703158	2.64222	0.447518	3.43276	1.07368	1.1481	0.427525	0.595384	0.635894	0.150696	1.66144	0.261212	0.219171	0.105053	0.121924	0.0579203	0.113391	0.234251	0.0591882	0.0364423	0.0603803	0.0419357
114932	MRFAP1L1	-0.542399	0.216813	-2.50169	0.0123603	0.173946	76.0491	29.2265	5.51159e-05	-1.57002	-0.833603	-1.833	-8.30194	-1.27668	-0.472655	-1.60569	-0.470657	-0.308551	-0.794709	-1.34646	-0.225241	-0.139514	-0.429557	0.0898665	0.137005	0.187972	0.0263042	0.0311265	0.0871254	0.0715676
10962	MLLT11	-0.372418	0.148915	-2.50087	0.0123888	0.174097	58.9823	17.0658	0.00904449	-0.886305	-1.66142	-2.54385	-4.12943	-2.13027	-0.536927	0.705893	-0.186062	-0.385911	-1.14549	-0.903856	-0.424467	-0.122094	0.14534	0.0440705	0.0539527	0.202767	0.0479092	0.0397027	0.0517079	0.042393
57142	RTN4	0.188437	0.0754278	2.49824	0.0124811	0.174895	0	5.50557	0.480784	1.73071	0.453402	1.85079	-0.113327	1.88885	-0.217687	1.22166	0.311471	0.087128	0.80304	-0.017961	0.294503	-0.0823574	0.246477	0.0323884	0.0369274	0.188261	0.0251186	0.02431	0.143134	0.0407052
5971	RELB	0.230461	0.0923438	2.49569	0.0125713	0.175909	0	5.90232	0.434221	-0.0569232	-0.257413	0.339617	1.30944	1.28553	0.198549	2.92221	-0.0132169	-0.0699065	0.141942	0.43739	0.261829	0.0515528	0.520373	0.0539115	0.0737522	0.17468	0.111576	0.0414834	0.0674169	0.0317107
5636	PRPSAP2	-0.413801	0.166006	-2.49269	0.012678	0.17714	70.3643	23.6202	0.000613279	-2.5164	1.21953	-1.98112	-5.73614	-1.28977	-0.721026	-2.4588	-0.472402	0.292347	-0.864677	-0.959275	-0.194259	-0.208892	-0.591263	0.0352424	0.0574667	0.190496	0.027967	0.022685	0.0839346	0.0578252
31	ACACA	-0.221511	0.0888815	-2.4922	0.0126953	0.17714	11.9246	7.94774	0.241957	-0.0334685	-1.21902	-1.7474	-2.71454	0.261512	-0.717987	-1.89105	-0.00636537	-0.236879	-0.754891	-0.51714	0.0478184	-0.145619	-0.33774	0.0361722	0.0377599	0.186631	0.0362932	0.0334353	0.0411342	0.0318976
1635	DCTD	-0.210323	0.0844227	-2.49131	0.0127272	0.177333	0	3.11737	0.793978	-1.55417	-0.676235	-0.587369	-2.30181	-0.787427	-0.23078	-0.366929	-0.345698	-0.190995	-0.246106	-0.479744	-0.123699	-0.0607415	-0.0750775	0.0494761	0.0797716	0.175559	0.0434391	0.024678	0.0692748	0.0418655
22818	COPZ1	-0.570327	0.228974	-2.4908	0.0127456	0.177339	85.7964	49.2831	6.54371e-09	-2.16188	-1.96641	-2.87765	-9.97701	0.882718	-0.374562	-3.70708	-0.383276	-0.492626	-1.32652	-1.23811	0.164232	-0.119879	-0.739488	0.0314311	0.0627604	0.212496	0.0153998	0.0346157	0.102432	0.0397923
140890	SREK1	-0.191638	0.0769768	-2.48955	0.0127904	0.177496	0	2.37985	0.881664	0.187637	-0.640103	0.10771	-1.61803	-1.69922	-0.780336	-1.41665	0.0389589	-0.150354	0.0449662	-0.322917	-0.261873	-0.159226	-0.25661	0.0431097	0.0551732	0.174286	0.0398299	0.0237512	0.0416357	0.0328111
116092	DNTTIP1	0.357069	0.143512	2.48808	0.0128435	0.177496	52.1386	14.6256	0.0233776	0.432445	1.92937	2.6909	0.0405605	1.22561	0.128883	4.12933	0.0937481	0.54948	1.22368	0.00858466	0.212688	0.0436924	0.765143	0.0469963	0.0811095	0.206794	0.044796	0.0301151	0.114927	0.0343342
5509	PPP1R3D	0.260394	0.104668	2.48782	0.0128531	0.177496	16.7735	8.41078	0.209526	1.91866	1.4718	2.81653	0.491908	0.811528	0.30923	1.03533	0.459421	0.470805	1.29239	0.0756781	0.141462	0.0828972	0.23364	0.0573359	0.102325	0.210553	0.0236687	0.0303859	0.0718646	0.0509253
375033	PEAR1	-0.235308	0.0945994	-2.48741	0.0128675	0.177496	0	5.23617	0.513899	-0.488297	0.52854	-0.287667	-2.17062	-2.31153	-0.537367	-0.692333	-0.134502	0.162779	-0.120187	-0.483508	-0.523215	-0.107422	-0.165046	0.0758739	0.0948508	0.174556	0.0496182	0.0512341	0.0399616	0.0568305
79590	MRPL24	-0.350961	0.141104	-2.48725	0.0128736	0.177496	57.4896	16.4666	0.0114572	-2.56071	-1.62008	-1.07681	-5.50952	-0.252334	-0.345686	-0.0964815	-0.502805	-0.383038	-0.455259	-0.863463	-0.048676	-0.0929602	-0.0217852	0.0385546	0.0558995	0.178748	0.0245618	0.0372116	0.0723155	0.0509841
25840	METTL7A	-0.396772	0.159524	-2.48723	0.0128743	0.177496	45.196	12.7728	0.0467891	-0.506128	0.854286	-1.81425	-0.786299	-1.95646	-1.37958	-4.13029	-0.132446	0.325446	-0.785952	-0.210616	-0.378027	-0.462239	-1.07989	0.0684789	0.145128	0.187671	0.0717478	0.0373339	0.112264	0.0683601
84717	HDGFL2	-0.322259	0.129597	-2.48662	0.0128964	0.177496	55.5727	15.7561	0.0151249	-3.3938	-3.19655	-1.67086	-1.73242	-1.69474	-0.350438	1.20539	-0.604664	-0.764052	-0.719635	-0.290094	-0.273703	-0.0848395	0.241467	0.0317435	0.0571323	0.185501	0.0280396	0.0260829	0.0586103	0.0401292
9	NAT1	0.209643	0.0843318	2.48593	0.0129214	0.177496	0	1.47208	0.961328	0.61804	0.512377	-0.554218	0.826699	1.35265	1.75687	1.04908	0.152631	0.145918	-0.23212	0.208602	0.239558	0.28575	0.23006	0.060989	0.0811038	0.175414	0.063671	0.0313653	0.0264542	0.0480912
2624	GATA2	-0.240807	0.0969018	-2.48506	0.0129528	0.177496	0	3.0997	0.796234	-0.0830939	-1.36155	-0.382423	-0.29067	-2.47948	-0.216754	-0.994474	-0.0245014	-0.462319	-0.159887	-0.0953297	-0.439109	-0.0516163	-0.213065	0.0869444	0.115296	0.174798	0.107562	0.0313634	0.0567074	0.0459026
1235	CCR6	0.259343	0.104376	2.48471	0.0129656	0.177496	19.6266	8.70935	0.190596	0.674335	3.662	-0.0955893	1.82502	-0.0311	-0.0869324	1.44812	0.114793	0.658598	-0.0399052	0.39505	-0.00659057	-0.0343887	0.306262	0.028979	0.0323448	0.174277	0.0468564	0.0449081	0.156483	0.0447279
3554	IL1R1	0.382872	0.154127	2.48414	0.0129865	0.177496	51.3042	14.375	0.0257168	1.06179	0.921635	1.32333	4.88233	0.96442	1.12879	-0.0179595	0.34765	0.338512	0.563212	1.09056	0.179495	0.225881	-0.00455136	0.107203	0.134906	0.181138	0.0498934	0.0346397	0.0400437	0.0642237
1806	DPYD	0.301473	0.121366	2.484	0.0129914	0.177496	17.3555	8.47002	0.20565	1.35088	0.823355	2.98665	1.09862	2.1359	-0.00417545	0.0895566	0.368207	0.280906	1.38858	0.311962	0.376186	-0.00130535	0.0186899	0.0742933	0.116399	0.216159	0.0806317	0.0310202	0.0977352	0.0435529
203259	FAM219A	0.210847	0.0849926	2.48077	0.0131099	0.178618	0	2.86203	0.825953	-0.024447	0.905515	1.22653	1.82252	1.68864	0.719443	0.0250348	-0.00663801	0.250472	0.520565	0.326503	0.297675	0.159602	0.00526738	0.0737269	0.0765117	0.180133	0.0320944	0.0310747	0.0492136	0.044269
342357	ZKSCAN2	-0.283178	0.114257	-2.47843	0.0131963	0.179546	35.2156	10.8051	0.0945908	-0.896589	-0.740482	-1.20396	-3.73669	-1.28505	-1.66333	0.586074	-0.210032	-0.19233	-0.510674	-0.800451	-0.243116	-0.308701	0.10937	0.0548761	0.0674627	0.179912	0.0458876	0.0357922	0.0344445	0.034825
4832	NME3	-0.272055	0.109852	-2.47655	0.0132658	0.179982	36.2952	10.9882	0.0887426	-3.26063	-0.807911	-2.05352	-2.84487	-0.125578	-0.0993327	-0.051362	-0.593693	-0.184158	-0.899404	-0.438041	-0.0212528	-0.0298248	-0.0104303	0.0331528	0.0519582	0.191828	0.0237085	0.0286422	0.0901507	0.041239
4835	NQO2	0.275184	0.111119	2.47649	0.0132681	0.179982	0	2.38642	0.880957	0.146433	1.07147	1.88143	1.0638	1.05382	0.51375	1.14193	0.0454358	0.360603	0.817432	0.29183	0.241641	0.153146	0.31776	0.0962753	0.113265	0.188768	0.0752563	0.0525779	0.0888604	0.0774312
79792	GSDMD	0.192747	0.0778437	2.47608	0.0132832	0.179982	0	1.52849	0.95758	0.550091	1.09313	0.715002	1.83504	1.30836	-0.0812456	0.751617	0.128444	0.236224	0.300131	0.352917	0.193683	-0.0257004	0.123677	0.0545201	0.0466987	0.176201	0.0369874	0.0219144	0.100064	0.0270759
1843	DUSP1	0.297123	0.120219	2.47153	0.0134537	0.181792	0.219178	7.01538	0.319428	2.33263	0.637511	2.12402	-0.9935	1.09601	0.23823	1.45004	0.500847	0.179988	0.933577	-0.351073	0.220735	0.130672	0.4516	0.046102	0.0797102	0.19319	0.12487	0.0405614	0.300863	0.0969946
115123	2019-03-03	-0.275324	0.11143	-2.47082	0.0134804	0.181903	0	4.49204	0.610401	-1.40096	-1.09849	-1.98544	-0.0631955	-0.238248	-0.827987	-1.65509	-0.446387	-0.409299	-0.86674	-0.0190903	-0.0520567	-0.226061	-0.460513	0.101524	0.138833	0.190574	0.0912545	0.0477412	0.0745425	0.0774179
54433	GAR1	-0.463313	0.187625	-2.46936	0.0135355	0.182396	76.2103	29.4245	5.05547e-05	-2.1229	-2.37707	-1.84044	-7.32006	-1.42295	-0.31889	0.29772	-0.451521	-0.724538	-0.79819	-1.10847	-0.238565	-0.0796748	0.0636178	0.0452374	0.0929051	0.188093	0.0229308	0.0281082	0.0624255	0.0456606
64921	CASD1	-0.264796	0.107269	-2.46853	0.0135668	0.182568	11.9474	7.94979	0.241805	0.262705	-0.706736	0.763369	-2.28361	-1.26274	-0.582178	-2.99625	0.0862071	-0.307168	0.320686	-0.49968	-0.235972	-0.104598	-0.612364	0.107683	0.188903	0.176478	0.0478784	0.0349214	0.0322802	0.0417699
64180	DPEP3	0.343667	0.139283	2.46739	0.0136102	0.182651	36.6586	11.0512	0.0868063	-0.0106351	2.97608	1.26133	2.43961	1.49204	-0.394199	1.22287	-0.00257091	0.885617	0.535858	0.7228	0.366977	-0.0848949	0.310419	0.0584377	0.0885532	0.180485	0.0877797	0.0604948	0.0463802	0.0644372
28969	BZW2	-0.306826	0.124427	-2.46592	0.0136663	0.182933	48.8638	13.6889	0.0333109	-1.17465	-1.94707	-3.71711	0.28173	-1.63314	-0.990841	-1.33634	-0.216307	-0.370733	-1.85501	0.0500744	-0.280166	-0.304864	-0.267242	0.0339094	0.0362545	0.249048	0.0315912	0.0294296	0.0946685	0.0399921
51714	SELENOT	0.198877	0.0806522	2.46586	0.0136684	0.182933	0	4.83661	0.564933	-0.594206	1.77852	1.54326	1.21675	1.66495	0.50057	0.718434	-0.144677	0.495399	0.661546	0.242429	0.262375	0.107757	0.128012	0.0592824	0.0775881	0.183756	0.039698	0.0248339	0.0463408	0.0317488
56945	MRPS22	-0.198994	0.0807611	-2.46398	0.0137403	0.183645	8.31554	7.63488	0.266091	-1.50726	-0.878045	-0.308487	-3.61611	0.146	-0.297355	-0.434264	-0.235578	-0.178173	-0.128903	-0.505734	0.0218749	-0.0900479	-0.0787021	0.0244283	0.0411764	0.174604	0.0195597	0.0224484	0.0917057	0.0328447
22898	DENND3	0.427074	0.173368	2.4634	0.0137628	0.183697	68.5407	22.251	0.00109036	1.13935	2.42409	3.43105	4.7013	0.957955	-0.211064	0.0162966	0.217918	0.633226	1.66033	0.88617	0.177317	-0.0695901	0.0033667	0.0365825	0.0682371	0.23417	0.0355302	0.0342619	0.108709	0.0426789
11092	SPACA9	-0.340253	0.138217	-2.46174	0.0138265	0.184298	50.4226	14.1193	0.0283312	-2.19354	0.356783	-2.60983	-2.69946	-0.226886	-0.322431	-2.28283	-0.600794	0.120992	-1.18029	-0.632195	-0.037613	-0.0521512	-0.501224	0.0750173	0.115001	0.204527	0.0548463	0.0274828	0.026161	0.0482076
10533	ATG7	0.381969	0.155237	2.46055	0.0138725	0.18466	63.2064	19.025	0.00412154	1.59841	2.99185	3.10782	-1.15582	1.4552	0.562344	2.7882	0.330907	0.679818	1.45952	-0.204702	0.273573	0.163482	0.572904	0.0428586	0.0516306	0.220551	0.0313663	0.0353426	0.0845153	0.0422197
11123	RCAN3	-0.220917	0.0898299	-2.45928	0.0139216	0.184994	0	3.36394	0.761975	-0.468967	-0.51299	-2.03846	-1.77974	-0.526856	-1.06679	-0.43642	-0.134738	-0.16518	-0.892152	-0.348749	-0.117739	-0.180048	-0.109892	0.082546	0.10368	0.191545	0.0383984	0.0499407	0.028485	0.0634043
84687	PPP1R9B	-0.210171	0.0855021	-2.45808	0.0139683	0.184994	0	2.36869	0.882865	-0.844251	-0.589776	0.405838	-2.1312	-1.34054	-0.380923	-0.837489	-0.227113	-0.16685	0.16971	-0.419956	-0.227062	-0.0827614	-0.174771	0.0723672	0.0800343	0.174869	0.0388294	0.02869	0.0472044	0.0435494
57106	NAT14	-0.464708	0.189093	-2.45757	0.0139882	0.184994	74.2159	27.1486	0.000135816	-1.39708	0.355589	-1.59995	-7.63909	-1.48973	-1.2831	-1.89273	-0.377352	0.125315	-0.687252	-1.25268	-0.282052	-0.265366	-0.380502	0.0729549	0.124197	0.18451	0.0268906	0.0358463	0.0427734	0.0404142
1730	DIAPH2	0.310341	0.126285	2.45746	0.0139924	0.184994	39.5752	11.5846	0.071903	1.35221	0.227354	1.04298	4.0778	1.14275	-0.487989	1.75312	0.302435	0.0587048	0.440605	0.872652	0.214894	-0.116153	0.405445	0.0500235	0.0666718	0.178463	0.0457963	0.0353627	0.0566552	0.0534862
51233	DRICH1	0.370975	0.150987	2.457	0.0140103	0.184994	54.9916	15.5527	0.0163675	1.0984	0.777888	1.46685	4.23092	0.622917	-0.367542	2.48621	0.271128	0.224788	0.627139	1.02322	0.156129	-0.0627622	0.532734	0.0609295	0.0835049	0.182792	0.0584878	0.0628215	0.0291598	0.0459141
10856	RUVBL2	-0.244181	0.099382	-2.457	0.0140104	0.184994	20.2878	8.7816	0.186239	-1.42436	-1.74287	-2.25096	-2.76373	0.141702	-0.243202	-0.15185	-0.255349	-0.442037	-0.996061	-0.458872	0.0321213	-0.0562369	-0.0272112	0.032139	0.0643261	0.195811	0.0275671	0.0513851	0.0534697	0.0321118
404672	GTF2H5	-0.295046	0.120145	-2.45574	0.0140593	0.185301	39.1478	11.5033	0.074013	-2.4162	-1.26235	-2.83105	-2.63627	-0.00501039	-0.361465	-0.043837	-0.510994	-0.329371	-1.30046	-0.42305	-0.000846913	-0.105274	-0.00979037	0.0447266	0.0680794	0.211007	0.0257516	0.0285717	0.084823	0.0498787
23082	PPRC1	-0.390894	0.159199	-2.45538	0.0140737	0.185301	66.1256	20.6646	0.00210728	-2.13783	-3.09694	-3.5726	-2.62444	-0.827583	-0.583866	0.987237	-0.416766	-0.694824	-1.75441	-0.532677	-0.133829	-0.159886	0.206654	0.0380046	0.0503366	0.241155	0.0411961	0.0261503	0.0749888	0.0438173
2357	FPR1	0.333548	0.135872	2.45486	0.0140938	0.185301	33.1921	10.4778	0.10592	2.34083	0.517163	3.22486	0.0609761	2.35543	0.333615	0.241236	0.459993	0.138059	1.53017	0.0207293	0.443258	0.172207	0.0497556	0.0386155	0.0712652	0.225143	0.115571	0.0354139	0.266448	0.0425402
27346	TMEM97	-0.404168	0.164666	-2.45447	0.0141091	0.185301	66.617	20.9687	0.0018585	-0.0247635	-2.407	-2.16792	-4.93246	-2.37648	-0.090501	-0.0666388	-0.00565727	-0.550316	-0.955042	-1.1308	-0.390952	-0.0242808	-0.0129939	0.0521902	0.0522725	0.194071	0.0525589	0.0270631	0.0719813	0.0380211
79718	TBL1XR1	-0.408339	0.166419	-2.45367	0.0141405	0.185467	66.2591	20.7464	0.00203734	-0.206428	-0.0862355	-3.1394	-1.70672	-0.933786	-0.963443	-4.89696	-0.0607452	-0.0304331	-1.47837	-0.251954	-0.15173	-0.221074	-1.0818	0.0865938	0.124543	0.221755	0.0217932	0.0264027	0.0526529	0.0488021
8801	SUCLG2	0.212228	0.0865126	2.45315	0.0141612	0.185491	0	6.18115	0.403207	0.480898	1.55742	-0.856365	2.32503	1.76643	-0.471625	0.62496	0.123871	0.473865	-0.360351	0.429183	0.298611	-0.129953	0.114169	0.0663494	0.0925755	0.177065	0.0340743	0.0285773	0.0759245	0.0333724
2014	EMP3	-0.401258	0.163615	-2.45245	0.0141887	0.185546	65.7759	20.4534	0.00229882	-3.58323	-4.15108	-0.480727	-3.08264	0.559509	-0.215517	-0.898795	-0.747071	-0.943813	-0.201173	-0.614352	0.0936153	-0.0833572	-0.178085	0.0434684	0.0516952	0.175122	0.0397182	0.0279949	0.149598	0.0392584
5265	SERPINA1	0.299309	0.122152	2.4503	0.0142738	0.186222	16.4188	8.37509	0.211891	1.51889	0.15798	3.18564	0.756415	1.82656	0.351271	0.479292	0.349158	0.0490902	1.50625	0.199051	0.36115	0.149219	0.104103	0.0528435	0.0965569	0.223564	0.0692481	0.039094	0.180453	0.0471769
9351	SLC9A3R2	-0.236526	0.0965709	-2.44924	0.0143156	0.18652	16.586	8.39188	0.210776	0.364219	-0.522848	-0.000934875	-3.21545	-1.41279	-0.711318	-2.01946	0.0749072	-0.120603	-0.000390239	-0.759724	-0.292275	-0.135081	-0.317482	0.0422982	0.0532061	0.174242	0.0558248	0.0427987	0.0360628	0.0247154
84259	DCUN1D5	-0.353733	0.144507	-2.44786	0.0143709	0.186736	60.3151	17.639	0.0072007	0.982516	-1.56918	-3.4592	-3.97271	-1.51921	-0.677626	-1.42409	0.233779	-0.36906	-1.67871	-0.609983	-0.256226	-0.143536	-0.345837	0.0566149	0.0553154	0.235505	0.0235756	0.0284451	0.0448683	0.058975
56941	HMCES	-0.233084	0.0952268	-2.44767	0.0143784	0.186736	2.11662	7.15137	0.307076	-2.57536	-1.6554	-0.768629	-2.02714	0.0607465	-0.0746377	-0.437345	-0.491325	-0.313299	-0.322924	-0.750618	0.0103142	-0.0177467	-0.106593	0.0363968	0.0358189	0.176509	0.13711	0.0288293	0.0565354	0.0594028
83700	JAM3	-0.224452	0.0917458	-2.44645	0.0144271	0.186736	0	4.80936	0.568487	0.0784008	0.657398	-1.73852	-1.50704	-0.948341	-1.17973	-1.66475	0.0212155	0.197079	-0.750786	-0.271254	-0.212482	-0.374588	-0.31488	0.0732262	0.0898723	0.186496	0.0323967	0.0502014	0.100819	0.0357758
597	BCL2A1	0.36274	0.148323	2.44562	0.0144604	0.186921	31.0919	10.1585	0.118136	0.964884	2.11074	1.63007	2.10545	1.44934	1.84838	-1.43088	0.303671	0.811075	0.700978	0.689313	0.273639	0.485746	-0.445229	0.0990503	0.147657	0.184924	0.107187	0.0356463	0.0690612	0.0968187
58484	NLRC4	0.317128	0.129728	2.44455	0.0145031	0.187039	21.2089	8.88425	0.180193	2.08555	1.49458	2.74746	1.62662	0.623311	0.111491	-0.392762	0.502047	0.455144	1.25438	0.424787	0.123329	0.0352311	-0.123068	0.0579492	0.0927382	0.208449	0.0681979	0.0391488	0.0998558	0.0981813
728	C5AR1	0.331326	0.135542	2.44444	0.0145076	0.187039	31.3742	10.2002	0.116469	1.18662	0.235398	3.35121	1.18305	2.69961	0.340779	0.11442	0.272634	0.0718145	1.60901	0.358207	0.428475	0.161074	0.0258665	0.052788	0.0930717	0.230523	0.0916771	0.0251913	0.223411	0.0511055
10867	TSPAN9	-0.231315	0.0946985	-2.44265	0.0145799	0.18726	0	4.33829	0.630998	-0.94823	-1.53372	-2.18945	-1.23667	-0.415411	-0.254296	-0.702243	-0.243365	-0.445794	-0.965624	-0.280939	-0.0816626	-0.0887245	-0.138033	0.06587	0.0844846	0.194513	0.051608	0.0386447	0.121733	0.0386359
219927	MRPL21	-0.210979	0.0863822	-2.44239	0.0145904	0.18726	0	5.72922	0.454196	-0.954046	-1.32899	-2.43201	-1.67684	-0.215462	-0.104943	-0.483897	-0.187665	-0.313521	-1.0875	-0.323857	-0.0427204	-0.0304401	-0.105423	0.0386924	0.0556533	0.199952	0.0373013	0.0393124	0.0841374	0.0474641
11183	MAP4K5	-0.290654	0.119017	-2.44213	0.0146008	0.18726	28.1268	9.73937	0.136066	-0.192111	0.0103392	-1.7714	-1.25356	-0.905974	-0.511589	-3.7678	-0.0482374	0.0035247	-0.76601	-0.20724	-0.165618	-0.158535	-0.825055	0.0630468	0.116217	0.186998	0.0273308	0.0334183	0.0960296	0.0479503
8795	TNFRSF10B	0.337649	0.138496	2.43796	0.0147702	0.189186	50.9057	14.2583	0.0268806	-0.115407	3.33056	2.29937	1.8312	-0.220294	0.543898	2.29979	-0.0240746	0.725159	1.02023	0.450062	-0.0363395	0.171274	0.476537	0.0435165	0.0474058	0.19687	0.0604048	0.0272116	0.0991621	0.0429355
55210	ATAD3A	-0.223719	0.0917828	-2.43748	0.0147901	0.189194	0	3.5026	0.743624	-0.169216	-0.602946	-0.0998376	0.653748	-1.88629	-0.992692	-2.01763	-0.0549345	-0.190614	-0.0416791	0.236338	-0.301969	-0.185572	-0.473105	0.105392	0.0999431	0.17428	0.130691	0.0256275	0.0349458	0.0549836
8760	CDS2	0.199335	0.0818444	2.43554	0.0148697	0.189965	0	5.85705	0.439392	1.87916	0.868275	1.21983	-0.303765	1.4436	-0.340796	1.9296	0.376448	0.220146	0.517628	-0.0507921	0.261418	-0.0903648	0.404333	0.0401312	0.0642844	0.180067	0.0279587	0.0327929	0.0703088	0.043908
57190	SELENON	-0.208849	0.0858035	-2.43404	0.0149313	0.190259	0	5.55465	0.474877	-1.7324	-0.644845	-2.24647	-0.20008	-1.53802	0.204044	-0.753898	-0.410393	-0.163443	-0.993829	-0.0455826	-0.263	0.0591825	-0.133311	0.0561179	0.0642424	0.195714	0.0519031	0.0292408	0.0841276	0.0312685
23013	SPEN	0.219712	0.0902914	2.43337	0.0149592	0.190366	6.77372	7.50861	0.276357	0.307419	1.78568	1.38538	2.58404	0.356707	-0.453854	1.52519	0.0567137	0.37503	0.590745	0.591034	0.0488829	-0.162715	0.287202	0.0340342	0.0441087	0.181829	0.0523151	0.0187799	0.128536	0.0354588
10409	BASP1	0.368117	0.151349	2.43224	0.0150059	0.190609	56.9891	16.2749	0.0123519	2.70833	1.49866	3.65337	-0.195749	2.74814	0.647678	-0.0565719	0.552391	0.389096	1.81004	-0.0395351	0.39621	0.306293	-0.0120969	0.0415997	0.0674072	0.245465	0.0407913	0.0207861	0.223644	0.0457242
60492	CCDC90B	-0.365833	0.150427	-2.43197	0.015017	0.190609	66.422	20.847	0.0019544	0.257781	-0.831022	-2.30663	-5.47416	-1.74523	-0.188389	-1.96337	0.0484718	-0.188441	-1.02387	-0.912264	-0.232736	-0.0520762	-0.462872	0.035357	0.0514195	0.197032	0.027772	0.0177837	0.0764131	0.0555799
3433	IFIT2	0.385368	0.15857	2.43026	0.0150878	0.190946	36.6839	11.0556	0.0866719	0.916754	0.866634	2.88652	-0.190014	2.20403	-0.417128	2.70886	0.278946	0.332721	1.33151	-0.0499863	0.483584	-0.15435	0.73174	0.092584	0.147397	0.212784	0.0692041	0.0481402	0.136922	0.0729694
57458	TMCC3	0.28118	0.115728	2.42966	0.015113	0.190946	24.0788	9.22009	0.161573	1.20522	0.386224	3.1782	0.779451	2.22254	0.847943	0.182277	0.381069	0.143612	1.50174	0.166317	0.385914	0.160639	0.0388441	0.0999709	0.138261	0.223269	0.0455301	0.0301497	0.0358894	0.0454137
54541	DDIT4	0.351554	0.144696	2.4296	0.0151155	0.190946	21.227	8.88629	0.180075	1.39057	-0.278933	0.141607	3.17116	0.310191	0.683076	2.2978	0.408292	-0.0941649	0.0591232	0.971417	0.07097	0.308674	0.624386	0.0862092	0.113967	0.174318	0.0938369	0.0523468	0.204204	0.073838
3669	ISG20	0.31979	0.13163	2.42946	0.0151211	0.190946	43.4655	12.3818	0.0539732	0.36401	-0.617819	1.83335	3.27039	1.58011	0.235389	2.73578	0.0742915	-0.130773	0.794873	0.758291	0.321328	0.0840854	0.534469	0.0416536	0.0448034	0.187978	0.0537616	0.0413544	0.127605	0.0381664
64919	BCL11B	-0.230935	0.0951136	-2.42799	0.0151829	0.191479	0	4.13594	0.658286	-1.1464	-0.84718	-1.52955	-1.93564	0.174225	-0.950671	-0.989336	-0.218866	-0.188668	-0.655352	-0.592902	0.0361733	-0.290185	-0.275407	0.0364491	0.0495958	0.183579	0.093825	0.0431078	0.0931731	0.0774927
54517	PUS7	-0.211652	0.0872311	-2.42633	0.0152522	0.191968	0	5.49213	0.482409	0.0115113	-1.42859	-1.76838	-0.469448	-1.99141	0.160042	-1.41398	0.00282006	-0.364087	-0.764611	-0.0947481	-0.39989	0.0338578	-0.299295	0.0600157	0.0649524	0.186952	0.0407348	0.0403237	0.044756	0.0448033
4643	MYO1E	0.200418	0.0826081	2.42613	0.0152606	0.191968	0	3.42802	0.75352	-0.146365	1.06664	-0.588702	1.62861	1.80467	1.12604	0.794516	-0.0366679	0.297423	-0.246669	0.337066	0.380812	0.189315	0.143007	0.0627619	0.0777524	0.175565	0.0428346	0.0445272	0.0282658	0.0323972
54964	C1orf56	0.220387	0.0909124	2.42416	0.0153437	0.192521	0.434779	7.03057	0.31803	-0.0738617	1.90039	0.795801	1.87189	0.170759	0.0241366	2.51447	-0.0253489	0.669681	0.334497	0.280354	0.0276868	0.00491944	0.525467	0.117782	0.124179	0.176675	0.0224313	0.0262893	0.0415411	0.0436715
4616	GADD45B	0.218309	0.0900908	2.42321	0.0153838	0.192778	0	3.15484	0.789177	0.217629	1.18536	1.09839	1.65546	1.63742	0.957958	-0.168912	0.0504341	0.338809	0.464627	0.420846	0.257844	0.298693	-0.037151	0.0537053	0.0816984	0.178935	0.0646263	0.0247967	0.0972202	0.0483751
171389	NLRP6	0.30111	0.124343	2.42161	0.015452	0.193385	16.3356	8.36676	0.212446	0.627323	0.542099	2.9872	1.36915	-0.0179596	1.03461	1.74972	0.199154	0.200444	1.3889	0.390625	-0.00364805	0.222231	0.43771	0.100785	0.136719	0.216178	0.0813992	0.0412601	0.0461378	0.0625801
10666	CD226	-0.229207	0.0947243	-2.41973	0.0155321	0.193785	0	5.75187	0.451551	-0.350027	-2.04947	-0.473064	1.17581	-1.67579	-0.843106	-1.46924	-0.0928371	-0.573961	-0.19795	0.382972	-0.315021	-0.185858	-0.324741	0.0703463	0.0784299	0.175094	0.106087	0.0353377	0.0485958	0.0488525
141	ADPRH	0.265692	0.109811	2.41953	0.0155406	0.193785	23.4521	9.1446	0.165608	0.599974	-0.149274	0.383783	4.08744	0.413388	0.951207	1.33127	0.190352	-0.0467136	0.160457	0.746343	0.0783261	0.186952	0.256805	0.100659	0.0979303	0.174802	0.0333406	0.0359002	0.0386288	0.0372116
81553	FAM49A	0.311979	0.128991	2.41862	0.0155796	0.193996	47.0717	13.2254	0.0395925	2.00411	1.89613	2.47791	-0.575573	3.35913	-0.271486	1.08204	0.472627	0.515538	1.11115	-0.121359	0.522599	-0.0611188	0.215971	0.0556153	0.0739243	0.201083	0.0444572	0.0242038	0.0506821	0.0398383
79630	C1orf54	-0.236468	0.0978418	-2.41684	0.0156559	0.194453	0	5.218	0.516173	-1.34419	0.233637	-1.10908	-1.93108	-2.04967	0.184815	0.0570644	-0.31601	0.0658959	-0.469272	-0.459968	-0.423974	0.0579223	0.0138271	0.0552689	0.0795486	0.17903	0.0567358	0.0427868	0.0982235	0.0587126
30834	ZNRD1	-0.309267	0.128013	-2.4159	0.0156965	0.194509	57.1245	16.3263	0.0121056	-0.688218	-3.47616	-2.14201	-3.85515	0.046547	-0.848199	0.0995409	-0.133638	-0.707707	-0.942357	-0.555506	0.00771013	-0.212685	0.0192183	0.0377059	0.0414484	0.193548	0.0207631	0.0274373	0.062875	0.0372758
23582	CCNDBP1	-0.263173	0.108939	-2.4158	0.0157008	0.194509	0	6.76851	0.342786	-1.27328	-0.0397499	-0.670479	-0.918933	-0.122552	-0.149511	-3.25691	-0.390584	-0.0172242	-0.281251	-0.219461	-0.0218547	-0.0551571	-0.694292	0.0940982	0.187761	0.175962	0.0570358	0.0318015	0.136099	0.0454437
6275	S100A4	0.21248	0.0879702	2.41536	0.0157197	0.194509	0	4.59792	0.596315	0.855329	-0.438663	1.85413	0.0233979	1.4431	0.314955	1.97175	0.195905	-0.1325	0.804607	0.00643244	0.202549	0.140076	0.395628	0.0524593	0.0912368	0.188316	0.0755782	0.0197001	0.197801	0.0402597
7132	TNFRSF1A	0.282512	0.117021	2.4142	0.0157698	0.194884	29.7595	9.96577	0.126101	0.501068	0.558805	3.24949	2.20565	1.94914	0.281145	0.216252	0.11236	0.139075	1.54533	0.403868	0.330228	0.114278	0.0445777	0.050284	0.0619405	0.226156	0.0335278	0.0287041	0.165221	0.0424929
27339	PRPF19	-0.2286	0.0947282	-2.41321	0.0158125	0.195167	9.3228	7.71969	0.259367	-2.57385	0.279705	-2.07299	-2.02577	-0.146194	-0.44734	-0.586933	-0.519739	0.0765534	-0.908804	-0.318508	-0.0269848	-0.120663	-0.117278	0.040776	0.0749081	0.192197	0.0247207	0.0340705	0.0727563	0.0399262
23639	LRRC6	0.40467	0.167786	2.41182	0.0158732	0.19567	51.761	14.5111	0.0244199	1.67132	2.25611	3.67118	1.52057	0.864492	0.3735	-0.312404	0.498966	0.774996	1.82251	0.337212	0.20954	0.082829	-0.0940591	0.08913	0.117999	0.24645	0.0491808	0.0587504	0.0491794	0.0906501
129138	ANKRD54	0.23864	0.0989701	2.41124	0.0158986	0.195738	16.3335	8.36655	0.21246	-0.791892	1.0766	1.61886	0.840817	1.54863	0.852436	2.82652	-0.208643	0.299312	0.695862	0.125789	0.286129	0.151641	0.697658	0.0694185	0.0772933	0.184769	0.0223811	0.0341372	0.0316454	0.0609232
171558	PTCRA	-0.258545	0.107274	-2.41015	0.015946	0.195866	10.1255	7.78864	0.254001	-1.26154	0.340986	1.40606	-0.675566	-1.42391	-2.14974	-2.51208	-0.346263	0.100922	0.599957	-0.272289	-0.236903	-0.45286	-0.477966	0.0753372	0.0875985	0.182067	0.162452	0.0276806	0.0443767	0.0362014
139285	AMER1	-0.219036	0.0908869	-2.40999	0.0159531	0.195866	0	4.79736	0.570054	-1.74633	-1.61022	-1.06353	-1.31055	-0.712617	-1.07294	0.674738	-0.394453	-0.43508	-0.449505	-0.366342	-0.139034	-0.22779	0.147559	0.0510199	0.073008	0.178635	0.0781388	0.0380651	0.0450734	0.0478256
201305	SPNS3	-0.219926	0.091287	-2.40918	0.0159886	0.195866	0	2.90032	0.82125	-2.06816	-1.39657	-0.550819	-0.892016	-0.830748	-0.230901	-0.796379	-0.577488	-0.421848	-0.230687	-0.198718	-0.168106	-0.0484063	-0.165381	0.0779684	0.0912407	0.175399	0.0496281	0.0409476	0.0439493	0.0431251
140885	SIRPA	0.268784	0.111625	2.40793	0.0160432	0.196234	16.7123	8.4046	0.209934	0.299742	2.53426	2.49516	1.05061	1.44114	0.172805	0.138577	0.0559677	0.633874	1.12009	0.260883	0.272092	0.0701674	0.030418	0.0348641	0.0625609	0.201516	0.0616603	0.0356465	0.164876	0.0481813
9124	PDLIM1	-0.25969	0.107863	-2.40758	0.0160586	0.196234	10.9408	7.85994	0.248545	-2.8821	-1.54705	-1.14384	0.893799	-0.95439	-0.539596	-1.24082	-0.647622	-0.404253	-0.484402	0.207209	-0.190915	-0.15923	-0.270192	0.0504923	0.0682804	0.179343	0.0537449	0.0400155	0.0870786	0.0474163
51361	HOOK1	-0.285861	0.118793	-2.40638	0.0161113	0.196634	5.76498	7.42824	0.283052	-0.421892	-0.790271	-1.98009	-0.733877	-0.139607	-0.561843	-2.93346	-0.125741	-0.255503	-0.864187	-0.294391	-0.0268136	-0.136105	-0.731669	0.0888282	0.10453	0.190478	0.160917	0.0368887	0.0586838	0.0622111
10775	POP4	0.184213	0.0767044	2.4016	0.0163236	0.198367	0	5.10248	0.530738	0.0917994	0.284469	-0.388965	1.90228	0.999964	-0.117138	2.44892	0.0244947	0.0948582	-0.162631	0.281492	0.148773	-0.0229335	0.497083	0.0711977	0.111194	0.174817	0.021897	0.0221349	0.0383305	0.041201
163882	CNST	-0.379608	0.158072	-2.40148	0.0163289	0.198367	57.8438	16.6049	0.0108504	-0.55323	-2.188	-2.65731	1.06424	-4.19972	-1.01029	-1.36719	-0.14384	-0.561127	-1.20561	0.217856	-0.671406	-0.378176	-0.300787	0.0676001	0.0657701	0.20584	0.0419043	0.0255581	0.140119	0.0484017
220001	VWCE	0.242672	0.101067	2.4011	0.0163459	0.198367	0	2.78218	0.835647	0.722417	0.951924	0.431014	1.26383	1.9328	1.2386	-0.25792	0.225674	0.362132	0.18028	0.284208	0.446182	0.30283	-0.0580243	0.0975855	0.14472	0.174949	0.0505704	0.0532904	0.0597774	0.0506114
5058	PAK1	0.283231	0.118009	2.40008	0.0163915	0.198576	34.8769	10.7489	0.0964547	2.07467	0.819829	3.27114	1.08128	2.15034	-0.346403	0.109162	0.356759	0.178132	1.55873	0.251306	0.374532	-0.120089	0.0229969	0.0295699	0.0472103	0.227061	0.0540164	0.0303362	0.120183	0.0443808
6015	RING1	-0.316639	0.132064	-2.39762	0.0165019	0.199667	59.9296	17.4693	0.00770487	-2.33077	-5.07987	-1.21257	-1.10154	-0.790404	-0.0981826	-0.210255	-0.397163	-0.946587	-0.514445	-0.196626	-0.109654	-0.0350584	-0.0381719	0.0290361	0.0347229	0.179996	0.0318625	0.0192464	0.127501	0.0329605
51645	PPIL1	-0.287531	0.120051	-2.39507	0.016617	0.200688	32.7289	10.4057	0.108576	0.774885	-1.62411	-2.95906	-2.05778	-0.779292	-1.25591	-1.08199	0.197592	-0.480568	-1.37272	-0.412005	-0.153304	-0.251432	-0.236472	0.0650223	0.0875541	0.215207	0.0400874	0.0386997	0.0400799	0.0477653
23119	HIC2	-0.414194	0.172952	-2.39485	0.0166271	0.200688	73.8353	26.7536	0.000161037	-1.44277	-1.90916	-0.427864	-6.55284	-1.39071	-0.217094	-1.39358	-0.285315	-0.443112	-0.178957	-1.36207	-0.204804	-0.0463116	-0.30759	0.039107	0.0538694	0.174939	0.0432056	0.0216872	0.0455076	0.0487171
4130	MAP1A	-0.31305	0.130795	-2.39344	0.0166913	0.20084	42.7605	12.2293	0.0570443	-0.0982382	-0.479286	-0.485685	-3.98394	0.328802	-2.20727	-2.11115	-0.0317872	-0.156754	-0.203258	-0.906793	0.0618746	-0.366648	-0.423447	0.104699	0.106967	0.175141	0.0518073	0.0354124	0.0275924	0.040231
65244	SPATS2	-0.236544	0.0988514	-2.39293	0.0167146	0.20084	14.7518	8.21132	0.223027	0.467506	-0.333767	-1.24576	-3.47758	-1.60767	-0.812394	-0.246607	0.129196	-0.0895779	-0.52901	-0.617534	-0.293584	-0.140572	-0.0540304	0.0763702	0.07203	0.180326	0.0315331	0.033348	0.0299409	0.0480025
5575	PRKAR1B	-0.325353	0.135973	-2.39278	0.0167214	0.20084	44.3995	12.5898	0.0500323	-1.36894	-1.86261	-0.962186	-2.96181	-0.118299	0.651417	-2.72745	-0.434139	-0.77782	-0.405743	-0.675916	-0.0213484	0.125814	-0.489927	0.100574	0.174388	0.177821	0.0520801	0.0325662	0.0373029	0.0322663
79180	EFHD2	0.436213	0.182404	2.39147	0.0167813	0.201071	73.0108	25.9363	0.000228811	1.35132	-0.407657	3.52652	1.63666	1.17602	0.232999	5.35865	0.211063	-0.0910881	1.72333	0.395359	0.204457	0.0933014	1.01429	0.0243952	0.0499268	0.238805	0.0583535	0.0302256	0.16035	0.0358275
52	ACP1	-0.269825	0.112834	-2.39134	0.0167869	0.201071	13.8476	8.12514	0.229078	-1.35005	-0.747047	0.176016	-2.8649	0.522106	-0.29545	-2.40744	-0.324034	-0.252978	0.073498	-0.552681	0.0985545	-0.120544	-0.513661	0.057608	0.114675	0.17436	0.037216	0.0356316	0.166464	0.045524
10987	COPS5	-0.220691	0.0923002	-2.39101	0.0168019	0.201071	20.5821	8.81413	0.184304	0.120718	-1.11625	-1.86813	-2.93029	0.148879	-0.342226	-2.08331	0.0201627	-0.220241	-0.811181	-0.439645	0.025465	-0.124064	-0.353751	0.0278967	0.0389292	0.188547	0.0225105	0.0292565	0.131421	0.028833
9122	SLC16A4	0.265855	0.111267	2.38934	0.0168787	0.201583	34.1205	10.6255	0.100665	1.58669	1.05708	-0.658623	3.70768	0.228749	1.76206	0.524048	0.312555	0.249434	-0.27623	0.918969	0.045562	0.298852	0.102869	0.0388032	0.055679	0.175901	0.0614323	0.0396723	0.0287655	0.0385321
284996	RNF149	0.355276	0.14873	2.38872	0.0169071	0.201583	47.1158	13.2365	0.0394306	2.437	1.06581	3.60341	0.851027	0.194312	0.339382	1.18428	0.574156	0.358285	1.77546	0.182617	0.0332942	0.139672	0.252658	0.0555071	0.113005	0.24277	0.0460463	0.0293589	0.169373	0.0455153
55159	RFWD3	-0.196427	0.0822456	-2.3883	0.0169266	0.201583	0	3.27589	0.773508	-0.958285	-1.67036	0.0302108	-2.17386	-0.144971	-0.40943	-0.596846	-0.220974	-0.366503	0.0126108	-0.406844	-0.0284073	-0.092065	-0.1125	0.0531731	0.0481434	0.174246	0.0350262	0.0383969	0.0505627	0.0355289
8428	STK24	-0.21528	0.090307	-2.38387	0.0171317	0.2035	15.9685	8.33021	0.214896	-1.4197	-1.9067	-2.1427	-1.7903	-1.46313	-0.113397	0.828838	-0.26317	-0.406116	-0.942692	-0.286045	-0.212087	-0.0384283	0.144202	0.0343619	0.0453667	0.193561	0.025528	0.0210116	0.114841	0.0302693
9382	COG1	-0.182095	0.0763929	-2.38366	0.0171412	0.2035	0	5.6414	0.464534	-2.16885	-0.583221	-1.63772	-1.21344	-0.999982	-0.945736	0.479837	-0.441666	-0.147551	-0.70447	-0.20656	-0.167927	-0.2109	0.0798258	0.0414695	0.0640055	0.185031	0.0289773	0.0282006	0.0497295	0.0276757
224	ALDH3A2	0.185434	0.0778234	2.38275	0.0171839	0.2035	0	3.60919	0.72939	0.625872	2.03569	-0.16627	1.03132	1.75302	-0.331024	0.690667	0.137217	0.425636	-0.0694258	0.176453	0.282225	-0.0691644	0.154248	0.0480667	0.0437172	0.174347	0.0292733	0.025919	0.0436563	0.0498773
10907	TXNL4A	-0.460362	0.193219	-2.3826	0.017191	0.2035	77.4524	31.0454	2.48484e-05	-1.47633	-0.556046	-3.08564	-5.58675	-0.234642	0.233414	-2.4498	-0.40971	-0.161714	-1.44638	-1.17109	-0.0345637	0.0418549	-0.474634	0.0770174	0.0845816	0.219721	0.0439399	0.0216985	0.0321541	0.0375366
26092	TOR1AIP1	0.211932	0.0889501	2.3826	0.017191	0.2035	0.517917	7.03644	0.31749	1.70046	1.35316	2.2128	2.04068	0.501827	-0.322037	-0.298592	0.382782	0.343506	0.977144	0.270047	0.0860042	-0.115276	-0.0649416	0.0506721	0.0644427	0.194999	0.0175117	0.0293718	0.128134	0.0473029
409	ARRB2	0.300641	0.126318	2.38004	0.0173108	0.20441	43.6506	12.4225	0.0531804	1.2011	-1.12406	2.32067	2.34065	1.70064	-0.185307	3.21821	0.247328	-0.268439	1.03093	0.467654	0.348448	-0.0582076	0.532622	0.0424021	0.0570317	0.197347	0.0399186	0.0419809	0.0986681	0.0273911
47	ACLY	-0.39723	0.166971	-2.37903	0.0173583	0.20441	73.1447	26.0656	0.000216465	0.692238	-2.1223	-3.0693	-4.83539	-0.756733	-0.28033	-1.96162	0.110039	-0.393985	-1.43674	-0.925798	-0.109096	-0.0909316	-0.444647	0.0252687	0.0344625	0.219117	0.036658	0.0207842	0.105218	0.0513806
51363	CHST15	0.293883	0.123536	2.37893	0.017363	0.20441	29.1758	9.88363	0.129639	0.748614	1.39602	3.46515	1.12646	0.876463	-0.0123157	1.21556	0.15362	0.34731	1.68262	0.301963	0.147127	-0.00497284	0.267768	0.0421097	0.0618941	0.23579	0.0718582	0.0281785	0.163037	0.0485248
8565	YARS	-0.318005	0.133686	-2.37874	0.0173718	0.20441	53.6606	15.1059	0.0194485	-0.79511	-3.45425	-3.40318	-1.29756	-0.290828	-0.583603	-0.519934	-0.134875	-0.678985	-1.64227	-0.250342	-0.056835	-0.185016	-0.0998877	0.0287746	0.0386378	0.232874	0.0372233	0.0381908	0.100504	0.0369086
5698	PSMB9	0.240202	0.101086	2.37622	0.017491	0.205492	1.39828	7.09927	0.311765	0.136883	-0.360246	1.83627	0.351121	1.93021	-0.0922336	2.71346	0.0364924	-0.104394	0.79624	0.083403	0.341988	-0.0286059	0.495452	0.0710727	0.0839765	0.188025	0.0564224	0.0313914	0.0961907	0.0333394
27335	EIF3K	-0.308604	0.129889	-2.37591	0.0175055	0.205492	49.7538	13.9314	0.030412	-1.90991	-0.442987	-2.07671	-4.18428	0.774645	0.276922	-2.58752	-0.379537	-0.0977755	-0.910607	-0.613722	0.171907	0.0940295	-0.480696	0.0394899	0.0487167	0.192269	0.021513	0.0492473	0.115296	0.0345122
147339	C18orf25	0.201231	0.0847836	2.37347	0.0176219	0.206243	14.3325	8.17113	0.225832	2.64105	-0.171504	0.13968	0.220019	2.79357	-0.516475	1.62258	0.438286	-0.0302585	0.0583182	0.0384431	0.364823	-0.14336	0.320204	0.0275399	0.0311275	0.174316	0.0305291	0.0170546	0.077047	0.0389443
1662	DDX10	-0.264372	0.111403	-2.37312	0.0176385	0.206243	32.4392	10.361	0.110248	0.75893	-1.51278	-1.34415	-2.25409	-0.0225333	-1.4015	-2.71202	0.137783	-0.320347	-0.572434	-0.429058	-0.00454735	-0.342405	-0.618871	0.0329598	0.0448425	0.181366	0.0362318	0.0407257	0.0596887	0.0520731
5412	UBL3	0.208539	0.087966	2.37068	0.0177553	0.207187	0	6.13417	0.40833	1.78656	1.81834	1.75976	-0.488113	0.631701	-0.199874	1.2742	0.333733	0.444412	0.760613	-0.108739	0.112018	-0.0657608	0.278503	0.034895	0.0597339	0.186819	0.0496289	0.0314453	0.108248	0.0477732
10100	TSPAN2	0.244657	0.103266	2.36919	0.0178269	0.207776	0	4.57458	0.599412	0.929845	1.48153	2.00515	0.821483	1.33985	-0.0489805	0.796904	0.346783	0.602058	0.876164	0.232783	0.267059	-0.00979995	0.223726	0.139089	0.165142	0.190931	0.0802979	0.0397284	0.0400314	0.0788171
677	ZFP36L1	0.250318	0.10577	2.36663	0.0179509	0.208759	2.30316	7.16502	0.305855	1.89317	0.719094	2.41487	1.86699	0.339083	0.182601	0.147629	0.497572	0.273135	1.07872	0.361366	0.0727824	0.0694692	0.0260406	0.0690766	0.144273	0.199539	0.0374636	0.0460723	0.144737	0.0311143
89781	HPS4	-0.264252	0.11166	-2.36657	0.0179537	0.208759	46.6862	13.1298	0.0410203	-1.91223	-2.76732	-0.383506	-3.32832	-0.875072	0.441454	-0.325957	-0.358731	-0.571281	-0.160341	-0.729023	-0.134333	0.0716514	-0.059536	0.0351931	0.0426168	0.174801	0.0479769	0.0235657	0.0263437	0.0333609
9443	MED7	0.187483	0.0792558	2.36554	0.0180038	0.209095	0	4.52284	0.606295	1.64963	1.64407	1.44298	0.432486	1.25302	-0.0187323	0.924512	0.490764	0.523503	0.616446	0.0724808	0.171315	-0.00384588	0.208125	0.0885062	0.101391	0.182503	0.0280868	0.0186927	0.0421512	0.0506782
114880	OSBPL6	-0.212642	0.0899357	-2.36438	0.0180604	0.209505	0	1.22051	0.975859	-1.81633	-0.724413	-0.109717	-0.471122	-1.09452	-1.0674	-0.644716	-0.413092	-0.184961	-0.0458045	-0.136698	-0.278263	-0.178491	-0.143762	0.0517256	0.065191	0.174288	0.0841899	0.0646345	0.0279625	0.0497225
6821	SUOX	-0.245161	0.103757	-2.36284	0.0181356	0.21013	30.4233	10.0608	0.122113	-0.790967	-0.672139	0.273839	-3.92277	-1.50153	-0.223176	-1.06552	-0.148945	-0.13626	0.1144	-0.862942	-0.240542	-0.0475183	-0.215584	0.0354595	0.0410981	0.174527	0.0483926	0.0256632	0.0453345	0.0409363
221061	FAM171A1	-0.228208	0.0966233	-2.36183	0.0181851	0.210222	0	4.51869	0.606847	-1.21324	-0.304763	-2.07928	-1.58472	-1.25732	-0.338827	-0.04109	-0.279672	-0.0832349	-0.91185	-0.393368	-0.286907	-0.0924628	-0.00900442	0.0531381	0.0745913	0.192318	0.0616161	0.0520702	0.0744696	0.0480219
9473	THEMIS2	0.286887	0.121469	2.3618	0.0181863	0.210222	29.4437	9.92115	0.128012	0.17599	1.43147	3.00728	0.220861	1.58135	0.0313381	2.21858	0.0417984	0.396957	1.40051	0.0659161	0.333943	0.00642759	0.430633	0.0564083	0.0768993	0.216882	0.0890726	0.0445951	0.0420677	0.037676
91445	RNF185	0.272047	0.115234	2.36083	0.0182343	0.210399	39.4983	11.5699	0.0722805	1.39639	-0.765816	0.635161	2.56237	1.80905	-0.344743	3.41828	0.357078	-0.211626	0.266301	0.544088	0.259997	-0.066669	0.62233	0.0653902	0.0763643	0.175784	0.0450873	0.0206556	0.0373988	0.0331456
51167	CYB5R4	0.348483	0.14765	2.36019	0.0182655	0.210399	57.6806	16.5409	0.0111272	2.77892	1.36295	3.31901	2.79196	0.52801	0.050942	-0.339651	0.599863	0.392088	1.58865	0.497352	0.0817519	0.0166936	-0.0688508	0.0465962	0.0827578	0.229108	0.031733	0.0239724	0.107386	0.0410916
5884	RAD17	-0.366271	0.155187	-2.36019	0.0182658	0.210399	70.7549	23.9356	0.00053669	-0.23233	0.821467	-2.65403	-3.95154	-3.40518	-0.151709	-2.54564	-0.041868	0.170135	-1.20385	-0.888654	-0.481012	-0.0252658	-0.589184	0.0324755	0.042895	0.205748	0.0505746	0.019954	0.0277361	0.0535682
79913	ACTR5	-0.259491	0.110093	-2.35702	0.0184221	0.211703	38.7338	11.4256	0.0760816	-2.05803	-2.85017	-1.37377	-2.52238	0.0223993	-0.864644	0.818872	-0.363881	-0.493399	-0.585581	-0.594517	0.00368782	-0.184006	0.180793	0.031262	0.0299679	0.181697	0.055553	0.0271064	0.0452887	0.0487452
64757	2019-03-01	0.35462	0.150707	2.35304	0.0186206	0.213089	37.8387	11.261	0.0806363	3.35532	1.3848	2.80762	0.308826	0.480814	0.157798	0.299644	0.761643	0.416324	1.28746	0.107846	0.0966487	0.0559253	0.0806724	0.051527	0.0903836	0.210276	0.121949	0.0404053	0.125607	0.0724833
8993	PGLYRP1	0.323575	0.137518	2.35297	0.0186241	0.213089	0	4.14247	0.657404	0.696261	-0.0232426	2.47593	0.957031	1.08736	0.797099	0.574266	0.228081	-0.00941234	1.11012	0.516658	0.275522	0.355898	0.197373	0.107308	0.163994	0.201033	0.291444	0.064205	0.199355	0.118127
26253	CLEC4E	0.284911	0.121089	2.35291	0.018627	0.213089	5.28935	7.39093	0.286201	1.13632	1.62242	2.81726	0.346965	1.29412	0.550804	-0.134601	0.320776	0.563237	1.2928	0.131578	0.256628	0.130789	-0.0378859	0.0796898	0.120518	0.210576	0.143811	0.039324	0.0563829	0.0792246
4649	MYO9A	-0.272772	0.115932	-2.35286	0.0186297	0.213089	40.4965	11.764	0.0674454	0.152551	-1.82457	-1.10479	-3.92426	0.153044	-0.577294	-1.78027	0.0309915	-0.450815	-0.467409	-0.649568	0.0269048	-0.128044	-0.389361	0.0412717	0.0610484	0.178992	0.0273989	0.0309049	0.0491954	0.0478337
54625	PARP14	0.25007	0.106325	2.35195	0.0186755	0.213089	15.9986	8.33319	0.214695	0.162834	0.327919	2.05698	1.62872	1.52605	-0.6709	2.58262	0.0362938	0.0841426	0.901074	0.36579	0.249916	-0.190392	0.571886	0.0496795	0.0658413	0.191893	0.0504394	0.0268195	0.0805346	0.0490339
1604	CD55	0.206202	0.0876747	2.3519	0.018678	0.213089	0	4.16441	0.654438	1.72353	1.3654	1.71967	0.648038	0.16576	0.0465559	1.20586	0.392752	0.401867	0.74208	0.257044	0.0263409	0.019713	0.185218	0.0519279	0.0866246	0.186214	0.15733	0.0252522	0.17929	0.0235924
51611	DPH5	-0.386539	0.164375	-2.35157	0.0186943	0.213089	71.3783	24.4569	0.000430235	-1.5378	-0.648115	-2.36998	-6.43637	-1.8476	0.152223	-0.477749	-0.294341	-0.137212	-1.05585	-1.04007	-0.279676	0.0390358	-0.120224	0.0366354	0.0448211	0.198477	0.0261122	0.0229137	0.065761	0.0633261
1460	CSNK2B	-0.285787	0.121621	-2.34982	0.0187826	0.213847	51.8146	14.5272	0.0242705	-2.05936	-1.59807	-2.11031	-3.70378	1.21331	0.278085	-2.12636	-0.396236	-0.318975	-0.926905	-0.570706	0.229747	0.0958768	-0.29426	0.0370207	0.03984	0.19292	0.0237429	0.0358557	0.11887	0.0191508
27327	TNRC6A	-0.171966	0.0732101	-2.34894	0.0188269	0.214105	0	5.30503	0.505327	-0.695533	-1.57847	-1.69516	-1.35113	-1.34253	-0.914572	0.713638	-0.12472	-0.305766	-0.730794	-0.277354	-0.188183	-0.213944	0.129125	0.0321543	0.0375239	0.185852	0.0421381	0.0196478	0.0547224	0.032739
65010	SLC26A6	0.334541	0.142475	2.34806	0.0188713	0.21421	53.9761	15.2095	0.0186886	0.850359	0.732041	1.69502	4.55594	1.12427	-0.383742	1.36287	0.193077	0.172675	0.730728	0.975243	0.236483	-0.0751002	0.322933	0.0515533	0.0556403	0.18585	0.0458215	0.0442445	0.0383004	0.0561455
80739	MPIG6B	-0.292582	0.124618	-2.34784	0.0188825	0.21421	32.4178	10.3578	0.110372	-1.47815	-0.824746	-0.716098	1.80376	-2.53634	-1.98037	-2.34358	-0.321845	-0.250179	-0.300596	0.554657	-0.513059	-0.335677	-0.622004	0.0474088	0.0920157	0.176207	0.0945567	0.0409184	0.0287311	0.0704411
94120	SYTL3	0.253046	0.107815	2.34704	0.0189233	0.21421	1.71474	7.12213	0.309701	1.01938	0.457563	2.74379	0.393	2.11303	0.385452	0.27638	0.216014	0.128486	1.25238	0.112205	0.456632	0.118388	0.0603073	0.044905	0.0788516	0.208339	0.0815154	0.0467007	0.0943361	0.0476132
285533	RNF175	0.367797	0.156814	2.34544	0.0190046	0.214883	48.4904	13.5897	0.0345708	-0.452334	1.89493	3.5415	0.760699	2.22288	1.24063	0.440124	-0.12884	0.61827	1.73339	0.226643	0.539026	0.221596	0.109359	0.0811304	0.106456	0.23956	0.0887687	0.0588013	0.0319034	0.0617385
64782	AEN	-0.284681	0.121427	-2.34446	0.0190545	0.215016	34.5245	10.691	0.0984083	-0.0969685	-1.56071	-0.657261	-1.0381	-0.488076	-0.26999	-4.21634	-0.0203094	-0.389232	-0.275654	-0.303863	-0.0906903	-0.069808	-0.778544	0.0438666	0.0621971	0.175894	0.0856795	0.0345261	0.0668519	0.0340953
10422	UBAC1	-0.307198	0.131037	-2.34435	0.0190601	0.215016	39.1179	11.4976	0.0741613	-0.536522	-0.283325	-1.17796	-5.08105	0.0910582	-0.143972	-2.05386	-0.132974	-0.0746984	-0.499299	-0.67425	0.0202984	-0.0570873	-0.513941	0.0614271	0.0695106	0.179662	0.017609	0.0496919	0.157225	0.0626162
55544	RBM38	-0.258497	0.110344	-2.34265	0.0191472	0.215751	0	5.0114	0.542351	-1.15833	-1.21513	-1.65596	0.346373	-0.308585	-0.325724	-2.14887	-0.354866	-0.408795	-0.71281	0.117528	-0.0591952	-0.143958	-0.532865	0.0938562	0.113179	0.185288	0.115132	0.036798	0.195331	0.0614913
56996	SLC12A9	0.221128	0.0944488	2.34124	0.0192196	0.215949	0	6.54647	0.36483	0.659637	2.79961	1.65782	-0.303203	0.494042	0.551891	0.941532	0.138038	0.589099	0.713659	-0.0706557	0.0938342	0.208883	0.207229	0.0437913	0.0442773	0.185314	0.0543034	0.036074	0.143251	0.0484429
50	ACO2	-0.300824	0.1286	-2.33923	0.0193235	0.216584	44.9262	12.7102	0.0478754	-1.77561	0.682979	-2.40524	-2.03834	-0.033318	-0.410489	-3.43387	-0.378552	0.188237	-1.07379	-0.294963	-0.00736362	-0.1093	-0.739546	0.0454522	0.0759617	0.199308	0.0209403	0.0488454	0.0708982	0.0463833
55069	TMEM248	-0.311394	0.133126	-2.33908	0.0193312	0.216584	67.7383	21.6975	0.00137353	0.319876	0.904077	-2.97292	-3.91589	-2.24872	-0.977338	-3.21999	0.0504375	0.189707	-1.38067	-0.612139	-0.247454	-0.278433	-0.507353	0.0248624	0.0440309	0.215683	0.0244366	0.0121092	0.081162	0.0248262
27350	APOBEC3C	-0.293646	0.125588	-2.33817	0.0193785	0.216867	31.5855	10.2317	0.115226	-1.41807	-2.04608	-0.690586	-2.79599	0.951263	-0.79318	-1.38082	-0.39709	-0.601485	-0.289773	-0.613921	0.171938	-0.174709	-0.374918	0.0784124	0.0864177	0.176068	0.0482119	0.0326696	0.0485162	0.0737219
84154	RPF2	-0.186639	0.0798727	-2.33671	0.0194543	0.217222	0	4.43472	0.618062	-1.01666	-0.904043	-2.26451	-1.02103	-0.460509	-0.0768157	-1.28669	-0.190884	-0.195099	-1.00281	-0.171681	-0.0764194	-0.0218302	-0.305448	0.0352521	0.0465729	0.196104	0.0282725	0.0275379	0.0807636	0.0563547
55215	FANCI	0.211052	0.0903419	2.33615	0.0194833	0.217299	0	6.08395	0.413852	0.592536	0.0634346	-0.753115	2.82401	1.08237	0.203885	1.24412	0.190842	0.0223176	-0.316324	0.586412	0.200278	0.0380582	0.276092	0.103733	0.123778	0.176418	0.0431195	0.0342385	0.0348437	0.0492472
10490	VTI1B	-0.362453	0.15526	-2.33449	0.01957	0.218018	58.0093	16.6703	0.0105743	-2.08586	0.912784	-1.79327	-4.26	0.316651	-0.688227	-3.14421	-0.519765	0.305096	-0.776173	-0.677953	0.0608101	-0.19131	-0.70703	0.0620932	0.111722	0.187339	0.0253267	0.03688	0.0772702	0.0505652
51506	UFC1	-0.416237	0.178351	-2.3338	0.019606	0.218173	75.144	28.1622	8.75797e-05	-1.45311	-3.67421	-3.30075	-4.74877	-0.480686	-0.128169	0.754392	-0.261768	-0.759568	-1.57719	-0.819249	-0.0831312	-0.0411929	0.143434	0.0324517	0.0427373	0.228319	0.0297626	0.0299092	0.103294	0.0361503
7041	TGFB1I1	-0.319723	0.137062	-2.3327	0.019664	0.21857	54.4143	15.3557	0.0176635	-2.10967	-0.862856	-0.921467	-4.34482	-0.625764	0.68236	-1.66696	-0.480422	-0.227884	-0.388242	-0.771168	-0.118152	0.111876	-0.456128	0.0518578	0.0697514	0.177519	0.0315032	0.0356502	0.0268812	0.0748722
51567	TDP2	0.453047	0.194388	2.33063	0.0197728	0.219532	71.2824	24.3753	0.00044541	1.12536	1.59339	2.97994	4.63041	2.36071	-0.719262	-0.195475	0.436707	0.696909	1.38471	0.939974	0.411234	-0.143706	-0.0375749	0.150591	0.191297	0.215926	0.0412091	0.0303453	0.0399184	0.0369499
147807	ZNF524	0.335545	0.144003	2.33013	0.0197991	0.219575	59.5141	17.2899	0.00827468	-0.102969	0.567449	0.914812	1.02046	2.50948	0.467164	5.77272	-0.0266734	0.14565	0.385386	0.189783	0.409059	0.120808	0.94871	0.0671036	0.0658824	0.177471	0.0345878	0.0265708	0.0668734	0.0270089
51266	CLEC1B	-0.263785	0.113314	-2.32791	0.0199169	0.220386	0	2.81729	0.831404	-1.16277	-1.15714	-0.106379	0.824617	-1.52243	-0.623674	-1.46539	-0.296586	-0.316087	-0.0444107	0.374921	-0.341331	-0.217446	-0.454117	0.06506	0.0746173	0.174285	0.206717	0.0502662	0.121559	0.0960351
2079	ERH	-0.184791	0.079397	-2.32743	0.0199423	0.220418	0	4.66778	0.587072	-1.6349	-1.14917	-1.86533	-1.22607	-0.933893	-0.24555	0.419612	-0.351629	-0.276178	-0.809864	-0.198279	-0.139281	-0.080219	0.0898066	0.0462579	0.0577575	0.188501	0.0261532	0.0222427	0.106727	0.0458059
23517	MTREX	-0.210915	0.0906417	-2.32691	0.01997	0.220477	8.23443	7.62813	0.266632	0.66851	-0.277891	-0.666674	-3.40679	-1.72125	-0.269504	-0.781777	0.139356	-0.0774753	-0.27964	-0.531439	-0.239029	-0.0688572	-0.18225	0.0434544	0.0777281	0.175942	0.0243341	0.0192846	0.0652781	0.0543464
4771	NF2	-0.222438	0.0956335	-2.32594	0.0200217	0.220799	31.7063	10.2498	0.114517	-0.384147	-2.33235	-0.557457	-3.34584	-1.59829	0.282067	-0.173386	-0.0748358	-0.523277	-0.233486	-0.562844	-0.229477	0.0439047	-0.0350823	0.037951	0.0503358	0.175428	0.0282986	0.0206142	0.024228	0.0409399
23511	NUP188	-0.340336	0.146465	-2.32367	0.0201432	0.221892	60.3794	17.6676	0.00711889	-0.168785	-1.31503	-2.23547	-4.19508	0.386323	-0.691229	-2.12418	-0.0427084	-0.403189	-0.988367	-0.86467	0.0597102	-0.12607	-0.413644	0.0640264	0.0940037	0.195479	0.0424836	0.023889	0.0332646	0.0379204
56652	TWNK	-0.293829	0.126491	-2.32293	0.0201832	0.222082	36.3702	11.0011	0.0883411	-1.97119	-2.16313	-1.62732	-2.28066	-0.553032	0.77356	-0.822917	-0.524367	-0.664439	-0.699723	-0.651507	-0.104513	0.150766	-0.155748	0.0707641	0.0943507	0.184886	0.0816048	0.0357141	0.0379857	0.0358205
8805	TRIM24	-0.293936	0.126562	-2.32247	0.0202078	0.222105	55.2742	15.6509	0.0157554	0.844378	-1.36585	-2.26963	-1.73192	-1.17475	-0.585564	-3.67671	0.143215	-0.266774	-1.00536	-0.476306	-0.155968	-0.121958	-0.729194	0.0287674	0.038149	0.196215	0.0756338	0.0176271	0.0433783	0.039334
23788	MTCH2	-0.181123	0.0780361	-2.32101	0.0202863	0.222719	0	5.2979	0.506212	-1.43204	-0.177402	-1.4403	-0.216993	-2.40081	0.326178	-0.781641	-0.338245	-0.0457766	-0.615247	-0.0434019	-0.347107	0.0593035	-0.164047	0.0557893	0.0665844	0.182471	0.0400061	0.0209032	0.0330561	0.0440477
8942	KYNU	0.22579	0.0973339	2.31974	0.0203548	0.223222	0	1.2488	0.974406	1.42752	0.847498	0.850767	0.0837269	1.63542	0.464735	0.502547	0.321865	0.235639	0.357958	0.024875	0.315416	0.144613	0.116035	0.0508378	0.0773065	0.177028	0.0882662	0.037197	0.0968281	0.0533115
5837	PYGM	0.208008	0.0897397	2.3179	0.0204546	0.224067	0	4.36547	0.627346	1.33431	1.02055	1.37277	1.17337	1.59627	-0.434555	0.958147	0.338044	0.29733	0.585137	0.305661	0.354586	-0.0758084	0.197872	0.0641846	0.0848815	0.181686	0.0678599	0.0493438	0.030433	0.0426484
80895	ILKAP	0.196783	0.0849187	2.31731	0.0204868	0.224169	1.99132	7.14222	0.307894	1.18226	1.63138	0.332716	-0.570019	0.745517	0.961566	2.69173	0.264289	0.416893	0.139051	-0.0884619	0.121871	0.199506	0.507189	0.0499723	0.0653039	0.174663	0.0240843	0.0267228	0.043048	0.0355041
91869	RFT1	-0.223331	0.0964718	-2.31499	0.0206135	0.224436	17.2362	8.45781	0.206444	-1.83427	-0.190512	-1.30061	-3.16313	-1.10939	-0.0707985	0.203268	-0.424298	-0.0495126	-0.553172	-0.536222	-0.213659	-0.0117539	0.0424284	0.0535077	0.0675441	0.180895	0.028738	0.0370912	0.0275625	0.0435686
27202	C5AR2	0.391239	0.169057	2.31424	0.0206546	0.224436	58.4265	16.8377	0.00989877	0.447741	2.81113	3.48385	0.732921	1.92489	-0.367138	0.967777	0.137165	0.993239	1.69494	0.241717	0.343075	-0.0638857	0.229944	0.0938495	0.124837	0.236695	0.108768	0.0317662	0.0302795	0.0564537
51398	WDR83OS	-0.500278	0.216186	-2.31411	0.0206619	0.224436	81.1429	37.1212	1.66762e-06	-1.19283	-0.30366	-3.34412	-7.08373	0.286293	-0.0304005	-4.1082	-0.221334	-0.0694508	-1.60451	-1.13306	0.0653631	-0.010169	-0.794302	0.0344301	0.0523094	0.230209	0.0255847	0.0521245	0.111891	0.0373825
51593	SRRT	-0.370803	0.160244	-2.31399	0.020668	0.224436	73.5013	26.4164	0.000186185	-0.260005	-3.89288	-3.25093	-4.57728	-1.59617	-0.0151729	0.693009	-0.045528	-0.77602	-1.54621	-0.642039	-0.225209	-0.00527943	0.131867	0.0306615	0.0397379	0.226216	0.0196747	0.0199073	0.121071	0.0362074
84295	PHF6	-0.18423	0.0796168	-2.31396	0.0206702	0.224436	3.78524	7.27539	0.296128	-0.432526	-1.82894	-2.13354	0.147414	-2.15643	-0.129742	-1.02531	-0.0761462	-0.389888	-0.93822	0.0280253	-0.299546	-0.0206023	-0.223461	0.0309937	0.0454447	0.193378	0.036143	0.0192954	0.0252154	0.0474998
55633	TBC1D22B	-0.245052	0.105903	-2.31394	0.0206709	0.224436	0	5.73956	0.452988	-1.10868	-0.995807	-2.1912	0.306252	-0.646673	-0.319984	-1.8594	-0.328209	-0.310822	-0.966488	0.0776256	-0.136286	-0.102535	-0.487799	0.0876376	0.0974255	0.194549	0.0642468	0.0444156	0.10268	0.0688233
90135	BTBD6	-0.359965	0.155659	-2.31252	0.0207493	0.225039	68.5302	22.2436	0.00109375	-1.83321	-3.73729	-0.460273	-5.03502	0.221447	-0.785398	-0.209697	-0.353982	-0.700291	-0.192573	-0.964916	0.0361091	-0.215778	-0.0411215	0.0372853	0.0351111	0.175049	0.0367263	0.0265885	0.0754808	0.038455
399665	FAM102A	-0.468163	0.202574	-2.31107	0.0208292	0.225657	75.281	28.3183	8.18386e-05	-2.27009	-1.65567	-1.29696	-7.04613	-0.662015	-1.02206	0.113061	-0.506558	-0.468055	-0.55156	-1.33635	-0.122311	-0.273176	0.0301029	0.0497936	0.0799183	0.180856	0.0359698	0.0341345	0.0714387	0.0708903
10308	ZNF267	0.200343	0.0868183	2.30761	0.0210206	0.227226	0	6.91191	0.329071	0.912447	1.801	1.85042	0.754096	2.08827	0.14315	-0.901914	0.174745	0.364001	0.802866	0.160802	0.354222	0.025084	-0.272099	0.0366771	0.0408485	0.188255	0.0454707	0.0287724	0.030705	0.0910174
23212	RRS1	-0.221201	0.0958737	-2.30721	0.0210433	0.227226	0	3.84992	0.696978	-2.00656	-0.551124	-0.389735	0.75993	-1.9463	-0.466827	-0.328194	-0.456179	-0.15544	-0.162954	0.310751	-0.346881	-0.107621	-0.0850912	0.0516854	0.0795474	0.17482	0.167216	0.0317645	0.053147	0.0672215
29093	MRPL22	-0.293046	0.127087	-2.30586	0.0211183	0.227786	50.2438	14.0686	0.0288791	-1.11826	-1.14381	-4.11914	-1.09869	-0.906279	-0.87588	-0.853881	-0.236088	-0.242023	-2.16431	-0.154706	-0.15707	-0.251889	-0.184476	0.0445721	0.044772	0.276073	0.0198271	0.0300375	0.0827046	0.0466751
7292	TNFSF4	-0.229128	0.0995036	-2.30271	0.0212953	0.229437	0	4.37007	0.626729	-0.447638	0.63013	-0.472373	-1.94809	-1.61042	-1.54467	-0.27826	-0.110378	0.183425	-0.19766	-0.542932	-0.370216	-0.322921	-0.0791408	0.0608007	0.0847339	0.175092	0.0776732	0.0528487	0.0437038	0.0808909
84984	CEP19	0.350527	0.152251	2.3023	0.021318	0.229437	47.806	13.4115	0.0369473	0.586832	0.943446	3.30464	3.20123	1.26219	-0.465422	0.541792	0.129128	0.276161	1.57963	0.740776	0.237658	-0.186158	0.132095	0.0484188	0.0856824	0.228486	0.0535476	0.035453	0.159981	0.059444
57823	SLAMF7	0.316279	0.137409	2.30173	0.0213505	0.229518	38.5507	11.3915	0.0770044	1.3123	-0.928902	0.789451	1.88281	0.527659	1.31434	3.56194	0.34967	-0.285812	0.331791	0.668865	0.102492	0.24198	0.880553	0.070999	0.0946722	0.176636	0.126201	0.0377286	0.0338958	0.0611136
79728	PALB2	-0.224669	0.0976254	-2.30134	0.0213722	0.229518	15.6286	8.29665	0.217165	0.906692	-1.09137	-1.52471	-2.8751	-0.625838	-1.04709	-1.22129	0.209076	-0.283386	-0.653168	-0.582495	-0.102022	-0.201665	-0.24745	0.0531725	0.0674233	0.183517	0.0410468	0.0265743	0.0370931	0.041052
133	ADM	0.322222	0.140093	2.30006	0.021445	0.229941	34.0005	10.6061	0.101339	1.76166	1.37183	2.48888	2.15448	0.807563	0.777045	-0.86932	0.413868	0.390703	1.11684	0.654693	0.151397	0.363607	-0.189353	0.0551928	0.081114	0.201358	0.0923399	0.0351464	0.218963	0.0474446
7011	TEP1	0.46375	0.201646	2.29982	0.0214584	0.229941	79.6239	34.354	5.74711e-06	1.46611	-0.559822	2.50816	5.9199	-0.299624	1.00181	4.36218	0.350382	-0.157768	1.12685	1.12668	-0.0498162	0.197656	0.827396	0.057115	0.079421	0.201847	0.0362218	0.0276433	0.0389269	0.0359767
5209	PFKFB3	0.321877	0.140027	2.29868	0.0215231	0.230134	27.5523	9.66214	0.13962	2.0313	0.512565	2.34242	2.40585	-0.294677	0.774195	0.250111	0.533882	0.191416	1.04189	0.618298	-0.0526079	0.308657	0.0712485	0.0690781	0.139464	0.197841	0.066048	0.031872	0.158946	0.0811497
196264	MPZL3	0.266424	0.115989	2.29698	0.0216198	0.230743	15.1545	8.25029	0.220334	0.191664	1.12264	3.05178	0.59002	0.276315	1.61592	1.15531	0.0568034	0.365928	1.42645	0.232648	0.0485459	0.287623	0.271026	0.0878353	0.106246	0.218476	0.155476	0.0308671	0.0316818	0.0550332
57505	AARS2	-0.176506	0.0768467	-2.29685	0.021627	0.230743	0	5.0249	0.540624	-1.65654	-0.454855	-0.944612	-2.15639	0.63782	-1.05499	-0.536008	-0.357013	-0.113218	-0.398184	-0.341062	0.115537	-0.227521	-0.0918077	0.0464477	0.0619561	0.177689	0.0250157	0.0328131	0.0465097	0.0293369
55651	NHP2	-0.341429	0.149011	-2.2913	0.0219463	0.233392	58.6744	16.9387	0.00951132	-1.93364	-1.05664	-2.47456	-4.81981	0.445213	0.156708	-1.03517	-0.400837	-0.250547	-1.10942	-0.806652	0.104588	0.0401886	-0.220137	0.0429717	0.0562248	0.200999	0.02801	0.0551861	0.0657691	0.0452234
79068	FTO	-0.197151	0.0860437	-2.29129	0.0219465	0.233392	0	5.84796	0.440435	-0.0484301	-1.7043	-1.76216	-2.08707	-0.714739	-0.453559	-0.115522	-0.0114347	-0.480243	-0.761727	-0.450424	-0.130732	-0.0962978	-0.0228131	0.0557466	0.0794021	0.186856	0.0465765	0.0334554	0.045078	0.0389978
79871	RPAP2	-0.18898	0.0825094	-2.29041	0.0219975	0.233479	0	4.30221	0.635852	-0.738884	-0.445592	-1.82832	-2.10919	0.0739859	-0.790725	-0.617661	-0.182252	-0.121707	-0.792524	-0.338691	0.0127435	-0.184813	-0.134999	0.0608406	0.074603	0.187897	0.0257854	0.0296676	0.0546276	0.0477705
7248	TSC1	-0.258476	0.112855	-2.29033	0.0220022	0.233479	23.6872	9.17277	0.164092	-0.279817	0.924549	-1.96993	-2.30839	-0.624608	-0.940331	-2.45834	-0.0707376	0.303366	-0.859341	-0.536175	-0.0988879	-0.226677	-0.487842	0.0639076	0.107665	0.190296	0.0539502	0.0250652	0.0581105	0.0393799
9681	DEPDC5	-0.163646	0.0715249	-2.28796	0.02214	0.234208	0	4.42333	0.619588	-0.911995	-1.8203	0.660569	-1.27252	-1.8432	-0.244513	-0.0044684	-0.147909	-0.355782	0.277054	-0.316931	-0.284905	-0.0380868	-0.000869642	0.0263028	0.0382017	0.175911	0.0620294	0.0238922	0.0242631	0.0378772
10489	LRRC41	-0.355067	0.155225	-2.28743	0.0221706	0.234208	67.4638	21.5145	0.00148218	-0.754967	-1.13793	-2.61342	-5.36541	-0.681775	0.00238378	-0.89957	-0.213175	-0.33066	-1.18219	-0.910094	-0.106473	0.000481912	-0.142604	0.0797291	0.0844374	0.204625	0.0287718	0.0243891	0.04087	0.02513
23258	DENND5A	0.276969	0.12112	2.28673	0.0222113	0.234208	42.4681	12.1672	0.058342	-0.476953	1.02059	2.98134	2.02541	1.36896	-0.192388	2.28391	-0.0798984	0.21254	1.38552	0.395832	0.229623	-0.0793005	0.459336	0.0280624	0.0433687	0.215974	0.0381941	0.028135	0.169901	0.0404484
254359	ZDHHC24	0.313194	0.136982	2.28638	0.022232	0.234208	51.9037	14.5541	0.0240229	-1.16913	0.38412	1.06357	3.65503	0.628532	1.50431	3.65295	-0.322708	0.13018	0.449522	0.627456	0.113455	0.288281	0.739898	0.0761894	0.114856	0.178635	0.0294702	0.0325831	0.0367249	0.0410256
23365	ARHGEF12	-0.287191	0.125625	-2.2861	0.0222487	0.234208	6.80759	7.51134	0.276132	-0.360194	0.894997	-1.57204	-2.32263	-0.568643	-0.413155	-2.26652	-0.12835	0.325383	-0.674577	-0.567623	-0.117261	-0.140189	-0.618793	0.126976	0.132174	0.184135	0.0597256	0.0425234	0.115134	0.074537
9391	CIAO1	0.268803	0.11763	2.28516	0.0223036	0.234208	44.2778	12.5623	0.0505376	-0.663659	2.53885	-0.53612	2.71627	2.8231	-0.531966	2.35321	-0.130112	0.597609	-0.224491	0.454114	0.401458	-0.156578	0.487799	0.0384368	0.0554065	0.175338	0.02795	0.0202222	0.0866354	0.0429695
3155	HMGCL	0.306986	0.134342	2.28511	0.0223063	0.234208	58.1654	16.7326	0.0103181	-0.153436	1.59857	0.37492	2.1676	2.19498	-0.597736	4.8284	-0.0307209	0.351365	0.15674	0.468725	0.42841	-0.117133	0.759217	0.040088	0.0483116	0.174776	0.0467605	0.0380942	0.038401	0.0247244
79932	KIAA0319L	0.188329	0.0824174	2.28507	0.0223089	0.234208	0	6.12801	0.409004	0.570126	-0.0307436	1.82857	1.48418	2.30723	-0.495521	0.297986	0.123835	-0.00774182	0.79264	0.280789	0.37314	-0.132601	0.0555577	0.0471785	0.0634126	0.187901	0.0357919	0.0261554	0.0716092	0.0347612
53635	PTOV1	-0.382331	0.16738	-2.28421	0.0223592	0.234409	67.0859	21.2675	0.00164224	-1.05425	-0.011178	-2.85825	-5.68655	0.168467	-0.0833646	-2.79014	-0.242462	-0.00262217	-1.31564	-0.868108	0.0417274	-0.0264123	-0.491472	0.0528931	0.0550298	0.211871	0.023305	0.0613496	0.10038	0.0310274
57504	MTA3	-0.293552	0.12856	-2.28337	0.0224083	0.2345	43.9941	12.4987	0.0517247	-1.62603	-1.30288	-2.20247	-3.69663	0.102272	-0.286893	-0.0705668	-0.441357	-0.380467	-0.972043	-0.643209	0.021252	-0.0624125	-0.0129691	0.0736752	0.0852756	0.194783	0.0302756	0.0431808	0.0473265	0.0337767
3460	IFNGR2	0.296434	0.129876	2.28243	0.0224641	0.234834	47.0597	13.2224	0.0396366	2.76982	0.185523	3.62742	0.744964	1.7274	0.00693829	0.577408	0.481602	0.0430891	1.79201	0.161851	0.264713	0.00296921	0.112092	0.0302324	0.0539432	0.244053	0.0472018	0.0234835	0.183137	0.0376864
4784	NFIX	-0.275073	0.120635	-2.28021	0.0225952	0.235572	6.10767	7.45535	0.28078	-0.679999	-0.150881	-1.20637	-2.57154	0.650061	-0.535021	-2.21384	-0.297233	-0.0607631	-0.511726	-0.563626	0.125154	-0.22371	-0.4603	0.191063	0.162185	0.179935	0.048039	0.0370665	0.174835	0.0432304
9326	ZNHIT3	-0.373333	0.163741	-2.28002	0.0226064	0.235572	68.184	22.0015	0.0012101	-3.32349	-2.46834	-1.82537	-4.71797	0.983271	-0.318522	-0.142575	-0.582489	-0.523427	-0.791144	-0.829614	0.167728	-0.0936261	-0.0394803	0.0307176	0.0449678	0.187849	0.0309202	0.0290981	0.0864003	0.0766785
3934	LCN2	0.324591	0.142395	2.27951	0.0226366	0.235636	0	4.22157	0.64672	0.989551	0.329301	2.42804	1.25843	0.640666	0.162035	0.643729	0.368333	0.131445	1.08546	0.642746	0.170388	0.078479	0.219675	0.13855	0.159331	0.199856	0.260868	0.0707321	0.23458	0.116454
5519	PPP2R1B	0.240301	0.105534	2.27699	0.0227866	0.236697	23.1885	9.11322	0.16731	0.857779	0.958504	-0.319459	3.28837	0.08461	0.398965	2.01625	0.19541	0.237113	-0.133498	0.783184	0.0164503	0.0677237	0.417087	0.0518973	0.0611959	0.17463	0.0567239	0.037801	0.0288146	0.0427922
366	AQP9	0.405234	0.178052	2.27593	0.0228505	0.236873	54.4829	15.3788	0.0175062	2.0481	1.57076	3.63908	1.07367	1.84938	0.518952	-0.981911	0.394819	0.443067	1.80009	0.484713	0.389179	0.246882	-0.219402	0.0371617	0.0795646	0.244685	0.203811	0.0442841	0.226321	0.049927
1459	CSNK2A2	-0.261923	0.115085	-2.2759	0.0228518	0.236873	45.6821	12.8871	0.0448644	0.0504307	-0.872869	-2.33653	-3.77475	-1.65562	0.449198	-1.12391	0.00930335	-0.212698	-1.03892	-0.683508	-0.220227	0.122185	-0.197883	0.0340321	0.0593787	0.197707	0.0327877	0.0176938	0.0739882	0.0309993
6915	TBXA2R	-0.334086	0.146867	-2.27475	0.022921	0.237092	66.8045	21.0872	0.0017696	-0.0187051	-4.55357	-1.00142	-0.284421	-2.60774	0.401478	-3.15256	-0.00395719	-0.907063	-0.422648	-0.0547721	-0.433289	0.0686164	-0.652291	0.0447561	0.0396799	0.178126	0.0370848	0.0276075	0.02921	0.0428111
4714	NDUFB8	-0.29689	0.130553	-2.2741	0.0229602	0.237248	52.7265	14.8075	0.0218082	-1.44067	-3.96344	-2.3094	-1.40608	-0.715483	0.102739	0.181902	-0.269043	-0.928915	-1.02526	-0.214522	-0.113157	0.0371563	0.0376813	0.0348749	0.0549296	0.197094	0.0232768	0.0250128	0.130797	0.0429116
121260	SLC15A4	0.385282	0.169593	2.2718	0.0230986	0.238177	68.3375	22.1082	0.0011574	1.93901	3.43816	3.58311	-0.798493	1.68107	-0.281637	1.41199	0.390434	0.857225	1.76157	-0.132032	0.293088	-0.0997894	0.297955	0.0405449	0.0621637	0.241702	0.0273411	0.0303964	0.125542	0.0445284
6283	S100A12	0.338057	0.148933	2.26986	0.023216	0.238818	13.9015	8.13022	0.228717	1.31004	0.106252	3.19394	0.824106	0.534071	0.767753	0.927413	0.397398	0.0421067	1.5113	0.481035	0.110184	0.368748	0.22754	0.0920202	0.157047	0.223895	0.340712	0.0425637	0.230683	0.0601959
506	ATP5F1B	-0.300435	0.132404	-2.26907	0.0232639	0.238818	56.0353	15.9219	0.0141796	-1.59897	-2.40478	-2.76453	-3.18183	1.15519	-0.135085	-1.11023	-0.213442	-0.423558	-1.26373	-0.583515	0.208253	-0.053891	-0.255493	0.0178187	0.0310224	0.20896	0.0336319	0.0324994	0.159154	0.0529579
9750	RIPOR2	0.243278	0.107235	2.26865	0.0232898	0.238818	16.5714	8.39041	0.210873	2.49931	1.31422	2.58598	0.348555	1.12147	-0.22427	-0.162467	0.409686	0.292317	1.16766	0.133109	0.202994	-0.093665	-0.0289	0.0268697	0.0494734	0.203882	0.145838	0.0327634	0.174426	0.0316419
1465	CSRP1	-0.194496	0.0857331	-2.26862	0.0232915	0.238818	0	5.47675	0.484272	-0.676761	-2.24338	-1.39416	-0.785357	0.103873	0.334632	-1.56506	-0.152654	-0.533361	-0.594653	-0.163309	0.0182457	0.118037	-0.287492	0.0508801	0.0565248	0.18193	0.0432403	0.0308543	0.124422	0.0337435
7805	LAPTM5	0.251376	0.11087	2.26732	0.0233709	0.238818	22.7602	9.06268	0.170083	1.67698	-0.304235	2.56566	-0.14255	2.76079	0.190109	1.00171	0.32383	-0.0677353	1.15694	-0.0428017	0.455468	0.0766691	0.179285	0.0372888	0.0495691	0.20334	0.090155	0.0272175	0.162643	0.0320336
25871	NEPRO	-0.281719	0.124261	-2.26715	0.0233808	0.238818	54.5109	15.3883	0.0174423	0.351331	-0.926993	-2.24816	-2.70572	-1.81909	0.565491	-2.90589	0.0721785	-0.211372	-0.994669	-0.608742	-0.259061	0.0864812	-0.579965	0.0422068	0.0519928	0.19575	0.0506175	0.0202812	0.0233879	0.0398332
27102	EIF2AK1	-0.249296	0.109962	-2.26711	0.0233837	0.238818	18.8733	8.62848	0.195575	-1.4674	-0.185554	-1.25177	-1.92267	0.493995	-0.108308	-2.84741	-0.35355	-0.049878	-0.531653	-0.344736	0.0820164	-0.0438276	-0.628898	0.0580503	0.0722564	0.180387	0.0321487	0.0275649	0.163748	0.0487819
55759	WDR12	-0.265897	0.1173	-2.26681	0.0234018	0.238818	48.2826	13.5351	0.0352833	-0.0419764	-0.0590754	-2.3276	-4.03189	-1.00848	-0.637709	-1.27626	-0.00855123	-0.0141994	-1.03442	-0.736435	-0.139997	-0.13183	-0.236181	0.0414999	0.057773	0.197504	0.0333619	0.0192711	0.0427349	0.0342461
25831	HECTD1	-0.330095	0.145639	-2.26653	0.0234191	0.238818	61.0587	17.9758	0.00629304	1.21522	-1.74377	-2.93404	-3.69789	-0.906382	-0.70972	-1.71568	0.256015	-0.462907	-1.35842	-0.633222	-0.124588	-0.237615	-0.323463	0.0443837	0.0704712	0.214358	0.0293226	0.0188941	0.112091	0.0355448
7046	TGFBR1	0.450495	0.198772	2.26639	0.0234278	0.238818	79.0813	33.4629	8.54004e-06	0.361207	-0.0733236	2.10782	6.60642	2.37359	0.0556419	2.31604	0.08992	-0.022338	0.925691	1.47765	0.355288	0.00953771	0.451053	0.0619727	0.0928111	0.192871	0.0500279	0.0224053	0.0293822	0.0379284
197259	MLKL	0.281795	0.124364	2.26589	0.023458	0.238878	21.6844	8.9382	0.177084	0.0380605	0.856865	2.94536	2.25613	0.941136	-0.0440246	0.864039	0.00910353	0.229609	1.36488	0.549535	0.201229	-0.0157789	0.200996	0.0572099	0.0718047	0.21474	0.0593282	0.045717	0.128459	0.0541138
55365	TMEM176A	0.287784	0.127124	2.2638	0.0235867	0.23994	0	3.5653	0.735263	0.410686	0.368601	2.0712	1.6122	0.196953	0.613739	1.03972	0.169858	0.163585	0.907941	0.542945	0.06364	0.148165	0.325573	0.171061	0.196957	0.192163	0.113416	0.104408	0.0582805	0.0980536
83732	RIOK1	-0.344187	0.152082	-2.26316	0.0236259	0.240091	68.4229	22.168	0.00112887	-0.215065	-1.44326	-2.52912	-5.13116	0.0761454	-0.514881	-1.54659	-0.0418031	-0.313002	-1.13778	-0.891364	0.0118496	-0.0948678	-0.371911	0.0377815	0.0470334	0.202385	0.0301773	0.0242172	0.0339488	0.0578266
222484	LNX2	-0.311497	0.137694	-2.26224	0.0236825	0.240222	34.1239	10.626	0.100646	-0.505477	0.71097	-2.43849	-3.46883	-0.60151	-0.464263	-1.5451	-0.145292	0.224923	-1.09083	-0.635346	-0.131222	-0.133987	-0.451455	0.0826189	0.100084	0.20011	0.0335471	0.0475915	0.083291	0.085372
79065	ATG9A	-0.269267	0.119031	-2.26216	0.0236876	0.240222	30.1261	10.018	0.123894	-1.7387	-0.758354	-3.25661	-0.762986	-0.100697	-0.351474	-1.53487	-0.411547	-0.174766	-1.54972	-0.1222	-0.0220495	-0.122715	-0.336882	0.0560262	0.053109	0.226452	0.0256511	0.0479476	0.121901	0.048174
10573	MRPL28	-0.187432	0.0828998	-2.26095	0.0237623	0.24065	0	5.20207	0.51817	-1.389	-0.85182	-1.09301	-1.29311	0.260508	0.455146	-2.12537	-0.341559	-0.24812	-0.46229	-0.218134	0.0520781	0.100462	-0.382309	0.0604681	0.0848454	0.178888	0.028456	0.0399638	0.0487197	0.0323563
25879	DCAF13	-0.215842	0.0954765	-2.26069	0.0237788	0.24065	14.5068	8.18778	0.224666	-0.0974832	-1.28988	-0.47116	-3.63289	-1.07126	0.10076	-0.336412	-0.0253296	-0.353405	-0.197149	-0.576485	-0.18854	0.0175312	-0.0734769	0.0675145	0.0750661	0.175087	0.0251809	0.0309756	0.0302724	0.0477044
55505	NOP10	0.195773	0.086636	2.25972	0.0238389	0.240818	0	6.66854	0.35259	0.573698	0.216353	2.25344	0.244367	2.45312	0.387032	0.816442	0.114667	0.0544166	0.997296	0.0389395	0.440196	0.161123	0.145668	0.0399494	0.0632613	0.195864	0.025392	0.0321998	0.17331	0.031833
55140	ELP3	-0.171138	0.0757526	-2.25917	0.0238728	0.240818	0	2.34158	0.885759	0.137358	-1.4857	-0.826917	-1.47234	-0.584978	-0.688101	-1.2458	0.025309	-0.286783	-0.347769	-0.257948	-0.0905148	-0.194964	-0.246648	0.03395	0.03726	0.176872	0.0306938	0.023942	0.0802791	0.0391977
1512	CTSH	0.255446	0.113077	2.25904	0.023881	0.240818	6.27916	7.46899	0.279642	-0.494456	1.02376	2.23519	2.08689	1.13625	-0.0408466	1.28678	-0.114135	0.255748	0.988227	0.648294	0.261406	-0.0146514	0.260978	0.0532826	0.0624064	0.195473	0.0965036	0.0529278	0.128662	0.0411338
55589	BMP2K	-0.358656	0.158812	-2.25837	0.0239225	0.240818	57.0994	16.3168	0.0121509	-1.32331	0.35484	-1.58038	-4.00945	0.403429	-1.02908	-2.54349	-0.276467	0.0990895	-0.678359	-1.00303	0.0747737	-0.312435	-0.585876	0.0436478	0.0779812	0.184246	0.0625833	0.0343529	0.0921756	0.053058
5880	RAC2	0.32903	0.145716	2.25802	0.0239446	0.240818	58.3366	16.8013	0.0100419	-1.17123	1.07969	1.11171	3.58397	1.77531	0.239173	3.34894	-0.222268	0.18012	0.470418	0.869764	0.355715	0.0983647	0.5923	0.0360137	0.0278309	0.179053	0.0588945	0.0401472	0.169143	0.0312801
8703	B4GALT3	-0.38894	0.172292	-2.25745	0.0239798	0.240818	66.6168	20.9687	0.00185855	-3.61858	0.156373	-3.50063	-1.99905	0.7458	-0.557161	-2.29046	-0.74089	0.0376511	-1.70606	-0.323449	0.155784	-0.178438	-0.586651	0.0419209	0.0579737	0.237517	0.0261797	0.0436317	0.102568	0.0656018
8533	COPS3	-0.16942	0.0750869	-2.25632	0.0240505	0.240818	0	3.21907	0.780891	0.119676	-1.75248	-1.3851	-0.874073	-0.745122	-0.806078	-1.15632	0.0218571	-0.30008	-0.590619	-0.113698	-0.14576	-0.297003	-0.296764	0.0333558	0.0293203	0.181826	0.0169205	0.0382666	0.135759	0.0658664
51406	NOL7	-0.181768	0.0805789	-2.25578	0.0240846	0.240818	0	3.90867	0.689034	-1.00132	-0.107506	-1.19015	-1.6077	-0.0082399	-0.0535498	-1.99472	-0.18424	-0.0209419	-0.504626	-0.267517	-0.00159901	-0.0189661	-0.426086	0.0338549	0.0379462	0.179778	0.0276881	0.0376583	0.125441	0.0456279
23350	U2SURP	-0.27309	0.121076	-2.25553	0.0241002	0.240818	42.8955	12.2582	0.0564499	0.327963	-0.854794	-0.090328	-3.9829	-1.31711	-0.237886	-2.31838	0.0641467	-0.216493	-0.0377084	-0.811049	-0.209223	-0.0588232	-0.485618	0.0382561	0.0641452	0.174273	0.0414663	0.0252331	0.0611447	0.0438751
22921	MSRB2	0.195953	0.0868843	2.25533	0.0241125	0.240818	0	3.4852	0.745937	0.545449	0.384988	1.1586	0.18911	1.22608	0.551292	2.22277	0.140555	0.0950087	0.490841	0.0309772	0.23269	0.183654	0.480771	0.0664029	0.0609021	0.17948	0.0268321	0.0360179	0.110978	0.046783
4210	MEFV	0.385381	0.170941	2.25446	0.0241673	0.240818	59.595	17.3246	0.00816146	0.106789	3.02077	3.01369	2.52323	-0.449826	0.450414	1.09981	0.0330813	0.946593	1.40422	0.612125	-0.0796138	0.128826	0.227993	0.0959657	0.0981955	0.217109	0.0588526	0.0313247	0.0818063	0.0429742
56929	FEM1C	0.38261	0.169716	2.25441	0.0241702	0.240818	63.8316	19.3539	0.0036059	3.30761	1.95495	1.71436	4.35695	0.00462519	-0.4395	-0.0696819	0.661654	0.506725	0.739633	0.974344	0.000901227	-0.143106	-0.0159056	0.0400161	0.0671855	0.186135	0.0500102	0.0379672	0.106023	0.0521024
84969	TOX2	-0.242926	0.107759	-2.25435	0.0241741	0.240818	8.59133	7.65792	0.264251	-1.30316	-2.64096	-1.96431	-0.354003	-0.227652	-0.641743	-0.415666	-0.313658	-0.766078	-0.856667	-0.101291	-0.0363078	-0.183269	-0.0934888	0.0579318	0.0841441	0.190196	0.0818707	0.0254365	0.0815562	0.0505861
8313	AXIN2	-0.350967	0.155702	-2.2541	0.0241898	0.240818	54.0993	15.2503	0.0183966	-0.61492	-1.3739	-1.80549	-4.3678	-1.07537	-1.30766	0.905044	-0.164731	-0.410206	-0.781866	-0.867974	-0.24447	-0.357749	0.187426	0.0717654	0.0891439	0.187532	0.03949	0.0516812	0.0748461	0.0428864
55726	INTS13	-0.238726	0.105924	-2.25375	0.0242116	0.240818	23.9483	9.20426	0.162412	0.463558	0.691921	-2.34243	-2.57246	-1.49509	-1.02783	-1.40872	0.119843	0.212625	-1.0419	-0.483829	-0.21672	-0.205563	-0.314585	0.066837	0.0944311	0.197841	0.0353741	0.021012	0.0399986	0.0498687
57179	KIAA1191	-0.287006	0.127391	-2.25295	0.0242621	0.241077	55.2177	15.6312	0.0158767	-2.31771	-0.18165	-0.741317	-4.59543	0.762474	-0.78153	-2.09543	-0.389786	-0.0344457	-0.311308	-0.649859	0.127112	-0.24923	-0.494559	0.0282834	0.0359581	0.176349	0.019998	0.0277922	0.101698	0.0557045
5579	PRKCB	0.238032	0.105692	2.25213	0.0243142	0.241115	16.3613	8.36933	0.212274	0.745336	0.553008	2.35174	-0.719536	3.03599	-0.324314	1.31043	0.145757	0.143223	1.0466	-0.267414	0.440453	-0.117543	0.22053	0.0382434	0.0670758	0.198055	0.138123	0.0210474	0.13136	0.0283211
192670	AGO4	0.298852	0.13272	2.25175	0.0243382	0.241115	49.2589	13.7955	0.0320057	2.11022	2.41784	3.01275	1.53128	1.40552	-0.643991	-0.379139	0.424238	0.63411	1.40368	0.279458	0.242568	-0.164511	-0.0865865	0.040417	0.0687821	0.217075	0.033306	0.0297847	0.0652575	0.0521559
56548	CHST7	0.358722	0.15931	2.25173	0.0243395	0.241115	55.3918	15.6922	0.015505	-0.305161	1.58535	0.207933	2.06853	2.36003	-0.488283	4.39244	-0.06812	0.463414	0.086837	0.558073	0.505541	-0.133547	0.93424	0.0498301	0.0854455	0.174406	0.072788	0.0458857	0.0748043	0.0452382
9520	NPEPPS	0.203463	0.0903762	2.25129	0.024367	0.241144	13.4838	8.09097	0.231514	0.83443	0.28165	2.07245	2.47588	0.635335	-0.61683	1.71253	0.151795	0.058861	0.908546	0.469544	0.0930247	-0.158637	0.329957	0.0330929	0.0436753	0.192187	0.0359661	0.0214383	0.0661421	0.0371227
55762	ZNF701	0.36543	0.162348	2.25091	0.0243914	0.241144	61.7719	18.3112	0.00549987	2.97312	-0.156992	1.64691	0.868302	1.38651	-0.618643	4.2002	0.683759	-0.0479136	0.708668	0.177257	0.289274	-0.126247	1.01653	0.0528908	0.093145	0.18516	0.0416741	0.0435283	0.0416451	0.0585728
137695	TMEM68	0.247929	0.110272	2.24834	0.0245544	0.242512	27.1808	9.61285	0.141931	1.47637	2.43221	1.02846	1.10363	1.8054	1.43099	-1.29099	0.389956	0.633018	0.434326	0.420019	0.261649	0.246869	-0.243198	0.0697652	0.0677375	0.178343	0.144841	0.0210035	0.0297618	0.0354876
7374	UNG	-0.34671	0.154243	-2.24781	0.0245882	0.242602	71.3975	24.4734	0.000427234	-1.49156	-1.82548	-3.31078	-4.66541	-0.341533	-0.850812	0.774526	-0.241969	-0.359641	-1.58348	-0.862815	-0.0590202	-0.162015	0.151007	0.026317	0.0388137	0.228751	0.0342024	0.029863	0.0362613	0.0380122
55824	PAG1	0.202501	0.0901194	2.24703	0.0246382	0.242851	0	6.49055	0.370535	0.78363	1.31621	1.45047	-0.168913	1.11898	-0.833628	2.39237	0.173569	0.357088	0.619801	-0.0428261	0.166105	-0.24454	0.473763	0.0490592	0.0736038	0.182594	0.0642824	0.0220354	0.0860505	0.0392163
10398	MYL9	-0.255383	0.113775	-2.24464	0.0247915	0.244084	0	2.36239	0.883539	-1.20322	-1.01647	-0.526424	-0.291945	-0.549777	-2.06217	-0.0521253	-0.371354	-0.335944	-0.220407	-0.0741218	-0.155421	-0.51503	-0.0186209	0.0952551	0.109231	0.175298	0.06446	0.0799189	0.0623762	0.127615
8273	SLC10A3	-0.410071	0.182723	-2.24422	0.0248183	0.244084	80.4281	35.7655	3.06149e-06	-2.56896	0.419653	-2.82445	-6.70597	-0.102998	0.0929353	-2.89816	-0.419543	0.0777049	-1.29679	-1.03761	-0.0171496	0.0245005	-0.516987	0.0266711	0.0342859	0.2108	0.0239412	0.0277239	0.0695005	0.031821
23643	LY96	0.335682	0.149596	2.24392	0.0248377	0.244084	44.1032	12.5231	0.0512666	2.90288	2.3196	2.06994	-1.27738	2.12251	0.962377	-0.179312	0.565298	0.638324	0.907333	-0.329301	0.385863	0.396046	-0.0579629	0.0379226	0.075728	0.192139	0.0664575	0.0330498	0.169356	0.104492
118788	PIK3AP1	0.230016	0.102751	2.23858	0.0251833	0.247234	0	5.55371	0.474989	1.44006	1.25378	2.2324	0.502968	1.28637	0.0775306	-0.147861	0.413677	0.49235	0.986845	0.170681	0.222931	0.0235165	-0.0347093	0.08252	0.154208	0.195413	0.115158	0.0300337	0.0920026	0.055104
2124	EVI2B	0.439233	0.196249	2.23814	0.0252119	0.247268	63.0484	18.9437	0.0042598	0.610167	2.27864	2.67132	2.76984	3.40568	-0.100557	-1.21618	0.180703	0.771853	1.21313	0.826287	0.614439	-0.0435767	-0.261007	0.0877071	0.114741	0.206236	0.0889926	0.0325499	0.187795	0.0460587
23019	CNOT1	0.155201	0.0693613	2.23757	0.025249	0.247385	0	3.63746	0.7256	0.28123	0.241385	-0.0195392	1.12807	1.77476	-0.447887	1.97067	0.0423027	0.0441519	-0.00815614	0.214537	0.23938	-0.133807	0.336916	0.0226263	0.0334562	0.174244	0.0361688	0.0181926	0.0892521	0.0292292
55250	ELP2	-0.196783	0.0879603	-2.23718	0.0252745	0.247389	12.8286	8.03016	0.235902	-1.02137	-3.13803	-0.413319	-1.59897	-0.746011	-0.596686	0.831425	-0.177289	-0.604418	-0.17285	-0.255828	-0.118321	-0.155233	0.174496	0.0301301	0.0370989	0.174892	0.0255983	0.0251556	0.0676826	0.0440481
148867	SLC30A7	-0.188907	0.0844609	-2.23662	0.0253112	0.247502	0	6.48507	0.371097	-0.21992	0.0704449	1.07734	-2.81422	-1.05035	-0.442093	-1.37659	-0.0420493	0.0173771	0.455492	-0.456034	-0.184875	-0.156782	-0.263144	0.0365586	0.0608493	0.178753	0.0262591	0.0309802	0.125766	0.0365408
55276	PGM2	0.231727	0.103685	2.2349	0.0254237	0.247883	13.0923	8.05452	0.234136	2.66701	1.50358	1.99721	0.813262	0.247656	-0.111717	0.351271	0.596234	0.430462	0.872365	0.160609	0.0423887	-0.029901	0.0777023	0.0499787	0.0819627	0.190786	0.0390015	0.0292956	0.0716359	0.0489309
7127	TNFAIP2	0.353564	0.158212	2.23475	0.0254335	0.247883	50.9005	14.2568	0.026896	1.05218	0.348083	2.9362	0.895803	1.73706	-0.989792	3.47239	0.268141	0.102625	1.35966	0.317832	0.286645	-0.285701	0.784773	0.0649458	0.0869244	0.214431	0.125883	0.0272308	0.0833171	0.0510776
100	ADA	-0.361684	0.161881	-2.23426	0.0254659	0.247883	58.5951	16.9062	0.0096342	-3.13001	-2.20935	-2.25247	-2.77098	1.22978	-0.849819	0.0416694	-0.671189	-0.533361	-0.996812	-0.639051	0.274105	-0.253834	0.00955733	0.045983	0.0582791	0.195843	0.0531867	0.0496799	0.0892169	0.0526065
22907	DHX30	-0.227666	0.101905	-2.23411	0.025476	0.247883	7.5814	7.57423	0.270984	-0.589078	-0.488241	-2.54545	-1.83154	0.416895	-0.987168	-1.41771	-0.12765	-0.12263	-1.14633	-0.440593	0.088972	-0.249855	-0.266279	0.0469561	0.0630851	0.202809	0.0578687	0.0455464	0.0640611	0.0352779
669	BPGM	-0.367226	0.164373	-2.2341	0.0254763	0.247883	44.0044	12.501	0.0516813	-1.31686	-0.640359	-1.51794	1.55292	-2.88196	-0.303364	-4.01752	-0.480487	-0.279303	-0.650113	0.520487	-0.415064	-0.140932	-0.820871	0.133133	0.190241	0.18343	0.112337	0.0207421	0.215819	0.0417477
57181	SLC39A10	-0.253796	0.113681	-2.23253	0.0255799	0.248646	21.8945	8.96223	0.175713	-0.185148	0.606029	-1.70416	-3.25826	-0.898697	-1.49386	-0.329259	-0.0511823	0.205682	-0.734934	-0.710396	-0.163381	-0.300217	-0.0731242	0.0764186	0.115188	0.185984	0.0475368	0.0330503	0.0403882	0.0493228
22885	ABLIM3	-0.228907	0.102568	-2.23176	0.0256311	0.248897	0	4.90029	0.556663	-0.62222	0.414486	-1.38037	0.579826	-0.480003	-1.82376	-1.87722	-0.193542	0.136816	-0.588517	0.20683	-0.11294	-0.374957	-0.415009	0.0967529	0.108956	0.181772	0.127243	0.0553618	0.0422697	0.0488749
4200	ME2	0.229339	0.102818	2.23054	0.0257115	0.249432	13.9987	8.13941	0.228067	2.38647	1.74659	1.28512	-0.223074	2.22413	-0.27182	-0.065345	0.526241	0.509969	0.546334	-0.0445026	0.344411	-0.08245	-0.013646	0.0486247	0.0852524	0.180731	0.0397991	0.0239792	0.0920063	0.0436099
8065	CUL5	-0.298673	0.133943	-2.22984	0.0257579	0.249636	54.2922	15.3147	0.0179454	-0.297438	0.433691	-1.69518	-5.0215	-0.499312	-0.905649	-2.05027	-0.0673915	0.108095	-0.730804	-0.71486	-0.0819525	-0.242404	-0.457205	0.0513355	0.0621221	0.185853	0.0202663	0.0269389	0.0716405	0.0497281
3759	KCNJ2	0.399345	0.179156	2.22904	0.0258113	0.249907	53.4874	15.0497	0.0198738	-0.10203	1.37875	3.88802	1.31715	0.854942	-0.151854	2.30784	-0.0279826	0.506973	1.98072	0.411962	0.178728	-0.0510034	0.526402	0.075218	0.135207	0.25953	0.0978233	0.0437029	0.112809	0.0520267
55031	USP47	-0.197667	0.0887261	-2.22783	0.0258917	0.250439	11.6587	7.92381	0.243739	0.568984	-0.0688097	-1.96694	-1.58687	-0.839301	-0.952918	-2.50167	0.127418	-0.021812	-0.857917	-0.224995	-0.108363	-0.192536	-0.579636	0.0501486	0.100483	0.190243	0.020103	0.0166698	0.0408235	0.0536847
80063	ATF7IP2	-0.268839	0.12072	-2.22697	0.0259494	0.250751	31.1607	10.1686	0.117729	-0.723459	-2.02702	-1.45284	1.61348	-1.88565	-1.18749	-2.17826	-0.162713	-0.515832	-0.620863	0.402315	-0.366506	-0.299004	-0.458877	0.0505842	0.0647593	0.182622	0.0621733	0.0377782	0.0634003	0.0443785
4534	MTM1	0.204038	0.0916563	2.22612	0.026006	0.251011	0	3.34611	0.764319	2.29911	0.343733	1.07746	0.329303	0.657271	0.0503035	1.0926	0.510371	0.102498	0.455541	0.0858551	0.123247	0.0127578	0.226824	0.0492779	0.0889179	0.178754	0.0679737	0.0351614	0.0643218	0.0430982
56674	TMEM9B	-0.184051	0.0827716	-2.2236	0.0261753	0.25219	0	2.7377	0.840974	-0.458852	-0.562435	-1.17768	-2.16075	-0.619806	-0.311467	-0.78632	-0.0884107	-0.109579	-0.499173	-0.443238	-0.119031	-0.109234	-0.148322	0.0371249	0.0379583	0.179659	0.042079	0.0368816	0.122997	0.0355806
65094	JMJD4	-0.279982	0.126095	-2.22041	0.026391	0.253115	42.8564	12.2498	0.0566218	-0.909017	0.19374	-0.937298	-3.89055	0.705812	-1.45333	-2.2119	-0.265743	0.0606156	-0.395041	-0.708552	0.136026	-0.247375	-0.465395	0.0854636	0.0978881	0.177635	0.0331681	0.0371422	0.0289723	0.0442705
79887	PLBD1	0.412563	0.185929	2.21893	0.0264915	0.253115	57.144	16.3338	0.0120702	3.52273	1.71425	3.64504	-0.586828	1.04783	0.271569	0.315148	0.763138	0.464742	1.80424	-0.211003	0.211251	0.127065	0.0861872	0.0469298	0.0734975	0.245009	0.129287	0.0406457	0.218924	0.0747924
163126	EID2	-0.198965	0.0896688	-2.21889	0.0264945	0.253115	0	5.86299	0.438712	-0.683859	-1.18549	-0.123715	-2.96962	-0.00986959	-0.119524	-0.255125	-0.190454	-0.368753	-0.0516503	-0.537522	-0.00210417	-0.0256172	-0.0555235	0.0775619	0.0967555	0.1743	0.0327636	0.0454533	0.0459359	0.047364
79624	ARMT1	0.19785	0.0891685	2.21883	0.0264984	0.253115	0	3.8586	0.695804	1.79574	1.57975	0.146984	0.745977	1.50178	0.476847	0.0270355	0.56137	0.59283	0.0613689	0.141107	0.284634	0.0875207	0.00651336	0.0977266	0.140827	0.174324	0.0357804	0.0359223	0.0336871	0.0580421
637	BID	0.342797	0.154547	2.21808	0.0265494	0.253115	59.286	17.1931	0.00859914	-0.246846	2.83064	3.47796	0.645385	2.19718	-0.69707	2.002	-0.0517687	0.572292	1.69105	0.179911	0.458727	-0.180306	0.384332	0.0439827	0.0408757	0.236409	0.07771	0.0435891	0.0669065	0.0368542
221908	PPP1R35	-0.255082	0.115025	-2.21762	0.0265807	0.253115	37.8552	11.264	0.0805514	-1.63847	-1.75892	-1.14575	-4.10216	0.327282	-0.170003	0.166325	-0.343802	-0.392604	-0.485235	-0.592161	0.0673862	-0.051704	0.0322015	0.044029	0.0498215	0.179361	0.020838	0.0423934	0.0924988	0.037483
6533	SLC6A6	0.33675	0.151853	2.21761	0.0265817	0.253115	55.1043	15.5917	0.0161216	-0.292942	0.824947	3.24112	3.81065	0.717687	1.03921	0.435151	-0.0770677	0.23059	1.54016	0.749148	0.15414	0.236544	0.0931012	0.0692121	0.0781318	0.22581	0.0386488	0.0461278	0.0518099	0.0457751
8027	STAM	-0.19895	0.0897169	-2.21753	0.0265867	0.253115	0	5.62319	0.466694	0.465905	-0.208118	-0.65698	-2.52064	-0.0170994	-0.526795	-1.79366	0.112882	-0.0597742	-0.275534	-0.404035	-0.00358542	-0.138673	-0.491878	0.0587024	0.0824911	0.175893	0.0256931	0.0439661	0.0692946	0.0752033
3784	KCNQ1	0.181447	0.0818381	2.21715	0.0266131	0.253115	0	4.3942	0.623492	1.83026	-0.212499	1.58195	-0.365334	1.40447	0.804048	0.812321	0.369927	-0.0492284	0.679072	-0.113811	0.262946	0.131304	0.164316	0.0408512	0.0536684	0.184267	0.0970482	0.0350516	0.0266681	0.0409169
10025	MED16	-0.29697	0.133974	-2.21662	0.0266493	0.253115	52.9655	14.8827	0.021189	-0.371232	-1.60884	-2.22525	-2.61299	0.48424	0.141276	-3.10165	-0.073997	-0.359505	-0.983305	-0.422079	0.0753323	0.0416775	-0.815268	0.0397316	0.0499329	0.195262	0.0260923	0.0242014	0.0870299	0.06909
64215	DNAJC1	0.403954	0.182275	2.21617	0.0266797	0.253115	75.5578	28.6389	7.11932e-05	0.867391	1.75427	-1.19187	6.73639	2.03844	0.848981	2.43495	0.231781	0.491138	-0.505378	1.24384	0.300253	0.145945	0.560001	0.0714045	0.0783817	0.179795	0.0340936	0.021696	0.0295516	0.052893
8857	FCGBP	-0.294394	0.132973	-2.21393	0.0268337	0.254115	23.4847	9.1485	0.165397	-1.49131	-1.1308	-1.18818	-2.98563	0.463958	-0.0181292	-1.33105	-0.389604	-0.289719	-0.503764	-1.17433	0.112577	-0.00525124	-0.303663	0.0682512	0.0656426	0.179759	0.154707	0.0588766	0.0839007	0.0520469
57215	THAP11	-0.363612	0.164245	-2.21384	0.0268401	0.254115	71.3797	24.4581	0.000430017	-2.47074	-2.554	-2.33181	-4.77198	1.02426	-0.41973	-0.102954	-0.465102	-0.465729	-1.03654	-0.887947	0.174496	-0.128953	-0.0195393	0.0354358	0.0332527	0.197599	0.034624	0.0290236	0.0943897	0.0360188
79085	SLC25A23	-0.273444	0.123583	-2.21264	0.0269225	0.254262	45.3074	12.7988	0.0463444	-2.58275	0.948328	-2.85146	-2.03891	-0.795731	-0.111282	-1.64628	-0.469016	0.204437	-1.31184	-0.350127	-0.15742	-0.0286336	-0.374703	0.0329768	0.0464729	0.211654	0.0294887	0.039137	0.0662071	0.0518041
153090	DAB2IP	-0.194948	0.0881363	-2.21189	0.026974	0.254262	18.1127	8.54834	0.200618	-0.842433	-3.3804	-1.13001	0.397631	-0.746615	0.00272998	-1.39139	-0.143583	-0.525205	-0.47838	0.0947608	-0.137809	0.000409947	-0.295837	0.0290491	0.0241391	0.179217	0.0567934	0.0340694	0.0225495	0.045207
23078	VWA8	0.189901	0.0858954	2.21084	0.0270467	0.254262	0	5.9966	0.423571	2.15459	1.88058	0.0634848	1.0257	-0.498145	1.08713	0.468513	0.562569	0.529347	0.0265012	0.209155	-0.0954335	0.190723	0.108275	0.0681748	0.0792315	0.174258	0.0415813	0.036702	0.0307781	0.0534093
3609	ILF3	-0.284011	0.128491	-2.21036	0.0270801	0.254262	56.595	16.1272	0.0130875	-1.57701	-1.7952	-2.24239	-3.97863	-0.624512	-0.558949	0.896765	-0.306511	-0.589991	-0.991801	-0.570742	-0.080906	-0.148876	0.159184	0.0377764	0.108011	0.195627	0.0205785	0.0167834	0.0709426	0.0315093
5330	PLCB2	0.206549	0.0934461	2.21036	0.0270805	0.254262	0	5.26374	0.510458	-0.0929851	0.799479	0.56033	-0.02143	1.12411	0.0191279	2.81481	-0.0242748	0.213761	0.234697	-0.0053747	0.193769	0.00650461	0.600695	0.0681529	0.0714895	0.17544	0.0629022	0.0297134	0.11564	0.0455416
144165	PRICKLE1	-0.301848	0.136563	-2.21032	0.0270828	0.254262	38.6285	11.406	0.0766116	-0.274609	0.228159	-1.8854	-3.8764	-1.34151	-0.860208	-0.224042	-0.0818846	0.0750937	-0.819302	-0.8976	-0.234948	-0.228977	-0.0496736	0.0889146	0.108326	0.188835	0.0536178	0.0306731	0.0708561	0.0491578
51380	CSAD	0.235672	0.106629	2.21021	0.0270903	0.254262	21.0686	8.86846	0.181112	0.89044	1.91675	1.87891	-0.40497	2.12132	-0.661128	1.73363	0.180902	0.507377	0.816249	-0.0779374	0.383983	-0.184056	0.36082	0.0412743	0.07007	0.188726	0.037038	0.0327652	0.0775047	0.0433179
328	APEX1	-0.323888	0.14656	-2.20994	0.0271092	0.254262	58.3246	16.7965	0.010061	-2.3784	-1.90281	-1.57539	-4.34106	-0.257842	-0.313959	0.828931	-0.432278	-0.491529	-0.676097	-0.811598	-0.0433109	-0.103677	0.18195	0.0330337	0.0667278	0.18418	0.0349535	0.0282154	0.109048	0.04818
53347	UBASH3A	-0.275076	0.124476	-2.20987	0.027114	0.254262	32.4124	10.3569	0.110403	-3.25137	-1.22973	-1.87896	0.87343	-0.218524	-1.00385	-1.20788	-0.716611	-0.31908	-0.816274	0.230066	-0.0492276	-0.214168	-0.277472	0.0485773	0.0673258	0.188727	0.069382	0.0507478	0.0455167	0.0527708
1355	COX15	0.158837	0.0719184	2.20858	0.0272038	0.254861	0	4.7845	0.571735	-0.257454	2.09398	1.28426	0.793399	1.21847	-0.293008	1.16702	-0.0547121	0.438111	0.545958	0.156467	0.145743	-0.0644655	0.226482	0.0451614	0.0437746	0.180722	0.0388924	0.0143069	0.0484056	0.0376624
944	TNFSF8	0.228275	0.103448	2.20666	0.0273381	0.255875	0	2.8089	0.832422	0.515591	-0.732831	1.00544	0.42729	0.899951	1.92755	1.0754	0.152185	-0.282846	0.424385	0.144622	0.188847	0.384709	0.297155	0.087123	0.148968	0.178158	0.114557	0.0440336	0.0398338	0.0763533
199675	MCEMP1	0.339523	0.153974	2.20507	0.0274493	0.256672	18.7948	8.62014	0.196095	2.61414	0.0793245	2.27296	1.44566	0.700747	0.928323	-0.675326	0.631682	0.0259708	1.00702	0.765941	0.171252	0.41397	-0.228104	0.0583902	0.10719	0.196288	0.280709	0.0597238	0.198857	0.114088
23313	KIAA0930	0.165341	0.0750456	2.20321	0.0275802	0.257131	0	4.31877	0.633623	0.249904	-0.124185	1.56949	-0.019636	1.57438	0.93742	1.80939	0.044536	-0.0264656	0.673421	-0.00521804	0.227954	0.160383	0.380598	0.0317596	0.0454175	0.184101	0.0706171	0.020964	0.0292717	0.0442454
3937	LCP2	0.19832	0.0900401	2.20257	0.0276249	0.257131	0	5.97378	0.426133	0.249194	-0.361202	2.5624	0.674739	1.27298	0.420751	1.34679	0.0605406	-0.120558	1.15523	0.210538	0.228956	0.100665	0.23147	0.0590228	0.111403	0.203254	0.0973624	0.0323491	0.0572411	0.0295384
6873	TAF2	-0.30942	0.140489	-2.20245	0.0276336	0.257131	50.2617	14.0737	0.0288241	0.246039	-0.116861	-0.967152	-2.96663	-0.783497	-0.286457	-4.24267	0.0646065	-0.0396601	-0.40788	-0.658428	-0.136068	-0.064079	-0.798853	0.0689515	0.115177	0.177859	0.0492596	0.0301605	0.0500395	0.0354532
92345	NAF1	-0.195222	0.0886439	-2.20231	0.0276433	0.257131	0	2.2773	0.892512	-0.755757	-0.324838	-1.11489	-1.53536	-1.4108	-0.927365	-0.0109717	-0.196593	-0.0928996	-0.4718	-0.430071	-0.259659	-0.173081	-0.00225371	0.0676662	0.0817886	0.179081	0.0784626	0.0338747	0.0348334	0.0421936
57035	RSRP1	0.326123	0.148094	2.20214	0.0276553	0.257131	50.8415	14.2396	0.0270708	1.04448	1.07112	1.40108	4.36517	0.38198	-0.535848	1.28555	0.259089	0.395741	0.597735	0.9558	0.0606027	-0.158754	0.275259	0.0615316	0.136505	0.18201	0.0479438	0.0251711	0.0877738	0.0458464
3665	IRF7	0.209294	0.0950714	2.20144	0.027705	0.257314	0	3.37445	0.760592	0.48136	2.04058	0.95804	-0.307468	1.41344	0.222974	0.874772	0.118866	0.490859	0.403959	-0.0830563	0.321918	0.0721539	0.163007	0.060978	0.0578639	0.17779	0.07297	0.0518725	0.104716	0.0347233
51253	MRPL37	-0.326086	0.148145	-2.20112	0.0277272	0.257314	58.7183	16.9567	0.00944387	-1.20021	-0.847849	-2.55293	-5.38419	0.0174804	0.057092	-0.741664	-0.263587	-0.189554	-1.15025	-0.77347	0.00411067	0.0175639	-0.153875	0.0482322	0.049984	0.203005	0.020637	0.0552995	0.0946432	0.0430452
7988	ZNF212	-0.463484	0.210617	-2.2006	0.0277643	0.257415	83.749	43.0742	1.12765e-07	-1.1726	-2.96368	0.0989938	-9.3202	-1.34466	-1.10707	-1.47429	-0.222974	-0.695435	0.0413267	-1.37457	-0.234356	-0.279924	-0.273625	0.0361586	0.0550618	0.17428	0.0217512	0.0303756	0.0639344	0.0344464
10857	PGRMC1	-0.426672	0.194247	-2.19655	0.0280527	0.259255	74.5186	27.471	0.000118151	-1.72172	0.498684	-0.0794641	-7.66574	-1.26822	-1.38877	-2.40755	-0.386433	0.133002	-0.0331725	-1.16396	-0.244432	-0.495532	-0.55708	0.0503757	0.0711324	0.174266	0.0230552	0.0371473	0.127317	0.0535406
55432	YOD1	-0.296536	0.135011	-2.19638	0.0280648	0.259255	45.019	12.7317	0.0475006	-1.67439	-0.196683	-2.04892	0.616846	-1.27827	-0.478779	-3.62635	-0.326292	-0.04126	-0.897187	0.169204	-0.178907	-0.218687	-0.895161	0.0379751	0.0440074	0.191741	0.0752434	0.0195891	0.20863	0.0609346
10673	TNFSF13B	0.324486	0.14774	2.19633	0.0280682	0.259255	46.0132	12.9661	0.0435768	0.769121	2.26158	3.60745	-0.0614817	1.23259	0.305758	0.83602	0.176613	0.637187	1.77823	-0.0148958	0.217349	0.124676	0.186197	0.0527298	0.0793798	0.242984	0.0586997	0.0310939	0.166268	0.0496035
28511	NKIRAS2	-0.241669	0.110084	-2.19532	0.0281408	0.259548	47.4151	13.3118	0.0383431	-1.18913	-1.37299	-2.07036	-3.87625	-0.119643	0.197228	-0.550139	-0.223102	-0.242903	-0.907535	-0.697373	-0.019574	0.0390444	-0.0921644	0.0352007	0.0312988	0.192147	0.0323674	0.026766	0.0391905	0.0280661
8482	SEMA7A	-0.205686	0.0937001	-2.19515	0.0281527	0.259548	0	4.97517	0.547001	-1.30437	-1.17315	-1.56293	-0.151868	-1.15515	0.279052	-1.68468	-0.381036	-0.368426	-0.670447	-0.0393066	-0.216412	0.0517751	-0.448042	0.0853354	0.0986265	0.184014	0.066988	0.035098	0.0344247	0.07073
9429	ABCG2	-0.251073	0.114398	-2.19473	0.0281829	0.259583	14.687	8.20508	0.22346	-2.41545	-0.224141	-1.91715	-1.05212	-0.669768	0.378198	-1.55093	-0.535547	-0.0573747	-0.83429	-0.33106	-0.164247	0.0634684	-0.499813	0.0491587	0.0655238	0.189374	0.0990102	0.0601377	0.0281629	0.103856
708	C1QBP	-0.215428	0.0981807	-2.1942	0.0282209	0.259594	13.1511	8.05998	0.233742	-2.0907	-1.49575	-2.59229	-0.353819	-0.182916	-0.232521	-0.634646	-0.419967	-0.341755	-1.17099	-0.0584166	-0.0326955	-0.0728121	-0.138596	0.0403503	0.0522054	0.204051	0.027259	0.0319502	0.0980582	0.0476913
307	ANXA4	0.198122	0.0903026	2.19398	0.0282369	0.259594	0	2.28841	0.891356	1.11746	1.29533	0.266863	0.541192	0.409718	1.89639	0.216981	0.358361	0.443028	0.111481	0.115739	0.0753492	0.333249	0.0563761	0.102843	0.116977	0.174513	0.0457361	0.033821	0.0308804	0.0675066
84532	ACSS1	-0.221187	0.100851	-2.19322	0.0282917	0.259856	4.23619	7.30965	0.293158	-0.825916	-2.67584	-1.9394	-0.976153	-0.49984	-0.21905	0.120833	-0.187084	-0.645817	-0.844826	-0.239887	-0.0830023	-0.0654748	0.0276072	0.0513097	0.0582504	0.189758	0.0603919	0.0275752	0.0893433	0.0521999
1192	CLIC1	0.164375	0.0750483	2.19026	0.0285057	0.261333	0	5.95767	0.427949	0.973148	1.55316	2.26893	-0.0721493	1.46212	0.236513	0.220433	0.160737	0.28328	1.00501	-0.0116118	0.255785	0.0994708	0.0410747	0.0272817	0.0332659	0.1962	0.0259019	0.0306042	0.176881	0.0347214
84923	FAM104A	-0.35131	0.160501	-2.18883	0.0286092	0.261783	44.4796	12.608	0.0497011	-1.16555	-0.14314	-2.06825	0.95738	-1.53881	-0.445633	-4.10588	-0.274989	-0.0418359	-0.906514	0.435059	-0.290353	-0.180682	-0.935458	0.055663	0.0854236	0.192107	0.206504	0.0356026	0.164389	0.0519081
7850	IL1R2	0.371096	0.169562	2.18855	0.0286295	0.261783	40.1502	11.6959	0.0691061	0.450685	1.16684	1.89642	3.57618	0.87297	0.571872	-0.320489	0.132209	0.432096	0.824499	1.36238	0.233558	0.14422	-0.101461	0.0860555	0.137132	0.189021	0.145131	0.0715799	0.0635989	0.100223
66005	CHID1	-0.386853	0.176768	-2.18848	0.0286346	0.261783	72.001	25.0009	0.000341322	-0.331051	0.433737	-1.65019	-4.46456	-0.890391	-0.326688	-4.43262	-0.0799815	0.106373	-0.710169	-0.956705	-0.169861	-0.0574926	-0.960245	0.0583699	0.0601463	0.185206	0.0459197	0.0363937	0.0309712	0.0469291
56919	DHX33	-0.190991	0.0873602	-2.18625	0.0287976	0.262785	0	5.52341	0.478632	0.0346205	-2.77556	-0.517191	-0.666968	-1.11383	-0.801768	0.0484421	0.00756812	-0.622574	-0.216518	-0.161002	-0.214647	-0.196693	0.00992571	0.0477869	0.0503129	0.175262	0.0582711	0.0371373	0.0601838	0.0419833
1298	COL9A2	-0.197004	0.0901331	-2.1857	0.0288376	0.262906	0	6.20578	0.400538	-0.902403	-0.63927	0.904528	-2.89425	-0.34524	-0.418987	-0.730989	-0.27566	-0.218021	0.380975	-0.548192	-0.0624243	-0.0992636	-0.139528	0.0933143	0.116313	0.177398	0.0358752	0.0326937	0.0561278	0.0364337
8859	STK19	-0.16033	0.0734146	-2.18389	0.02897	0.263868	0	3.57967	0.733341	-1.04477	-0.945106	0.118246	-1.47536	0.463	-0.757086	-1.84013	-0.173085	-0.196266	0.0493661	-0.232709	0.0755829	-0.202997	-0.34439	0.0274458	0.0431248	0.174295	0.0248791	0.0266493	0.0718937	0.035027
23424	TDRD7	0.353315	0.161868	2.18274	0.0290549	0.264397	66.4412	20.8589	0.00194483	4.25897	2.36667	2.49677	-1.02599	1.08182	-0.433584	2.05389	0.793761	0.533638	1.12093	-0.197852	0.195303	-0.127823	0.446433	0.0347352	0.0508414	0.201557	0.0371871	0.0325919	0.0869105	0.0472452
8736	MYOM1	-0.225905	0.103526	-2.1821	0.029102	0.264581	10.0913	7.78567	0.25423	0.38342	-1.58059	0.88998	0.117479	-1.86765	-1.16058	-2.62822	0.106716	-0.453603	0.374739	0.0271844	-0.319729	-0.273826	-0.516243	0.0774656	0.08236	0.177295	0.0535448	0.0293069	0.0556672	0.0385821
79414	LRFN3	-0.286521	0.131328	-2.18173	0.0291295	0.264587	50.9045	14.2579	0.0268839	-1.49695	0.356179	-2.05764	-3.49633	-2.7162	-0.734676	0.841262	-0.399109	0.0867724	-0.901393	-0.605357	-0.477853	-0.143034	0.182904	0.0710837	0.0593506	0.191906	0.0299776	0.0309503	0.0379041	0.0472697
85019	TMEM241	-0.323197	0.148193	-2.18091	0.0291901	0.264892	55.8732	15.8634	0.0145063	-0.324378	-0.252858	-0.857199	-3.30018	0.542266	-1.13478	-4.2535	-0.101566	-0.0852915	-0.360708	-0.665246	0.0993826	-0.220961	-0.800433	0.0980376	0.113778	0.177071	0.0406341	0.0335889	0.0379148	0.0354126
5873	RAB27A	0.282876	0.129758	2.18003	0.0292553	0.265175	36.0772	10.9507	0.0899119	2.59845	0.427041	2.89539	1.75705	0.821358	0.228988	-0.483648	0.582461	0.116058	1.33651	0.374284	0.150875	0.0621043	-0.135213	0.0502464	0.0738602	0.213074	0.045377	0.0337417	0.0735559	0.078159
5321	PLA2G4A	0.206615	0.0948063	2.17934	0.0293064	0.265175	0	6.69179	0.350293	1.71961	1.75492	0.80769	0.452183	-1.03988	1.92778	0.636127	0.449649	0.471462	0.339565	0.105882	-0.222331	0.324907	0.151576	0.0683738	0.0721736	0.176749	0.0548292	0.0457127	0.0284055	0.0567774
3577	CXCR1	0.418635	0.19214	2.1788	0.0293463	0.265175	55.6298	15.7764	0.015006	1.51769	0.397398	4.1783	0.802582	1.97737	0.333174	0.148386	0.350886	0.123299	2.21419	0.401378	0.483812	0.136831	0.0310168	0.0534521	0.0962651	0.280821	0.250108	0.0598653	0.168665	0.0436927
1019	CDK4	-0.266732	0.122429	-2.17867	0.029356	0.265175	46.8436	13.1687	0.0404341	-1.66224	-0.0460551	-3.71749	-1.74788	-0.320949	-0.431898	-1.38514	-0.340069	-0.00970205	-1.85528	-0.297182	-0.0595002	-0.117287	-0.245266	0.041855	0.0443785	0.24907	0.0289082	0.0343688	0.0737454	0.0313536
79102	RNF26	-0.442903	0.203334	-2.1782	0.0293912	0.265192	80.1891	35.334	3.7126e-06	-0.77035	-1.29525	-2.70958	-7.47903	-0.196844	0.595427	-2.70875	-0.195406	-0.349624	-1.23378	-1.038	-0.0326077	0.135632	-0.612308	0.0643427	0.0728605	0.207334	0.019262	0.0274406	0.0518879	0.0510979
25842	ASF1A	-0.249821	0.114706	-2.17792	0.0294119	0.265192	15.9635	8.32971	0.214929	0.549267	-0.489721	-0.935711	-2.88548	-1.09344	-0.0439606	-2.01175	0.129297	-0.150141	-0.394359	-0.781873	-0.197799	-0.0120689	-0.456014	0.0554126	0.0939946	0.177623	0.0734237	0.0327233	0.075372	0.0513818
84961	FBXL20	-0.184385	0.0846841	-2.17732	0.0294564	0.265203	0	2.52467	0.865696	-0.518342	-0.487289	0.150901	-2.3063	-0.236387	-0.747197	-0.896278	-0.13007	-0.143264	0.0630051	-0.384323	-0.0418053	-0.167093	-0.209655	0.062968	0.0864374	0.174329	0.0277691	0.0312763	0.0500091	0.0547172
1154	CISH	-0.198033	0.0909585	-2.17718	0.029467	0.265203	0	2.86736	0.825301	-0.739684	-0.0235246	-1.10656	-1.69421	-1.62788	-0.533893	0.173027	-0.188854	-0.00908163	-0.468176	-0.396585	-0.268571	-0.136583	0.0361078	0.0651866	0.149033	0.179007	0.0547946	0.0272189	0.0654461	0.0435485
3691	ITGB4	-0.221293	0.101676	-2.17646	0.0295206	0.265383	32.9954	10.447	0.107045	-3.38665	-0.920903	-0.918844	1.5549	-2.00372	0.0521945	-1.81502	-0.468763	-0.162868	-0.387116	0.487169	-0.31474	0.0108551	-0.366056	0.0191587	0.0312784	0.1775	0.0981641	0.0246734	0.043253	0.0406753
6947	TCN1	0.370325	0.170171	2.17619	0.029541	0.265383	9.6972	7.7517	0.256865	1.41709	0.183279	3.10168	1.14906	0.228788	0.235748	0.554955	0.501787	0.0778199	1.45588	0.534951	0.0627981	0.108642	0.232187	0.125385	0.180284	0.22032	0.216743	0.0753405	0.212373	0.175049
10390	CEPT1	-0.210045	0.0965357	-2.17583	0.0295683	0.265386	18.0414	8.54089	0.201091	-0.563287	1.31826	-0.824696	-2.12406	-1.33396	-0.859794	-2.50156	-0.121666	0.286414	-0.346821	-0.446978	-0.190631	-0.232629	-0.446467	0.0466527	0.0472052	0.176857	0.0442832	0.0204222	0.0732048	0.0318536
1069	CETN2	-0.418309	0.192369	-2.17451	0.0296665	0.266025	74.929	27.9207	9.72513e-05	-1.64961	0.647139	-2.36693	-5.8506	-1.02427	0.0479974	-1.91455	-0.302932	0.121226	-1.0543	-1.18226	-0.189589	0.0171496	-0.510276	0.0337233	0.0350911	0.198407	0.0408345	0.0342607	0.127666	0.0710356
132299	OCIAD2	-0.283389	0.130483	-2.17185	0.029867	0.267356	32.0202	10.2972	0.112682	-3.11625	-1.97743	-2.05049	-0.333741	-0.205597	-0.394848	0.29207	-0.661761	-0.513076	-0.897942	-0.0999811	-0.0405128	-0.123598	0.0689141	0.0450959	0.067323	0.191771	0.089746	0.0388283	0.0979855	0.0556729
10713	USP39	-0.179908	0.0828374	-2.17182	0.0298693	0.267356	21.1665	8.87948	0.180471	-1.74912	-3.14524	-0.616072	-1.17212	0.50756	-0.458653	-0.455229	-0.278567	-0.534023	-0.258231	-0.16265	0.0627054	-0.132554	-0.084543	0.0253642	0.0288279	0.175692	0.019256	0.0152628	0.0835249	0.0344902
3613	IMPA2	0.209608	0.0966462	2.16882	0.0300964	0.268899	0	4.19291	0.650589	0.276588	1.44531	2.12912	0.67529	1.25136	0.136902	0.396819	0.0563881	0.389736	0.936063	0.19237	0.241836	0.0503018	0.0946673	0.0415632	0.0727141	0.193291	0.0811509	0.0373488	0.135005	0.0569134
6916	TBXAS1	0.333139	0.153715	2.16725	0.0302159	0.269722	58.4153	16.8331	0.00991647	-1.107	1.08758	3.05385	2.74727	1.90235	-0.0102218	1.83858	-0.200114	0.24842	1.42766	0.73546	0.305256	-0.00386491	0.394931	0.032678	0.0521732	0.218551	0.0716664	0.0257481	0.142963	0.0461398
4317	MMP8	0.307445	0.141889	2.1668	0.0302499	0.269781	0	6.18772	0.402494	1.25576	0.114726	2.83219	0.708114	0.15801	0.754831	0.526289	0.539054	0.0570158	1.30109	0.258679	0.0463563	0.212304	0.222479	0.184267	0.246982	0.211043	0.133449	0.0860696	0.0791075	0.178702
7251	TSG101	-0.296055	0.136666	-2.16627	0.0302909	0.269902	56.5454	16.1088	0.013182	-0.48276	0.0156046	-2.2865	-3.06562	0.127242	-0.18687	-3.74335	-0.0801309	0.00294562	-1.01379	-0.461713	0.0268045	-0.0740908	-0.78839	0.027551	0.0356327	0.196585	0.0226833	0.0443767	0.157199	0.044357
27043	PELP1	-0.326164	0.150612	-2.16559	0.0303427	0.270119	62.7212	18.7774	0.00455648	-0.302917	0.376346	-1.79866	-6.17921	-1.83134	-0.677199	-0.803171	-0.0841097	0.120344	-0.778685	-0.865974	-0.291967	-0.170394	-0.151376	0.0770985	0.102252	0.187424	0.0196401	0.0254173	0.0633107	0.035522
5763	PTMS	0.354605	0.163775	2.1652	0.0303724	0.270138	49.8984	13.9716	0.0299548	-0.247943	-0.922624	2.24042	2.72397	1.04402	0.435898	3.817	-0.0891203	-0.32806	0.990825	0.663798	0.225452	0.126679	0.777313	0.129196	0.126432	0.195584	0.0593836	0.0466328	0.0844576	0.0414712
126375	ZNF792	-0.232778	0.10754	-2.16457	0.0304205	0.270322	26.8588	9.57053	0.143942	0.0210993	-2.75259	-0.969248	-2.63155	-1.28889	0.216691	0.0423747	0.00443603	-0.589803	-0.408783	-0.596354	-0.217772	0.0482973	0.00946112	0.0442034	0.0459125	0.177875	0.0513553	0.0285478	0.049678	0.0498509
5004	ORM1	0.261908	0.121058	2.16349	0.0305038	0.270818	0	6.39439	0.380489	0.0154156	-0.338125	1.73196	2.60339	1.1614	0.250657	0.384994	0.0044514	-0.134973	0.747753	0.750565	0.26546	0.118363	0.100761	0.0833819	0.159346	0.186398	0.0831187	0.0522433	0.222984	0.0684974
348093	RBPMS2	-0.241216	0.111563	-2.16215	0.0306064	0.271326	0	3.7256	0.713752	-0.310642	-1.84459	-1.12059	0.15733	-0.71561	-1.69817	-0.4745	-0.104087	-0.658447	-0.474277	0.0429657	-0.198788	-0.427241	-0.119216	0.112271	0.127421	0.179132	0.0745792	0.0771661	0.0632969	0.0631242
126364	LRRC25	0.288264	0.133331	2.16202	0.0306163	0.271326	26.4557	9.51807	0.146469	0.639551	0.30717	3.48833	1.07881	1.42861	0.379488	0.660622	0.174262	0.0990953	1.6979	0.340966	0.230418	0.115083	0.17159	0.074243	0.104075	0.236913	0.0998923	0.0260139	0.0919662	0.0674647
2793	GNGT2	-0.265405	0.122862	-2.16018	0.0307586	0.272097	28.9497	9.85218	0.131017	-0.288941	-2.59417	-0.855943	-0.67108	-1.68958	1.01803	-2.36039	-0.0667637	-0.69162	-0.360171	-0.241204	-0.325102	0.217792	-0.516084	0.0533903	0.0710787	0.177062	0.129187	0.037024	0.0457678	0.0478052
117178	SSX2IP	-0.318604	0.147536	-2.1595	0.0308117	0.272147	52.967	14.8832	0.0211852	0.866281	-0.75496	-2.32096	-3.5413	-1.73346	-0.0279496	-1.54156	0.234277	-0.236891	-1.03107	-0.857808	-0.319454	-0.00485387	-0.371446	0.0731379	0.0984579	0.197354	0.0586753	0.0339617	0.0301596	0.0580587
4791	NFKB2	0.238709	0.110544	2.1594	0.0308195	0.272147	20.1755	8.76924	0.186978	-0.751556	0.901927	0.442102	1.71574	2.2476	-0.518369	2.70095	-0.181551	0.214402	0.184937	0.496143	0.418095	-0.133279	0.493256	0.0583549	0.0565089	0.174986	0.0836199	0.034603	0.066107	0.0333513
9200	HACD1	-0.217985	0.100983	-2.15864	0.0308783	0.272421	0	3.49727	0.744333	-0.185601	-0.590012	-0.677752	-2.05756	-1.7166	0.273961	-0.244401	-0.0596566	-0.189975	-0.284333	-0.448945	-0.374808	0.0763203	-0.0573037	0.103314	0.103675	0.176	0.047608	0.0476738	0.077607	0.0549745
79660	PPP1R3B	0.230806	0.106942	2.15823	0.0309101	0.272458	26.6824	9.5475	0.145047	1.8954	-0.740587	2.60256	1.53649	1.30807	1.3605	-0.165673	0.422577	-0.183912	1.17643	0.305985	0.249903	0.241659	-0.0361891	0.0497064	0.0616691	0.204329	0.0396587	0.0364989	0.0315509	0.0477146
57658	CALCOCO1	-0.195822	0.0907586	-2.15762	0.0309574	0.27249	0	5.16661	0.522629	-2.22636	-0.478601	-1.46687	-0.735125	0.168328	-0.428282	-1.31618	-0.548762	-0.114531	-0.62715	-0.166283	0.0299752	-0.113958	-0.321066	0.0607546	0.0572657	0.182793	0.051165	0.031711	0.0707995	0.0595055
81554	RCC1L	0.178215	0.082604	2.15747	0.0309692	0.27249	0	6.90279	0.329931	1.83678	-0.268908	-1.44073	1.07882	0.526413	1.20659	2.05082	0.442692	-0.0865611	-0.61544	0.206274	0.0766766	0.200802	0.355323	0.0580881	0.103619	0.182476	0.0365585	0.0212164	0.0276961	0.0300187
51646	YPEL5	-0.252467	0.117057	-2.15679	0.031022	0.272711	44.6364	12.6437	0.0490562	0.877801	-0.566922	-0.713136	-3.19228	-0.960644	-0.489116	-3.37914	0.171975	-0.129611	-0.299339	-0.48112	-0.129237	-0.197336	-0.677012	0.038383	0.0522681	0.17619	0.0227146	0.0180988	0.162775	0.0401403
84313	VPS25	-0.180697	0.0838038	-2.15619	0.0310691	0.272881	0	6.43889	0.37586	-2.4448	-1.25412	-1.10874	-1.27019	0.886165	0.049234	-0.629674	-0.442019	-0.249222	-0.469123	-0.208435	0.181334	0.0123008	-0.154823	0.0326887	0.0394904	0.179027	0.026928	0.0418726	0.0624215	0.0604561
54957	TXNL4B	-0.200893	0.0932584	-2.15415	0.0312281	0.274033	4.01569	7.29286	0.294611	0.255211	0.662502	-2.14741	-1.5791	-0.793601	-1.59522	-1.52238	0.0610143	0.220914	-0.944996	-0.485096	-0.113723	-0.277482	-0.289671	0.0571562	0.111191	0.193656	0.0943709	0.020535	0.0302573	0.0362049
51321	AMZ2	0.189256	0.087878	2.15363	0.0312695	0.274152	9.01264	7.69338	0.261439	2.54962	1.97776	-1.28432	0.728475	1.19956	-0.294878	0.632409	0.46118	0.434273	-0.545985	0.173461	0.147982	-0.0852235	0.113117	0.0327182	0.0482146	0.180723	0.056699	0.0152184	0.0835287	0.0319936
1912	PHC2	0.430917	0.200175	2.1527	0.031342	0.27447	72.7493	25.6874	0.000254558	-0.226978	-0.56744	3.29281	5.59384	1.69662	0.773344	1.5228	-0.0549918	-0.176187	1.57223	1.07079	0.380381	0.21271	0.318083	0.0586985	0.0964066	0.227979	0.0366427	0.0502651	0.0756536	0.0436307
51382	ATP6V1D	-0.283872	0.131883	-2.15245	0.0313617	0.27447	43.1415	12.3113	0.0553744	-1.05223	0.163142	-3.00177	0.0206982	-2.14312	-0.200474	-2.32433	-0.219895	0.0390434	-1.39732	0.00342675	-0.38991	-0.085422	-0.56543	0.0436731	0.057275	0.216688	0.0274093	0.0331008	0.181561	0.059178
54878	DPP8	-0.196923	0.0915256	-2.15156	0.0314318	0.274607	31.9856	10.2919	0.112884	0.659368	-0.424718	0.505164	-1.22479	-2.3705	-0.902149	-3.35941	0.10825	-0.0768616	0.211455	-0.202946	-0.326966	-0.202819	-0.544316	0.0269524	0.0327505	0.175214	0.0274561	0.019025	0.0505431	0.0262527
26240	FAM50B	-0.218813	0.101742	-2.15068	0.0315016	0.274607	7.67653	7.58204	0.27035	-1.04685	-1.9581	-1.37505	-2.39416	0.282424	-0.536348	0.0355956	-0.258569	-0.548538	-0.58615	-0.54726	0.0547283	-0.110496	0.00763425	0.0610081	0.0784775	0.181711	0.0522492	0.0375508	0.0424427	0.0459981
5316	PKNOX1	0.184799	0.0859315	2.15054	0.0315123	0.274607	8.6	7.65864	0.264194	1.66448	-0.128872	0.515812	1.36443	-0.43056	0.562543	2.88363	0.444029	-0.0371038	0.215937	0.216768	-0.06676	0.0946487	0.481452	0.0711647	0.0828931	0.175256	0.0252401	0.0240417	0.0283086	0.0278757
313	AOAH	0.391086	0.181862	2.15045	0.0315197	0.274607	65.441	20.2552	0.00249406	1.06299	5.06583	2.42289	-1.09198	2.13943	-0.0294346	1.24523	0.237482	1.12397	1.08282	-0.446631	0.414771	-0.00822012	0.269882	0.0499117	0.0492275	0.199732	0.16729	0.0375855	0.0779899	0.0469735
101	ADAM8	0.300718	0.139874	2.14992	0.0315613	0.274607	40.8786	11.84	0.065634	0.594957	-0.836963	2.56763	2.62431	2.13687	0.204611	1.12783	0.13568	-0.198798	1.15798	0.861428	0.351805	0.0823445	0.246838	0.0520069	0.0564174	0.203393	0.107747	0.027105	0.161962	0.0478999
90317	ZNF616	0.240062	0.111668	2.14978	0.0315727	0.274607	33.797	10.5735	0.102485	2.2405	0.0572875	0.798518	-0.366225	2.11814	-0.117942	2.91889	0.538533	0.0187693	0.335655	-0.0675524	0.318868	-0.0212245	0.648399	0.0577745	0.107343	0.176692	0.034024	0.0226626	0.0323843	0.0493458
79647	AKIRIN1	-0.327789	0.152502	-2.14941	0.0316021	0.27462	58.306	16.789	0.0100909	-1.10381	-1.1336	-2.58018	0.670582	-0.694584	-0.565539	-4.10849	-0.298673	-0.376748	-1.16459	0.119844	-0.115273	-0.160248	-0.755906	0.0732149	0.110453	0.203727	0.0319396	0.0275427	0.08029	0.0338509
1486	CTBS	0.302363	0.140698	2.14902	0.0316331	0.274647	48.8951	13.6973	0.0332063	1.70915	1.17125	3.62525	0.580165	2.14676	0.117432	-0.26578	0.364277	0.338912	1.79051	0.102566	0.395069	0.0375632	-0.0608153	0.0454261	0.0837281	0.243936	0.031254	0.0338672	0.102317	0.0523576
30827	CXXC1	-0.307533	0.143153	-2.14828	0.0316914	0.274683	59.8785	17.447	0.00777345	-0.667726	-1.68232	-1.95593	-5.1677	0.341542	-0.540042	-0.494616	-0.141122	-0.336647	-0.852678	-0.805092	0.0663657	-0.175692	-0.0943851	0.0446679	0.0400436	0.190048	0.0242715	0.0377572	0.10584	0.0364142
27101	CACYBP	-0.179823	0.0837065	-2.14826	0.0316931	0.274683	3.44938	7.25008	0.298338	0.15565	-0.198463	-2.18692	-2.007	-1.44061	0.366583	-1.45007	0.02802	-0.0496918	-0.96438	-0.320645	-0.1943	0.086947	-0.327678	0.0324067	0.0626918	0.19446	0.0255243	0.018191	0.0562555	0.0510641
5970	RELA	-0.276355	0.128708	-2.14715	0.0317817	0.275209	46.4781	13.0788	0.0418023	-0.540753	-1.46987	-2.76758	-1.90878	0.270311	0.124361	-2.39978	-0.126773	-0.541311	-1.2654	-0.386163	0.0363096	0.0296343	-0.457783	0.0549611	0.135623	0.209052	0.0409286	0.0180433	0.0567835	0.0363895
57095	PITHD1	-0.340248	0.158537	-2.14617	0.0318593	0.275302	47.0521	13.2205	0.0396645	-1.13189	-0.232531	0.232689	-0.914604	-1.33378	-0.330283	-4.80918	-0.317047	-0.0766427	0.097187	-0.216954	-0.246096	-0.157601	-1.08888	0.0784588	0.108637	0.174448	0.0562692	0.0340441	0.227691	0.0512644
54914	FOCAD	-0.166808	0.0777313	-2.14596	0.0318764	0.275302	0	5.61411	0.467774	-0.276199	-1.19445	-0.607201	-1.76386	0.813404	-0.678361	-2.02843	-0.0581276	-0.247271	-0.254482	-0.315481	0.14224	-0.143618	-0.385912	0.0442916	0.0428557	0.17565	0.0319903	0.0305797	0.0448221	0.0361956
65083	NOL6	-0.27145	0.126494	-2.14596	0.0318765	0.275302	45.266	12.7891	0.0465097	-0.853424	-2.33278	-1.60406	-3.04686	0.231305	-1.10909	0.407015	-0.170986	-0.58582	-0.689124	-0.704312	0.0335451	-0.279144	0.0914376	0.0401411	0.063064	0.184566	0.0534351	0.0210325	0.0633464	0.0504695
140735	DYNLL2	-0.271419	0.126545	-2.14485	0.0319649	0.275564	46.7954	13.1568	0.0406131	-2.48985	-0.377147	-2.70373	-0.887651	-0.102679	0.514942	-2.7169	-0.483533	-0.11053	-1.23061	-0.14966	-0.0179767	0.124991	-0.573809	0.0377143	0.0858896	0.207164	0.0284269	0.0306516	0.0589169	0.0446056
5715	PSMD9	-0.248799	0.116007	-2.14469	0.0319777	0.275564	40.626	11.7897	0.0668287	-0.763595	-1.48348	-1.80669	-3.2092	0.343279	0.195694	-1.45931	-0.1481	-0.345416	-0.782426	-0.679782	0.0536741	0.0393682	-0.337418	0.0376171	0.054215	0.187551	0.0448689	0.0244475	0.04047	0.0534614
7957	EPM2A	-0.3715	0.173254	-2.14425	0.0320132	0.275564	72.4539	25.4119	0.000286395	-2.75279	0.784678	-3.0608	0.779738	-1.72113	-1.06348	-4.6875	-0.55862	0.172795	-1.43174	0.195828	-0.351399	-0.185452	-0.862483	0.0411799	0.0484932	0.218805	0.0630745	0.0416846	0.0304092	0.0338547
11031	RAB31	0.290347	0.135412	2.14418	0.0320188	0.275564	35.8312	10.9087	0.0912384	2.55813	1.45356	2.98958	0.127325	1.144	0.150054	-0.337209	0.512605	0.375698	1.39027	0.0274337	0.254056	0.0616463	-0.086085	0.0401532	0.0668057	0.216261	0.0464236	0.0493184	0.16878	0.0651714
90809	PIP4P1	-0.240338	0.112137	-2.14325	0.0320929	0.275939	34.1028	10.6226	0.100764	-0.666744	-1.34049	0.0681872	-3.70599	0.695382	-0.495496	-2.03741	-0.115383	-0.368732	0.0284644	-0.589801	0.133437	-0.141224	-0.423692	0.0299478	0.0756643	0.17426	0.0253281	0.0368219	0.0812344	0.0432459
820	CAMP	0.345797	0.161555	2.14043	0.0323202	0.277429	5.74155	7.42639	0.283207	1.2346	-0.0252014	3.09063	0.762265	0.46019	0.418319	0.821724	0.398058	-0.0101855	1.44933	0.496956	0.110351	0.200073	0.319604	0.103954	0.163347	0.219907	0.425034	0.0575009	0.22875	0.151276
11024	LILRA1	0.334576	0.15639	2.13936	0.0324061	0.277924	54.8029	15.4877	0.0167844	-0.927069	-0.118857	2.23467	3.98242	1.71662	2.05423	0.403033	-0.273311	-0.0435133	0.98797	0.997012	0.318869	0.36011	0.0976152	0.0869143	0.134029	0.195462	0.0626766	0.0345047	0.0307308	0.0586616
54542	RC3H2	-0.308919	0.144475	-2.13821	0.0324993	0.278481	61.9564	18.4	0.00530667	0.68122	-2.06253	-2.65798	-0.364794	-0.340445	-1.1652	-3.74748	0.131377	-0.558183	-1.20597	-0.0570639	-0.0583366	-0.295701	-0.719857	0.0371932	0.0732407	0.205859	0.0244696	0.0293622	0.0644028	0.0368989
23223	RRP12	0.273791	0.128171	2.13615	0.0326672	0.279297	36.9095	11.0952	0.0854793	0.610276	2.83513	1.96105	-0.522647	2.03832	-0.436649	1.51929	0.143732	0.826273	0.855113	-0.11624	0.394235	-0.123951	0.299796	0.0554693	0.0849378	0.190138	0.0494645	0.0374082	0.0805821	0.0389379
115761	ARL11	0.285575	0.133711	2.13576	0.0326992	0.279297	28.0605	9.7304	0.136474	0.47484	0.684705	3.21378	0.888028	1.76558	1.05548	-0.259261	0.142797	0.245177	1.52339	0.257303	0.404208	0.222799	-0.0575509	0.0904366	0.128219	0.224693	0.0839532	0.0524122	0.0445583	0.0492754
4697	NDUFA4	-0.447442	0.209549	-2.13526	0.0327395	0.279297	79.9447	34.9035	4.49903e-06	-2.25003	-2.05763	-3.47967	-6.1175	-0.180533	-0.168629	0.972208	-0.40521	-0.502247	-1.69218	-1.04008	-0.0280052	-0.0668352	0.231335	0.0324329	0.0595798	0.236492	0.0289058	0.0240637	0.157089	0.0566193
29902	FAM216A	-0.315177	0.14762	-2.13506	0.0327559	0.279297	64.4957	19.7159	0.00311083	-0.750174	-1.58065	-1.76733	-5.04423	-1.3856	-0.612156	0.814074	-0.172274	-0.349105	-0.764121	-0.96683	-0.213061	-0.116874	0.175584	0.0527371	0.0487799	0.186936	0.0367376	0.0236445	0.0364515	0.0465202
55512	SMPD3	-0.245201	0.114875	-2.13449	0.0328023	0.279297	5.62516	7.41723	0.283978	-1.05301	-2.09339	1.58451	-0.227804	-0.998621	-1.05486	-1.86223	-0.320173	-0.707252	0.680235	-0.0969873	-0.246851	-0.180051	-0.413059	0.0924497	0.114143	0.184302	0.181261	0.0611037	0.0291338	0.0491991
2186	BPTF	-0.323439	0.151543	-2.13431	0.0328174	0.279297	72.1113	25.0998	0.000327226	-0.490007	-0.879861	-2.30933	-4.99547	0.156944	0.114115	-2.4735	-0.106499	-0.213341	-1.02523	-0.966538	0.0200663	0.0190982	-0.396446	0.0472378	0.0587924	0.197092	0.0374357	0.0163471	0.0280092	0.0256889
80273	GRPEL1	0.272344	0.127606	2.13426	0.0328217	0.279297	51.0659	14.305	0.026409	1.83799	1.08932	-0.285758	4.47928	-0.442152	0.400404	1.64711	0.355879	0.262269	-0.119388	0.787284	-0.0740081	0.107481	0.31674	0.0374902	0.0579667	0.174552	0.030892	0.0280167	0.0720553	0.0369794
79701	OGFOD3	0.160563	0.0752907	2.13257	0.0329598	0.280056	0	3.96584	0.6813	0.986903	1.26899	-0.743281	2.06295	0.124057	0.737201	0.749876	0.197034	0.261311	-0.312143	0.424995	0.0202975	0.129488	0.139886	0.0398596	0.0424033	0.176361	0.0424416	0.0267697	0.0308523	0.0347993
11212	PLPBP	0.172168	0.0807429	2.1323	0.0329826	0.280056	0	3.44248	0.751606	1.89279	1.19252	-0.508229	0.808636	0.445498	-0.309782	1.33333	0.356931	0.295311	-0.212745	0.126034	0.0805622	-0.0958451	0.290532	0.03556	0.0613238	0.175226	0.0242923	0.0327017	0.0957256	0.0474801
79652	TMEM204	-0.333623	0.156474	-2.13213	0.0329963	0.280056	52.347	14.6895	0.022814	-2.22358	-0.827564	-1.31437	-4.14753	0.521539	-0.870413	0.00240186	-0.587629	-0.23781	-0.559253	-0.926699	0.107674	-0.222362	0.000638203	0.0698396	0.0825767	0.181042	0.0499226	0.0426233	0.0652633	0.0706027
2618	GART	-0.149192	0.0700085	-2.13105	0.0330852	0.280568	0	6.11279	0.410675	-0.742217	-2.17438	-1.40754	-1.19015	-0.787665	-0.753906	0.939773	-0.135632	-0.401216	-0.600617	-0.170728	-0.115043	-0.170223	0.174637	0.0333935	0.0340474	0.182085	0.0205783	0.0213324	0.0509802	0.0345325
54739	XAF1	0.226861	0.106491	2.13034	0.0331435	0.28082	0	6.55187	0.364282	0.781878	0.493456	1.15871	-0.222336	0.809685	-0.536275	2.93786	0.211834	0.149145	0.490889	-0.0571117	0.18364	-0.177081	0.600576	0.0734028	0.0913528	0.179481	0.0659831	0.0514402	0.109036	0.0417901
94103	ORMDL3	-0.319326	0.150011	-2.12868	0.0332804	0.281567	56.7958	16.2021	0.0127092	-2.64505	-1.11603	-1.44739	-4.72572	1.04113	-0.553932	-0.437283	-0.708884	-0.327213	-0.618422	-0.621294	0.199436	-0.181834	-0.0980756	0.0718259	0.0859622	0.182556	0.0172846	0.0366945	0.107755	0.0503033
126308	MOB3A	0.24611	0.115621	2.12858	0.0332888	0.281567	36.7658	11.07	0.0862383	-0.280026	2.41852	2.50883	-0.359931	2.78926	0.439688	0.792777	-0.0618295	0.559184	1.1272	-0.0796628	0.373435	0.135119	0.151347	0.0487522	0.0534579	0.201864	0.0489862	0.0179247	0.0944381	0.0364456
7390	UROS	-0.2316	0.108925	-2.12623	0.0334842	0.282454	10.1763	7.79304	0.253661	-0.96197	-2.78815	-0.662339	-2.09882	0.343832	0.423235	-0.535031	-0.238207	-0.712001	-0.277804	-0.401842	0.08066	0.124797	-0.123311	0.0613178	0.0652121	0.17592	0.0366574	0.0550332	0.0869454	0.0531181
2178	FANCE	-0.474772	0.223324	-2.12594	0.0335086	0.282454	82.6521	40.3507	3.88655e-07	0.273102	-1.34229	-0.155763	-7.86294	-1.54132	-0.834733	-4.31058	0.0639707	-0.311627	-0.0650364	-1.47185	-0.2843	-0.199993	-0.882883	0.054867	0.0538985	0.174334	0.0350396	0.0340227	0.0574029	0.0419502
221294	NT5DC1	0.317518	0.1494	2.12529	0.0335624	0.282666	64.2555	19.5834	0.00328381	1.85004	0.362629	-0.137875	5.06355	0.543697	-0.343975	3.19322	0.491968	0.105797	-0.057564	0.853308	0.0866452	-0.0682706	0.574143	0.0707149	0.0851174	0.174314	0.0283989	0.0253966	0.0393925	0.0323283
79707	NOL9	-0.191959	0.0903844	-2.12381	0.0336862	0.283165	0	5.21606	0.516416	-1.30896	-0.34388	-1.86291	-1.93988	-0.0275291	0.146468	-0.7995	-0.40421	-0.137071	-0.808727	-0.34551	-0.00590274	0.0296728	-0.167867	0.0953585	0.158884	0.188461	0.0317228	0.0459751	0.0410426	0.0440854
79856	SNX22	0.2946	0.138764	2.12303	0.0337515	0.283165	46.8077	13.1598	0.0405673	-1.17394	1.02929	-0.118334	3.45898	0.404373	2.21444	2.65848	-0.340876	0.357129	-0.0494028	0.953464	0.0877009	0.36985	0.46209	0.084314	0.120385	0.174295	0.0759823	0.0470375	0.0278948	0.0302123
79012	CAMKV	0.26954	0.12697	2.12286	0.0337657	0.283165	51.2477	14.3583	0.02588	-0.209687	1.75846	1.36196	4.0657	0.0913725	0.406008	1.24516	-0.0507355	0.523068	0.580334	0.85802	0.0161737	0.066124	0.198662	0.0585437	0.088481	0.181564	0.0445373	0.0313321	0.0265246	0.0254551
5689	PSMB1	-0.294823	0.138922	-2.12222	0.0338191	0.283372	59.8445	17.4323	0.00781928	-2.85126	-0.33741	-1.77944	-4.46874	0.397371	0.162502	-0.908518	-0.463306	-0.0696487	-0.769745	-0.748235	0.0594823	0.0624156	-0.204367	0.0264035	0.0426098	0.187123	0.0280354	0.022407	0.147527	0.0506005
55364	IMPACT	-0.240234	0.113226	-2.12173	0.0338608	0.283386	35.2305	10.8076	0.0945095	-0.442806	-1.28832	-1.409	-3.04491	-0.972631	0.952042	-1.50815	-0.108563	-0.339092	-0.601267	-0.564852	-0.210974	0.140951	-0.324111	0.0601088	0.0692771	0.182102	0.0344129	0.0470502	0.0219191	0.0461846
57533	TBC1D14	0.232741	0.109705	2.12152	0.0338784	0.283386	27.5325	9.6595	0.139743	1.63042	2.49795	2.1707	-0.250191	1.80947	-0.167683	-0.235326	0.307219	0.530207	0.956408	-0.0497418	0.321222	-0.0637239	-0.0468399	0.0355056	0.0450531	0.194128	0.0395275	0.0315142	0.144419	0.039618
11252	PACSIN2	0.270043	0.127339	2.12066	0.0339506	0.283746	52.4287	14.7148	0.0225952	1.71258	3.41461	2.89422	0.509676	1.16706	0.0453015	-0.589779	0.306066	0.593639	1.33585	0.0859002	0.218409	0.0169742	-0.108144	0.0319394	0.0302248	0.213036	0.0284053	0.0350231	0.140395	0.0336223
6307	MSMO1	-0.336288	0.158603	-2.12032	0.0339791	0.283746	52.8014	14.8309	0.0216132	0.155262	0.13107	-2.19588	-3.66587	-0.414546	-0.555957	-2.25823	0.0348363	0.0349937	-0.968795	-0.940706	-0.0933987	-0.145255	-0.60753	0.0503426	0.0712807	0.194646	0.0658498	0.0507618	0.0682621	0.0723768
55245	UQCC1	-0.189918	0.0896191	-2.11916	0.0340766	0.284318	0	6.35772	0.384333	0.433707	-2.27836	-1.12758	-0.353586	-0.574852	-1.92869	-0.508814	0.108267	-0.71455	-0.477321	-0.0672704	-0.108726	-0.382923	-0.111657	0.0623155	0.09836	0.179195	0.0361959	0.0357728	0.0394183	0.0481559
978	CDA	0.324765	0.153306	2.11841	0.0341403	0.284489	32.5442	10.3772	0.109641	-0.581875	0.413875	3.11644	1.45646	1.49521	0.552317	1.35077	-0.139347	0.128796	1.46465	0.565347	0.357263	0.216962	0.336244	0.0573502	0.0968427	0.220877	0.150673	0.0570918	0.154308	0.0619649
7504	XK	-0.351292	0.165841	-2.11824	0.0341549	0.284489	38.143	11.3164	0.0790757	-0.710515	-0.27343	-2.38502	1.1356	-1.65261	-0.601427	-3.37092	-0.231382	-0.0908649	-1.06349	0.461825	-0.303136	-0.27386	-0.854153	0.10605	0.110434	0.19883	0.16539	0.0336461	0.207344	0.0642059
777	CACNA1E	0.398523	0.188298	2.11645	0.0343064	0.285132	65.8984	20.5269	0.00223028	1.60892	1.79061	1.75775	1.04947	-0.297854	-0.58201	4.73976	0.514221	0.667009	0.759683	0.268325	-0.0754964	-0.105087	0.988984	0.102148	0.138758	0.186788	0.0653699	0.0642458	0.0326013	0.0435377
240	ALOX5	0.290275	0.137178	2.11604	0.0343411	0.285132	48.6121	13.6219	0.0341571	1.29319	0.013026	3.45405	2.31131	1.06325	0.0463677	0.591497	0.290759	0.00344442	1.67533	0.559801	0.233333	0.00738369	0.143294	0.0505523	0.0699213	0.235259	0.0586614	0.0481593	0.025358	0.0586878
2017	CTTN	-0.258337	0.122109	-2.11562	0.0343768	0.285132	42.973	12.2749	0.05611	-1.09285	0.289926	-1.42659	0.922108	-2.4635	-2.01427	-2.31734	-0.231205	0.0637281	-0.609121	0.156549	-0.485484	-0.460831	-0.550782	0.0447587	0.0483157	0.182308	0.0288228	0.0388368	0.0523415	0.0564911
64135	IFIH1	0.241392	0.114134	2.11499	0.0344309	0.285132	13.624	8.1041	0.230576	1.78515	1.67904	1.50686	0.276691	2.25763	-1.05427	0.210683	0.447941	0.487739	0.645121	0.0677997	0.425083	-0.285474	0.0522984	0.0629641	0.0843824	0.18329	0.0600436	0.0354521	0.0733213	0.0616194
91039	DPP9	-0.219539	0.103805	-2.11491	0.0344375	0.285132	4.71399	7.3463	0.290005	-0.867493	-0.619123	-1.30046	-3.01781	-0.607009	-0.51311	0.499541	-0.218374	-0.18138	-0.553105	-0.652075	-0.105462	-0.156614	0.110116	0.063368	0.0858271	0.180893	0.0466886	0.030186	0.0931628	0.0485916
284390	ZNF763	0.356216	0.168472	2.1144	0.0344813	0.285132	54.8275	15.4962	0.0167295	-0.627141	0.599584	2.39467	3.99618	1.80427	-0.474061	1.51722	-0.203416	0.244932	1.0684	0.903998	0.339164	-0.110717	0.400409	0.105206	0.166875	0.199057	0.0511734	0.035336	0.0545452	0.0696479
4794	NFKBIE	0.250976	0.118725	2.11392	0.0345224	0.285132	36.4248	11.0106	0.0880499	0.428376	1.44159	1.89992	2.77434	2.07525	-0.140682	-0.52531	0.0984558	0.410491	0.82615	0.659955	0.358817	-0.0265138	-0.107235	0.0528241	0.0810815	0.18908	0.0565861	0.0298955	0.0355198	0.041672
83998	REG4	-0.215241	0.101841	-2.1135	0.0345584	0.285132	5.41056	7.4004	0.285399	-1.29316	-0.304952	-0.318213	-2.87426	-0.24316	0.169268	-1.58538	-0.345299	-0.0950396	-0.132976	-0.810912	-0.0601009	0.0290749	-0.273321	0.0712992	0.0971287	0.174627	0.0795965	0.0610912	0.0295045	0.0297222
9111	NMI	0.26117	0.123587	2.11324	0.0345799	0.285132	31.9016	10.2792	0.113375	1.75387	2.59301	1.99227	0.54911	1.90617	-0.167133	-0.934174	0.372071	0.7607	0.870002	0.123776	0.2805	-0.0621577	-0.227589	0.0450046	0.0860632	0.190697	0.0508104	0.0216543	0.138314	0.0593538
8444	DYRK3	-0.209794	0.099322	-2.11226	0.0346639	0.285247	0	4.47412	0.612794	-0.833446	-0.0944746	-1.67357	-0.420761	0.0710037	-0.988222	-2.06705	-0.237628	-0.0304818	-0.720879	-0.103508	0.0174129	-0.188261	-0.56538	0.0812907	0.1041	0.18554	0.0605164	0.060142	0.0362921	0.0748129
64386	MMP25	0.383022	0.181352	2.11203	0.0346839	0.285247	51.168	14.3349	0.0261113	0.341839	-0.416833	3.44022	2.75039	1.98276	0.148738	0.546908	0.108398	-0.14915	1.6663	0.885655	0.419835	0.0549284	0.127575	0.100554	0.128033	0.234602	0.103691	0.044835	0.136381	0.0544126
113115	MTFR2	0.212559	0.100645	2.11197	0.0346887	0.285247	20.6559	8.82233	0.183819	1.56005	3.48137	0.191869	-0.0369694	0.77244	0.807291	-0.236124	0.331796	0.672262	0.0801225	-0.0121575	0.15805	0.131956	-0.0431342	0.0452338	0.0372888	0.174382	0.108144	0.0418657	0.0267178	0.0333706
10160	FARP1	-0.253793	0.120183	-2.11173	0.0347099	0.285247	54.8138	15.4915	0.0167601	-2.58916	-0.129086	-0.779978	-3.90706	-1.30634	0.389587	-0.509198	-0.442011	-0.0272687	-0.327756	-0.889595	-0.256828	0.0615643	-0.0731312	0.029144	0.0446242	0.176578	0.0518425	0.038652	0.0249718	0.0206269
9758	FRMPD4	0.171813	0.0813902	2.11098	0.0347741	0.285536	0	2.57776	0.859666	0.0836039	0.984572	1.1208	0.711279	-0.115372	1.66818	1.22449	0.021253	0.258599	0.474372	0.225541	-0.0202103	0.255355	0.222836	0.0646231	0.0689856	0.179134	0.100548	0.0306865	0.0234318	0.0331176
143	PARP4	0.182879	0.086649	2.11058	0.0348087	0.285583	0	3.73887	0.711964	0.170093	0.827999	1.94888	0.575588	1.55967	-0.344769	0.893327	0.0360434	0.197012	0.849327	0.150843	0.24323	-0.12071	0.181761	0.0449033	0.0566141	0.189924	0.0686793	0.0243204	0.122582	0.041398
10152	ABI2	-0.351165	0.166483	-2.10931	0.0349179	0.286076	77.9404	31.7322	1.83635e-05	-2.28042	0.417307	-2.6921	-5.97839	-1.97894	0.530374	-0.612858	-0.410621	0.0874908	-1.22432	-0.979212	-0.293616	0.0845947	-0.118604	0.032423	0.0439555	0.206829	0.0268278	0.0220138	0.0254403	0.0374525
360023	ZBTB41	-0.282616	0.133992	-2.1092	0.034927	0.286076	43.0642	12.2945	0.0557113	0.932913	-1.48025	-0.359098	-3.43667	-0.607482	-0.452558	-2.57095	0.277078	-0.485728	-0.150107	-0.716844	-0.114103	-0.0829733	-0.6159	0.0882109	0.107675	0.174732	0.0435084	0.0352797	0.0336147	0.0573896
85464	SSH2	0.223345	0.105956	2.1079	0.0350399	0.286565	20.7801	8.83617	0.183004	-0.14897	1.32075	2.83987	1.52472	1.42808	-0.15579	0.745296	-0.0258948	0.270618	1.30537	0.432059	0.233717	-0.0610625	0.142676	0.0302153	0.0419826	0.211286	0.0802984	0.0267841	0.153629	0.0366473
169714	QSOX2	-0.2019	0.0957855	-2.10784	0.0350451	0.286565	0	2.29595	0.890568	-1.49275	-0.768437	-0.0868076	-1.84225	-0.384269	-0.00607589	-0.609099	-0.354002	-0.200508	-0.0362385	-0.401167	-0.0852238	-0.00159131	-0.158387	0.0562389	0.0680844	0.174271	0.047419	0.0491872	0.0685945	0.0676184
5611	DNAJC3	0.234823	0.111446	2.10706	0.035112	0.286874	18.5022	8.58919	0.198034	1.56687	1.74139	2.32462	0.486181	1.18857	1.01088	-0.738715	0.441553	0.618564	1.03292	0.117787	0.203253	0.200904	-0.155599	0.0794145	0.126177	0.197436	0.0586948	0.029243	0.0394979	0.0443671
10947	AP3M2	-0.173932	0.0825623	-2.10667	0.0351461	0.286915	0	4.1755	0.65294	0.687808	-1.92411	-0.697179	-1.04541	-1.24205	-1.04062	-0.483512	0.146651	-0.500786	-0.292569	-0.217787	-0.183067	-0.264272	-0.108976	0.0454606	0.0677403	0.176103	0.0433999	0.0217241	0.0644939	0.0507984
10606	PAICS	-0.302659	0.143703	-2.10614	0.0351922	0.287014	64.7299	19.8468	0.00294869	-0.617063	-1.13768	-2.68459	-4.89237	0.0144632	-0.680145	-0.280936	-0.105059	-0.214548	-1.22027	-0.820764	0.00250478	-0.179848	-0.057196	0.0289874	0.0355638	0.206613	0.0281448	0.0299922	0.0699212	0.0414493
57171	DOLPP1	-0.438903	0.208425	-2.10581	0.0352207	0.287014	82.8844	40.8983	3.03238e-07	-1.8448	-3.20362	-1.35406	-7.8125	-0.724456	-0.335904	0.328073	-0.332847	-0.729917	-0.57683	-1.32131	-0.133035	-0.0673248	0.0712117	0.032553	0.0519116	0.181476	0.0286044	0.0337215	0.0401716	0.0471154
114781	BTBD9	0.220624	0.104819	2.1048	0.0353085	0.287014	19.2063	8.66405	0.193372	-0.19255	-1.05044	1.75322	0.836574	1.95201	1.18955	2.35545	-0.0465216	-0.282631	0.757584	0.190154	0.395806	0.202481	0.481037	0.0583746	0.0723924	0.186719	0.0516658	0.0411151	0.0289737	0.0417071
1875	E2F5	-0.203581	0.0967334	-2.10456	0.0353299	0.287014	0	6.10343	0.411704	0.366652	-0.309923	-0.318118	-2.92302	-1.12607	-0.567931	-0.409536	0.0961311	-0.107363	-0.132936	-0.719355	-0.212085	-0.137128	-0.0947989	0.0687415	0.120006	0.174627	0.0605652	0.0354719	0.0582987	0.0535823
9810	RNF40	-0.366254	0.174052	-2.10428	0.0353543	0.287014	70.2624	23.5392	0.000634608	-0.532372	-2.11463	-2.13379	-4.8303	1.18742	-0.441294	-1.83096	-0.127595	-0.493091	-0.938344	-0.912534	0.190431	-0.137347	-0.369597	0.0574433	0.0543732	0.193384	0.0356903	0.0257198	0.0968685	0.0407471
134957	STXBP5	0.285584	0.135736	2.10396	0.0353817	0.287014	51.1058	14.3166	0.0262925	2.79439	0.669512	2.82316	2.35215	1.65566	-0.297431	-0.961477	0.56329	0.16698	1.29607	0.405656	0.307029	-0.0867351	-0.207437	0.0406339	0.0622029	0.21076	0.0297431	0.0343889	0.0850391	0.0465473
7124	TNF	-0.294906	0.140174	-2.10385	0.0353917	0.287014	38.9771	11.4711	0.074863	-0.932065	-0.476484	-1.69216	-0.844359	-1.13538	0.848183	-3.6625	-0.25936	-0.154359	-0.729415	-0.322635	-0.235893	0.170652	-0.736696	0.0774306	0.104947	0.185809	0.146005	0.0431666	0.04048	0.0404595
84823	LMNB2	-0.241683	0.114948	-2.10254	0.0355059	0.287142	35.2021	10.8028	0.0946648	-0.395804	-2.93206	-0.458357	-1.72954	0.875175	-0.620779	-2.222	-0.0777686	-0.675745	-0.191768	-0.428855	0.153624	-0.153787	-0.408991	0.0386054	0.0531153	0.175042	0.0614837	0.0308127	0.0613711	0.0338796
5997	RGS2	0.393463	0.187146	2.10244	0.0355149	0.287142	69.7586	23.1471	0.000748679	3.64987	1.15087	3.10934	-1.7431	3.94503	0.632132	0.560908	0.73105	0.300307	1.46042	-0.43826	0.631587	0.286758	0.115657	0.040118	0.0680893	0.220608	0.0632146	0.025631	0.205785	0.0425168
4051	CYP4F3	0.37794	0.179795	2.10206	0.035548	0.287142	44.8589	12.6947	0.0481484	0.325429	0.0543932	3.39418	2.75198	1.52158	-0.122263	0.385901	0.107664	0.0211489	1.63648	0.823227	0.325453	-0.0402337	0.132226	0.109452	0.151177	0.232461	0.0894844	0.0457497	0.108291	0.117403
10260	DENND4A	-0.260016	0.123699	-2.102	0.0355534	0.287142	28.0886	9.7342	0.136301	-0.490227	0.851982	-1.72414	-0.913663	-0.979154	-0.566994	-3.36387	-0.128287	0.277737	-0.744142	-0.187148	-0.194115	-0.145203	-0.785391	0.0684813	0.106269	0.18628	0.0419563	0.0393022	0.0655831	0.0545123
79730	NSUN7	0.277946	0.132271	2.10134	0.0356111	0.287372	27.4175	9.64419	0.140458	1.69911	2.30423	1.2067	2.15006	0.555559	0.26992	-0.755452	0.453528	0.783109	0.51187	0.684327	0.127962	0.0574888	-0.179357	0.0712469	0.115503	0.179938	0.101304	0.0530523	0.0453623	0.0563666
84449	ZNF333	0.223969	0.106603	2.10097	0.035644	0.287402	22.9552	9.08562	0.16882	2.13992	1.45303	1.9461	1.92251	0.299589	-0.227984	0.0372508	0.559236	0.419675	0.848008	0.417709	0.0527916	-0.045801	0.00653196	0.0682958	0.0834215	0.189875	0.0472075	0.0310512	0.0403592	0.0307479
10098	TSPAN5	-0.280337	0.133463	-2.10048	0.035687	0.287465	20.8639	8.84552	0.182454	-1.23802	0.0958837	-0.769981	-2.56985	0.397935	-0.375213	-2.3215	-0.383695	0.0317306	-0.3235	-0.689276	0.0701921	-0.154917	-0.609409	0.0960537	0.109513	0.176517	0.0719397	0.0311137	0.170468	0.0689097
55128	TRIM68	-0.223103	0.106319	-2.09843	0.035867	0.28849	29.7077	9.95841	0.126414	-1.31568	-0.834703	-1.10633	-3.67316	-0.750996	0.083057	0.324203	-0.243534	-0.195958	-0.468076	-0.695287	-0.136152	0.0196645	0.0644062	0.0342623	0.0551137	0.179005	0.0358301	0.0328677	0.0560548	0.0394657
26094	DCAF4	-0.416388	0.198499	-2.09769	0.0359326	0.288678	72.9262	25.8552	0.000236899	-1.02921	-1.56262	-2.21394	-5.33157	0.916801	-0.659289	-0.971143	-0.251853	-0.464016	-0.977705	-1.28548	0.180851	-0.137629	-0.237087	0.0598805	0.088178	0.195023	0.0581323	0.0389127	0.0435784	0.0596006
2588	GALNS	0.313871	0.149654	2.09732	0.0359656	0.288678	60.4772	17.7113	0.00699571	1.83589	0.159729	2.66817	-1.09756	1.80348	0.504876	3.83655	0.507842	0.0492391	1.21144	-0.22581	0.296241	0.0958111	0.697954	0.0765183	0.095028	0.206146	0.0423282	0.0269816	0.0360133	0.0330957
79664	ICE2	-0.159574	0.0760899	-2.09717	0.0359784	0.288678	0	5.18357	0.520494	-0.938018	0.660074	-0.33985	-1.57857	-1.03116	0.0338004	-2.14343	-0.20678	0.164536	-0.14204	-0.335011	-0.142265	0.00597968	-0.440899	0.0485955	0.062135	0.174681	0.0450391	0.0190345	0.0312977	0.0423115
56940	DUSP22	0.269385	0.128663	2.09372	0.0362848	0.290277	54.0913	15.2476	0.0184156	1.78834	-0.322598	2.5549	2.78635	-0.476758	-0.121366	2.93725	0.296138	-0.0825321	1.15128	0.452183	-0.0733839	-0.0377319	0.562083	0.0274213	0.0654521	0.203057	0.0263365	0.0236923	0.096655	0.0366201
622	BDH1	-0.314365	0.150174	-2.09334	0.0363189	0.290277	62.6042	18.7187	0.00466605	-0.0371572	-4.3366	-0.28904	-2.8152	-0.404976	0.267348	-1.98536	-0.00729608	-0.801263	-0.120762	-0.811104	-0.0882176	0.0436629	-0.456609	0.0385561	0.0341391	0.174559	0.0830106	0.0474518	0.0266729	0.0528946
6670	SP3	0.279723	0.133669	2.09266	0.0363792	0.290277	60.3105	17.6369	0.00720662	2.92755	1.83985	2.35398	-1.46479	2.12132	-0.200226	1.94623	0.561844	0.474068	1.04773	-0.237461	0.300932	-0.0471909	0.347864	0.0368318	0.0663918	0.198107	0.0262806	0.0201245	0.0555491	0.0319471
152189	CMTM8	-0.205212	0.0980628	-2.09266	0.0363798	0.290277	0	2.74558	0.840035	-1.3916	-1.31554	-0.381464	-1.70707	-0.242266	0.0328967	-0.581573	-0.368771	-0.42017	-0.159485	-0.385574	-0.0539307	0.00839173	-0.133151	0.070224	0.102011	0.174795	0.0510167	0.0495548	0.0650726	0.0524181
4660	PPP1R12B	0.311413	0.148816	2.09261	0.0363842	0.290277	62.7906	18.8124	0.00449242	0.424673	-0.212776	3.02642	1.16704	1.46563	-0.145667	4.06164	0.0897238	-0.0547812	1.41163	0.230562	0.273932	-0.0254048	0.84039	0.044638	0.0662855	0.217562	0.0390304	0.0349331	0.0304166	0.0428114
4664	NAB1	0.33448	0.159921	2.09153	0.0364807	0.290599	67.4497	21.5052	0.00148792	1.79893	0.599146	2.95452	-0.230585	1.46098	-0.642047	4.37892	0.420412	0.167626	1.37012	-0.0360706	0.22502	-0.175576	0.835054	0.0546162	0.0782744	0.215052	0.0244705	0.0237221	0.0747819	0.036366
8872	CDC123	0.167741	0.0802109	2.09126	0.0365052	0.290599	0	4.76587	0.574174	0.895168	2.00935	1.13054	-0.394749	1.32465	-0.348841	0.995021	0.158546	0.449246	0.47861	-0.0717273	0.230807	-0.113424	0.197896	0.0313693	0.049987	0.179222	0.0330163	0.0303596	0.105719	0.0395558
10051	SMC4	-0.185166	0.0885467	-2.09117	0.0365132	0.290599	0	6.69743	0.349737	-0.600473	-1.79747	-1.78117	0.675823	-0.946735	-1.07726	-1.4151	-0.119062	-0.42668	-0.77055	0.117199	-0.157877	-0.278532	-0.382429	0.0393151	0.0563483	0.18715	0.0300731	0.0278086	0.0668513	0.0730342
6195	RPS6KA1	0.164632	0.0787637	2.0902	0.0365994	0.29085	0	6.08261	0.414	-0.645662	0.736258	1.84486	0.931788	1.00471	0.107659	2.06631	-0.109062	0.151576	0.800261	0.218557	0.187191	0.0309792	0.322451	0.0285325	0.0423841	0.188165	0.0550169	0.0347129	0.0828013	0.0243522
124454	EARS2	-0.27777	0.132944	-2.08937	0.0366742	0.291099	50.1152	14.0323	0.0292769	-0.615481	-2.99651	-0.847579	-3.30966	-1.28969	0.398105	0.196173	-0.156197	-0.851794	-0.356595	-0.712017	-0.193291	0.0783691	0.0426137	0.0644048	0.0808048	0.177007	0.0462822	0.0224622	0.038752	0.0471869
51251	NT5C3A	-0.352875	0.168908	-2.08915	0.0366944	0.291099	65.3943	20.2279	0.00252223	0.474877	-2.23315	0.344224	-4.91567	-0.283896	-0.771138	-3.11846	0.107198	-0.526963	0.143873	-0.839448	-0.0503939	-0.274333	-0.827225	0.0509575	0.0556832	0.174692	0.0291624	0.0315093	0.126558	0.0703664
1316	KLF6	0.247683	0.118605	2.0883	0.0367708	0.291273	26.9479	9.5822	0.143385	-0.533503	0.696168	2.42361	0.0359823	2.03139	0.0246095	2.65016	-0.110667	0.170734	1.08319	0.0100087	0.380581	0.0102145	0.45408	0.043029	0.0601466	0.199749	0.0773711	0.0351002	0.172279	0.0293575
8542	APOL1	0.243357	0.116536	2.08825	0.0367756	0.291273	32.3333	10.3448	0.110862	-0.531265	1.86375	-0.264896	3.30254	1.94245	0.648905	0.194734	-0.136903	0.488709	-0.110658	0.81921	0.296553	0.113333	0.0521133	0.0664054	0.0687584	0.174509	0.0615311	0.023308	0.0305037	0.0716166
55841	WWC3	0.159265	0.0763462	2.08609	0.0369701	0.292578	0	3.1544	0.789233	1.21989	1.67548	0.885673	-0.0540321	0.839798	-0.0645486	1.30922	0.251888	0.40817	0.372894	-0.00899406	0.118233	-0.0199568	0.244747	0.0426356	0.0593477	0.177265	0.0277082	0.0198212	0.0955888	0.034947
83746	L3MBTL2	-0.250262	0.119996	-2.08558	0.0370167	0.292712	40.7651	11.8174	0.0661697	-1.71539	-1.77303	0.365316	-2.17987	1.21514	-0.719884	-2.76144	-0.360063	-0.432712	0.152713	-0.398566	0.210376	-0.19724	-0.553066	0.0440586	0.0595614	0.174749	0.0334304	0.0299733	0.0750696	0.0401129
56172	ANKH	-0.384603	0.184472	-2.08489	0.0370797	0.292726	70.653	23.8525	0.00055591	-1.29768	0.373625	-2.54749	-4.71659	0.342154	-0.309202	-2.32263	-0.348467	0.0979013	-1.1474	-1.07334	0.0685403	-0.0554238	-0.568144	0.0721087	0.0686601	0.202862	0.0517865	0.040128	0.0321298	0.0598353
84934	RITA1	-0.276675	0.132714	-2.08474	0.0370928	0.292726	53.0508	14.9097	0.0209706	-2.22567	1.02489	-2.00654	-2.78338	0.822798	-1.26316	-2.55033	-0.467106	0.256232	-0.876829	-0.499267	0.16405	-0.264729	-0.489252	0.0440461	0.062505	0.190956	0.0321752	0.0397528	0.0439221	0.0368021
51018	RRP15	-0.22147	0.106255	-2.08433	0.0371301	0.292726	23.8752	9.19543	0.162882	0.394163	0.832926	-1.59229	-2.56702	-1.87492	-1.21525	-1.06662	0.0867311	0.190563	-0.683772	-0.552686	-0.338648	-0.267497	-0.221658	0.0484171	0.0523439	0.184406	0.046355	0.0326238	0.0484513	0.0431869
5832	ALDH18A1	-0.184199	0.0883766	-2.08425	0.0371375	0.292726	0	1.92412	0.926543	-1.16794	-1.40927	-1.0004	0.337568	-1.08121	-0.719807	-0.340879	-0.280666	-0.318032	-0.422209	0.114411	-0.182359	-0.171213	-0.0696777	0.0577478	0.0509279	0.178118	0.114872	0.0284469	0.0565775	0.0417817
64848	YTHDC2	-0.257837	0.123741	-2.08369	0.0371881	0.29289	41.9612	12.0609	0.060624	-0.456683	-0.212886	0.29503	-3.38423	-0.401185	-0.0782795	-3.49203	-0.142902	-0.0729035	0.123269	-0.587453	-0.0648737	-0.0159261	-0.653583	0.0979152	0.117274	0.174573	0.030132	0.0261485	0.0413925	0.0350303
253635	GPATCH11	0.179114	0.0859753	2.08332	0.0372222	0.292924	1.19076	7.08436	0.313116	0.148045	2.31777	-0.514657	1.82422	1.7866	-0.146058	0.362065	0.0356596	0.590537	-0.215451	0.397351	0.269072	-0.0233747	0.0733221	0.0580182	0.0649165	0.175252	0.0474455	0.0226821	0.0256118	0.0410107
10578	GNLY	0.278263	0.13362	2.0825	0.0372967	0.29327	0	6.51374	0.368161	-0.335198	-0.420557	0.890684	2.64182	0.760749	0.496872	1.54863	-0.112555	-0.164322	0.37504	0.84029	0.195777	0.189793	0.531585	0.112753	0.152665	0.1773	0.10117	0.0662277	0.145906	0.117829
51701	NLK	-0.430292	0.206714	-2.08158	0.037381	0.29327	77.8768	31.6409	1.91178e-05	1.43634	0.141799	-2.4551	-1.91707	-3.00388	-1.1666	-6.34787	0.436259	0.0524331	-1.09937	-0.29519	-0.569494	-0.246376	-1.27624	0.0922521	0.136731	0.200517	0.0237097	0.035943	0.0446018	0.040421
10773	ZBTB6	-0.28887	0.138776	-2.08155	0.0373837	0.29327	51.3694	14.3942	0.0255295	-0.0668465	-1.61541	-0.176522	-4.48496	-0.860215	-1.56077	0.204376	-0.0172716	-0.457961	-0.0737095	-0.994101	-0.153757	-0.268939	0.049356	0.0667586	0.0803697	0.174361	0.0491297	0.0319487	0.0296914	0.0583203
10982	MAPRE2	-0.212968	0.102313	-2.08153	0.0373854	0.29327	16.549	8.38816	0.211022	-0.678353	-1.14972	-1.8144	-2.54102	0.696247	-0.294663	-1.25456	-0.127886	-0.272714	-0.786022	-0.537419	0.1149	-0.104206	-0.251943	0.0355414	0.0562644	0.187674	0.0447312	0.0272342	0.125066	0.040329
3480	IGF1R	0.3104	0.149177	2.08075	0.0374572	0.293365	57.324	16.4026	0.0117485	-0.342177	-0.267297	2.30116	0.789321	1.87715	0.536089	4.53256	-0.0890315	-0.0988736	1.02113	0.181268	0.297974	0.102022	0.892867	0.0676996	0.136828	0.19691	0.0527392	0.0251976	0.0362174	0.038805
10467	ZNHIT1	-0.332945	0.160119	-2.07936	0.0375844	0.29404	70.9236	24.0745	0.000506036	-1.87487	-0.77181	-1.04145	-6.62848	0.517444	-0.0541769	-2.20072	-0.342002	-0.170475	-0.439944	-0.861343	0.0861711	-0.0166834	-0.508784	0.0332748	0.0487865	0.17845	0.0168859	0.027733	0.0948287	0.0534485
58477	SRPRB	-0.286453	0.137774	-2.07915	0.0376032	0.29404	59.1823	17.1494	0.00874956	-0.255582	-4.16552	-0.888907	-3.32293	-0.277364	-0.404741	0.0263846	-0.049582	-0.777681	-0.374279	-0.66612	-0.0409936	-0.123975	0.00531158	0.0376345	0.0348551	0.177288	0.0401848	0.0218441	0.0938233	0.0405272
51495	HACD3	-0.33979	0.163492	-2.07833	0.0376789	0.294398	60.0656	17.5287	0.00752439	-0.474579	-2.25158	-2.08688	-4.45374	-0.273351	-0.0947057	0.157177	-0.120515	-0.686548	-0.915527	-0.884528	-0.054207	-0.0233193	0.0370342	0.0644854	0.092975	0.192464	0.0394433	0.039325	0.0606286	0.0555173
230	ALDOC	0.190203	0.0915335	2.07796	0.0377131	0.294432	0	4.43149	0.618495	0.152536	1.73279	-0.0220618	-0.165775	1.96512	1.30379	0.366139	0.0354155	0.451471	-0.00920915	-0.0396636	0.397809	0.37307	0.0714628	0.0539068	0.0678842	0.174244	0.0572461	0.04098	0.0818773	0.0380951
25793	FBXO7	-0.273537	0.131735	-2.07641	0.037856	0.294818	40.3411	11.7334	0.0681884	-1.52508	-0.74021	-0.0741978	0.805481	-1.77611	-0.47316	-4.19298	-0.443977	-0.320248	-0.0309737	0.186158	-0.201056	-0.201035	-0.711245	0.0847495	0.187182	0.174263	0.0534138	0.0128143	0.180522	0.0287735
84128	WDR75	-0.171428	0.0825622	-2.07635	0.0378618	0.294818	1.41699	7.10062	0.311643	1.4709	-1.55362	-0.640021	-2.17036	-1.46254	-0.801777	-0.684475	0.281866	-0.337265	-0.268357	-0.28324	-0.210214	-0.252447	-0.170447	0.0367215	0.0471248	0.175808	0.0170313	0.020659	0.0991367	0.0620105
4756	NEO1	-0.198142	0.0954401	-2.07609	0.0378857	0.294818	0	6.82578	0.33726	-0.684304	-0.213436	0.97166	-2.33804	-0.0476604	-0.429493	-2.26654	-0.197345	-0.0626054	0.409821	-0.575381	-0.0104887	-0.0842249	-0.372526	0.0831678	0.0860377	0.177894	0.0605629	0.0484318	0.0384564	0.0270139
1606	DGKA	-0.234849	0.113137	-2.07579	0.037913	0.294818	22.6394	9.04853	0.170867	-1.64398	-1.9689	-1.08481	-2.53485	0.159324	-0.782295	0.93578	-0.306623	-0.411086	-0.458733	-0.664698	0.0363603	-0.212063	0.216709	0.0347872	0.043593	0.178817	0.0687615	0.0520825	0.0734834	0.0536299
11343	MGLL	-0.20356	0.0980714	-2.07563	0.037928	0.294818	15.3433	8.26869	0.219072	0.254521	-1.26412	-1.45724	0.872659	-0.626323	-2.24562	-2.21084	0.0662086	-0.385392	-0.622834	0.179571	-0.113809	-0.377687	-0.386551	0.0676678	0.0929455	0.182676	0.0423433	0.0330184	0.0282872	0.0305703
84900	RNFT2	-0.197514	0.0951654	-2.07548	0.0379424	0.294818	0	6.38493	0.381479	-1.38009	-0.104987	-1.82581	-1.27734	-0.775343	0.641794	-1.72331	-0.349197	-0.0320835	-0.791352	-0.384893	-0.160183	0.119972	-0.347462	0.0640216	0.0933893	0.187856	0.0907954	0.0426819	0.0349437	0.0406524
10788	IQGAP2	0.211941	0.102166	2.07446	0.0380361	0.295313	16.0549	8.33879	0.214319	0.811429	2.55837	0.95614	1.96544	1.39513	-0.53562	-0.562578	0.152783	0.646986	0.403142	0.455452	0.214902	-0.162878	-0.118777	0.0354529	0.0639532	0.177776	0.0536987	0.0237273	0.0924724	0.0445757
642	BLMH	-0.324464	0.156451	-2.0739	0.038089	0.29549	62.8295	18.8321	0.0044567	-0.883531	-1.20828	-2.22889	-4.86102	-1.11501	-0.281557	0.683602	-0.188906	-0.335865	-0.985108	-0.938204	-0.183469	-0.0647117	0.165824	0.0457137	0.0772674	0.195339	0.0372512	0.0270751	0.0528243	0.0588423
266747	RGL4	0.228916	0.11045	2.07258	0.0382112	0.296204	0	3.95601	0.682629	0.919595	1.20303	1.96051	0.876679	-0.0774573	0.43753	1.07195	0.224991	0.396241	0.854857	0.484024	-0.0160776	0.173266	0.253207	0.0598601	0.108484	0.190129	0.304826	0.043084	0.156824	0.055796
5532	PPP3CB	-0.405655	0.195792	-2.07187	0.0382777	0.296487	80.4744	35.8505	2.94738e-06	0.607646	0.138167	-1.87123	-6.91279	-1.77119	-0.424453	-3.52089	0.105483	0.0267473	-0.812637	-1.05724	-0.315535	-0.142205	-0.721287	0.0301344	0.0374756	0.188598	0.0233907	0.0317371	0.112246	0.0419673
54749	EPDR1	-0.296005	0.142912	-2.07124	0.038336	0.296567	52.3439	14.6886	0.0228223	-0.198781	-1.43947	0.878621	-4.07452	-0.54399	-0.511478	-2.66172	-0.050676	-0.469705	0.369874	-0.954143	-0.102411	-0.10375	-0.495045	0.0649909	0.106475	0.177216	0.0548369	0.0354416	0.0411455	0.034591
5580	PRKCD	0.206225	0.0995819	2.07091	0.0383672	0.296567	0	6.64928	0.354502	0.860773	0.423158	2.86332	0.885204	0.789095	-0.181161	0.883428	0.187695	0.0951697	1.31847	0.195946	0.175615	-0.0673503	0.195412	0.0475474	0.0505817	0.212033	0.0489988	0.0495298	0.138213	0.0489283
710	SERPING1	0.337602	0.163031	2.07079	0.0383786	0.296567	65.1758	20.101	0.00265706	0.64057	0.851115	0.956607	5.65453	1.50176	0.851994	-0.180464	0.142013	0.199329	0.403342	1.13667	0.322501	0.1761	-0.0426444	0.0491499	0.0548486	0.177779	0.0404092	0.0461171	0.0427215	0.0558395
79807	GSTCD	-0.186722	0.0902	-2.07009	0.0384443	0.296714	11.5943	7.91804	0.24417	-2.5897	-1.46871	-0.808289	-1.85901	-0.497569	0.189133	0.662587	-0.455292	-0.286289	-0.339821	-0.376294	-0.103109	0.0396993	0.116076	0.0309087	0.0379958	0.176753	0.0409722	0.0429423	0.0440586	0.0306903
126328	NDUFA11	-0.310901	0.150219	-2.06966	0.0384841	0.296714	63.7394	19.3047	0.00367881	-2.78026	-2.63214	-1.70141	-2.49528	1.70721	-0.0902285	-1.4043	-0.589551	-0.724251	-0.73367	-0.412047	0.264332	-0.0276295	-0.250148	0.0449645	0.0757114	0.185944	0.0272681	0.0239732	0.093769	0.0317301
117608	ZNF354B	-0.320622	0.154918	-2.06962	0.038488	0.296714	69.8602	23.2251	0.000724487	0.746769	-0.317303	-0.923327	-4.72351	0.029285	-2.39982	-3.06722	0.147663	-0.0603175	-0.38904	-1.01867	0.00554653	-0.383824	-0.617107	0.0390997	0.0361359	0.177533	0.0465091	0.0358719	0.0255804	0.040479
339665	SLC35E4	0.304759	0.14729	2.0691	0.0385369	0.296773	60.3576	17.6578	0.00714666	1.81864	0.144048	2.4557	3.81769	-0.662452	0.33924	1.27961	0.402131	0.0354582	1.09968	0.967669	-0.136305	0.0576045	0.228636	0.0488925	0.0605929	0.200532	0.0642469	0.0423368	0.0288336	0.0319254
4232	MEST	-0.287308	0.138871	-2.06889	0.0385561	0.296773	55.8083	15.8401	0.0146385	-1.73658	0.251978	-2.90219	-2.9278	-1.77064	-0.309869	0.408266	-0.33097	0.058594	-1.34035	-0.831886	-0.340069	-0.0493161	0.0890931	0.0363234	0.0540732	0.213298	0.080732	0.0368869	0.0253292	0.0476213
25972	UNC50	-0.182534	0.0882774	-2.06773	0.0386653	0.297267	5.09672	7.37593	0.287475	-0.100343	0.795851	0.174561	-1.60936	-3.04434	-0.471588	-1.08871	-0.0182286	0.169545	0.0728901	-0.306132	-0.424481	-0.158622	-0.230905	0.0330018	0.0453845	0.174358	0.0361833	0.0194416	0.113136	0.0449821
51162	EGFL7	-0.184858	0.0894085	-2.06757	0.0386807	0.297267	0	6.46103	0.373572	-0.6087	0.328773	-1.20959	-0.652699	-2.67227	0.507911	-1.2089	-0.150626	0.085564	-0.513138	-0.15009	-0.488743	0.10656	-0.227333	0.0612337	0.0677314	0.179967	0.0528782	0.0334503	0.0440161	0.0353626
10927	SPIN1	-0.39157	0.189495	-2.06639	0.0387914	0.297886	73.8606	26.7795	0.000159247	0.436069	-0.524631	-1.50945	-7.14861	-2.05227	-0.81136	-1.11181	0.131728	-0.185035	-0.646291	-1.17786	-0.333042	-0.1826	-0.235777	0.0912525	0.124395	0.183323	0.0271486	0.0263347	0.0506495	0.0449721
4599	MX1	0.237946	0.115208	2.06536	0.0388891	0.298202	0	3.67194	0.720971	1.09275	0.0977172	1.33977	-0.662044	1.30518	0.26733	1.65099	0.318741	0.0306979	0.570492	-0.22648	0.317595	0.105287	0.411979	0.0850822	0.0986907	0.181318	0.117027	0.0592114	0.155115	0.0622674
55011	PIH1D1	-0.366028	0.177226	-2.06531	0.0388933	0.298202	67.399	21.4717	0.00150876	-3.5553	-2.86219	-3.40926	1.39957	-0.754619	-0.217563	-1.0528	-0.724742	-0.644802	-1.6462	0.445689	-0.139627	-0.055879	-0.22635	0.0415541	0.0507524	0.233155	0.101408	0.034236	0.0659669	0.046224
9656	MDC1	-0.370595	0.179539	-2.06415	0.0390038	0.298251	78.479	32.5264	1.29318e-05	0.0531822	-1.87348	-1.21877	-7.34484	-1.58211	-0.522483	-0.713593	0.0104308	-0.484346	-0.517161	-1.13208	-0.240777	-0.132389	-0.114121	0.0384683	0.0668362	0.180057	0.0237567	0.0231609	0.0642036	0.0255761
11201	POLI	-0.230625	0.11174	-2.06395	0.0390227	0.298251	40.033	11.6731	0.0696722	-2.69021	0.349558	-0.252449	-3.44805	-1.65643	0.279439	-0.151329	-0.493801	0.0876485	-0.105451	-0.587028	-0.314088	0.0473918	-0.034935	0.0336925	0.0628712	0.174484	0.0289849	0.0359547	0.0287628	0.0532934
10939	AFG3L2	-0.299473	0.1451	-2.06391	0.0390263	0.298251	63.4221	19.1373	0.003938	-1.55887	-1.3862	-2.32309	-4.70724	1.01021	-0.109806	-0.989969	-0.265056	-0.301867	-1.03215	-0.772421	0.189525	-0.029397	-0.197884	0.0289106	0.0474221	0.197402	0.0269262	0.0351973	0.071673	0.0399557
23382	AHCYL2	-0.362465	0.175637	-2.06371	0.039045	0.298251	73.4293	26.3448	0.000192004	-0.931329	-1.63817	-0.873646	-6.27857	-2.43278	-0.413035	0.68534	-0.217353	-0.451022	-0.367744	-1.12297	-0.367007	-0.101075	0.129777	0.0544659	0.0758016	0.177182	0.0319899	0.0227585	0.0598839	0.0358579
126792	B3GALT6	-0.178497	0.0864997	-2.06355	0.03906	0.298251	0	4.04096	0.671133	-1.03523	-2.04656	-0.601681	-1.0442	0.17454	-0.125495	-1.24117	-0.23609	-0.523272	-0.25215	-0.232247	0.0285779	-0.0332145	-0.26681	0.0520089	0.0653742	0.175625	0.0494687	0.0268083	0.0700488	0.0462103
55758	RCOR3	-0.380397	0.184432	-2.06254	0.0391566	0.298251	79.1318	33.5438	8.23892e-06	-0.14538	0.0287381	-1.84976	-1.12224	-1.20778	-1.30001	-6.76162	-0.0257581	0.0052281	-0.802558	-0.221719	-0.169671	-0.427075	-1.21946	0.0313922	0.0330958	0.188245	0.0390336	0.019735	0.107923	0.0325263
255631	COL24A1	-0.496008	0.240488	-2.06251	0.0391594	0.298251	77.6043	31.256	2.26496e-05	-0.49824	-1.03954	-1.50817	-5.54034	-2.69432	0.920284	-0.716065	-0.163854	-0.403943	-0.64571	-1.8277	-0.659346	0.172496	-0.145502	0.108152	0.150993	0.183306	0.108827	0.0598863	0.0351328	0.0412887
5230	PGK1	0.171773	0.0832956	2.06221	0.0391881	0.298251	0	1.92178	0.92675	1.41064	1.5639	0.801391	0.606328	0.812538	0.244612	0.0942086	0.257519	0.409664	0.336879	0.135179	0.12348	0.0954487	0.0192686	0.0333265	0.0686177	0.17671	0.0497052	0.0230942	0.15226	0.0418329
1537	CYC1	-0.289322	0.140309	-2.06203	0.0392049	0.298251	51.6495	14.4776	0.024733	-2.88336	-2.71347	-2.6328	-0.855796	0.577159	-0.0319186	-0.153043	-0.544386	-0.591178	-1.19251	-0.211906	0.118159	-0.0103687	-0.0279054	0.0356465	0.0474663	0.205157	0.0613121	0.0419124	0.105527	0.033247
96459	FNIP1	0.224149	0.108715	2.06181	0.0392255	0.298251	28.6864	9.8158	0.132627	0.0108479	2.27996	2.49243	1.65796	1.33588	-0.537285	0.285462	0.00219405	0.479587	1.11868	0.350028	0.256154	-0.14123	0.0524377	0.040907	0.0442467	0.201448	0.0445718	0.036768	0.0690944	0.0337435
5062	PAK2	0.2817	0.136679	2.06103	0.0392998	0.298342	47.798	13.4095	0.0369755	0.0630204	1.36867	2.02877	3.85548	1.87073	-0.568647	-0.162485	0.0167672	0.325031	0.88749	0.800254	0.284323	-0.182676	-0.0351608	0.0707875	0.056396	0.191365	0.0430823	0.0230994	0.1032	0.0468265
3101	HK3	0.236096	0.114556	2.06097	0.0393058	0.298342	0	3.13424	0.79182	0.772462	0.51613	2.17207	0.857144	0.88334	0.430095	0.317671	0.209029	0.153174	0.957079	0.328092	0.194717	0.162672	0.0930899	0.0732248	0.0880744	0.194155	0.146516	0.0485907	0.143053	0.0858718
54991	C1orf159	-0.194861	0.0945898	-2.06006	0.0393924	0.298768	4.16253	7.30403	0.293643	-0.158376	-1.4988	-0.669837	-1.51231	1.03698	-1.17074	-2.26586	-0.0399625	-0.512148	-0.280979	-0.289662	0.188841	-0.257195	-0.385965	0.0636688	0.116763	0.175959	0.036686	0.0331631	0.0482614	0.0290156
55658	RNF126	-0.366454	0.177937	-2.05946	0.03945	0.298975	76.774	30.1387	3.69923e-05	-4.23772	-3.42781	-3.16391	1.65993	-1.05162	-0.148242	-1.09834	-0.677001	-0.755607	-1.49311	0.273898	-0.189394	-0.0339312	-0.234632	0.025522	0.0485912	0.222707	0.0272268	0.0324352	0.0523908	0.0456349
9373	PLAA	-0.29283	0.142266	-2.05833	0.0395587	0.299372	61.5451	18.2031	0.00574412	-1.17746	1.62765	-2.0455	-3.86655	-1.84266	-0.00195515	-2.51127	-0.308749	0.419568	-0.895539	-0.638233	-0.270226	-0.000345534	-0.576286	0.0687571	0.0664482	0.191677	0.0272466	0.0215062	0.0312334	0.0526611
1938	EEF2	-0.38419	0.186679	-2.05803	0.0395875	0.299372	75.1856	28.2094	8.58023e-05	-1.68898	-3.89923	-2.10375	-5.27614	0.0267734	-0.0532886	0.948752	-0.307524	-0.772224	-0.923714	-0.956343	0.00463248	-0.0204924	0.220142	0.0331518	0.039222	0.192791	0.0328545	0.0299378	0.147882	0.0538395
2994	GYPB	-0.260433	0.126552	-2.05791	0.0395984	0.299372	0	1.29522	0.97192	-0.878154	-0.794517	-0.903884	0.397735	-1.66575	-0.0623957	-0.611573	-0.310254	-0.286263	-0.380698	0.219753	-0.346349	-0.0316923	-0.186051	0.124823	0.129815	0.177393	0.305267	0.0432324	0.257987	0.0925478
5552	SRGN	0.267783	0.130142	2.05762	0.0396266	0.299372	27.7257	9.68533	0.138544	0.0743583	0.320774	2.90446	1.99315	1.89779	-0.0405766	0.225653	0.0174445	0.0965666	1.34164	0.552246	0.342609	-0.021054	0.0437036	0.0550372	0.0906266	0.213373	0.0767691	0.0325912	0.269226	0.0375106
116844	LRG1	0.298658	0.145175	2.05723	0.0396638	0.299372	25.9751	9.45628	0.149497	0.471651	1.60569	2.57941	1.36886	1.39569	0.844894	-0.917051	0.118019	0.542958	1.16419	0.503344	0.310426	0.332915	-0.225558	0.0626124	0.114343	0.203706	0.135211	0.0494699	0.155261	0.0604962
122618	PLD4	-0.257211	0.125041	-2.05701	0.0396849	0.299372	36.8196	11.0794	0.0859534	-1.02561	-1.70899	-0.319989	-1.19158	-0.536732	0.77285	-3.33861	-0.271634	-0.471601	-0.13372	-0.330896	-0.109115	0.128662	-0.712612	0.0701469	0.0761498	0.174631	0.0771148	0.0413287	0.0277148	0.0455592
4940	OAS3	0.295973	0.144065	2.05444	0.039933	0.301013	49.6016	13.8893	0.0308972	2.50335	3.31165	-0.188182	-0.526021	0.910634	-0.578256	2.93395	0.559094	0.661105	-0.0785819	-0.165298	0.22121	-0.128099	0.663428	0.04988	0.0398522	0.174377	0.0987474	0.0590096	0.049074	0.0511308
140465	MYL6B	-0.396673	0.193135	-2.05386	0.0399889	0.301203	77.8698	31.631	1.92016e-05	-2.63883	-1.6378	-1.72923	-6.30859	-1.05847	0.84056	0.0956828	-0.59145	-0.421506	-0.746494	-1.16135	-0.178175	0.199156	0.0178	0.0502359	0.066235	0.186357	0.033889	0.0283363	0.056137	0.0346076
57468	SLC12A5	-0.240028	0.116904	-2.05321	0.0400526	0.301209	47.3915	13.3058	0.0384283	-1.07594	-1.40745	0.177108	-0.587931	0.0365548	-0.731909	-4.36546	-0.207041	-0.312077	0.0739541	-0.137254	0.00593872	-0.119709	-0.824866	0.0370284	0.049165	0.174361	0.0544999	0.0263935	0.0267508	0.0357032
10475	TRIM38	0.246912	0.120274	2.05291	0.0400816	0.301209	46.9544	13.1962	0.0400242	-0.336873	-0.264183	1.60286	4.07767	2.91075	-0.894376	1.54709	-0.0735547	-0.0702527	0.688577	0.553375	0.429906	-0.291805	0.285918	0.0476746	0.0707161	0.18455	0.0184169	0.0218141	0.10645	0.0341549
9221	NOLC1	-0.328763	0.160335	-2.05048	0.040318	0.302477	62.4747	18.6541	0.00478957	-0.250785	-0.875063	-3.08744	-4.06444	-0.296686	0.574637	-1.65448	-0.0667347	-0.290659	-1.44744	-0.699562	-0.0526401	0.11335	-0.405352	0.0708107	0.110329	0.219788	0.0296245	0.0314804	0.0389096	0.060026
6596	HLTF	-0.181128	0.0883355	-2.05046	0.0403198	0.302477	0	4.85181	0.562955	0.858664	-1.39991	-1.48703	-1.7369	-0.572886	-0.648615	-0.618198	0.227682	-0.44083	-0.636199	-0.301592	-0.115787	-0.129041	-0.157175	0.0703088	0.0991607	0.183041	0.0301504	0.0408491	0.0395804	0.0646417
26130	GAPVD1	-0.272305	0.132834	-2.04996	0.0403681	0.302477	48.0484	13.4741	0.0360958	-0.584013	1.1013	-2.75058	-2.98513	-1.39027	-0.548142	-1.36348	-0.105439	0.238014	-1.25609	-0.555473	-0.236146	-0.198579	-0.354165	0.0325953	0.0467078	0.208541	0.0346259	0.028851	0.131244	0.0674705
51690	LSM7	-0.425081	0.207372	-2.04985	0.0403787	0.302477	80.3053	35.5426	3.38237e-06	-2.61758	-1.79298	-2.3784	-7.43398	-0.1289	0.0738187	0.343843	-0.532248	-0.461461	-1.06012	-1.0994	-0.020934	0.0246054	0.0787272	0.0413456	0.0662403	0.198674	0.0218708	0.0263755	0.111104	0.0524239
51763	INPP5K	-0.170249	0.0830712	-2.04943	0.0404202	0.302477	0	5.23336	0.514251	-1.24089	-0.750326	-1.0721	-1.69499	1.11614	-0.70651	-1.25035	-0.37496	-0.279105	-0.453219	-0.259145	0.230976	-0.137544	-0.233727	0.0913063	0.138368	0.178708	0.0233749	0.0428247	0.0379005	0.0349424
522	ATP5PF	-0.309611	0.151232	-2.04726	0.0406327	0.3034	64.5552	19.749	0.00306903	-1.28439	-3.00272	-2.91559	-0.40341	0.992167	-0.101308	-2.50803	-0.288655	-0.783783	-1.34794	-0.0683622	0.139473	-0.0341509	-0.423175	0.0505086	0.0681338	0.213741	0.028717	0.019761	0.113635	0.0284692
2882	GPX7	-0.230034	0.112391	-2.04674	0.0406841	0.3034	18.6411	8.60385	0.197113	-2.18293	-1.80548	-2.15539	-0.979914	0.279729	-0.526133	0.368594	-0.470713	-0.418123	-0.9489	-0.256209	0.0569348	-0.142874	0.0824206	0.0464978	0.053632	0.193817	0.0683619	0.0414267	0.0737419	0.0500007
56833	SLAMF8	0.27018	0.132034	2.04628	0.0407285	0.3034	32.879	10.4289	0.107713	0.666883	-0.846729	1.01001	1.96663	1.29732	-0.165022	3.19691	0.203973	-0.287193	0.426356	0.573302	0.27207	-0.031034	0.707077	0.0935505	0.115043	0.178194	0.0849809	0.0439816	0.0353665	0.0489185
30845	EHD3	-0.257104	0.12567	-2.04587	0.040769	0.3034	34.7905	10.7346	0.0969327	-1.02549	0.0724047	-3.52871	-1.22295	-1.19516	-0.83661	-0.295331	-0.280995	0.0221477	-1.72479	-0.308652	-0.188508	-0.152121	-0.078734	0.0750813	0.0935669	0.238914	0.063697	0.0248774	0.0330623	0.0710734
90139	TSPAN18	-0.259401	0.126794	-2.04585	0.0407712	0.3034	34.0707	10.6174	0.100944	-1.26633	-0.463325	-3.0732	-2.12738	-0.439529	0.0207771	-0.479938	-0.365152	-0.132146	-1.43903	-0.534143	-0.0791725	0.0048193	-0.0965432	0.0831483	0.0813466	0.21926	0.0630415	0.032447	0.0538019	0.0404644
5955	RCN2	-0.238621	0.116638	-2.04582	0.0407741	0.3034	36.7709	11.0709	0.0862112	-0.913673	-0.404465	-0.99457	-3.61977	0.0317301	0.601588	-2.16447	-0.181633	-0.0796485	-0.419694	-0.654256	0.00734901	0.144843	-0.48849	0.0395193	0.0387787	0.178072	0.0326689	0.0536432	0.0579693	0.0509339
81894	SLC25A28	-0.209435	0.102409	-2.04508	0.0408469	0.303712	30.5339	10.0769	0.121453	-1.28614	-0.96931	-0.400137	-3.85699	-1.34965	-0.075291	1.06665	-0.227341	-0.19382	-0.167318	-0.55392	-0.222511	-0.0263997	0.226361	0.0312449	0.0399829	0.174851	0.0206251	0.0271807	0.122945	0.0450359
51552	RAB14	0.164473	0.0804971	2.04322	0.0410304	0.304846	0	6.38623	0.381342	0.868764	1.5383	1.80214	-0.571992	0.260808	0.663889	1.88995	0.193414	0.429666	0.780306	-0.118954	0.0407713	0.118113	0.329209	0.0495647	0.0780154	0.187479	0.0432493	0.0244381	0.0316521	0.030342
121642	ALKBH2	-0.330173	0.161622	-2.04287	0.0410648	0.304872	68.2835	22.0705	0.00117574	-2.49092	-1.74677	-1.70834	-4.73479	0.462375	-0.202086	0.29464	-0.572158	-0.496536	-0.736859	-0.838639	0.0800315	-0.0434963	0.0543586	0.052761	0.0808035	0.186046	0.0313725	0.0299594	0.0463267	0.0340372
10562	OLFM4	0.337164	0.165135	2.04175	0.041176	0.305466	0	2.8869	0.822902	2.17554	0.576893	0.91403	0.86322	0.601964	0.0668345	0.206057	0.933313	0.255217	0.38505	0.502023	0.206861	0.0316252	0.0960483	0.184044	0.195717	0.177466	0.338224	0.118091	0.223905	0.217273
80209	PROSER1	-0.292013	0.143063	-2.04114	0.0412365	0.305547	59.5283	17.296	0.00825467	0.730946	-1.3874	-2.50985	-3.4524	0.183447	-0.616672	-1.86287	0.136705	-0.317269	-1.12773	-0.770319	0.0285497	-0.148841	-0.393907	0.0349781	0.0522942	0.20189	0.0497851	0.0242203	0.0582555	0.0447117
9402	GRAP2	-0.276707	0.135629	-2.04018	0.041332	0.305931	32.8164	10.4192	0.108073	-2.34192	-0.0597579	-1.50572	1.25609	-0.643763	-1.24294	-2.68294	-0.684892	-0.0202024	-0.644611	0.369461	-0.133969	-0.298513	-0.562212	0.0855266	0.114292	0.183276	0.0865155	0.043307	0.0576801	0.0439114
7133	TNFRSF1B	0.270254	0.132519	2.03936	0.0414137	0.306306	30.2851	10.0409	0.12294	0.12067	1.66632	3.0331	-0.525911	1.61696	0.547468	1.12264	0.0314982	0.500298	1.41552	-0.132261	0.29872	0.191331	0.252928	0.0681355	0.0901445	0.217801	0.0632466	0.0341296	0.122139	0.0507591
25897	RNF19A	-0.268303	0.131604	-2.03871	0.0414789	0.306557	27.7873	9.69359	0.138163	-1.52636	-0.852002	-0.999298	0.631843	0.0665594	-0.947578	-3.29206	-0.380811	-0.237473	-0.421733	0.181313	0.0140338	-0.265922	-0.855465	0.0622455	0.077687	0.178109	0.0823452	0.0444561	0.0787553	0.0675258
5693	PSMB5	-0.222787	0.109319	-2.03795	0.0415554	0.306892	38.2396	11.3341	0.0785827	-1.49339	-0.509652	-2.62144	-3.15098	-0.515497	0.502937	-0.208148	-0.289008	-0.107602	-1.18646	-0.495965	-0.0841008	0.135352	-0.0404532	0.0374518	0.0445755	0.204844	0.0247748	0.0266163	0.0724273	0.0377712
9183	ZW10	-0.251627	0.123584	-2.03607	0.0417431	0.307401	48.7046	13.6465	0.0338446	0.365514	-0.33672	-2.50613	-3.42108	0.135038	-1.05792	-1.68638	0.0710419	-0.0650806	-1.12579	-0.5949	0.0258253	-0.254923	-0.3516	0.0377765	0.0373564	0.201795	0.0302386	0.0365746	0.0580644	0.04347
160140	C11orf65	0.180801	0.0888063	2.0359	0.0417605	0.307401	0	5.96348	0.427294	0.0912894	0.553058	1.12127	2.64288	0.0755884	0.610456	1.08338	0.023793	0.162123	0.474573	0.873424	0.0185051	0.0973893	0.198707	0.0679292	0.0859306	0.179138	0.109218	0.0599342	0.0254515	0.0336409
200205	IBA57	-0.333025	0.163592	-2.03571	0.0417794	0.307401	48.531	13.6004	0.0344324	-1.16586	-0.567878	-2.27478	-3.60946	-0.454377	-1.5757	1.26466	-0.394842	-0.203507	-1.00793	-0.736967	-0.118048	-0.394522	0.329671	0.114698	0.128425	0.196328	0.041688	0.0674964	0.0626893	0.0679537
51614	ERGIC3	-0.291261	0.143096	-2.03542	0.0418086	0.307401	56.1287	15.9558	0.0139934	-2.6757	-1.98242	-2.37367	-3.30561	1.06325	0.302574	-0.186971	-0.475493	-0.395852	-1.05772	-0.633949	0.240393	0.0982022	-0.0385362	0.0315801	0.0398725	0.198564	0.0367795	0.0511182	0.105337	0.0424803
1428	CRYM	-0.354012	0.173941	-2.03524	0.0418265	0.307401	69.6576	23.0701	0.000773353	-1.53009	0.102491	-1.86077	-0.969002	-3.14755	1.34192	-3.84561	-0.332253	0.0256714	-0.807725	-0.220317	-0.694967	0.220755	-0.924111	0.0471523	0.0627378	0.188425	0.0516948	0.0487508	0.0270625	0.0577454
11319	ECD	0.223907	0.110025	2.03505	0.0418463	0.307401	47.1475	13.2444	0.0393148	2.26488	2.25625	-0.167138	2.44535	-1.27913	0.527278	1.68022	0.431069	0.48552	-0.0697886	0.404896	-0.17664	0.102981	0.315198	0.0362245	0.0463063	0.174348	0.027416	0.0190698	0.0381446	0.0351913
3190	HNRNPK	-0.228238	0.11216	-2.03493	0.0418575	0.307401	37.3146	11.1669	0.0833538	0.891911	-0.59608	-2.55857	-1.0612	-3.47634	-0.578218	-0.852687	0.1699	-0.155093	-1.15321	-0.206133	-0.411528	-0.221684	-0.157961	0.0362864	0.0676982	0.203153	0.0377313	0.0140138	0.146989	0.0343179
27239	GPR162	0.200524	0.0985917	2.03388	0.0419637	0.307401	0	6.44136	0.375604	1.69242	0.294564	1.29565	1.18808	-0.694859	0.141635	2.06937	0.394047	0.0799173	0.550982	0.241956	-0.144371	0.0394714	0.554033	0.0542103	0.0736075	0.180842	0.0414742	0.0431681	0.0776646	0.0716796
2957	GTF2A1	-0.30424	0.149652	-2.03299	0.0420539	0.307401	65.1556	20.0893	0.00266982	-1.26064	-1.80863	-1.82714	1.03601	-1.4489	0.118951	-4.43765	-0.270921	-0.379037	-0.791972	0.225847	-0.275955	0.0189714	-0.930441	0.0461856	0.0439199	0.187878	0.0475224	0.0362743	0.0254368	0.0439615
8553	BHLHE40	0.186636	0.0918064	2.03293	0.0420596	0.307401	0	3.79224	0.704768	0.672816	0.461171	2.11026	0.549718	1.51092	0.351482	0.312848	0.139463	0.103627	0.92688	0.168159	0.292519	0.157893	0.0590571	0.042966	0.0504919	0.192919	0.0935757	0.0374825	0.201799	0.035635
6919	TCEA2	-0.156591	0.0770275	-2.03293	0.0420598	0.307401	0	4.98023	0.546352	-2.45264	-0.422873	-0.35424	-1.57968	-0.016833	0.242211	-0.48882	-0.429082	-0.0903627	-0.14807	-0.319593	-0.00306052	0.0522546	-0.086305	0.0306064	0.0456623	0.174719	0.0409315	0.0330574	0.0465439	0.0311727
375449	MAST4	-0.41342	0.203395	-2.0326	0.0420931	0.307401	75.2399	28.2713	8.3526e-05	-2.37424	-0.580028	-2.37608	-4.35045	-0.132684	1.72542	-2.65955	-0.658787	-0.218211	-1.05894	-1.00714	-0.0248229	0.329036	-0.525272	0.0769913	0.141533	0.19862	0.053594	0.0350001	0.036366	0.039008
7180	CRISP2	0.371877	0.183078	2.03125	0.0422294	0.30794	57.5118	16.4752	0.0114185	1.45595	1.68833	2.86031	1.27008	0.0130123	-1.21865	2.25322	0.516086	0.605866	1.31679	0.344786	0.00335484	-0.22352	0.641323	0.125646	0.128777	0.211937	0.0736948	0.0664717	0.0336416	0.0810113
10771	ZMYND11	0.262415	0.129266	2.03003	0.042353	0.308366	49.2974	13.806	0.0318799	1.13059	1.82133	-1.38105	2.0025	1.24454	-0.646687	3.85892	0.222692	0.364829	-0.588818	0.543212	0.186969	-0.191974	0.721918	0.0387971	0.0401237	0.18178	0.0735856	0.0225695	0.0881241	0.0349982
8890	EIF2B4	-0.247909	0.122137	-2.02975	0.0423819	0.308366	55.4775	15.7224	0.0153241	-1.63659	-2.172	-1.88834	-3.64467	1.38929	-0.564651	-0.455644	-0.255193	-0.40087	-0.820688	-0.55803	0.227225	-0.160598	-0.0881448	0.0243141	0.0340634	0.188884	0.0234422	0.0267503	0.0808944	0.0374234
80216	ALPK1	0.513512	0.253143	2.02855	0.0425044	0.308578	85.3227	47.6926	1.36106e-08	2.52693	2.86612	3.4779	7.25705	1.08889	-0.59466	-1.57894	0.51744	0.720361	1.69101	1.27713	0.194102	-0.202764	-0.35957	0.041931	0.06317	0.236406	0.0309708	0.0317756	0.116263	0.0518607
286257	PAXX	-0.394921	0.194682	-2.02854	0.0425051	0.308578	77.3744	30.9383	2.60457e-05	-2.58534	-2.33673	-1.4053	-5.93916	0.0825187	-0.438482	0.762739	-0.554009	-0.59128	-0.599618	-1.07574	0.013571	-0.151427	0.134908	0.0459196	0.0640281	0.182059	0.0328069	0.0270469	0.119262	0.0312842
7508	XPC	0.20662	0.10188	2.02808	0.042552	0.308691	25.8564	9.44114	0.150246	-0.227332	0.25406	1.48471	0.524849	2.55023	-0.47848	2.70325	-0.0438052	0.052969	0.635158	0.085006	0.444315	-0.159033	0.507937	0.0371304	0.0434682	0.183013	0.026232	0.0303545	0.110471	0.0353058
2734	GLG1	-0.305654	0.150738	-2.02771	0.0425897	0.308716	66.1729	20.6934	0.00208232	-1.72713	-2.08269	-2.08874	-4.53336	1.02128	-0.265419	-0.203793	-0.309892	-0.431915	-0.916432	-0.733029	0.147715	-0.0981917	-0.0438062	0.0321934	0.0430078	0.1925	0.0261459	0.0209198	0.136863	0.0462056
9938	ARHGAP25	0.243236	0.119973	2.02743	0.0426183	0.308716	25.9733	9.45604	0.149508	0.417611	0.974756	2.87545	-0.0973921	1.44933	-0.636658	2.16592	0.0917019	0.221376	1.32528	-0.0312199	0.276808	-0.209076	0.414051	0.0482185	0.0515786	0.212424	0.102758	0.0364772	0.107844	0.0365444
79018	GID4	-0.224491	0.110763	-2.02677	0.0426864	0.308982	14.0813	8.14724	0.227514	0.0983727	-0.0648904	-2.4346	-1.06478	-0.429148	-0.349293	-2.48919	0.0295669	-0.0236989	-1.08883	-0.18837	-0.0762751	-0.0885409	-0.592097	0.0903364	0.133382	0.200015	0.0312971	0.03159	0.0642553	0.0565807
5569	PKIA	-0.421996	0.208356	-2.02536	0.0428304	0.309404	77.6679	31.345	2.17799e-05	-0.289872	-1.03638	-1.02826	-6.75107	-0.570289	-0.912096	-1.39972	-0.0650411	-0.250581	-0.434238	-1.6203	-0.118389	-0.19866	-0.30612	0.0503458	0.0584599	0.178342	0.0576032	0.0430959	0.0474394	0.0478302
64708	COPS7B	-0.246701	0.121936	-2.02321	0.0430518	0.31027	48.7486	13.6582	0.0336966	-3.42032	-1.69104	-2.29251	-0.37916	-0.527272	-0.629516	0.636195	-0.613905	-0.365279	-1.0168	-0.100754	-0.0726871	-0.165772	0.106322	0.0322157	0.0466599	0.196718	0.0706116	0.019004	0.0693438	0.0279295
9334	B4GALT5	0.230453	0.113976	2.02195	0.0431815	0.310693	4.18594	7.30582	0.293489	1.7231	0.828315	2.44293	-0.429559	0.482874	-0.0793936	1.43391	0.406074	0.244268	1.09311	-0.111969	0.0887527	-0.0329766	0.380322	0.0555378	0.0869644	0.200218	0.0679436	0.0337828	0.172521	0.0703494
9489	PGS1	0.202018	0.0999219	2.02176	0.0432015	0.310693	0	6.85616	0.334355	0.264274	1.87522	2.5612	0.589894	0.601145	0.472774	0.43291	0.0599884	0.529373	1.15459	0.108895	0.122579	0.184168	0.0931152	0.0515258	0.0796929	0.203223	0.0340775	0.0415793	0.151748	0.0462642
6286	S100P	0.24336	0.120379	2.02161	0.0432168	0.310693	0	2.39444	0.88009	0.831684	0.168037	1.65716	1.05531	0.637978	1.10892	0.514616	0.243837	0.0647125	0.713359	0.482499	0.136042	0.494973	0.140374	0.0859575	0.148308	0.185305	0.20904	0.0454711	0.199235	0.0744064
7423	VEGFB	-0.335578	0.166035	-2.02113	0.0432666	0.310693	71.6114	24.6578	0.000395023	-3.07439	-1.12697	-2.28021	-5.01401	1.09124	0.166601	-0.818389	-0.532623	-0.209374	-1.01064	-0.915961	0.214923	0.0443823	-0.169494	0.0300138	0.0345157	0.196447	0.0333721	0.0387901	0.0709687	0.0428931
4841	NONO	-0.19982	0.0988675	-2.02109	0.0432703	0.310693	24.1585	9.22978	0.161062	-1.0607	-1.97952	-1.40863	1.06493	-3.19316	-0.452226	0.185591	-0.193916	-0.362131	-0.601105	0.234366	-0.396983	-0.160604	0.0392681	0.0334224	0.0334668	0.182097	0.048434	0.0154562	0.126126	0.044768
5734	PTGER4	0.318545	0.157648	2.02061	0.0433202	0.310825	56.799	16.2033	0.0127032	4.26083	2.22522	0.386851	-0.919618	1.51239	-0.608248	2.21882	0.889604	0.579919	0.161744	-0.262881	0.225489	-0.211498	0.547651	0.0435917	0.067919	0.174811	0.0817154	0.0222294	0.120907	0.0609205
4124	MAN2A1	-0.166853	0.0825996	-2.02002	0.0433812	0.311036	0	2.86227	0.825925	-0.530027	-1.41777	-1.6426	-0.668055	0.011481	-0.625014	-1.05667	-0.100441	-0.293458	-0.706699	-0.11493	0.00248002	-0.168541	-0.230537	0.0359109	0.0428429	0.185099	0.0295966	0.0466608	0.0727166	0.0476001
28951	TRIB2	-0.256287	0.126925	-2.0192	0.0434661	0.311069	30.6221	10.0897	0.120926	-1.32057	-1.85621	-2.40311	0.210115	-1.91571	-1.15999	1.05618	-0.294654	-0.513191	-1.07271	0.0560908	-0.325369	-0.345105	0.270335	0.0497856	0.0764375	0.199258	0.0712637	0.0288466	0.0885101	0.0655126
5876	RABGGTB	-0.22724	0.112579	-2.01849	0.0435407	0.311069	30.6286	10.0906	0.120888	-0.166517	0.699986	-2.62123	-0.955692	-0.942245	-0.801861	-2.67537	-0.0392164	0.197352	-1.18635	-0.177075	-0.139125	-0.232502	-0.522447	0.055465	0.0794885	0.204838	0.0343304	0.0218012	0.0840724	0.0381344
738	VPS51	-0.354994	0.175874	-2.01846	0.0435435	0.311069	70.8046	23.9764	0.000527503	-0.862847	-1.51877	-2.31429	-5.49317	1.03091	0.262134	-2.28214	-0.186697	-0.342871	-1.02772	-0.964466	0.227615	0.0787143	-0.417455	0.0468176	0.0509654	0.197204	0.0308267	0.0487486	0.0901697	0.0334607
84333	PCGF5	-0.442817	0.219386	-2.01843	0.0435461	0.311069	75.6771	28.7795	6.69689e-05	0.131062	0.15739	-2.83544	-0.663457	-1.75873	-0.697287	-6.15221	0.0372996	0.0497978	-1.3029	-0.145869	-0.326057	-0.211946	-1.35948	0.0809943	0.100107	0.211146	0.0483393	0.034371	0.09239	0.0488295
7852	CXCR4	0.373063	0.184867	2.018	0.0435909	0.311069	62.5669	18.7	0.00470142	0.769096	-0.862286	3.40311	-0.198849	3.66064	0.0796394	3.24963	0.1845	-0.307729	1.64223	-0.0551995	0.630296	0.0302789	0.700216	0.0575482	0.12736	0.232871	0.0770592	0.0296466	0.144552	0.0464298
7099	TLR4	0.290303	0.143916	2.01718	0.0436769	0.311069	36.8888	11.0915	0.0855884	0.795788	1.17642	3.17962	1.91286	0.975197	0.400946	-0.735584	0.209116	0.361445	1.5026	0.479442	0.194034	0.127159	-0.193082	0.0690526	0.0943968	0.223325	0.0628207	0.0395887	0.100582	0.0689002
196	AHR	-0.234552	0.116286	-2.01703	0.0436921	0.311069	23.9307	9.20214	0.162525	0.294604	-1.03888	0.0868255	-3.72755	-0.195903	-0.0373173	-1.59811	0.0892987	-0.327328	0.036246	-0.680906	-0.0340887	-0.015886	-0.271079	0.0918785	0.099274	0.174271	0.0333677	0.0302787	0.18122	0.0287727
23450	SF3B3	-0.307791	0.152601	-2.01696	0.0436993	0.311069	65.1386	20.0795	0.00268055	-1.21606	-0.837434	-3.93913	-3.35735	0.638096	-0.720299	-0.449768	-0.283655	-0.207823	-2.01988	-0.494596	0.110904	-0.201865	-0.0770288	0.0544088	0.0615864	0.262936	0.0217024	0.0302082	0.0785408	0.0293311
4648	MYO7B	0.179925	0.089207	2.01694	0.043702	0.311069	0	2.37527	0.882158	0.135795	0.942867	0.699976	-0.591894	0.986981	1.73507	0.843183	0.04103	0.317057	0.293755	-0.177349	0.216746	0.291115	0.14725	0.0912931	0.113077	0.176118	0.0897781	0.0482265	0.028151	0.0304977
389114	ZNF662	-0.285634	0.141657	-2.01638	0.0437601	0.311257	54.4207	15.3578	0.0176488	-0.0912459	-1.67231	-1.06713	-4.30067	-0.763062	0.376503	-0.896996	-0.0187867	-0.393492	-0.451064	-0.952096	-0.184176	0.0647929	-0.215429	0.0423911	0.0553652	0.178665	0.0490105	0.0582566	0.0296154	0.05768
54726	OTUD4	-0.286355	0.142086	-2.01537	0.0438662	0.311549	68.708	22.3699	0.00103745	-0.631982	-0.319425	-2.36651	-0.774314	-1.63329	0.560019	-5.06928	-0.106058	-0.0656496	-1.05408	-0.187889	-0.223381	0.0920118	-0.877	0.0281628	0.0422402	0.198397	0.0588799	0.0187054	0.0269949	0.02993
4688	NCF2	0.341877	0.169674	2.01491	0.0439141	0.311549	49.2015	13.7799	0.0321932	0.340027	1.54706	3.82981	1.05061	1.27186	0.0168142	0.205481	0.0926872	0.535652	1.93702	0.349267	0.275077	0.00594532	0.041315	0.0743041	0.119881	0.255809	0.110518	0.0467765	0.125025	0.0404271
9168	TMSB10	-0.381684	0.189501	-2.01415	0.0439933	0.311549	81.1786	37.1917	1.61567e-06	-1.19571	-1.58572	-0.110856	-7.60386	-2.16886	0.035743	-0.933536	-0.23366	-0.357268	-0.0462802	-1.41684	-0.242284	0.0147595	-0.139583	0.0381871	0.0507618	0.174289	0.0347197	0.0124792	0.170516	0.0223563
28962	OSTM1	0.427277	0.212147	2.01406	0.0440032	0.311549	81.9714	38.8273	7.73769e-07	2.26208	2.65482	3.71365	4.47968	0.879743	-0.185246	-2.09614	0.504456	0.651537	1.85255	0.882793	0.129543	-0.0481961	-0.368947	0.0497316	0.0602292	0.24885	0.0388351	0.0216827	0.06769	0.0309804
9241	NOG	-0.244497	0.121403	-2.01392	0.0440182	0.311549	20.7446	8.8322	0.183237	-1.48134	-1.00992	-1.15125	-2.73459	-0.663437	-0.824197	0.843691	-0.471235	-0.413136	-0.487635	-0.810612	-0.121635	-0.150672	0.19692	0.101197	0.167346	0.179412	0.08787	0.033614	0.0334197	0.0544772
5782	PTPN12	0.241513	0.119989	2.0128	0.0441356	0.312122	33.8385	10.5802	0.102251	1.5807	2.4711	2.3298	0.759813	1.3338	-0.323514	-0.69007	0.350825	0.64275	1.03552	0.1454	0.228279	-0.113469	-0.139349	0.0492587	0.0676555	0.197554	0.0366197	0.0292923	0.123018	0.0407774
10085	EDIL3	-0.371252	0.184832	-2.00859	0.0445804	0.314867	68.8881	22.4994	0.000982688	-0.713185	-1.97407	-3.14291	0.434477	-1.65036	1.01953	-3.65835	-0.16645	-0.465213	-1.48048	0.120671	-0.433813	0.182072	-0.852016	0.0544705	0.0555368	0.221891	0.0771393	0.069095	0.0318921	0.0542408
4208	MEF2C	-0.187524	0.0933893	-2.00799	0.0446446	0.314867	0	6.73304	0.346243	0.147097	0.125119	0.902729	-1.50544	-0.808129	-1.05393	-2.58226	0.0379324	0.0354805	0.380203	-0.311165	-0.128176	-0.270752	-0.556524	0.0664988	0.0804145	0.177385	0.042722	0.0251567	0.0659967	0.0464482
65258	MPPE1	0.290974	0.144925	2.00775	0.0446694	0.314867	50.7579	14.2155	0.0273195	1.32589	0.462712	3.6357	0.0596132	1.92516	-0.613778	1.83803	0.311376	0.133637	1.79775	0.0116008	0.360234	-0.191628	0.369341	0.0551515	0.0834127	0.244501	0.0378698	0.0350137	0.0974752	0.0403784
54905	CYP2W1	-0.170734	0.0850383	-2.00773	0.0446725	0.314867	0	6.85551	0.334417	-0.704836	-0.303059	0.508121	-2.28712	0.166363	-0.00831552	-2.40178	-0.175221	-0.0855287	0.2127	-0.337735	0.0314392	-0.00143444	-0.507668	0.0618012	0.0796469	0.175226	0.0218059	0.0357131	0.0297568	0.0446778
131540	ZDHHC19	0.230331	0.114729	2.00762	0.0446838	0.314867	0	6.25534	0.395203	-0.277797	0.461619	0.607482	-0.4049	1.30106	2.84449	0.0333465	-0.106743	0.204093	0.254601	-0.171859	0.283834	0.685996	0.00761416	0.147647	0.195473	0.175652	0.180155	0.0475924	0.0581615	0.0521368
4329	ALDH6A1	-0.256945	0.128091	-2.00596	0.0448604	0.315858	35.2804	10.8159	0.0942361	0.331725	-1.17469	-1.96513	-2.57618	0.0401204	0.423658	-2.52035	0.102295	-0.421801	-0.857054	-0.493663	0.00799512	0.0947183	-0.513963	0.0950935	0.128933	0.190211	0.0367207	0.0397118	0.0499847	0.0415854
6185	RPN2	0.262056	0.130671	2.00546	0.0449139	0.315858	41.7202	12.011	0.0617235	1.76712	1.76018	-1.76716	2.74613	1.81197	1.10206	-0.168049	0.497266	0.582543	-0.764043	0.54949	0.355304	0.241505	-0.0314795	0.0791853	0.109532	0.186933	0.0400385	0.0384501	0.0480219	0.0350902
50865	HEBP1	-0.293008	0.146113	-2.00535	0.0449259	0.315858	29.073	9.8693	0.130265	0.153322	-0.634188	-0.733537	-4.00948	0.00612448	-0.357752	-1.26933	0.0369984	-0.17165	-0.308002	-0.822849	0.00193308	-0.147129	-0.468898	0.0582316	0.0732573	0.176305	0.0421175	0.0996229	0.169134	0.136461
90379	DCAF15	-0.267086	0.133216	-2.00491	0.0449731	0.315858	42.5522	12.185	0.0579671	-0.829086	-1.45342	-1.35948	-1.34439	1.23877	-0.579161	-3.31357	-0.240999	-0.353868	-0.579232	-0.356198	0.221167	-0.140908	-0.641632	0.0844952	0.059279	0.181536	0.0701993	0.0318755	0.059193	0.0374956
8818	DPM2	-0.277264	0.1383	-2.0048	0.0449849	0.315858	28.4602	9.78476	0.134014	-1.61843	-0.992797	-1.10048	0.393828	0.221465	-0.437668	-3.34081	-0.497488	-0.310262	-0.465534	0.0895766	0.0551343	-0.149781	-0.76586	0.0944874	0.0976646	0.178954	0.051734	0.0619773	0.117117	0.0525527
23708	GSPT2	-0.260975	0.130339	-2.00229	0.045254	0.317115	52.637	14.7795	0.022043	0.424988	-3.32153	-2.17578	-2.28998	0.368622	-0.796222	-0.636808	0.0866409	-0.778842	-0.958902	-0.359313	0.0575722	-0.203727	-0.153275	0.0415617	0.0549822	0.194231	0.0246197	0.0243929	0.0654679	0.0579328
987	LRBA	-0.288845	0.144262	-2.00222	0.0452607	0.317115	62.0859	18.4628	0.005174	-0.634222	-3.0066	-0.612853	-4.09364	-0.526182	-1.18098	0.955426	-0.138952	-0.749191	-0.25687	-0.740206	-0.080484	-0.303699	0.169856	0.0480009	0.0620919	0.175677	0.0326954	0.0233962	0.06613	0.0316057
29894	CPSF1	-0.241946	0.120865	-2.00179	0.0453071	0.317214	27.7434	9.68769	0.138435	-2.01232	-1.46312	-2.20339	-0.382602	0.392546	0.27792	-1.82859	-0.488444	-0.362192	-0.972495	-0.0828528	0.0727409	0.0721392	-0.5094	0.0589166	0.0612799	0.194802	0.0468943	0.0343382	0.0673756	0.0776041
8832	CD84	-0.1872	0.0935512	-2.00105	0.0453872	0.317494	0	6.34798	0.385358	-0.13725	-0.537524	0.594837	-0.361529	-1.55734	0.0226533	-2.73844	-0.0383333	-0.162223	0.24926	-0.103485	-0.276858	0.00420498	-0.60367	0.0780059	0.0910808	0.175593	0.0819345	0.0316046	0.0344559	0.0485953
2213	FCGR2B	0.205565	0.102763	2.00038	0.0454588	0.317585	0	5.67588	0.460459	0.129902	0.790627	1.65229	-0.345155	0.712198	0.378531	2.35282	0.0401089	0.279662	0.71113	-0.11402	0.137783	0.0813417	0.645715	0.0953339	0.125119	0.185236	0.109128	0.0374273	0.0461767	0.0753192
30001	ERO1A	0.362751	0.181417	1.99954	0.0455499	0.317585	63.6004	19.231	0.0037908	3.00858	1.41883	1.67744	3.80811	0.0622895	0.423428	-1.1412	0.72915	0.408469	0.722653	0.961401	0.0125568	0.133122	-0.267606	0.0587366	0.0828811	0.185595	0.0637369	0.0406374	0.0988421	0.0549881
10247	RIDA	-0.278935	0.139529	-1.99912	0.0455959	0.317585	41.5473	11.9755	0.0625177	0.976717	0.267831	-1.46472	-3.09113	-0.542859	-1.07511	-2.87809	0.275304	0.0835788	-0.626183	-0.491697	-0.115169	-0.283883	-0.85757	0.079449	0.0973799	0.182766	0.0253024	0.045009	0.0697227	0.0887832
221477	C6orf89	0.18624	0.0931709	1.99891	0.0456184	0.317585	6.44927	7.48257	0.278512	1.5552	-0.940362	0.950638	2.67129	1.18519	0.0721991	0.194729	0.335372	-0.305584	0.400775	0.550833	0.191149	0.0152665	0.0357026	0.0465034	0.105601	0.177734	0.0425205	0.0260115	0.044711	0.0336156
57097	PARP11	-0.316787	0.15851	-1.99853	0.0456593	0.317645	65.4702	20.2723	0.00247655	1.10328	-0.234217	-0.855356	-4.83818	-1.22948	-1.54371	-2.07145	0.239395	-0.0712944	-0.35992	-1.10671	-0.183969	-0.301074	-0.448285	0.0470829	0.0926561	0.177059	0.0523241	0.0223896	0.0380378	0.0468338
55312	RFK	-0.32581	0.163166	-1.9968	0.0458472	0.317964	68.395	22.1484	0.00113815	1.28235	0.247188	-2.21058	-2.6449	-2.29443	-0.35367	-4.46148	0.345725	0.0663661	-0.976047	-0.560608	-0.412092	-0.05726	-0.838098	0.0726859	0.0720839	0.194953	0.0449264	0.0322581	0.0262123	0.0352884
29922	NME7	-0.291489	0.14598	-1.99678	0.0458493	0.317964	61.2025	18.0424	0.0061271	-0.524461	-0.0852174	-1.84103	-4.70366	-1.04972	0.274468	-1.17676	-0.123265	-0.0217904	-0.798469	-0.979697	-0.188325	0.0473255	-0.232922	0.0552398	0.0653842	0.188102	0.0433822	0.032186	0.0297308	0.0391785
468	ATF4	-0.44942	0.225171	-1.9959	0.0459447	0.318251	82.8879	40.9068	3.02068e-07	-0.109587	-0.680881	-2.65828	-3.62049	0.557494	-0.295363	-7.62461	-0.0232994	-0.2361	-1.20613	-0.625627	0.0960238	-0.0999025	-1.16642	0.0452035	0.12024	0.205867	0.0298605	0.0296672	0.114404	0.0234031
221914	GPC2	-0.307594	0.154133	-1.99564	0.0459728	0.318251	57.3658	16.4188	0.0116744	-1.6431	-1.05073	0.682681	-4.53262	-2.30239	-0.902688	0.765755	-0.472834	-0.34024	0.286422	-0.827926	-0.512118	-0.177222	0.163498	0.0828112	0.104855	0.176026	0.0333645	0.0494746	0.0385442	0.0455875
272	AMPD3	0.283717	0.142226	1.99483	0.0460613	0.318629	60.4117	17.682	0.00707802	1.23423	3.99653	2.6158	0.900124	0.572461	-0.85634	0.576541	0.230226	0.716158	1.18346	0.270093	0.104303	-0.137202	0.140204	0.0347953	0.0321108	0.20469	0.0900374	0.0331975	0.0256701	0.0591369
993	CDC25A	-0.232393	0.11653	-1.99427	0.0461229	0.318629	22.9874	9.08942	0.168611	0.854302	-1.83973	-1.33124	-2.69042	-0.222341	-0.678669	-0.966699	0.229172	-0.576503	-0.566714	-0.725508	-0.0643587	-0.108859	-0.176393	0.0719616	0.0981959	0.181224	0.0727184	0.0837866	0.0257286	0.033295
55773	TBC1D23	-0.17209	0.0862932	-1.99425	0.0461246	0.318629	0	2.67807	0.848031	0.671992	-0.412816	-0.299587	-1.78043	-0.586827	-0.969937	-1.21995	0.20768	-0.141036	-0.125177	-0.302171	-0.0931857	-0.22976	-0.29305	0.0955125	0.11672	0.174583	0.0288041	0.0252161	0.0561129	0.0577027
2035	EPB41	-0.368448	0.184857	-1.99315	0.0462448	0.319231	59.4523	17.2636	0.00836167	-1.17256	-0.580497	-1.50914	0.670277	-0.478224	-1.04595	-5.58189	-0.378585	-0.220931	-0.646147	0.223983	-0.0917991	-0.36742	-0.975327	0.104245	0.144848	0.183319	0.111666	0.0368481	0.123398	0.0305309
91151	TIGD7	0.184306	0.0924833	1.99286	0.0462767	0.319231	0	4.38231	0.625086	1.81011	1.00799	1.42901	-0.618514	1.02858	-0.0243948	0.760322	0.353072	0.297447	0.610199	-0.165544	0.21297	-0.00529733	0.195202	0.0380467	0.0870781	0.182337	0.0716354	0.0428706	0.0471542	0.0659132
54874	FNBP1L	-0.22492	0.112906	-1.99209	0.0463609	0.319364	2.46109	7.17662	0.304822	0.46235	0.151412	-1.5931	-2.13697	-0.239881	-2.21961	-0.0743173	0.113417	0.045919	-0.684139	-0.498543	-0.0624582	-0.459458	-0.0273635	0.0601745	0.091974	0.184417	0.0544263	0.0677936	0.0428487	0.13557
25824	PRDX5	-0.180466	0.0906114	-1.99164	0.0464104	0.319482	0.757977	7.05346	0.315931	-0.556973	-1.91993	-1.83092	-0.858793	0.849814	-0.108451	-1.71416	-0.111389	-0.420046	-0.793739	-0.157945	0.16676	-0.0391142	-0.293347	0.0399958	0.0478656	0.187939	0.0338248	0.0385067	0.130078	0.0292861
63910	SLC17A9	-0.17887	0.0898658	-1.99041	0.0465458	0.319898	0	6.58213	0.361224	-1.71774	-2.10352	-0.00666066	0.538395	-0.565153	-0.456163	-1.6414	-0.529731	-0.641508	-0.00278032	0.103068	-0.112643	-0.0914305	-0.27744	0.0951031	0.0930059	0.174243	0.0366476	0.0397263	0.0401737	0.0285701
4221	MEN1	-0.351197	0.176486	-1.98994	0.046597	0.319898	78.4808	32.5291	1.29159e-05	-2.76877	-3.41608	-1.7483	-5.66766	1.11638	-0.418446	0.496099	-0.489694	-0.70606	-0.755307	-0.895678	0.228453	-0.0739536	0.0916723	0.0312807	0.0427197	0.186644	0.0249745	0.0418766	0.0312348	0.034146
51098	IFT52	-0.346974	0.174365	-1.98993	0.0465988	0.319898	63.6858	19.2762	0.00372173	-0.415174	1.32332	-2.68226	-4.92958	-0.727809	-0.670519	-2.08705	-0.114931	0.422411	-1.21902	-0.800105	-0.156853	-0.17456	-0.521121	0.0766332	0.101893	0.206547	0.0263436	0.0464461	0.0677743	0.0623461
4520	MTF1	0.274285	0.137838	1.98991	0.0466009	0.319898	53.7806	15.1451	0.0191574	1.84092	-1.09637	1.37731	4.07071	2.29913	-0.605841	0.862203	0.405404	-0.261386	0.587157	0.761306	0.356642	-0.197861	0.173577	0.048496	0.0568396	0.181737	0.0349766	0.0240623	0.10666	0.0405289
55656	INTS8	0.187572	0.0942928	1.98925	0.0466736	0.320173	0	6.35548	0.384569	1.84272	1.30937	0.520029	1.12563	-0.0250192	-0.279348	1.88673	0.507178	0.507342	0.217713	0.397425	-0.0033451	-0.0751255	0.396724	0.0757531	0.150133	0.175273	0.124657	0.0178761	0.0723241	0.044214
26574	AATF	0.152268	0.0765576	1.98893	0.046709	0.320192	0	5.23313	0.514279	-0.139005	-0.461456	0.788602	1.3007	2.14087	-0.289846	1.40558	-0.0266799	-0.0992431	0.331429	0.190983	0.42081	-0.0903819	0.242342	0.0368389	0.046253	0.17663	0.0215593	0.0386359	0.0972367	0.0297268
219899	TBCEL	-0.220582	0.110936	-1.98837	0.0467704	0.32039	4.32903	7.31674	0.292545	-0.943032	-0.16055	-1.30238	0.646696	-1.12327	-0.87154	-2.56191	-0.336313	-0.0654983	-0.553951	0.113088	-0.213315	-0.256293	-0.644593	0.127185	0.166433	0.180913	0.0305795	0.0360641	0.0864764	0.0633056
57062	DDX24	-0.191497	0.0963459	-1.9876	0.0468559	0.320753	4.95366	7.36483	0.288421	-1.6635	-1.07667	-0.834645	-2.55529	1.09004	-0.421541	-0.276074	-0.291817	-0.246861	-0.351069	-0.489014	0.225708	-0.133917	-0.0622906	0.0307734	0.0525701	0.176922	0.0366237	0.0428752	0.100924	0.0509089
11078	TRIOBP	0.236581	0.119047	1.98729	0.0468902	0.320764	43.1735	12.3182	0.0552351	1.33427	0.656383	2.33648	-1.02081	1.05658	0.456961	3.10363	0.262415	0.153336	1.03889	-0.193777	0.171311	0.120503	0.593699	0.0386806	0.0545726	0.197705	0.0360342	0.0262887	0.0695402	0.0365926
10653	SPINT2	-0.201603	0.101499	-1.98626	0.0470041	0.32132	20.2447	8.77684	0.186523	-3.50644	-0.451809	-1.08256	0.653528	-0.275016	-0.64705	-1.04714	-0.571527	-0.0847226	-0.457753	0.176082	-0.0451132	-0.204642	-0.223195	0.0265669	0.0351632	0.178798	0.0725945	0.0269087	0.100026	0.0454319
6280	S100A9	0.303281	0.152757	1.98539	0.047101	0.321759	54.6224	15.4261	0.0171892	1.49457	0.295679	3.69145	1.47195	1.83694	0.511474	-0.559713	0.228437	0.055946	1.83679	0.655071	0.343885	0.238157	-0.113077	0.0233613	0.0358012	0.247586	0.198056	0.0350458	0.21681	0.040815
51733	UPB1	0.182912	0.0921655	1.9846	0.0471892	0.321854	0	1.16093	0.97877	0.851229	0.833268	0.0343979	0.713113	0.0159206	1.2558	1.26239	0.249572	0.28501	0.0143587	0.192708	0.00343609	0.231873	0.241564	0.0859607	0.116991	0.174247	0.0730268	0.0465811	0.0340924	0.0366167
210	ALAD	-0.174762	0.0880854	-1.984	0.0472558	0.321854	0	2.18722	0.901699	-0.685579	-1.44345	-1.31239	-0.820485	-0.143409	-0.100388	-1.06944	-0.13709	-0.283429	-0.558376	-0.183498	-0.03226	-0.0228663	-0.292333	0.0399849	0.0385556	0.18102	0.0500177	0.0506033	0.0518836	0.0747206
11340	EXOSC8	-0.148362	0.0747796	-1.98398	0.0472576	0.321854	0	3.26062	0.775497	-1.45131	0.178195	-0.854894	-0.180687	-1.94884	-0.70062	-0.0801329	-0.264143	0.0443853	-0.359722	-0.0253917	-0.291124	-0.191051	-0.0189008	0.0331251	0.062042	0.177055	0.0197482	0.0223154	0.0743593	0.0556338
79848	CSPP1	-0.233985	0.117941	-1.98392	0.0472652	0.321854	41.3098	11.927	0.0636167	-0.996353	1.23685	-2.47233	-2.57658	-0.472484	-1.46144	-1.06145	-0.197197	0.311427	-1.10826	-0.546927	-0.072868	-0.338803	-0.20793	0.0391717	0.063398	0.200943	0.0450578	0.0237848	0.0537443	0.0383736
23248	RPRD2	-0.202798	0.102227	-1.9838	0.0472786	0.321854	20.2356	8.77584	0.186582	-0.947788	-2.35239	-1.11314	-2.20269	-0.419283	-0.671868	0.837247	-0.237876	-0.69509	-0.471037	-0.398726	-0.0632885	-0.158649	0.160943	0.0629909	0.0873097	0.179066	0.0327673	0.0227842	0.055758	0.036952
257218	SHPRH	-0.156074	0.0786974	-1.98322	0.047343	0.321944	0	4.30492	0.635486	0.617677	-0.910192	0.564778	-1.6381	-1.93756	-0.275553	-0.442353	0.157065	-0.279153	0.236573	-0.30304	-0.276097	-0.0507661	-0.094874	0.0646604	0.0940632	0.175459	0.0342232	0.0203054	0.0339419	0.0459998
6036	RNASE2	0.269518	0.135922	1.98289	0.0473794	0.321944	0	5.73474	0.453551	1.08561	-0.40372	2.38164	1.45246	0.68436	0.0974783	0.255703	0.362328	-0.143396	1.06177	0.542212	0.204405	0.0391678	0.0926695	0.111394	0.126157	0.19875	0.139358	0.0892102	0.161451	0.131342
1788	DNMT3A	-0.164981	0.0832124	-1.98265	0.0474064	0.321944	12.6319	8.01208	0.23722	-0.479524	-0.407545	-0.525154	-2.68096	-0.446893	0.553798	-2.18467	-0.0919746	-0.0863284	-0.219872	-0.472928	-0.0603516	0.0945922	-0.420588	0.0367887	0.0448699	0.175293	0.0311179	0.0182377	0.0291748	0.0370632
84876	ORAI1	-0.17169	0.0866227	-1.98204	0.047475	0.321944	0	5.54359	0.476204	-1.65417	-2.04445	-0.866463	0.0179774	0.398205	-0.518032	-1.17388	-0.362328	-0.587503	-0.36467	0.00338594	0.0811906	-0.13936	-0.219463	0.0479783	0.0825783	0.177133	0.0354733	0.0415718	0.0723702	0.0349523
6556	SLC11A1	0.244284	0.123262	1.98182	0.0474994	0.321944	0	6.8844	0.33167	0.612762	0.791333	2.96019	0.458667	0.897554	0.639876	0.0910933	0.194407	0.285523	1.37337	0.147533	0.178337	0.248666	0.0235093	0.100657	0.130186	0.215245	0.103463	0.0394785	0.151022	0.066605
123811	FOPNL	-0.327626	0.165352	-1.98138	0.0475486	0.321944	71.4804	24.5445	0.000414517	1.73492	0.22131	-2.72871	-3.6827	-2.51396	-0.511163	-3.29246	0.345374	0.0485733	-1.24416	-0.584999	-0.361522	-0.159839	-0.716465	0.0396297	0.048172	0.207893	0.0252336	0.02068	0.0977788	0.0473531
84898	PLXDC2	0.246373	0.124369	1.98099	0.0475929	0.321944	30.3257	10.0467	0.122697	1.65155	2.03289	1.9102	1.3607	1.5131	0.000394917	-1.38694	0.389311	0.567529	0.831004	0.265171	0.310427	0.000116639	-0.337688	0.0555661	0.0779378	0.189255	0.0379775	0.0420903	0.0872315	0.0592809
56993	TOMM22	-0.223099	0.112622	-1.98095	0.047597	0.321944	37.3862	11.1797	0.0829803	-2.4461	0.266612	-2.30639	-2.81427	-0.116112	0.403155	-0.592891	-0.465604	0.064886	-1.02375	-0.429994	-0.0195936	0.114712	-0.125227	0.0362313	0.0592303	0.197026	0.023345	0.0284757	0.080961	0.0446113
10634	GAS2L1	-0.21458	0.108326	-1.98087	0.0476056	0.321944	27.9466	9.71502	0.137178	-1.02456	-1.37008	0.0268511	-3.44114	-0.234748	0.534394	-1.11055	-0.265607	-0.385452	0.0112084	-0.604551	-0.0417931	0.0931922	-0.256392	0.0672061	0.0791498	0.174245	0.0308648	0.031696	0.0304114	0.0533007
1362	CPD	0.288168	0.145488	1.9807	0.0476254	0.321944	41.2308	11.911	0.063984	2.08024	1.91297	2.90806	-0.000637576	1.45471	0.184694	-0.814077	0.468141	0.513752	1.34368	-0.000196274	0.274673	0.0664603	-0.192654	0.0506435	0.0721259	0.213492	0.0947683	0.0356516	0.129486	0.0560047
63935	PCIF1	0.186497	0.0941815	1.98019	0.0476824	0.321944	0	6.61591	0.357831	-0.480948	0.458247	-0.750798	0.607413	2.59919	-0.0393722	1.82716	-0.146317	0.141295	-0.315339	0.136537	0.452356	-0.00844037	0.35875	0.0925543	0.0950723	0.176404	0.0505281	0.0302891	0.0459563	0.0385505
222487	ADGRG3	0.249021	0.125782	1.97978	0.0477278	0.321948	12.9998	8.04596	0.234756	0.472772	-0.719186	2.70188	1.79377	1.45516	0.341711	0.290923	0.121112	-0.268598	1.22961	0.458778	0.287665	0.115963	0.0806716	0.0656251	0.139484	0.207111	0.0654139	0.0390798	0.115165	0.076893
4070	TACSTD2	0.263073	0.132893	1.97958	0.0477505	0.321948	0	3.41221	0.75561	1.66137	0.606001	-0.446373	1.31062	0.13614	0.341668	1.46674	0.609095	0.256418	-0.186731	0.532532	0.0404569	0.130672	0.396756	0.134412	0.17904	0.175	0.165098	0.0883109	0.146269	0.073171
7039	TGFA	0.376841	0.190427	1.97892	0.0478246	0.322226	73.972	26.8941	0.000151575	1.48739	1.88504	2.59833	4.802	0.336801	0.14407	-1.12924	0.358794	0.695114	1.17419	0.937627	0.0543081	0.0400183	-0.194774	0.058189	0.135979	0.204214	0.0381256	0.0260005	0.0771561	0.0297501
55526	DHTKD1	0.174611	0.0882657	1.97824	0.0479015	0.322303	1.65723	7.11796	0.310076	0.402613	2.50213	1.76512	-0.161507	1.02058	0.438786	0.792002	0.0903016	0.720732	0.763097	-0.0281291	0.182946	0.0994612	0.129351	0.0503056	0.0829714	0.186901	0.0303339	0.0321329	0.0513809	0.0266738
10092	ARPC5	0.283653	0.143418	1.9778	0.0479509	0.322398	48.0391	13.4717	0.0361281	1.6976	1.49833	3.32332	0.791151	1.45973	0.189962	-0.820715	0.363125	0.435802	1.59136	0.215108	0.232	0.0756963	-0.148896	0.0457556	0.0845993	0.229295	0.0739254	0.0252597	0.158787	0.0329142
7940	LST1	0.320971	0.162331	1.97726	0.0480123	0.322398	60.9027	17.9041	0.00647649	-0.909459	0.355755	3.28671	2.3485	3.11726	0.474676	0.441197	-0.182132	0.0848141	1.56842	0.652955	0.501612	0.179814	0.0901491	0.0401059	0.0568373	0.227719	0.0773007	0.0258934	0.1435	0.0417501
23345	SYNE1	0.230527	0.11659	1.97724	0.048014	0.322398	38.9105	11.4586	0.0751955	-0.875315	1.24897	2.57066	2.33499	0.408044	0.689222	1.37397	-0.182215	0.280204	1.15957	0.560339	0.0671595	0.118606	0.3406	0.0433349	0.0503325	0.203473	0.057588	0.0270895	0.0296138	0.0614517
132949	AASDH	0.196946	0.0996273	1.97682	0.0480615	0.322497	26.4562	9.51813	0.146467	3.10772	1.05166	-0.374556	1.05712	1.21602	-1.16677	1.40898	0.583823	0.263789	-0.156587	0.225519	0.154986	-0.260919	0.281188	0.0352923	0.0629161	0.174775	0.0455109	0.0162443	0.0500077	0.0398279
161823	ADAL	-0.195238	0.0988044	-1.97601	0.0481538	0.322887	5.28692	7.39074	0.286217	1.07201	-1.4324	-0.735482	-2.18434	-1.37165	-1.41169	0.114652	0.270505	-0.366533	-0.308829	-0.641061	-0.245993	-0.248088	0.0255069	0.0636726	0.0654784	0.176316	0.0861308	0.0321634	0.0308841	0.0494938
7185	TRAF1	0.401301	0.203115	1.97573	0.0481852	0.322887	77.9649	31.7675	1.80804e-05	-0.0558457	2.50059	0.691169	6.39254	0.864171	-0.125084	1.50797	-0.0141152	0.650227	0.29002	1.36995	0.17695	-0.0206701	0.34639	0.0638844	0.0676151	0.176071	0.0459261	0.0419278	0.0273074	0.0527651
5093	PCBP1	-0.299682	0.151727	-1.97513	0.0482531	0.323121	63.7294	19.2994	0.0036868	-1.06268	0.430266	-3.25079	-0.62338	-0.466757	-0.336976	-4.02039	-0.209148	0.0918821	-1.54612	-0.107652	-0.0709254	-0.152366	-0.748001	0.0387347	0.0456025	0.22621	0.029822	0.0230899	0.204445	0.0346154
7130	TNFAIP6	0.318885	0.161569	1.97368	0.0484186	0.324009	37.5866	11.2155	0.081939	0.651815	-0.332222	3.18954	0.317829	2.59684	0.418155	0.601248	0.179389	-0.089921	1.50862	0.128787	0.623952	0.150624	0.163724	0.0757428	0.0732596	0.223719	0.164195	0.0577313	0.129753	0.074151
22884	WDR37	0.157024	0.0796163	1.97226	0.0485795	0.324865	0	5.35388	0.49929	1.61402	0.528944	1.60926	-0.651038	1.48409	-0.680189	0.824673	0.284322	0.12513	0.691491	-0.167225	0.210817	-0.19214	0.164926	0.0310313	0.055963	0.184637	0.0659763	0.0201785	0.0797949	0.039996
121536	AEBP2	-0.19806	0.100474	-1.97125	0.0486951	0.325115	19.9196	8.74122	0.188663	-0.13364	0.540134	-1.46017	-2.17512	-0.814577	0.46298	-2.74339	-0.0372502	0.144497	-0.624146	-0.364529	-0.146963	0.0940136	-0.488831	0.0776933	0.0715675	0.182711	0.0280864	0.03255	0.0412341	0.0317497
55717	WDR11	-0.164796	0.0836095	-1.97103	0.0487209	0.325115	0	2.90618	0.820527	-0.0339327	0.943419	-0.541508	-1.63013	-1.04235	-0.475387	-1.27941	-0.0128354	0.398276	-0.226762	-0.332815	-0.143657	-0.105125	-0.243265	0.143081	0.178221	0.17536	0.0416834	0.0189943	0.0489007	0.0361526
3065	HDAC1	-0.613802	0.311442	-1.97084	0.0487419	0.325115	93.2594	103.849	0	-2.56697	-5.07307	-2.23396	-13.299	0.317226	-0.497519	-0.105379	-0.51367	-0.875725	-0.987621	-1.76587	0.0523475	-0.181577	-0.018672	0.0400431	0.0297984	0.195447	0.0176311	0.0272304	0.133199	0.031396
8882	ZPR1	-0.135316	0.0686613	-1.97078	0.0487491	0.325115	0	5.59845	0.469639	0.435878	0.122513	-1.5877	-0.807111	-0.821484	0.152365	-2.32533	0.0935308	0.0328557	-0.681686	-0.126628	-0.108302	0.0335295	-0.321661	0.0460447	0.0719208	0.184345	0.0246146	0.0173811	0.0484263	0.019135
56942	CMC2	-0.323105	0.163988	-1.97029	0.0488048	0.325266	70.8884	24.0454	0.000512307	0.221029	-1.76117	-2.17619	-5.72719	-1.06947	-0.133261	-0.0562093	0.0394308	-0.368604	-0.959105	-0.941237	-0.154151	-0.0425777	-0.0142025	0.0318253	0.0438044	0.19424	0.0270094	0.0207756	0.102084	0.0638431
64223	MLST8	-0.250428	0.127134	-1.96979	0.0488625	0.32543	51.6153	14.4674	0.0248294	-1.93163	-0.612507	-1.02559	-4.39689	-0.056413	-0.0145248	-0.185076	-0.402431	-0.158706	-0.433087	-0.78261	-0.00960812	-0.00312476	-0.0342744	0.0434046	0.0671375	0.17832	0.0316811	0.029008	0.0462821	0.0342959
2157	F8	0.164603	0.0835977	1.96899	0.0489548	0.325559	5.81122	7.43188	0.282745	2.67843	0.242042	0.728943	-0.365544	1.42399	-0.351699	1.4923	0.472956	0.0406657	0.306051	-0.0887003	0.302063	-0.0562689	0.262631	0.0311803	0.0282276	0.176279	0.0588804	0.0449971	0.0255974	0.0309728
54499	TMCO1	0.166554	0.0845967	1.9688	0.0489757	0.325559	0	6.75036	0.344552	0.966174	2.01164	-0.0636272	-0.916731	2.18597	-0.197139	0.912747	0.183586	0.431085	-0.0265607	-0.163187	0.318256	-0.0675683	0.199653	0.0361052	0.0459227	0.174258	0.0316873	0.0211965	0.117474	0.0478467
29085	PHPT1	-0.310793	0.157915	-1.9681	0.0490566	0.325559	65.496	20.2875	0.00246118	-2.05454	-0.0319219	-2.19192	-5.4113	0.432399	-0.14178	-0.853162	-0.425168	-0.00899615	-0.966844	-0.816421	0.0839176	-0.0390069	-0.165521	0.0428244	0.0794212	0.194564	0.0227627	0.0376648	0.0756928	0.0376394
1318	SLC31A2	0.304903	0.154935	1.96794	0.0490746	0.325559	43.795	12.4544	0.0525662	-0.707594	2.23421	2.85278	1.28443	0.530633	-0.136545	1.67381	-0.157759	0.616777	1.31258	0.559229	0.104481	-0.0499036	0.367901	0.0497073	0.0762092	0.211696	0.189566	0.0387689	0.13357	0.0483113
3292	HSD17B1	-0.200647	0.101966	-1.96777	0.0490941	0.325559	0	6.96325	0.324259	-1.73141	-0.359429	-0.0930963	0.345228	-1.70958	0.993789	-2.2357	-0.417357	-0.107435	-0.0388643	0.0952263	-0.345896	0.272692	-0.406523	0.0581055	0.0893434	0.174275	0.0760853	0.0409366	0.0752932	0.0330629
91977	MYOZ3	0.17182	0.0873249	1.96759	0.049115	0.325559	0	2.0592	0.914174	0.143489	0.773278	1.2879	0.526552	0.718733	0.478425	1.62193	0.0350848	0.229126	0.547563	0.136923	0.129661	0.0882001	0.341557	0.0597863	0.087797	0.18076	0.0676195	0.032545	0.0339868	0.0443467
23174	ZCCHC14	-0.308636	0.156861	-1.96757	0.0491174	0.325559	65.1197	20.0687	0.00269253	0.335051	0.319996	-1.38439	-5.70099	-1.3594	-0.877929	-1.51969	0.0732115	0.0853582	-0.590304	-0.928692	-0.24055	-0.208378	-0.338951	0.0477458	0.0711543	0.181818	0.0265365	0.0313126	0.0563359	0.0497466
7462	LAT2	0.301238	0.153121	1.96732	0.0491466	0.325559	58.7768	16.9807	0.00935434	0.704006	0.195106	3.41008	3.47778	0.812073	0.147886	0.0759026	0.150291	0.0457022	1.64673	0.746771	0.153124	0.0508487	0.0137989	0.0455738	0.0548698	0.233193	0.0461074	0.0355547	0.118224	0.0330505
23	ABCF1	-0.311207	0.158251	-1.96654	0.0492362	0.325933	69.1299	22.6757	0.000912716	-1.95407	-3.39545	-3.1921	-2.67534	0.59147	-0.506056	1.10893	-0.317153	-0.717348	-1.51018	-0.427834	0.103936	-0.153608	0.238471	0.0263426	0.0446339	0.223821	0.0255736	0.0308792	0.0921359	0.0462446
26037	SIPA1L1	0.360767	0.183665	1.96426	0.0494995	0.327456	74.626	27.5873	0.000112356	-0.132614	1.02128	2.83665	1.27109	1.48675	-1.07001	5.08699	-0.0352675	0.323475	1.30357	0.257119	0.242159	-0.177828	1.01308	0.0707247	0.100322	0.211184	0.0409179	0.0265291	0.02762	0.0396613
6932	TCF7	-0.233052	0.118849	-1.96091	0.0498894	0.32961	28.8299	9.83559	0.131749	-1.90788	-2.10045	-2.31528	0.455772	0.532102	-0.598905	-1.05808	-0.404858	-0.540507	-1.02822	0.176471	0.106654	-0.100286	-0.248807	0.04503	0.066218	0.197226	0.149918	0.0401755	0.0280393	0.0552952
2322	FLT3	0.233682	0.119172	1.96089	0.0498922	0.32961	5.55993	7.41211	0.28441	1.55145	1.77373	0.0746469	-1.31272	0.565703	1.64504	1.49667	0.534961	0.668102	0.0311612	-0.401928	0.132209	0.299062	0.425799	0.118896	0.141877	0.174264	0.0937459	0.0546194	0.0330498	0.0809392
4689	NCF4	0.244719	0.124837	1.96031	0.0499593	0.329814	23.1175	9.1048	0.167769	0.908875	0.501796	3.34992	0.319473	1.40386	0.26074	0.391733	0.183411	0.133411	1.60819	0.0945981	0.268109	0.100309	0.0944677	0.0407233	0.0706856	0.230466	0.0876794	0.0364735	0.148	0.0581549
8515	ITGA10	-0.173957	0.0887514	-1.96005	0.04999	0.329814	0	3.30532	0.769665	0.509694	-1.09867	-0.322516	-0.729455	-1.10938	-0.00694921	-1.95278	0.137725	-0.369057	-0.134778	-0.162411	-0.209292	-0.00154813	-0.35504	0.0730142	0.112836	0.174637	0.0495716	0.0355914	0.0496303	0.0330559
2185	PTK2B	0.187966	0.0959415	1.95917	0.0500929	0.330271	16.2346	8.35667	0.213119	-0.92072	1.96236	0.770176	1.92904	2.24954	0.0126445	0.348067	-0.183921	0.422099	0.323583	0.537357	0.324795	0.00294004	0.0621078	0.0399033	0.0462668	0.176519	0.077597	0.0208464	0.0540638	0.0318395
1349	COX7B	-0.207	0.105688	-1.9586	0.0501593	0.330281	17.4416	8.47884	0.205078	-0.039288	-0.738984	-2.88413	-2.16849	-0.400924	-0.260513	-0.497262	-0.00901461	-0.196952	-1.33016	-0.322498	-0.0569415	-0.0953508	-0.161942	0.0526471	0.0710313	0.212706	0.0221177	0.0201713	0.133964	0.106059
5352	PLOD2	-0.2614	0.133502	-1.95803	0.050227	0.330281	42.8449	12.2474	0.0566725	-0.913075	-2.04233	-2.48097	0.905423	-2.28376	0.106027	-0.963966	-0.194588	-0.512315	-1.11274	0.183317	-0.587739	0.0278672	-0.195972	0.045417	0.062925	0.201159	0.0409921	0.0662321	0.0690799	0.0413298
90864	SPSB3	-0.24528	0.125291	-1.95769	0.0502667	0.330281	47.4964	13.3324	0.0380504	-0.885848	-1.20753	-1.27127	-4.07017	0.856204	-0.125122	-1.17817	-0.191444	-0.214975	-0.540234	-0.71931	0.150638	-0.037088	-0.265127	0.0467052	0.0316943	0.180587	0.0312325	0.0309538	0.0878617	0.0506398
22904	SBNO2	0.199226	0.101781	1.95739	0.0503016	0.330281	0	2.70722	0.844594	0.594279	0.808562	1.65402	1.28659	1.06767	0.00982936	-0.0232291	0.182658	0.298653	0.711921	0.262511	0.226436	0.0035067	-0.00531416	0.0944701	0.136429	0.18526	0.0416304	0.0449796	0.127276	0.0523365
353345	GPR141	0.224856	0.114877	1.95736	0.0503051	0.330281	7.86663	7.59768	0.269084	1.38387	0.503152	2.92888	-0.237085	0.918415	0.639998	0.418374	0.361033	0.160352	1.35549	-0.0721045	0.183501	0.135492	0.116524	0.0680623	0.101567	0.214185	0.0924948	0.0399206	0.0448198	0.0775711
81929	SEH1L	-0.19683	0.100561	-1.95732	0.0503103	0.330281	17.1006	8.44397	0.207347	1.13833	-1.14487	-1.54053	-2.40509	-1.04828	-0.415088	-1.24238	0.24377	-0.37154	-0.660311	-0.527042	-0.170088	-0.0780347	-0.250973	0.0458589	0.105317	0.183721	0.0480206	0.0263264	0.0353423	0.0408078
57161	PELI2	0.348908	0.178296	1.9569	0.0503587	0.330281	70.0486	23.3712	0.000681236	1.22447	0.59527	2.85173	5.09566	0.314368	-0.562747	0.606859	0.244178	0.14565	1.31199	1.0566	0.0562084	-0.178623	0.129012	0.0397667	0.0598679	0.211662	0.0429956	0.0319689	0.100751	0.0451947
79586	CHPF	-0.212327	0.108512	-1.95672	0.0503808	0.330281	28.4615	9.78494	0.134006	-0.0801428	-0.626201	-0.624587	-0.860152	-0.086357	-0.4664	-3.85515	-0.0211194	-0.184984	-0.26183	-0.184653	-0.0140634	-0.0858604	-0.705817	0.0694437	0.087265	0.175733	0.0460854	0.0265209	0.0338898	0.0335197
91056	AP5B1	0.285071	0.145698	1.95658	0.0503966	0.330281	45.3874	12.8176	0.0460263	-0.186918	0.906274	2.73598	0.537644	0.611453	-0.139267	3.42469	-0.0487348	0.286942	1.24812	0.126303	0.124385	-0.0384289	0.720782	0.0679791	0.100246	0.208108	0.0551869	0.0413818	0.0761414	0.0442962
7572	ZNF24	-0.290623	0.148611	-1.95559	0.0505132	0.330297	64.7379	19.8513	0.00294326	-0.141039	-0.142918	0.815472	-5.20836	-2.21294	0.354459	-4.00951	-0.039784	-0.0567484	0.342885	-0.657059	-0.307419	0.0719406	-0.83403	0.0795679	0.157664	0.176798	0.015915	0.0192984	0.0411922	0.0432694
2937	GSS	-0.198692	0.101647	-1.95472	0.0506164	0.330297	18.4604	8.58479	0.198311	-1.58178	-2.59585	-1.80695	-0.272364	-0.0424221	0.305692	-0.818648	-0.320731	-0.661703	-0.782547	-0.0439478	-0.0087471	0.0698589	-0.182925	0.0411142	0.0649781	0.187555	0.0260359	0.0425151	0.0522246	0.0499287
55363	HEMGN	-0.374323	0.1915	-1.95469	0.0506198	0.330297	58.5192	16.8753	0.00975277	-0.971212	-0.322687	-1.68655	0.204968	-0.408516	-0.527824	-5.32604	-0.266478	-0.107657	-0.726838	0.127083	-0.0694626	-0.229884	-1.0324	0.0752826	0.111307	0.185727	0.384418	0.0289124	0.189688	0.0375741
26578	OSTF1	0.273589	0.139975	1.95456	0.0506349	0.330297	54.1511	15.2675	0.0182749	2.51468	0.179287	2.92768	1.71185	2.55616	-0.0956787	-1.145	0.455902	0.0436427	1.3548	0.300684	0.451511	-0.0388943	-0.230057	0.0328682	0.0592551	0.214145	0.0308524	0.0312006	0.16525	0.0403699
4849	CNOT3	0.166593	0.0852377	1.95446	0.0506473	0.330297	0	3.70953	0.715915	0.141254	0.17116	-0.469432	1.07262	1.21196	-0.409917	2.11481	0.0424915	0.0526622	-0.196423	0.187401	0.187875	-0.12095	0.427686	0.0904901	0.0946658	0.175081	0.0305247	0.0240305	0.0870594	0.0408984
10610	ST6GALNAC2	0.356994	0.182657	1.95445	0.050648	0.330297	59.7636	17.3972	0.00792924	0.574324	2.04585	3.31516	0.286519	2.86302	-1.03261	0.610505	0.166657	0.711936	1.58623	0.101961	0.586226	-0.222302	0.144911	0.0842042	0.121098	0.228941	0.126637	0.0419259	0.0463462	0.056341
256471	MFSD8	-0.202907	0.103826	-1.9543	0.0506654	0.330297	34.0248	10.6101	0.101202	0.473535	-0.461157	1.10412	-3.34809	-2.10251	-1.6136	-0.509455	0.0991882	-0.122496	0.467118	-0.603378	-0.284769	-0.332345	-0.0932414	0.043875	0.070558	0.178986	0.0324776	0.0183447	0.0424216	0.033497
4943	TBC1D25	-0.173591	0.0888261	-1.95428	0.0506677	0.330297	0	4.16398	0.654497	-0.382885	0.298879	-1.99408	-0.67185	-0.410215	-1.38076	-1.11568	-0.0967849	0.0772514	-0.870867	-0.16371	-0.0791864	-0.261661	-0.253594	0.0638968	0.0668069	0.19073	0.059375	0.037263	0.0359121	0.0516649
7920	ABHD16A	-0.238211	0.121922	-1.9538	0.0507252	0.330453	55.9048	15.8747	0.0144423	-0.65177	0.1894	-1.47812	-4.23617	0.365611	-0.303177	-2.56736	-0.116923	0.039056	-0.6322	-0.701849	0.0539378	-0.0946047	-0.365184	0.0321817	0.042522	0.182931	0.0274499	0.0217645	0.0973716	0.0202326
124460	SNX20	0.169936	0.0870151	1.95294	0.0508263	0.330892	0	5.36922	0.497402	-0.455699	-0.765955	1.94952	0.400354	0.980266	1.52655	1.06615	-0.131672	-0.28654	0.849633	0.16933	0.147085	0.256394	0.226137	0.0834889	0.139947	0.189935	0.178887	0.0225139	0.0282095	0.0449892
11278	KLF12	-0.168815	0.0864831	-1.952	0.0509376	0.331398	0	1.53321	0.957258	0.109448	-0.402268	-0.986417	-0.890364	-1.51871	-1.01078	-0.275367	0.0280389	-0.120548	-0.416179	-0.159284	-0.264547	-0.229595	-0.0646752	0.0656299	0.0898019	0.178008	0.0320045	0.0303428	0.0515959	0.0551635
85313	PPIL4	-0.264504	0.135555	-1.95127	0.051025	0.331746	55.8592	15.8583	0.0145349	-1.64878	0.45801	-0.841837	-2.6549	-0.934631	0.825732	-3.40797	-0.364644	0.108615	-0.354141	-0.542759	-0.175437	0.131052	-0.778099	0.0489118	0.0562382	0.176969	0.0417943	0.0352338	0.0251888	0.0521289
3608	ILF2	-0.202553	0.103834	-1.95074	0.0510886	0.331941	16.3152	8.36473	0.212582	-0.204986	-1.80298	-2.59032	-1.61189	-0.129751	-0.26763	-0.372495	-0.0332407	-0.391856	-1.16995	-0.410353	-0.0257618	-0.0949034	-0.0720175	0.0262963	0.047236	0.203998	0.0648106	0.0394211	0.125746	0.0373796
1633	DCK	-0.43546	0.223281	-1.95028	0.0511427	0.332073	69.0153	22.5918	0.000945377	-0.130038	-0.0474438	-3.43878	0.0492163	-1.00374	-0.624879	-5.08477	-0.0429007	-0.0175039	-1.66536	0.0150034	-0.214438	-0.211286	-1.12943	0.10884	0.136116	0.234534	0.0929308	0.0456414	0.114327	0.0493375
92565	FANK1	-0.171525	0.0879948	-1.94926	0.0512642	0.332642	0	5.15532	0.524052	-1.52459	-0.931548	-1.29436	0.0727342	0.0441026	-0.0455336	-2.01944	-0.33543	-0.244095	-0.55041	0.0199699	0.0103351	-0.00739171	-0.463624	0.0484061	0.0686608	0.180828	0.0753833	0.0549161	0.0263528	0.0527072
79720	VPS37B	0.212196	0.108887	1.94878	0.0513215	0.332795	20.2605	8.77859	0.186418	0.758832	-0.748723	0.231608	-0.0501455	2.75581	0.0738638	2.78202	0.185595	-0.21847	0.096735	-0.00945654	0.436559	0.0257004	0.552223	0.0598194	0.0851416	0.174446	0.0355632	0.025095	0.121065	0.039401
57471	ERMN	0.285572	0.14662	1.9477	0.0514509	0.333414	63.064	18.9517	0.00424595	4.23612	-1.21274	2.5183	1.28412	0.726259	0.394409	1.33881	0.724084	-0.265614	1.13213	0.338957	0.133725	0.0640027	0.304986	0.0292174	0.0479696	0.202106	0.0696747	0.0339033	0.0263332	0.0518949
6730	SRP68	-0.233943	0.120191	-1.94642	0.0516043	0.334188	52.8294	14.8398	0.0215403	-1.94399	-2.48828	-0.641361	-3.38115	1.31067	-0.700111	-0.234182	-0.295073	-0.477715	-0.268924	-0.549473	0.187065	-0.206157	-0.0534207	0.0230393	0.0368585	0.175815	0.0264096	0.0203705	0.0867087	0.0520371
8731	RNMT	-0.24958	0.128352	-1.9445	0.0518354	0.335464	54.8145	15.4917	0.0167586	-1.99239	-2.99239	-1.14452	-0.525207	1.43978	-0.870693	-1.75754	-0.386779	-0.704095	-0.484701	-0.0749388	0.203691	-0.242239	-0.409229	0.0376857	0.055364	0.17935	0.0203588	0.0200147	0.0774028	0.0542156
10492	SYNCRIP	-0.143905	0.0740251	-1.944	0.0518949	0.335553	0	4.18747	0.651324	-0.653243	0.106647	-2.07439	-0.659951	-0.738059	-0.678132	-1.33615	-0.121645	0.0236589	-0.909482	-0.0985946	-0.10907	-0.193419	-0.265926	0.0346766	0.0492146	0.192224	0.0223194	0.0218389	0.0813527	0.0396105
662	BNIP1	-0.272552	0.140215	-1.94381	0.0519184	0.335553	59.4743	17.273	0.00833057	-1.30325	-1.22599	-0.96477	-4.94126	-0.0914526	0.272005	-0.608962	-0.317794	-0.375634	-0.406855	-0.834265	-0.0161869	0.0518584	-0.104345	0.0594613	0.0938758	0.177841	0.0285057	0.0313283	0.0363484	0.0293604
22849	CPEB3	0.248493	0.127869	1.94334	0.0519752	0.335553	32.4123	10.3569	0.110404	2.25586	1.13187	2.30638	-0.094005	0.513442	-0.926291	1.90937	0.548472	0.300466	1.02375	-0.0300725	0.107439	-0.211302	0.39325	0.0591134	0.0704693	0.197026	0.102338	0.0437863	0.0520369	0.0424186
80790	CMIP	-0.157909	0.0812738	-1.94292	0.0520256	0.335591	0	4.75868	0.575115	-1.68187	0.0588672	0.998961	-1.6431	-0.770195	0.102069	-1.18328	-0.314117	0.0114289	0.421588	-0.379507	-0.128808	0.0340291	-0.227376	0.0348817	0.037693	0.178106	0.0533472	0.0279695	0.111152	0.0369246
11325	DDX42	-0.266825	0.137367	-1.94242	0.0520867	0.335642	61.8282	18.3382	0.00544043	-2.45362	-1.61312	-1.29762	-3.94756	0.860427	-0.797394	0.464752	-0.44512	-0.301197	-0.551853	-0.761358	0.129334	-0.22278	0.0861266	0.032911	0.0348633	0.180863	0.0371982	0.0225942	0.0780561	0.0343425
80232	WDR26	-0.329807	0.169807	-1.94225	0.0521068	0.335642	62.5103	18.6718	0.00475536	-1.20857	0.586032	-2.96093	0.148847	-0.989383	-0.502678	-3.86442	-0.293107	0.176287	-1.37379	0.0250723	-0.164986	-0.222231	-0.90693	0.0588181	0.090489	0.215271	0.0283731	0.0278076	0.195448	0.055078
23659	PLA2G15	-0.207071	0.106673	-1.94118	0.0522367	0.335893	19.6954	8.71681	0.190142	0.107895	0.0839672	-0.221548	-3.31634	0.011319	-0.380549	-2.07233	0.0320055	0.0289287	-0.0925286	-0.607806	0.00210021	-0.0733383	-0.40408	0.0879931	0.118697	0.174429	0.0335902	0.034428	0.0371399	0.0380204
29785	CYP2S1	-0.206648	0.106458	-1.94112	0.0522432	0.335893	13.6289	8.10456	0.230543	-2.5711	1.45671	-0.861184	-0.930311	-1.20565	-1.13714	-0.708485	-0.651016	0.419655	-0.362412	-0.300633	-0.221567	-0.197674	-0.151203	0.0641129	0.082993	0.177098	0.104428	0.0337731	0.0302184	0.0455469
345757	FAM174A	0.242853	0.125191	1.93986	0.0523964	0.336502	33.0446	10.4547	0.106763	0.548884	0.826298	2.36262	3.08537	1.07251	0.0458608	-0.628697	0.185136	0.318866	1.05211	0.509639	0.217145	0.0105827	-0.124303	0.113768	0.148917	0.198306	0.0272842	0.0409921	0.0532487	0.0390916
3936	LCP1	0.309006	0.159299	1.93978	0.0524063	0.336502	67.2113	21.3488	0.00158774	4.38612	1.95347	2.24536	1.36352	0.523141	0.344706	-1.35344	0.705029	0.384824	0.993277	0.474783	0.0624369	0.148935	-0.257781	0.0258376	0.0388071	0.19569	0.121246	0.0142444	0.186681	0.0362763
81532	MOB2	-0.16123	0.0831362	-1.93934	0.0524596	0.336625	0	5.57798	0.472082	-1.22151	0.44423	-0.371768	-2.09782	0.23994	0.00541881	-1.74727	-0.275571	0.107715	-0.155418	-0.403831	0.0424255	0.0014092	-0.32702	0.050895	0.0587945	0.174768	0.0370564	0.0312645	0.0676295	0.0350292
3949	LDLR	0.196401	0.101332	1.93819	0.0526	0.337075	0	2.95849	0.814039	1.57357	1.28924	-0.130095	-0.374837	0.941255	0.0575696	1.23698	0.385054	0.39487	-0.0543147	-0.104197	0.185556	0.0205209	0.293627	0.0598788	0.0938088	0.174307	0.0772732	0.0388631	0.127059	0.0563467
11213	IRAK3	0.418276	0.215819	1.93809	0.0526126	0.337075	72.1126	25.101	0.000327066	3.12039	0.395227	3.01264	4.0665	0.694782	0.444532	-1.52215	0.692229	0.118361	1.40362	1.07266	0.138549	0.16745	-0.397803	0.0492134	0.0896854	0.217072	0.0695796	0.0397657	0.141894	0.0683003
164091	PAQR7	-0.185761	0.0958888	-1.93726	0.0527139	0.33737	0	1.96837	0.922585	-0.225521	-0.88107	-0.395545	-1.66999	-1.31701	-0.42424	-0.185352	-0.0537254	-0.264936	-0.165391	-0.467651	-0.248124	-0.110927	-0.0427408	0.0567529	0.0904192	0.174837	0.0784178	0.0354942	0.0683675	0.0531727
79135	APOO	-0.233842	0.120728	-1.93693	0.0527535	0.33737	32.8668	10.427	0.107783	-0.304398	0.056023	-3.06808	-2.42817	-0.461475	-0.300119	-0.903938	-0.0766344	0.0157071	-1.43602	-0.457741	-0.0853968	-0.064398	-0.228086	0.0633817	0.0786063	0.219072	0.0355372	0.0342442	0.0460425	0.0636675
10949	HNRNPA0	-0.273111	0.141061	-1.93612	0.0528528	0.337568	51.1014	14.3154	0.0263052	1.231	-1.40582	-2.40301	-0.662433	-1.15854	-0.501962	-3.05427	0.223648	-0.355605	-1.07266	-0.157692	-0.197094	-0.162325	-0.684915	0.0330073	0.0639848	0.199255	0.0566675	0.0289417	0.104576	0.0502873
143098	MPP7	0.174013	0.0898968	1.9357	0.0529043	0.337568	0	5.66869	0.461307	-0.181769	0.51557	2.15353	1.41552	1.51282	-0.251917	0.351129	-0.0591009	0.195057	0.947992	0.378008	0.22346	-0.0518641	0.0812273	0.105719	0.143135	0.193779	0.071313	0.0218186	0.0423858	0.0535144
55975	KLHL7	0.150356	0.0776899	1.93533	0.0529493	0.337568	0	5.60143	0.469283	0.412992	1.34779	1.03268	-0.685929	0.743165	0.324162	2.27279	0.0836026	0.320859	0.436148	-0.154589	0.111469	0.0590335	0.466496	0.0409786	0.0566738	0.178378	0.0507927	0.0224977	0.0331645	0.0421288
2091	FBL	-0.210942	0.108995	-1.93533	0.0529498	0.337568	28.7691	9.82719	0.13212	-1.49415	-1.27052	-1.9755	-2.99518	0.554078	0.207437	0.0817955	-0.305484	-0.274276	-0.861996	-0.468984	0.107357	0.0668833	0.0173679	0.0418012	0.0466027	0.190395	0.0245171	0.0375419	0.103959	0.0450855
1360	CPB1	0.175538	0.0907382	1.93456	0.0530449	0.337955	0	6.75323	0.344273	0.214026	0.297221	0.0787373	0.183503	0.0512456	3.31399	0.550431	0.0468794	0.0782849	0.032869	0.0541759	0.0100234	0.557271	0.106934	0.047977	0.0693738	0.174266	0.0871619	0.0382575	0.0282768	0.0377419
8638	OASL	0.225836	0.116757	1.93424	0.0530841	0.33798	0	6.76466	0.34316	1.55249	0.966921	1.57779	-1.2254	1.47124	-0.139386	1.24062	0.49445	0.32202	0.677187	-0.455942	0.370449	-0.0340843	0.273538	0.101434	0.110913	0.184212	0.13844	0.0634004	0.0597959	0.0486139
284	ANGPT1	-0.185274	0.0958251	-1.93346	0.0531794	0.33798	3.98756	7.29072	0.294796	0.555937	0.145058	-0.417966	-2.93847	-1.2781	-0.89613	-0.6717	0.148752	0.0374848	-0.174801	-0.713706	-0.259921	-0.141326	-0.141684	0.071594	0.0667765	0.174907	0.0589923	0.0413572	0.0248714	0.0444932
311	ANXA11	0.194377	0.100536	1.93341	0.0531863	0.33798	21.8645	8.9588	0.175909	0.787607	0.717148	2.02851	2.71141	1.33537	-0.684055	-0.326356	0.177238	0.164321	0.887367	0.459112	0.22705	-0.206709	-0.0551043	0.0506401	0.0525009	0.19136	0.0286714	0.0289095	0.0913141	0.0285094
81575	APOLD1	0.19157	0.0991716	1.9317	0.0533965	0.338783	0	6.22587	0.39837	2.77836	-0.693178	0.196542	0.574878	0.756217	0.829902	0.540701	0.736945	-0.207903	0.0820758	0.146825	0.156656	0.202732	0.122167	0.0703548	0.0899565	0.174389	0.0652307	0.042914	0.0596748	0.0510494
5052	PRDX1	-0.307999	0.159458	-1.93154	0.0534158	0.338783	63.1153	18.978	0.00420088	-1.694	-1.12117	-3.26955	0.989933	-0.592057	0.0590273	-3.07164	-0.318165	-0.245092	-1.55774	0.161816	-0.114982	0.023099	-0.743145	0.0352758	0.0477877	0.226993	0.0267197	0.0377167	0.153137	0.0585338
55776	SAYSD1	-0.19765	0.102359	-1.93095	0.0534894	0.33903	23.9101	9.19964	0.162658	-0.906084	-2.7675	-1.42754	-0.595269	-1.82982	0.750711	-0.0262083	-0.231838	-0.680206	-0.609543	-0.127616	-0.265675	0.145299	-0.00518383	0.0654683	0.0604097	0.182319	0.0459602	0.0210807	0.0374609	0.0391221
22859	ADGRL1	-0.419781	0.217524	-1.92981	0.0536299	0.339578	81.5414	37.9227	1.16315e-06	-3.00626	-1.54083	-1.28436	-7.1125	-0.289756	-0.0467878	0.306551	-0.699596	-0.3883	-0.545999	-1.33415	-0.0516043	-0.00968602	0.0716248	0.0541553	0.0635071	0.180723	0.0351854	0.031718	0.0428573	0.0545912
6940	ZNF354A	0.182956	0.0948295	1.92932	0.0536912	0.339578	0	1.38255	0.966911	0.126841	0.199618	0.583855	1.27622	0.0288137	1.07899	1.38355	0.0383067	0.0697599	0.244623	0.295574	0.00695846	0.208459	0.283763	0.0912071	0.122127	0.175543	0.053639	0.0583214	0.0373257	0.042065
25926	NOL11	-0.325935	0.168965	-1.92901	0.0537299	0.339578	71.7271	24.7587	0.000378423	0.32488	-0.371541	-2.1264	-5.79712	-0.687677	-0.979872	-0.786977	0.0606997	-0.089741	-0.934737	-0.974019	-0.100214	-0.28693	-0.186262	0.0349082	0.0583402	0.193237	0.02823	0.0212369	0.085746	0.0560173
5473	PPBP	-0.228318	0.118369	-1.92887	0.0537469	0.339578	0	3.82901	0.699803	-0.705163	0.515071	0.230471	0.590241	-1.4934	-1.1735	-1.66678	-0.213421	0.208472	0.0962595	0.350114	-0.30225	-0.408479	-0.460351	0.0915997	0.163817	0.174444	0.351852	0.040962	0.121163	0.0762823
338339	CLEC4D	0.357296	0.185276	1.92845	0.0537992	0.339578	47.7232	13.3903	0.0372404	1.72564	1.71163	3.13131	1.50328	-0.3059	0.557413	-0.724537	0.519673	0.619987	1.47353	0.613475	-0.0711312	0.144867	-0.26449	0.0906901	0.131204	0.221444	0.166539	0.0540707	0.0675442	0.13326
116496	FAM129A	0.264034	0.136923	1.92833	0.053814	0.339578	42.5534	12.1852	0.0579617	-0.18131	0.449565	3.56738	2.14621	1.42417	0.252441	0.292275	-0.0457707	0.130457	1.75087	0.363975	0.248053	0.110283	0.0633843	0.0637285	0.0842071	0.240885	0.0287607	0.0303366	0.190854	0.0470306
9898	UBAP2L	-0.164076	0.0850933	-1.92819	0.0538319	0.339578	2.90406	7.20936	0.301919	-0.848754	-0.28406	-1.98562	-2.4074	-0.189139	-0.988701	0.380519	-0.210893	-0.0721321	-0.866824	-0.348844	-0.0232731	-0.294844	0.080546	0.061739	0.0644818	0.190577	0.0209975	0.0151407	0.0889314	0.0448058
549	AUH	-0.226475	0.117497	-1.9275	0.0539171	0.339578	36.2701	10.9839	0.0888768	-1.0658	0.821689	-2.35773	-0.212273	-1.18633	-0.458045	-2.85034	-0.239002	0.219447	-1.04964	-0.0356144	-0.200859	-0.11861	-0.631293	0.0502863	0.0713257	0.198193	0.0281487	0.0286664	0.0670541	0.0490535
7422	VEGFA	0.24098	0.125046	1.92714	0.0539625	0.339578	45.3755	12.8148	0.0460737	0.334653	1.57994	1.46732	3.43447	-0.535177	0.0505356	1.25181	0.0772919	0.361096	0.62735	0.949237	-0.0975828	0.00954683	0.2189	0.0533429	0.0522356	0.182798	0.0763886	0.0332469	0.0356881	0.0305782
440836	ODF3B	0.169257	0.0878346	1.927	0.05398	0.339578	0	2.93119	0.817432	0.76948	-0.871268	0.518052	0.373662	1.27282	0.81487	1.61283	0.199236	-0.291245	0.216881	0.0939381	0.233072	0.137291	0.368328	0.0670409	0.111741	0.175265	0.0632013	0.0335308	0.0283862	0.0521547
6210	RPS15A	-0.427354	0.221826	-1.92653	0.0540382	0.339578	82.3647	39.693	5.23369e-07	-1.60283	-2.50194	-1.79189	-8.13805	0.357416	0.147701	-0.576342	-0.333174	-0.600177	-0.775532	-1.15501	0.0528817	0.0627295	-0.161671	0.0432083	0.0575448	0.187317	0.0201433	0.0218909	0.180375	0.0786871
139596	UPRT	-0.217468	0.112883	-1.92648	0.0540441	0.339578	36.0914	10.9531	0.0898353	-0.327903	-2.19995	-1.71677	-3.086	-0.09457	-0.0807814	0.345463	-0.0608759	-0.455948	-0.740741	-0.598999	-0.0165946	-0.0195316	0.0811877	0.0344668	0.0429541	0.186171	0.0376757	0.0307912	0.0584592	0.0552302
1438	CSF2RA	0.216457	0.112359	1.92648	0.0540451	0.339578	15.0691	8.242	0.220905	0.815339	1.03671	3.10883	0.904161	0.83482	-0.0870623	0.169711	0.144693	0.241901	1.46012	0.253615	0.170158	-0.0341672	0.0387059	0.0314932	0.0544458	0.220589	0.0786787	0.0415452	0.154013	0.0520156
203068	TUBB	-0.384119	0.199414	-1.92623	0.0540754	0.339578	75.2602	28.2944	8.2692e-05	0.101222	-2.45162	-1.51081	-6.58637	-0.125902	-0.00216332	-1.14014	0.0201662	-0.616651	-0.6469	-1.14441	-0.0286193	-0.000691778	-0.258988	0.0396915	0.0632664	0.18334	0.0301904	0.0516716	0.102257	0.0515991
4678	NASP	-0.378234	0.196484	-1.92501	0.0542279	0.339857	81.9066	38.6881	8.23898e-07	-2.07846	-1.09273	-1.73761	-8.42355	-1.35633	-0.936301	1.11267	-0.369378	-0.221335	-0.750363	-1.12681	-0.231679	-0.233148	0.264149	0.0315835	0.0410272	0.186483	0.0178942	0.029177	0.0620059	0.0563597
9761	MLEC	-0.238595	0.123957	-1.92482	0.0542523	0.339857	43.0765	12.2972	0.0556574	0.429129	-2.72747	-2.20771	-2.03976	-0.922687	-0.577319	0.464054	0.0799812	-0.628874	-0.974631	-0.466282	-0.142961	-0.173233	0.0975978	0.0347377	0.0531628	0.194893	0.0522562	0.0240062	0.0900393	0.0442327
23603	CORO1C	-0.400394	0.208143	-1.92365	0.0543984	0.340037	77.4951	31.1044	2.42119e-05	0.513098	1.60052	-3.292	-1.76469	-2.53137	-0.871774	-4.87465	0.112729	0.394279	-1.57172	-0.337832	-0.450982	-0.290884	-1.05801	0.0482689	0.0606854	0.227944	0.0366491	0.0317399	0.111335	0.0471076
1819	DRG2	-0.236407	0.122915	-1.92333	0.0544384	0.340037	47.2127	13.2608	0.0390767	-0.432997	-0.324801	-2.56807	-3.11385	0.873442	-0.335947	-2.20507	-0.100628	-0.0888567	-1.15821	-0.486909	0.157406	-0.0780262	-0.371719	0.0540091	0.0748421	0.203404	0.0244513	0.0324768	0.0539436	0.0284174
51100	SH3GLB1	0.259774	0.135072	1.92323	0.0544512	0.340037	50.377	14.1064	0.0284702	2.12394	1.94606	2.72164	0.744332	1.93968	-0.0236363	-1.35684	0.432504	0.502397	1.24032	0.123015	0.317497	-0.00903344	-0.28597	0.0414661	0.0666471	0.207686	0.027314	0.026793	0.146065	0.0444205
51279	C1RL	0.239319	0.12445	1.92302	0.0544779	0.340037	29.7827	9.96905	0.125962	0.792899	1.85236	2.4026	2.18084	-0.0888664	-0.225146	0.118535	0.168361	0.538098	1.07245	0.560301	-0.0159175	-0.0734152	0.0256489	0.0450865	0.084386	0.199245	0.0660078	0.032083	0.106327	0.0468214
147798	TMC4	0.17676	0.0919484	1.92239	0.0545571	0.340093	0	3.64908	0.724041	1.52499	0.215274	-0.209314	0.725846	-0.334652	1.11604	1.74486	0.419449	0.0720539	-0.0874141	0.253319	-0.0671729	0.187269	0.37323	0.0756531	0.112029	0.174409	0.1218	0.0402902	0.0281562	0.0457545
4192	MDK	-0.440581	0.229204	-1.92222	0.054578	0.340093	86.4112	51.5131	2.33623e-09	-2.44225	-0.880506	-0.749149	-7.88221	-1.63536	0.717903	-0.583707	-0.398382	-0.156661	-0.314638	-2.11403	-0.253919	0.16284	-0.113409	0.0266085	0.0316561	0.176395	0.0719325	0.0241082	0.0514509	0.0377488
7597	ZBTB25	0.19734	0.102668	1.92212	0.0545905	0.340093	16.7021	8.40357	0.210002	-0.452644	1.95551	-0.611254	1.97869	0.746556	-0.165325	2.2539	-0.101335	0.502959	-0.256194	0.369332	0.152739	-0.0337519	0.500777	0.0501194	0.0661524	0.175669	0.0348401	0.0418575	0.041679	0.049365
65080	MRPL44	0.239848	0.124812	1.92167	0.0546472	0.340231	52.881	14.856	0.0214066	0.826892	0.280942	-0.80025	3.93072	3.72928	-0.009136	0.326236	0.191544	0.0668493	-0.336393	0.677498	0.542844	-0.00175502	0.065983	0.0536588	0.0566186	0.176702	0.0297079	0.0211885	0.0369022	0.0409073
6184	RPN1	0.203426	0.105888	1.92115	0.0547133	0.340333	27.5438	9.66102	0.139673	1.85536	-0.178368	0.780596	1.70548	2.9679	-0.140441	-0.536281	0.283114	-0.0350269	0.328019	0.398828	0.588053	-0.0504574	-0.0944523	0.0232845	0.0385627	0.176581	0.0546862	0.0392587	0.129081	0.0310199
191	AHCY	-0.308095	0.160384	-1.92099	0.0547328	0.340333	65.0238	20.0136	0.00275398	0.620832	-2.51365	-2.07363	-3.41066	0.751529	0.143944	-2.64044	0.12451	-0.609873	-0.909115	-0.669484	0.133523	0.0434759	-0.530222	0.0402215	0.0588665	0.19221	0.0385304	0.031566	0.0912247	0.0403241
83715	ESPN	-0.269031	0.140082	-1.92053	0.0547914	0.340482	28.3771	9.77341	0.134524	-1.84442	-1.17345	-1.53827	1.40996	-1.74244	-0.710279	-1.17597	-0.610735	-0.417618	-0.65929	0.289622	-0.455271	-0.228216	-0.275061	0.109644	0.126657	0.183692	0.0421943	0.0682689	0.103237	0.0547094
10105	PPIF	0.176694	0.0920341	1.91988	0.0548733	0.34057	0	6.62267	0.357156	0.824716	0.199892	2.17812	-0.696819	0.602825	1.69903	1.20921	0.215257	0.0550715	0.960054	-0.143781	0.115289	0.313357	0.273668	0.0681248	0.0759033	0.194279	0.0425758	0.0365757	0.0340156	0.0512205
55230	USP40	-0.153706	0.0800611	-1.91986	0.0548753	0.34057	0	5.29792	0.506209	-0.823021	-1.55895	-0.943218	-2.01608	-0.259114	0.58084	-0.719265	-0.203952	-0.387864	-0.397585	-0.377589	-0.0462712	0.0972967	-0.151841	0.0614092	0.0619003	0.177679	0.0350772	0.031889	0.0280597	0.0445659
84803	GPAT3	0.254586	0.132625	1.91959	0.0549095	0.34057	26.4205	9.51352	0.146691	1.30889	0.592982	2.42655	2.39903	0.0132972	0.581771	-0.450922	0.290653	0.188915	1.0847	0.692632	0.00271725	0.204133	-0.109165	0.0493111	0.101496	0.19982	0.0833553	0.0417576	0.123118	0.0586088
11167	FSTL1	-0.362929	0.189183	-1.9184	0.0550599	0.340819	65.9783	20.5751	0.00218644	0.169155	-0.1358	-1.08837	-5.46941	-0.816871	0.494214	-3.65939	0.0435424	-0.0442844	-0.460276	-1.03328	-0.22534	0.167642	-0.731306	0.0662603	0.106342	0.178848	0.0356906	0.0760971	0.115063	0.0399374
11345	GABARAPL2	-0.423311	0.220684	-1.91818	0.0550882	0.340819	76.9689	30.3937	3.30801e-05	-0.228334	0.857522	-1.63302	-2.35378	-1.91034	-0.291749	-7.64569	-0.0776207	0.374265	-0.702322	-0.499623	-0.260761	-0.140905	-1.26125	0.115562	0.190488	0.184965	0.045056	0.0186322	0.233258	0.0272127
51762	RAB8B	0.207972	0.108438	1.91789	0.0551254	0.340835	17.7445	8.51007	0.203063	2.53296	1.04357	1.80678	1.32156	0.710632	-0.343218	-0.781843	0.515784	0.287608	0.782469	0.286362	0.116728	-0.12818	-0.164208	0.0414647	0.0759556	0.187552	0.0469521	0.0269809	0.139476	0.044111
2034	EPAS1	-0.234471	0.122279	-1.9175	0.0551744	0.340924	10.5607	7.82654	0.251089	0.0390946	-0.780778	-0.5845	-1.19744	-0.415531	0.673619	-3.19727	0.0102563	-0.251091	-0.244895	-0.260191	-0.10741	0.247204	-0.777026	0.0688254	0.103421	0.175546	0.0472143	0.0668165	0.134674	0.0590626
11224	RPL35	-0.321815	0.167863	-1.91713	0.0552216	0.341001	71.9331	24.9404	0.000350238	-2.63464	-0.795926	-1.29265	-6.83282	-0.99072	0.397932	0.400352	-0.526622	-0.179656	-0.549659	-0.891825	-0.172365	0.15473	0.0806628	0.0399535	0.050949	0.18081	0.0170357	0.0302689	0.151192	0.0405941
79794	C12orf49	-0.180572	0.0942292	-1.91631	0.0553257	0.34143	7.38965	7.55855	0.272261	0.389512	-1.96305	-0.413148	-2.48085	0.0909513	-0.605104	-1.04573	0.0920096	-0.579248	-0.172779	-0.503495	0.0134863	-0.116271	-0.241484	0.0557987	0.0870693	0.174891	0.0411897	0.021987	0.0369219	0.0533257
7517	XRCC3	0.221601	0.115679	1.91565	0.0554099	0.341735	31.5429	10.2254	0.115476	-0.613738	0.470538	1.84187	3.3752	0.331705	0.74402	0.716307	-0.17944	0.159856	0.79886	0.699356	0.064005	0.136454	0.12116	0.0854814	0.115416	0.188116	0.0429336	0.0372328	0.0336358	0.0286101
25839	COG4	0.190361	0.0994107	1.9149	0.0555058	0.341794	11.793	7.93587	0.242839	-1.01287	0.949442	0.364733	1.38041	1.27312	0.0967854	2.72662	-0.220063	0.247782	0.152469	0.252881	0.227181	0.0227619	0.634759	0.0472045	0.0681087	0.174748	0.0335598	0.0318425	0.0553094	0.0541963
3579	CXCR2	0.364961	0.190599	1.91481	0.0555163	0.341794	56.6098	16.1327	0.0130592	-0.28913	-0.482112	3.95306	0.824068	2.50578	0.105982	2.1662	-0.0741575	-0.191388	2.03069	0.416263	0.397752	0.0467048	0.456457	0.0657843	0.157592	0.263888	0.255158	0.0251965	0.194202	0.0444018
55277	FGGY	0.275418	0.14384	1.91476	0.0555238	0.341794	62.5222	18.6777	0.00474396	1.35642	1.46806	2.25132	-1.49469	1.7704	-0.0987973	3.43755	0.289409	0.378186	0.996239	-0.232807	0.347363	-0.0203462	0.616398	0.0455234	0.0663624	0.195818	0.0242601	0.0384968	0.0424109	0.0321533
8530	CST7	0.224879	0.1175	1.91386	0.0556383	0.342285	0	4.01285	0.674938	0.28325	-0.525438	1.91619	0.841097	1.09622	0.621308	1.16294	0.0762059	-0.165991	0.833835	0.359412	0.274279	0.245973	0.295543	0.0723829	0.0997993	0.189357	0.182597	0.0626022	0.156733	0.0645847
79684	MSANTD2	-0.159466	0.0834199	-1.91161	0.0559264	0.34364	0	2.81225	0.832015	0.270475	-0.0280625	-0.262213	-1.91346	-1.35995	-0.832974	-0.345169	0.0764734	-0.00872714	-0.109536	-0.419561	-0.235903	-0.146479	-0.0643739	0.0799405	0.0967146	0.174503	0.0480784	0.0300897	0.0309234	0.0347821
57162	PELI1	0.388053	0.203033	1.91128	0.0559688	0.34364	70.9384	24.0868	0.000503412	2.93158	0.572761	3.8139	-1.8241	2.19638	0.100317	2.0995	0.640203	0.176854	1.92525	-0.41473	0.421297	0.0405702	0.46434	0.0476906	0.0953417	0.25482	0.0516935	0.0367926	0.163556	0.0489147
9980	DOPEY2	0.214161	0.112053	1.91125	0.0559722	0.34364	14.02	8.14143	0.227924	-0.0522818	1.81064	1.20025	-0.0126549	0.283951	-0.224175	2.90005	-0.0116974	0.441484	0.509049	-0.00362646	0.0521727	-0.0755767	0.632116	0.0500584	0.059452	0.179876	0.0821205	0.0337599	0.113659	0.0475099
23203	PMPCA	-0.267781	0.14013	-1.91095	0.0560111	0.34364	62.73	18.7818	0.00454837	-3.27088	0.225634	-2.7792	-1.75596	1.04777	-0.272633	-2.06121	-0.577275	0.0593372	-1.27178	-0.275782	0.145897	-0.0720586	-0.415416	0.0311483	0.0691586	0.209404	0.0246661	0.0193892	0.0698578	0.0406182
56265	CPXM1	-0.41696	0.218294	-1.91009	0.0561222	0.34364	77.6176	31.2746	2.24652e-05	-1.50625	0.260523	-1.62366	-5.37144	-2.38553	0.814205	-0.204752	-0.41409	0.0862383	-0.698054	-1.93221	-0.442394	0.154495	-0.0373244	0.0755781	0.109574	0.184835	0.129398	0.0343912	0.0360049	0.0332299
11120	BTN2A1	0.324893	0.170114	1.90986	0.0561514	0.34364	64.0602	19.477	0.0034295	-0.0424451	0.091793	2.21064	4.05558	0.685013	-0.840564	3.14328	-0.0112717	0.0290369	0.976077	0.874026	0.110911	-0.232469	0.657106	0.0705213	0.100064	0.194954	0.0464454	0.026215	0.0764869	0.0437024
339324	ZNF260	-0.174705	0.0914822	-1.90972	0.0561692	0.34364	0	4.2265	0.646055	-0.438223	-0.80098	-1.84538	0.480358	-1.44623	-0.930623	-0.667924	-0.0937047	-0.25678	-0.800504	0.105363	-0.27799	-0.20289	-0.180565	0.0457229	0.102773	0.188173	0.048111	0.0369472	0.0475305	0.0730823
[truncated: 6,954 more rows]
