# Supplementary material for: Perinatal granulopoiesis and risk of pediatric asthma
Source: eLife. 2021 Feb 10;10:e63745. doi: 10.7554/eLife.63745 (PMC7889076; doi:10.7554/eLife.63745)
Supplement: Supplementary file 3. [file elife-63745-supp3.xlsx]

## Sheet: res_nw
Table S3. Meta-Analysis of CBMC Gene Expression Associated with Birthweight
Lower (red) and Higher (blue) birthweight associated genes colored, 1% FDR
entrezgene	HGNC Symbol	Effect Size	SE	z-Score	p-value	p-adj (FDR)	I2	Q-value	Q, p-values	zSco_GSE27272	zSco_GSE30032	zSco_GSE37100	zSco_GSE36828	zSco_GSE48354	Effect_GSE27272	Effect_GSE30032	Effect_GSE37100	Effect_GSE36828	Effect_GSE48354	EffectVar_GSE27272	EffectVar_GSE30032	EffectVar_GSE37100	EffectVar_GSE36828	EffectVar_GSE48354
29116	MYLIP	-0.632677	0.101817	-6.21386	5.16997e-10	7.70532e-06	0	3.11444	0.53886	-2.77017	-2.19469	-2.69921	-0.883827	-4.60099	-0.565998	-0.500262	-0.610623	-0.31772	-0.902618	0.0417462	0.0519576	0.0511769	0.129228	0.0384862
5569	PKIA	-0.569339	0.102129	-5.57468	2.4798e-08	0.000184795	0	3.0779	0.544875	-1.91636	-2.33627	-3.57329	-1.84141	-2.97746	-0.425192	-0.556167	-0.930044	-0.398013	-0.638456	0.0492285	0.0566717	0.067744	0.0467189	0.0459802
55149	MTPAP	-0.464375	0.0954925	-4.86295	1.15651e-06	0.00574556	0	3.06409	0.547158	-0.482534	-2.14558	-3.33948	-1.87372	-2.68571	-0.109649	-0.540264	-0.57944	-0.537361	-0.497427	0.051636	0.0634049	0.0301065	0.0822476	0.0343037
2	A2M	0.529227	0.111891	4.72986	2.24679e-06	0.00837153	21.0574	5.06697	0.280494	2.93782	4.33914	2.47622	0.638663	1.11989	0.551777	0.842019	0.514941	0.160232	0.356017	0.0352757	0.0376561	0.043245	0.0629438	0.101063
9827	RGP1	0.394345	0.0850442	4.63694	3.53607e-06	0.0105403	0	3.7549	0.440192	0.387911	0.0240969	3.08335	3.04103	2.51995	0.0948013	0.00769913	0.444737	0.479017	0.521424	0.0597263	0.102085	0.0208047	0.0248119	0.0428152
79982	DNAJB14	-0.420166	0.0941852	-4.46106	8.1554e-06	0.0151935	0	3.26118	0.515107	0.163798	-1.91593	-3.3282	-1.70207	-2.34322	0.0470006	-0.568365	-0.496861	-0.382348	-0.473075	0.0823361	0.0880024	0.0222869	0.0504621	0.04076
1436	CSF1R	-0.483256	0.108033	-4.47322	7.70493e-06	0.0151935	0	1.59213	0.810205	-3.17743	-1.41031	-2.27821	-0.416346	-2.03796	-0.584852	-0.329498	-0.598456	-0.163797	-0.495848	0.0338798	0.0545855	0.0690047	0.154776	0.0591976
54477	PLEKHA5	-0.381839	0.0854903	-4.46647	7.95226e-06	0.0151935	0	3.77006	0.438018	-1.90751	-0.53521	-1.21144	-1.34001	-4.06585	-0.503205	-0.146741	-0.272666	-0.221958	-0.558671	0.0695918	0.0751721	0.0506595	0.0274363	0.0188803
6208	RPS14	-0.400587	0.0913786	-4.38382	1.16618e-05	0.0161496	0	3.37728	0.496782	-2.90724	-1.28025	-3.2264	-0.867034	-1.15873	-0.564097	-0.25972	-0.580017	-0.330861	-0.207811	0.0376484	0.0411552	0.032318	0.145619	0.0321644
5494	PPM1A	-0.552239	0.126109	-4.37906	1.19193e-05	0.0161496	30.8808	5.7871	0.215622	-0.608467	-0.579524	-5.11854	-1.37367	-3.83029	-0.161069	-0.220768	-0.716402	-0.406525	-0.801941	0.0700731	0.145121	0.0195894	0.0875808	0.0438351
80303	EFHD1	-0.482684	0.10972	-4.39923	1.08634e-05	0.0161496	0.707017	4.02848	0.402165	-2.06353	-1.39817	-0.197564	-0.76309	-4.10266	-0.470096	-0.471645	-0.0590784	-0.250162	-0.689529	0.0518979	0.113791	0.0894213	0.107471	0.0282471
26354	GNL3	-0.383681	0.0881093	-4.3546	1.33309e-05	0.0165569	0	2.38485	0.665367	-3.02379	-2.17556	-2.06133	-1.14704	-1.38067	-0.581316	-0.501352	-0.380144	-0.277279	-0.228817	0.036959	0.0531062	0.0340096	0.0584352	0.0274662
27072	VPS41	-0.528286	0.122342	-4.3181	1.57381e-05	0.0167544	43.3463	7.06044	0.132729	-1.20352	-3.49343	-3.86573	-0.358922	-3.79091	-0.234937	-0.667042	-0.708503	-0.104205	-0.743984	0.0381062	0.0364588	0.0335907	0.0842903	0.0385159
27018	BEX3	-0.450344	0.104164	-4.32343	1.53622e-05	0.0167544	0	3.02369	0.553869	-0.330708	-1.76206	-2.97902	-1.78477	-2.53802	-0.0822679	-0.421302	-0.612666	-0.527952	-0.524196	0.0618829	0.0571669	0.0422962	0.0875028	0.0426577
414157	C10orf62	0.388479	0.0920103	4.22213	2.42006e-05	0.0200381	0	3.27657	0.512654	1.81927	0.483156	0.948358	3.56071	1.99542	0.387317	0.104721	0.260238	0.574283	0.415639	0.0453252	0.0469783	0.0753004	0.0260123	0.0433872
6210	RPS15A	-0.417584	0.0987255	-4.22974	2.33957e-05	0.0200381	0	0.691267	0.952402	-2.41209	-1.44981	-2.38854	-0.8109	-2.07345	-0.497163	-0.352917	-0.362769	-0.341876	-0.570582	0.0424827	0.0592547	0.0230671	0.177747	0.0757268
4724	NDUFS4	-0.427104	0.10047	-4.25105	2.12774e-05	0.0200381	20.4665	5.02933	0.284302	-1.71195	-1.19105	-5.13146	-1.02983	-1.0088	-0.316302	-0.266947	-0.673293	-0.320379	-0.240661	0.0341368	0.0502334	0.0172158	0.0967817	0.0569119
9068	ANGPTL1	0.398067	0.0941227	4.22923	2.34493e-05	0.0200381	8.31518	4.36277	0.359131	0.368173	1.35517	2.57148	3.83934	1.15315	0.077693	0.322791	0.484755	0.593923	0.298826	0.0445307	0.0567358	0.0355369	0.0239303	0.0671527
636	BICD1	0.361461	0.086714	4.16842	3.06716e-05	0.0213567	1.29241	4.05237	0.398964	0.852392	3.03594	2.05943	2.4305	1.25215	0.161002	0.641656	0.568797	0.382914	0.224292	0.0356764	0.0446701	0.0762815	0.0248206	0.0320856
11247	NXPH4	0.37446	0.089468	4.18541	2.84651e-05	0.0213567	0	0.276912	0.991255	2.01591	2.26298	1.33118	1.7933	1.90307	0.408631	0.409238	0.366827	0.302115	0.40937	0.0410885	0.0327033	0.0759364	0.0283818	0.0462727
64895	PAPOLG	-0.415742	0.099775	-4.16679	3.08917e-05	0.0213567	15.0149	4.70671	0.318736	-0.71878	-1.08752	-3.68644	-1.43166	-2.92208	-0.165257	-0.344927	-0.727717	-0.257227	-0.489658	0.0528604	0.100596	0.0389683	0.0322812	0.0280803
9326	ZNHIT3	-0.413953	0.0994563	-4.16216	3.1525e-05	0.0213567	6.79908	4.2918	0.367953	-3.85891	-0.54308	-2.35741	-1.04066	-1.2691	-0.671869	-0.117088	-0.427318	-0.304227	-0.348657	0.0303138	0.0464836	0.0328574	0.0854624	0.0754746
8239	USP9X	-0.449285	0.109122	-4.11725	3.83421e-05	0.0248457	0	1.1599	0.884656	-1.6247	-1.58978	-3.06898	-0.712189	-1.73747	-0.416756	-0.485089	-0.561244	-0.20252	-0.43748	0.065799	0.0931045	0.0334438	0.080862	0.0633991
115509	ZNF689	-0.384531	0.0944178	-4.07265	4.64803e-05	0.0288643	0	1.06467	0.899837	-1.66809	-1.90887	-2.65991	-0.786159	-1.87928	-0.341207	-0.423775	-0.521059	-0.203545	-0.361621	0.0418403	0.0492855	0.0383741	0.0670347	0.0370277
7423	VEGFB	-0.357392	0.0884624	-4.04005	5.34395e-05	0.0300014	0	2.90798	0.57334	-2.29283	-0.746318	-1.94172	-1.03095	-2.92964	-0.400251	-0.138877	-0.369824	-0.273341	-0.594318	0.0304734	0.034627	0.0362758	0.0702972	0.0411536
5016	OVGP1	-0.447808	0.110951	-4.03609	5.43503e-05	0.0300014	26.4195	5.43622	0.245392	-3.19078	-1.16588	-3.37226	-0.423456	-2.27908	-0.613851	-0.301514	-0.751409	-0.0948147	-0.415746	0.0370112	0.0668813	0.049649	0.0501344	0.0332765
9058	SLC13A2	0.356593	0.088307	4.03811	5.38842e-05	0.0300014	0	2.3903	0.66438	0.406012	1.04594	2.05445	1.97813	3.05025	0.0893487	0.269369	0.479604	0.352102	0.46735	0.0484282	0.0663257	0.054497	0.0316831	0.0234755
9325	TRIP4	-0.350625	0.0877471	-3.99585	6.44619e-05	0.0330058	0	3.47422	0.48181	-2.47917	-0.356478	-3.31243	-1.25707	-0.784405	-0.434122	-0.0877614	-0.514063	-0.343557	-0.154258	0.0306627	0.0606097	0.0240846	0.0746932	0.0386738
83549	UCK1	0.382956	0.0960212	3.98825	6.65627e-05	0.0330058	9.62606	4.42605	0.351406	1.11947	2.3101	1.90745	1.04731	3.25307	0.247815	0.605561	0.338538	0.186104	0.683153	0.0490033	0.0687154	0.0315	0.0315767	0.0441012
835	CASP2	-0.393678	0.0988914	-3.98091	6.86514e-05	0.0330058	0	1.76824	0.778287	-2.57739	-0.637013	-2.60602	-0.971438	-1.68289	-0.608201	-0.193752	-0.462107	-0.313403	-0.297144	0.0556843	0.0925118	0.0314435	0.104082	0.0311761
8528	DDO	0.33122	0.0831523	3.98329	6.79685e-05	0.0330058	0	1.83204	0.766616	1.7217	2.80903	1.10287	1.31395	1.97508	0.307229	0.515336	0.372045	0.198393	0.355535	0.0318428	0.0336564	0.113801	0.0227981	0.0324037
29105	CFAP20	-0.370827	0.0934892	-3.96652	7.29297e-05	0.033967	0	2.41006	0.660809	-1.22327	-1.894	-2.33084	-0.80901	-2.64053	-0.216014	-0.389739	-0.470378	-0.210709	-0.599004	0.0311829	0.0423435	0.0407258	0.0678357	0.051461
1479	CSTF3	-0.367378	0.0935004	-3.92916	8.52427e-05	0.0384987	0	2.83274	0.586195	-2.25487	-0.525444	-3.1509	-1.28392	-1.15492	-0.446402	-0.125797	-0.568964	-0.292732	-0.24897	0.0391929	0.0573173	0.0326062	0.0519831	0.0464721
4159	MC3R	0.363981	0.0930154	3.91313	9.11093e-05	0.0387969	0	2.28872	0.682824	0.576083	2.82474	1.01247	1.96856	2.0952	0.132184	0.584882	0.287392	0.339799	0.401078	0.0526485	0.0428724	0.0805722	0.0297952	0.0366443
375323	LHFPL4	0.369504	0.0943716	3.91541	9.0249e-05	0.0387969	0	2.73048	0.603892	0.666281	0.885999	0.124673	3.08616	2.70039	0.176622	0.250512	0.037908	0.462019	0.492123	0.0702705	0.0799451	0.0924522	0.0224121	0.0332121
83887	TTLL2	0.323297	0.0829945	3.8954	9.80367e-05	0.0405872	0	2.71217	0.607086	1.1814	1.84094	0.167597	1.545	3.26902	0.203879	0.373612	0.075095	0.235796	0.520742	0.0297818	0.0411874	0.200766	0.0232925	0.0253753
10492	SYNCRIP	-0.336904	0.0866641	-3.88748	0.000101292	0.0408014	0	0.738437	0.946506	-1.20157	-1.47022	-2.77375	-0.925551	-1.92231	-0.223246	-0.323947	-0.410113	-0.26344	-0.38074	0.0345202	0.0485495	0.0218611	0.0810146	0.0392293
349667	RTN4RL2	0.341803	0.0883236	3.8699	0.000108881	0.0427041	0	3.33535	0.503351	0.477	1.88793	1.20075	1.58767	3.24918	0.113954	0.432118	0.287185	0.242445	0.581581	0.0570719	0.052388	0.0572033	0.0233189	0.0320386
2019	EN1	0.367639	0.0954114	3.8532	0.000116586	0.0436381	0	0.822332	0.935429	1.80639	1.57279	1.37023	1.55375	2.37509	0.379055	0.381416	0.495673	0.257417	0.46524	0.0440331	0.0588107	0.130859	0.0274482	0.0383702
6135	RPL11	-0.316665	0.0822062	-3.85208	0.000117118	0.0436381	0	2.75055	0.600399	-2.24012	-1.61715	-2.95549	-0.905176	-0.633678	-0.401093	-0.271919	-0.468751	-0.348422	-0.107247	0.0320588	0.0282735	0.0251551	0.148165	0.0286437
283150	FOXR1	0.325108	0.0856471	3.7959	0.00014711	0.0523179	0	2.80986	0.590131	1.57842	1.76615	-0.468663	2.26183	2.50449	0.29304	0.35818	-0.150223	0.342269	0.460375	0.0344675	0.0411287	0.102743	0.0228989	0.0337897
1314	COPA	-0.346034	0.0911731	-3.79535	0.000147434	0.0523179	0	3.08577	0.543576	-2.17266	-1.56502	-0.519406	-0.992738	-3.01089	-0.36725	-0.320391	-0.10037	-0.370026	-0.574543	0.028572	0.0419103	0.0373416	0.13893	0.036413
56133	PCDHB2	0.342806	0.0906362	3.78222	0.000155434	0.0538741	0	3.03102	0.552648	0.996533	2.68181	0.978234	1.04538	2.66482	0.230753	0.598035	0.288345	0.173188	0.450271	0.053618	0.0497276	0.0868841	0.0274467	0.0285504
55321	TMEM74B	0.362271	0.0962546	3.76368	0.000167432	0.0567139	0	3.94363	0.413688	0.116825	1.18897	1.98906	2.64994	2.38811	0.0254089	0.276135	0.615887	0.436208	0.522133	0.0473045	0.0539389	0.0958755	0.0270966	0.0478026
91807	MYLK3	0.353758	0.0945894	3.73993	0.000184072	0.0609647	16.0241	4.76327	0.312461	1.71476	0.27349	2.69184	2.65882	2.04303	0.319756	0.0535676	0.768552	0.439338	0.363153	0.0347723	0.0383639	0.0815172	0.0273036	0.031596
51504	TRMT112	-0.342915	0.0927462	-3.69735	0.000217866	0.0690866	0	2.95012	0.566208	-1.16741	0.245096	-2.73906	-0.675058	-2.69062	-0.248038	0.0737415	-0.435858	-0.241197	-0.450129	0.0451431	0.0905214	0.0253214	0.127662	0.0279879
24140	FTSJ1	-0.308481	0.0833291	-3.70196	0.000213938	0.0690866	0	3.63977	0.456947	-1.24557	-0.62867	-2.65783	-0.972886	-2.71791	-0.231108	-0.122279	-0.486776	-0.178975	-0.5032	0.0344267	0.0378319	0.033543	0.0338424	0.0342775
5324	PLAG1	-0.422684	0.114654	-3.6866	0.000227273	0.0705684	5.60311	4.23743	0.374826	-1.52423	-1.13057	-2.82762	-0.74114	-2.5278	-0.418416	-0.32412	-0.790555	-0.148973	-0.594568	0.0753558	0.0821896	0.0781669	0.040403	0.0553246
7403	KDM6A	-0.423733	0.115756	-3.66059	0.00025164	0.0709478	0	3.23287	0.519638	-1.46175	-0.645938	-3.23091	-1.01873	-1.61314	-0.352835	-0.195159	-0.789774	-0.271283	-0.407447	0.058264	0.0912839	0.0597526	0.070913	0.0637964
55132	LARP1B	-0.310249	0.0850685	-3.64705	0.000265266	0.0709478	0	2.17261	0.704047	-0.809199	-0.954554	-2.60552	-1.42541	-2.25546	-0.148467	-0.208193	-0.477379	-0.271888	-0.410541	0.0336625	0.0475696	0.033569	0.0363833	0.0331317
3842	TNPO1	-0.386712	0.105815	-3.65459	0.000257594	0.0709478	19.3746	4.96122	0.2913	-1.3485	-1.1754	-1.07506	-1.33223	-3.99587	-0.286399	-0.286368	-0.214406	-0.307423	-0.746308	0.0451065	0.0593576	0.0397752	0.0532489	0.0348829
1028	CDKN1C	-0.419333	0.115019	-3.64578	0.000266578	0.0709478	0	2.55747	0.634375	-1.44453	-0.201597	-1.49232	-1.36463	-3.10365	-0.44566	-0.075196	-0.357282	-0.309443	-0.677237	0.0951815	0.139131	0.0573186	0.0514198	0.0476141
57459	GATAD2B	-0.362891	0.0990099	-3.6652	0.000247146	0.0709478	0	1.62984	0.803419	-1.12836	-0.731782	-2.68843	-0.836894	-2.30798	-0.276098	-0.176028	-0.533476	-0.262159	-0.405229	0.0598726	0.0578626	0.0393759	0.0981268	0.0308275
5689	PSMB1	-0.332651	0.0905563	-3.67341	0.000239332	0.0709478	0	1.75921	0.779936	-2.15368	-2.58079	-1.07593	-0.506894	-1.59367	-0.351941	-0.523659	-0.186129	-0.194262	-0.35649	0.026704	0.041171	0.029927	0.146872	0.0500377
55596	ZCCHC8	-0.321299	0.0878699	-3.65653	0.00025565	0.0709478	0.402273	4.01616	0.403824	-0.276852	-0.799821	-3.28441	-0.31344	-2.42667	-0.0686461	-0.248971	-0.45545	-0.06556	-0.452132	0.0614806	0.0968973	0.0192295	0.0437492	0.0347144
25942	SIN3A	-0.392749	0.107557	-3.65155	0.000260666	0.0709478	27.8289	5.54239	0.236029	-4.0482	-0.416534	-1.81611	-1.17936	-2.04131	-0.704219	-0.094396	-0.280338	-0.357301	-0.447006	0.0302615	0.0513579	0.0238276	0.0917863	0.0479521
284695	ZNF326	-0.339491	0.0934495	-3.63288	0.000280273	0.0720204	0	3.46568	0.483116	-1.72786	-2.07	-2.07088	-0.506039	-2.20193	-0.395069	-0.500064	-0.411469	-0.0856091	-0.519334	0.0522789	0.0583596	0.0394788	0.0286201	0.0556271
8209	C21orf33	-0.334944	0.0921737	-3.63383	0.00027924	0.0720204	18.0827	4.88297	0.299517	-2.99783	0.530585	-2.49725	-0.850613	-2.56506	-0.468355	0.142788	-0.319948	-0.227683	-0.520154	0.0244082	0.0724227	0.0164147	0.0716469	0.0411215
54888	NSUN2	-0.353962	0.097896	-3.6157	0.00029954	0.0721599	0	1.93218	0.748232	-0.935088	-1.89293	-2.92883	-1.06927	-0.909091	-0.193815	-0.42284	-0.514197	-0.347169	-0.208032	0.0429607	0.0498979	0.0308226	0.105415	0.0523654
80329	ULBP1	0.342922	0.0945998	3.62498	0.000288983	0.0721599	0	2.46683	0.650585	1.43137	2.16499	1.98479	1.00406	1.98085	0.325713	0.485114	0.611431	0.163511	0.402095	0.0517802	0.0502081	0.0948998	0.0265201	0.0412054
10236	HNRNPR	-0.377964	0.104361	-3.62171	0.000292666	0.0721599	0	0.816919	0.936166	-1.65037	-2.04924	-1.95649	-0.541452	-1.69986	-0.365058	-0.544974	-0.371529	-0.172338	-0.383589	0.0489281	0.0707238	0.0360602	0.101308	0.0509222
29106	SCG3	0.418454	0.11575	3.61514	0.000300182	0.0721599	27.64	5.52792	0.237286	2.33427	-0.0406382	1.00324	1.90993	4.04606	0.588146	-0.0113284	0.331798	0.312868	0.663596	0.0634848	0.0777084	0.109379	0.026834	0.0268995
1656	DDX6	-0.348946	0.0969777	-3.59821	0.000320421	0.0758024	0	1.58869	0.810823	-0.189996	-1.82436	-1.74167	-1.67	-2.31281	-0.0544055	-0.523812	-0.364236	-0.317342	-0.412434	0.081997	0.0824385	0.0437357	0.0361097	0.0318002
9208	LRRFIP1	0.404957	0.113102	3.58046	0.000342986	0.0798728	12.9042	4.59264	0.331703	0.517729	0.24156	3.61341	-0.280177	2.95987	0.167267	0.0821883	0.58607	-0.113586	0.498385	0.104379	0.115763	0.0263066	0.164355	0.0283521
10509	SEMA4B	0.327583	0.0917914	3.56877	0.000358658	0.0822376	0	3.47635	0.481484	1.66765	1.99333	1.42216	-0.59181	2.66181	0.323714	0.40608	0.289939	-0.183756	0.459081	0.0376801	0.0415015	0.0415636	0.0964089	0.0297456
23259	DDHD2	-0.320042	0.0898632	-3.56143	0.000368841	0.0832911	0	2.19002	0.700857	-0.611296	-0.981808	-2.86265	-0.936588	-2.11287	-0.143688	-0.266274	-0.49478	-0.183577	-0.369858	0.0552504	0.0735535	0.0298737	0.0384184	0.0306425
79871	RPAP2	-0.339959	0.095902	-3.54486	0.000392818	0.0859429	0	0.448056	0.978357	-1.75939	-1.55575	-2.15718	-1.24166	-1.14155	-0.429827	-0.420517	-0.346279	-0.289275	-0.248781	0.0596847	0.0730608	0.025768	0.054277	0.0474946
409	ARRB2	0.332696	0.0943018	3.52799	0.000418724	0.0859429	0	3.35202	0.500733	2.66098	0.643982	1.85079	-0.23427	2.19612	0.540135	0.154276	0.371691	-0.0735778	0.366919	0.0412024	0.0573921	0.040332	0.0986417	0.0279143
152189	CMTM8	-0.396955	0.112561	-3.52659	0.00042095	0.0859429	0	1.14689	0.886763	-1.22981	-0.821439	-1.74807	-1.17399	-2.63866	-0.326503	-0.264159	-0.394653	-0.297751	-0.591436	0.0704849	0.103414	0.0509702	0.0643248	0.0502398
1877	E4F1	-0.394659	0.111442	-3.5414	0.000398013	0.0859429	32.4431	5.92094	0.205131	-0.478461	-1.51292	-3.99035	-0.980146	-2.55075	-0.0973533	-0.291684	-0.700659	-0.275613	-0.501873	0.0414008	0.03717	0.0308312	0.0790709	0.0387127
79048	SECISBP2	-0.330975	0.0933731	-3.54465	0.000393138	0.0859429	0	2.56114	0.633722	-1.00075	-1.00933	-1.71352	-1.07703	-3.00155	-0.195717	-0.221795	-0.307492	-0.313421	-0.600534	0.0382475	0.0482874	0.0322026	0.0846843	0.0400299
144406	WDR66	0.308346	0.0872986	3.53209	0.000412291	0.0859429	0	2.31929	0.677259	1.70183	1.50465	-0.147313	2.69826	1.52723	0.385489	0.272825	-0.0432201	0.443221	0.267357	0.051309	0.0328777	0.086077	0.0269819	0.030646
23219	FBXO28	-0.325778	0.092305	-3.52936	0.000416564	0.0859429	0	2.58113	0.63017	-0.380757	-1.27194	-2.91407	-0.954805	-1.96755	-0.0795961	-0.301095	-0.482477	-0.234382	-0.405313	0.0437007	0.0560364	0.0274128	0.0602588	0.0424356
6430	SRSF5	-0.326357	0.0928101	-3.5164	0.000437445	0.0881037	0	1.23162	0.872865	-0.880053	-1.52577	-2.87699	-0.59599	-1.36453	-0.185728	-0.355489	-0.447206	-0.254611	-0.256257	0.0445388	0.0542841	0.0241623	0.182505	0.0352685
11137	PWP1	-0.324874	0.0927819	-3.50149	0.000462673	0.0907325	14.967	4.70405	0.319033	-1.06909	-0.805628	-2.10137	-0.992397	-3.4835	-0.182752	-0.155179	-0.335277	-0.289262	-0.66975	0.0292211	0.0371018	0.0254566	0.0849594	0.0369653
84690	SPATA22	0.388142	0.110758	3.50442	0.000457605	0.0907325	10.5072	4.46963	0.346163	-0.0520518	2.27997	2.28137	2.7097	0.952501	-0.014362	0.636323	0.634423	0.459185	0.214788	0.0761306	0.0778925	0.0773332	0.0287165	0.0508496
51451	LCMT1	-0.303422	0.0871317	-3.48234	0.000497057	0.092619	0	1.45741	0.834159	-2.41941	-0.361603	-2.04145	-0.851097	-1.64557	-0.368307	-0.0804087	-0.366586	-0.220442	-0.34749	0.0231741	0.0494474	0.0322459	0.0670859	0.0445916
51649	MRPS23	-0.335964	0.0962195	-3.49164	0.000480064	0.092619	0.853773	4.03444	0.401364	-2.78111	-0.151628	-2.1607	-1.91896	-0.493821	-0.542782	-0.0333111	-0.412882	-0.434649	-0.126907	0.0380905	0.0482635	0.0365143	0.0513035	0.0660441
79705	LRRK1	0.29355	0.0842979	3.48229	0.00049715	0.092619	0	2.91406	0.572309	1.29888	2.27728	1.17852	0.887526	2.44759	0.238792	0.467347	0.246976	0.138103	0.506821	0.0337987	0.0421159	0.0439175	0.0242128	0.0428778
476	ATP1A1	-0.371339	0.106496	-3.48688	0.000488683	0.092619	0	2.44057	0.655308	-2.34254	-0.277489	-0.517734	-0.81867	-2.84538	-0.431402	-0.0887543	-0.147723	-0.265231	-0.546567	0.0339149	0.102302	0.0814108	0.104962	0.0368983
11224	RPL35	-0.303763	0.0876638	-3.46509	0.000530045	0.0975282	0	2.81868	0.588613	-1.74967	-0.405553	-3.24333	-0.867991	-0.571979	-0.35305	-0.0916847	-0.438725	-0.33557	-0.11519	0.0407153	0.0511091	0.018298	0.149464	0.0405574
5122	PCSK1	0.392822	0.113488	3.46134	0.00053749	0.097692	42.1991	6.92031	0.14016	-0.0147367	3.48645	1.66958	2.4404	2.73276	-0.00275265	0.669388	0.529681	0.379522	0.462504	0.0348902	0.0368629	0.10065	0.0241853	0.0286436
9380	GRHPR	-0.379142	0.109745	-3.45477	0.000550771	0.0988999	17.2341	4.83291	0.304876	0.00392369	-1.35627	-3.26041	-0.925219	-2.61533	0.0009656	-0.387066	-0.611175	-0.216495	-0.507681	0.0605628	0.0814471	0.0351387	0.0547531	0.0376816
10725	NFAT5	-0.496185	0.143832	-3.44975	0.00056111	0.0991339	52.2075	8.36951	0.0789428	-1.28462	-3.38013	-4.50344	-0.721359	-1.47032	-0.3804	-0.922163	-0.748122	-0.172649	-0.264591	0.087687	0.0744301	0.0275967	0.057283	0.032384
55086	CXorf57	0.322667	0.0935891	3.4477	0.000565377	0.0991339	0	3.69411	0.448983	1.2938	1.95863	1.63559	2.66779	0.527579	0.298226	0.490104	0.622316	0.447869	0.0867472	0.0531319	0.0626142	0.144767	0.0281837	0.0270356
25963	TMEM87A	-0.318039	0.092434	-3.44071	0.000580186	0.0993919	0.586989	4.02362	0.402819	-0.979581	-1.14824	-3.53506	-0.703798	-0.830655	-0.182753	-0.238522	-0.60338	-0.252926	-0.169966	0.0348054	0.0431513	0.0291332	0.129149	0.0418682
57733	GBA3	0.303144	0.088039	3.4433	0.000574672	0.0993919	1.99649	4.08149	0.39509	2.52527	0.960386	0.0910112	2.98544	0.329103	0.456527	0.207682	0.0277673	0.448208	0.0656277	0.0326828	0.0467632	0.0930843	0.0225395	0.0397658
2348	FOLR1	0.308063	0.0897084	3.43405	0.000594631	0.0995774	0	2.12327	0.713099	1.11574	2.20296	1.9028	1.01458	1.7799	0.225353	0.405012	0.562353	0.164212	0.39273	0.0407948	0.0338005	0.0873437	0.0261963	0.0486851
54432	YIPF1	0.320125	0.093218	3.43415	0.000594416	0.0995774	0	3.93096	0.415431	1.78974	0.377844	2.20122	-0.379548	2.71826	0.346877	0.102866	0.354675	-0.116107	0.535547	0.037564	0.0741173	0.0259617	0.0935805	0.0388161
124857	WFIKKN2	0.379672	0.110867	3.42457	0.00061577	0.101971	40.1154	6.67951	0.153825	2.95683	0.0901273	1.69554	3.99408	1.16357	0.483768	0.0181941	0.452899	0.627289	0.232106	0.0267683	0.0407518	0.0713488	0.0246662	0.0397916
92747	BPIFB1	0.302084	0.0883102	3.42072	0.000624561	0.102291	2.29283	4.09387	0.393452	0.490773	1.71245	1.60107	3.15714	0.632717	0.10353	0.396245	0.261724	0.580952	0.130897	0.0445008	0.0535418	0.0267217	0.0338605	0.0427994
114932	MRFAP1L1	-0.391178	0.114646	-3.41206	0.000644745	0.103326	0	2.38703	0.664972	-0.822904	-0.0648416	-3.26636	-1.03249	-1.2699	-0.249169	-0.0241493	-0.572706	-0.303325	-0.341218	0.0916834	0.138707	0.0307422	0.086307	0.0721982
29126	CD274	0.338654	0.0991929	3.4141	0.000639933	0.103326	0	3.39883	0.493427	-0.310113	1.85381	0.698987	2.40924	2.28673	-0.0931899	0.462742	0.175054	0.391852	0.501819	0.0903024	0.0623087	0.06272	0.0264536	0.0481578
4176	MCM7	-0.339408	0.099622	-3.40696	0.000656912	0.103849	0	2.69173	0.610662	-2.12145	-0.514804	-0.83868	-1.02612	-2.78877	-0.492752	-0.168952	-0.153318	-0.278184	-0.514231	0.0539501	0.107706	0.033419	0.0734972	0.034001
9791	PTDSS1	-0.322295	0.0949716	-3.39359	0.000689817	0.103849	0	2.75817	0.599075	-2.11044	-0.450606	-2.93502	-0.962283	-0.278095	-0.411069	-0.114113	-0.455499	-0.303856	-0.0667251	0.0379386	0.0641323	0.0240855	0.0997084	0.0575693
23041	MON2	-0.314597	0.0924147	-3.40419	0.000663611	0.103849	0	3.65055	0.455358	-0.871695	-1.55107	-3.18335	-0.831457	-1.11728	-0.169261	-0.321596	-0.642023	-0.235084	-0.203272	0.0377039	0.0429891	0.0406754	0.0799403	0.0331004
159195	USP54	0.308495	0.0907908	3.39787	0.000679133	0.103849	0	1.4861	0.829102	1.43663	2.26368	0.809044	1.82573	1.3622	0.301848	0.547982	0.164581	0.30536	0.292519	0.0441458	0.0586006	0.0413825	0.0279736	0.0461131
79693	YRDC	-0.324632	0.0955928	-3.39599	0.000683816	0.103849	0	1.90491	0.753242	-1.76895	-1.93314	-2.46636	-0.380288	-0.586417	-0.308532	-0.397734	-0.494675	-0.151924	-0.125558	0.0304208	0.042331	0.0402278	0.159599	0.045843
80204	FBXO11	-0.365591	0.107602	-3.39761	0.000679768	0.103849	0	3.87946	0.422564	-0.142179	-1.27646	-1.04848	-0.960596	-3.42806	-0.0321664	-0.325358	-0.339544	-0.343846	-0.58705	0.0511838	0.0649694	0.104874	0.128128	0.029326
5058	PAK1	0.330265	0.0974308	3.38974	0.000699591	0.104267	0	2.38588	0.665181	1.67537	1.54063	1.72654	-0.32749	2.36804	0.288895	0.333033	0.398777	-0.113544	0.491133	0.0297345	0.0467278	0.0533466	0.120207	0.043015
221908	PPP1R35	-0.299782	0.088601	-3.3835	0.000715677	0.105453	0	3.87968	0.422535	-1.03782	0.172023	-3.25155	-0.817494	-1.72634	-0.218745	0.0387782	-0.473092	-0.247677	-0.33183	0.0444254	0.0508163	0.0211695	0.0917911	0.0369469
79415	C17orf62	0.333053	0.0985013	3.3812	0.0007217	0.105453	0	2.53875	0.637711	0.894476	1.63925	2.80178	-0.213515	1.60888	0.195504	0.383677	0.500858	-0.0802411	0.318565	0.0477722	0.0547826	0.0319567	0.141234	0.0392054
57215	THAP11	-0.303902	0.0901432	-3.37133	0.00074806	0.108244	0	2.54213	0.637109	-0.687001	-2.29784	-0.841174	-1.05671	-2.5163	-0.130961	-0.420084	-0.163913	-0.32281	-0.47073	0.0363389	0.033422	0.0379713	0.0933217	0.0349962
10584	COLEC10	0.302921	0.0900331	3.36455	0.000766694	0.109437	0	3.70113	0.447961	0.393215	0.499132	1.25588	2.0516	2.97175	0.0874151	0.101566	0.478578	0.326115	0.521139	0.0494211	0.0414061	0.145214	0.0252672	0.0307527
9147	NEMF	-0.327599	0.0974127	-3.363	0.000770994	0.109437	0	0.563418	0.967041	-1.25544	-1.62086	-2.27227	-0.673962	-1.43264	-0.304897	-0.432228	-0.368052	-0.176934	-0.307255	0.0589816	0.0711109	0.026236	0.0689211	0.0459967
5588	PRKCQ	-0.359262	0.106975	-3.35837	0.000784024	0.110237	3.26596	4.13505	0.388037	-1.4706	-3.47769	-0.605682	-1.1203	-0.373953	-0.246196	-0.67203	-0.253337	-0.37168	-0.0980055	0.0280268	0.0373419	0.174947	0.110071	0.068686
123775	C16orf46	0.26751	0.0798153	3.35162	0.000803399	0.111905	0	3.84989	0.426703	1.1565	2.33528	0.637344	2.45868	1.3568	0.252737	0.562147	0.0861445	0.381362	0.286203	0.0477576	0.0579457	0.0182687	0.0240587	0.0444959
84572	GNPTG	-0.26858	0.0802567	-3.34651	0.000818359	0.112934	0	1.29725	0.861841	-1.84942	-0.707673	-2.76686	-0.428155	-0.858119	-0.333297	-0.182173	-0.340295	-0.106628	-0.164722	0.032478	0.0662681	0.0151264	0.0620209	0.0368476
4324	MMP15	-0.308205	0.0924112	-3.33514	0.000852557	0.116573	0	2.93856	0.56816	-1.11976	0.382002	-1.3968	-2.05991	-2.54316	-0.337521	0.113979	-0.250291	-0.352023	-0.468447	0.0908548	0.089026	0.0321086	0.0292041	0.0339293
1983	EIF5	-0.39646	0.118966	-3.33255	0.000860536	0.116595	0.185847	4.00745	0.404999	-0.743148	-1.29923	-3.19606	-1.09518	-1.216	-0.181547	-0.36742	-0.867035	-0.3204	-0.301557	0.0596801	0.0799747	0.0735941	0.0855884	0.0614999
10140	TOB1	-0.411124	0.123658	-3.32467	0.00088522	0.117249	0	1.47851	0.830441	-0.995881	-2.08314	-1.12346	-1.03675	-2.20538	-0.238557	-0.615964	-0.311864	-0.368049	-0.558023	0.0573813	0.0874327	0.0770573	0.126028	0.0640231
7398	USP1	-0.335474	0.100797	-3.3282	0.000874096	0.117249	0	0.736599	0.94674	-2.12166	-1.01595	-2.06215	-1.04609	-0.965986	-0.46972	-0.275467	-0.370239	-0.230254	-0.270457	0.0490147	0.0735183	0.0322347	0.0484482	0.0783888
4360	MRC1	0.293155	0.0882067	3.3235	0.000888966	0.117249	0	0.765195	0.943052	1.01243	1.1853	0.449045	2.43793	1.7988	0.20482	0.249554	0.145208	0.374597	0.33054	0.0409274	0.0443272	0.104568	0.0236094	0.0337661
27087	B3GAT1	0.287685	0.086757	3.31598	0.000913215	0.119391	0	2.07198	0.722522	1.29009	2.93437	0.118349	1.29311	1.05199	0.248211	0.485065	0.0684682	0.211211	0.196104	0.0370172	0.0273255	0.334695	0.0266785	0.0347492
5251	PHEX	0.298204	0.09014	3.30823	0.000938886	0.120349	0	2.55881	0.634137	0.513516	0.269111	2.40575	1.62959	2.17345	0.119125	0.0746136	0.541506	0.276713	0.357006	0.0538142	0.0768728	0.0506648	0.028834	0.0269806
2959	GTF2B	-0.337447	0.102056	-3.30648	0.000944772	0.120349	0	1.69924	0.790856	-1.16386	-0.896668	-2.47225	-0.744462	-1.9512	-0.246471	-0.195223	-0.501239	-0.225151	-0.468359	0.0448462	0.0474023	0.0411059	0.0914671	0.0576175
147744	TMEM190	0.266211	0.0804763	3.30794	0.000939833	0.120349	0	2.62561	0.622294	0.2033	2.15145	0.765223	2.48983	1.45369	0.0395007	0.422398	0.194088	0.369801	0.226758	0.0377516	0.0385461	0.064331	0.0220595	0.0243323
1629	DBT	-0.326741	0.099177	-3.29452	0.000985897	0.122326	0	2.83161	0.586388	-1.98867	-0.180322	-0.776159	-1.63474	-2.53443	-0.427639	-0.0463961	-0.170386	-0.360863	-0.521013	0.046241	0.0662008	0.0481909	0.0487291	0.0422606
84365	NIFK	-0.320284	0.0973444	-3.29022	0.0010011	0.122326	0	1.74338	0.782823	-1.3552	-0.818508	-2.89731	-1.19142	-0.498491	-0.296212	-0.223968	-0.471446	-0.302775	-0.117526	0.0477746	0.0748728	0.0264773	0.0645819	0.055585
56905	C15orf39	0.337305	0.102519	3.29015	0.00100133	0.122326	0	3.98586	0.407923	1.13111	1.60877	1.18087	0.0258427	3.09003	0.268408	0.412327	0.20504	0.00916603	0.673571	0.0563098	0.0656893	0.0301489	0.125802	0.047516
9169	SCAF11	-0.298422	0.0904751	-3.29839	0.000972414	0.122326	0	2.62649	0.622138	-0.64698	-0.870354	-3.27173	-0.829051	-0.968611	-0.154057	-0.261629	-0.486953	-0.180944	-0.185297	0.0567001	0.0903607	0.0221523	0.0476349	0.0365964
9180	OSMR	0.357744	0.108713	3.29071	0.000999347	0.122326	28.4313	5.58904	0.232013	0.368047	2.77243	2.68286	1.62162	1.57898	0.0795711	0.643129	0.73815	0.284851	0.25946	0.0467417	0.0538114	0.0756996	0.0308558	0.0270015
23224	SYNE2	-0.321378	0.0978935	-3.28294	0.00102732	0.124264	16.7128	4.80266	0.308151	-0.222604	-2.87498	-2.32176	-1.09131	-1.64519	-0.0439749	-0.611015	-0.496111	-0.215106	-0.299308	0.039025	0.0451682	0.0456587	0.0388515	0.0330983
5295	PIK3R1	-0.323714	0.0986588	-3.28114	0.00103387	0.124264	17.8315	4.86804	0.301107	-0.891074	-3.39932	-1.05798	-0.938018	-1.87801	-0.143391	-0.693208	-0.252563	-0.216321	-0.353868	0.0258952	0.0415857	0.056988	0.0531832	0.0355046
23119	HIC2	-0.360336	0.110591	-3.25828	0.00112091	0.131502	23.2948	5.21477	0.265962	-1.04637	-1.14945	-3.3513	-0.613797	-2.21158	-0.207434	-0.268904	-0.744351	-0.130809	-0.483789	0.0392997	0.0547291	0.0493321	0.045418	0.0478527
7068	THRB	-0.28845	0.0885288	-3.25827	0.00112095	0.131502	0	1.96222	0.742707	-0.599177	-1.884	-0.774435	-1.2914	-2.53034	-0.120732	-0.403865	-0.194063	-0.230019	-0.435509	0.040601	0.0459528	0.0627938	0.0317253	0.0296236
25897	RNF19A	-0.434984	0.133514	-3.25795	0.00112219	0.131502	18.4457	4.90471	0.297216	-0.765068	-1.87719	-0.603174	-1.36696	-3.41496	-0.192193	-0.516292	-0.173119	-0.381773	-0.884876	0.0631068	0.0756442	0.082377	0.0780005	0.0671418
1581	CYP7A1	0.301255	0.0925191	3.25614	0.00112938	0.131502	2.18703	4.08944	0.394037	0.28852	1.58228	-0.00962503	1.59941	3.14966	0.0637503	0.393591	-0.00293951	0.266193	0.520475	0.0488216	0.0618764	0.0932708	0.0276994	0.027307
89884	LHX4	0.303442	0.0934275	3.24789	0.00116264	0.133731	2.40762	4.09868	0.392816	0.104938	1.66437	0.998533	1.3787	3.04552	0.0255938	0.418532	0.244984	0.212394	0.589665	0.0594852	0.0632349	0.0601939	0.0237327	0.0374877
8226	PUDP	-0.379835	0.117256	-3.23935	0.00119801	0.133731	24.8452	5.32235	0.255792	-2.36824	-0.995382	-3.23085	-0.260444	-1.49175	-0.530314	-0.262934	-0.722181	-0.0561	-0.322475	0.0501434	0.0697774	0.0499642	0.0463979	0.0467302
131177	FAM3D	0.325443	0.100498	3.23832	0.00120236	0.133731	0	3.80798	0.432617	1.55887	1.60795	-0.551961	0.89573	2.85869	0.386402	0.439133	-0.236002	0.160316	0.500364	0.0614408	0.0745847	0.182816	0.032033	0.0306364
51138	COPS4	-0.284039	0.0876484	-3.24067	0.0011925	0.133731	0	2.97212	0.562501	-0.419077	-0.923839	-2.66945	-1.18697	-1.9774	-0.073562	-0.188241	-0.438627	-0.310208	-0.422063	0.0308119	0.041518	0.026999	0.0683015	0.045558
23569	PADI4	0.432192	0.133309	3.24203	0.00118682	0.133731	0	3.86272	0.424903	2.74764	0.64904	2.41244	-0.0248226	0.763041	0.625572	0.189733	0.747889	-0.0103821	0.252177	0.0518365	0.0854556	0.0961086	0.174934	0.109223
152405	C3orf30	0.304577	0.0938859	3.24412	0.00117814	0.133731	0	3.99882	0.406166	0.286988	0.22072	0.871561	2.93792	2.23631	0.0603328	0.0548958	0.257509	0.467657	0.459033	0.0441955	0.0618576	0.0872952	0.0253382	0.0421332
55294	FBXW7	-0.362129	0.111954	-3.23462	0.00121805	0.134473	38.4347	6.49717	0.164969	-0.920243	-3.338	-3.1459	-1.42382	-0.379889	-0.184245	-0.634622	-0.553182	-0.342086	-0.0705191	0.0400855	0.0361459	0.0309206	0.0577249	0.0344588
54764	ZRANB1	-0.383994	0.118986	-3.22722	0.00125001	0.136986	0	3.10795	0.539926	0.259841	-1.28937	-2.22575	-1.55255	-2.10441	0.0758022	-0.426775	-0.441347	-0.513182	-0.540305	0.0851036	0.109558	0.0393195	0.109258	0.0659203
57619	SHROOM3	0.31325	0.0975049	3.21266	0.00131513	0.141013	0	3.48147	0.480702	-0.233088	1.60844	0.66869	2.24551	2.38155	-0.0593583	0.445229	0.165789	0.38751	0.45947	0.0648522	0.076623	0.0614702	0.0297806	0.0372218
8881	CDC16	-0.292803	0.0911383	-3.21274	0.00131477	0.141013	0	2.38673	0.665027	-0.428721	-1.30584	-1.86201	-1.09338	-2.48129	-0.0858855	-0.298905	-0.274584	-0.369376	-0.533378	0.0401319	0.0523945	0.0217462	0.114129	0.0462078
7288	TULP2	-0.286408	0.0891096	-3.21411	0.00130849	0.141013	0	3.94282	0.4138	-1.65009	0.33872	-1.24453	-2.19679	-2.24968	-0.336179	0.0686312	-0.359916	-0.355421	-0.43035	0.0415075	0.0410545	0.083635	0.0261764	0.0365933
3964	LGALS8	-0.297231	0.0926552	-3.20793	0.00133693	0.141123	0	1.6062	0.807677	-1.19691	-1.52808	-1.90966	-0.567833	-2.03965	-0.2071	-0.361552	-0.531687	-0.134894	-0.346758	0.0299389	0.0559822	0.0775173	0.0564346	0.028903
146198	ZFP90	-0.287709	0.0897326	-3.20629	0.00134457	0.141123	0	3.94711	0.413211	-1.89846	-1.18903	-2.7293	-1.23684	0.480245	-0.353398	-0.262918	-0.421803	-0.332611	0.109638	0.0346518	0.0488941	0.0238845	0.0723177	0.0521193
139341	FUNDC1	-0.359764	0.112116	-3.20885	0.00133268	0.141123	5.44357	4.23028	0.375737	-0.647185	-0.571337	-2.81245	-0.753823	-2.44326	-0.146635	-0.188609	-0.606875	-0.171939	-0.62757	0.0513356	0.108978	0.0465618	0.0520245	0.0659758
23114	NFASC	0.298181	0.0936296	3.18469	0.00144912	0.147955	0	3.12922	0.536438	0.195238	1.79492	1.46637	1.14815	2.55794	0.0483741	0.460697	0.503318	0.177533	0.450162	0.0613901	0.0658776	0.117814	0.0239089	0.0309711
11054	OGFR	0.363833	0.114317	3.18266	0.0014593	0.147955	5.06346	4.21334	0.377903	0.802015	2.71267	1.91497	-0.331166	1.79755	0.204009	0.675541	0.444169	-0.107215	0.390575	0.0647046	0.0620167	0.0537985	0.104815	0.0472113
162963	ZNF610	0.300733	0.0944778	3.18311	0.00145701	0.147955	0	2.43399	0.656493	1.693	2.53997	1.42453	0.472267	0.998076	0.326527	0.484768	0.379356	0.0860579	0.271854	0.0371983	0.0364259	0.070917	0.0332052	0.0741896
5436	POLR2G	-0.29027	0.091049	-3.18806	0.00143228	0.147955	14.728	4.69087	0.320511	-1.15338	-0.242072	-3.81834	-0.879304	-1.10902	-0.193409	-0.0517591	-0.527288	-0.28605	-0.209697	0.0281192	0.0457178	0.0190698	0.10583	0.0357521
10575	CCT4	-0.274182	0.0860062	-3.18793	0.00143294	0.147955	0	0.972971	0.913866	-1.2243	-0.94888	-1.61764	-1.37544	-2.05621	-0.25501	-0.267198	-0.213973	-0.283013	-0.474804	0.0433852	0.0792945	0.0174966	0.0423376	0.0533205
3150	HMGN1	-0.383952	0.121028	-3.17241	0.00151177	0.15224	32.6632	5.94029	0.203652	-0.0332972	-2.28909	-3.75677	-1.05261	-1.51808	-0.00693892	-0.541718	-0.623991	-0.407585	-0.307499	0.043428	0.0560043	0.0275884	0.149935	0.0410298
2797	GNRH2	0.25953	0.0819268	3.16783	0.00153579	0.15362	4.08036	4.17016	0.383467	1.77743	0.562882	1.45057	3.03462	-0.0330052	0.273802	0.0977347	0.337534	0.463585	-0.00745562	0.0237295	0.0301484	0.0541448	0.0233372	0.0510275
64919	BCL11B	-0.348574	0.110131	-3.16509	0.00155032	0.15404	0	2.09368	0.718534	-2.35957	-0.395357	-1.57841	-1.64249	-1.09476	-0.446206	-0.0882076	-0.486929	-0.496245	-0.304417	0.0357606	0.0497774	0.0951685	0.0912824	0.077322
29	ABR	-0.281156	0.0890015	-3.159	0.00158312	0.154422	0	1.89369	0.755304	-1.65457	-0.85758	-2.70111	-0.807505	-0.672188	-0.324939	-0.178237	-0.442211	-0.215013	-0.132466	0.0385685	0.0431964	0.0268024	0.070899	0.0388354
4125	MAN2B1	0.323414	0.102391	3.15861	0.00158525	0.154422	0	3.75727	0.439851	0.340571	1.89921	2.59586	-0.0923245	1.80668	0.0830162	0.519195	0.492305	-0.0268636	0.35737	0.0594169	0.0747338	0.0359672	0.0846629	0.0391267
2079	ERH	-0.30275	0.0957389	-3.16224	0.0015656	0.154422	0	1.39049	0.845846	-0.999589	-1.22968	-2.77072	-0.794682	-0.755346	-0.216044	-0.295317	-0.443521	-0.258591	-0.161467	0.0467135	0.0576758	0.0256237	0.105887	0.045696
222166	MTURN	-0.3211	0.102122	-3.14428	0.00166498	0.157762	0	3.21388	0.522692	-0.569528	-0.251079	-2.11403	-1.34927	-2.53442	-0.116959	-0.0679952	-0.40431	-0.497388	-0.519051	0.0421731	0.073339	0.0365768	0.135891	0.0419435
607	BCL9	-0.316978	0.100672	-3.14862	0.00164046	0.157762	1.34884	4.05469	0.398655	-1.57467	-0.463304	-2.99828	-1.51853	-0.359268	-0.362005	-0.115267	-0.637716	-0.314372	-0.0812949	0.0528503	0.0618979	0.0452388	0.042859	0.0512023
2956	MSH6	-0.264616	0.0841918	-3.14302	0.00167217	0.157762	0	1.95308	0.744388	-0.189167	-1.53775	-2.15779	-0.857663	-2.00986	-0.0354573	-0.312831	-0.352874	-0.259885	-0.317115	0.0351335	0.0413854	0.0267436	0.0918185	0.0248946
1603	DAD1	-0.345869	0.11002	-3.1437	0.00166827	0.157762	31.4127	5.83198	0.212052	-2.58094	0.360571	-3.66672	-0.935045	-1.49635	-0.485584	0.0810349	-0.531178	-0.340995	-0.287551	0.0353976	0.0505082	0.0209858	0.132994	0.0369289
7805	LAPTM5	0.380349	0.121016	3.14296	0.00167246	0.157762	25.0288	5.33538	0.254583	1.93213	1.67524	0.0567396	-0.115044	3.85977	0.372307	0.369792	0.0170383	-0.0464074	0.672763	0.0371304	0.0487263	0.0901736	0.162723	0.030381
7011	TEP1	0.42595	0.135859	3.13524	0.00171712	0.160956	48.5675	7.77718	0.10009	1.07649	0.614717	3.45683	0.736632	3.89614	0.258185	0.17318	0.687106	0.145507	0.744553	0.0575235	0.0793678	0.0395086	0.0390182	0.0365193
115653	KIR3DL3	-0.400526	0.127939	-3.13061	0.00174446	0.162496	0.201581	4.00808	0.404914	0.0412593	-1.2494	-2.33911	-0.924974	-2.43748	0.0153922	-0.510281	-0.717815	-0.198013	-0.616459	0.139174	0.166807	0.0941726	0.0458275	0.0639629
11151	CORO1A	0.336533	0.107603	3.12754	0.00176277	0.163053	0	3.22887	0.520281	0.652511	1.94814	1.90443	-0.241712	2.25922	0.137684	0.480386	0.597828	-0.0972622	0.404871	0.0445238	0.0608049	0.0985424	0.161917	0.0321158
167	CRISP1	0.248888	0.0796471	3.12488	0.00177875	0.163053	0	3.08363	0.543929	-0.344126	0.421598	1.44041	2.42845	2.14015	-0.0830138	0.109402	0.230489	0.3727	0.322302	0.0581925	0.0673372	0.0256051	0.0235539	0.0226797
404672	GTF2H5	-0.338731	0.108452	-3.12333	0.0017882	0.163053	18.4725	4.90632	0.297045	-1.57366	0.0891513	-1.50487	-1.58048	-3.14212	-0.335886	0.0234255	-0.243377	-0.454566	-0.681467	0.0455576	0.0690436	0.0261553	0.0827206	0.0470373
86	ACTL6A	-0.281542	0.0902218	-3.12055	0.00180513	0.163053	0	1.40599	0.843153	-1.00552	-0.592355	-1.54246	-1.16581	-2.45837	-0.203944	-0.159906	-0.234456	-0.315306	-0.465696	0.041138	0.0728726	0.0231043	0.0731494	0.0358849
90135	BTBD6	-0.300767	0.0963425	-3.12185	0.0017972	0.163053	8.70671	4.38148	0.356833	-0.331177	-3.10819	-1.64058	-1.3978	-0.831349	-0.0644462	-0.587469	-0.33003	-0.381586	-0.162757	0.037868	0.0357236	0.040468	0.0745243	0.0383279
10857	PGRMC1	-0.32182	0.104091	-3.0917	0.00199012	0.174495	4.44238	4.18596	0.381424	-1.41934	-1.25532	-2.95719	-1.4258	0.361507	-0.319513	-0.332782	-0.478022	-0.508342	0.0852949	0.0506765	0.0702773	0.0261299	0.127114	0.055669
64098	PARVG	0.442957	0.143436	3.08819	0.00201377	0.174495	49.0778	7.85512	0.097032	0.831018	3.63359	2.18568	-0.48195	3.44996	0.18136	0.807103	0.498391	-0.171612	0.597638	0.0476278	0.0493384	0.0519958	0.126791	0.0300088
6361	CCL17	0.29325	0.0948094	3.09305	0.00198114	0.174495	2.70095	4.11104	0.391187	0.123596	0.931544	0.757741	1.7	3.10988	0.0291046	0.208943	0.182441	0.299438	0.596368	0.0554512	0.0503095	0.05797	0.0310253	0.036774
220382	FAM181B	0.278167	0.0899297	3.09316	0.00198035	0.174495	0	3.71774	0.445551	0.49985	2.1745	0.498483	1.04797	2.63825	0.100962	0.449605	0.148469	0.166271	0.530316	0.040798	0.0427506	0.0887094	0.0251729	0.0404053
65125	WNK1	-0.314784	0.101785	-3.09264	0.00198383	0.174495	0	3.25642	0.515867	0.0771473	0.0940496	-2.95099	-1.08147	-1.71118	0.0197278	0.0368395	-0.409701	-0.438906	-0.417958	0.0653909	0.153431	0.0192752	0.164708	0.059659
91	ACVR1B	-0.292303	0.094611	-3.08952	0.00200478	0.174495	6.93104	4.29789	0.36719	-1.72854	-1.79423	0.592034	-1.19227	-2.60304	-0.310936	-0.367061	0.14885	-0.260993	-0.48282	0.0323578	0.0418525	0.0632129	0.0479191	0.034404
2128	EVX1	0.288494	0.0933697	3.0898	0.00200291	0.174495	0	3.4965	0.478411	1.49227	-0.476524	1.06529	1.91533	2.40543	0.355581	-0.116113	0.265157	0.343977	0.418061	0.0567784	0.0593739	0.0619535	0.0322531	0.0302061
171558	PTCRA	-0.382888	0.124152	-3.08401	0.00204229	0.175944	16.6986	4.80184	0.308241	-1.22514	-0.405962	0.0205708	-1.44054	-3.76153	-0.336416	-0.120119	0.00833197	-0.30562	-0.704098	0.0754012	0.0875495	0.164057	0.0450107	0.0350379
10452	TOMM40	-0.290162	0.0943261	-3.07616	0.00209684	0.177563	0	0.417611	0.98101	-1.69723	-1.58554	-0.986658	-0.696591	-1.73986	-0.328394	-0.312483	-0.203914	-0.200215	-0.35209	0.0374377	0.0388416	0.042713	0.0826106	0.0409524
6230	RPS25	-0.274153	0.0891462	-3.07532	0.00210276	0.177563	0	2.65245	0.617561	-0.896091	-0.562936	-1.94506	-0.802732	-2.56174	-0.161175	-0.129079	-0.27174	-0.353344	-0.580018	0.0323511	0.0525769	0.0195182	0.193755	0.0512639
11131	CAPN11	0.303852	0.0987364	3.0774	0.00208814	0.177563	0	1.37565	0.848417	1.70409	1.04776	0.686188	2.17384	1.28371	0.506309	0.344758	0.135795	0.370735	0.273092	0.088277	0.108269	0.0391634	0.0290853	0.0452571
6117	RPA1	-0.33237	0.108165	-3.07279	0.00212065	0.177563	0	2.37748	0.666701	-1.09982	-1.47582	-0.519568	-1.31864	-2.53439	-0.240559	-0.381904	-0.114253	-0.455891	-0.558533	0.0478408	0.0669642	0.0483562	0.119528	0.048568
4678	NASP	-0.348111	0.113252	-3.07378	0.00211365	0.177563	40.726	6.74832	0.149801	-1.63733	-1.20785	-4.71443	-1.13533	-0.213389	-0.291926	-0.244479	-0.660082	-0.282245	-0.0508854	0.0317888	0.0409696	0.0196037	0.0618027	0.0568646
54433	GAR1	-0.293151	0.0958127	-3.05963	0.0022161	0.182936	0	2.95208	0.565877	-1.73199	0.325202	-2.77493	-0.751229	-0.971217	-0.369921	0.102325	-0.445399	-0.187341	-0.206998	0.0456169	0.099005	0.0257629	0.0621903	0.0454253
55030	FBXO34	-0.335651	0.109789	-3.05723	0.00223392	0.182936	0	3.62499	0.45913	0.195443	-1.97527	-1.8789	-1.13407	-2.05313	0.0462249	-0.491506	-0.387908	-0.352657	-0.527794	0.0559388	0.061916	0.0426236	0.0966989	0.0660839
23515	MORC3	-0.320634	0.10481	-3.05919	0.00221938	0.182936	7.08463	4.30499	0.3663	0.025235	-0.605618	-1.44795	-0.649093	-3.48964	0.00830977	-0.270271	-0.254751	-0.145935	-0.591481	0.108435	0.19916	0.0309543	0.0505482	0.028729
122416	ANKRD9	-0.391099	0.127863	-3.05873	0.00222275	0.182936	3.79881	4.15795	0.385051	0.425105	-0.792801	-2.15351	-1.29041	-2.63959	0.135035	-0.276023	-0.452763	-0.469178	-0.663309	0.100902	0.121217	0.0442025	0.132197	0.0631478
23314	SATB2	0.276377	0.0904753	3.05472	0.0022527	0.183466	0	3.41649	0.49069	1.45804	2.66715	-0.209388	0.96412	1.59212	0.304434	0.56172	-0.070544	0.159419	0.284603	0.0435963	0.0443552	0.113505	0.0273413	0.031954
6001	RGS10	-0.40119	0.131456	-3.05191	0.00227394	0.18376	30.9484	5.79277	0.215168	-2.50389	-1.2453	-0.113401	-0.521166	-3.59191	-0.516122	-0.296637	-0.0286078	-0.193088	-0.753229	0.0424886	0.056742	0.0636402	0.137265	0.0439748
219402	MTIF3	-0.297698	0.0975745	-3.05098	0.00228098	0.18376	0	2.38607	0.665146	-0.663617	-1.07495	-3.03256	-0.859851	-0.403521	-0.15177	-0.330778	-0.458786	-0.240442	-0.0928854	0.0523043	0.094688	0.0228876	0.078194	0.0529862
219990	OOSP2	0.270884	0.088948	3.04542	0.00232358	0.186186	0	1.33716	0.85504	0.750936	1.66948	0.992803	2.37357	0.800733	0.153405	0.399069	0.246112	0.363922	0.156678	0.0417322	0.0571391	0.0614523	0.0235078	0.038286
7337	UBE3A	-0.265313	0.0872677	-3.04022	0.00236402	0.186751	0	0.723548	0.948394	-0.915132	-1.46023	-1.72845	-1.26002	-1.55615	-0.150439	-0.296925	-0.294199	-0.355851	-0.324022	0.0270242	0.0413477	0.0289714	0.0797599	0.0433556
56475	RPRM	0.28123	0.0925194	3.03969	0.00236822	0.186751	0	3.4122	0.491354	1.66263	0.988272	1.95431	2.25441	0.0960288	0.37816	0.230707	0.537631	0.371256	0.0178145	0.0517324	0.0544966	0.0756805	0.0271195	0.0344148
2734	GLG1	-0.278448	0.091528	-3.04222	0.00234844	0.186751	0	0.761798	0.943495	-1.31294	-2.10736	-1.40323	-0.532096	-1.26487	-0.236181	-0.436912	-0.233809	-0.196475	-0.270606	0.0323592	0.0429843	0.0277629	0.136344	0.0457704
84539	MCHR2	0.275737	0.0907602	3.03808	0.00238089	0.186762	0	1.98736	0.738084	0.607579	0.703664	1.94192	0.933028	2.38986	0.138249	0.175558	0.41645	0.166447	0.41696	0.0517752	0.0622455	0.0459901	0.0318246	0.03044
10369	CACNG2	0.265728	0.0875927	3.03367	0.00241596	0.187625	0	2.74049	0.602148	1.96406	1.57203	1.84585	0.732133	1.29294	0.425522	0.388117	0.536982	0.114662	0.20433	0.0469391	0.0609546	0.0846306	0.0245278	0.024975
8531	YBX3	0.37602	0.123954	3.03353	0.00241708	0.187625	13.5633	4.62767	0.327677	0.828307	1.20149	2.42504	-0.707051	2.75093	0.196403	0.325993	0.600197	-0.313527	0.555032	0.0562228	0.0736172	0.0612562	0.19663	0.0407078
27179	IL36A	0.290123	0.0957941	3.02861	0.00245679	0.188399	0	2.4341	0.656474	0.697177	0.607523	0.445832	3.01322	1.21376	0.153253	0.14175	0.139445	0.478055	0.271683	0.0483203	0.0544403	0.0978281	0.0251706	0.0501028
124599	CD300LB	0.423639	0.139805	3.03021	0.00244384	0.188399	38.1995	6.47244	0.166535	0.813276	3.34193	1.43879	0.180804	2.81005	0.184094	0.795561	0.395208	0.0482757	0.644438	0.0512393	0.05667	0.0754499	0.0712918	0.052594
55026	TMEM255A	0.273357	0.0902879	3.02761	0.00246496	0.188399	8.20814	4.35769	0.359757	0.951166	3.17796	-0.433746	1.23328	1.38737	0.181715	0.561403	-0.175922	0.198181	0.24626	0.0364979	0.031207	0.164502	0.0258226	0.0315066
339	APOBEC1	0.263091	0.0869593	3.02545	0.00248266	0.188783	0	3.37194	0.497616	0.537305	-0.236128	2.55118	1.49091	1.85727	0.111836	-0.0614928	0.431556	0.253697	0.371969	0.043323	0.0678195	0.0286148	0.0289551	0.0401108
9215	LARGE1	0.27323	0.090715	3.01196	0.00259564	0.189	11.9188	4.54126	0.337683	2.95678	0.942238	1.57988	1.70781	-0.248772	0.513903	0.181729	0.343868	0.283238	-0.0537447	0.0302083	0.0371985	0.0473735	0.0275059	0.0466732
9051	PSTPIP1	0.330702	0.109813	3.0115	0.00259964	0.189	0	3.48612	0.479992	1.0198	0.908504	2.49888	-0.156823	2.10258	0.245313	0.250111	0.632385	-0.0458898	0.419204	0.0578646	0.0757902	0.064043	0.0856275	0.0397506
10946	SF3A3	-0.28822	0.0955859	-3.0153	0.00256722	0.189	0	1.60268	0.808311	-1.85893	-1.08264	-0.834321	-0.850435	-2.15585	-0.417784	-0.240379	-0.142866	-0.269084	-0.428832	0.0505099	0.0492977	0.0293218	0.100114	0.0395675
128077	LIX1L	-0.273198	0.090679	-3.0128	0.0025885	0.189	0	3.99263	0.407004	-1.96625	-2.46897	-0.0895953	-1.03856	-1.42163	-0.358125	-0.579849	-0.0164571	-0.21466	-0.315579	0.0331737	0.0551568	0.0337392	0.0427212	0.0492767
585	BBS4	-0.312869	0.103713	-3.01667	0.0025557	0.189	19.1802	4.94928	0.292541	-1.47174	-1.57185	-2.92596	0.181164	-1.75897	-0.340766	-0.422017	-0.560797	0.035909	-0.312893	0.0536104	0.0720834	0.0367344	0.0392881	0.0316426
1387	CREBBP	-0.323803	0.107227	-3.0198	0.00252945	0.189	0	2.74589	0.601208	-1.3678	-2.28314	-1.97413	-0.773171	-0.535214	-0.34911	-0.632453	-0.406328	-0.272739	-0.103095	0.0651445	0.0767346	0.0423643	0.124436	0.0371037
84628	NTNG2	0.331734	0.109852	3.01984	0.00252911	0.189	0	2.30615	0.67965	0.294969	0.831309	1.90091	1.09394	2.41605	0.0857171	0.301084	0.481326	0.20975	0.532254	0.0844466	0.131175	0.0641144	0.0367638	0.0485316
54910	SEMA4C	-0.27027	0.0897301	-3.01203	0.00259509	0.189	0	1.58095	0.812212	-1.63738	-1.7475	-1.09163	-0.948514	-1.68142	-0.369766	-0.508812	-0.185703	-0.165174	-0.334517	0.0509984	0.0847779	0.0289391	0.0303247	0.0395809
4736	RPL10A	-0.300785	0.0995657	-3.02097	0.00251968	0.189	13.6548	4.63257	0.327116	-2.40263	-1.87728	-2.32008	-0.752012	0.072404	-0.473684	-0.376764	-0.428325	-0.289851	0.0125997	0.0388691	0.040279	0.0340832	0.14856	0.0302829
2186	BPTF	-0.307359	0.102367	-3.00253	0.00267748	0.193715	29.0705	5.6394	0.227745	-1.0653	-2.38038	-1.44142	-0.111031	-3.08782	-0.230909	-0.567209	-0.293241	-0.0185822	-0.492237	0.0469825	0.0567799	0.0413873	0.0280093	0.0254122
4528	MTIF2	-0.271071	0.0903705	-2.99956	0.00270373	0.194668	0	2.82069	0.588266	-1.27847	-2.85339	-0.93878	-0.599258	-0.895163	-0.222705	-0.554134	-0.207933	-0.132403	-0.190381	0.0303445	0.0377144	0.0490591	0.0488169	0.0452316
144715	RAD9B	0.281224	0.0940063	2.99154	0.00277576	0.197993	0	3.55043	0.470251	0.472306	2.63486	1.18769	1.08632	1.65634	0.0988718	0.634796	0.428992	0.175185	0.318803	0.0438227	0.0580433	0.130464	0.0260063	0.0370463
91746	YTHDC1	-0.34929	0.117101	-2.98281	0.00285618	0.197993	14.762	4.69274	0.320301	-1.08208	-2.58126	-2.48786	-0.834858	-0.451855	-0.248793	-0.58471	-0.697537	-0.271415	-0.0875379	0.0528638	0.0513119	0.078611	0.105692	0.0375314
1121	CHM	-0.289139	0.0968939	-2.98408	0.00284435	0.197993	0	1.33166	0.855981	-0.7718	-0.795584	-2.61835	-1.07555	-0.997577	-0.192705	-0.227235	-0.452413	-0.241365	-0.200065	0.0623415	0.0815788	0.0298547	0.0503599	0.0402208
389336	C5orf46	0.290174	0.0971761	2.98606	0.00282597	0.197993	7.67829	4.33268	0.362851	1.20402	0.834162	-1.1073	2.04537	2.65477	0.245895	0.194523	-0.463997	0.385543	0.413344	0.0417089	0.0543802	0.17559	0.0355305	0.0242421
171023	ASXL1	-0.412058	0.137994	-2.98605	0.00282608	0.197993	51.5826	8.2615	0.0824555	-1.47502	-0.587636	-1.85283	-1.14487	-4.56702	-0.289394	-0.128759	-0.400408	-0.292791	-0.888462	0.038493	0.0480105	0.0467018	0.0654034	0.0378453
23178	PASK	-0.372251	0.124741	-2.98418	0.00284343	0.197993	0	1.94555	0.745774	-2.48867	-0.884049	-0.378121	-1.26581	-1.45966	-0.670645	-0.311785	-0.122319	-0.389591	-0.308803	0.0726191	0.124382	0.104647	0.0947294	0.0447568
539	ATP5PO	-0.280262	0.0938524	-2.9862	0.00282468	0.197993	0	3.43469	0.487878	-2.20186	-1.04517	-2.45912	-0.574965	0.183442	-0.390974	-0.239182	-0.425637	-0.218677	0.0387368	0.0315295	0.0523703	0.0299584	0.144652	0.0445916
11097	NUPL2	-0.252396	0.0844213	-2.98972	0.00279237	0.197993	0	1.82659	0.767615	-0.5676	-0.103794	-2.15401	-1.16284	-2.10715	-0.11101	-0.0269298	-0.327719	-0.276971	-0.339659	0.0382507	0.0673164	0.0231476	0.0567325	0.0259834
3998	LMAN1	-0.316254	0.106218	-2.97739	0.00290711	0.200591	11.8674	4.53861	0.337993	0.042071	-2.30713	-2.61689	-0.960826	-1.28666	0.0118869	-0.690415	-0.487593	-0.164726	-0.313823	0.0798313	0.0895525	0.0347173	0.0293923	0.0594901
22898	DENND3	0.298568	0.100433	2.9728	0.00295098	0.201453	1.56873	4.06375	0.397447	2.51674	0.309622	1.52201	-0.588128	2.00743	0.475979	0.0829054	0.299147	-0.193498	0.410164	0.0357683	0.0716973	0.038631	0.108245	0.041748
219541	MED19	-0.30081	0.101191	-2.97271	0.0029518	0.201453	12.9212	4.59354	0.3316	-2.29876	0.266345	-2.80397	-0.543774	-1.31836	-0.47804	0.0666402	-0.489923	-0.129193	-0.270915	0.0432455	0.0626014	0.0305287	0.0564467	0.0422279
80018	NAA25	-0.271194	0.0912545	-2.97185	0.00296016	0.201453	0	1.02742	0.90561	-0.757934	-0.778583	-2.47433	-0.922412	-1.30594	-0.193345	-0.211552	-0.39277	-0.1703	-0.277482	0.0650734	0.0738284	0.0251977	0.0340863	0.0451464
7980	TFPI2	-0.313979	0.105928	-2.96407	0.00303599	0.205675	0	0.426651	0.980237	-2.10415	-1.26949	-0.797198	-1.39597	-0.767496	-0.37779	-0.289709	-0.233385	-0.379354	-0.207442	0.0322364	0.0520796	0.0857066	0.0738472	0.0730532
199713	NLRP7	0.280516	0.0947487	2.96064	0.00307005	0.206131	0	2.11208	0.715154	0.791315	0.905271	-0.0266281	1.87103	2.43522	0.14829	0.202186	-0.0143285	0.312329	0.502045	0.0351176	0.0498823	0.289549	0.0278652	0.0425021
9774	BCLAF1	-0.278471	0.0940589	-2.9606	0.00307039	0.206131	0	3.21292	0.522846	0.0965794	-1.33384	-2.52068	-1.07781	-1.63528	0.0198972	-0.323548	-0.469627	-0.328309	-0.285145	0.0424436	0.0588401	0.0347114	0.0927847	0.0304052
10982	MAPRE2	-0.293706	0.0994583	-2.95306	0.00314646	0.206976	0	1.48507	0.829283	-2.30598	-0.533834	-0.851819	-1.28273	-1.49402	-0.430108	-0.127108	-0.183138	-0.448132	-0.299515	0.0347892	0.0566938	0.0462233	0.122051	0.0401903
5204	PFDN5	-0.281664	0.0953993	-2.95247	0.00315242	0.206976	0	3.3022	0.508583	-0.431351	-0.441345	-1.88594	-0.562514	-2.78662	-0.0875665	-0.113217	-0.303149	-0.21523	-0.558636	0.0412111	0.0658059	0.0258378	0.1464	0.0401887
83990	BRIP1	0.294215	0.0995627	2.95508	0.00312593	0.206976	0	3.17363	0.529201	1.02761	1.11873	0.81405	2.98051	-0.228967	0.284029	0.28219	0.257877	0.446076	-0.0547889	0.0763959	0.0636259	0.100351	0.0223994	0.0572584
10586	MAB21L2	0.404012	0.136804	2.95323	0.00314469	0.206976	42.2541	6.92689	0.139802	1.59166	3.80365	1.25141	2.00349	0.253194	0.349694	0.859719	0.604747	0.320529	0.0569955	0.0482701	0.0510871	0.233532	0.0255953	0.0506728
55728	N4BP2	-0.329229	0.111453	-2.95398	0.00313705	0.206976	0	2.72079	0.605581	-0.258186	-0.328321	-2.20316	-0.46621	-2.49019	-0.0702412	-0.105064	-0.401968	-0.178387	-0.551915	0.0740149	0.102403	0.0332882	0.146408	0.0491222
163175	LGI4	-0.307268	0.104234	-2.94785	0.00319988	0.208258	15.1009	4.71147	0.318203	-0.274869	-1.18997	-2.73302	-0.651869	-2.36378	-0.065136	-0.30613	-0.652357	-0.11838	-0.437621	0.0561551	0.0661826	0.056975	0.0329787	0.0342754
29937	NENF	-0.285253	0.0967581	-2.94811	0.00319726	0.208258	4.42674	4.18527	0.381512	-0.698497	-0.352916	-3.2954	-1.46765	-0.171397	-0.174923	-0.0835424	-0.498896	-0.3634	-0.0389328	0.0627143	0.0560367	0.0229195	0.0613091	0.051597
55794	DDX28	-0.323313	0.109795	-2.94469	0.00323279	0.208777	34.5587	6.11235	0.190914	-0.389558	-1.47113	-3.90717	-0.859967	-1.45308	-0.071761	-0.334042	-0.652849	-0.191581	-0.295536	0.0339338	0.0515582	0.027919	0.0496295	0.0413656
84437	MSANTD4	-0.264649	0.0898822	-2.94439	0.00323588	0.208777	0	3.70582	0.44728	-0.68058	-0.0642981	-3.07392	-0.541771	-1.47155	-0.140199	-0.017892	-0.485579	-0.111023	-0.304114	0.0424355	0.0774323	0.0249537	0.0419947	0.0427093
84077	C3orf20	0.272461	0.092745	2.93774	0.00330613	0.21239	0	2.23685	0.692288	1.38299	0.441573	1.11779	2.59046	0.894202	0.333898	0.108858	0.414903	0.432168	0.142351	0.0582896	0.0607741	0.137775	0.0278325	0.0253426
1355	COX15	0.26948	0.0918135	2.93508	0.00333459	0.21265	0	3.60406	0.462233	1.43075	0.776809	1.22395	0.097714	2.83913	0.302328	0.164258	0.240842	0.0215036	0.542473	0.0446509	0.0447123	0.0387199	0.0484292	0.0365077
27177	IL36B	0.326132	0.11113	2.9347	0.00333871	0.21265	42.6074	6.96954	0.137507	3.9799	2.45777	-0.289896	1.14137	1.08211	0.655486	0.400387	-0.109196	0.169911	0.21116	0.0271259	0.0265385	0.141883	0.0221609	0.0380785
30834	ZNRD1	-0.248239	0.0846963	-2.93093	0.00337954	0.212859	0	1.84668	0.763931	-2.04942	-0.443544	-1.33959	-0.605415	-1.96955	-0.394482	-0.0930983	-0.196395	-0.152027	-0.376737	0.0370505	0.0440565	0.0214941	0.0630573	0.0365881
2878	GPX3	0.345721	0.117949	2.93111	0.00337754	0.212859	0	1.30708	0.860173	1.56924	0.407485	0.807056	0.788533	2.44883	0.464416	0.166931	0.328844	0.175626	0.460141	0.0875857	0.167822	0.166024	0.0496064	0.0353072
11279	KLF8	0.285278	0.0973498	2.93044	0.00338483	0.212859	0	3.0132	0.555619	0.0889238	0.975411	1.66937	1.12039	2.5689	0.0235	0.27729	0.33136	0.193075	0.577726	0.0698392	0.080815	0.0393998	0.029697	0.0505764
196477	CCER1	0.265815	0.0908063	2.92727	0.00341952	0.213241	0	3.85781	0.425591	1.8862	1.30543	0.0415672	0.214275	2.6678	0.433018	0.321097	0.0130532	0.0370928	0.410382	0.0527028	0.0605018	0.0986129	0.0299665	0.023663
5136	PDE1A	0.252365	0.0861777	2.92842	0.00340688	0.213241	0	2.67179	0.61416	1.54781	0.345383	0.552773	2.81624	0.70404	0.294836	0.0668766	0.170531	0.424046	0.138595	0.0362848	0.0374927	0.0951728	0.0226718	0.0387527
26189	OR1A2	0.275214	0.0941526	2.92306	0.00346611	0.215245	0	2.55544	0.634737	1.47805	1.01649	1.12428	2.55989	-0.25447	0.287908	0.247202	0.308209	0.40449	-0.0632546	0.0379427	0.0591423	0.0751519	0.0249673	0.0617889
5695	PSMB7	-0.293912	0.100697	-2.91879	0.00351395	0.217311	0	3.87738	0.422855	-1.50193	-2.97332	-0.490686	-0.950902	-0.394025	-0.332282	-0.585013	-0.139214	-0.276906	-0.0742751	0.0489455	0.0387121	0.0804926	0.0847994	0.0355335
9961	MVP	0.362997	0.124448	2.91684	0.00353592	0.217766	35.1497	6.16805	0.186945	1.06981	0.618338	2.95474	-0.0584103	3.2718	0.21626	0.140857	0.587984	-0.0195271	0.655302	0.0408636	0.0518923	0.0395998	0.111763	0.0401152
272	AMPD3	0.259918	0.0891503	2.9155	0.00355119	0.217807	0	1.79747	0.772944	1.12382	2.21401	0.848281	0.766252	1.6811	0.209753	0.405224	0.254673	0.122798	0.404969	0.0348356	0.033499	0.0901333	0.0256827	0.0580306
222194	RSBN1L	-0.275028	0.0943764	-2.91416	0.0035665	0.217849	0	1.56388	0.815268	-0.11197	-0.663441	-2.26732	-1.30191	-1.66366	-0.0262649	-0.197727	-0.356426	-0.324043	-0.324825	0.0550233	0.0888234	0.0247122	0.0619498	0.0381212
10052	GJC1	-0.281713	0.0969732	-2.90506	0.00367186	0.221566	0	2.50438	0.643851	-0.411324	-0.736321	-2.61975	-0.427212	-1.78516	-0.083284	-0.168087	-0.474971	-0.18239	-0.34451	0.0409973	0.0521113	0.0328712	0.182271	0.0372435
8345	HIST1H2BH	0.321036	0.110516	2.90488	0.00367398	0.221566	14.9164	4.70126	0.319345	1.28334	-0.605709	3.17864	1.82112	0.58472	0.345283	-0.213721	0.580798	0.308083	0.156236	0.0723874	0.124499	0.0333862	0.0286194	0.0713949
4791	NFKB2	0.362207	0.124707	2.90447	0.00367877	0.221566	28.5904	5.60149	0.230952	0.943166	2.75634	1.7104	-0.400104	2.60011	0.227562	0.640508	0.494643	-0.10292	0.475359	0.0582137	0.0539985	0.0836356	0.0661693	0.0334242
347853	TBX10	0.278492	0.0959067	2.90378	0.00368682	0.221566	0	0.563978	0.966981	1.54796	1.40259	0.72773	1.75857	1.00515	0.359992	0.376229	0.187826	0.296238	0.196831	0.0540837	0.0719522	0.066615	0.0283766	0.0383461
51611	DPH5	-0.288495	0.0995211	-2.89883	0.00374558	0.224193	11.6323	4.52654	0.339412	-2.96184	-0.943086	-1.71168	-1.29532	0.360284	-0.559037	-0.199387	-0.293101	-0.32986	0.090702	0.0356254	0.0446982	0.0293219	0.0648494	0.0633789
9475	ROCK2	-0.359449	0.124074	-2.89706	0.00376679	0.224561	33.7897	6.04135	0.196081	-1.50435	-0.417334	-4.22586	-0.399987	-1.18524	-0.302	-0.0946286	-0.705537	-0.164221	-0.269816	0.040301	0.0514135	0.0278747	0.168566	0.0518228
54556	ING3	-0.262153	0.0905405	-2.89543	0.00378645	0.224834	0	2.92996	0.569613	-1.36118	-0.251359	-1.16317	-0.810461	-2.71802	-0.25133	-0.0618667	-0.218362	-0.168509	-0.547555	0.0340926	0.0605792	0.0352424	0.0432295	0.0405834
55763	EXOC1	-0.251926	0.0870613	-2.89367	0.00380772	0.225199	0	1.8728	0.759139	-1.64147	-1.77683	-0.497472	-0.832382	-1.85856	-0.336985	-0.355487	-0.0834933	-0.180422	-0.361471	0.042146	0.0400272	0.0281686	0.0469822	0.0378264
55781	RIOK2	-0.261472	0.0909382	-2.87528	0.00403675	0.228337	0	3.04628	0.550111	-1.17642	-0.538344	-2.44	-1.90935	0.201257	-0.254651	-0.141087	-0.363795	-0.421336	0.0455751	0.0468558	0.0686841	0.0222298	0.0486951	0.0512807
29789	OLA1	0.227061	0.0787463	2.88344	0.00393354	0.228337	12.0531	4.5482	0.336871	0.561004	2.80351	0.677061	1.22164	1.91451	0.0850746	0.524185	0.106156	0.187033	0.356876	0.0229968	0.0349595	0.0245829	0.0234395	0.0347472
1307	COL16A1	0.256907	0.0893039	2.87677	0.00401762	0.228337	2.01073	4.08208	0.395012	0.598348	1.6144	-0.0552561	2.7298	1.46226	0.135017	0.389726	-0.0106287	0.472582	0.262783	0.0509177	0.0582769	0.0370001	0.0299704	0.032296
26019	UPF2	-0.348917	0.120944	-2.88494	0.00391491	0.228337	34.2076	6.07973	0.193272	-2.66826	-0.126873	-0.972442	-0.910717	-3.24291	-0.484156	-0.0285061	-0.195626	-0.265021	-0.724916	0.0329243	0.0504825	0.0404692	0.0846824	0.0499695
133619	PRRC1	-0.287299	0.0996507	-2.88306	0.00393833	0.228337	0	2.57159	0.631864	-0.0703935	-0.971947	-2.4357	-1.68514	-1.0778	-0.0173586	-0.314903	-0.44793	-0.440484	-0.195073	0.0608086	0.104971	0.03382	0.0683262	0.0327582
64005	MYO1G	0.341534	0.118801	2.87483	0.0040424	0.228337	10.2647	4.45756	0.34761	0.960992	1.69373	0.545477	-0.40024	3.1826	0.235743	0.401614	0.159464	-0.144301	0.616016	0.060178	0.0562248	0.0854619	0.129986	0.0374645
101	ADAM8	0.3549	0.123216	2.88032	0.00397274	0.228337	9.19245	4.40492	0.353971	0.836147	1.77991	2.60375	-0.335376	1.70766	0.190463	0.419089	0.855191	-0.134869	0.371858	0.0518869	0.055439	0.107876	0.161719	0.0474186
9516	LITAF	0.285096	0.0992988	2.87109	0.00409057	0.228337	0	3.40335	0.492725	0.665439	0.248882	2.19112	-0.140731	2.51415	0.138924	0.0590997	0.392825	-0.0706934	0.496285	0.043585	0.0563875	0.0321415	0.252335	0.0389654
51552	RAB14	0.332776	0.115622	2.87815	0.0040002	0.228337	36.6663	6.31576	0.176776	2.40997	0.503503	1.07625	0.441406	3.60183	0.528482	0.142131	0.223292	0.0785709	0.616754	0.048088	0.0796839	0.0430445	0.0316845	0.029321
57085	AGTRAP	0.315119	0.109294	2.88323	0.00393626	0.228337	0	2.39247	0.663988	1.33004	1.68662	1.94815	-0.298558	1.48571	0.331773	0.425283	0.484876	-0.092837	0.294611	0.062223	0.06358	0.0619466	0.0966907	0.0393215
1601	DAB2	-0.345633	0.120334	-2.87229	0.00407502	0.228337	0	1.73547	0.784265	-1.3651	-0.618507	-2.44259	-0.628896	-1.17376	-0.361572	-0.175316	-0.600913	-0.189299	-0.305109	0.070155	0.0803442	0.0605231	0.0906024	0.0675695
116729	PPP1R27	0.268865	0.0931088	2.88765	0.00388136	0.228337	0	3.26112	0.515116	2.59413	0.810653	0.00480165	1.9927	0.491984	0.542774	0.198506	0.00139435	0.305031	0.106615	0.0437777	0.0599621	0.0843256	0.0234315	0.0469612
6191	RPS4X	-0.42271	0.147207	-2.87154	0.00408473	0.228337	36.6273	6.31187	0.177037	-3.61267	-0.117645	-0.522468	-0.901488	-2.80043	-0.808287	-0.033561	-0.142702	-0.355284	-0.557798	0.0500582	0.0813814	0.0746002	0.155321	0.0396738
55170	PRMT6	-0.264161	0.0919178	-2.87389	0.00405453	0.228337	0	3.0029	0.557341	-1.74175	-0.368233	-2.38761	-1.54571	-0.0543044	-0.337534	-0.098146	-0.445376	-0.304937	-0.0112692	0.0375548	0.0710396	0.0347958	0.0389193	0.0430641
56271	BEX4	-0.318935	0.110993	-2.87348	0.00405975	0.228337	0	0.719659	0.948883	-1.2912	-1.27328	-0.442559	-1.73115	-1.57967	-0.302058	-0.373196	-0.120725	-0.394562	-0.366563	0.054726	0.0859065	0.0744141	0.0519468	0.0538475
203427	SLC25A43	-0.282526	0.0984729	-2.86907	0.00411674	0.22894	0	1.68785	0.792924	-1.16395	-0.377508	-1.58323	-0.698463	-2.32973	-0.279223	-0.112252	-0.486679	-0.13629	-0.379978	0.0575483	0.0884175	0.0944921	0.038075	0.0266014
79701	OGFOD3	0.275393	0.0960508	2.86716	0.00414167	0.22947	19.0084	4.93878	0.293636	0.839909	2.7337	2.41223	0.826704	0.444553	0.167802	0.554509	0.49493	0.145168	0.0829998	0.0399145	0.0411448	0.0420967	0.0308348	0.0348583
4893	NRAS	-0.28178	0.0985279	-2.8599	0.00423769	0.23135	6.30887	4.26935	0.370779	-1.12	0.0607034	-1.77219	-1.11781	-2.71066	-0.21399	0.0130241	-0.348034	-0.282814	-0.61241	0.0365049	0.0460328	0.0385676	0.0640124	0.0510427
6496	SIX3	0.296649	0.103688	2.86098	0.00422331	0.23135	0	1.79383	0.773611	0.570905	2.03635	0.108236	1.99443	1.23163	0.142016	0.574853	0.0426555	0.318349	0.285453	0.0618792	0.0796908	0.155314	0.0254782	0.0537167
84946	LTV1	-0.308368	0.107823	-2.85994	0.00423723	0.23135	16.2223	4.77454	0.311223	0.0795104	-1.08063	-3.2298	-1.5371	-1.06738	0.0160385	-0.275489	-0.551733	-0.397694	-0.268137	0.0406891	0.0649907	0.0291814	0.0669415	0.0631071
7594	ZNF43	0.261304	0.0913285	2.86114	0.00422119	0.23135	0	3.35372	0.500465	1.64891	1.94552	-0.576355	2.10066	0.539377	0.323023	0.411034	-0.157252	0.322357	0.136863	0.0383772	0.0446359	0.0744412	0.0235485	0.0643852
57047	PLSCR2	0.265466	0.0929102	2.85723	0.00427354	0.232455	0	2.01543	0.732921	0.0775117	1.94692	1.19103	1.45533	1.68706	0.0212228	0.564919	0.349056	0.225004	0.276793	0.0749671	0.0841932	0.0858902	0.0239033	0.0269184
52	ACP1	-0.318638	0.111585	-2.85556	0.00429606	0.232831	0	3.51795	0.475154	-0.391011	0.0432303	-1.65664	-1.01169	-2.78378	-0.0944293	0.0147007	-0.323691	-0.408731	-0.590831	0.0583223	0.115638	0.0381773	0.163223	0.0450459
56945	MRPS22	-0.383509	0.134485	-2.85169	0.00434872	0.233983	62.4481	10.6519	0.0307676	-1.49621	-0.570112	-2.34515	-1.11032	-5.01397	-0.233864	-0.115826	-0.33106	-0.333987	-0.868185	0.0244308	0.0412757	0.0199284	0.0904811	0.0299821
3460	IFNGR2	0.284904	0.0998674	2.85283	0.00433323	0.233983	3.92937	4.1636	0.384317	0.870723	0.398298	2.23516	-0.260793	2.6029	0.153398	0.0924666	0.479249	-0.111514	0.497663	0.0310368	0.0538956	0.0459731	0.182838	0.0365558
3673	ITGA2	-0.295289	0.103703	-2.84744	0.00440718	0.234968	0	2.56661	0.632749	-2.15478	-0.867524	0.0775959	-0.634846	-2.20677	-0.515618	-0.244418	0.0289711	-0.130358	-0.389907	0.05726	0.0793787	0.139397	0.0421637	0.0312181
5037	PEBP1	-0.290343	0.101985	-2.84693	0.00441433	0.234968	0	3.31387	0.506738	-1.23749	-0.405802	-3.03298	-0.718437	-0.0878311	-0.291695	-0.135773	-0.49203	-0.218752	-0.0194314	0.055561	0.111943	0.0263175	0.0927104	0.0489456
4620	MYH2	0.344066	0.120835	2.8474	0.00440782	0.234968	38.9871	6.55599	0.161297	2.70845	0.172189	2.70455	1.24251	1.70894	0.491136	0.0356729	0.918895	0.199053	0.395524	0.0328822	0.042921	0.115436	0.0256645	0.0535663
96764	TGS1	-0.367176	0.129213	-2.84164	0.00448826	0.235063	51.6321	8.26994	0.0821755	-0.322608	0.207588	-4.04139	-2.72342	-2.29491	-0.0837047	0.0512791	-0.719834	-0.482807	-0.388891	0.0673208	0.0610204	0.0317251	0.031428	0.028716
11095	ADAMTS8	-0.313714	0.110329	-2.84343	0.00446304	0.235063	18.5108	4.90863	0.296802	-0.381273	0.372676	-2.11723	-2.7713	-1.8178	-0.0926656	0.100504	-0.543913	-0.465976	-0.383346	0.0590698	0.0727289	0.0659969	0.0282722	0.0444723
23484	LEPROTL1	-0.265791	0.0934801	-2.84329	0.00446509	0.235063	0	3.93605	0.414729	-0.598692	-1.83434	-2.63381	-1.16065	0.113969	-0.128999	-0.489583	-0.385915	-0.402479	0.0232817	0.0464263	0.0712345	0.021469	0.120249	0.0417305
9801	MRPL19	-0.34749	0.122256	-2.84232	0.00447863	0.235063	32.4551	5.92199	0.205051	-0.313869	-0.60365	-3.44963	-0.344958	-2.77451	-0.0950602	-0.210595	-0.629227	-0.0677565	-0.497065	0.0917277	0.12171	0.0332713	0.0385806	0.0320962
79596	RNF219	-0.276834	0.0974371	-2.84116	0.00449497	0.235063	0	3.86876	0.424059	-0.107497	-0.284107	-2.72088	-1.26249	-1.68867	-0.0228474	-0.0764306	-0.504245	-0.252864	-0.431277	0.0451731	0.0723721	0.0343451	0.0401158	0.0652261
10553	HTATIP2	0.358259	0.126251	2.83768	0.00454433	0.235187	31.6996	5.85648	0.210126	1.83877	1.79851	3.23996	-0.0914739	0.87113	0.343064	0.445306	0.825264	-0.0282093	0.177047	0.0348091	0.0613041	0.0648796	0.0951021	0.0413059
1153	CIRBP	-0.27173	0.0958317	-2.83549	0.00457552	0.235187	0	3.08075	0.544404	-2.35608	-0.0308592	-2.09684	-0.605253	-0.897572	-0.410265	-0.007783	-0.485858	-0.2254	-0.153143	0.0303214	0.0636098	0.0536894	0.138687	0.0291109
283629	TSSK4	0.262738	0.0926621	2.83544	0.00457623	0.235187	0	1.72277	0.786577	1.50108	0.439468	0.415525	1.58662	2.15083	0.28751	0.102016	0.113661	0.261249	0.476203	0.0366855	0.0538868	0.0748217	0.0271121	0.0490197
1448	CSN3	0.249429	0.0879	2.83764	0.00454487	0.235187	0	3.58487	0.465092	-0.499393	1.48609	0.967631	1.73717	2.28585	-0.110606	0.287457	0.321456	0.26402	0.417616	0.0490537	0.0374156	0.110363	0.0230987	0.0333778
6636	SNRPF	-0.360916	0.12723	-2.83671	0.00455808	0.235187	29.8679	5.70352	0.222411	-3.12078	0.322298	-1.30175	-0.943975	-2.37473	-0.692738	0.0942591	-0.234367	-0.313639	-0.521372	0.0492733	0.0855323	0.0324145	0.110392	0.0482022
80028	FBXL18	0.29073	0.102739	2.82979	0.00465781	0.236261	28.739	5.61317	0.22996	0.0459804	0.0332853	1.98088	3.39443	1.77682	0.00978816	0.00887627	0.288909	0.545324	0.41003	0.0453165	0.071114	0.0212719	0.0258093	0.0532529
11266	DUSP12	-0.246649	0.0871331	-2.83071	0.00464444	0.236261	0	3.3415	0.502385	-1.0015	-1.36041	-2.77049	-0.862138	0.286032	-0.192653	-0.265019	-0.410544	-0.25438	0.0619563	0.0370041	0.0379504	0.0219587	0.087059	0.0469184
9790	BMS1	-0.260362	0.0919918	-2.83027	0.00465088	0.236261	0	0.70116	0.951186	-1.96291	-0.733488	-1.46836	-1.14483	-0.924028	-0.390964	-0.153889	-0.242648	-0.257403	-0.24836	0.0396709	0.0440181	0.0273078	0.0505526	0.0722425
6894	TARBP1	-0.281733	0.0995663	-2.82961	0.00466053	0.236261	0	2.81744	0.588826	-2.66877	-0.721251	-1.37665	-1.06385	-0.393232	-0.576973	-0.184007	-0.290643	-0.227336	-0.0884168	0.0467399	0.0650875	0.044573	0.0456642	0.050556
9987	HNRNPDL	-0.275419	0.0974045	-2.82758	0.00469011	0.236954	0	2.92758	0.570016	-0.309372	-0.214439	-2.75329	-1.15169	-1.36898	-0.0669551	-0.063091	-0.49102	-0.306619	-0.263712	0.0468388	0.086562	0.0318049	0.0708807	0.0371082
6118	RPA2	-0.249407	0.0882429	-2.82637	0.00470793	0.237051	9.20104	4.40534	0.35392	-3.16063	-1.23649	-1.0705	-0.921829	0.00236903	-0.488693	-0.222659	-0.185543	-0.312663	0.000438925	0.0239071	0.0324264	0.0300408	0.115041	0.0343274
22891	ZNF365	0.207738	0.0736717	2.81978	0.00480567	0.241157	0	1.69988	0.79074	0.594384	2.1274	0.783247	0.905218	1.8273	0.0891027	0.339054	0.192279	0.14194	0.278298	0.0224723	0.0254002	0.060265	0.0245868	0.0231955
91319	DERL3	0.371178	0.133057	2.78961	0.00527711	0.241696	50.8271	8.13456	0.0867715	1.09517	1.59147	3.55346	0.789406	2.05909	0.201269	0.366059	1.09389	0.133612	0.395246	0.0337747	0.0529061	0.0947642	0.0286478	0.0368454
23394	ADNP	-0.315427	0.112817	-2.79591	0.00517534	0.241696	25.9429	5.40124	0.248548	0.01086	-1.81481	-3.2954	-1.24174	-0.920125	0.00270721	-0.537362	-0.591975	-0.289972	-0.158528	0.0621413	0.0876738	0.0322693	0.0545317	0.0296837
10574	CCT7	-0.224781	0.0802867	-2.79972	0.00511465	0.241696	0	1.97199	0.740911	-1.65803	-0.587993	-0.838043	-0.899975	-2.28109	-0.260066	-0.136768	-0.113175	-0.281295	-0.4101	0.0246026	0.0541037	0.0182376	0.0976931	0.0323219
4824	NKX3-1	0.327348	0.116693	2.80521	0.00502837	0.241696	0	1.06222	0.90022	0.104076	0.169135	1.72025	1.52451	1.89963	0.0495353	0.0818857	0.427121	0.279174	0.439115	0.226531	0.234395	0.0616479	0.0335346	0.0534338
9148	NEURL1	0.274477	0.0983925	2.78961	0.00527714	0.241696	0	3.56275	0.468402	0.575568	1.62443	2.39949	1.17611	1.11077	0.132111	0.463027	0.783782	0.200076	0.209624	0.0526845	0.0812471	0.106697	0.0289395	0.0356151
10363	HMG20A	-0.276487	0.0981942	-2.81572	0.00486687	0.241696	0	1.77894	0.776333	-2.03821	-0.30602	-1.74857	-0.700012	-1.38265	-0.509607	-0.0977042	-0.334711	-0.137311	-0.278633	0.0625134	0.101936	0.0366415	0.0384771	0.0406105
55576	STAB2	0.250474	0.0896523	2.79384	0.00520861	0.241696	0	2.25865	0.688307	0.173911	0.308525	0.321173	1.57958	2.70934	0.0450539	0.0787057	0.100871	0.263783	0.390435	0.0671136	0.0650774	0.0986414	0.0278876	0.0207668
8612	PLPP2	0.263283	0.0936047	2.81271	0.00491266	0.241696	16.9923	4.81883	0.306397	2.62592	-0.345807	0.649942	2.45268	1.22462	0.469498	-0.0692119	0.201949	0.384607	0.210494	0.0319671	0.0400585	0.0965464	0.0245896	0.0295444
10087	COL4A3BP	-0.269314	0.0957131	-2.81377	0.00489643	0.241696	0	1.51311	0.824316	-0.656029	-1.37196	-1.86144	-0.52479	-1.83777	-0.174375	-0.405392	-0.313262	-0.101361	-0.39693	0.0706514	0.0873104	0.0283216	0.0373054	0.0466492
5079	PAX5	0.262885	0.094324	2.78704	0.00531912	0.241696	0	2.94	0.567917	1.66186	0.497801	0.883393	0.91501	2.46585	0.334787	0.108137	0.254083	0.150996	0.58519	0.0405837	0.0471886	0.0827263	0.027232	0.0563197
7132	TNFRSF1A	0.284758	0.101959	2.79287	0.00522419	0.241696	0	3.64839	0.455676	0.659208	0.170074	2.68381	-0.182359	1.93622	0.147733	0.0423768	0.489051	-0.0741612	0.395112	0.0502241	0.062084	0.033205	0.165386	0.0416418
1395	CRHR2	0.335474	0.119883	2.79834	0.00513665	0.241696	45.9207	7.39655	0.116359	-0.265729	2.91578	0.791932	3.54469	1.52216	-0.053045	0.526466	0.208607	0.584069	0.300918	0.0398484	0.0326009	0.0693879	0.0271501	0.039082
23466	CBX6	-0.272406	0.0977065	-2.788	0.00530348	0.241696	0	2.6376	0.620177	0.369602	-1.44528	-2.0293	-0.971185	-1.76743	0.0905381	-0.351236	-0.346433	-0.294631	-0.346791	0.0600059	0.0590599	0.0291438	0.0920348	0.038499
79807	GSTCD	-0.419607	0.150551	-2.78714	0.00531753	0.241696	68.4586	12.6818	0.0129401	-1.67911	-2.02458	-0.60693	-1.3651	-5.65191	-0.297408	-0.392817	-0.123875	-0.28505	-0.93976	0.0313726	0.0376451	0.041657	0.0436026	0.0276467
3898	LAD1	-0.397192	0.141094	-2.81508	0.00487656	0.241696	57.8864	9.49813	0.0497857	-1.56554	-3.00349	-0.289763	-0.46675	-4.38216	-0.269596	-0.520644	-0.125582	-0.0850985	-0.821873	0.0296551	0.0300489	0.187832	0.033241	0.0351749
25893	TRIM58	-0.450689	0.160446	-2.80898	0.00496988	0.241696	0	2.58753	0.629034	-0.900927	-0.155797	0.0929532	-0.949014	-2.95511	-0.316484	-0.0696455	0.0581356	-0.431067	-0.69014	0.123403	0.199833	0.391162	0.206321	0.0545414
55250	ELP2	-0.241202	0.0857678	-2.81226	0.00491943	0.241696	0	0.386502	0.983567	-1.42211	-1.71606	-1.26323	-1.00283	-0.85243	-0.246385	-0.335764	-0.202437	-0.260156	-0.178887	0.0300168	0.0382826	0.0256812	0.067299	0.044039
1892	ECHS1	-0.250517	0.0893773	-2.80292	0.00506425	0.241696	0	3.83129	0.429319	-1.21774	0.0708689	-2.59571	-0.0627737	-1.8596	-0.218811	0.0156949	-0.45339	-0.0172852	-0.352334	0.0322872	0.0490465	0.0305094	0.075822	0.0358982
5048	PAFAH1B1	-0.243386	0.0867516	-2.80555	0.00502309	0.241696	3.58344	4.14866	0.38626	-1.26107	-2.89496	-0.949805	-0.744623	-0.916061	-0.263884	-0.642873	-0.131001	-0.229078	-0.158885	0.0437873	0.0493134	0.019023	0.0946443	0.0300827
11009	IL24	0.258196	0.0923872	2.79471	0.00519462	0.241696	0	2.19936	0.699147	0.246602	2.10382	1.28093	1.31572	1.46662	0.0528655	0.472766	0.278492	0.206654	0.393307	0.0459569	0.0504983	0.0472685	0.0246693	0.0719162
3948	LDHC	0.332914	0.118618	2.80661	0.00500659	0.241696	39.7716	6.64139	0.156097	0.464511	2.76383	2.63992	2.04681	0.386122	0.106121	0.686817	0.648942	0.307862	0.0716598	0.0521926	0.0617534	0.060427	0.0226234	0.034443
84937	ZNRF1	-0.469119	0.167675	-2.79779	0.00514535	0.241696	71.5788	14.074	0.00706265	-0.740701	-2.748	-4.52504	-0.202421	-3.45275	-0.162465	-0.649399	-0.862603	-0.034927	-0.656052	0.04811	0.0558458	0.0363393	0.0297723	0.0361033
54714	CNGB3	0.365773	0.130124	2.81095	0.00493953	0.241696	56.6529	9.22783	0.0556503	2.04655	2.06537	-0.0962885	0.943531	4.80954	0.416618	0.448439	-0.0239599	0.158676	0.697589	0.0414412	0.0471422	0.0619186	0.0282819	0.0210374
1116	CHI3L1	0.415126	0.148318	2.79889	0.00512785	0.241696	36.2618	6.27567	0.179485	0.850162	3.24944	2.1249	1.76323	0.0849651	0.213368	0.83807	0.855716	0.300598	0.028593	0.0629878	0.0665187	0.162174	0.0290641	0.11325
958	CD40	0.304765	0.108903	2.7985	0.00513401	0.241696	0	1.63388	0.802689	1.72475	0.594516	1.75678	0.946763	1.46788	0.468958	0.179414	0.479901	0.167967	0.383646	0.0739293	0.091072	0.0746224	0.0314749	0.0683098
23082	PPRC1	-0.272846	0.0974855	-2.79884	0.00512865	0.241696	0	2.97409	0.56217	-1.51091	0.230288	-2.26361	-0.857658	-1.61624	-0.296146	0.053232	-0.461488	-0.234412	-0.336755	0.0384182	0.0534322	0.0415641	0.0747015	0.0434125
79726	WDR59	-0.296882	0.106381	-2.79073	0.00525888	0.241696	38.7659	6.53231	0.162766	-2.04212	0.16749	-3.71865	-1.09539	-1.29111	-0.30336	0.0312517	-0.587077	-0.32592	-0.248071	0.0220675	0.0348152	0.0249241	0.0885293	0.0369173
51585	PCF11	-0.309352	0.110648	-2.79583	0.00517672	0.241696	22.4245	5.15627	0.271636	-0.0319474	-1.04572	-3.35797	-0.989175	-1.54843	-0.00659382	-0.251367	-0.631909	-0.27997	-0.305935	0.0425995	0.0577814	0.0354124	0.0801079	0.0390367
55512	SMPD3	0.381345	0.136064	2.80268	0.005068	0.241696	24.821	5.32063	0.255951	-0.0603324	0.226367	0.162685	3.4305	2.80053	-0.0184652	0.0788574	0.0692843	0.574651	0.61326	0.093671	0.121355	0.181373	0.0280605	0.0479524
23468	CBX5	-0.287841	0.102684	-2.80318	0.00506012	0.241696	17.3862	4.8418	0.303918	-0.649856	-2.80998	-2.29468	-1.08606	0.056268	-0.157438	-0.627952	-0.367543	-0.246504	0.0120655	0.0586926	0.0499398	0.025655	0.0515154	0.0459797
10513	APPBP2	-0.338103	0.12118	-2.79009	0.00526926	0.241696	41.6311	6.85297	0.143865	-0.821554	-0.980947	-4.31317	-1.15665	-0.869068	-0.169411	-0.225748	-0.727951	-0.270318	-0.179829	0.0425217	0.0529609	0.0284846	0.0546194	0.0428167
389677	RBM12B	-0.306916	0.110497	-2.77759	0.00547632	0.248082	0	1.93766	0.747225	-0.334789	-1.15567	-1.03957	-1.46805	-2.22915	-0.104885	-0.399311	-0.188025	-0.363959	-0.548787	0.0981484	0.119386	0.0327132	0.0614639	0.0606077
2162	F13A1	-0.364493	0.131311	-2.7758	0.0055066	0.248698	0	1.98023	0.739395	-0.872412	-1.01027	-2.18993	-1.56938	-0.80301	-0.218883	-0.330007	-0.667642	-0.56624	-0.21237	0.0629477	0.106703	0.0929455	0.13018	0.0699433
10116	FEM1B	0.34186	0.123259	2.77351	0.00554553	0.2497	35.4449	6.19626	0.184963	1.32998	0.327382	1.54094	0.307024	4.06323	0.312353	0.096399	0.338852	0.0682152	0.678055	0.0551575	0.0867034	0.0483556	0.0493648	0.0278476
3875	KRT18	0.220412	0.0795616	2.77033	0.00559992	0.251389	0	2.92147	0.571051	1.11035	1.38111	2.47592	0.469791	1.05119	0.171234	0.277223	0.489037	0.0733099	0.212761	0.0237826	0.0402904	0.0390132	0.024351	0.0409657
904	CCNT1	-0.25925	0.0936174	-2.76925	0.00561861	0.251471	0	2.00401	0.735021	-1.51065	-0.79399	-2.27185	-1.25329	-0.16795	-0.313399	-0.230028	-0.367589	-0.338219	-0.0323083	0.0430394	0.0839325	0.0261797	0.0728276	0.0370058
3227	HOXC11	-0.30735	0.111109	-2.76619	0.00567153	0.253079	0	0.995372	0.910497	-0.621176	-1.56	-0.76856	-1.92538	-1.23691	-0.143432	-0.438891	-0.289418	-0.413106	-0.270962	0.0533163	0.0791521	0.141806	0.0460352	0.0479889
5922	RASA2	-0.302476	0.109508	-2.76215	0.00574224	0.25471	0	2.50102	0.644454	-0.132036	-1.68126	-2.29061	-1.22816	-0.728779	-0.0378412	-0.531256	-0.475266	-0.297767	-0.15919	0.082138	0.0998473	0.0430496	0.0587821	0.0477134
79949	PLEKHS1	0.325194	0.117703	2.76284	0.00573006	0.25471	40.9508	6.77401	0.148324	0.259006	3.06583	1.13138	0.641065	3.02774	0.0558631	0.676802	0.331903	0.106555	0.479285	0.046519	0.0487334	0.0860611	0.0276274	0.0250582
51455	REV1	-0.321373	0.116483	-2.75896	0.00579856	0.256444	29.9438	5.7097	0.221902	-0.158454	-1.1945	-1.49992	-0.766138	-3.63484	-0.033074	-0.300317	-0.304448	-0.199445	-0.670276	0.0435678	0.0632105	0.0411993	0.0677694	0.0340046
79770	TXNDC15	-0.270487	0.0980835	-2.75773	0.0058205	0.256653	0	3.19584	0.525604	0.218176	-1.00453	-2.37809	-0.499744	-1.95938	0.0658121	-0.354691	-0.401925	-0.0955618	-0.41235	0.0909907	0.124674	0.028565	0.0365657	0.0442888
10576	CCT2	-0.28326	0.102896	-2.75289	0.00590718	0.257449	0	1.98598	0.738337	-1.55897	-0.168948	-0.792913	-1.45796	-2.08593	-0.326451	-0.0407241	-0.182155	-0.440732	-0.42105	0.043849	0.0581026	0.0527756	0.0913814	0.0407445
79875	THSD4	0.330325	0.119916	2.75464	0.0058757	0.257449	31.7715	5.86266	0.209643	0.878675	3.1708	0.589314	2.2592	0.769174	0.215967	0.877044	0.193227	0.379943	0.127356	0.0604113	0.0765076	0.107509	0.0282832	0.0274149
136242	PRSS37	-0.249146	0.0905044	-2.75286	0.00590764	0.257449	0	3.29355	0.509955	-0.84217	-1.11631	0.168288	-2.87514	-0.788479	-0.179848	-0.230639	0.0524728	-0.478848	-0.14302	0.0456049	0.0426874	0.0972221	0.0277382	0.0329013
220047	CCDC83	0.242249	0.0879153	2.75548	0.00586064	0.257449	0	2.22035	0.695306	0.408137	0.804907	1.16614	2.39463	1.38001	0.0746129	0.151218	0.436055	0.395861	0.263719	0.0334207	0.0352952	0.139823	0.0273282	0.0365191
55700	MAP7D1	-0.241857	0.0878985	-2.75155	0.00593145	0.257733	0	2.70305	0.608682	-0.449685	-1.30103	-1.01495	-0.559751	-2.65249	-0.0878705	-0.24935	-0.162453	-0.198725	-0.492136	0.0381829	0.0367318	0.0256192	0.126042	0.034424
54925	ZSCAN32	-0.27074	0.0985885	-2.74616	0.00602974	0.259851	0	1.66815	0.796494	-1.82291	-1.73426	-1.20538	-1.02874	-0.606326	-0.409548	-0.461903	-0.273416	-0.228155	-0.112189	0.050475	0.0709369	0.051452	0.049187	0.0342361
22818	COPZ1	-0.235641	0.0857678	-2.74743	0.00600637	0.259851	0	3.14209	0.534335	-1.89254	0.629075	-1.67525	-0.910781	-1.75415	-0.336241	0.159796	-0.225808	-0.290173	-0.35903	0.0315653	0.0645248	0.0181685	0.101504	0.0418917
131368	ZPLD1	0.22475	0.081846	2.74601	0.00603251	0.259851	0	3.47319	0.481967	1.06778	1.62261	-0.697507	0.951391	2.41849	0.203549	0.32917	-0.182755	0.167492	0.339883	0.0363394	0.0411539	0.0686505	0.0309933	0.0197502
9263	STK17A	-0.306657	0.111796	-2.743	0.00608807	0.261489	11.3424	4.51174	0.341158	-1.84332	-0.570666	-2.8889	-0.524511	-0.783544	-0.520351	-0.186444	-0.6299	-0.0979179	-0.174043	0.0796881	0.106742	0.0475419	0.034851	0.0493387
121642	ALKBH2	-0.373497	0.136236	-2.74153	0.00611529	0.261903	50.7829	8.12726	0.0870261	-2.79239	0.909521	-3.08898	-1.03062	-2.72685	-0.63836	0.26148	-0.559864	-0.221144	-0.495234	0.0522611	0.0826515	0.03285	0.0460419	0.0329836
26094	DCAF4	-0.300971	0.109895	-2.73872	0.00616786	0.263398	0	3.1416	0.534415	-0.9812	-0.0900759	-2.40784	-1.90038	-0.512048	-0.240193	-0.0271193	-0.620834	-0.393253	-0.125344	0.0599246	0.0906438	0.0664807	0.0428217	0.0599219
399665	FAM102A	-0.298927	0.109188	-2.73772	0.00618663	0.263444	0	3.84488	0.427405	-2.28766	-0.959319	-1.50416	-1.63116	0.512975	-0.510359	-0.273697	-0.312556	-0.432852	0.136419	0.0497701	0.0813979	0.0431787	0.0704183	0.0707227
8857	FCGBP	-0.334396	0.122193	-2.73663	0.00620714	0.263565	0	1.34959	0.852908	-1.10668	-1.33904	-1.82136	-1.28587	-0.922038	-0.290353	-0.34234	-0.748374	-0.369184	-0.211013	0.0688353	0.0653621	0.168828	0.0824309	0.0523746
23568	ARL2BP	-0.310395	0.113624	-2.73178	0.00629929	0.266718	41.6433	6.8544	0.143786	-0.206496	-0.65301	-3.8816	-1.12709	-2.20756	-0.0352161	-0.132806	-0.572298	-0.360223	-0.419942	0.0290844	0.0413616	0.0217381	0.102147	0.0361872
25926	NOL11	-0.262712	0.0962898	-2.72835	0.00636516	0.268743	0	1.56772	0.814582	-1.3295	-1.28519	-0.596257	-1.27657	-1.89926	-0.247479	-0.308661	-0.105941	-0.372461	-0.444775	0.0346498	0.0576805	0.0315692	0.085128	0.0548418
79612	NAA16	-0.338369	0.124249	-2.72332	0.006463	0.269659	45.3508	7.31941	0.119941	-0.169209	-0.997965	-2.70882	-0.817442	-3.54525	-0.0340923	-0.238271	-0.568146	-0.163058	-0.650744	0.0405944	0.0570051	0.0439906	0.0397898	0.033692
112802	KRT71	0.259689	0.0953834	2.72259	0.00647732	0.269659	0	3.82937	0.42959	0.644053	-0.243713	1.31202	2.47377	1.71077	0.131273	-0.0539273	0.363161	0.428791	0.39161	0.0415441	0.048962	0.0766162	0.030045	0.0523994
9908	G3BP2	-0.243968	0.0895543	-2.72425	0.00644484	0.269659	0	2.35986	0.669893	-2.09414	-0.00855579	-1.47714	-1.45559	-1.04653	-0.401173	-0.00183256	-0.248006	-0.411753	-0.198947	0.036699	0.0458769	0.0281893	0.0800193	0.0361387
10200	MPHOSPH6	-0.306064	0.112277	-2.72598	0.00641117	0.269659	0	1.42831	0.83926	-0.0934433	-1.3873	-0.83663	-2.10303	-1.34286	-0.0293177	-0.456532	-0.213063	-0.41572	-0.308689	0.098438	0.108294	0.064856	0.0390761	0.0528424
6167	RPL37	-0.244159	0.0896699	-2.72287	0.00647176	0.269659	0	2.01028	0.733867	-0.832909	-0.207041	-1.38815	-0.719342	-2.49866	-0.236891	-0.0544911	-0.228031	-0.138399	-0.431732	0.080891	0.0692686	0.0269846	0.0370166	0.0298548
162655	ZNF519	-0.255447	0.0939794	-2.71812	0.00656536	0.271053	0.648531	4.02611	0.402484	-2.29158	-1.62787	-1.60485	0.00956244	-0.987019	-0.459954	-0.390805	-0.428084	0.00167046	-0.197233	0.0402866	0.0576342	0.0711521	0.0305167	0.039931
221223	CES5A	0.270675	0.0995673	2.71851	0.00655765	0.271053	16.4741	4.78893	0.309648	1.50307	0.650618	1.26307	3.09626	0.0898968	0.316483	0.156167	0.333485	0.523149	0.0153867	0.0443342	0.0576139	0.0697097	0.028548	0.0292956
140701	ABHD16B	0.354047	0.130248	2.71825	0.00656275	0.271053	47.2077	7.57686	0.108368	-0.278928	3.05657	1.19306	1.87026	2.66482	-0.0530986	0.616643	0.459428	0.287475	0.580824	0.0362395	0.0407004	0.14829	0.0236263	0.0475067
54914	FOCAD	-0.240918	0.0887137	-2.71568	0.00661393	0.272304	0	1.59642	0.809435	-1.30036	-2.21061	-1.08554	-0.895919	-0.642301	-0.272422	-0.453431	-0.194945	-0.189487	-0.123275	0.0438892	0.0420725	0.0322504	0.0447325	0.0368361
2041	EPHA1	-0.305461	0.112733	-2.7096	0.00673638	0.276219	0	2.03011	0.73022	-1.68377	0.287745	-1.1449	-1.47963	-1.71875	-0.483754	0.0948294	-0.434047	-0.288764	-0.349737	0.082544	0.10861	0.143727	0.0380872	0.0414057
8508	NIPSNAP1	-0.282876	0.104416	-2.70912	0.0067461	0.276219	0	2.59449	0.627799	-1.25039	-0.787782	-2.02847	0.00335015	-1.90659	-0.332681	-0.209709	-0.4907	0.000761702	-0.36659	0.0707893	0.0708633	0.0585187	0.0516941	0.0369698
9701	PPP6R2	-0.32251	0.119182	-2.70604	0.00680918	0.277341	39.6946	6.6329	0.156607	-0.9811	-3.82783	-0.486752	-1.23389	-1.25114	-0.206342	-0.785716	-0.107931	-0.26178	-0.234972	0.0442334	0.0421334	0.0491674	0.0450111	0.0352709
26994	RNF11	-0.279781	0.103394	-2.70596	0.0068107	0.277341	0	1.08703	0.896325	-1.17225	-0.318252	-1.56476	-1.25263	-1.7077	-0.282006	-0.0822894	-0.262519	-0.446199	-0.403678	0.0578731	0.0668569	0.0281465	0.126886	0.0558788
1311	COMP	0.248995	0.0921056	2.70337	0.00686404	0.278751	0	2.59842	0.627102	2.48403	0.552132	0.889566	1.50188	0.620027	0.478941	0.119789	0.331915	0.28687	0.104595	0.0371751	0.0470705	0.139219	0.036484	0.0284576
113802	HENMT1	-0.247328	0.0915672	-2.70106	0.00691191	0.279174	0	0.978237	0.913078	-0.97212	-0.867002	-1.42379	-0.828528	-1.96561	-0.170804	-0.1755	-0.261391	-0.250012	-0.420819	0.0308713	0.0409745	0.0337048	0.0910559	0.0458349
4863	NPAT	-0.404231	0.149625	-2.70163	0.00690009	0.279174	48.3901	7.75046	0.101159	-1.32564	-0.917847	-0.730957	-0.873805	-4.64217	-0.308641	-0.26332	-0.214177	-0.19706	-0.872824	0.0542068	0.0823051	0.0858547	0.0508589	0.0353517
51503	CWC15	-0.235766	0.0873313	-2.69967	0.00694089	0.279586	0	1.39991	0.844211	-1.90105	-1.89174	-0.927144	-0.73045	-0.319851	-0.309251	-0.366448	-0.145821	-0.236138	-0.078305	0.0264628	0.0375235	0.0247371	0.104508	0.0599354
1269	CNR2	0.274513	0.101762	2.6976	0.00698421	0.280573	0	1.43162	0.838681	0.401985	0.289619	1.60616	1.93493	1.46269	0.108911	0.0826549	0.495284	0.320886	0.29989	0.0734047	0.0814483	0.0950892	0.0275025	0.0420356
2547	XRCC6	-0.373307	0.138498	-2.6954	0.00703041	0.280915	52.2711	8.38067	0.0785878	-2.19756	0.381601	-4.4233	-0.761611	-1.86128	-0.40634	0.0939536	-0.739788	-0.245345	-0.367862	0.0341901	0.0606187	0.0279719	0.103773	0.0390615
9126	SMC3	-0.279441	0.103653	-2.69592	0.0070194	0.280915	0	3.34005	0.502612	-0.00362219	-1.00789	-1.31337	-0.751182	-2.7024	-0.00103459	-0.323315	-0.21918	-0.19183	-0.606414	0.0815822	0.102901	0.0278503	0.0652144	0.0503545
29945	ANAPC4	-0.250083	0.0929263	-2.6912	0.00711957	0.283717	10.4677	4.46766	0.346399	0.0813939	-0.984096	-3.15065	-0.992052	-1.03845	0.0151703	-0.19535	-0.483695	-0.293345	-0.21366	0.0347378	0.0394049	0.0235691	0.0874359	0.0423325
1537	CYC1	-0.263768	0.0980866	-2.68913	0.00716375	0.284716	0	0.36953	0.984895	-1.72279	-0.740149	-1.04624	-0.64063	-1.60628	-0.329072	-0.164562	-0.258686	-0.207522	-0.291259	0.0364853	0.0494338	0.0611341	0.104933	0.0328787
6280	S100A9	0.2619	0.0974708	2.68696	0.00721061	0.285058	0	0.503659	0.973144	1.68513	1.7544	0.949989	0.266766	0.912236	0.25733	0.32968	0.429241	0.124549	0.184038	0.0233193	0.0353123	0.204157	0.217982	0.0407005
10749	KIF1C	0.251337	0.0935173	2.6876	0.00719669	0.285058	0	0.979871	0.912833	1.1825	1.18629	1.12577	1.93994	0.605611	0.30975	0.333501	0.199774	0.354906	0.119966	0.0686149	0.0790338	0.0314902	0.0334696	0.0392401
10813	UTP14A	-0.249126	0.0927578	-2.68576	0.0072364	0.285321	0	1.36918	0.849534	-1.31489	-0.531094	-1.64165	-1.82764	-0.732298	-0.217531	-0.104615	-0.349331	-0.418662	-0.204891	0.0273695	0.0388012	0.0452809	0.0524742	0.0782832
5511	PPP1R8	-0.223294	0.0831975	-2.6839	0.0072768	0.285404	12.2826	4.5601	0.335481	0.551999	-1.27447	-2.32934	-1.27165	-2.01669	0.0977603	-0.245793	-0.308219	-0.242806	-0.408958	0.0313653	0.0371944	0.0175086	0.036457	0.0411226
56751	BARHL1	0.332917	0.124025	2.68428	0.00726866	0.285404	42.4847	6.95467	0.138303	0.287927	3.10727	1.12787	0.636172	2.82496	0.0569224	0.645369	0.379389	0.111087	0.532241	0.0390841	0.0431377	0.113149	0.0304911	0.0354969
132299	OCIAD2	-0.31814	0.118649	-2.68136	0.0073323	0.285677	6.1405	4.26169	0.371747	-2.8309	0.260831	-0.975109	-1.43912	-0.979245	-0.60377	0.0688033	-0.290683	-0.445223	-0.230313	0.0454877	0.0695825	0.0888654	0.0957103	0.0553164
338557	FFAR4	0.304224	0.113475	2.68098	0.00734076	0.285677	36.6709	6.31621	0.176745	1.10194	3.34323	1.80834	1.36167	-0.0153706	0.220558	0.687667	0.440029	0.220938	-0.00326508	0.0400617	0.042308	0.0592111	0.0263267	0.0451238
5160	PDHA1	-0.309291	0.115366	-2.68095	0.00734128	0.285677	26.7763	5.46271	0.243027	0.241607	-1.88954	-2.44751	-0.49987	-2.38188	0.0505981	-0.459296	-0.54165	-0.128155	-0.444989	0.0438579	0.0590845	0.0489767	0.0657293	0.0349028
162427	RETREG3	0.242796	0.0907283	2.67608	0.00744889	0.286869	0	3.01745	0.554909	2.38831	0.939112	1.41268	1.1662	0.487018	0.640183	0.298427	0.239676	0.206236	0.0875477	0.0718498	0.100981	0.0287846	0.031274	0.0323146
7511	XPNPEP1	-0.248473	0.092791	-2.67777	0.00741136	0.286869	3.1125	4.1285	0.388895	-2.27188	0.112722	-0.508696	-1.11451	-2.21229	-0.41095	0.0238648	-0.0927579	-0.353885	-0.421997	0.0327196	0.0448227	0.0332495	0.100823	0.036386
84618	NT5C1A	0.256539	0.0958134	2.67749	0.00741769	0.286869	0	1.11524	0.891847	1.46815	0.534514	0.06525	2.12243	1.155	0.351149	0.125085	0.0276339	0.344342	0.212215	0.0572063	0.0547633	0.17936	0.0263216	0.0337587
2290	FOXG1	-0.252795	0.0944481	-2.67655	0.00743847	0.286869	0	2.82749	0.587098	-0.194017	-1.50658	-0.410455	-1.12082	-2.50185	-0.0450682	-0.379732	-0.113844	-0.184791	-0.47246	0.0539589	0.0635288	0.0769285	0.0271826	0.0356619
79672	FN3KRP	-0.338656	0.126816	-2.67045	0.0075749	0.287059	35.9896	6.24898	0.18131	-2.22752	-2.75644	-2.10331	-0.575094	0.201759	-0.499843	-0.618364	-0.462115	-0.152945	0.0417787	0.0503526	0.0503258	0.048272	0.0707282	0.0428787
5926	ARID4A	-0.324919	0.121546	-2.67322	0.00751278	0.287059	33.9446	6.05552	0.19504	0.0661718	-1.73499	-3.23477	-0.349806	-2.14168	0.0162403	-0.523147	-0.534181	-0.0708251	-0.490456	0.0602337	0.0909193	0.0272704	0.0409939	0.0524434
6100	RP9	-0.325411	0.121728	-2.67327	0.00751168	0.287059	39.5042	6.61203	0.157867	-1.03576	-0.351447	-4.1713	-1.5718	-0.535346	-0.239827	-0.0792826	-0.659348	-0.377904	-0.118051	0.0536136	0.0508903	0.0249854	0.0578055	0.048626
55884	WSB2	0.465036	0.174181	2.66984	0.00758866	0.287059	56.4174	9.17798	0.0568015	1.34198	0.00736268	4.44812	0.0505721	3.64342	0.45719	0.00329635	0.692427	0.0119513	0.846284	0.116065	0.200445	0.0242323	0.0558479	0.0539529
221545	C6orf136	-0.344443	0.128802	-2.67421	0.00749047	0.287059	49.6515	7.94462	0.093628	0.289229	-1.23653	-3.48783	-1.06366	-2.9769	0.0577591	-0.302077	-0.593364	-0.236258	-0.586299	0.0398801	0.0596799	0.0289421	0.0493362	0.0387891
64428	NARFL	-0.225533	0.0844531	-2.67052	0.00757345	0.287059	0	3.01239	0.555755	-1.01055	-0.0694853	-1.07129	-1.22259	-2.54473	-0.191801	-0.0137395	-0.175934	-0.278234	-0.460893	0.0360238	0.0390982	0.0269702	0.0517921	0.0328033
83591	THAP2	0.293666	0.10989	2.67237	0.00753171	0.287059	27.6184	5.52626	0.237431	-0.518366	2.1518	1.7856	1.44421	2.2788	-0.113378	0.528225	0.439309	0.231248	0.454558	0.0478395	0.0602607	0.0605303	0.0256389	0.0397895
63924	CIDEC	0.252201	0.0945029	2.66871	0.00761431	0.2873	10.1103	4.4499	0.34853	0.215517	1.55035	2.83434	0.904991	0.985824	0.0439983	0.34388	0.611147	0.145694	0.214012	0.041678	0.0491991	0.0464928	0.0259176	0.0471279
378	ARF4	-0.308411	0.115766	-2.66408	0.00771985	0.289758	8.53484	4.37325	0.357842	-0.324026	-0.752687	-1.30547	-0.866601	-3.00751	-0.0755509	-0.208509	-0.251031	-0.299683	-0.753543	0.0543651	0.0767401	0.0369764	0.119587	0.062777
960	CD44	-0.294395	0.110469	-2.66495	0.0076999	0.289758	0	3.32063	0.50567	-0.958267	-0.689507	0.190756	-0.456393	-2.96382	-0.202892	-0.189053	0.0635023	-0.182308	-0.531933	0.0448289	0.0751781	0.110821	0.159564	0.0322114
10199	MPHOSPH10	-0.249735	0.0937689	-2.6633	0.00773777	0.289758	0	1.50196	0.826294	-0.819494	-0.173762	-2.36169	-1.1273	-1.02224	-0.196742	-0.0404938	-0.376916	-0.261367	-0.227981	0.0576369	0.0543088	0.0254707	0.0537556	0.0497382
10146	G3BP1	-0.248323	0.0933424	-2.66034	0.00780608	0.291583	0	3.21269	0.522884	-0.116025	-0.391656	-2.80192	-1.19812	-0.91487	-0.0262783	-0.137281	-0.493569	-0.243426	-0.165149	0.0512965	0.122861	0.0310301	0.0412791	0.0325863
2744	GLS	-0.304322	0.114452	-2.65894	0.00783861	0.292067	28.6394	5.60534	0.230624	0.278347	-1.55295	-2.7546	-0.872332	-2.16445	0.0524363	-0.382518	-0.537313	-0.236574	-0.436574	0.0354887	0.0606716	0.0380485	0.0735481	0.0406837
55109	AGGF1	-0.246352	0.0926796	-2.6581	0.00785823	0.292067	0	1.04054	0.903588	-0.912823	-0.949931	-2.2817	-0.546479	-0.930393	-0.196839	-0.234924	-0.379677	-0.12605	-0.191299	0.0464996	0.0611602	0.0276893	0.0532037	0.0422757
8556	CDC14A	-0.349808	0.131769	-2.6547	0.00793778	0.29211	44.4331	7.19853	0.125762	-1.81674	-2.59867	-2.43935	-1.59497	0.401355	-0.382841	-0.599673	-0.653485	-0.323771	0.0790759	0.0444071	0.0532507	0.0717667	0.0412068	0.0388178
7352	UCP3	0.243597	0.0917353	2.65544	0.0079206	0.29211	0	2.87238	0.579404	1.20328	-0.0753727	-0.105909	2.20728	1.8939	0.253746	-0.0191774	-0.0291241	0.358901	0.346655	0.04447	0.0647367	0.0756212	0.0264384	0.0335027
25770	C22orf31	0.252867	0.0952283	2.65538	0.00792196	0.29211	0	3.7742	0.437426	1.61072	-0.0602415	0.371217	2.77376	0.629009	0.328862	-0.0133512	0.153423	0.476348	0.122973	0.0416855	0.0491185	0.170814	0.0294926	0.038221
8473	OGT	-0.271634	0.102289	-2.65554	0.00791815	0.29211	0	0.467642	0.976574	-1.14544	-0.496736	-1.44867	-1.26174	-1.50669	-0.334666	-0.196445	-0.22762	-0.483858	-0.274355	0.0853646	0.156397	0.0246877	0.147061	0.0331572
26012	NSMF	-0.241984	0.0914928	-2.64484	0.00817289	0.292583	0	1.43606	0.837904	-0.573885	-0.843535	-2.47275	-0.526493	-0.999338	-0.142966	-0.240632	-0.386793	-0.117135	-0.182494	0.0620607	0.0813765	0.024468	0.0494983	0.0333482
145264	SERPINA12	0.244016	0.0922624	2.6448	0.00817389	0.292583	0	3.6067	0.461841	0.14708	2.68102	0.414607	1.46509	1.03623	0.0284315	0.553828	0.135664	0.235479	0.236297	0.0373672	0.0426726	0.107067	0.0258331	0.0520002
80301	PLEKHO2	0.283851	0.107027	2.65214	0.00799825	0.292583	0	2.0033	0.735151	1.7297	0.989376	1.12605	-0.218171	1.93671	0.418844	0.296921	0.235426	-0.0650419	0.38724	0.0586355	0.0900657	0.0437109	0.0888772	0.0399791
138428	PTRH1	-0.259444	0.0979524	-2.64867	0.00808082	0.292583	0	0.730339	0.947536	-1.85857	-0.781214	-1.41219	-0.880419	-0.954891	-0.416452	-0.200728	-0.275831	-0.180823	-0.217685	0.0502078	0.0660202	0.0381506	0.0421823	0.0519699
92106	OXNAD1	-0.311187	0.117525	-2.64783	0.00810099	0.292583	0	3.5782	0.466088	-2.09827	-1.83388	-0.383828	-1.62981	-0.140566	-0.538714	-0.53606	-0.126736	-0.423764	-0.030272	0.0659164	0.0854448	0.109024	0.0676043	0.046379
285268	ZNF621	-0.23779	0.0898295	-2.64713	0.00811779	0.292583	0	1.11878	0.891282	-1.37805	-1.39117	0.194023	-1.29326	-1.60672	-0.211332	-0.301837	0.0627298	-0.292416	-0.288408	0.0235181	0.0470746	0.10453	0.0511249	0.0322206
51277	DNAJC27	-0.268233	0.101438	-2.64429	0.0081862	0.292583	15.3535	4.72553	0.316636	-0.817969	0.250858	-2.81478	-0.522824	-2.13234	-0.174051	0.0639571	-0.514512	-0.11438	-0.406734	0.0452773	0.065001	0.033412	0.0478619	0.0363837
84101	USP44	-0.308794	0.116447	-2.65179	0.0080066	0.292583	28.6672	5.60752	0.230439	-0.734986	-2.65855	-1.04219	-0.527412	-2.38407	-0.148774	-0.582935	-0.462254	-0.0797395	-0.547377	0.0409726	0.0480784	0.196728	0.0228584	0.0527148
3398	ID2	-0.280318	0.105953	-2.64568	0.0081526	0.292583	0	1.86378	0.760794	-0.367857	-1.34567	-1.06935	-0.790164	-2.26923	-0.0819189	-0.393159	-0.209523	-0.302036	-0.460267	0.0495918	0.0853605	0.0383908	0.146111	0.0411398
9731	CEP104	0.25983	0.0980708	2.64942	0.00806312	0.292583	0	3.60438	0.462186	0.503459	1.88519	2.09002	0.150214	1.55743	0.139851	0.546178	0.469804	0.0279507	0.28235	0.0771621	0.0839378	0.0505279	0.0346227	0.0328668
26260	FBXO25	0.275553	0.10405	2.64829	0.00809005	0.292583	35.6044	6.21161	0.183893	-0.153207	1.38661	2.75103	0.38371	2.94835	-0.0365862	0.374588	0.445137	0.0600329	0.458162	0.0570265	0.0729791	0.0261815	0.0244778	0.0241479
28977	MRPL42	-0.276067	0.104308	-2.64666	0.00812907	0.292583	0	0.200882	0.995281	-0.70002	-1.13378	-1.39118	-1.47816	-1.1445	-0.199114	-0.385951	-0.256928	-0.298898	-0.276398	0.0809062	0.11588	0.0341081	0.0408885	0.0583229
9406	ZRANB2	-0.253977	0.096143	-2.64166	0.00825007	0.293041	0	1.76862	0.778219	-0.762323	-2.33766	-1.11859	-0.795224	-0.904188	-0.163127	-0.5128	-0.202368	-0.237267	-0.185425	0.0457903	0.0481208	0.0327297	0.0890215	0.0420553
91862	MARVELD3	0.244108	0.0924465	2.64053	0.00827767	0.293041	15.7301	4.74665	0.314294	0.63783	2.30868	-0.854773	1.97608	1.76561	0.103737	0.418532	-0.276189	0.314869	0.35062	0.0264522	0.0328647	0.104403	0.0253894	0.0394351
5496	PPM1G	-0.241283	0.0913194	-2.64218	0.00823731	0.293041	0	3.87547	0.423121	0.153457	-0.521638	-1.76057	-0.813324	-2.60765	0.0297526	-0.134964	-0.284649	-0.250196	-0.479685	0.0375904	0.0669423	0.0261405	0.0946312	0.0338386
140881	DEFB129	0.257262	0.09741	2.64102	0.00826557	0.293041	0	2.79619	0.59249	0.642286	0.333845	-0.374016	1.77201	2.44281	0.171036	0.0971342	-0.119711	0.289695	0.429841	0.070912	0.0846551	0.102444	0.0267269	0.0309627
29965	CDIP1	-0.259526	0.0984279	-2.63671	0.00837146	0.295659	4.73878	4.19898	0.379746	-0.527418	0.954126	-2.07934	-1.34218	-2.10917	-0.153699	0.300664	-0.332956	-0.269274	-0.429179	0.0849249	0.0993005	0.0256402	0.0402503	0.0414053
56246	MRAP	0.233508	0.0886027	2.63545	0.00840248	0.296035	0	1.99909	0.735926	0.450251	0.265306	0.779698	2.06419	1.95008	0.0918995	0.0569868	0.238524	0.304423	0.3897	0.0416598	0.0461374	0.0935863	0.0217499	0.0399354
84707	BEX2	-0.316524	0.120174	-2.63387	0.00844169	0.296035	10.8549	4.48707	0.344084	-1.67921	0.538926	-1.93792	-1.36379	-1.89084	-0.379867	0.138417	-0.651475	-0.342119	-0.435856	0.0511744	0.0659665	0.113012	0.0629304	0.0531347
11215	AKAP11	-0.263366	0.0999621	-2.63465	0.00842229	0.296035	0	0.735906	0.946828	-0.772217	-0.881037	-1.95183	-1.18257	-1.04722	-0.16515	-0.252167	-0.401228	-0.281296	-0.210853	0.0457381	0.0819199	0.042257	0.0565814	0.0405402
285533	RNF175	0.292461	0.111177	2.63059	0.0085236	0.297926	0	2.09773	0.71779	1.10246	0.662168	2.06082	0.762361	1.59239	0.312392	0.220606	0.601988	0.136441	0.392006	0.080292	0.110993	0.0853291	0.0320309	0.0606017
6727	SRP14	-0.244308	0.0928889	-2.63012	0.00853559	0.297926	2.33823	4.09577	0.3932	-2.18173	-1.21206	-2.17422	-0.495193	0.0523473	-0.483593	-0.336956	-0.336289	-0.194412	0.00845395	0.0491312	0.077286	0.0239231	0.154134	0.0260814
112939	NACC1	0.254019	0.0966381	2.62856	0.00857483	0.298038	0	2.18637	0.701525	0.402632	0.12655	2.36404	1.40235	1.16716	0.101239	0.0361948	0.478152	0.256423	0.234921	0.0632234	0.0818028	0.0409094	0.0334349	0.0405118
10913	EDAR	-0.323588	0.123112	-2.6284	0.0085788	0.298038	9.55769	4.42271	0.351811	-0.70509	-0.28723	-0.338899	-3.40514	-0.707718	-0.221394	-0.0998861	-0.118432	-0.652083	-0.152972	0.0985925	0.120934	0.122122	0.0366721	0.04672
10393	ANAPC10	-0.240762	0.091643	-2.62718	0.00860968	0.298415	0	1.92543	0.749473	-1.00711	-0.0322972	-2.23059	-1.57061	-0.608149	-0.214156	-0.00870764	-0.352227	-0.372202	-0.120939	0.0452179	0.0726895	0.0249348	0.0561594	0.039547
83606	GUCD1	0.272771	0.103916	2.62492	0.00866682	0.299699	0	3.44586	0.486158	1.47125	0.92469	2.6454	-0.356707	0.437111	0.300266	0.214502	0.53352	-0.136093	0.101467	0.0416523	0.0538111	0.0406741	0.145561	0.0538848
7554	ZNF8	-0.321685	0.122622	-2.62339	0.00870601	0.300357	43.8243	7.12051	0.129655	0.441021	-1.16677	-3.53008	-1.42216	-2.12778	0.10051	-0.299735	-0.655175	-0.246219	-0.427444	0.05194	0.0659946	0.0344466	0.0299744	0.0403556
121536	AEBP2	-0.241665	0.0921499	-2.62252	0.00872833	0.300432	0	2.5181	0.641398	-0.958093	-1.65905	-2.16994	-0.995795	-0.158261	-0.265864	-0.438956	-0.363675	-0.201786	-0.0286392	0.0770022	0.0700041	0.0280886	0.0410621	0.0327473
28954	REM1	-0.320746	0.122351	-2.62152	0.00875394	0.300619	39.3087	6.59073	0.159163	-1.05185	-1.56579	-2.67599	-0.0957363	-2.36565	-0.223643	-0.380452	-0.753004	-0.0155593	-0.465586	0.0452068	0.059038	0.0791816	0.0264136	0.0387345
1738	DLD	-0.361094	0.137842	-2.61963	0.00880259	0.300903	48.3965	7.75141	0.101121	0.811023	-2.29158	-3.20548	-1.28441	-2.2909	0.19822	-0.651831	-0.566935	-0.314638	-0.422507	0.0597352	0.0809095	0.0312809	0.060009	0.0340138
139596	UPRT	-0.246086	0.0939379	-2.61966	0.00880167	0.300903	0	1.77186	0.777626	-0.831296	-2.18459	-1.13337	-1.31723	-0.389055	-0.154132	-0.452845	-0.224346	-0.316422	-0.0914215	0.0343773	0.0429693	0.0391825	0.0577044	0.0552172
6453	ITSN1	-0.375326	0.143443	-2.61654	0.00888247	0.302313	46.1499	7.42803	0.114925	0.0832961	-1.91187	-3.56737	-0.609455	-1.98675	0.020848	-0.500741	-0.73918	-0.129093	-0.50528	0.062644	0.0685979	0.0429344	0.0448666	0.0646811
8928	FOXH1	0.358082	0.136979	2.61414	0.00894525	0.302313	54.5087	8.79289	0.0664899	1.76815	3.44398	-0.50113	1.17672	2.8142	0.37346	0.848413	-0.138864	0.18949	0.48058	0.0446116	0.0606866	0.0767858	0.0259313	0.0291622
56125	PCDHB11	0.236957	0.0905686	2.61633	0.00888809	0.302313	18.1682	4.88808	0.298976	-0.610554	1.48001	2.4505	1.49813	1.61448	-0.118017	0.332555	0.427611	0.225951	0.306962	0.0373626	0.050489	0.03045	0.0227471	0.0361497
56302	TRPV5	0.229387	0.0877402	2.61438	0.00893885	0.302313	0	3.34003	0.502615	1.38975	0.64863	0.625088	2.7232	0.127906	0.294455	0.137231	0.194518	0.425786	0.0219196	0.0448913	0.0447622	0.0968362	0.024447	0.0293683
79109	MAPKAP1	0.233687	0.0893635	2.61502	0.00892223	0.302313	9.71976	4.43065	0.35085	1.41779	0.117135	2.65364	-0.238409	1.78383	0.283008	0.0302809	0.466405	-0.048239	0.269869	0.0398448	0.0668294	0.0308918	0.0409402	0.0228876
154197	PNLDC1	0.236004	0.0904715	2.6086	0.00909133	0.304488	0	2.69754	0.609646	0.313715	0.652413	0.145365	2.66445	1.36302	0.0664784	0.135115	0.058619	0.452412	0.227952	0.0449047	0.0428907	0.162613	0.0288305	0.0279691
8493	PPM1D	-0.260292	0.0996976	-2.61081	0.00903277	0.304488	0	1.51103	0.824686	-0.244262	-0.312374	-2.24856	-1.152	-1.33679	-0.060559	-0.101087	-0.399988	-0.271932	-0.266077	0.0614675	0.104723	0.0316435	0.0557206	0.0396178
3945	LDHB	-0.284273	0.108935	-2.60956	0.00906588	0.304488	0	0.556619	0.96776	-1.38971	-0.798732	-1.1562	-1.46152	-1.15079	-0.319974	-0.240934	-0.233649	-0.510203	-0.246917	0.0530131	0.09099	0.0408378	0.121864	0.0460371
6949	TCOF1	0.235835	0.0903944	2.60896	0.00908187	0.304488	19.4748	4.96739	0.29066	1.14134	0.52455	2.72887	2.17799	-0.279224	0.210607	0.111677	0.476125	0.336971	-0.053389	0.0340498	0.0453271	0.0304421	0.0239372	0.0365594
9367	RAB9A	-0.342967	0.131572	-2.60669	0.00914232	0.305509	46.0919	7.42003	0.115288	0.145727	-2.75499	-1.03757	-1.32661	-3.01137	0.0277215	-0.577705	-0.204063	-0.401235	-0.625385	0.036187	0.0439715	0.0386804	0.0914764	0.0431289
93190	C1orf158	0.24581	0.0943872	2.60428	0.00920685	0.30663	0	0.806552	0.937568	1.8558	0.918639	0.555153	1.52151	0.823241	0.40675	0.21592	0.200373	0.248997	0.154713	0.0480385	0.0552456	0.130272	0.0267818	0.0353181
29930	PCDHB1	0.224211	0.0861058	2.6039	0.00921701	0.30663	0	2.43429	0.65644	1.82563	1.12258	1.29914	1.69532	-0.244083	0.332869	0.208468	0.329822	0.280292	-0.0501371	0.0332447	0.0344857	0.0644533	0.0273349	0.0421935
55654	TMEM127	0.234966	0.0903355	2.60104	0.00929423	0.30851	4.65657	4.19536	0.380212	1.27245	1.50193	1.39096	-0.629991	2.27143	0.255928	0.395695	0.212043	-0.144085	0.4269	0.0404536	0.0694103	0.0232392	0.0523083	0.0353229
6206	RPS12	-0.242869	0.0934359	-2.59931	0.00934125	0.308696	0	3.37664	0.496882	-1.68636	-0.546481	-0.387863	-0.64914	-2.53352	-0.262151	-0.0912544	-0.103611	-0.283182	-0.596621	0.0241658	0.0278842	0.0713605	0.190307	0.0554558
2890	GRIA1	0.250663	0.0964307	2.59941	0.00933838	0.308696	0	0.324676	0.988166	1.48412	0.545895	0.89446	1.55116	1.17253	0.340075	0.149534	0.302113	0.244028	0.229968	0.0525062	0.0750343	0.114082	0.0247494	0.0384666
4521	NUDT1	-0.24314	0.0937986	-2.59215	0.00953784	0.311025	0	2.18108	0.702494	-0.866777	-0.251725	-2.58506	-1.09776	-0.444997	-0.183358	-0.0671943	-0.420092	-0.261334	-0.0953794	0.044749	0.0712545	0.0264087	0.0566729	0.0459404
1522	CTSZ	0.267506	0.103242	2.59105	0.00956827	0.311025	0	2.31297	0.678408	0.441116	0.969443	0.835424	0.278268	2.66773	0.100011	0.230773	0.211758	0.0882947	0.477446	0.0514033	0.0566666	0.0642492	0.10068	0.0320307
5631	PRPS1	-0.235054	0.0906427	-2.59319	0.00950892	0.311025	0	3.66377	0.453417	-0.573541	-1.46478	-0.0191513	-1.33669	-2.47523	-0.0922607	-0.279997	-0.00458591	-0.381519	-0.485581	0.0258764	0.0365395	0.0573398	0.0814644	0.0384849
55691	FRMD4A	-0.314818	0.121485	-2.59141	0.00955833	0.311025	8.30449	4.36226	0.359193	-0.175904	-0.19266	-1.8986	-0.128103	-2.91722	-0.0637095	-0.0694099	-0.462116	-0.0311236	-0.568147	0.131177	0.129795	0.0592426	0.0590283	0.03793
836	CASP3	-0.262059	0.101155	-2.59068	0.00957866	0.311025	0	1.96514	0.742171	-0.19727	-1.17241	-2.26347	-1.3556	-0.54984	-0.045294	-0.296413	-0.405662	-0.353375	-0.13232	0.0527179	0.0639198	0.0321201	0.0679531	0.0579131
56851	EMC7	-0.216755	0.0835849	-2.59323	0.00950793	0.311025	0	3.74047	0.442267	-2.05513	0.35245	-1.23843	-0.490238	-2.0841	-0.315834	0.0645022	-0.203324	-0.178682	-0.406315	0.0236176	0.0334931	0.0269547	0.132846	0.0380092
11269	DDX19B	-0.333821	0.12882	-2.59138	0.00955923	0.311025	56.1208	9.11594	0.058266	-1.72377	-3.02611	0.154015	-0.984947	-3.11132	-0.332547	-0.573071	0.0247506	-0.207173	-0.642954	0.0372178	0.035863	0.0258254	0.0442425	0.042704
3184	HNRNPD	-0.228332	0.088077	-2.59242	0.00953044	0.311025	0	2.96754	0.563272	-0.660141	-0.903572	-2.76335	-0.654032	-0.609993	-0.1081	-0.193879	-0.470502	-0.252493	-0.113884	0.0268151	0.0460403	0.0289902	0.149039	0.0348556
156	GRK2	0.351388	0.135697	2.58951	0.00961135	0.311375	58.8795	9.72751	0.0452766	0.395027	1.35598	1.267	1.52499	4.49855	0.0752773	0.277097	0.281683	0.258648	0.861812	0.036314	0.0417593	0.0494271	0.0287661	0.0367012
220001	VWCE	0.301452	0.116445	2.5888	0.00963123	0.311375	0	0.520328	0.971492	0.888627	1.07439	1.12069	1.74792	0.983378	0.277136	0.407809	0.252304	0.424943	0.220565	0.0972627	0.144074	0.0506844	0.0591043	0.0503072
203286	ANKS6	0.2241	0.0867231	2.58409	0.00976367	0.314535	11.5582	4.52275	0.339859	0.00903074	2.7326	0.690567	1.79986	0.963525	0.001879	0.587474	0.129132	0.277304	0.16014	0.0432918	0.0462194	0.034967	0.0237374	0.0276232
3851	KRT4	0.470782	0.182203	2.58382	0.00977119	0.314535	63.6591	11.0069	0.0264869	2.36206	3.25653	-0.602651	0.17374	4.65707	0.462488	0.751609	-0.307692	0.0431886	0.881836	0.0383369	0.0532689	0.260675	0.0617931	0.0358549
254240	BPIFC	0.337499	0.130747	2.58132	0.00984236	0.316143	58.9063	9.73385	0.0451578	0.656898	2.11851	3.38444	3.05384	-0.204791	0.13397	0.441149	0.660399	0.503045	-0.0350232	0.0415931	0.0433618	0.0380749	0.0271345	0.0292476
2130	EWSR1	-0.23452	0.0909031	-2.57989	0.00988307	0.316768	0	2.53195	0.638924	-0.976339	-0.832215	-2.5934	-0.304352	-0.850677	-0.174703	-0.189117	-0.503121	-0.0931802	-0.14768	0.0320184	0.0516403	0.0376363	0.0937337	0.0301382
116225	ZMYND19	-0.314928	0.12217	-2.57778	0.00994378	0.317363	37.2266	6.37212	0.173028	-1.66993	0.414164	-1.72375	-0.887274	-3.30946	-0.314144	0.109267	-0.367803	-0.18962	-0.709705	0.0353882	0.0696042	0.0455283	0.0456721	0.0459876
6391	SDHC	0.213392	0.082782	2.57776	0.00994421	0.317363	0	2.16301	0.705808	0.802162	1.18829	1.6765	-0.473483	1.92809	0.159185	0.253488	0.245977	-0.125931	0.312916	0.0393805	0.0455057	0.021527	0.0707391	0.0263392
57684	ZBTB26	0.272519	0.10579	2.57603	0.00999407	0.318273	9.76259	4.43275	0.350596	0.43691	-0.0908205	0.0389824	3.25552	1.40362	0.107346	-0.0264225	0.0125888	0.508969	0.288257	0.0603655	0.0846407	0.104288	0.0244422	0.0421756
79902	NUP85	-0.240963	0.0936495	-2.57303	0.0100811	0.319061	0	2.10624	0.716226	-1.67577	-0.0126361	-2.01309	-0.754908	-1.13841	-0.28295	-0.00265736	-0.423552	-0.217078	-0.244656	0.0285096	0.0442254	0.0442678	0.0826883	0.0461864
56916	SMARCAD1	-0.341827	0.132846	-2.57311	0.010079	0.319061	40.3494	6.70572	0.152281	0.0829843	-0.362915	-3.17031	-0.694183	-3.20553	0.0231436	-0.111283	-0.526645	-0.155127	-0.687984	0.0777804	0.0940263	0.0275951	0.0499373	0.0460634
3467	IFNW1	0.232924	0.0905415	2.57257	0.0100946	0.319061	0	0.0897982	0.999022	1.03243	1.02156	1.00589	1.44622	1.22272	0.259598	0.264277	0.284999	0.21318	0.213673	0.0632239	0.0669256	0.0802754	0.0217282	0.0305385
6152	RPL24	-0.23208	0.0902251	-2.57223	0.0101044	0.319061	0	0.596693	0.96343	-0.617517	-0.5067	-1.63634	-0.728547	-1.83484	-0.162597	-0.113823	-0.235662	-0.312009	-0.310432	0.0693309	0.050461	0.0207412	0.183408	0.0286244
150771	ITPRIPL1	-0.220321	0.0856856	-2.57127	0.0101327	0.319276	0	1.46321	0.833137	-1.5016	-0.53323	0.135028	-2.20205	-0.817455	-0.249024	-0.112553	0.0453525	-0.324026	-0.172919	0.0275025	0.0445535	0.112811	0.0216524	0.0447465
22983	MAST1	0.23118	0.0899552	2.56995	0.0101713	0.319818	0	1.6365	0.802217	0.418624	1.98843	0.958577	1.32553	1.1984	0.0779767	0.454576	0.24146	0.224407	0.239806	0.0346962	0.0522631	0.0634507	0.0286614	0.040042
3709	ITPR2	-0.358974	0.139769	-2.56835	0.0102184	0.320622	49.3256	7.89353	0.0955573	-1.59057	-0.315045	-4.47494	-0.413219	-1.36699	-0.392709	-0.0896699	-0.769796	-0.0966377	-0.273432	0.0609586	0.0810118	0.0295922	0.0546932	0.0400103
314	AOC2	0.263697	0.102715	2.56726	0.0102505	0.320953	0	2.94016	0.567888	0.154646	1.70877	0.684023	1.1068	2.2123	0.0362519	0.390249	0.280865	0.182392	0.577843	0.0549521	0.0521574	0.168598	0.0271567	0.068223
689	BTF3	-0.251229	0.0982171	-2.5579	0.0105307	0.321062	0	3.78403	0.436023	-1.59475	-0.474197	0.177531	-0.752294	-2.63843	-0.30075	-0.113243	0.0380572	-0.335395	-0.472206	0.0355654	0.0570306	0.0459539	0.198764	0.0320311
9480	ONECUT2	0.362879	0.141898	2.55732	0.0105481	0.321062	55.8335	9.05664	0.0596991	2.1621	-0.935948	1.83849	2.12577	3.69831	0.476834	-0.227399	0.639591	0.324512	0.608161	0.0486388	0.0590301	0.121026	0.0233039	0.0270415
1803	DPP4	-0.273444	0.106868	-2.55871	0.010506	0.321062	3.13007	4.12925	0.388796	0.59902	-0.47381	-1.60017	-2.20705	-1.72327	0.148343	-0.1508	-0.430273	-0.411244	-0.36697	0.0613269	0.101297	0.0723031	0.0347195	0.0453478
221424	LRRC73	0.237414	0.092573	2.56461	0.0103291	0.321062	3.27077	4.13525	0.38801	-0.148633	1.53218	0.173565	2.84327	0.793173	-0.032583	0.375964	0.0473396	0.429867	0.152644	0.0480567	0.0602104	0.0743917	0.0228576	0.0370357
1616	DAXX	0.240364	0.0938814	2.56029	0.0104584	0.321062	9.06768	4.39888	0.354707	0.725763	2.54647	1.98459	-0.231085	0.90307	0.160418	0.653528	0.291442	-0.0588519	0.164265	0.0488559	0.0658644	0.0215655	0.0648599	0.0330861
4345	CD200	0.301131	0.1177	2.55847	0.0105133	0.321062	35.3434	6.18653	0.185644	1.46622	0.0746032	2.80299	0.691504	2.24409	0.292537	0.016201	0.661207	0.119465	0.55494	0.0398075	0.0471592	0.0556457	0.0298461	0.0611523
343	AQP8	0.235747	0.0920889	2.55999	0.0104675	0.321062	7.66855	4.33222	0.362908	2.15085	2.23042	1.20444	0.390052	0.302354	0.456334	0.464532	0.284567	0.0613851	0.0602491	0.045014	0.0433767	0.0558206	0.0247674	0.0397074
161176	SYNE3	0.250043	0.097728	2.55857	0.0105105	0.321062	0	3.45347	0.484989	-0.306849	0.844339	0.25831	1.5123	2.61513	-0.0813151	0.230185	0.0882386	0.238512	0.492136	0.0702252	0.0743225	0.11669	0.0248741	0.0354148
192111	PGAM5	0.230614	0.0902131	2.55633	0.0105784	0.321062	0	0.498004	0.973695	1.34479	0.942567	1.41801	0.919452	1.21646	0.254828	0.188791	0.369988	0.163256	0.249923	0.0359076	0.040118	0.0680793	0.0315269	0.0422104
4948	OCA2	0.242317	0.0948157	2.55566	0.0105987	0.321062	0	1.98959	0.737673	0.215676	1.07004	1.00366	1.16378	2.22885	0.0437737	0.256388	0.308232	0.205903	0.429011	0.0411929	0.0574109	0.094316	0.0313027	0.0370488
10276	NET1	-0.315075	0.123121	-2.55906	0.0104955	0.321062	0	0.665598	0.955503	-1.48489	-0.776721	-0.754245	-1.06824	-1.64201	-0.41818	-0.271135	-0.192816	-0.262793	-0.44978	0.0793121	0.121854	0.0653525	0.0605188	0.0750328
11156	PTP4A3	0.276868	0.108067	2.56199	0.0104074	0.321062	0	3.35133	0.500841	0.802146	1.72089	1.75447	-0.399387	1.75288	0.195497	0.512314	0.371752	-0.103362	0.389003	0.0593982	0.0886273	0.0448969	0.0669782	0.0492494
27039	PKD2L2	0.318386	0.124549	2.55631	0.010579	0.321062	49.5696	7.93172	0.0941116	0.295573	3.49384	1.6383	1.96535	0.744454	0.0737104	0.849859	0.384276	0.314986	0.105437	0.0621913	0.0591681	0.0550172	0.0256862	0.020059
51375	SNX7	0.251414	0.0983617	2.55602	0.0105877	0.321062	38.0785	6.45979	0.167341	0.158259	0.857122	0.982667	1.55798	3.67136	0.026581	0.158671	0.204326	0.240501	0.583478	0.0282101	0.0342695	0.043235	0.0238292	0.0252577
8737	RIPK1	-0.227911	0.0888775	-2.56433	0.0103376	0.321062	0	3.91615	0.417473	-1.7182	0.799148	-2.13099	-0.685838	-1.37463	-0.304741	0.189097	-0.346293	-0.180402	-0.277017	0.0314567	0.0559905	0.0264075	0.0691891	0.040611
135935	NOBOX	-0.222656	0.0870793	-2.55694	0.0105598	0.321062	0	3.85852	0.425492	0.627622	-1.179	-1.64087	-1.07557	-2.18247	0.139679	-0.297153	-0.30827	-0.180405	-0.385405	0.0495301	0.0635236	0.0352951	0.0281331	0.0311843
51495	HACD3	-0.277943	0.108858	-2.55326	0.0106718	0.321319	0	2.95773	0.564924	-1.38929	-0.896761	-2.39169	-0.999063	0.155829	-0.350364	-0.280143	-0.490432	-0.245042	0.0367167	0.063599	0.0975902	0.0420485	0.060158	0.0555175
64207	IRF2BPL	-0.414006	0.162126	-2.55361	0.0106613	0.321319	52.0526	8.34247	0.0798087	-0.236712	-1.02599	-1.92824	-0.583681	-4.65349	-0.0616381	-0.319636	-0.374539	-0.207932	-0.894147	0.0678048	0.0970571	0.0377287	0.126909	0.0369198
2491	CENPI	-0.242501	0.0949624	-2.55365	0.01066	0.321319	14.5376	4.68042	0.321687	-0.888877	-3.26672	-0.285184	-0.813751	-0.653563	-0.156573	-0.566242	-0.0908168	-0.121963	-0.169098	0.0310277	0.0300456	0.10141	0.0224634	0.0669428
90843	TCEAL8	-0.251696	0.09867	-2.55088	0.0107451	0.322103	4.71307	4.19785	0.379892	-1.25678	0.403871	-2.78136	-0.965963	-0.865568	-0.263315	0.0911177	-0.491268	-0.246857	-0.201599	0.0438966	0.0509003	0.0311978	0.0653084	0.0542466
148014	TTC9B	0.235882	0.0924914	2.55031	0.0107627	0.322103	0	2.42662	0.657822	0.321448	1.87774	0.415291	0.645464	2.1708	0.0774524	0.418035	0.132116	0.108042	0.372716	0.0580562	0.0495629	0.101206	0.0280184	0.029479
219287	AMER2	0.259604	0.101739	2.55167	0.0107207	0.322103	27.096	5.48667	0.240904	2.22494	-0.702717	0.625938	2.08647	2.27282	0.401206	-0.139675	0.211375	0.320336	0.404828	0.0325159	0.0395074	0.114037	0.0235715	0.0317257
7140	TNNT3	0.272239	0.106863	2.54755	0.0108481	0.323361	0	0.556901	0.96773	0.760978	1.58876	0.631818	1.24067	1.41606	0.204489	0.446436	0.193245	0.238164	0.293816	0.0722097	0.0789591	0.0935474	0.0368501	0.0430513
6924	ELOA	-0.223538	0.0877451	-2.54758	0.0108473	0.323361	0	2.42522	0.658074	-0.772056	-0.653544	-2.70923	-0.480914	-0.566537	-0.161133	-0.147581	-0.42159	-0.101888	-0.116274	0.0435582	0.0509933	0.0242152	0.0448862	0.0421223
1642	DDB1	-0.288346	0.113277	-2.54549	0.0109125	0.324629	0	0.515346	0.97199	-1.20446	-0.644697	-1.11208	-0.891602	-1.75979	-0.253956	-0.167249	-0.287893	-0.352248	-0.401085	0.0444563	0.0672998	0.0670184	0.156083	0.0519461
26493	OR8B8	0.216556	0.0851044	2.54459	0.0109406	0.324818	0	2.32341	0.67651	1.37553	1.65312	1.15682	1.54819	-0.662074	0.253364	0.28479	0.250761	0.24265	-0.184274	0.0339272	0.0296785	0.0469883	0.0245646	0.0774668
221914	GPC2	-0.379451	0.149232	-2.54268	0.0110005	0.324969	51.7679	8.29323	0.0814083	-1.28217	0.0260954	-4.28897	-0.548301	-2.17052	-0.370947	0.00851391	-0.786422	-0.107786	-0.457955	0.0837011	0.106446	0.0336205	0.0386444	0.0445162
6217	RPS16	-0.226274	0.0891204	-2.53897	0.011118	0.324969	0	0.313089	0.988954	-1.15674	-1.61951	-0.984909	-0.849376	-1.0522	-0.198922	-0.292093	-0.18009	-0.342861	-0.209176	0.029573	0.0325295	0.0334338	0.162943	0.0395214
54908	SPDL1	-0.249181	0.0980959	-2.54018	0.0110797	0.324969	4.0266	4.16782	0.38377	0.593624	-1.14259	-2.69524	-1.27618	-0.704212	0.164705	-0.332529	-0.478255	-0.22435	-0.156417	0.0769822	0.0846993	0.0314864	0.030905	0.0493359
2488	FSHB	0.209952	0.082641	2.54053	0.0110684	0.324969	0	3.79415	0.43458	1.71877	1.13284	-0.748886	0.81698	2.18693	0.287367	0.231406	-0.204234	0.127755	0.38454	0.0279536	0.0417266	0.0743747	0.0244529	0.0309181
124602	KIF19	0.370916	0.146093	2.5389	0.0111201	0.324969	54.1229	8.71894	0.0685216	2.99897	2.632	1.00628	1.98892	-0.240038	0.648865	0.70621	0.328073	0.347259	-0.0417306	0.0468129	0.0719941	0.106292	0.0304841	0.0302238
9023	CH25H	-0.252136	0.0992439	-2.54057	0.0110673	0.324969	0	2.84687	0.583769	-2.30728	-1.4643	0.00788247	-0.155577	-1.34512	-0.453249	-0.34932	0.00332127	-0.0306563	-0.260529	0.03859	0.0569095	0.177535	0.0388282	0.0375134
80162	PGGHG	0.350184	0.137856	2.54022	0.0110782	0.324969	0	3.88389	0.421948	1.06647	1.22377	0.503788	-0.352149	2.70626	0.289991	0.363451	0.172004	-0.142345	0.74888	0.0739385	0.0882044	0.116568	0.163392	0.0765749
404037	HAPLN4	0.275917	0.108647	2.53958	0.0110984	0.324969	11.4194	4.51566	0.340695	0.82771	0.16958	-0.301216	3.12441	1.44884	0.21473	0.0450825	-0.0874525	0.51648	0.317603	0.0673019	0.0706755	0.0842924	0.0273258	0.048054
57718	PPP4R4	0.196386	0.0774283	2.53635	0.0112013	0.326064	0	2.79802	0.592175	0.470278	2.30701	-0.157933	1.76645	0.736469	0.0778836	0.375097	-0.0516267	0.270954	0.115507	0.0274272	0.0264356	0.106857	0.0235281	0.0245983
6917	TCEA1	-0.258466	0.1019	-2.53646	0.0111978	0.326064	0	3.5326	0.472938	0.165309	-0.872365	-0.375686	-2.21247	-2.03513	0.0493414	-0.342704	-0.0738407	-0.531955	-0.341967	0.0890906	0.154327	0.0386315	0.0578091	0.0282349
550	AUP1	0.231694	0.0914121	2.5346	0.0112574	0.326925	0	3.08549	0.543623	0.325791	-0.0079337	2.47562	0.331161	1.77908	0.0731036	-0.00241708	0.404047	0.0696043	0.331167	0.05035	0.0928172	0.0266376	0.0441768	0.0346501
64333	ARHGAP9	0.278693	0.109979	2.53406	0.0112748	0.326925	0	2.48736	0.646901	1.67134	0.332272	1.28106	-0.333558	2.06221	0.319785	0.0797936	0.444268	-0.13638	0.423387	0.036609	0.0576701	0.120269	0.16717	0.0421512
7840	ALMS1	-0.299696	0.118401	-2.53119	0.0113676	0.328977	34.5123	6.10802	0.191225	-0.5276	0.488701	-1.23103	-2.0342	-3.41714	-0.128	0.138332	-0.260728	-0.370614	-0.616971	0.0588587	0.0801229	0.0448577	0.0331938	0.0325989
10490	VTI1B	-0.286673	0.113407	-2.52782	0.0114772	0.329177	14.1677	4.66025	0.323967	-0.188021	0.323585	-2.25682	-0.694442	-2.69317	-0.0476478	0.108732	-0.366489	-0.193029	-0.610257	0.0642205	0.112911	0.0263712	0.0772635	0.0513448
1810	DR1	-0.334878	0.132409	-2.52911	0.0114353	0.329177	35.8149	6.23198	0.182481	0.63507	-0.580211	-2.2135	-1.36566	-3.41236	0.165552	-0.196972	-0.41002	-0.403282	-0.598136	0.067956	0.115248	0.0343124	0.087203	0.0307249
26471	NUPR1	0.228925	0.0905704	2.52759	0.011485	0.329177	0	3.42727	0.489022	0.0528734	0.323764	2.29941	1.97721	0.715336	0.0109425	0.0860489	0.479308	0.332704	0.140101	0.0428307	0.0706371	0.0434506	0.0283146	0.0383584
6218	RPS17	-0.235586	0.0932019	-2.5277	0.0114814	0.329177	8.45686	4.36952	0.3583	-2.89668	-0.403989	0.0902737	-0.820613	-1.57797	-0.432035	-0.0660271	0.0204978	-0.337303	-0.337187	0.0222452	0.0267119	0.0515577	0.168952	0.0456609
25983	NGDN	-0.222667	0.0880184	-2.52977	0.0114136	0.329177	0	3.03047	0.55274	-0.973543	-0.103558	-2.71883	-0.990209	-0.314936	-0.169851	-0.0235363	-0.427586	-0.244669	-0.070324	0.0304387	0.0516548	0.0247335	0.0610526	0.0498611
6299	SALL1	0.233888	0.0926943	2.52322	0.0116286	0.329917	0	3.31355	0.506788	-0.207111	0.743986	2.28528	1.71096	0.966377	-0.04756	0.1772	0.529292	0.283433	0.194404	0.0527321	0.0567282	0.0536428	0.0274423	0.0404686
6390	SDHB	-0.240281	0.0952947	-2.52145	0.0116871	0.329917	0	3.61141	0.461142	-2.81309	-0.63438	0.400281	-0.798164	-0.925168	-0.451323	-0.122349	0.123425	-0.292142	-0.180053	0.0257399	0.0371962	0.0950769	0.133969	0.0378756
8567	MADD	-0.211724	0.0839002	-2.52353	0.0116184	0.329917	12.5861	4.57593	0.333639	-1.48976	-0.668875	-2.68485	-1.42575	0.531913	-0.213667	-0.126387	-0.415227	-0.301216	0.108564	0.0205704	0.0357038	0.0239183	0.0446341	0.041657
10160	FARP1	-0.285201	0.113033	-2.52317	0.0116301	0.329917	50.1571	8.02521	0.090659	-3.05224	-1.94865	-2.12629	0.319295	-1.25513	-0.518716	-0.407268	-0.499823	0.0504607	-0.179937	0.0288816	0.0436813	0.055257	0.0249759	0.0205526
4985	OPRD1	0.235782	0.0934341	2.52351	0.011619	0.329917	0	3.46997	0.482459	0.0399893	-0.523088	0.94682	2.32486	1.80594	0.0101787	-0.153333	0.293795	0.381307	0.285847	0.0647883	0.085925	0.0962841	0.0269003	0.0250531
401562	LCNL1	0.250325	0.0991076	2.5258	0.0115437	0.329917	0	3.59051	0.46425	1.29876	2.42316	-0.31736	1.03557	1.1129	0.307781	0.675539	-0.122591	0.170962	0.211288	0.0561602	0.0777204	0.149216	0.0272548	0.0360441
10487	CAP1	0.226244	0.0897028	2.52216	0.0116638	0.329917	0	3.82068	0.430817	0.905057	1.43889	2.65587	-0.406867	0.270609	0.144783	0.289715	0.473954	-0.183618	0.0549839	0.0255908	0.0405401	0.0318463	0.20367	0.0412844
8749	ADAM18	0.291781	0.115721	2.52143	0.0116879	0.329917	25.3272	5.3567	0.252616	0.563931	-0.120009	1.90113	3.05164	1.22968	0.123444	-0.0280457	0.677349	0.510329	0.261806	0.0479169	0.0546147	0.126941	0.0279662	0.0453287
60682	SMAP1	-0.298358	0.118421	-2.51947	0.0117532	0.331133	33.584	6.02264	0.197464	-0.848975	-1.6227	-0.516761	-0.370629	-3.55031	-0.186004	-0.456422	-0.098762	-0.0866396	-0.634668	0.0480016	0.0791148	0.0365259	0.0546456	0.0319565
80122	MAP3K19	0.217031	0.0862048	2.51762	0.0118151	0.331864	6.58964	4.28218	0.369162	1.51402	1.36537	2.30274	1.23743	-0.216691	0.25667	0.250624	0.640428	0.19594	-0.0410114	0.0287399	0.0336936	0.0773483	0.0250728	0.03582
286527	TMSB15B	-0.236122	0.0937975	-2.51736	0.0118237	0.331864	0	2.46055	0.651714	-1.61649	-0.573693	-2.2402	-0.686014	-0.605321	-0.35315	-0.160996	-0.482251	-0.115821	-0.125265	0.0477281	0.0787539	0.0463419	0.028504	0.0428241
286527		-0.236122	0.0937975	-2.51736	0.0118237	0.331864	0	2.46055	0.651714	-1.61649	-0.573693	-2.2402	-0.686014	-0.605321	-0.35315	-0.160996	-0.482251	-0.115821	-0.125265	0.0477281	0.0787539	0.0463419	0.028504	0.0428241
286527	TMSB15A	-0.236122	0.0937975	-2.51736	0.0118237	0.331864	0	2.46055	0.651714	-1.61649	-0.573693	-2.2402	-0.686014	-0.605321	-0.35315	-0.160996	-0.482251	-0.115821	-0.125265	0.0477281	0.0787539	0.0463419	0.028504	0.0428241
11230	PRAF2	-0.309082	0.122913	-2.51464	0.0119155	0.333814	35.8099	6.23149	0.182515	0.44924	0.0666647	-3.01962	-1.51982	-2.65173	0.125745	0.0208712	-0.549235	-0.288569	-0.502917	0.0783478	0.0980175	0.0330835	0.0360508	0.0359693
1263	PLK3	0.271504	0.108053	2.5127	0.0119812	0.335025	0	2.93443	0.568858	2.12363	-0.169566	0.321642	1.07192	1.85931	0.57306	-0.0571635	0.0954785	0.205416	0.375337	0.0728186	0.113648	0.0881183	0.0367237	0.0407508
10016	PDCD6	-0.234997	0.0935793	-2.51121	0.0120319	0.335233	0	0.533271	0.970182	-1.50945	-1.54287	-1.09165	-0.82217	-0.559349	-0.28033	-0.320981	-0.174644	-0.297154	-0.142681	0.0344906	0.0432811	0.0255943	0.130629	0.0650678
79853	TM4SF20	0.217997	0.0868116	2.51116	0.0120336	0.335233	3.34384	4.13838	0.387602	0.855805	2.56017	1.33755	-0.0786062	1.24586	0.157342	0.483484	0.325109	-0.0133639	0.23384	0.0338016	0.0356637	0.0590798	0.0289034	0.0352288
57549	IGSF9	-0.257225	0.102544	-2.50845	0.0121263	0.335957	21.9627	5.12575	0.274636	-0.508248	-1.56351	-2.28838	-0.167308	-2.19533	-0.0996114	-0.324696	-0.659563	-0.0286451	-0.407023	0.0384119	0.0431273	0.0830722	0.0293134	0.0343746
6156	RPL30	-0.289307	0.115334	-2.50842	0.0121273	0.335957	17.7265	4.86183	0.30177	-2.4139	0.789031	-1.81093	-0.768823	-1.69218	-0.490999	0.201766	-0.343142	-0.346321	-0.355067	0.0413735	0.0653896	0.0359041	0.202911	0.0440276
130827	TMEM182	-0.209529	0.0835169	-2.50882	0.0121136	0.335957	0	1.32228	0.857585	-0.843562	-1.54737	0.0373795	-0.996599	-1.87507	-0.14965	-0.310274	0.0106025	-0.170358	-0.296216	0.0314718	0.0402071	0.0804549	0.0292203	0.0249564
64753	CCDC136	-0.256113	0.102278	-2.50409	0.0122766	0.336398	0	2.43844	0.655691	-0.565161	-0.339925	-2.22797	-0.657229	-1.69652	-0.164348	-0.100966	-0.485753	-0.116003	-0.386185	0.0845641	0.0882232	0.047535	0.0311534	0.0518172
26003	GORASP2	-0.223792	0.0893177	-2.50557	0.0122253	0.336398	0	0.815912	0.936302	-1.29739	-1.48606	-0.509093	-0.834788	-1.49871	-0.246896	-0.318751	-0.091158	-0.231757	-0.265612	0.0362146	0.0460073	0.0320623	0.0770748	0.0314093
84833	ATP5MD	-0.309792	0.123622	-2.50596	0.012212	0.336398	15.3873	4.72742	0.316426	1.10306	-1.02107	-2.63851	-1.08702	-1.71296	0.452583	-0.479883	-0.465895	-0.222702	-0.416709	0.168344	0.220881	0.0311786	0.0419729	0.0591798
7155	TOP2B	-0.301467	0.120236	-2.50729	0.0121659	0.336398	33.5689	6.02128	0.197565	-0.310101	-0.656856	-3.77404	-1.26121	-0.956234	-0.0557455	-0.15345	-0.596917	-0.470267	-0.233142	0.0323157	0.0545749	0.0250158	0.139033	0.0594446
155465	AGR3	0.246054	0.0982745	2.50374	0.0122888	0.336398	20.3253	5.02041	0.28521	0.356981	1.7933	-1.09299	2.79538	1.36358	0.0801713	0.385482	-0.53852	0.421261	0.188125	0.050437	0.0462064	0.242756	0.0227102	0.019034
23743	BHMT2	0.213976	0.0854745	2.50338	0.0123012	0.336398	0	1.13203	0.889158	0.923634	1.23592	-0.227607	1.74687	1.38384	0.16308	0.210639	-0.0766843	0.28958	0.275822	0.0311748	0.0290469	0.113512	0.0274799	0.0397272
317649	EIF4E3	0.287323	0.11472	2.50456	0.0122603	0.336398	0	1.36983	0.849422	1.24033	0.92559	1.79111	-0.140508	1.42117	0.299213	0.252911	0.436903	-0.0481678	0.317058	0.0581954	0.0746615	0.0595013	0.11752	0.0497723
2149	F2R	-0.230985	0.0923241	-2.50189	0.0123531	0.337198	0	2.76494	0.597899	-2.25482	-1.38565	0.768724	-0.583998	-1.04315	-0.323477	-0.230524	0.234904	-0.219393	-0.271113	0.0205807	0.0276772	0.0933768	0.141131	0.0675472
10939	AFG3L2	-0.266979	0.106762	-2.5007	0.0123948	0.337719	30.6835	5.77063	0.216945	-0.202281	-0.479099	-3.43043	-1.07237	-1.48727	-0.0345475	-0.104878	-0.572026	-0.285585	-0.296338	0.0291692	0.0479203	0.0278058	0.0709217	0.0397002
121643	FOXN4	0.230532	0.0923216	2.49705	0.0125231	0.33918	0	3.89053	0.421024	1.62428	-0.199862	-0.131683	2.49181	1.10504	0.327657	-0.0388833	-0.045338	0.396125	0.258138	0.0406928	0.03785	0.11854	0.0252717	0.0545695
23604	DAPK2	0.475995	0.190591	2.49747	0.0125083	0.33918	61.0167	10.2608	0.0362565	0.285738	2.4519	3.13122	0.175836	2.79291	0.0794498	0.769235	0.967788	0.0370863	0.670645	0.0773127	0.0984265	0.0955287	0.0444846	0.0576595
54463	RETREG1	-0.37135	0.14874	-2.49664	0.0125377	0.33918	48.6642	7.79184	0.099508	-2.50161	-0.843202	-3.46497	-1.62353	0.587335	-0.558644	-0.265593	-0.664482	-0.406124	0.138664	0.0498692	0.0992131	0.0367763	0.0625743	0.0557386
55510	DDX43	0.266473	0.106735	2.49659	0.0125395	0.33918	0	2.20265	0.698544	1.04091	-0.272406	-0.111892	1.84629	1.96382	0.30281	-0.0868014	-0.0478938	0.320522	0.374659	0.0846277	0.101536	0.183215	0.0301381	0.0363972
1457	CSNK2A1	-0.237283	0.0950846	-2.4955	0.0125781	0.339256	0	1.54575	0.818507	-1.4874	-1.61419	-1.58757	-0.485652	-0.446142	-0.311772	-0.442797	-0.281523	-0.101972	-0.0995781	0.0439355	0.0752485	0.031446	0.044087	0.0498174
284338	PRR19	0.242546	0.0972042	2.49522	0.0125878	0.339256	0	2.00378	0.735064	0.287347	1.27986	-0.226779	2.06636	1.4792	0.0650676	0.294026	-0.0786067	0.348555	0.302466	0.0512762	0.0527772	0.120147	0.0284532	0.0418117
60437	CDH26	0.228724	0.0916935	2.49444	0.0126156	0.339393	0	1.60234	0.808371	1.02068	1.64799	-0.0638644	1.14969	1.65561	0.20701	0.413322	-0.0172743	0.192242	0.305879	0.041134	0.0629023	0.0731613	0.0279602	0.0341337
3385	ICAM3	0.26631	0.106831	2.49281	0.0126737	0.339729	0	3.16413	0.530743	0.0581985	1.60336	1.77777	-0.165908	1.90161	0.0124513	0.419574	0.471643	-0.0694242	0.340163	0.0457728	0.0684792	0.0703845	0.175102	0.0319986
57189	KIAA1147	-0.286773	0.115017	-2.49332	0.0126556	0.339729	15.1857	4.71618	0.317677	-2.22449	-0.457231	-2.27942	-1.40105	0.57999	-0.46279	-0.116498	-0.413447	-0.476349	0.153815	0.0432821	0.0649181	0.0328995	0.115596	0.0703326
57466	SCAF4	-0.214447	0.0861463	-2.48933	0.0127984	0.340612	0	2.73228	0.603578	0.422261	-1.0017	-1.927	-0.913115	-1.78892	0.0857021	-0.236181	-0.293583	-0.250961	-0.297476	0.0411928	0.0555919	0.0232114	0.0755371	0.0276517
50833	TAS2R16	0.223406	0.089768	2.4887	0.012821	0.340612	0	2.36484	0.668991	-0.025819	1.27202	0.434002	2.22559	1.34096	-0.00575809	0.333884	0.0942386	0.369088	0.237401	0.0497367	0.0688976	0.0471492	0.0275022	0.0313426
7127	TNFAIP2	0.318032	0.127758	2.48933	0.0127983	0.340612	6.61532	4.28336	0.369014	1.1095	2.03122	1.25824	-0.628487	1.91145	0.282606	0.586388	0.443677	-0.181984	0.443097	0.0648798	0.0833401	0.124338	0.0838443	0.053737
8065	CUL5	-0.248403	0.0997683	-2.4898	0.0127816	0.340612	10.9973	4.49425	0.34323	0.0853758	0.193206	-2.85128	-1.04835	-1.72167	0.0193491	0.0481849	-0.414457	-0.280239	-0.385417	0.0513634	0.0621989	0.021129	0.0714571	0.0501144
4172	MCM3	-0.277952	0.111607	-2.49046	0.0127579	0.340612	35.2904	6.18146	0.186	-0.89313	-0.329763	-1.37742	-0.778526	-3.55496	-0.151919	-0.0718626	-0.21971	-0.244669	-0.700112	0.028933	0.04749	0.0254431	0.098767	0.0387851
387758	FIBIN	0.235283	0.0946088	2.4869	0.0128861	0.340856	0	2.99006	0.55949	0.110594	1.70119	1.74145	0.871811	1.57345	0.0230042	0.382169	0.526488	0.14208	0.350071	0.0432662	0.0504665	0.0914014	0.0265597	0.0495001
5763	PTMS	0.356744	0.143491	2.48617	0.0129124	0.340856	24.5892	5.30428	0.257477	0.638866	1.73047	1.24308	-0.448874	3.0889	0.228974	0.605475	0.309529	-0.130442	0.636477	0.128456	0.122423	0.0620018	0.0844469	0.0424578
1961	EGR4	-0.24097	0.0968986	-2.48682	0.0128889	0.340856	0	3.90708	0.418727	-0.992292	0.503783	-0.333876	-1.50165	-2.54686	-0.215603	0.122109	-0.153182	-0.252411	-0.479973	0.0472096	0.0587503	0.210498	0.0282538	0.035516
23016	EXOSC7	-0.250395	0.100725	-2.48592	0.0129216	0.340856	22.3667	5.15243	0.272012	-1.71791	-0.0751604	-3.29784	-0.59122	-0.2606	-0.300122	-0.0169475	-0.522696	-0.157322	-0.0528415	0.0305207	0.0508432	0.0251211	0.070808	0.0411152
2354	FOSB	-0.415752	0.167596	-2.48068	0.0131133	0.345301	21.1081	5.07023	0.280167	-0.665194	0.412726	-1.22644	-0.31411	-3.99886	-0.233174	0.170919	-0.587547	-0.144733	-0.694428	0.122875	0.171497	0.229506	0.212309	0.0301565
9805	SCRN1	-0.301854	0.121819	-2.47788	0.0132165	0.346795	24.9712	5.33129	0.254962	-3.09897	-0.758295	-0.899438	-1.63017	0.0141242	-0.669059	-0.207767	-0.201769	-0.41722	0.00310985	0.0466117	0.075072	0.0503229	0.0655038	0.0484786
6645	SNTB2	-0.260127	0.10498	-2.47788	0.0132166	0.346795	0	2.68623	0.611626	-0.536867	-2.526	-0.901841	-0.509106	-1.04149	-0.126071	-0.611849	-0.199159	-0.155594	-0.211067	0.0551436	0.0586707	0.0487684	0.0934044	0.0410706
8383	OR1A1	0.231474	0.0934518	2.47693	0.0132517	0.347107	0	2.84687	0.583769	1.40378	1.34303	2.13818	0.646666	0.466592	0.292112	0.313401	0.582347	0.101644	0.106794	0.043301	0.0544535	0.0741778	0.0247058	0.052386
89958	SAPCD2	0.25558	0.103368	2.47254	0.0134158	0.350174	0	1.93582	0.747562	1.9282	0.0288882	0.993038	1.45862	1.10308	0.647636	0.0114001	0.315582	0.249447	0.188592	0.112813	0.155731	0.100993	0.0292466	0.0292301
83460	EMC6	-0.259551	0.104973	-2.47256	0.0134149	0.350174	0	2.49474	0.645578	-2.05373	-0.148579	-0.34094	-0.776409	-1.91033	-0.409842	-0.0370958	-0.0864182	-0.199453	-0.439655	0.039824	0.0623359	0.0642471	0.065993	0.0529673
10172	ZNF256	-0.255236	0.103294	-2.47096	0.0134751	0.350796	8.25115	4.35973	0.359506	-0.130846	-1.27058	-2.68366	-1.53841	0.171522	-0.0278281	-0.355041	-0.492436	-0.316429	0.0445889	0.0452322	0.078083	0.0336702	0.0423068	0.0675794
9310	ZNF235	-0.241085	0.0975939	-2.47028	0.0135006	0.350796	0	0.787219	0.940153	-1.208	-0.343294	-1.44546	-1.76324	-0.337712	-0.316376	-0.115148	-0.250892	-0.311311	-0.0837706	0.0685918	0.112508	0.0301274	0.0311722	0.0615303
2298	FOXD4	0.257557	0.104273	2.47003	0.0135102	0.350796	0	1.66023	0.797928	1.1343	1.57112	0.157933	1.98377	0.214281	0.292889	0.442576	0.0528907	0.318018	0.0526832	0.0666731	0.0793516	0.112154	0.0256992	0.0604471
3566	IL4R	0.296446	0.120202	2.46622	0.0136547	0.351145	14.6019	4.68395	0.32129	2.09649	-0.227823	1.59978	-0.445268	2.28651	0.452887	-0.0629577	0.3629	-0.16498	0.494621	0.0466655	0.0763665	0.0514583	0.137283	0.0467948
29093	MRPL22	-0.291172	0.118208	-2.46321	0.0137698	0.351145	40.453	6.71738	0.151599	-1.30191	-1.29041	-0.217181	-1.23593	-3.2253	-0.274517	-0.272762	-0.0306281	-0.354019	-0.678373	0.0444603	0.0446801	0.0198881	0.082048	0.0442381
23451	SF3B1	-0.243161	0.098745	-2.46252	0.0137965	0.351145	0	1.66365	0.79731	-0.731389	-1.37509	-2.0481	-0.601647	-0.863222	-0.153991	-0.408052	-0.430886	-0.186124	-0.144674	0.0443293	0.0880587	0.044261	0.0957023	0.0280889
57709	SLC7A14	0.233849	0.094767	2.46762	0.0136015	0.351145	3.35884	4.13902	0.387518	-0.155224	1.35298	0.758463	2.82546	0.367901	-0.0372036	0.29524	0.196903	0.473746	0.0709379	0.0574453	0.0476175	0.0673959	0.0281134	0.0371787
79974	CPED1	0.276968	0.112392	2.46431	0.0137278	0.351145	3.53178	4.14644	0.38655	0.788618	1.25184	2.25272	-0.323947	1.75351	0.247729	0.430989	0.482154	-0.0675962	0.400307	0.0986783	0.118531	0.0458096	0.0435407	0.0521157
253738	EBF3	0.293508	0.119208	2.46216	0.0138103	0.351145	31.6431	5.85164	0.210505	-0.237877	0.165897	1.12277	2.93445	2.52331	-0.0560272	0.0392691	0.348606	0.517754	0.468217	0.0554745	0.0560304	0.0964022	0.0311309	0.0344313
140465	MYL6B	-0.269889	0.109611	-2.46224	0.0138074	0.351145	21.4057	5.08943	0.278244	-0.711847	0.638725	-2.00342	-1.01691	-2.76159	-0.162783	0.165979	-0.394345	-0.240652	-0.505319	0.0522933	0.0675271	0.0387444	0.0560036	0.0334821
5330	PLCB2	0.28417	0.115233	2.46606	0.013661	0.351145	0	3.495	0.478639	0.94993	1.75332	0.217908	-0.22707	2.3454	0.247024	0.463748	0.0546411	-0.077187	0.503846	0.0676232	0.0699588	0.0628772	0.11555	0.046149
9776	ATG13	0.232227	0.0941836	2.46569	0.0136751	0.351145	0	3.80073	0.433645	1.88495	1.21183	1.68999	1.31002	-0.5353	0.492372	0.311686	0.304005	0.234867	-0.116963	0.0682318	0.0661531	0.0323587	0.0321433	0.0477421
50674	NEUROG3	0.261251	0.10588	2.46744	0.0136083	0.351145	27.4064	5.51013	0.238841	0.48929	2.80886	1.35131	1.96211	-0.0340971	0.111537	0.592475	0.346064	0.325353	-0.00593402	0.0519641	0.0444918	0.0655847	0.0274955	0.0302875
131096	KCNH8	0.272051	0.110442	2.4633	0.0137664	0.351145	31.1192	5.80713	0.214022	-0.0731492	2.74237	0.738728	0.853604	2.43444	-0.0173901	0.675482	0.161408	0.143468	0.430226	0.0565178	0.0606701	0.0477401	0.0282485	0.0312316
23287	AGTPBP1	-0.309761	0.125661	-2.46505	0.0136994	0.351145	0	1.07709	0.89789	-0.330084	0.0252862	-1.40263	-1.05173	-1.9926	-0.135339	0.0112486	-0.298002	-0.329999	-0.445387	0.168111	0.197893	0.0451391	0.0984497	0.0499615
26095	PTPN20	0.215717	0.0876311	2.46165	0.01383	0.351145	0	1.09064	0.895755	1.24673	0.558906	0.331488	1.18142	1.94371	0.264388	0.112756	0.103089	0.179431	0.356516	0.044972	0.0407005	0.0967142	0.0230668	0.0336429
26259	FBXW8	-0.291291	0.118502	-2.45811	0.0139671	0.353477	49.6421	7.94315	0.0936832	-2.13516	-0.743344	-3.81134	-0.859145	-0.197512	-0.364387	-0.142549	-0.724889	-0.153315	-0.0421135	0.0291251	0.0367748	0.0361734	0.0318448	0.0454628
5806	PTX3	0.26092	0.106149	2.45805	0.0139693	0.353477	1.20443	4.04876	0.399447	-0.133823	2.54394	0.577006	1.83301	0.187802	-0.0309983	0.585202	0.240037	0.301504	0.0591753	0.0536556	0.0529173	0.17306	0.0270555	0.0992839
84844	PHF5A	-0.230168	0.0936621	-2.45743	0.0139933	0.353485	11.8732	4.53892	0.337958	-1.0392	0.390277	-2.68032	-1.10063	-1.38954	-0.187671	0.0720152	-0.437043	-0.31692	-0.298567	0.032613	0.0340489	0.0265873	0.0829111	0.046168
89849	ATG16L2	0.285003	0.116094	2.45494	0.0140909	0.354149	0	3.64064	0.456818	1.39848	0.193228	0.586856	-0.216276	2.69872	0.331562	0.0557682	0.162954	-0.0766619	0.557038	0.0562099	0.0832977	0.0771017	0.125645	0.0426043
84675	TRIM55	0.253385	0.103195	2.4554	0.0140728	0.354149	33.8353	6.04552	0.195774	-0.216347	2.37709	1.04517	0.938215	2.6882	-0.036979	0.440666	0.276296	0.150642	0.496027	0.0292152	0.0343659	0.0698832	0.0257802	0.0340476
5368	PNOC	0.284811	0.115979	2.45571	0.0140607	0.354149	2.46765	4.1012	0.392483	0.260928	2.24308	1.46102	0.363767	1.69545	0.0762048	0.671949	0.515037	0.0694952	0.395243	0.0852951	0.0897396	0.12427	0.0364975	0.0543449
57711	ZNF529	-0.24123	0.0983986	-2.45156	0.0142238	0.356288	0	0.578537	0.965419	-1.70493	-0.610543	-1.40369	-0.970551	-0.629966	-0.352167	-0.146394	-0.256927	-0.243245	-0.154239	0.0426665	0.0574933	0.0335027	0.0628131	0.0599452
1213	CLTC	-0.257902	0.105179	-2.45204	0.0142048	0.356288	0	2.59366	0.627946	0.429928	-0.605516	-1.93152	-1.12524	-1.74864	0.133634	-0.197514	-0.439089	-0.210182	-0.367553	0.0966142	0.106401	0.0516781	0.0348896	0.0441815
25800	SLC39A6	-0.250992	0.102433	-2.4503	0.0142738	0.35694	0	2.50259	0.644172	0.181606	-1.14693	-1.98642	-0.918871	-1.53881	0.045822	-0.327744	-0.424472	-0.174975	-0.36398	0.0636632	0.0816574	0.045662	0.0362613	0.0559482
1660	DHX9	-0.222915	0.0911011	-2.4469	0.0144091	0.35702	0	1.87113	0.759446	-0.173507	-0.417923	-2.49145	-1.06931	-0.550411	-0.0475725	-0.184957	-0.379147	-0.188565	-0.106431	0.0751753	0.195862	0.0231585	0.0310969	0.0373907
2091	FBL	-0.225947	0.0922793	-2.44851	0.014345	0.35702	0	2.78755	0.593983	-2.33942	-0.143406	-1.54422	-0.86277	-0.400392	-0.474381	-0.0311088	-0.244309	-0.276872	-0.0849772	0.0411186	0.0470578	0.0250301	0.102983	0.0450437
79652	TMEM204	-0.434888	0.177769	-2.44636	0.0144307	0.35702	58.0351	9.53178	0.0490984	-2.36471	-0.184795	-4.04381	-2.00454	0.0492962	-0.623325	-0.0532903	-0.905449	-0.505441	0.0130984	0.0694818	0.0831605	0.0501357	0.0635787	0.0706011
146853	C17orf50	0.228577	0.0934715	2.44541	0.0144686	0.35702	0	2.67661	0.613313	0.163263	1.54943	-0.0715166	1.61591	1.90079	0.0342891	0.368488	-0.0198799	0.263061	0.392679	0.0441099	0.0565591	0.0772708	0.0265021	0.0426783
10425	ARIH2	-0.22905	0.0936146	-2.44673	0.0144157	0.35702	16.3789	4.78348	0.310243	-2.41227	0.735856	-1.45374	-0.971508	-1.70986	-0.418667	0.158107	-0.208803	-0.283415	-0.334132	0.0301222	0.0461655	0.0206299	0.0851047	0.0381873
545	ATR	-0.205394	0.0839248	-2.44735	0.0143909	0.35702	0	1.88023	0.757776	-1.49549	-1.84233	-1.2638	-0.336873	-0.726953	-0.305236	-0.381138	-0.225539	-0.0568062	-0.137279	0.0416589	0.0427988	0.0318484	0.0284353	0.0356613
28989	NTMT1	-0.228867	0.0935751	-2.44581	0.0144528	0.35702	0	2.54873	0.635932	-1.34837	-0.179997	-2.14753	0.00771586	-1.43815	-0.338433	-0.0504274	-0.346442	0.00155932	-0.301989	0.0629985	0.0784881	0.0260245	0.0408417	0.0440933
81566	CSRNP2	-0.224756	0.0918279	-2.44758	0.014382	0.35702	0	2.5437	0.636827	-1.32342	-0.422422	-2.43138	-0.773716	-0.306916	-0.290898	-0.121268	-0.435707	-0.151325	-0.0575136	0.0483153	0.0824137	0.032113	0.0382521	0.0351158
7472	WNT2	-0.239881	0.0982605	-2.44127	0.0146355	0.35978	0	3.15703	0.531899	-0.328614	-0.533414	-0.970679	-0.348013	-2.76785	-0.0813249	-0.157831	-0.351925	-0.063652	-0.447116	0.0612454	0.0875501	0.131446	0.0334528	0.0260949
3860	KRT13	-0.358108	0.146682	-2.44139	0.0146309	0.35978	24.3972	5.29081	0.258739	-1.07062	-1.07342	0.428611	-0.187215	-3.64794	-0.253914	-0.285695	0.200834	-0.083079	-0.714098	0.0562471	0.0708373	0.219558	0.196925	0.0383195
64780	MICAL1	0.292979	0.120032	2.44085	0.0146529	0.35978	14.7205	4.69046	0.320557	0.97183	1.33028	0.62679	-0.398364	2.97698	0.239085	0.380768	0.132527	-0.137317	0.613289	0.0605237	0.0819279	0.0447058	0.118821	0.0424404
3008	HIST1H1E	0.267532	0.109644	2.43999	0.0146875	0.360037	0	3.59081	0.464205	0.011048	0.0656245	0.995005	2.40383	1.66479	0.00300163	0.017364	0.241798	0.541808	0.384638	0.0738151	0.0700112	0.059055	0.0508023	0.0533809
55658	RNF126	-0.210399	0.086257	-2.43921	0.0147195	0.360228	0	1.61961	0.805263	-1.28058	-0.296679	-0.785254	-1.18593	-1.95407	-0.209829	-0.0677167	-0.13007	-0.270176	-0.414281	0.0268482	0.0520976	0.027437	0.051901	0.044948
140609	NEK7	-0.270871	0.111195	-2.43601	0.0148505	0.362838	0	1.40176	0.843889	0.372205	-0.53763	-1.14092	-1.60052	-1.74497	0.141883	-0.224394	-0.263839	-0.326583	-0.345298	0.145311	0.174203	0.0534766	0.0416354	0.0391572
253943	YTHDF3	-0.227097	0.0933313	-2.43324	0.0149644	0.363833	0	1.37191	0.849062	-0.275038	-0.364201	-2.00496	-1.08799	-1.37138	-0.0570676	-0.0981809	-0.326994	-0.272888	-0.278072	0.0430519	0.0726727	0.0265991	0.0629102	0.0411151
1774	DNASE1L1	0.220135	0.0904522	2.43372	0.0149445	0.363833	6.39476	4.27327	0.370285	1.29606	1.35154	2.36889	-0.611599	1.07829	0.222803	0.293771	0.449523	-0.13072	0.210604	0.0295524	0.0472454	0.0360091	0.0456824	0.0381472
405754	ERVFRD-1	0.241902	0.0993971	2.4337	0.0149455	0.363833	0	1.0847	0.896692	0.465349	1.47428	0.389131	1.83301	1.05175	0.111596	0.39808	0.101708	0.310736	0.231294	0.0575098	0.0729088	0.0683152	0.0287378	0.0483622
9436	NCR2	0.217658	0.0894888	2.43224	0.0150059	0.364247	0	3.56206	0.468505	2.2698	-0.151747	0.677619	1.91734	0.409255	0.463841	-0.0372884	0.19536	0.306932	0.0709093	0.0417604	0.0603817	0.0831187	0.0256264	0.0300205
284217	LAMA1	0.191053	0.0785739	2.4315	0.0150363	0.364391	0	2.50328	0.644049	2.2928	0.321324	0.641356	0.460819	1.55936	0.368026	0.0571638	0.217574	0.0711906	0.243609	0.0257646	0.0316488	0.115084	0.0238662	0.0244059
55243	KIRREL1	0.24547	0.101001	2.43038	0.0150831	0.364933	19.5172	4.97001	0.290389	1.03052	0.933796	-0.370514	3.03702	1.24643	0.269321	0.217924	-0.0756102	0.507533	0.221739	0.0683013	0.0544636	0.0416439	0.0279276	0.0316483
55657	ZNF692	0.402827	0.165792	2.42971	0.0151109	0.365013	65.0261	11.4371	0.0220669	0.64896	1.84569	2.66703	-0.23208	4.43711	0.123453	0.412087	0.717531	-0.0596138	0.788231	0.0361885	0.0498495	0.0723813	0.0659809	0.0315578
9775	EIF4A3	-0.259408	0.106931	-2.42593	0.0152692	0.368239	39.5198	6.61373	0.157764	-0.135498	-1.10874	-3.3132	-0.519716	-1.92333	-0.0192975	-0.17427	-0.543328	-0.187222	-0.402157	0.0202832	0.0247051	0.0268924	0.129772	0.0437204
204962	SLC44A5	0.262542	0.108252	2.42528	0.0152966	0.368304	22.3301	5.15	0.27225	-0.454524	1.4267	0.411737	2.17942	2.45608	-0.0942665	0.309864	0.121852	0.364446	0.53198	0.0430131	0.0471712	0.0875846	0.027963	0.0469141
57717	PCDHB16	0.204967	0.0845506	2.42419	0.0153427	0.368818	4.28191	4.17894	0.38233	1.93024	1.58528	1.02092	1.65704	-0.54449	0.347559	0.320753	0.26886	0.25372	-0.0925412	0.0324217	0.0409382	0.0693534	0.0234448	0.0288863
8748	ADAM20	-0.241429	0.0996274	-2.42332	0.0153795	0.369109	0	3.36077	0.499361	-1.91605	-1.04736	-1.80537	-1.06218	0.278303	-0.419068	-0.25662	-0.546934	-0.175459	0.0703625	0.0478363	0.0600329	0.0917775	0.0272872	0.0639215
26256	CABYR	0.220887	0.0911805	2.42252	0.0154131	0.369321	11.216	4.50531	0.341918	1.65868	-0.347258	2.09164	1.86149	0.69445	0.310428	-0.0697581	0.603783	0.283666	0.128002	0.0350265	0.0403537	0.083327	0.0232217	0.0339744
29889	GNL2	-0.218134	0.0901836	-2.41877	0.0155729	0.37255	0	3.60135	0.462636	-0.582533	-2.47641	-0.67642	-0.831127	-1.35334	-0.113758	-0.627978	-0.100666	-0.249913	-0.270832	0.0381349	0.0643046	0.0221479	0.0904157	0.0400484
51030	TVP23B	-0.253095	0.104702	-2.41729	0.0156367	0.372878	0	0.578973	0.965371	-0.434117	-0.93379	-1.7797	-1.36511	-0.575302	-0.122523	-0.326093	-0.311336	-0.289878	-0.145601	0.0796565	0.121951	0.0306032	0.0450913	0.0640524
23479	ISCU	-0.246502	0.101968	-2.41745	0.0156296	0.372878	0	0.724007	0.948336	-0.950698	-0.607655	-1.85249	-0.754584	-1.1375	-0.203005	-0.13963	-0.389811	-0.243541	-0.236554	0.0455959	0.0528007	0.0442791	0.104167	0.0432473
81706	PPP1R14C	-0.364474	0.151064	-2.41271	0.0158344	0.375735	39.9552	6.6617	0.154883	-1.10273	-0.189488	-0.344831	-0.932588	-4.33872	-0.296969	-0.0615205	-0.143557	-0.205708	-0.766684	0.0725246	0.105408	0.173315	0.0486547	0.0312255
143630	UBQLNL	0.346194	0.143508	2.41237	0.0158491	0.375735	38.5628	6.51071	0.164117	-0.303729	0.889101	1.40566	1.19066	3.62352	-0.0933802	0.314142	0.359129	0.221432	0.774915	0.0945231	0.124839	0.0652742	0.0345864	0.0457347
6605	SMARCE1	-0.221795	0.0919582	-2.41191	0.0158693	0.375735	0	1.97158	0.740987	0.225313	-1.13281	-1.88417	-1.0554	-1.33825	0.0488533	-0.299181	-0.30613	-0.276912	-0.243359	0.0470125	0.069752	0.0263981	0.0688412	0.0330691
4758	NEU1	0.242687	0.100633	2.4116	0.0158825	0.375735	28.7035	5.61037	0.230197	0.786067	1.11585	3.3213	-0.787008	1.47899	0.140814	0.238867	0.477429	-0.22546	0.261823	0.03209	0.0458252	0.0206634	0.082069	0.031339
126382	NR2C2AP	-0.257222	0.106573	-2.41358	0.0157965	0.375735	0	1.28759	0.863478	-2.03641	-0.305605	-0.626746	-1.22622	-0.988016	-0.474977	-0.0932788	-0.176677	-0.246475	-0.21261	0.0544019	0.0931634	0.0794654	0.0404025	0.0463063
51270	TFDP3	0.355666	0.147594	2.40976	0.0159629	0.376442	55.9167	9.07374	0.0592825	0.201138	4.10211	1.33319	2.09985	0.472569	0.0442413	0.890529	0.375193	0.335067	0.114997	0.0483799	0.0471282	0.0791997	0.0254617	0.0592166
3658	IREB2	-0.218572	0.0906979	-2.40989	0.0159572	0.376442	0	3.48933	0.479503	-0.784397	-2.35531	-1.62673	-0.693162	-0.0862296	-0.176185	-0.592171	-0.255907	-0.164844	-0.0163445	0.0504507	0.0632117	0.0247478	0.056556	0.0359278
6792	CDKL5	0.193099	0.0802558	2.40605	0.0161262	0.379692	0	1.79511	0.773377	0.492086	1.81902	0.480983	1.37342	1.38403	0.0776921	0.362297	0.0963206	0.201796	0.320292	0.024927	0.0396692	0.0401033	0.0215881	0.053555
998	CDC42	-0.196437	0.0817576	-2.40268	0.0162756	0.380582	0	2.30395	0.680049	-1.33537	-1.87184	0.242857	-0.612559	-1.53479	-0.22929	-0.36009	0.0483307	-0.168412	-0.216653	0.0294826	0.037007	0.0396045	0.0755876	0.0199265
25817	FAM19A5	-0.217708	0.0907322	-2.39946	0.0164194	0.380582	0	3.36152	0.499245	-1.78682	0.315519	-0.995299	-0.743067	-2.06975	-0.372691	0.0677647	-0.296603	-0.128228	-0.366079	0.0435048	0.0461271	0.0888063	0.0297789	0.0312834
55248	TMEM206	0.222033	0.0923851	2.40334	0.0162459	0.380582	4.91149	4.20661	0.378766	1.93997	-0.258071	1.1097	2.28899	0.239739	0.394442	-0.0563231	0.283699	0.384429	0.0454447	0.0413408	0.0476317	0.0653592	0.0282062	0.0359327
10594	PRPF8	-0.235003	0.097881	-2.40091	0.0163544	0.380582	0	2.98461	0.560405	-0.476763	-2.40836	0.276046	-0.864449	-1.37768	-0.0929433	-0.422128	0.0778901	-0.312324	-0.273938	0.0380041	0.0307217	0.0796164	0.130536	0.0395376
4901	NRL	0.300595	0.125027	2.40424	0.0162061	0.380582	38.7459	6.53018	0.162899	1.3969	2.74986	-0.529964	2.77419	0.327782	0.309744	0.628879	-0.166907	0.463861	0.0662855	0.0491667	0.0523012	0.099187	0.0279577	0.0408947
8927	BSN	0.254047	0.10586	2.39984	0.0164023	0.380582	12.5794	4.57558	0.333679	0.681332	2.26971	-0.436283	1.05138	2.08221	0.153233	0.587824	-0.139228	0.164591	0.460052	0.0505811	0.0670742	0.101839	0.024507	0.0488165
55589	BMP2K	-0.269669	0.112333	-2.40063	0.0163667	0.380582	0.491268	4.01975	0.40334	0.0125633	-0.258099	-1.66174	-1.3381	-2.27812	0.00263768	-0.0720964	-0.435838	-0.404545	-0.526886	0.0440798	0.0780288	0.0687898	0.0914021	0.0534908
127731	VWA5B1	0.226995	0.0945637	2.40045	0.016375	0.380582	9.78641	4.43392	0.350455	-0.0840372	1.02749	2.81456	0.87048	1.03974	-0.0203858	0.232524	0.60655	0.145337	0.186059	0.0588455	0.0512128	0.0464422	0.0278763	0.0320221
83544	DNAL1	0.211373	0.0880528	2.40053	0.0163716	0.380582	0	2.26252	0.687601	1.09027	1.24781	2.03087	0.255884	1.04374	0.236466	0.313528	0.39405	0.0400597	0.210798	0.0470401	0.0631324	0.0376476	0.0245093	0.0407892
4649	MYO9A	-0.289348	0.120432	-2.40259	0.0162794	0.380582	39.8745	6.65276	0.155416	-0.250722	0.107358	-3.50171	-1.12317	-2.09602	-0.0509298	0.0268739	-0.582543	-0.248384	-0.45675	0.0412629	0.0626608	0.0276755	0.0489051	0.0474862
5802	PTPRS	-0.209211	0.0877097	-2.38527	0.0170667	0.380771	0	1.6944	0.791734	-0.464991	-0.702516	-1.90364	-0.782188	-1.56157	-0.095852	-0.144579	-0.424374	-0.135611	-0.287732	0.0424927	0.0423546	0.0496969	0.0300584	0.033951
84146	ZNF644	-0.214374	0.0898304	-2.38643	0.0170127	0.380771	9.20257	4.40541	0.353911	-0.280541	-2.87153	-1.00337	-0.667522	-0.927	-0.0590219	-0.612746	-0.151224	-0.129593	-0.194491	0.0442621	0.0455338	0.0227154	0.0376904	0.0440189
9170	LPAR2	0.280256	0.117613	2.38286	0.0171785	0.380771	0	2.92383	0.570652	2.25023	1.32763	1.15449	-0.350355	0.56582	0.542113	0.345608	0.299061	-0.123489	0.135826	0.0580399	0.0677664	0.0671024	0.124233	0.0576249
154215	NKAIN2	-0.353337	0.147827	-2.39021	0.0168386	0.380771	57.4649	9.40401	0.0517575	-3.83455	-0.328243	-0.953295	-0.263873	-2.87759	-0.760105	-0.0809331	-0.285649	-0.0470824	-0.538776	0.0392933	0.0607942	0.0897862	0.0318366	0.0350557
203547	VMA21	-0.20432	0.0853705	-2.39333	0.0166962	0.380771	4.08166	4.17021	0.38346	-0.323474	-0.361221	-2.55006	-1.43937	-1.14053	-0.048389	-0.0648621	-0.440444	-0.43964	-0.231737	0.0223776	0.0322431	0.0298319	0.0932938	0.0412841
6599	SMARCC1	-0.215021	0.0902453	-2.38263	0.0171895	0.380771	8.94019	4.39272	0.355459	-0.500047	0.289765	-2.79433	-1.05348	-1.28513	-0.0827474	0.0627865	-0.427398	-0.346335	-0.244037	0.0273834	0.0469507	0.0233944	0.108079	0.0360595
80790	CMIP	-0.38217	0.159928	-2.38964	0.0168648	0.380771	63.2916	10.8967	0.02775	-2.56897	-4.24065	-1.70934	-0.840225	0.412464	-0.475981	-0.792314	-0.39451	-0.27873	0.0794977	0.034329	0.0349084	0.0532674	0.110046	0.0371481
158763	ARHGAP36	-0.22752	0.0952016	-2.38988	0.0168538	0.380771	0	3.72414	0.444625	0.228107	-0.653544	-1.70402	-2.3726	-0.650849	0.0543845	-0.184075	-0.558145	-0.378107	-0.116074	0.0568426	0.07933	0.107286	0.0253969	0.0318058
29098	RANGRF	0.215176	0.0899389	2.39246	0.0167357	0.380771	0	2.64283	0.619255	0.141573	0.701818	2.64088	0.917988	0.192743	0.0387932	0.20898	0.402062	0.152466	0.0434992	0.0750844	0.0886664	0.0231786	0.027585	0.0509338
29922	NME7	-0.224826	0.0937841	-2.39727	0.0165177	0.380771	0	0.44756	0.978401	-0.63258	-1.29489	-0.795385	-1.16435	-1.45919	-0.14861	-0.328794	-0.175067	-0.200265	-0.288277	0.0551905	0.0644735	0.0484456	0.0295833	0.03903
7879	RAB7A	0.222615	0.0930266	2.39302	0.0167102	0.380771	15.6544	4.7424	0.314765	2.26657	-0.23159	2.4148	-0.287759	1.03733	0.335027	-0.042948	0.427551	-0.110037	0.194537	0.0218484	0.034391	0.0313481	0.146224	0.0351698
2108	ETFA	-0.232489	0.0972582	-2.39043	0.0168288	0.380771	0	3.93161	0.41534	-1.52026	-0.458127	0.257265	-1.31636	-2.30775	-0.312757	-0.113524	0.0500064	-0.421939	-0.424141	0.0423233	0.0614052	0.0377825	0.102742	0.0337788
79811	SLTM	-0.265221	0.110778	-2.39416	0.0166585	0.380771	0	1.74047	0.783353	-0.347382	-1.53177	-0.6346	-0.881926	-1.95575	-0.0816997	-0.444454	-0.150409	-0.255468	-0.418764	0.0553131	0.0841909	0.0561756	0.0839088	0.0458471
116138	KLHDC3	-0.232086	0.0973285	-2.38456	0.0170995	0.380771	0	2.52566	0.640046	-0.889659	-2.26099	-0.0371354	-1.12163	-1.02412	-0.172494	-0.460296	-0.00826364	-0.352761	-0.206768	0.0375927	0.0414456	0.0495185	0.0989147	0.0407633
126014	OSCAR	0.353449	0.147418	2.39759	0.0165031	0.380771	36.6974	6.31886	0.176568	0.682773	2.18084	3.00288	-0.0236563	0.910414	0.129955	0.546608	0.878427	-0.00884582	0.235233	0.0362273	0.0628208	0.0855728	0.139824	0.0667607
2017	CTTN	-0.223433	0.0936713	-2.38529	0.0170657	0.380771	0	1.20564	0.877169	-1.45356	-0.100022	-1.28196	-1.1415	-1.35129	-0.306722	-0.0219908	-0.217313	-0.263541	-0.32523	0.0445271	0.0483385	0.028736	0.0533023	0.0579276
11221	DUSP10	0.25053	0.104716	2.39248	0.0167351	0.380771	0	2.5901	0.628577	-0.0375141	0.117176	0.540633	2.42591	1.45658	-0.00957109	0.0389088	0.151231	0.408386	0.336851	0.0650928	0.11026	0.0782489	0.0283396	0.0534823
81602	CDADC1	0.219516	0.0915262	2.39839	0.0164673	0.380771	0	1.35414	0.852125	-0.00489186	0.466227	1.49826	1.95533	0.906042	-0.00123164	0.120675	0.254132	0.324036	0.216581	0.0633902	0.0669942	0.0287702	0.0274628	0.0571404
10533	ATG7	0.228752	0.0960122	2.38253	0.017194	0.380771	0	1.87795	0.758194	1.18008	0.735192	1.45856	-0.326353	1.8405	0.245073	0.171604	0.257899	-0.0949863	0.382535	0.0431293	0.0544818	0.0312645	0.0847121	0.0431988
54471	MIEF1	-0.218288	0.091474	-2.38634	0.0170168	0.380771	0	1.41453	0.841665	-1.0916	-0.0938757	-1.61296	-1.62874	-0.80891	-0.220343	-0.0212513	-0.261948	-0.400214	-0.17662	0.0407445	0.0512467	0.0263743	0.0603787	0.047674
286451	YIPF6	-0.2756	0.115636	-2.38334	0.0171564	0.380771	4.70212	4.19737	0.379954	0.0417002	-0.110698	-1.53689	-1.07728	-2.59385	0.0108503	-0.0300768	-0.297151	-0.447886	-0.603239	0.0677027	0.0738219	0.0373828	0.172854	0.0540865
79718	TBL1XR1	-0.235054	0.0986273	-2.38325	0.0171604	0.380771	0	1.87834	0.758122	0.181723	-1.47678	-2.00466	-0.702487	-0.912225	0.0534783	-0.512525	-0.295476	-0.161435	-0.215085	0.0866031	0.120447	0.0217251	0.0528101	0.0555922
79734	KCTD17	-0.241535	0.100805	-2.39605	0.0165729	0.380771	0	0.53632	0.96987	-1.49527	-0.552727	-0.994506	-1.07103	-1.26487	-0.393047	-0.17291	-0.22788	-0.182442	-0.28137	0.0690954	0.0978627	0.0525047	0.0290167	0.049484
26119	LDLRAP1	-0.259445	0.108782	-2.38498	0.0170798	0.380771	0	3.29474	0.509766	-0.570576	0.0463485	-2.19118	-1.93012	-0.358529	-0.1347	0.0132182	-0.423066	-0.535362	-0.0943364	0.0557321	0.0813342	0.0372786	0.0769356	0.0692325
10218	ANGPTL7	0.296547	0.124253	2.38664	0.017003	0.380771	36.1902	6.26863	0.179965	1.0717	0.911645	2.24518	2.92966	-0.335168	0.277922	0.25501	0.602532	0.474099	-0.0621898	0.0672504	0.0782462	0.0720205	0.026188	0.034428
93621	MRFAP1	-0.349068	0.146184	-2.38786	0.0169466	0.380771	53.5172	8.60533	0.0717579	-1.75491	-0.518698	-0.512016	-1.09485	-4.0423	-0.304123	-0.115569	-0.0984496	-0.440918	-0.852662	0.0300323	0.0496427	0.036971	0.162185	0.0444936
27006	FGF22	0.219806	0.0920095	2.38895	0.0168965	0.380771	0	1.22826	0.873425	0.768763	0.275831	1.3049	1.76255	1.20787	0.147361	0.0615685	0.414084	0.293345	0.242525	0.0367433	0.0498232	0.100699	0.0276996	0.0403159
51246	SHISA5	0.269898	0.112623	2.39646	0.0165542	0.380771	26.037	5.40811	0.247926	1.86548	-0.233694	2.38044	-0.323741	2.16544	0.400533	-0.0461617	0.418367	-0.122333	0.438666	0.0460997	0.0390184	0.0308887	0.142788	0.0410371
4636	MYL5	0.249006	0.103948	2.3955	0.0165979	0.380771	0	2.90807	0.573325	0.499861	0.0442042	1.31335	0.690505	2.48857	0.13485	0.014903	0.365681	0.121738	0.498321	0.0727782	0.113664	0.0775252	0.0310827	0.0400976
56130	PCDHB6	0.279502	0.116927	2.39039	0.0168303	0.380771	47.9195	7.68042	0.104012	0.179865	2.96235	2.34284	1.73493	0.466725	0.0299799	0.539882	0.763862	0.269712	0.0819859	0.0277823	0.0332144	0.106303	0.0241676	0.0308572
9786	KIAA0586	-0.313035	0.131479	-2.38088	0.0172714	0.380973	51.8683	8.31052	0.0808432	0.654489	-2.58237	-3.15382	-1.00749	-1.60853	0.137583	-0.56538	-0.575521	-0.201876	-0.338895	0.0441903	0.047934	0.0333004	0.0401502	0.044389
50838	TAS2R13	0.208664	0.0876883	2.37961	0.0173309	0.380973	0	3.57904	0.465963	-0.392983	2.21586	0.413515	1.78677	0.90197	-0.0720866	0.36768	0.172054	0.30104	0.188041	0.0336481	0.027533	0.17312	0.0283863	0.043463
4809	SNU13	-0.252589	0.106116	-2.38032	0.0172975	0.380973	28.2234	5.57285	0.2334	-2.19264	0.454911	-2.94936	-0.600437	-0.759116	-0.445968	0.1092	-0.464156	-0.164546	-0.130328	0.0413686	0.0576223	0.0247669	0.0750995	0.0294751
10489	LRRC41	-0.216536	0.0909845	-2.37992	0.0173166	0.380973	0	2.60192	0.626483	0.189465	-1.99837	-1.07536	-0.780438	-1.57196	0.0536455	-0.572803	-0.191315	-0.157519	-0.248512	0.0801692	0.08216	0.0316511	0.0407368	0.0249924
374768	SPEM1	0.204283	0.0858172	2.38044	0.0172921	0.380973	0	1.78273	0.775641	1.28954	1.77003	-0.00790925	1.39229	0.845452	0.278959	0.379914	-0.00171198	0.217977	0.152918	0.0467964	0.0460691	0.0468519	0.0245113	0.0327143
57084	SLC17A6	0.2041	0.0858028	2.37871	0.0173735	0.381347	0	2.35086	0.671525	0.0212389	1.30746	0.521822	2.28631	0.894256	0.00407406	0.27774	0.146167	0.364131	0.152639	0.0367952	0.0451256	0.0784605	0.0253656	0.0291343
79647	AKIRIN1	-0.244569	0.102861	-2.37766	0.0174229	0.381868	0	1.68573	0.793309	-1.0606	-0.962802	-0.384772	-0.859433	-2.09773	-0.287103	-0.320783	-0.0688095	-0.242995	-0.395859	0.0732781	0.111007	0.0319808	0.079941	0.0356108
7372	UMPS	0.215418	0.0906633	2.37602	0.0175006	0.382722	6.3147	4.26961	0.370746	0.326658	0.551158	-0.0389689	2.51236	1.91413	0.0792626	0.153209	-0.00639449	0.417291	0.361898	0.0588774	0.0772714	0.0269262	0.0275876	0.0357462
9221	NOLC1	-0.240151	0.101084	-2.37575	0.0175132	0.382722	0	2.91539	0.572082	-1.1741	-0.725115	-0.947903	-0.343462	-2.37462	-0.310591	-0.241263	-0.167941	-0.0677865	-0.575707	0.0699786	0.110706	0.0313895	0.0389519	0.0587781
92305	TMEM129	0.317715	0.134074	2.36969	0.0178029	0.383003	41.2417	6.80754	0.146415	1.61395	-0.288021	1.00224	0.800955	3.70082	0.432517	-0.0928211	0.245425	0.14192	0.686637	0.0718163	0.103859	0.0599649	0.0313957	0.0344237
51102	MECR	0.263542	0.111113	2.37184	0.0176999	0.383003	34.0142	6.06191	0.194572	1.66218	1.44865	3.0794	-0.0657539	0.446782	0.316919	0.367531	0.579288	-0.0117665	0.0948066	0.036353	0.064367	0.035388	0.0320224	0.0450283
81832	NETO1	0.19822	0.0836085	2.37081	0.0177491	0.383003	0	0.726134	0.948067	0.636782	1.30101	0.568341	1.20268	1.57459	0.108633	0.224033	0.154144	0.193074	0.331412	0.0291034	0.0296527	0.0735585	0.025772	0.0443001
55823	VPS11	-0.203724	0.0859749	-2.36957	0.0178087	0.383003	0	3.34381	0.502021	-0.0860787	-1.65377	-1.33079	-0.138395	-2.10384	-0.0173937	-0.374905	-0.213305	-0.0271941	-0.408575	0.0408315	0.0513918	0.0256911	0.038611	0.0377152
3065	HDAC1	-0.447907	0.188702	-2.37362	0.0176147	0.383003	78.2943	18.4283	0.00101752	-2.42234	-1.03658	-6.84941	-0.856858	-0.962054	-0.485562	-0.186957	-0.99786	-0.311427	-0.17014	0.0401807	0.0325296	0.0212243	0.132097	0.0312764
5931	RBBP7	-0.375882	0.158496	-2.37155	0.0177136	0.383003	53.6979	8.63893	0.0707862	0.786933	-1.10426	-4.36716	-1.0573	-2.42089	0.221102	-0.366727	-0.699838	-0.288691	-0.514441	0.0789421	0.110291	0.0256801	0.0745536	0.0451565
735	C9	0.288964	0.121833	2.37181	0.0177014	0.383003	42.7669	6.98896	0.136473	1.00522	3.32073	-0.536997	2.27356	0.738402	0.187916	0.715771	-0.197325	0.372435	0.131988	0.0349462	0.0464602	0.135027	0.0268341	0.0319508
2696	GIPR	0.217126	0.0916111	2.37008	0.0177843	0.383003	0	3.49922	0.477997	-0.590979	1.50868	1.25476	1.87655	1.18122	-0.125447	0.359715	0.340947	0.312788	0.216267	0.0450586	0.0568492	0.0738333	0.0277831	0.0335211
81848	SPRY4	0.212798	0.0896821	2.3728	0.0176538	0.383003	0	1.96485	0.742223	1.83614	1.24955	0.022703	1.56309	0.467439	0.383462	0.295208	0.00545705	0.246957	0.0914621	0.0436149	0.0558148	0.0577762	0.0249618	0.0382852
116441	TM4SF18	0.224116	0.0945745	2.36973	0.0178009	0.383003	0	3.43273	0.488181	0.447734	2.63638	0.698433	0.621116	1.01182	0.0969837	0.587985	0.20095	0.111377	0.193988	0.0469199	0.0497411	0.0827799	0.0321547	0.0367569
124535	HSF5	0.23028	0.0970859	2.37192	0.0176957	0.383003	0	1.93857	0.747057	1.41601	-0.215995	1.73559	1.26171	0.953244	0.36018	-0.0646182	0.427184	0.206399	0.188442	0.0647004	0.0895	0.060581	0.0267606	0.0390793
119710	C11orf74	-0.276407	0.116786	-2.36678	0.0179436	0.383994	21.7157	5.10958	0.276237	-1.42074	0.372432	-1.83005	-0.5885	-2.56107	-0.298463	0.0928013	-0.348207	-0.146001	-0.718771	0.0441316	0.0620889	0.0362035	0.0615487	0.0787657
85509	MBD3L1	0.212403	0.0898148	2.3649	0.0180352	0.383994	0	3.29883	0.509118	2.06596	1.22778	0.971729	-0.23879	1.45418	0.375076	0.235866	0.351146	-0.0409922	0.291189	0.0329607	0.0369054	0.130583	0.0294695	0.0400971
5266	PI3	0.392143	0.165778	2.36548	0.0180068	0.383994	0	0.257867	0.992369	0.788872	1.26131	1.23933	1.01456	1.03676	0.281581	0.552694	0.368625	0.387221	0.456318	0.127407	0.192012	0.0884695	0.145668	0.193723
168433	RNF133	0.16901	0.0714023	2.36701	0.0179324	0.383994	0	1.14578	0.886943	0.25417	1.02618	2.00295	0.207346	1.25542	0.0618671	0.238555	0.210533	0.0348018	0.212953	0.0592478	0.0540424	0.0110484	0.0281716	0.0287732
23099	ZBTB43	-0.240006	0.101445	-2.36589	0.0179868	0.383994	0	1.38044	0.847587	-0.887133	-1.77017	-0.631044	-0.700142	-1.47273	-0.207978	-0.475224	-0.118893	-0.179557	-0.315954	0.0549612	0.0720718	0.0354972	0.0657707	0.0460255
51377	UCHL5	-0.206726	0.0873972	-2.36536	0.0180127	0.383994	0	2.39632	0.663292	0.268444	-1.75039	-1.65138	-0.764256	-1.24264	0.0576994	-0.400791	-0.238564	-0.166969	-0.26904	0.0461993	0.0524284	0.0208697	0.0477305	0.0468752
26084	ARHGEF26	0.220544	0.0932253	2.36571	0.0179956	0.383994	0	3.63247	0.458024	0.0831672	0.924815	2.19641	0.286704	1.86022	0.0228183	0.27774	0.48125	0.045297	0.340771	0.075277	0.0901921	0.048008	0.0249616	0.0335581
51320	MEX3C	-0.247557	0.105043	-2.35673	0.0184369	0.384712	0	1.65006	0.799769	-0.745019	-0.671562	-1.91902	-1.54261	-0.368608	-0.1806	-0.214551	-0.389215	-0.398338	-0.0744592	0.0587625	0.102068	0.0411358	0.0666793	0.0408044
240	ALOX5	0.307532	0.130123	2.36339	0.0181086	0.384712	42.5176	6.95865	0.138089	0.157424	-0.324935	1.7647	2.41496	2.99237	0.0355851	-0.0858796	0.430856	0.380966	0.703645	0.0510971	0.0698533	0.0596105	0.0248859	0.0552939
55814	BDP1	-0.314256	0.133012	-2.36261	0.0181468	0.384712	31.4442	5.83466	0.211841	0.406144	-2.21669	-2.67441	-0.743382	-1.21059	0.116377	-0.72663	-0.57482	-0.163505	-0.263631	0.0821052	0.107452	0.0461964	0.0483769	0.0474243
6688	SPI1	0.300243	0.127419	2.35634	0.0184561	0.384712	0	2.35952	0.669955	0.79407	0.455278	0.869318	-0.203158	2.5054	0.238689	0.141405	0.260865	-0.0819607	0.523441	0.0903542	0.096467	0.0900478	0.162758	0.0436497
79728	PALB2	-0.226068	0.0958832	-2.35774	0.0183866	0.384712	0	2.88399	0.577423	-1.14045	0.0634618	-0.140246	-1.84904	-1.92345	-0.262553	0.0165649	-0.0290373	-0.354172	-0.387465	0.0530008	0.0681327	0.0428681	0.0366891	0.040579
5693	PSMB5	-0.242672	0.102824	-2.36008	0.0182712	0.384712	25.2408	5.35051	0.253186	-0.978371	-2.62756	-0.0168366	-0.458254	-2.10656	-0.189916	-0.544793	-0.00269273	-0.123352	-0.405067	0.0376803	0.0429891	0.0255786	0.0724568	0.036975
51742	ARID4B	-0.358284	0.151869	-2.35916	0.0183165	0.384712	53.5788	8.61675	0.0714262	-1.04523	-3.47195	0.274157	-1.21417	-2.29254	-0.279293	-0.832352	0.0534662	-0.345069	-0.441253	0.0713992	0.0574734	0.0380329	0.080771	0.0370461
10963	STIP1	0.331902	0.140719	2.35861	0.0183434	0.384712	39.5834	6.6207	0.157343	1.59706	1.11155	3.38179	-0.882572	1.35819	0.339892	0.324719	0.705659	-0.30219	0.288561	0.045294	0.0853409	0.0435409	0.117236	0.0451391
54665	RSBN1	-0.231005	0.0977752	-2.36261	0.0181468	0.384712	0	3.28538	0.511252	0.539285	-1.56491	-2.07368	-0.896638	-1.01164	0.129011	-0.364446	-0.370734	-0.293449	-0.19095	0.0572293	0.054236	0.0319625	0.10711	0.0356276
5534	PPP3R1	-0.344685	0.146063	-2.35983	0.0182831	0.384712	43.7514	7.11128	0.130123	-2.07639	1.10641	-2.7383	-0.823915	-2.48819	-0.438786	0.314624	-0.500999	-0.339425	-0.556228	0.0446569	0.0808631	0.0334744	0.169716	0.0499733
25974	MMACHC	0.232008	0.0982693	2.36095	0.0182284	0.384712	6.68117	4.28638	0.368634	0.0850486	0.112021	2.73751	1.47354	0.822655	0.0200973	0.03267	0.609815	0.244859	0.160812	0.0558397	0.0850551	0.0496233	0.0276126	0.0382123
79815	NIPAL2	0.23507	0.0996071	2.35997	0.0182765	0.384712	13.8242	4.64168	0.326077	0.591544	-0.692509	1.79879	1.80398	2.02455	0.134316	-0.162851	0.453395	0.276258	0.412789	0.0515567	0.0553008	0.0635322	0.0234513	0.0415717
284439	SLC25A42	-0.236417	0.100259	-2.35807	0.0183704	0.384712	0	2.8584	0.581794	-0.457713	-0.610241	-0.596206	-0.964573	-2.55952	-0.0976518	-0.136942	-0.130813	-0.263742	-0.52789	0.0455171	0.0503584	0.0481407	0.0747633	0.0425374
5832	ALDH18A1	-0.251674	0.106697	-2.35878	0.0183352	0.384712	0	3.08127	0.544318	-1.20979	-0.0284773	-0.32359	-0.803134	-2.53593	-0.290617	-0.00646906	-0.109681	-0.190944	-0.509868	0.057706	0.051604	0.114888	0.0565246	0.040424
7248	TSC1	-0.254912	0.108138	-2.35729	0.0184088	0.384712	0	3.25238	0.516512	0.091698	-0.780561	-0.790289	-0.736745	-2.65031	0.0231879	-0.256555	-0.186567	-0.17783	-0.524709	0.0639447	0.108031	0.0557311	0.0582606	0.039196
9931	HELZ	-0.341674	0.145077	-2.35512	0.0185167	0.385438	61.3519	10.3498	0.0349303	-1.73852	-3.41305	-3.02784	-1.08773	0.71557	-0.298828	-0.653601	-0.535516	-0.363088	0.134335	0.0295451	0.0366725	0.0312808	0.111426	0.0352432
479	ATP12A	0.219887	0.09343	2.35349	0.018598	0.386286	0	3.44657	0.486049	0.927642	0.221206	1.78714	2.03124	0.869628	0.218303	0.055497	0.835365	0.396462	0.123245	0.0553808	0.0629427	0.218493	0.0380961	0.0200851
5793	PTPRG	-0.221142	0.0939725	-2.35327	0.0186093	0.386286	0	1.49711	0.827153	-1.17531	-1.02158	-1.85777	-0.587189	-0.902155	-0.298848	-0.287207	-0.424023	-0.109279	-0.148208	0.0646539	0.0790392	0.0520949	0.0346351	0.0269886
200150	PLD5	0.205078	0.0871784	2.3524	0.0186528	0.38665	0	2.22507	0.694442	1.90434	1.60385	0.20415	1.2322	-0.00281266	0.321531	0.317756	0.072578	0.21534	-0.0005104	0.0285072	0.039252	0.126389	0.0305415	0.0329295
2043	EPHA4	-0.278041	0.118292	-2.35047	0.0187499	0.386751	0	0.757401	0.944066	-1.51901	-0.552262	-1.4137	-0.819336	-0.999929	-0.400555	-0.179098	-0.430716	-0.183774	-0.243055	0.0695351	0.10517	0.092826	0.050309	0.0590843
7529	YWHAB	-0.199541	0.0850358	-2.34656	0.0189477	0.386751	0	0.620015	0.960814	-1.82289	-1.07725	-0.988609	-0.500644	-0.644176	-0.296266	-0.221258	-0.151114	-0.18964	-0.124063	0.0264145	0.042186	0.0233647	0.143483	0.0370918
8496	PPFIBP1	-0.221782	0.0944243	-2.34878	0.0188348	0.386751	6.44042	4.27535	0.370022	0.0738015	-2.5856	-1.51408	-0.702348	-0.815881	0.0156139	-0.578039	-0.30657	-0.137039	-0.157086	0.0447602	0.0499794	0.0409982	0.0380702	0.0370698
3033	HADH	-0.191011	0.0813633	-2.34763	0.0188934	0.386751	0	0.536343	0.969868	-1.17826	-0.701773	-1.21857	-1.36241	-0.908746	-0.200494	-0.135288	-0.179429	-0.366702	-0.166787	0.0289547	0.0371641	0.0216811	0.0724449	0.0336851
259230	SGMS1	-0.236993	0.101019	-2.34602	0.0189751	0.386751	0	2.12125	0.71347	0.0116047	-1.81648	-0.890528	-1.44128	-1.20623	0.00306318	-0.58325	-0.181134	-0.253407	-0.289001	0.0696754	0.103098	0.0413719	0.0309128	0.057403
55206	SBNO1	-0.238043	0.101458	-2.34623	0.0189646	0.386751	0	1.71445	0.788092	-0.205176	-0.901982	-0.91994	-0.874701	-2.17995	-0.0596855	-0.30028	-0.200575	-0.15507	-0.450133	0.0846221	0.11083	0.0475374	0.0314294	0.0426373
7046	TGFBR1	0.665284	0.283537	2.34638	0.018957	0.386751	88.1468	33.7462	8.40068e-07	2.43903	0.685757	8.09888	1.61265	2.42713	0.594286	0.208327	1.74982	0.275067	0.472107	0.0593688	0.0922894	0.0466809	0.0290934	0.0378351
389792	IER5L	0.237046	0.100957	2.34798	0.0188756	0.386751	0	2.92535	0.570394	0.34797	2.12654	0.906428	0.508225	1.64779	0.0956812	0.679262	0.188328	0.0995157	0.324165	0.0756084	0.10203	0.0431682	0.0383417	0.0387016
51195	RAPGEFL1	0.259606	0.110461	2.35021	0.018763	0.386751	0	3.44767	0.48588	1.04714	1.44103	-0.73777	2.20439	0.628028	0.307734	0.403266	-0.261705	0.413633	0.136209	0.0863659	0.0783131	0.125829	0.0352089	0.0470386
2551	GABPA	0.231688	0.0985662	2.35058	0.0187442	0.386751	25.9976	5.40523	0.248186	1.50922	1.80873	0.234784	-0.129163	2.69383	0.275059	0.372806	0.046704	-0.0233727	0.491578	0.0332157	0.0424834	0.0395703	0.0327446	0.0332999
2821	GPI	0.251307	0.107009	2.34846	0.0188513	0.386751	0	3.68884	0.449751	1.09447	1.02564	2.50835	-0.642501	0.49966	0.276112	0.259634	0.476787	-0.221004	0.112058	0.0636452	0.0640821	0.0361303	0.118319	0.0502959
10686	CLDN16	0.191683	0.0815127	2.35158	0.0186941	0.386751	0	3.43385	0.488008	1.01748	2.31963	-0.11408	1.50306	0.525001	0.196125	0.507557	-0.0276473	0.223748	0.0824441	0.0371546	0.0478777	0.0587342	0.0221598	0.0246603
51251	NT5C3A	-0.246885	0.105253	-2.34563	0.018995	0.386751	0	2.36137	0.669619	-0.65009	-1.00735	-0.712049	-1.18399	-2.12535	-0.146655	-0.241035	-0.126836	-0.418526	-0.575651	0.0508914	0.0572528	0.0317294	0.124953	0.0733599
59082	CARD18	0.208267	0.0888298	2.34457	0.0190492	0.386954	0	3.76157	0.439234	0.530169	0.0771414	0.736223	2.86711	0.45735	0.108433	0.0183649	0.200642	0.451286	0.0816776	0.0418306	0.0566763	0.074272	0.0247751	0.031894
4719	NDUFS1	-0.315768	0.134719	-2.34391	0.0190829	0.386954	47.1738	7.57199	0.108576	-1.25709	-1.59299	-3.72878	0.282279	-1.12341	-0.378583	-0.482379	-0.582734	0.0503929	-0.245658	0.0906968	0.0916959	0.0244235	0.0318701	0.0478173
27019	DNAI1	0.214338	0.0914272	2.34436	0.0190598	0.386954	0	3.37172	0.49765	1.17604	1.24745	0.391781	2.39972	-0.127936	0.252514	0.318863	0.104453	0.396136	-0.022662	0.0461024	0.0653378	0.071081	0.0272499	0.0313766
5536	PPP5C	0.221612	0.0945875	2.34294	0.0191327	0.387437	0	0.996675	0.9103	0.392449	0.901317	0.571971	1.43892	1.76691	0.0876591	0.239184	0.131345	0.245372	0.359359	0.0498918	0.0704218	0.0527326	0.0290787	0.0413645
114805	GALNT13	0.211002	0.0900954	2.34199	0.0191815	0.387897	0	0.936998	0.919194	1.76259	0.822542	0.726288	1.35433	0.526199	0.370427	0.172912	0.167709	0.231596	0.105295	0.0441675	0.044191	0.0533206	0.0292424	0.0400419
79948	PLPPR3	0.220709	0.0943437	2.33942	0.0193139	0.390046	0	1.17452	0.882276	0.279268	1.06351	0.23193	1.692	1.58798	0.0608267	0.282273	0.0668392	0.297204	0.27802	0.04744	0.0704455	0.0830516	0.0308539	0.0306521
55251	PCMTD2	-0.340062	0.14549	-2.33735	0.0194208	0.391245	43.1425	7.03514	0.134043	-0.568804	0.475006	-1.82078	-1.71705	-3.40175	-0.131819	0.142865	-0.335976	-0.658472	-0.690359	0.053707	0.0904587	0.0340488	0.147064	0.0411856
146849	CCDC42	0.220504	0.0943428	2.33726	0.0194258	0.391245	12.1539	4.55342	0.336261	0.247937	0.0893378	0.293966	2.75262	1.83355	0.0437075	0.0176398	0.111339	0.453205	0.33941	0.0310764	0.0389868	0.143451	0.0271078	0.0342661
1456	CSNK1G3	-0.449075	0.192422	-2.3338	0.0196062	0.393814	74.6952	15.8072	0.00328902	-1.18108	-0.59256	-6.30637	-0.907492	-2.04607	-0.248434	-0.172356	-1.04904	-0.187969	-0.479932	0.044245	0.084603	0.0276708	0.0429028	0.0550198
23645	PPP1R15A	-0.270707	0.115993	-2.33382	0.0196051	0.393814	0	2.92503	0.57045	-0.680329	-0.379213	-0.786173	-0.995328	-2.4812	-0.14327	-0.0966896	-0.213967	-0.373739	-0.624173	0.0443479	0.065012	0.0740729	0.140995	0.063283
2264	FGFR4	0.188078	0.0806206	2.33287	0.0196547	0.394259	0	3.82024	0.43088	0.36791	0.698718	0.143618	1.68091	2.40684	0.0636402	0.114602	0.0307509	0.268531	0.510079	0.0299212	0.0269019	0.0458456	0.0255211	0.0449138
22901	ARSG	0.221918	0.0952173	2.33064	0.0197721	0.395549	0	2.54895	0.635893	0.781617	1.35998	2.2633	0.057033	0.628158	0.150504	0.287377	0.461838	0.0129985	0.149458	0.0370775	0.0446519	0.0416384	0.0519442	0.0566109
55904	KMT2E	-0.214691	0.0920979	-2.33111	0.0197474	0.395549	0	3.28964	0.510575	-2.61946	-0.656164	-0.374783	-0.812238	-0.794606	-0.534907	-0.168595	-0.0691323	-0.191241	-0.14194	0.0416996	0.0660184	0.0340254	0.0554366	0.0319084
8022	LHX3	0.189094	0.0811773	2.3294	0.0198381	0.395711	3.16553	4.13076	0.388598	2.50091	0.32974	0.894348	1.56249	-0.525597	0.35621	0.0552206	0.373222	0.224945	-0.118638	0.020287	0.0280452	0.174149	0.020726	0.05095
54926	UBE2R2	0.216686	0.0930055	2.32982	0.0198157	0.395711	0	3.41703	0.490606	0.121045	-0.895096	1.6907	1.39487	1.79585	0.0356196	-0.298323	0.257333	0.269463	0.358502	0.0865932	0.111079	0.0231662	0.0373191	0.0398511
5866	RAB3IL1	-0.295541	0.126897	-2.32898	0.0198599	0.395711	0	1.91923	0.750611	0.279596	-0.557075	-1.20828	-1.08567	-2.07757	0.0955051	-0.213282	-0.318182	-0.315186	-0.459724	0.116679	0.146582	0.0693456	0.0842831	0.0489647
91833	WDR20	-0.238058	0.102238	-2.32847	0.0198873	0.395728	0	1.23952	0.871551	-0.147353	-1.02675	-0.897912	-1.54242	-1.54921	-0.0335757	-0.293894	-0.200093	-0.32792	-0.33073	0.0519196	0.0819323	0.0496586	0.0451993	0.0455749
11315	PARK7	-0.199659	0.0857844	-2.32746	0.019941	0.395739	0	3.52963	0.473387	-0.580124	-1.96637	-1.92484	-1.00399	0.174656	-0.125185	-0.432009	-0.287803	-0.275235	0.0292479	0.0465657	0.0482675	0.0223564	0.0751529	0.0280429
54437	SEMA5B	-0.210015	0.0902273	-2.32762	0.019932	0.395739	0	2.45353	0.652977	-1.3702	-2.16796	-0.533421	-0.377412	-0.931075	-0.260688	-0.493006	-0.211152	-0.0640602	-0.157877	0.0361973	0.0517134	0.156694	0.0288101	0.0287522
79778	MICALL2	0.403374	0.173455	2.32552	0.0200441	0.39673	68.5153	12.7046	0.0128132	-0.412052	2.1706	4.1104	2.44202	0.888071	-0.0946	0.550864	1.05721	0.407529	0.177877	0.0527083	0.0644068	0.066154	0.0278495	0.0401183
8028	MLLT10	-0.194323	0.083548	-2.32589	0.0200245	0.39673	0	1.70581	0.789662	-0.258043	-1.12439	-0.613333	-1.36576	-1.88235	-0.0512556	-0.220881	-0.0988531	-0.322377	-0.315667	0.0394547	0.0385909	0.025977	0.0557155	0.0281227
23562	CLDN14	-0.241742	0.104116	-2.32186	0.0202403	0.3968	24.8873	5.32533	0.255515	-2.74544	-0.305066	0.0191918	-0.246467	-2.40722	-0.441567	-0.0589167	0.00474117	-0.0592285	-0.464674	0.0258683	0.0372983	0.0610295	0.0577491	0.0372618
1463	NCAN	0.248195	0.106844	2.32296	0.020181	0.3968	5.326	4.22502	0.376408	-0.131736	0.255474	0.809349	0.605451	3.02099	-0.0344695	0.0812591	0.186371	0.146382	0.524831	0.068464	0.10117	0.0530257	0.0584544	0.0301814
128821	CST9L	0.257002	0.110584	2.32405	0.0201231	0.3968	43.0387	7.02231	0.134714	1.48536	0.241306	2.21589	3.25186	-0.357188	0.294093	0.0461539	0.394814	0.522935	-0.0754472	0.039202	0.0365831	0.0317461	0.0258602	0.0446161
1728	NQO1	0.220379	0.0949303	2.32149	0.0202607	0.3968	0	3.06206	0.547495	0.469005	0.169538	1.68169	0.722909	2.20272	0.107234	0.0392152	0.518584	0.126874	0.401058	0.0522773	0.0535023	0.0950928	0.030802	0.033151
8564	KMO	0.440115	0.189504	2.32246	0.0202083	0.3968	60.1278	10.0321	0.0398911	1.33297	0.048416	3.25351	0.413561	3.07694	0.380136	0.0169628	0.915558	0.0776031	0.826947	0.0813271	0.122749	0.0791893	0.0352111	0.0722301
94101	ORMDL1	-0.26282	0.113166	-2.32242	0.0202102	0.3968	0	2.77881	0.595495	0.67194	-1.0539	-2.03183	-0.809242	-1.35168	0.222442	-0.421136	-0.39201	-0.226542	-0.281402	0.109591	0.159678	0.0372235	0.0783684	0.0433421
51118	UTP11	-0.204627	0.0881076	-2.32247	0.0202079	0.3968	0.920528	4.03716	0.401	-1.94971	0.313752	-2.00695	-1.24963	-0.0865141	-0.326112	0.0599439	-0.351626	-0.325089	-0.0195127	0.0279765	0.036502	0.0306965	0.0676766	0.05087
656	BMP8B	0.294166	0.126689	2.32196	0.0202353	0.3968	0	3.07251	0.545765	1.0203	0.313933	-0.0912775	1.48303	2.26202	0.357432	0.12623	-0.0226197	0.38583	0.550022	0.122725	0.161677	0.0614108	0.0676853	0.0591245
51734	MSRB1	0.240274	0.103584	2.3196	0.0203627	0.398276	0	2.12928	0.711994	0.908059	0.443579	0.97045	0.104	2.35285	0.167429	0.125532	0.194226	0.045585	0.51188	0.0339965	0.0800884	0.040056	0.19212	0.0473313
10288	LILRB2	0.269939	0.116431	2.31845	0.020425	0.398969	0	2.98934	0.559611	1.11238	0.804307	2.2564	-0.00329995	1.17851	0.210976	0.204469	0.778792	-0.00113597	0.31886	0.0359716	0.0646266	0.119127	0.118499	0.0732034
10627	MYL12A	-0.276931	0.119561	-2.31623	0.0205457	0.400505	13.9929	4.65078	0.325042	0.433169	-0.146633	-1.91845	-0.735752	-2.70332	0.11108	-0.0438095	-0.421421	-0.29215	-0.483104	0.0657589	0.0892639	0.0482535	0.15767	0.0319365
253959	RALGAPA1	-0.234692	0.101334	-2.31602	0.0205573	0.400505	20.8918	5.05637	0.281562	-0.538017	-0.942481	-3.30855	-0.565893	-0.255996	-0.109968	-0.233415	-0.532552	-0.14132	-0.0455788	0.0417776	0.0613354	0.0259088	0.0623644	0.0317
8805	TRIM24	-0.210059	0.090747	-2.31477	0.0206255	0.400785	0	3.64591	0.456042	-0.0642686	-1.9473	-0.0452871	-1.01058	-2.04564	-0.010915	-0.378583	-0.0126397	-0.210076	-0.414749	0.0288437	0.0377968	0.0778981	0.0432124	0.0411069
55602	CDKN2AIP	-0.229478	0.099117	-2.31522	0.0206007	0.400785	0	2.65703	0.616755	-0.0628455	-0.00493353	-1.90938	-1.81537	-1.03538	-0.0139605	-0.00140384	-0.319019	-0.446099	-0.252667	0.0493463	0.0809693	0.0279158	0.0603853	0.0595521
8997	KALRN	0.342112	0.14787	2.31359	0.02069	0.401515	72.1756	14.3759	0.00618721	0.912447	0.919961	4.77878	1.43933	1.36454	0.153327	0.167465	1.14451	0.217935	0.20637	0.0282374	0.0331366	0.0573597	0.0229261	0.0228731
4239	MFAP4	-0.381806	0.165216	-2.31095	0.0208355	0.403814	60.1686	10.0423	0.0397206	-0.164779	-0.747532	-2.63005	-0.528393	-4.26839	-0.0431631	-0.221517	-0.618679	-0.106272	-0.824912	0.0686154	0.0878119	0.0553354	0.0404508	0.0373497
10229	COQ7	-0.249532	0.108027	-2.3099	0.0208937	0.404388	8.04591	4.35	0.360706	-0.559063	-0.796271	0.124381	-1.48119	-2.65343	-0.143466	-0.254404	0.0263046	-0.280954	-0.608519	0.0658532	0.102076	0.0447256	0.035979	0.0525936
79631	EFL1	-0.19511	0.0844862	-2.30938	0.0209227	0.404388	0	2.67189	0.614143	-1.28866	-1.66647	-1.00785	-1.51901	0.494178	-0.205378	-0.301045	-0.211401	-0.304988	0.104068	0.0254001	0.032634	0.0439969	0.040313	0.0443472
51361	HOOK1	-0.518758	0.224673	-2.30895	0.0209466	0.404388	66.4749	11.9313	0.0178692	-0.664524	-0.593128	-0.874713	-1.84551	-5.31715	-0.197757	-0.19212	-0.350066	-0.442022	-1.25572	0.0885612	0.104917	0.160166	0.0573661	0.0557738
10460	TACC3	0.253447	0.109807	2.30813	0.0209921	0.404744	0	1.87382	0.758953	1.7497	0.873905	1.53628	-0.212844	0.985202	0.432375	0.232872	0.348826	-0.0635512	0.2107	0.061065	0.0710079	0.0515556	0.0891508	0.0457382
158584	FAAH2	-0.264351	0.114621	-2.30631	0.0210936	0.405173	0	3.75067	0.4408	-2.24455	0.246138	-1.34842	-1.44192	-0.271594	-0.598431	0.0669416	-0.421823	-0.283216	-0.0771634	0.0710837	0.0739664	0.0978616	0.0385793	0.0807199
4318	MMP9	0.382463	0.165837	2.30626	0.021096	0.405173	0	3.95046	0.412752	2.10541	0.122598	2.17599	0.278799	0.0942221	0.653315	0.050346	0.793533	0.132018	0.0331745	0.096288	0.168641	0.132989	0.224226	0.123966
54497	HEATR5B	-0.223075	0.0966864	-2.3072	0.0210436	0.405173	0	3.78993	0.435181	0.543275	-1.79518	-1.58463	-1.41683	-1.0377	0.118496	-0.447906	-0.297452	-0.382732	-0.196798	0.0475738	0.0622529	0.0352353	0.0729714	0.0359664
10003	NAALAD2	0.223888	0.0971331	2.30497	0.0211685	0.405521	0	3.96008	0.411436	1.98597	-0.646829	0.277249	2.03788	0.825043	0.488828	-0.187421	0.0893952	0.332707	0.149544	0.0605856	0.0839569	0.103965	0.0266544	0.0328539
56983	POGLUT1	-0.326704	0.141719	-2.3053	0.0211498	0.405521	55.4198	8.97259	0.0617884	-4.39727	0.11365	-1.28598	-0.882066	-1.44647	-0.728236	0.0229861	-0.245803	-0.292079	-0.312656	0.027427	0.0409064	0.0365345	0.109647	0.0467214
84240	ZCCHC9	-0.20836	0.0904186	-2.3044	0.0212005	0.405612	0	3.47521	0.481657	-1.30532	0.505147	-0.996249	-1.18735	-2.10335	-0.261456	0.121736	-0.151309	-0.320193	-0.437915	0.0401201	0.058077	0.0230671	0.0727214	0.0433466
10109	ARPC2	0.194193	0.0842984	2.30364	0.0212427	0.405899	0	3.91083	0.418208	1.82453	1.24075	-0.448029	-0.411973	1.99469	0.308998	0.21797	-0.0892144	-0.156794	0.310267	0.0286822	0.0308624	0.0396514	0.144852	0.0241946
23230	VPS13A	-0.229781	0.099776	-2.30297	0.0212806	0.406103	13.2321	4.61	0.329703	0.355605	-1.40848	-1.17698	-1.14497	-2.39238	0.0623736	-0.328424	-0.290945	-0.227077	-0.487201	0.0307656	0.0543715	0.0611064	0.0393333	0.0414722
3110	MNX1	0.219109	0.0951629	2.30247	0.0213088	0.406121	0	2.48801	0.646784	0.505672	1.90484	0.625354	1.87038	0.125878	0.117546	0.48087	0.179203	0.300024	0.0250829	0.0540357	0.0637293	0.0821176	0.0257307	0.0397062
83659	TEKT1	-0.308022	0.133873	-2.30084	0.0214005	0.407089	43.2325	7.04629	0.133462	-2.20048	-0.956238	0.651914	-1.04014	-3.1658	-0.498554	-0.229245	0.207336	-0.174789	-0.677423	0.0513322	0.0574733	0.101151	0.0282385	0.0457882
1021	CDK6	-0.331823	0.144233	-2.3006	0.0214142	0.407089	47.2201	7.57864	0.108291	-1.64589	-1.56896	-3.12101	-1.39075	0.620936	-0.354256	-0.369454	-0.711956	-0.404225	0.13298	0.046327	0.0554498	0.0520375	0.0844786	0.0458648
60412	EXOC4	-0.255412	0.111195	-2.29699	0.0216196	0.408332	19.4864	4.9681	0.290586	-0.0932032	-2.64157	-1.33356	-0.107774	-1.62828	-0.0224625	-0.633047	-0.269042	-0.0223349	-0.378971	0.0580836	0.0574312	0.0407023	0.0429474	0.0541693
4856	NOV	0.235872	0.102697	2.29678	0.0216311	0.408332	0	1.65348	0.799149	-0.0367806	-0.0296309	1.26596	1.28078	1.91923	-0.0105614	-0.0113618	0.342565	0.232433	0.339979	0.0824526	0.147028	0.0732233	0.0329343	0.03138
658	BMPR1B	-0.203588	0.0886233	-2.29723	0.0216059	0.408332	0	2.93651	0.568506	-0.776441	-0.419464	0.0367313	-0.685122	-2.63898	-0.176689	-0.111297	0.0130792	-0.0991034	-0.427379	0.051785	0.0704013	0.126791	0.0209238	0.0262274
116228	COX20	-0.213332	0.0928862	-2.2967	0.021636	0.408332	0	3.24684	0.517399	-0.0884584	-0.849963	-0.10588	-1.56272	-2.31043	-0.0230084	-0.265636	-0.0181939	-0.35211	-0.378202	0.067654	0.0976732	0.029527	0.0507682	0.0267955
125	ADH1B	0.21525	0.0937274	2.29656	0.021644	0.408332	0	3.25912	0.515436	-0.260383	0.269563	0.385026	1.93526	2.12117	-0.0621198	0.0622636	0.108638	0.327605	0.386869	0.056916	0.0533514	0.0796125	0.0286565	0.0332642
55120	FANCL	-0.315372	0.137295	-2.29704	0.0216165	0.408332	58.9749	9.75013	0.0448537	-2.91232	-0.180608	-2.17376	0.23767	-2.95117	-0.573276	-0.0432499	-0.392361	0.039872	-0.618522	0.038748	0.0573453	0.0325797	0.0281442	0.0439262
3593	IL12B	0.206686	0.0900238	2.2959	0.0216814	0.40852	0	2.88527	0.577206	0.392351	1.21005	1.09971	0.113082	2.30567	0.0903133	0.279602	0.23062	0.0197286	0.419589	0.0529852	0.053392	0.043978	0.0304373	0.033117
54788	DNAJB12	-0.186176	0.0811274	-2.29486	0.0217414	0.409134	0	2.97632	0.561795	-0.132892	-2.26476	-1.42766	-0.188059	-1.01108	-0.0262217	-0.400113	-0.250155	-0.0337948	-0.182552	0.0389332	0.0312119	0.0307021	0.0322932	0.0325989
5089	PBX2	-0.209421	0.0913569	-2.29234	0.021886	0.409785	0	1.91238	0.751871	-0.575385	-0.543859	-2.17101	-1.01016	-0.898129	-0.122221	-0.11563	-0.433423	-0.311498	-0.14214	0.0451206	0.0452032	0.0398566	0.0950886	0.0250469
135656	DPCR1	0.211729	0.0923591	2.29246	0.0218792	0.409785	0	2.37405	0.667322	-0.588028	1.15097	1.02725	1.32428	1.77481	-0.150365	0.311689	0.252865	0.235666	0.279849	0.0653881	0.0733354	0.0605933	0.031669	0.0248625
22808	MRAS	0.2232	0.0973666	2.29237	0.0218844	0.409785	0	2.14486	0.709136	1.076	1.05203	-0.719123	1.53675	1.50217	0.235848	0.224544	-0.245931	0.283522	0.301716	0.0480438	0.045556	0.116955	0.0340382	0.0403421
55195	CCDC198	0.215186	0.0938639	2.29253	0.0218752	0.409785	0	2.29172	0.682277	0.0155034	1.02814	1.16001	0.663333	2.16898	0.00374158	0.305728	0.47254	0.108579	0.335982	0.058245	0.088424	0.16594	0.0267935	0.0239951
8153	RND2	0.461931	0.201634	2.29094	0.0219667	0.410781	69.7272	13.2132	0.0102797	-0.572943	3.14183	3.45976	2.64694	0.624029	-0.158633	0.858346	1.14819	0.449266	0.143904	0.0766596	0.0746378	0.110137	0.0288084	0.0531784
78990	OTUB2	0.228221	0.0996547	2.29012	0.0220143	0.411154	4.05425	4.16902	0.383614	2.4077	-0.0481725	-0.441229	1.4476	1.29482	0.576516	-0.0132201	-0.149669	0.218912	0.266373	0.0573347	0.0753137	0.115063	0.0228686	0.0423218
51555	PEX5L	0.203738	0.0890136	2.28884	0.0220888	0.41203	0	1.05056	0.902034	0.66548	0.499814	1.587	1.12395	1.34716	0.135834	0.124574	0.451043	0.172905	0.24013	0.0416625	0.0621212	0.0807758	0.023666	0.031773
7975	MAFK	-0.271147	0.118587	-2.28648	0.0222262	0.41375	36.9151	6.34066	0.175111	-0.659597	-2.43295	-2.59482	0.139396	-0.973803	-0.150691	-0.578513	-0.520587	0.0246873	-0.212911	0.0521938	0.0565405	0.0402504	0.0313648	0.0478028
7818	DAP3	-0.187141	0.0818529	-2.2863	0.0222366	0.41375	0	2.23262	0.693062	-1.72237	-0.793932	-0.187979	-1.22658	-1.52417	-0.280077	-0.151546	-0.0276963	-0.39876	-0.285679	0.0264425	0.0364352	0.0217083	0.10569	0.0351309
51705	EMCN	0.226451	0.0991595	2.2837	0.0223891	0.415033	0	3.09349	0.542304	-0.577713	1.31735	0.711439	1.53695	1.8361	-0.131259	0.351083	0.284517	0.298291	0.30838	0.0516215	0.0710265	0.159934	0.0376667	0.0282087
6819	SULT1C2	0.304707	0.133394	2.28426	0.0223565	0.415033	59.5335	9.88471	0.0424152	1.27886	3.30902	-1.60748	3.02282	2.04004	0.224595	0.602636	-0.542691	0.451135	0.3513	0.0308429	0.0331673	0.113976	0.0222734	0.0296536
10570	DPYSL4	0.245819	0.107635	2.28382	0.022382	0.415033	0	3.4525	0.485138	-0.13452	-0.669396	0.771216	1.54765	2.28301	-0.0484247	-0.269401	0.259577	0.247105	0.46245	0.129587	0.161969	0.113287	0.0254928	0.0410309
8273	SLC10A3	-0.278432	0.121969	-2.2828	0.0224419	0.415496	53.6015	8.62096	0.0713042	-1.681	0.829302	-3.21017	-0.966012	-2.53126	-0.276259	0.153381	-0.520036	-0.25361	-0.453299	0.0270083	0.034207	0.0262428	0.0689233	0.0320698
3702	ITK	-0.280381	0.122917	-2.28106	0.0225451	0.416372	0	3.24304	0.518007	-1.98366	-0.631382	0.830726	-1.17044	-1.43272	-0.443706	-0.170033	0.335212	-0.432605	-0.329116	0.0500329	0.0725243	0.162826	0.136611	0.0527688
11020	IFT27	0.210658	0.0923323	2.28152	0.0225174	0.416372	0	2.24454	0.690884	0.856692	1.03731	0.822377	-0.0286827	2.22774	0.169252	0.265974	0.152554	-0.0067036	0.412962	0.0390318	0.0657447	0.0344118	0.0546232	0.034363
7922	SLC39A7	0.21828	0.0957352	2.28004	0.0226054	0.416969	2.9541	4.12176	0.389778	1.22629	-0.414999	2.09135	0.39979	1.8089	0.298453	-0.110714	0.457607	0.0672873	0.356372	0.0592327	0.071172	0.0478777	0.0283271	0.0388128
10916	MAGED2	-0.213907	0.093979	-2.27612	0.0228389	0.417146	0	0.845609	0.932231	-0.623176	-1.34972	-0.367473	-1.17704	-1.51518	-0.145306	-0.299002	-0.0899586	-0.189658	-0.345325	0.0543684	0.0490747	0.0599285	0.0259636	0.0519431
70	ACTC1	0.201692	0.0885718	2.27716	0.022777	0.417146	0	3.31007	0.507339	1.4642	0.509978	-0.640907	2.1806	0.962156	0.312827	0.0996519	-0.176876	0.353016	0.181548	0.0456462	0.0381829	0.0761632	0.0262082	0.0356034
64421	DCLRE1C	0.244516	0.107368	2.27735	0.0227652	0.417146	0	3.66054	0.453892	1.20473	1.61974	0.0317338	-0.226896	2.17243	0.262037	0.383311	0.0072395	-0.0724125	0.502111	0.047309	0.0560034	0.0520444	0.101853	0.0534206
170622	COMMD6	-0.402233	0.176634	-2.27722	0.0227732	0.417146	69.5361	13.1303	0.0106564	-5.11312	0.116675	-3.01347	-0.568974	-1.11373	-0.847461	0.0221523	-0.560712	-0.204809	-0.289911	0.0274706	0.0360479	0.0346216	0.129573	0.0677596
79180	EFHD2	0.21774	0.095553	2.27873	0.0226831	0.417146	0	2.7624	0.59834	0.535166	1.5179	0.864243	-0.273224	2.13144	0.0837905	0.336851	0.210303	-0.109386	0.423762	0.0245139	0.0492484	0.0592135	0.160281	0.0395273
3763	KCNJ6	0.245816	0.107986	2.27637	0.0228239	0.417146	26.2134	5.42104	0.246758	2.90426	0.893014	-0.222668	2.01505	0.0484444	0.562727	0.201595	-0.0632854	0.325944	0.0100414	0.0375425	0.0509615	0.080778	0.0261646	0.0429641
57092	PCNP	-0.208053	0.0913209	-2.27826	0.0227108	0.417146	0	3.12196	0.537627	-0.497004	0.477303	-1.55041	-1.37511	-1.88227	-0.10619	0.114556	-0.276493	-0.503533	-0.291327	0.0456508	0.0576036	0.0318035	0.134086	0.023955
7187	TRAF3	0.295406	0.129773	2.27633	0.0228264	0.417146	43.8982	7.12989	0.129181	-0.164815	0.782272	2.03073	0.808871	3.36259	-0.03574	0.212709	0.497528	0.145995	0.647077	0.0470237	0.0739363	0.0600251	0.0325774	0.0370309
116966	WDR17	-0.194596	0.0855793	-2.27387	0.0229739	0.419097	0	2.0415	0.728127	-1.22815	-0.723529	0.0615715	-0.527282	-2.21321	-0.223807	-0.163704	0.0194601	-0.0837594	-0.362611	0.0332083	0.0511927	0.0998922	0.0252337	0.0268432
6120	RPE	-0.186022	0.0818417	-2.27294	0.0230297	0.419602	0	1.26689	0.866968	-1.32705	-1.35487	-1.6245	-0.231953	-0.378968	-0.252012	-0.227856	-0.267207	-0.0401922	-0.094907	0.0360634	0.0282828	0.0270556	0.0300252	0.0627178
3096	HIVEP1	-0.257542	0.113399	-2.2711	0.0231407	0.42111	19.0978	4.94424	0.293067	-1.36544	-0.862315	-2.80398	-0.719328	-0.139635	-0.321887	-0.233224	-0.70623	-0.149726	-0.0269627	0.0555729	0.0731502	0.0634368	0.0433251	0.0372854
23190	UBXN4	-0.216846	0.0955244	-2.27006	0.0232041	0.421749	0	2.4993	0.644761	-0.537338	-0.716242	-2.52445	-0.622489	-0.300639	-0.114906	-0.188428	-0.420064	-0.224555	-0.0553775	0.0457291	0.0692107	0.0276884	0.130132	0.0339296
79895	ATP8B4	0.299312	0.13188	2.26958	0.0232334	0.421766	0	3.18812	0.526853	1.80797	0.677457	2.10744	-0.174457	0.373724	0.520441	0.19963	0.558705	-0.0574982	0.115453	0.0828631	0.0868337	0.0702841	0.108625	0.095436
1407	CRY1	-0.235319	0.103771	-2.26767	0.0233495	0.423359	0	2.76637	0.597652	0.391643	-1.49436	-1.19587	-1.3223	-1.53088	0.0893492	-0.444292	-0.302145	-0.309957	-0.286897	0.0520477	0.0883948	0.0638354	0.0549468	0.0351212
8764	TNFRSF14	0.29632	0.130724	2.26676	0.023405	0.423849	53.4505	8.59301	0.0721175	-0.125259	2.32304	2.86363	-0.777355	3.10009	-0.0238577	0.484619	0.444416	-0.279455	0.507546	0.0362778	0.0435198	0.024085	0.129237	0.0268042
2219	FCN1	0.261966	0.115641	2.26534	0.0234919	0.424851	0	1.62316	0.804624	1.52377	1.61362	1.32623	0.0797603	0.253046	0.284126	0.336366	0.690859	0.0345614	0.0676478	0.0347685	0.0434529	0.271359	0.187762	0.0714673
5884	RAD17	-0.201108	0.0888104	-2.26446	0.0235458	0.424851	0	1.89884	0.754358	-1.02715	-0.459742	-0.852253	-0.833133	-2.08321	-0.184716	-0.0953421	-0.200548	-0.138582	-0.485506	0.0323396	0.0430072	0.0553734	0.0276684	0.0543154
81573	ANKRD13C	-0.29673	0.131018	-2.2648	0.0235252	0.424851	41.4651	6.83353	0.144952	-0.528552	0.117934	-1.05136	-1.31487	-3.72432	-0.131862	0.0366007	-0.202462	-0.264712	-0.74352	0.0622388	0.0963158	0.0370836	0.0405306	0.0398559
246175	CNOT6L	-0.242714	0.107209	-2.26393	0.0235785	0.424927	27.3305	5.50437	0.239345	-1.76973	-1.24397	-2.80454	-0.0709856	-0.1239	-0.395125	-0.330601	-0.498317	-0.0124408	-0.0252956	0.0498491	0.0706298	0.0315709	0.0307155	0.0416816
10481	HOXB13	-0.210893	0.0932925	-2.26056	0.0237865	0.42758	3.96501	4.16515	0.384117	-1.23116	-2.5865	0.681449	-0.451362	-0.8325	-0.242706	-0.470457	0.28978	-0.0742795	-0.175952	0.0388627	0.0330839	0.180829	0.0270824	0.0446701
59350	RXFP1	0.267116	0.118185	2.26015	0.0238118	0.42758	42.8125	6.99454	0.136177	0.250921	1.52423	0.97349	0.413469	3.57821	0.0471097	0.286289	0.326143	0.0709355	0.632471	0.035249	0.0352781	0.112241	0.0294334	0.0312428
83758	RBP5	-0.24808	0.10974	-2.26061	0.0237833	0.42758	7.68405	4.33295	0.362818	0.203798	-0.59787	-0.33337	-1.13285	-2.88996	0.05518	-0.190029	-0.106223	-0.193752	-0.58164	0.0733099	0.101024	0.101528	0.0292515	0.0405065
83473	KATNAL2	0.315235	0.139568	2.25865	0.0239053	0.427971	58.9297	9.7394	0.0450539	4.45119	0.46744	0.823365	0.829877	1.367	0.830213	0.104344	0.201068	0.148713	0.244901	0.0347878	0.0498292	0.0596348	0.0321121	0.0320953
4615	MYD88	0.216793	0.0959564	2.25929	0.0238653	0.427971	0	3.56031	0.468768	2.13394	1.08341	-0.149807	-0.492884	1.63459	0.39202	0.231626	-0.0324725	-0.19092	0.30276	0.0337483	0.0457079	0.0469857	0.150043	0.034307
8925	HERC1	-0.234448	0.103832	-2.25795	0.0239485	0.427971	0	2.96719	0.563331	-0.039718	-0.495771	-2.50479	-0.992437	-0.747868	-0.00825106	-0.135258	-0.451908	-0.370194	-0.17511	0.0431563	0.0744327	0.0325506	0.13914	0.0548241
22920	KIFAP3	-0.199768	0.0884718	-2.25799	0.0239463	0.427971	0	0.970589	0.914222	-1.36818	-0.539703	-1.39009	-1.33043	-0.451107	-0.32926	-0.163021	-0.199342	-0.304562	-0.0799691	0.0579148	0.0912379	0.0205642	0.0524041	0.0314258
5550	PREP	-0.236848	0.104971	-2.25632	0.0240507	0.429133	24.5217	5.29954	0.25792	-0.617576	-2.78846	-0.139492	-1.32698	-1.2514	-0.131417	-0.637358	-0.0224303	-0.36746	-0.223267	0.0452814	0.0522441	0.0258566	0.0766822	0.0318318
55262	C7orf43	0.24983	0.110749	2.25582	0.0240818	0.429133	20.6985	5.04404	0.282808	0.484963	1.85879	1.97762	-0.79212	1.94293	0.121496	0.475342	0.333079	-0.197703	0.403923	0.0627635	0.0653961	0.0283665	0.0622941	0.0432197
4618	MYF6	0.203425	0.0901894	2.25553	0.0240998	0.429133	0	3.17447	0.529064	-0.225269	0.431973	0.553905	1.54485	2.30894	-0.0452862	0.0984197	0.217697	0.240659	0.413036	0.0404137	0.05191	0.154466	0.0242678	0.0320001
135458	HUS1B	-0.272759	0.121051	-2.25325	0.0242437	0.429148	27.4121	5.51056	0.238802	0.581316	-0.873823	-1.31445	-1.50145	-2.8268	0.132182	-0.236228	-0.453447	-0.26932	-0.552395	0.0517035	0.0730829	0.119005	0.0321749	0.0381865
84464	SLX4	-0.209695	0.0930159	-2.2544	0.0241713	0.429148	0	3.79027	0.435133	0.364565	-0.66821	-1.29218	-0.495279	-2.52549	0.0818826	-0.169183	-0.234917	-0.112171	-0.458	0.0504468	0.0641043	0.0330509	0.0512934	0.0328881
23212	RRS1	-0.2659	0.117965	-2.25406	0.0241923	0.429148	0	2.32145	0.676866	-2.24466	0.00174969	-0.262707	-1.34086	-0.70486	-0.508725	0.000494273	-0.10803	-0.307453	-0.182433	0.0513649	0.0798011	0.169102	0.0525762	0.0669885
1350	COX7C	-0.368225	0.163421	-2.25323	0.0242447	0.429148	61.145	10.2947	0.0357456	-2.49814	0.70635	-5.12917	-0.884352	-1.0867	-0.534372	0.185288	-0.699531	-0.366317	-0.240323	0.0457567	0.0688106	0.0186003	0.171579	0.0489065
2913	GRM3	0.219535	0.0973753	2.25452	0.0241632	0.429148	0	2.83366	0.586036	0.405164	0.377918	-0.252525	2.53309	1.06266	0.100847	0.116447	-0.0751486	0.422951	0.188953	0.0619532	0.0949432	0.088559	0.0278791	0.0316169
26	AOC1	-0.274309	0.121799	-2.25214	0.0243136	0.429857	0	1.76877	0.778191	0.00249452	-0.758033	-1.53232	-0.440558	-1.92981	0.000854831	-0.264498	-0.500105	-0.114604	-0.374788	0.117432	0.12175	0.106518	0.0676701	0.0377172
4928	NUP98	-0.208414	0.0925899	-2.25093	0.0243898	0.430444	0	1.42651	0.839575	-0.498774	-0.533271	-2.15427	-0.976049	-0.605396	-0.110191	-0.141751	-0.375065	-0.213374	-0.114225	0.0488075	0.0706571	0.0303119	0.0477903	0.0355995
4110	MAGEA11	0.180793	0.0803436	2.25024	0.0244334	0.430444	0	2.19787	0.699418	2.23046	0.321099	1.26498	0.735113	0.207062	0.32156	0.0581654	0.301339	0.120105	0.0449241	0.0207844	0.0328135	0.0567472	0.0266938	0.0470717
8331	HIST1H2AJ	0.362263	0.160956	2.25069	0.0244051	0.430444	64.1436	11.1556	0.0248698	0.813548	3.47387	3.62472	0.269192	0.208438	0.174476	0.737497	0.669585	0.0429156	0.0828243	0.0459946	0.0450707	0.0341241	0.025416	0.157892
83732	RIOK1	-0.201313	0.0894844	-2.2497	0.0244677	0.430539	0	2.18452	0.701865	-0.911584	-0.80918	-2.3351	-0.462712	-0.305169	-0.17685	-0.176253	-0.420799	-0.0852653	-0.0740283	0.0376372	0.0474441	0.0324742	0.0339565	0.0588457
29761	USP25	-0.301656	0.134344	-2.2454	0.0247424	0.430728	42.1236	6.91127	0.140652	-0.104279	0.582888	-3.38931	-1.49936	-1.99507	-0.0312564	0.182389	-0.680175	-0.275099	-0.393011	0.0898426	0.0979104	0.0402734	0.0336639	0.0388054
10782	ZNF274	-0.252814	0.112769	-2.24187	0.0249697	0.430728	20.4253	5.02673	0.284566	-2.25332	-1.23026	0.58754	-0.506946	-2.08918	-0.473665	-0.285967	0.13921	-0.118149	-0.448885	0.0441872	0.0540303	0.0561392	0.0543167	0.0461656
1073	CFL2	0.194868	0.0868227	2.24444	0.0248042	0.430728	0	3.92911	0.415685	1.11541	0.0946366	1.03835	0.53689	2.51934	0.216656	0.018501	0.232094	0.0863972	0.545165	0.037729	0.0382184	0.0499617	0.0258958	0.0468254
26751	SH3YL1	-0.236348	0.105332	-2.24384	0.0248425	0.430728	0	3.43037	0.488544	0.577235	-0.177461	-1.63317	-1.25647	-1.9633	0.157686	-0.0556748	-0.336731	-0.270091	-0.424327	0.074625	0.0984264	0.042511	0.0462082	0.0467119
92104	TTC30A	0.392595	0.174957	2.24395	0.0248358	0.430728	64.2075	11.1755	0.0246604	0.737019	1.35591	0.795554	0.79952	4.85391	0.163649	0.391494	0.273963	0.141644	0.940503	0.0493026	0.083366	0.118589	0.0313861	0.0375437
128408	BHLHE23	0.200554	0.0893023	2.24578	0.024718	0.430728	0	1.44857	0.835712	0.889846	0.558526	0.45889	2.24479	0.372403	0.178973	0.119222	0.149256	0.340342	0.073359	0.0404524	0.0455644	0.105791	0.0229869	0.0388044
23560	GTPBP4	-0.216624	0.0963626	-2.24801	0.0245756	0.430728	13.1632	4.60634	0.330124	0.663396	-1.54092	-2.14327	-0.826593	-1.56956	0.120437	-0.311554	-0.337428	-0.250284	-0.343996	0.0329591	0.0408796	0.0247862	0.0916817	0.0480343
5356	PLRG1	-0.18792	0.0837562	-2.24366	0.0248544	0.430728	0	1.90236	0.753712	-0.140701	-1.30021	-1.07539	-0.919362	-1.79564	-0.0250008	-0.288469	-0.148932	-0.255381	-0.355847	0.0315727	0.0492231	0.0191798	0.077162	0.0392727
5660	PSAP	-0.260908	0.116252	-2.24434	0.0248105	0.430728	25.4138	5.36292	0.252044	-0.542271	-1.36792	-0.184582	-0.295293	-3.22227	-0.111537	-0.288271	-0.0380079	-0.116566	-0.624124	0.0423065	0.0444103	0.0424005	0.155825	0.0375161
256764	WDR72	0.27157	0.121092	2.24267	0.0249179	0.430728	65.0972	11.4604	0.0218491	0.703838	1.5022	0.924196	0.741597	4.62633	0.182179	0.292868	0.094395	0.116327	0.662416	0.0669967	0.0380091	0.0104321	0.0246052	0.0205017
23072	HECW1	-0.2818	0.125418	-2.24689	0.0246469	0.430728	39.0013	6.55751	0.161202	-2.33511	-2.94298	0.95991	-0.63375	-0.968033	-0.450851	-0.586437	0.4375	-0.118143	-0.190235	0.0372778	0.039707	0.207728	0.0347522	0.0386191
55783	CMTR2	-0.279791	0.124676	-2.24415	0.0248228	0.430728	31.0389	5.80037	0.214561	-0.367531	0.0472277	-1.08843	-0.942037	-3.47784	-0.0865606	0.0136601	-0.23491	-0.232182	-0.664192	0.0554693	0.0836589	0.04658	0.0607463	0.0364727
91775	NXPE3	-0.243609	0.108645	-2.24225	0.0249449	0.430728	0	2.47117	0.649805	-0.624542	-1.93203	-0.401742	-0.777667	-1.61553	-0.189123	-0.648603	-0.083034	-0.169405	-0.357168	0.0916996	0.112702	0.0427186	0.047453	0.0488783
54955	C1orf109	-0.251489	0.112082	-2.24379	0.0248457	0.430728	0	3.87003	0.423881	0.321438	-0.530802	-0.486513	-1.39627	-2.51661	0.0892064	-0.182861	-0.119822	-0.294785	-0.573268	0.0770187	0.11868	0.0606569	0.0445732	0.05189
4709	NDUFB3	-0.227136	0.101127	-2.24606	0.0247005	0.430728	0	2.63639	0.620391	-1.84049	0.431763	-1.78996	-0.760353	-0.570292	-0.361244	0.110049	-0.313158	-0.301647	-0.136683	0.0385241	0.0649648	0.0306084	0.157386	0.0574428
317781	DDX51	-0.231129	0.103044	-2.24302	0.0248952	0.430728	0	0.560434	0.967357	-0.729177	-0.58393	-1.10835	-0.261549	-1.84988	-0.19683	-0.181601	-0.185345	-0.112431	-0.343841	0.0728642	0.0967193	0.0279643	0.184783	0.0345485
84944	MAEL	0.192836	0.08591	2.24463	0.0247918	0.430728	0	2.12849	0.712141	0.276279	-0.148761	1.51348	1.64677	1.43733	0.0576623	-0.034177	0.326039	0.288909	0.228548	0.0435599	0.0527823	0.046407	0.0307792	0.0252837
49856	WRAP73	0.273744	0.122152	2.24101	0.0250252	0.431186	37.53	6.40307	0.171001	0.948816	2.39678	2.41252	-1.08036	1.41881	0.206945	0.517016	0.485162	-0.327708	0.246673	0.0475715	0.046532	0.0404418	0.092011	0.030227
168850	ZNF800	-0.221946	0.0991386	-2.23875	0.0251724	0.431229	0	3.63016	0.458365	0.0253112	0.0570502	-2.47011	-0.604878	-1.47341	0.00589617	0.0143725	-0.454314	-0.162134	-0.300249	0.0542644	0.0634677	0.0338283	0.0718478	0.0415256
4068	SH2D1A	-0.25617	0.114383	-2.23959	0.0251176	0.431229	0	1.07555	0.898131	-0.673458	-1.07804	-0.493794	-1.57468	-1.32368	-0.15097	-0.302111	-0.123241	-0.440469	-0.342164	0.0502532	0.0785344	0.0622902	0.0782432	0.0668191
1844	DUSP2	-0.298493	0.133277	-2.23964	0.025114	0.431229	0	0.671363	0.954813	-0.302065	-0.683222	-0.909549	-1.66072	-1.24261	-0.099498	-0.259691	-0.317371	-0.442709	-0.293916	0.1085	0.144475	0.121753	0.0710634	0.055947
1781	DYNC1I2	-0.243431	0.108729	-2.23889	0.0251631	0.431229	22.9485	5.19133	0.268223	0.467083	-0.966796	-3.05723	-1.07366	-0.942391	0.0969426	-0.241034	-0.492408	-0.312988	-0.190776	0.0430765	0.0621565	0.0259413	0.0849815	0.0409813
50945	TBX22	0.196924	0.0879094	2.24008	0.0250858	0.431229	0	1.59385	0.809897	1.17913	1.19003	-0.0328441	1.84925	0.620075	0.273282	0.280256	-0.0068223	0.274853	0.12577	0.0537156	0.0554625	0.0431466	0.0220907	0.0411404
158798	AKAP14	0.329735	0.14751	2.23534	0.0253948	0.432515	75.0141	16.009	0.00300707	1.72111	-1.13385	1.89498	3.29967	4.35833	0.252185	-0.189464	0.440175	0.491096	0.655073	0.0214694	0.0279217	0.0539563	0.0221509	0.0225912
57471	ERMN	0.200274	0.0895788	2.23573	0.0253695	0.432515	0	0.679081	0.953883	1.81583	0.635349	0.802205	0.870413	0.758625	0.318389	0.139619	0.21272	0.141099	0.173536	0.0307444	0.0482906	0.0703144	0.0262785	0.0523271
90338	ZNF160	-0.211246	0.0944373	-2.23689	0.0252936	0.432515	0	3.8608	0.425172	-2.19314	-0.862531	-1.81826	0.0531769	-0.0417942	-0.443326	-0.19296	-0.368143	0.0131211	-0.00806498	0.0408616	0.0500477	0.0409939	0.060883	0.037237
1347	COX7A2	-0.260019	0.116333	-2.23512	0.0254092	0.432515	27.3858	5.50857	0.238977	-1.00722	0.794816	-2.15522	-0.714873	-2.64687	-0.2017	0.211172	-0.307964	-0.304677	-0.585642	0.0401019	0.0705891	0.0204182	0.181644	0.0489553
92799	SHKBP1	0.268699	0.120156	2.23625	0.0253355	0.432515	12.9448	4.59479	0.331456	0.30221	1.44948	2.69396	-0.329979	0.985763	0.0766352	0.392837	0.626931	-0.106923	0.203795	0.0643041	0.0734514	0.0541571	0.104995	0.0427408
23234	DNAJC9	-0.318905	0.142691	-2.23494	0.0254216	0.432515	52.4058	8.40439	0.0778388	0.880152	-2.64523	-2.44068	-0.955741	-2.17356	0.181596	-0.624272	-0.39516	-0.28573	-0.498316	0.0425693	0.0556956	0.0262133	0.0893784	0.0525611
8161	COIL	-0.264426	0.118393	-2.23345	0.0255191	0.433289	46.8397	7.52442	0.110637	0.0549869	-0.650846	-3.53065	-1.08102	-1.66328	0.00880561	-0.130129	-0.617157	-0.276152	-0.323357	0.0256449	0.039975	0.030555	0.0652573	0.0377952
9247	GCM2	0.201086	0.0900384	2.23333	0.025527	0.433289	0	2.9158	0.572014	0.399699	1.33866	1.96895	1.44047	0.00832574	0.0951802	0.299087	0.434491	0.254169	0.0014487	0.0567057	0.0499173	0.0486955	0.0311342	0.0302767
4648	MYO7B	0.23182	0.103819	2.23292	0.0255543	0.433289	4.97258	4.20931	0.378419	0.389736	1.96392	-0.677272	1.21222	1.92071	0.117665	0.647509	-0.202801	0.20396	0.333453	0.091149	0.108704	0.0896629	0.0283092	0.0301403
3181	HNRNPA2B1	-0.21512	0.0963712	-2.2322	0.0256018	0.433601	0	0.999333	0.909897	-0.930002	-0.125778	-1.51162	-0.884461	-1.42621	-0.175025	-0.0298237	-0.276085	-0.344142	-0.284844	0.0354185	0.0562226	0.0333583	0.151397	0.0398887
727	C5	0.263616	0.118127	2.23163	0.0256394	0.433746	16.1215	4.7688	0.311852	0.998669	2.47897	1.32796	-0.495695	1.23185	0.240891	0.618463	0.27352	-0.116508	0.366385	0.0581834	0.0622423	0.0424235	0.0552438	0.0884628
6037	RNASE3	0.403922	0.181078	2.23065	0.0257045	0.434354	0	3.97369	0.409578	0.773239	0.369507	2.81703	0.312844	0.426011	0.311151	0.163848	1.01324	0.118192	0.200814	0.161926	0.196625	0.129372	0.142732	0.222202
26000	TBC1D10B	0.293187	0.131559	2.22855	0.0258435	0.435223	29.3412	5.661	0.225935	0.537485	1.35481	2.3734	-0.892642	2.34344	0.151575	0.425119	0.498163	-0.255	0.44322	0.0795283	0.0984611	0.0440558	0.0816069	0.0357711
143501	C11orf40	0.201726	0.0905028	2.22894	0.0258176	0.435223	0	1.458	0.834053	0.160169	1.19911	0.693898	0.897964	1.91699	0.0326085	0.231772	0.204526	0.161732	0.356847	0.0414483	0.03736	0.086877	0.0324396	0.0346517
164284	APCDD1L	0.209282	0.093883	2.22918	0.0258021	0.435223	0	2.05071	0.726432	0.292079	0.572572	1.6552	1.87282	0.599688	0.0636707	0.118187	0.428372	0.33994	0.123288	0.0475203	0.0426071	0.0669791	0.0329467	0.0422661
5792	PTPRF	-0.264903	0.118963	-2.22677	0.0259629	0.436739	0	2.3028	0.680259	-0.0824042	-0.790616	-1.41418	-0.219579	-2.1404	-0.0245297	-0.266323	-0.32352	-0.0601269	-0.50285	0.0886103	0.113472	0.0523354	0.0749816	0.0551933
4055	LTBR	0.21816	0.0980304	2.22543	0.0260522	0.436974	0	2.31035	0.678885	0.536304	1.79213	1.89598	-0.0184436	0.410473	0.115011	0.411155	0.343814	-0.00601691	0.0846573	0.0459893	0.0526348	0.0328837	0.106428	0.0425363
23513	SCRIB	-0.172712	0.077638	-2.22457	0.0261098	0.436974	0	0.719706	0.948877	-0.285705	-0.898284	-1.4214	-0.706779	-1.50332	-0.0536481	-0.16137	-0.197736	-0.149386	-0.263717	0.0352592	0.0322713	0.0193525	0.0446741	0.0307732
51442	VGLL1	-0.230375	0.103526	-2.22529	0.026062	0.436974	0	0.731109	0.947438	-0.572077	-0.841201	-0.186931	-1.09604	-1.84713	-0.140289	-0.213851	-0.0729219	-0.209274	-0.354161	0.0601364	0.0646281	0.152178	0.0364571	0.0367629
79839	CCDC102B	0.211203	0.0949491	2.22438	0.0261227	0.436974	0	0.643408	0.95812	0.588982	0.652421	0.749195	1.79353	1.02014	0.121604	0.147779	0.247296	0.317216	0.19696	0.0426274	0.0513058	0.108954	0.0312818	0.0372767
5304	PIP	0.231056	0.103875	2.22437	0.0261234	0.436974	25.2686	5.3525	0.253002	0.593797	-0.296907	0.179443	2.78185	2.16141	0.126313	-0.0759011	0.0370572	0.477375	0.385033	0.0452505	0.0653513	0.0426471	0.0294477	0.0317336
124565	SLC38A10	0.203249	0.0914958	2.2214	0.0263238	0.439831	0	2.15743	0.706829	0.884076	1.34742	0.939299	-0.177302	1.89241	0.18204	0.302028	0.175759	-0.0388852	0.366828	0.0423988	0.0502443	0.0350128	0.0480993	0.0375747
9584	RBM39	-0.187346	0.0843556	-2.22091	0.0263569	0.439892	0	2.85147	0.582982	-1.95798	-0.781303	-1.70064	-0.637618	0.202679	-0.381959	-0.167509	-0.248011	-0.187684	0.0347914	0.0380556	0.0459658	0.0212677	0.0866427	0.0294664
115811	IQCD	0.202353	0.0911548	2.21988	0.0264269	0.440567	0	3.34958	0.501116	0.383465	2.53365	0.115903	0.893056	0.948696	0.076959	0.534603	0.0325945	0.146761	0.196174	0.0402779	0.0445213	0.0790862	0.0270061	0.0427594
10743	RAI1	-0.208574	0.094013	-2.21857	0.0265161	0.44156	0	1.01465	0.907567	-0.839665	-1.6465	-0.776698	-0.621874	-1.23721	-0.199676	-0.458437	-0.139945	-0.148738	-0.211324	0.0565511	0.077524	0.0324648	0.0572055	0.0291747
7874	USP7	-0.267593	0.120691	-2.21718	0.0266105	0.442638	20.2627	5.01648	0.285611	0.440391	-0.137603	-2.47662	-0.643425	-2.39489	0.11145	-0.0425103	-0.387257	-0.213368	-0.577679	0.064045	0.0954406	0.02445	0.109967	0.0581837
22809	ATF5	-0.269518	0.121606	-2.21632	0.0266693	0.442998	33.5409	6.01874	0.197753	-0.510337	0.560037	-3.21408	-0.928257	-1.80545	-0.111168	0.150027	-0.548183	-0.227121	-0.413233	0.0474509	0.0717639	0.0290895	0.0598657	0.0523866
820	CAMP	0.408306	0.184254	2.216	0.0266917	0.442998	0	1.28723	0.863539	1.53616	0.895142	1.48524	0.158408	0.897649	0.49271	0.358772	0.93362	0.0759337	0.348693	0.102876	0.16064	0.395135	0.229781	0.150894
391	RHOG	0.240033	0.108391	2.2145	0.0267942	0.444206	0	3.87067	0.423792	0.445876	1.7881	-0.41796	-0.146364	2.27651	0.0989611	0.400373	-0.129311	-0.0599304	0.42674	0.0492608	0.0501358	0.0957192	0.167658	0.035139
558	AXL	-0.185807	0.0839997	-2.212	0.0269669	0.446494	0	3.30821	0.507632	-1.8393	-0.188232	-2.16256	-0.208186	-0.250394	-0.386647	-0.0437816	-0.326183	-0.0385253	-0.047789	0.0441902	0.0540996	0.0227503	0.0342444	0.0364257
8913	CACNA1G	0.307878	0.139236	2.2112	0.0270221	0.446494	63.5525	10.9747	0.0268498	-0.207574	4.47783	0.977466	1.32605	1.70651	-0.0414136	0.784949	0.208241	0.218375	0.329262	0.0398052	0.030729	0.0453866	0.02712	0.0372275
60492	CCDC90B	-0.209301	0.0946544	-2.21121	0.0270212	0.446494	0	1.56247	0.815522	-0.507234	-0.239975	-1.7063	-0.887504	-1.56138	-0.0953358	-0.054533	-0.297292	-0.244418	-0.36993	0.0353261	0.05164	0.0303566	0.0758447	0.0561334
11196	SEC23IP	-0.235275	0.106503	-2.20908	0.0271688	0.44743	28.9866	5.63274	0.228306	-1.88489	0.463815	-2.51473	-1.76687	0.0103953	-0.330534	0.113686	-0.437277	-0.40431	0.00206558	0.0307513	0.0600798	0.0302365	0.0523624	0.039483
2819	GPD1	0.199739	0.090395	2.20962	0.0271312	0.44743	0	2.66324	0.615662	-0.39323	0.868798	0.85677	1.21636	2.10301	-0.0889773	0.194444	0.24282	0.191874	0.382381	0.0511995	0.0500902	0.0803229	0.0248833	0.0330606
149840	C20orf196	-0.220545	0.0998344	-2.2091	0.0271674	0.44743	0	1.52414	0.822357	-1.43083	-0.023793	-0.748395	-1.8356	-0.653383	-0.337094	-0.00679554	-0.15419	-0.358668	-0.144996	0.0555038	0.0815737	0.0424476	0.0381794	0.0492469
113730	KLHDC7B	0.211058	0.095628	2.20708	0.0273087	0.447495	0	1.3375	0.854981	1.62127	0.408471	0.519519	0.617464	1.66197	0.322086	0.104998	0.189392	0.100899	0.339913	0.0394669	0.066076	0.132899	0.0267022	0.0418298
1399	CRKL	-0.335633	0.152039	-2.20755	0.027276	0.447495	56.671	9.2317	0.055562	-1.60986	-0.492202	-0.147782	-1.25055	-4.12152	-0.287478	-0.110297	-0.0308589	-0.468458	-0.816538	0.0318882	0.0502161	0.0436033	0.140326	0.0392498
23769	FLRT1	0.203127	0.0920429	2.20687	0.0273229	0.447495	0	3.62111	0.459703	2.16039	0.655882	1.29894	1.21333	-0.484285	0.480164	0.160807	0.255017	0.205763	-0.107111	0.0493988	0.0601118	0.0385441	0.0287593	0.0489174
168374	ZNF92	-0.323506	0.14653	-2.20778	0.0272597	0.447495	66.9402	12.0993	0.0166279	-2.89432	-3.77731	-1.9382	0.657648	-0.65948	-0.463186	-0.621451	-0.416229	0.100457	-0.197735	0.0256106	0.0270675	0.0461175	0.0233331	0.089901
183	AGT	0.249081	0.112819	2.20779	0.0272591	0.447495	40.1345	6.68164	0.153699	0.113843	0.752134	1.3201	0.5797	3.72469	0.0233067	0.151417	0.419248	0.0963896	0.548437	0.0419131	0.0405284	0.100861	0.0276474	0.0216808
64949	MRPS26	-0.205339	0.0931202	-2.20509	0.0274476	0.447569	0	2.13136	0.711613	-1.33254	-0.016041	-1.80428	-1.40084	0.00836937	-0.276744	-0.00413845	-0.279798	-0.350193	0.00189393	0.0431315	0.0665595	0.0240481	0.0624938	0.0512082
1293	COL6A3	-0.299183	0.135615	-2.20613	0.0273752	0.447569	47.5617	7.62802	0.106195	-0.832629	0.531236	-3.03469	-0.60599	-2.98937	-0.230641	0.156149	-0.754877	-0.113447	-0.43521	0.0767307	0.0863986	0.0618763	0.0350476	0.0211953
644815	FAM83G	-0.226562	0.102733	-2.20535	0.0274293	0.447569	12.3258	4.56234	0.335219	-2.63284	-1.30445	-1.01207	-0.0758863	-0.52392	-0.545577	-0.311957	-0.322089	-0.0126931	-0.106927	0.0429401	0.0571915	0.101281	0.0279773	0.0416528
26240	FAM50B	-0.274591	0.124494	-2.20566	0.027408	0.447569	30.2502	5.73479	0.219849	-1.45651	0.544855	-1.10243	-0.69748	-3.02847	-0.358352	0.155336	-0.255794	-0.143613	-0.633158	0.0605333	0.08128	0.0538361	0.0423958	0.0437097
55802	DCP1A	-0.337857	0.153268	-2.20436	0.0274992	0.447921	70.0822	13.37	0.00960261	0.449405	-4.38581	-2.0665	-0.783282	-2.17751	0.0760135	-0.860154	-0.364752	-0.201189	-0.347854	0.0286092	0.0384639	0.0311549	0.0659736	0.0255196
4154	MBNL1	-0.224635	0.101941	-2.20358	0.0275542	0.448328	0	0.475778	0.975816	-1.12753	-1.29976	-0.532498	-1.02996	-1.01313	-0.21789	-0.32719	-0.1344	-0.351904	-0.186833	0.0373435	0.0633683	0.0637039	0.116737	0.0340076
10449	ACAA2	-0.224931	0.102312	-2.19848	0.0279151	0.452224	0	3.96192	0.411183	-1.42303	-2.29071	-0.044968	-1.05307	-0.641782	-0.308003	-0.695258	-0.00835413	-0.238467	-0.166514	0.0468474	0.0921192	0.034514	0.0512798	0.067317
6229	RPS24	-0.212519	0.0966185	-2.19957	0.0278377	0.452224	0	3.21603	0.522345	-1.14719	0.338465	-2.36394	-0.613135	-0.812016	-0.211375	0.0797294	-0.458974	-0.218294	-0.161665	0.0339498	0.0554891	0.0376966	0.126757	0.0396373
80314	EPC1	-0.204715	0.0930929	-2.19904	0.0278753	0.452224	0	1.14856	0.886493	-1.24214	-0.281863	-0.322422	-0.641971	-1.96109	-0.239738	-0.0857364	-0.0686887	-0.150365	-0.320351	0.0372505	0.0925239	0.0453859	0.0548611	0.0266843
54328	GPR173	0.238562	0.108508	2.19855	0.0279096	0.452224	28.017	5.55687	0.234776	1.30331	2.412	-0.964356	1.34376	1.56249	0.266515	0.567664	-0.259367	0.209919	0.307445	0.0418168	0.0553896	0.0723359	0.0244039	0.038717
7582	ZNF33B	-0.231292	0.10532	-2.19608	0.0280859	0.454498	0	3.74186	0.442067	-0.517372	-1.22329	0.295197	-1.28225	-2.25149	-0.110434	-0.293644	0.0763483	-0.275876	-0.59546	0.0455621	0.057621	0.066892	0.0462897	0.0699461
4629	MYH11	0.227177	0.103618	2.19244	0.0283478	0.455048	33.9726	6.05809	0.194852	2.61686	-0.0394135	0.150182	1.10893	2.25053	0.462682	-0.00674969	0.0294775	0.209988	0.478454	0.031261	0.0293277	0.0385251	0.0358577	0.0451971
25831	HECTD1	-0.260561	0.118847	-2.19241	0.0283502	0.455048	30.1267	5.72464	0.220677	-0.317336	-0.135814	-0.871638	-1.18517	-3.31927	-0.0671182	-0.0365507	-0.152878	-0.39428	-0.615099	0.0447345	0.0724268	0.0307621	0.110675	0.0343404
284680	SPATA46	0.213571	0.0973861	2.19304	0.0283048	0.455048	0	2.3969	0.663187	0.757157	2.07808	0.378193	1.46192	0.185405	0.181716	0.489474	0.174848	0.245372	0.0339193	0.0575987	0.05548	0.213745	0.0281709	0.0334696
4943	TBC1D25	-0.224803	0.102517	-2.19283	0.0283194	0.455048	0	2.84804	0.583569	-0.447956	-0.896822	0.334167	-1.73521	-1.87856	-0.113208	-0.231082	0.0815359	-0.328001	-0.423812	0.0638682	0.0663926	0.0595349	0.0357313	0.0508974
2563	GABRD	-0.213986	0.0975896	-2.19271	0.0283282	0.455048	0	3.97859	0.408911	-0.0252492	-2.51604	0.0213078	-0.873788	-1.30059	-0.0059159	-0.595107	0.00708528	-0.153394	-0.248385	0.0548969	0.0559443	0.11057	0.0308182	0.0364729
7776	ZNF236	0.276275	0.125918	2.19409	0.0282288	0.455048	32.9333	5.96421	0.201837	-0.63636	0.0805788	3.04024	1.42384	1.73944	-0.201237	0.0292105	0.675465	0.261783	0.292134	0.100002	0.131412	0.0493616	0.0338033	0.0282063
28990	ASTE1	-0.218785	0.0996861	-2.19474	0.028182	0.455048	0	1.82659	0.767614	-0.192908	-0.210267	-1.92401	-0.69173	-1.54329	-0.0445164	-0.078324	-0.403572	-0.137593	-0.298993	0.0532524	0.138754	0.0439974	0.039566	0.0375341
55628	ZNF407	-0.213894	0.0975698	-2.19221	0.0283642	0.455048	0	1.7996	0.772556	-0.717309	-0.841042	-1.38908	-0.123112	-1.8544	-0.181946	-0.254727	-0.26034	-0.0234403	-0.390548	0.0643388	0.0917306	0.0351259	0.0362518	0.0443547
65244	SPATS2	-0.304458	0.138969	-2.19084	0.0284633	0.456147	52.0091	8.33492	0.0800521	0.753714	-2.23061	-2.50308	-0.481739	-2.62438	0.207933	-0.586102	-0.449469	-0.0834276	-0.563476	0.0761088	0.0690399	0.0322441	0.0299914	0.0460995
153770	PLAC8L1	0.212563	0.0971244	2.18856	0.0286289	0.456701	0	3.90346	0.419229	-0.447372	1.20261	-0.512374	2.18806	1.41305	-0.105664	0.279747	-0.198878	0.350952	0.287873	0.0557847	0.0541102	0.15066	0.0257263	0.041504
2662	GDF10	-0.207489	0.0948188	-2.18827	0.0286498	0.456701	14.8877	4.69967	0.319523	0.514236	-0.436197	-0.642082	-1.68645	-2.65438	0.120654	-0.0949873	-0.138299	-0.262938	-0.477366	0.05505	0.0474205	0.0463936	0.0243084	0.0323428
80746	TSEN2	-0.224757	0.102674	-2.18903	0.0285948	0.456701	4.56971	4.19154	0.380704	-2.2981	0.668791	-0.774439	-0.742192	-1.54978	-0.462864	0.16833	-0.189864	-0.162593	-0.333144	0.0405665	0.0633491	0.0601052	0.0479923	0.0462086
51001	MTERF3	-0.248763	0.113681	-2.18825	0.0286511	0.456701	33.5584	6.02033	0.197635	-0.300442	-0.68443	-1.07127	-0.504521	-3.41228	-0.0631293	-0.181512	-0.161544	-0.125445	-0.669083	0.044151	0.0703323	0.0227399	0.061823	0.0384478
3617	IMPG1	0.179852	0.0821518	2.18927	0.0285774	0.456701	0	3.06695	0.546684	1.30079	1.60582	-0.860785	1.57486	0.606627	0.250518	0.306142	-0.284879	0.246552	0.0916956	0.0370906	0.0363456	0.10953	0.0245096	0.0228483
57678	GPAM	-0.22579	0.103246	-2.18692	0.0287481	0.457758	0.101282	4.00406	0.405457	-0.948876	-0.532336	-2.68611	-0.315464	-0.540973	-0.290074	-0.173478	-0.592401	-0.0560364	-0.116505	0.0934538	0.106198	0.0486389	0.0315529	0.0463808
2559	GABRA6	0.237034	0.108414	2.18637	0.0287883	0.457909	19.9914	4.99946	0.287353	0.751389	2.35367	-0.27695	2.22193	0.321317	0.181048	0.597143	-0.0834006	0.382381	0.0558762	0.0580576	0.0643671	0.0906853	0.0296165	0.0302403
83862	TMEM120A	0.218825	0.100114	2.18577	0.0288323	0.458121	0	2.33912	0.673657	0.178662	0.0264599	2.34273	0.170499	1.25165	0.0468554	0.00884863	0.37935	0.043007	0.264242	0.0687787	0.111834	0.0262202	0.0636261	0.0445696
7965	AIMP2	-0.317071	0.145124	-2.18483	0.0289016	0.458244	58.9281	9.73902	0.0450609	-4.05486	-1.25977	0.469766	-0.929452	-1.95903	-0.702376	-0.270143	0.0894284	-0.258169	-0.4006	0.0300045	0.0459835	0.0362399	0.0771534	0.0418158
3250	HPR	0.230083	0.105299	2.18504	0.028886	0.458244	0	1.6353	0.802435	0.874273	0.416502	1.3107	1.10796	1.58945	0.228482	0.101513	0.51604	0.1722	0.48225	0.0682984	0.0594027	0.155009	0.024156	0.0920553
204474	PDILT	0.34408	0.157632	2.18281	0.0290502	0.459134	74.2413	15.5288	0.0037213	-0.490363	0.889947	2.5424	1.81866	5.08276	-0.103795	0.188518	0.32724	0.318725	0.949199	0.0448036	0.0448719	0.0165671	0.0307134	0.0348751
738	VPS51	-0.23699	0.10856	-2.18304	0.0290332	0.459134	22.0683	5.1327	0.273951	-1.19192	0.331141	-2.70515	-1.54881	-0.448272	-0.25738	0.0753028	-0.494243	-0.459016	-0.0829023	0.0466292	0.0517125	0.0333809	0.0878335	0.0342019
255928	SYT14	0.202752	0.0928857	2.18281	0.0290497	0.459134	0	1.63051	0.803298	1.35836	0.734881	-0.176212	1.39721	1.42364	0.340247	0.188741	-0.0392396	0.233864	0.264606	0.0627423	0.0659627	0.0495882	0.028016	0.0345461
84873	ADGRG7	0.229476	0.105216	2.181	0.0291833	0.46075	3.19693	4.1321	0.388423	-0.0242866	-0.389935	0.233717	2.46956	1.72425	-0.00965733	-0.0837419	0.0896825	0.381244	0.401283	0.158118	0.0461213	0.147243	0.0238323	0.0541626
55101	DMAC2	0.287907	0.132071	2.17994	0.0292621	0.461505	58.2394	9.57841	0.0481608	1.07105	2.19129	4.4981	-0.444096	0.495563	0.199675	0.458119	0.613644	-0.133823	0.085173	0.0347559	0.0437077	0.0186112	0.0908053	0.0295397
8243	SMC1A	-0.286652	0.131575	-2.17862	0.0293599	0.461956	28.6724	5.60793	0.230404	-0.394394	0.285639	-1.33782	-0.906058	-3.1748	-0.118013	0.0976527	-0.302906	-0.177247	-0.729458	0.0895365	0.116878	0.0512645	0.038269	0.0527921
7186	TRAF2	0.216138	0.0992608	2.17748	0.029445	0.461956	1.95006	4.07955	0.395346	0.555219	1.25807	1.56236	-0.571831	2.06843	0.156915	0.391745	0.312416	-0.114183	0.371669	0.0798735	0.0969604	0.0399858	0.0398719	0.0322872
55311	ZNF444	-0.215237	0.0988407	-2.17761	0.0294349	0.461956	0	3.23886	0.518677	-0.474316	0.76244	-2.06655	-1.60118	-0.583227	-0.134979	0.236342	-0.314313	-0.382308	-0.134386	0.0809833	0.0960883	0.0231331	0.0570092	0.0530927
2566	GABRG2	0.215979	0.099165	2.17798	0.0294076	0.461956	25.2205	5.34906	0.253319	-0.559613	2.40003	0.662692	2.18055	0.867201	-0.108908	0.471921	0.160383	0.352152	0.157007	0.0378744	0.0386639	0.0585724	0.0260812	0.0327794
969	CD69	-0.304397	0.139794	-2.17747	0.0294457	0.461956	0	1.42628	0.839616	-0.888498	-2.0754	-0.601667	-0.628109	-0.560734	-0.227233	-0.602456	-0.237981	-0.265051	-0.161822	0.0654077	0.0842654	0.156448	0.17807	0.0832844
830	CAPZA2	0.3111	0.142959	2.17616	0.0295434	0.463003	49.0787	7.85526	0.0970263	1.39205	2.90424	3.33212	-0.619989	-0.236106	0.288155	0.595326	0.55239	-0.228005	-0.062939	0.042849	0.0420187	0.0274821	0.135245	0.07106
57111	RAB25	-0.254888	0.117164	-2.17548	0.0295945	0.463315	0	3.61326	0.460868	-2.31443	0.292388	-0.128374	-0.743945	-1.52773	-0.633095	0.0858555	-0.0567536	-0.179545	-0.30195	0.0748258	0.086222	0.19545	0.0582458	0.0390639
54106	TLR9	0.227613	0.104655	2.1749	0.0296379	0.463509	0	2.93696	0.568429	-0.425261	0.821274	0.262562	2.22389	1.34059	-0.112906	0.276871	0.0684099	0.375351	0.311829	0.0704887	0.113652	0.0678849	0.0284871	0.0541056
79898	ZNF613	-0.195179	0.089789	-2.17375	0.0297241	0.463565	1.31684	4.05338	0.39883	-1.17794	-0.587652	-2.60325	-0.504466	0.308711	-0.198924	-0.141135	-0.496169	-0.0923789	0.0768905	0.0285186	0.0576808	0.0363268	0.0335337	0.0620355
1576	CYP3A4	0.207804	0.0955759	2.17423	0.0296882	0.463565	0	1.58466	0.811546	0.163492	1.91102	0.517617	1.02003	1.15101	0.0343311	0.382299	0.174285	0.170723	0.27683	0.0440942	0.0400199	0.113371	0.028013	0.0578457
10461	MERTK	-0.347573	0.159906	-2.1736	0.0297349	0.463565	50.2156	8.03464	0.0903175	0.112187	-0.726002	-1.47269	-0.879476	-3.93003	0.0369091	-0.269502	-0.316254	-0.167279	-0.887027	0.108238	0.1378	0.0461156	0.0361774	0.0509426
728	C5AR1	0.269331	0.123961	2.17271	0.0298023	0.463647	0	1.6957	0.791499	0.77663	0.529956	0.83641	-0.0951895	2.19629	0.178921	0.161455	0.254305	-0.0450635	0.488879	0.0530756	0.0928159	0.0924426	0.224115	0.0495474
57402	S100A14	0.297291	0.136818	2.1729	0.0297879	0.463647	41.3888	6.82463	0.145451	0.773905	-0.565102	0.412518	2.27926	3.34529	0.17467	-0.150458	0.159911	0.405232	0.651261	0.0509402	0.070889	0.15027	0.0316095	0.0379003
10713	USP39	-0.168541	0.0776218	-2.17131	0.0299076	0.464799	0	1.67893	0.794542	-1.88455	-0.912045	-0.347987	-1.07871	-0.851744	-0.2999	-0.157436	-0.0483665	-0.310165	-0.157994	0.0253243	0.0297973	0.0193181	0.0826751	0.0344083
60488	MRPS35	-0.208788	0.0962012	-2.17032	0.0299825	0.465478	0	1.76144	0.779529	-0.307196	-0.870105	-1.91098	-1.4028	-0.0241274	-0.0739441	-0.237386	-0.304906	-0.327394	-0.00543331	0.0579394	0.0744335	0.0254576	0.0544692	0.0507115
2131	EXT1	-0.241287	0.111305	-2.1678	0.0301738	0.467961	20.9422	5.05959	0.281238	-1.53115	-0.148601	-2.93316	-0.0548733	-0.589654	-0.313675	-0.0374194	-0.606098	-0.0139557	-0.119076	0.0419688	0.0634089	0.0426987	0.0646814	0.0407803
6482	ST3GAL1	-0.380169	0.175408	-2.16734	0.030209	0.46802	56.1588	9.12383	0.0580777	-2.87284	-0.535406	0.324332	-0.919418	-3.36803	-0.649763	-0.193816	0.0664397	-0.321034	-0.736668	0.051155	0.131043	0.0419639	0.12192	0.0478401
112744	IL17F	-0.194933	0.0899917	-2.16612	0.0303022	0.468976	0	0.993611	0.910763	-0.947475	-1.74214	-0.941381	-0.574606	-0.732483	-0.191648	-0.351593	-0.239718	-0.10124	-0.141356	0.040914	0.0407297	0.0648442	0.0310433	0.0372421
4094	MAF	-0.353657	0.163335	-2.16522	0.0303711	0.469068	67.6884	12.3794	0.0147418	-0.310276	-2.35764	-4.10542	0.434117	-2.2618	-0.0642443	-0.571832	-0.744135	0.0889903	-0.472064	0.042872	0.0588278	0.0328539	0.0420214	0.0435606
9087	TMSB4Y	0.309426	0.142887	2.16554	0.0303466	0.469068	14.215	4.66282	0.323676	1.44489	0.122648	0.640249	0.385994	2.71563	0.575761	0.059773	0.231731	0.0715886	0.696765	0.158786	0.237513	0.131	0.0343974	0.0658312
23286	WWC1	-0.21649	0.100121	-2.16229	0.0305961	0.470753	0	3.82558	0.430125	-0.414561	-1.50984	-0.343586	-0.00522249	-2.43547	-0.0995845	-0.462661	-0.139107	-0.000918564	-0.421708	0.057704	0.0938993	0.163918	0.030936	0.029982
57864	SLC46A2	0.260939	0.120649	2.1628	0.0305569	0.470753	13.1713	4.60677	0.330074	0.443824	1.32305	1.62678	-0.307456	2.28763	0.0981905	0.341639	0.53309	-0.0749089	0.536116	0.0489461	0.0666775	0.107384	0.0593608	0.0549217
26156	RSL1D1	-0.265594	0.122838	-2.16215	0.0306065	0.470753	36.4789	6.29712	0.178031	-3.46459	0.0855235	-0.720784	-1.12921	-0.858434	-0.620922	0.0196977	-0.12514	-0.375139	-0.201279	0.0321197	0.0530468	0.0301428	0.110366	0.054977
5613	PRKX	-0.291958	0.135003	-2.16261	0.0305714	0.470753	32.4185	5.91878	0.205297	0.141797	-1.197	-3.07941	-0.866961	-0.945282	0.0326884	-0.28179	-0.800323	-0.216637	-0.254156	0.053144	0.0554196	0.0675454	0.0624406	0.07229
7559	ZNF12	-0.242396	0.112182	-2.16074	0.0307155	0.471941	24.7807	5.31778	0.256217	0.131457	-1.10095	-3.54037	-0.423075	-0.333788	0.0371108	-0.352669	-0.492329	-0.0882032	-0.0750192	0.0796955	0.102612	0.0193381	0.0434645	0.050513
440026	TMEM41B	-0.190784	0.0883646	-2.15905	0.0308463	0.472136	0	1.98115	0.739227	-0.175534	-0.442257	-1.49772	-1.14281	-1.69324	-0.03291	-0.093572	-0.215903	-0.352611	-0.392031	0.0351507	0.0447654	0.0207805	0.0952015	0.0536048
2853	GPR31	0.200391	0.092852	2.15818	0.0309138	0.472136	0	2.45652	0.652439	0.301837	1.40976	-0.00957777	2.12942	0.707957	0.0562524	0.321527	-0.00291295	0.382623	0.138338	0.0347326	0.052017	0.0924991	0.0322864	0.038183
57654	UVSSA	-0.199882	0.0925849	-2.1589	0.0308576	0.472136	0	3.24784	0.517239	-2.05884	0.0157512	0.103426	-0.854867	-1.71118	-0.381402	0.00367048	0.0209898	-0.254292	-0.295543	0.0343179	0.0543022	0.041187	0.0884851	0.0298297
8943	AP3D1	0.201944	0.0935071	2.15967	0.0307982	0.472136	13.2535	4.61114	0.329572	0.0822092	1.56426	1.9011	-0.763184	1.92681	0.0158995	0.345809	0.323272	-0.204503	0.310907	0.0374047	0.0488713	0.0289153	0.0718027	0.0260366
51026	GOLT1B	-0.221311	0.102469	-2.15979	0.0307889	0.472136	0	1.99602	0.736491	0.451708	-0.65782	-1.24608	-1.89186	-0.944506	0.157151	-0.252711	-0.244178	-0.397588	-0.168239	0.121037	0.147582	0.0383993	0.0441657	0.0317282
255374	MBLAC1	0.274317	0.127133	2.15772	0.0309497	0.472136	44.1977	7.16816	0.127264	3.30141	1.54473	0.770315	-0.109705	0.976534	0.678439	0.362935	0.207284	-0.0186056	0.198058	0.0422302	0.0552016	0.0724093	0.028763	0.0411349
10787	NCKAP1	0.203444	0.0942869	2.15772	0.0309499	0.472136	0	1.07595	0.898068	0.738253	0.334567	0.838752	2.03497	0.479706	0.172076	0.111606	0.167274	0.341076	0.0972072	0.0543287	0.111278	0.0397732	0.0280921	0.0410626
4782	NFIC	0.214616	0.0996032	2.15471	0.0311849	0.473782	30.6461	5.76752	0.217196	-0.364532	2.07002	2.44364	0.47174	1.26404	-0.0618605	0.369751	0.448705	0.0809464	0.300847	0.0287976	0.0319058	0.0337168	0.0294435	0.0566463
9540	TP53I3	0.272367	0.126343	2.15578	0.0311007	0.473782	21.6145	5.10299	0.276893	2.99701	1.11683	0.254833	0.062141	0.933287	0.671322	0.306285	0.0837257	0.0128984	0.234158	0.0501747	0.0752101	0.107946	0.0430838	0.0629486
8702	B4GALT4	-0.192966	0.0895223	-2.1555	0.0311225	0.473782	0	3.68608	0.450154	0.486324	-0.892267	-2.24674	-1.27045	-0.798596	0.100257	-0.201135	-0.422873	-0.260097	-0.14708	0.042499	0.0508144	0.0354254	0.0419139	0.0339196
22844	FRMPD1	0.262901	0.121999	2.15494	0.0311664	0.473782	45.6662	7.3619	0.117955	2.71081	-0.597473	-0.0425933	1.20141	3.25462	0.557171	-0.151868	-0.0121426	0.209865	0.449441	0.0422452	0.0646097	0.081272	0.0305135	0.0190698
1539	CYLC2	0.213029	0.0989702	2.15246	0.0313613	0.474046	0	2.50335	0.644035	-0.533313	0.575967	0.461823	1.37801	2.09954	-0.175431	0.205646	0.0967683	0.258351	0.361243	0.108205	0.127481	0.0439051	0.0351491	0.0296041
5694	PSMB6	-0.199419	0.0926336	-2.15277	0.0313369	0.474046	0	0.646221	0.957792	-1.12628	-0.457322	-1.06838	-0.701415	-1.47294	-0.219088	-0.0968272	-0.169469	-0.239205	-0.333906	0.0378391	0.0448282	0.0251608	0.116303	0.05139
151887	CCDC80	0.174493	0.0810129	2.15389	0.0312489	0.474046	0	1.74359	0.782784	0.00305533	1.38805	1.3515	1.29256	0.979231	0.00054848	0.312034	0.307668	0.211715	0.146009	0.032226	0.0505356	0.0518242	0.0268288	0.0222325
153443	SRFBP1	-0.228543	0.10613	-2.15343	0.0312853	0.474046	0	2.12924	0.712002	-0.737445	-0.993388	-0.69339	-0.414785	-2.1408	-0.206381	-0.301785	-0.144333	-0.0839626	-0.508923	0.0783216	0.0922904	0.0433291	0.0409756	0.0565138
286464	CFAP47	0.313546	0.145624	2.15311	0.0313097	0.474046	73.8242	15.2813	0.00415197	0.502176	3.71981	3.60317	1.57862	-0.285496	0.101789	0.745679	0.535529	0.272702	-0.0364002	0.0410853	0.0401849	0.02209	0.0298418	0.0162558
23478	SEC11A	-0.22477	0.104507	-2.15077	0.031494	0.474127	0	1.24889	0.869985	-0.94251	-2.05628	-0.248715	-0.295356	-0.7804	-0.158897	-0.411798	-0.101025	-0.107949	-0.184473	0.0284223	0.0401056	0.164989	0.133582	0.0558765
4794	NFKBIE	0.284033	0.132031	2.15126	0.0314558	0.474127	42.0292	6.90002	0.141267	0.887093	1.18955	3.399	0.554557	0.363184	0.203467	0.339868	0.798994	0.104445	0.074169	0.052608	0.0816307	0.0552568	0.035472	0.0417054
6861	SYT5	0.197364	0.0917241	2.15171	0.0314201	0.474127	0	3.05351	0.548911	1.49519	2.04938	0.237331	1.08874	0.0784204	0.345585	0.475696	0.0699584	0.171074	0.0144215	0.0534213	0.0538785	0.0868904	0.02469	0.0338192
84851	TRIM52	-0.222745	0.103563	-2.15081	0.0314911	0.474127	0	2.95203	0.565885	-0.303234	-1.79021	-0.46879	-0.674085	-1.89923	-0.0757785	-0.506833	-0.0806216	-0.188722	-0.44544	0.0624506	0.0801539	0.0295765	0.0783816	0.0550077
1665	DHX15	-0.320235	0.148948	-2.14998	0.0315569	0.474595	55.0251	8.89385	0.0638083	-0.391603	-1.88795	-0.0791531	-1.0246	-3.85269	-0.0846135	-0.454245	-0.0144294	-0.34464	-0.719997	0.0466861	0.0578896	0.0332321	0.113142	0.0349247
83596	BCL2L12	-0.174305	0.0810969	-2.14935	0.0316069	0.474868	1.6675	4.06783	0.396904	0.325878	0.0304954	-1.99357	-0.9031	-1.98074	0.059052	0.00670657	-0.253253	-0.202562	-0.417221	0.0328367	0.0483652	0.0161379	0.0503088	0.0443687
10409	BASP1	0.240388	0.112044	2.14548	0.0319145	0.475109	9.31235	4.41074	0.353263	2.40708	-0.128789	0.23257	0.0602407	1.96318	0.492808	-0.0337645	0.0469697	0.0286617	0.415084	0.0419156	0.0687324	0.0407878	0.226372	0.0447043
112840	WDR89	-0.211672	0.0985819	-2.14717	0.0317801	0.475109	24.0696	5.26798	0.260889	-1.8232	-1.51785	-0.0948415	-0.16423	-2.27505	-0.342416	-0.291877	-0.0183351	-0.0252538	-0.59737	0.0352729	0.036978	0.0373741	0.0236455	0.0689455
257397	TAB3	-0.253439	0.118234	-2.14355	0.0320693	0.475109	10.9803	4.49339	0.343332	0.285783	-0.024831	-1.82239	-1.12655	-2.25818	0.0794147	-0.00785877	-0.443374	-0.209062	-0.621863	0.0772198	0.100166	0.0591911	0.0344393	0.0758351
256957	HEATR9	-0.310933	0.14489	-2.146	0.0318733	0.475109	51.6109	8.26632	0.0822956	-1.57841	0.327969	-0.583662	-1.27931	-3.85317	-0.363324	0.077033	-0.226767	-0.207496	-0.745325	0.0529846	0.0551682	0.150951	0.0263067	0.0374158
54014	BRWD1	-0.391456	0.182529	-2.14463	0.0319826	0.475109	75.5073	16.3314	0.00260521	0.868697	-4.69536	-2.27587	-1.48374	-2.03371	0.168689	-0.967048	-0.423643	-0.313352	-0.436476	0.0377084	0.0424188	0.0346502	0.0446014	0.046062
8883	NAE1	-0.235497	0.109674	-2.14723	0.0317746	0.475109	31.1938	5.81343	0.213521	-1.79561	-1.4524	0.617583	-1.64008	-1.76026	-0.34397	-0.320868	0.0975472	-0.388997	-0.403709	0.0366958	0.0488067	0.0249482	0.0562552	0.0525996
58478	ENOPH1	-0.210443	0.0980891	-2.14543	0.0319188	0.475109	0	1.86323	0.760897	-1.10163	-1.27064	-1.76683	-0.708968	0.116733	-0.226669	-0.311758	-0.338681	-0.188036	0.0247355	0.0423363	0.0601991	0.0367444	0.0703443	0.0449006
11000	SLC27A3	0.228609	0.106489	2.14678	0.0318106	0.475109	0	3.66817	0.452772	0.239257	0.76519	1.22457	-0.146498	2.47246	0.0521578	0.188348	0.342119	-0.039413	0.504594	0.0475234	0.0605876	0.0780522	0.0723798	0.0416511
1103	CHAT	0.175292	0.0816796	2.14609	0.0318658	0.475109	0	3.00934	0.556263	-0.129985	1.26717	1.08319	1.41139	1.6814	-0.019063	0.231096	0.37222	0.213369	0.366001	0.0215078	0.0332597	0.118083	0.0228542	0.0473828
50628	GEMIN4	-0.198522	0.0925929	-2.14403	0.0320305	0.475109	0	2.3659	0.668797	-1.12575	-1.48283	0.136502	-1.20307	-1.42501	-0.212571	-0.318204	0.0242257	-0.31902	-0.311652	0.035655	0.0460501	0.0314976	0.0703159	0.0478303
2742	GLRA2	0.202902	0.0945251	2.14654	0.0318296	0.475109	0	0.970421	0.914248	0.513618	0.592012	0.892271	1.85951	0.842526	0.0988433	0.130452	0.321426	0.317134	0.17867	0.0370352	0.0485555	0.129768	0.0290861	0.0449713
5566	PRKACA	0.209302	0.0976405	2.1436	0.0320652	0.475109	0	2.04059	0.728294	1.23724	-0.0677526	0.517546	1.16806	1.86226	0.310712	-0.0191147	0.0985405	0.215248	0.422379	0.0630676	0.0795942	0.036252	0.0339582	0.0514428
3685	ITGAV	-0.22967	0.10707	-2.14503	0.0319501	0.475109	0	1.26292	0.867634	0.213793	-0.84696	-1.42135	-1.39837	-1.06082	0.0633273	-0.265382	-0.267841	-0.349727	-0.228798	0.0877391	0.0981789	0.0355098	0.062548	0.0465176
127124	ATP6V1G3	0.275911	0.128411	2.14866	0.0316616	0.475109	48.3463	7.74388	0.101424	0.830107	1.85456	0.898445	-0.183626	3.33717	0.16843	0.403427	0.326155	-0.0278931	0.589911	0.0411692	0.0473202	0.131785	0.0230742	0.0312476
1837	DTNA	0.238821	0.111601	2.13995	0.0323591	0.475621	50.4375	8.07061	0.0890255	-0.868459	0.536391	1.99369	3.03676	2.12798	-0.163964	0.105455	0.374071	0.466715	0.33681	0.0356448	0.0386518	0.0352043	0.0236201	0.0250516
25915	NDUFAF3	-0.27834	0.130056	-2.14015	0.0323425	0.475621	45.367	7.32158	0.119839	-2.56997	0.472103	-0.445344	-1.67476	-2.36485	-0.523818	0.0991406	-0.0821571	-0.530245	-0.462467	0.0415435	0.0440991	0.0340328	0.100241	0.0382431
80775	TMEM177	-0.284624	0.132995	-2.14012	0.0323451	0.475621	44.2781	7.17851	0.12675	-2.92856	0.868466	-0.86329	-1.37239	-2.09923	-0.587881	0.207981	-0.248533	-0.253479	-0.458915	0.0402968	0.0573511	0.0828811	0.0341139	0.0477906
4352	MPL	-0.254307	0.118752	-2.1415	0.0322337	0.475621	8.41673	4.36761	0.358535	-2.45522	-1.24532	-0.71099	-1.0655	0.26485	-0.608369	-0.32016	-0.183429	-0.342894	0.0567132	0.0613976	0.0660957	0.0665589	0.103565	0.0458529
57380	MRS2	0.206491	0.0964584	2.14073	0.0322962	0.475621	0	2.52319	0.640488	0.0421358	-0.394063	1.22109	1.14112	2.03853	0.0110461	-0.122554	0.255222	0.21274	0.36657	0.0687247	0.0967217	0.0436856	0.0347563	0.0323356
51156	SERPINA10	0.207463	0.096887	2.14128	0.0322512	0.475621	0	1.51362	0.824226	0.326298	1.4971	1.35438	0.924304	1.03065	0.0657931	0.336803	0.482437	0.15807	0.229881	0.0406567	0.0506113	0.126882	0.0292463	0.0497491
283130	SLC25A45	0.257009	0.11998	2.1421	0.0321853	0.475621	29.1029	5.64198	0.227528	0.789114	2.13631	1.58612	-0.480937	1.91055	0.20827	0.583686	0.417193	-0.0876823	0.35013	0.0696587	0.0746502	0.0691837	0.0332389	0.0335848
50940		0.178376	0.083287	2.14171	0.0322171	0.475621	0	2.03453	0.729408	0.986885	1.47401	-0.78716	1.08867	1.29227	0.188043	0.274664	-0.27249	0.16284	0.219137	0.036306	0.0347218	0.119833	0.0223735	0.0287558
50940	PDE11A	0.178376	0.083287	2.14171	0.0322171	0.475621	0	2.03453	0.729408	0.986885	1.47401	-0.78716	1.08867	1.29227	0.188043	0.274664	-0.27249	0.16284	0.219137	0.036306	0.0347218	0.119833	0.0223735	0.0287558
5168	ENPP2	-0.292453	0.136732	-2.13888	0.0324452	0.476417	45.4054	7.32673	0.119597	-1.11002	-1.62817	0.0217164	-0.0609195	-3.87862	-0.280567	-0.486868	0.00613724	-0.0118748	-0.59118	0.0638876	0.0894175	0.0798677	0.0379962	0.0232319
1261	CNGA3	0.180977	0.0846496	2.13795	0.0325204	0.477052	0	1.80945	0.770753	1.65409	1.28495	-0.375478	1.33109	0.283544	0.29426	0.244039	-0.113221	0.194916	0.0596424	0.0316478	0.0360699	0.0909259	0.0214428	0.0442455
64425	POLR1E	-0.219988	0.102929	-2.13728	0.0325749	0.47738	0	1.22732	0.873581	-0.338586	-1.60646	-0.804402	-0.657363	-1.42154	-0.0734112	-0.407159	-0.206451	-0.150435	-0.294657	0.0470097	0.0642379	0.0658702	0.0523702	0.0429652
123624	AGBL1	0.168709	0.0789518	2.13685	0.0326099	0.477424	0	2.43649	0.656042	1.4066	-0.198917	1.3536	1.72501	0.42033	0.256173	-0.0387255	0.27725	0.266727	0.0679811	0.0331685	0.0379007	0.0419531	0.0239084	0.0261574
4496	MT1H	0.257657	0.120625	2.13602	0.0326776	0.477946	24.6357	5.30755	0.257171	1.40787	0.955478	2.03737	2.07095	-0.585051	0.347937	0.244168	0.786946	0.330539	-0.128657	0.0610773	0.0653035	0.149193	0.0254745	0.0483596
28969	BZW2	-0.242894	0.113925	-2.13204	0.0330032	0.479883	36.271	6.27658	0.179423	-1.34315	-0.76225	-2.78878	-1.77214	0.554418	-0.247108	-0.146232	-0.488144	-0.538544	0.111307	0.0338474	0.0368033	0.0306384	0.0923523	0.0403063
57498	KIDINS220	-0.359398	0.168452	-2.13354	0.0328808	0.479883	61.1025	10.2834	0.0359144	0.192766	-0.0745085	-3.14798	-1.21486	-3.68991	0.0442541	-0.0182494	-0.51358	-0.461257	-0.826344	0.0527043	0.059991	0.0266167	0.144157	0.0501523
6908	TBP	-0.173337	0.0812741	-2.13274	0.0329457	0.479883	0	3.70718	0.447082	-1.28419	0.131593	-2.33961	-1.03258	0.222042	-0.215858	0.0295861	-0.335058	-0.260066	0.0394432	0.0282539	0.0505488	0.0205094	0.063433	0.0315555
54934	KANSL2	-0.227699	0.106789	-2.13222	0.0329886	0.479883	25.2047	5.34793	0.253424	0.195697	-1.69022	-2.58162	-1.36184	-0.204128	0.0371907	-0.327469	-0.475025	-0.429405	-0.0398735	0.0361161	0.0375367	0.0338569	0.0994225	0.0381558
25804	LSM4	-0.236472	0.110868	-2.13291	0.0329317	0.479883	26.2889	5.42659	0.246258	-1.33345	0.111701	-0.276739	-0.898656	-3.06613	-0.256865	0.025367	-0.0533738	-0.276592	-0.564135	0.0371072	0.0515734	0.0371977	0.0947307	0.0338521
94081	SFXN1	-0.237655	0.111401	-2.13334	0.0328972	0.479883	0	2.2825	0.683956	0.161122	-0.303238	-0.696481	-1.14735	-2.2168	0.0424654	-0.101483	-0.247083	-0.24028	-0.430564	0.069464	0.111999	0.125854	0.0438573	0.0377243
6885	MAP3K7	-0.1858	0.0872181	-2.1303	0.0331472	0.481313	0	2.17289	0.703996	-0.164413	-0.762738	-0.627219	-1.30237	-2.00317	-0.0387101	-0.240224	-0.0848544	-0.356291	-0.336973	0.055434	0.0991932	0.0183025	0.0748415	0.028298
56965	PARP6	-0.202822	0.0952186	-2.13007	0.0331662	0.481313	0	2.48978	0.646467	-0.217792	0.228117	-2.35408	-0.653329	-0.979271	-0.0611375	0.0847112	-0.405755	-0.115014	-0.198141	0.078801	0.137901	0.0297089	0.0309912	0.0409397
7565	ZNF17	-0.21128	0.0992285	-2.12923	0.0332355	0.481516	0	3.17778	0.528527	-0.49458	0.0109663	-2.45181	-1.12099	-0.445734	-0.100602	0.002857	-0.491031	-0.256212	-0.103396	0.0413753	0.0678737	0.0401092	0.0522393	0.0538092
996	CDC27	-0.379029	0.178054	-2.12872	0.0332771	0.481516	72.0698	14.3214	0.00633683	-0.490038	0.381988	-4.28778	-1.07569	-3.91285	-0.120198	0.106304	-0.672791	-0.182379	-0.941321	0.0601632	0.0774467	0.0246204	0.028746	0.0578747
10360	NPM3	-0.286771	0.134692	-2.12908	0.0332479	0.481516	46.4003	7.46273	0.113364	-2.41635	0.400385	-0.134099	-1.33083	-2.99155	-0.543395	0.112683	-0.0249732	-0.323884	-0.562992	0.0505724	0.0792073	0.0346812	0.0592289	0.0354171
132671	SPATA18	-0.200312	0.0941312	-2.12801	0.033336	0.481902	6.58192	4.28183	0.369206	-2.72264	-0.797537	0.361967	-0.955002	-0.344966	-0.530644	-0.173099	0.157132	-0.156613	-0.0602044	0.0379861	0.0471073	0.188448	0.0268935	0.0304581
51029	DESI2	-0.191563	0.0901793	-2.12424	0.0336499	0.482741	2.88682	4.11891	0.390153	0.621495	-1.54834	-1.3877	-1.74308	-1.00553	0.121445	-0.359785	-0.225292	-0.44488	-0.186486	0.0381841	0.0539946	0.026357	0.0651407	0.0343956
7110	TMF1	-0.215494	0.101428	-2.12461	0.033619	0.482741	0	1.27289	0.865958	-0.121151	-0.758635	-1.50494	-0.653993	-1.58244	-0.0293305	-0.2243	-0.303701	-0.136642	-0.343349	0.0586121	0.0874161	0.0407242	0.043654	0.0470781
169693	TMEM252	0.218833	0.103038	2.12382	0.0336856	0.482741	0	3.83981	0.428118	0.773446	0.044827	-0.740022	1.9505	1.84339	0.192216	0.0113142	-0.249966	0.33355	0.41915	0.0617619	0.0637038	0.114096	0.0292436	0.0517016
91614	DEPDC7	-0.269858	0.127062	-2.12382	0.0336853	0.482741	58.6862	9.682	0.0461389	-1.09847	-0.449949	-1.92457	-0.0745111	-3.98031	-0.19435	-0.0844483	-0.550857	-0.0114736	-0.596199	0.0313036	0.0352254	0.081924	0.0237113	0.0224362
29882	ANAPC2	0.216018	0.101612	2.12591	0.0335108	0.482741	3.26293	4.13492	0.388054	2.65738	0.633686	-0.410646	0.640876	0.896369	0.585878	0.178454	-0.165889	0.114794	0.161905	0.048608	0.079306	0.163192	0.0320843	0.0326249
3958	LGALS3	0.239556	0.112723	2.12518	0.0335716	0.482741	0	1.4803	0.830125	0.393847	0.960805	0.517176	0.753053	2.02086	0.0947222	0.265414	0.125223	0.227989	0.44808	0.0578427	0.0763093	0.0586259	0.0916591	0.0491631
6833	ABCC8	0.252785	0.118954	2.12506	0.0335812	0.482741	41.7412	6.86592	0.143146	0.0726076	2.46713	0.489951	3.0526	0.129083	0.0137577	0.497837	0.161553	0.496619	0.0241858	0.0359027	0.0407184	0.108724	0.026467	0.0351064
9348	NDST3	0.263333	0.123881	2.1257	0.0335284	0.482741	48.3441	7.74355	0.101437	3.67477	-0.43118	0.383943	1.90767	1.05234	0.670959	-0.110574	0.0936748	0.302156	0.190872	0.0333375	0.0657636	0.0595268	0.0250874	0.0328981
5636	PRPSAP2	-0.266279	0.125244	-2.12609	0.0334957	0.482741	37.8851	6.43967	0.168631	-0.409104	-0.241302	-1.02037	-1.26915	-3.215	-0.0778622	-0.0581563	-0.179921	-0.365563	-0.762499	0.036223	0.0580862	0.031092	0.0829658	0.0562493
56961	SHD	0.203092	0.0956878	2.12244	0.0338009	0.483928	0	2.872	0.579469	0.278186	1.74674	0.749605	1.90756	-0.218063	0.0642485	0.418336	0.193811	0.309409	-0.0486808	0.0533404	0.057358	0.0668486	0.0263092	0.0498369
515	ATP5PB	-0.232947	0.109816	-2.12124	0.0339016	0.484438	25.2729	5.35281	0.252974	-0.86259	-2.1451	0.252403	-0.968017	-2.14175	-0.186772	-0.574709	0.039365	-0.35035	-0.358251	0.046883	0.0717796	0.0243238	0.13099	0.0279794
79814	AGMAT	-0.244905	0.115434	-2.1216	0.0338714	0.484438	0	3.1474	0.533469	-2.1114	0.040245	-1.56844	-0.58028	-0.626276	-0.600182	0.0143211	-0.446822	-0.126125	-0.135747	0.0808023	0.126628	0.0811588	0.0472419	0.0469819
57217	TTC7A	0.31406	0.148419	2.11604	0.034341	0.490247	57.3141	9.37079	0.0524711	1.0239	1.54042	1.06842	-0.319927	4.11324	0.248369	0.495099	0.199589	-0.0656136	0.704892	0.0588408	0.103302	0.034897	0.0420615	0.0293682
6357	CCL13	0.282592	0.133576	2.1156	0.0343792	0.490323	41.0098	6.78079	0.147936	1.59208	-1.00438	1.61855	2.83107	1.30692	0.353976	-0.258163	0.658029	0.483555	0.24741	0.0494332	0.0660678	0.165287	0.0291736	0.0358374
27252	KLHL20	-0.21271	0.100648	-2.1134	0.0345662	0.492312	0	1.30998	0.859681	-0.0924916	-1.24294	-0.889344	-0.754925	-1.69179	-0.0236459	-0.372987	-0.192091	-0.150857	-0.33285	0.0653594	0.090051	0.0466523	0.039932	0.0387083
259217	HSPA12A	0.184467	0.0872934	2.11319	0.0345847	0.492312	3.68554	4.15306	0.385687	1.67248	0.870852	-0.530055	2.19495	0.41618	0.367548	0.182985	-0.121691	0.362755	0.0676325	0.0482952	0.0441511	0.0527078	0.0273135	0.0264087
1289	COL5A1	-0.264011	0.125019	-2.11177	0.034706	0.492711	34.3614	6.09398	0.192239	-0.0515047	-2.71775	-2.17222	0.232504	-1.09536	-0.0126357	-0.731203	-0.414073	0.0716715	-0.184447	0.0601875	0.0723864	0.036337	0.0950235	0.0283547
23203	PMPCA	-0.307649	0.145683	-2.11176	0.0347067	0.492711	60.2888	10.0727	0.0392201	-1.10854	0.726752	-4.30469	-0.636093	-2.50185	-0.199244	0.190709	-0.660937	-0.16787	-0.501697	0.0323048	0.0688606	0.0235741	0.069647	0.0402126
84436	ZNF528	0.219519	0.103973	2.11132	0.034745	0.492711	0	3.87827	0.422731	-0.820142	-0.166586	0.765371	2.24307	1.42071	-0.256047	-0.0564994	0.212826	0.341676	0.339418	0.0974677	0.11503	0.0773223	0.023203	0.0570771
80316	PPP1R2C	0.189072	0.089544	2.1115	0.0347295	0.492711	0	2.85091	0.583077	0.521464	1.7037	0.993447	1.76415	-0.188855	0.112562	0.371853	0.253857	0.295602	-0.033739	0.0465941	0.0476383	0.0652962	0.0280767	0.0319158
23632	CA14	0.190427	0.0902536	2.10991	0.0348662	0.49396	0	1.6801	0.79433	1.47454	1.1497	0.0787119	0.333144	1.58699	0.31601	0.267881	0.0228625	0.0551133	0.271451	0.0459289	0.0542894	0.0843656	0.0273683	0.0292573
54059	YBEY	-0.385427	0.182893	-2.1074	0.0350832	0.494399	64.5133	11.2718	0.023673	-4.27486	0.159199	-2.64327	-0.569455	-0.797808	-0.817562	0.0372429	-0.75882	-0.14952	-0.206621	0.0365762	0.0547276	0.0824126	0.0689411	0.067074
4241	MELTF	0.187315	0.0889041	2.10693	0.0351235	0.494399	0	3.77377	0.437488	0.998564	0.324131	2.27454	1.36197	0.286822	0.187084	0.063109	0.761142	0.217919	0.0589663	0.035101	0.0379089	0.111981	0.0256011	0.0422653
56995	TULP4	-0.319557	0.151576	-2.10823	0.0350112	0.494399	64.5058	11.2694	0.0236971	-1.1913	-0.0383311	-4.79638	-0.175373	-2.04497	-0.248296	-0.0106936	-0.762331	-0.0333078	-0.406936	0.0434406	0.0778291	0.0252615	0.0360717	0.0395983
9994	CASP8AP2	0.241876	0.11469	2.10896	0.0349484	0.494399	35.8354	6.23396	0.182344	2.5746	1.41902	0.55703	2.08314	-0.817715	0.506597	0.367871	0.104025	0.344814	-0.199861	0.0387174	0.0672065	0.0348754	0.027399	0.0597385
7454	WAS	0.215105	0.102097	2.10686	0.0351294	0.494399	0	3.13417	0.535629	0.290164	2.2844	0.714298	-0.395054	1.26653	0.0548389	0.462652	0.185422	-0.161314	0.265717	0.0357182	0.0410173	0.0673849	0.166736	0.0440159
124491	TMEM170A	-0.243019	0.115303	-2.10766	0.0350606	0.494399	42.5172	6.9586	0.138092	0.906628	-2.29422	-2.48762	-0.794466	-1.58556	0.181553	-0.518685	-0.390866	-0.187251	-0.279088	0.0401005	0.0511136	0.0246881	0.0555516	0.0309825
23133	PHF8	0.186075	0.0882587	2.10829	0.0350062	0.494399	0	3.9988	0.406169	-0.100944	1.72883	-0.19549	0.740372	2.20415	-0.0217685	0.349821	-0.0521918	0.118188	0.408052	0.0465051	0.040944	0.0712778	0.0254828	0.0342727
196996	GRAMD2A	-0.228536	0.108579	-2.1048	0.0353089	0.494624	20.3655	5.02295	0.284951	-1.90935	0.380673	-1.05089	-0.521944	-2.33318	-0.38915	0.0793711	-0.425445	-0.0925051	-0.463141	0.0415396	0.0434732	0.163898	0.0314111	0.0394031
1824	DSC2	-0.269594	0.128087	-2.10477	0.0353113	0.494624	0	1.687	0.793078	-0.929569	-0.98315	0.270324	-0.607933	-1.96054	-0.243287	-0.302347	0.0999943	-0.197353	-0.449994	0.0684975	0.0945738	0.13683	0.105384	0.052682
136263	SSMEM1	-0.206625	0.0981262	-2.10571	0.0352299	0.494624	2.51295	4.10311	0.392231	-1.06041	-0.444074	-0.295869	0.124267	-2.69989	-0.24025	-0.11312	-0.140646	0.0215139	-0.457333	0.0513313	0.0648891	0.225971	0.0299725	0.0286928
5140	PDE3B	-0.250229	0.118832	-2.10573	0.0352279	0.494624	0	0.87306	0.928394	-1.19551	-1.37687	-0.123584	-1.24794	-0.639924	-0.283489	-0.408316	-0.0448177	-0.313943	-0.149771	0.0562295	0.0879434	0.131514	0.0632871	0.054777
7561	ZNF14	-0.230208	0.109355	-2.10514	0.0352793	0.494624	0	3.47184	0.482173	-0.288284	-1.099	-2.54393	-0.322242	0.192707	-0.0667813	-0.248164	-0.495216	-0.134476	0.0529524	0.0536621	0.0509898	0.0378948	0.174151	0.0755051
9512	PMPCB	-0.260391	0.123745	-2.10425	0.0353568	0.494796	27.5031	5.51748	0.238198	0.124573	-2.84818	-1.59583	-0.867061	-0.416908	0.0275481	-0.706734	-0.310206	-0.274385	-0.0953902	0.0489034	0.0615711	0.0377857	0.100143	0.0523512
6302	TSPAN31	0.275035	0.130869	2.10161	0.0355876	0.496624	51.9678	8.32774	0.080284	-0.139802	1.99123	3.34415	-0.540632	2.13091	-0.0279764	0.370901	0.575455	-0.152926	0.420577	0.040046	0.0346956	0.0296109	0.0800124	0.038955
84879	MFSD2A	0.196635	0.0935311	2.10235	0.0355229	0.496624	0	3.34236	0.502249	-0.0358217	0.768022	0.392089	0.681169	2.55995	-0.00792432	0.184372	0.169355	0.107198	0.461372	0.0489363	0.0576294	0.186563	0.0247664	0.0324818
84128	WDR75	-0.193343	0.0920141	-2.10123	0.0356207	0.496624	7.80165	4.33847	0.362132	0.291728	0.0310309	-2.29346	-0.909316	-1.82402	0.0561787	0.00678632	-0.299124	-0.285972	-0.449145	0.0370841	0.0478277	0.0170107	0.0989052	0.0606336
4299	AFF1	-0.339241	0.161434	-2.10142	0.0356038	0.496624	52.478	8.41715	0.0774386	-0.00608959	-1.22578	-0.711698	-0.937806	-3.99471	-0.00155094	-0.384777	-0.178275	-0.21042	-0.867472	0.0648656	0.0985348	0.0627462	0.0503443	0.0471564
9648	GCC2	-0.294855	0.140413	-2.0999	0.0357372	0.497318	55.4919	8.98712	0.0614222	-0.716063	-1.64721	-1.8665	0.45065	-3.20179	-0.187421	-0.45269	-0.343012	0.0704808	-0.657874	0.0685066	0.0755272	0.0337723	0.0244604	0.0422184
2313	FLI1	0.277787	0.132265	2.10023	0.0357087	0.497318	31.1862	5.81279	0.213572	0.629822	-0.246331	1.20397	0.27694	3.4984	0.21833	-0.104966	0.303972	0.0508735	0.5956	0.120168	0.181574	0.0637436	0.0337452	0.0289849
54897	CASZ1	0.230346	0.109825	2.0974	0.0359583	0.499462	35.879	6.23821	0.182051	3.35772	1.03929	0.906131	-0.372025	0.83799	0.560315	0.209186	0.177762	-0.0765302	0.184378	0.0278469	0.040513	0.0384854	0.0423177	0.0484107
9526	MPDU1	0.20433	0.0974053	2.09773	0.0359288	0.499462	0	1.17487	0.882218	0.888066	-0.0159163	1.29281	0.401094	1.71878	0.194598	-0.00570073	0.220242	0.0901002	0.362324	0.0480159	0.128285	0.029022	0.0504614	0.044438
662	BNIP1	-0.26084	0.124447	-2.09599	0.0360828	0.500724	44.2362	7.17311	0.127018	-1.15382	-0.00812273	-0.140117	-1.20753	-3.72271	-0.281742	-0.00251162	-0.0246896	-0.229467	-0.622756	0.0596249	0.0956104	0.0310488	0.0361111	0.0279845
11325	DDX42	-0.186905	0.0892166	-2.09496	0.0361747	0.501067	0	1.96816	0.741615	-1.32808	0.125497	-1.72239	-0.764366	-1.0132	-0.243051	0.0235707	-0.341765	-0.213608	-0.187418	0.0334925	0.0352762	0.0393724	0.0780969	0.0342159
3298	HSF2	-0.33189	0.158416	-2.09506	0.0361659	0.501067	60.8645	10.2209	0.0368667	-0.168365	-1.09711	-4.61072	-0.00782958	-1.97272	-0.0397382	-0.307593	-0.745106	-0.00174703	-0.453841	0.0557076	0.0786049	0.0261155	0.0497876	0.0529269
284306	ZNF547	-0.259407	0.123975	-2.09241	0.0364019	0.502346	39.3414	6.59428	0.158946	-1.11938	0.0321958	-1.81035	-0.27929	-2.91455	-0.23281	0.00782874	-0.449774	-0.0466699	-0.670775	0.0432564	0.0591271	0.0617252	0.027923	0.0529675
81615	TMEM163	-0.241479	0.115405	-2.09245	0.0363986	0.502346	14.0248	4.6525	0.324845	-0.45591	-2.40159	-1.54245	-0.326023	-0.974994	-0.102804	-0.660338	-0.621153	-0.0578969	-0.219538	0.0508467	0.0756021	0.162172	0.0315366	0.0507011
2324	FLT4	0.184391	0.0881182	2.09255	0.0363896	0.502346	2.17049	4.08875	0.394129	-0.414679	2.32312	0.531101	1.43353	0.824422	-0.0879634	0.537276	0.131387	0.212321	0.152111	0.0449967	0.0534875	0.0611995	0.0219367	0.0340424
85397	RGS8	0.184267	0.0880292	2.09324	0.0363275	0.502346	0	3.80372	0.433221	1.34434	-0.0522344	-0.453409	2.26964	1.00923	0.265223	-0.0114093	-0.10209	0.35528	0.21586	0.0389227	0.0477097	0.0506974	0.0245035	0.0457476
119548	PNLIPRP3	0.167903	0.0802629	2.09191	0.0364469	0.502502	0	3.87607	0.423037	1.24379	2.24328	1.15518	0.559082	-0.160585	0.207068	0.38633	0.420877	0.091454	-0.0252256	0.027716	0.0296585	0.132742	0.0267581	0.0246759
9792	SERTAD2	-0.275334	0.131822	-2.08867	0.0367371	0.503388	33.7919	6.04155	0.196066	-0.650646	-1.46145	0.156127	-1.02768	-2.90368	-0.14438	-0.336546	0.0306845	-0.35873	-0.710945	0.0492409	0.0530299	0.0386263	0.121848	0.0599479
140467	ZNF358	-0.206557	0.098867	-2.08924	0.0366864	0.503388	0	0.692571	0.952242	-0.591414	-0.64053	-1.58577	-0.483968	-1.2444	-0.136964	-0.148745	-0.321073	-0.114182	-0.260855	0.0536328	0.0539271	0.0409948	0.0556623	0.0439416
131669	UROC1	-0.198413	0.0949664	-2.0893	0.0366807	0.503388	0	2.77228	0.596628	-1.68291	-0.427248	-0.878299	-0.0681477	-1.82939	-0.35758	-0.102205	-0.369363	-0.01121	-0.341805	0.0451465	0.0572245	0.176856	0.0270587	0.0349095
63905	MANBAL	-0.184526	0.0883844	-2.08776	0.0368191	0.503388	0	0.739302	0.946395	-1.62028	-0.252686	-1.17337	-0.685482	-0.749811	-0.280649	-0.0530967	-0.207522	-0.158886	-0.161901	0.0300018	0.0441541	0.0312791	0.0537254	0.0466227
54567	DLL4	0.209569	0.100259	2.09028	0.0365928	0.503388	21.4625	5.09311	0.277877	1.52798	2.75423	-0.0518095	0.789304	0.240051	0.285891	0.595003	-0.015747	0.134251	0.040569	0.0350077	0.0466701	0.0923801	0.02893	0.0285616
81831	NETO2	0.248447	0.118927	2.08908	0.0367006	0.503388	0	2.51567	0.641832	0.89248	-0.331317	0.130204	1.08576	2.18582	0.292134	-0.125797	0.0431703	0.21825	0.481733	0.107144	0.144164	0.109932	0.0404055	0.0485718
930	CD19	0.316983	0.151801	2.08815	0.0367847	0.503388	34.547	6.11126	0.190992	0.445998	1.93912	0.551222	-0.489625	3.18601	0.120842	0.569153	0.174642	-0.158865	0.638512	0.0734127	0.0861486	0.100379	0.105276	0.0401647
29124	LGALS13	-0.253342	0.121344	-2.0878	0.036816	0.503388	0	2.61564	0.624054	-0.254512	-1.90792	-1.14705	-1.36313	-0.309415	-0.0789546	-0.64153	-0.343645	-0.341269	-0.0666025	0.0962364	0.113061	0.0897537	0.0626785	0.0463339
4321	MMP12	0.238815	0.114406	2.08743	0.0368489	0.503388	32.659	5.93992	0.203681	1.41595	0.889694	2.05421	2.31242	-0.551819	0.259318	0.184421	0.833122	0.377704	-0.111954	0.0335406	0.0429675	0.164485	0.0266789	0.0411607
80020	FOXRED2	-0.413728	0.1981	-2.08848	0.0367542	0.503388	77.1584	17.5119	0.00153678	-1.73626	-0.440779	-3.05595	0.337094	-4.7825	-0.390913	-0.117362	-0.720846	0.0560354	-0.896256	0.0506913	0.0708942	0.0556406	0.0276326	0.03512
3112	HLA-DOB	0.250896	0.120266	2.08617	0.0369631	0.504024	0	3.18103	0.528	1.05384	1.99729	0.23499	-0.187681	1.53067	0.272923	0.604678	0.0663687	-0.0527455	0.359587	0.0670708	0.0916572	0.0797675	0.0789828	0.0551878
85360	SYDE1	-0.198079	0.0949322	-2.08653	0.0369308	0.504024	0	2.0861	0.719926	0.248643	-0.946682	-1.38962	-0.983816	-1.60709	0.0524416	-0.212816	-0.312222	-0.196105	-0.330002	0.0444836	0.050536	0.0504818	0.0397327	0.0421651
54680	ZNHIT6	-0.210286	0.100846	-2.08521	0.0370505	0.504494	16.1473	4.77027	0.311692	-2.73854	0.212312	-1.21208	-1.06149	-0.198065	-0.559681	0.0508158	-0.176659	-0.281937	-0.0449266	0.0417678	0.057286	0.0212427	0.070546	0.0514507
55844	PPP2R2D	-0.190088	0.0911671	-2.08504	0.0370653	0.504494	0	3.69992	0.448137	0.413716	-1.66592	-0.870329	-0.804902	-1.92238	0.090512	-0.373149	-0.14552	-0.156314	-0.463439	0.0478639	0.0501716	0.0279563	0.0377145	0.0581171
25880	TMEM186	-0.19695	0.0944804	-2.08456	0.0371093	0.504632	3.85101	4.16021	0.384758	-0.688929	-0.106096	-1.70822	0.236415	-2.29247	-0.17848	-0.0313304	-0.294866	0.0417577	-0.45534	0.0671169	0.0872031	0.0297964	0.0311977	0.0394515
6036	RNASE2	0.336841	0.161618	2.08418	0.037144	0.504643	0	2.52807	0.639616	0.788559	0.267849	2.09747	0.144028	1.32596	0.264215	0.0952082	0.769157	0.0578649	0.473845	0.112265	0.126348	0.134474	0.161413	0.127706
8448	DOC2A	0.194764	0.093467	2.08377	0.0371809	0.504685	0	1.31752	0.858397	1.73186	0.49093	0.585637	1.41154	0.289546	0.358186	0.101724	0.246368	0.227748	0.0594321	0.042775	0.0429347	0.176975	0.026033	0.0421316
11019	LIAS	-0.211506	0.101581	-2.08215	0.0373283	0.505306	15.215	4.71782	0.317495	-0.0774519	-1.28005	-2.75175	-0.234038	-0.769107	-0.0145735	-0.357301	-0.51571	-0.0469322	-0.167267	0.0354051	0.0779139	0.035123	0.0402132	0.0472984
49855	SCAPER	-0.218031	0.104683	-2.08278	0.0372716	0.505306	14.3736	4.67145	0.322699	0.264017	-0.0690876	-2.43914	-1.18524	-1.53762	0.0583777	-0.0159277	-0.534057	-0.244537	-0.320172	0.0488912	0.0531501	0.0479405	0.0425674	0.043358
9969	MED13	-0.178147	0.0855512	-2.08235	0.0373107	0.505306	1.72021	4.07001	0.396614	-0.818756	-1.0565	-1.61201	0.616141	-1.92877	-0.194172	-0.283464	-0.256455	0.102896	-0.338899	0.0562427	0.0719868	0.0253095	0.0278895	0.0308732
131566	DCBLD2	-0.187644	0.0901426	-2.08164	0.0373754	0.505484	0	2.82914	0.586813	-0.968735	-1.80936	-1.65409	-0.224512	-0.404601	-0.267128	-0.530973	-0.276455	-0.0401691	-0.0723595	0.0760376	0.0861179	0.0279337	0.0320115	0.0319843
23304	UBR2	-0.343169	0.165184	-2.0775	0.0377554	0.507915	58.8547	9.72165	0.0453867	0.681817	-3.11424	-1.58969	-0.808905	-2.32029	0.125969	-0.671934	-0.401321	-0.247555	-0.580081	0.0341342	0.0465531	0.0637317	0.0936589	0.0625022
55971	BAIAP2L1	-0.379036	0.182391	-2.07815	0.0376955	0.507915	74.2738	15.5484	0.00368914	-0.0302289	-3.97114	0.0972346	-1.14976	-4.55811	-0.00614617	-0.809986	0.0267174	-0.233828	-0.769084	0.0413394	0.0416031	0.0754998	0.04136	0.0284694
64342	HS1BP3	0.30667	0.147608	2.07761	0.0377457	0.507915	49.4031	7.90561	0.0950975	1.24408	3.05931	2.02186	-0.836031	1.03505	0.291767	0.724777	0.484651	-0.218745	0.213361	0.0550019	0.0561258	0.0574589	0.068459	0.0424921
4254	KITLG	0.160022	0.0770174	2.07774	0.037733	0.507915	0	3.22609	0.520727	0.113946	1.64219	-0.549704	0.634356	2.03193	0.0194722	0.260662	-0.163712	0.106011	0.2946	0.0292036	0.0251946	0.0886953	0.027928	0.0210207
83737	ITCH	-0.196937	0.0947974	-2.07745	0.0377596	0.507915	0	2.92093	0.571143	-1.5238	0.505608	-1.75087	-0.366077	-1.20813	-0.310384	0.121951	-0.382717	-0.0976466	-0.204207	0.0414899	0.058176	0.0477802	0.071149	0.02857
9698	PUM1	-0.191842	0.0923318	-2.07774	0.0377329	0.507915	0	2.91445	0.572243	-0.522968	-1.20658	-2.19622	-0.808954	0.155948	-0.0900478	-0.260631	-0.386881	-0.303355	0.0326582	0.029648	0.046659	0.0310315	0.140622	0.0438555
4361	MRE11	-0.244511	0.11778	-2.07599	0.0378945	0.508082	25.8731	5.39615	0.24901	-0.29114	-1.49056	-1.07067	0.0750271	-2.73636	-0.0772049	-0.419486	-0.27275	0.0127589	-0.551781	0.0703211	0.0792022	0.0648957	0.0289196	0.0406619
5471	PPAT	-0.204841	0.098727	-2.07482	0.0380029	0.508082	0	0.379583	0.984114	-0.621378	-0.591751	-0.929496	-1.41956	-1.03396	-0.126126	-0.158893	-0.211568	-0.297239	-0.218738	0.0412002	0.0720995	0.0518091	0.0438433	0.0447549
5641	LGMN	-0.204732	0.0986483	-2.07538	0.0379516	0.508082	0	2.93838	0.56819	-0.561351	0.10605	-2.09424	-1.07769	-1.1713	-0.112047	0.0242057	-0.525683	-0.22335	-0.266537	0.0398408	0.0520974	0.0630078	0.042952	0.0517823
7798	LUZP1	-0.21454	0.103458	-2.07369	0.0381083	0.508082	0	1.14325	0.887351	-1.47163	-0.72778	-1.39609	-0.881392	-0.148839	-0.322218	-0.171025	-0.303745	-0.248087	-0.032705	0.0479405	0.0552228	0.0473358	0.0792262	0.0482828
2802	GOLGA3	-0.184847	0.0891315	-2.07387	0.0380915	0.508082	0	2.57979	0.630407	-0.981634	0.258034	-2.21629	-0.821844	-0.51298	-0.160403	0.0532955	-0.345905	-0.304943	-0.125657	0.0267008	0.0426607	0.024359	0.137676	0.0600034
6283	S100A12	0.32254	0.155595	2.07295	0.0381773	0.508082	0	1.13884	0.888062	1.47225	0.39811	1.30479	0.187217	1.17149	0.445482	0.157528	0.746699	0.0906665	0.286846	0.0915575	0.156571	0.327497	0.234533	0.0599546
8001	GLRA3	0.19559	0.0942021	2.07628	0.0378682	0.508082	18.472	4.90629	0.297049	0.40324	2.57826	-0.98507	1.27543	1.1301	0.0746267	0.465949	-0.379454	0.208859	0.179814	0.03425	0.0326607	0.148383	0.0268161	0.0253168
10081	PDCD7	-0.201399	0.0971581	-2.0729	0.0381812	0.508082	0	0.242535	0.993215	-0.579843	-0.813316	-1.20768	-0.485934	-1.35909	-0.122731	-0.205962	-0.203918	-0.192097	-0.263777	0.044801	0.0641294	0.0285105	0.156274	0.0376683
10392	NOD1	0.32711	0.15752	2.07663	0.0378355	0.508082	62.7483	10.7378	0.0296746	-0.556146	0.746525	2.39657	1.17182	3.92086	-0.118297	0.189668	0.480932	0.246317	0.796907	0.0452451	0.0645507	0.0402705	0.0441841	0.0413097
284001	CCDC57	0.190059	0.091685	2.07296	0.0381764	0.508082	0	3.39803	0.493551	0.154123	1.42164	0.922733	0.193116	2.18212	0.047214	0.506176	0.155252	0.0315021	0.416025	0.0938436	0.126772	0.0283089	0.0266098	0.0363482
4666	NACA	-0.1903	0.0917709	-2.07364	0.0381125	0.508082	0	1.24885	0.869993	-1.84554	-0.836295	-0.466316	-0.748636	-0.815796	-0.339287	-0.213089	-0.0791377	-0.304026	-0.142091	0.0337977	0.0649236	0.0288009	0.164922	0.030337
3276	PRMT1	-0.204157	0.0984496	-2.07372	0.0381055	0.508082	0	3.5387	0.472019	-2.42851	-0.226276	-0.346137	-1.30951	-0.235585	-0.470519	-0.0720014	-0.0664864	-0.356212	-0.0461663	0.0375381	0.101252	0.0368952	0.0739949	0.038402
23409	SIRT4	-0.228617	0.110352	-2.0717	0.0382935	0.508415	8.09692	4.35241	0.360408	0.936882	-1.30889	-0.831305	-1.8902	-1.52748	0.238989	-0.41021	-0.2172	-0.347893	-0.334936	0.0650709	0.0982209	0.0682651	0.0338747	0.048081
1997	ELF1	-0.263846	0.12741	-2.07084	0.0383738	0.508415	38.8564	6.54197	0.162165	0.308779	-2.39252	-0.371708	-0.861038	-2.72598	0.069839	-0.600068	-0.0665027	-0.323725	-0.456858	0.0511563	0.0629059	0.0320092	0.141354	0.0280877
54815	GATAD2A	-0.249457	0.12041	-2.07172	0.0382914	0.508415	44.502	7.20746	0.125323	-3.06121	0.204658	-2.2595	-1.29614	0.0725895	-0.473273	0.0353801	-0.408937	-0.428589	0.0166912	0.0239023	0.0298856	0.0327559	0.109339	0.0528725
55279	ZNF654	-0.319389	0.154259	-2.07047	0.038408	0.508415	52.742	8.46417	0.0759808	-0.457451	-2.63443	0.200068	-0.910364	-2.97953	-0.126807	-0.794113	0.0437449	-0.178786	-0.644261	0.0768423	0.0908641	0.0478077	0.0385687	0.0467549
1869	E2F1	0.220155	0.106332	2.07044	0.0384109	0.508415	0	2.01978	0.732121	0.493171	0.790067	-0.483072	1.77751	1.43045	0.119989	0.22751	-0.159036	0.314019	0.335082	0.0591954	0.0829226	0.108385	0.0312095	0.054873
3052	HCCS	0.262576	0.126764	2.07138	0.0383234	0.508415	33.0012	5.97025	0.201381	1.55496	1.07814	3.21442	-0.388499	0.217316	0.431138	0.313216	0.505524	-0.0811994	0.0606161	0.0768768	0.0843995	0.024733	0.0436844	0.077802
1759	DNM1	0.251078	0.121292	2.07004	0.0384487	0.508464	38.7684	6.53257	0.16275	2.25964	1.58961	-0.532822	2.63207	-0.0861549	0.486644	0.399517	-0.148054	0.412093	-0.0167734	0.0463813	0.0631666	0.0772103	0.0245129	0.0379036
2785	GNG3	0.228058	0.110263	2.0683	0.0386121	0.510173	0	1.74139	0.783187	0.912255	-0.178791	0.141815	2.13733	0.752849	0.243002	-0.0584771	0.0540488	0.374633	0.171032	0.0709559	0.106975	0.145253	0.0307234	0.0516104
10476	ATP5PD	-0.191802	0.0928167	-2.06646	0.038785	0.510708	0	2.82573	0.5874	-2.12519	0.100893	-1.23503	-0.986867	-0.264923	-0.395239	0.0215571	-0.206655	-0.363274	-0.0562713	0.0345879	0.0456517	0.0279988	0.135504	0.0451164
64376	IKZF5	-0.221262	0.107076	-2.06641	0.0387897	0.510708	0	3.51496	0.475608	-0.22374	-0.255421	-0.264454	-0.75745	-2.65067	-0.0568489	-0.0831207	-0.0641964	-0.165316	-0.537436	0.0645589	0.105902	0.058928	0.0476345	0.0411096
729	C6	0.196473	0.0950316	2.06745	0.038692	0.510708	0	3.50301	0.477421	-0.554661	1.541	0.577493	2.1366	0.443235	-0.137019	0.355453	0.145912	0.354294	0.0914017	0.0610253	0.053206	0.0638394	0.0274967	0.0425246
84814	PLPP7	0.281584	0.136262	2.06649	0.0387821	0.510708	48.4589	7.76079	0.100744	2.10585	-1.32755	2.03538	2.53004	1.06771	0.490009	-0.361368	0.432866	0.448049	0.229777	0.0541445	0.0740967	0.0452289	0.0313616	0.0463139
10240	MRPS31	-0.184524	0.0894083	-2.06384	0.0390332	0.512212	0	3.56192	0.468526	-0.371049	-0.551387	-0.538088	-1.25343	-2.34926	-0.0724819	-0.138996	-0.0760249	-0.37715	-0.500711	0.038159	0.0635465	0.019962	0.0905374	0.0454268
51592	TRIM33	-0.294251	0.142581	-2.06375	0.0390414	0.512212	63.5391	10.9706	0.0268959	-0.687165	-0.696018	-4.59999	-1.09094	-0.670952	-0.111262	-0.130156	-0.775874	-0.315095	-0.127491	0.0262164	0.0349692	0.0284491	0.0834221	0.0361055
10908	PNPLA6	0.20254	0.0981346	2.0639	0.0390274	0.512212	0	2.40297	0.662091	1.25686	1.7605	1.06309	-0.51992	0.763625	0.288653	0.408698	0.215609	-0.167627	0.134172	0.0527443	0.0538933	0.0411337	0.103947	0.0308718
57121	LPAR5	-0.23435	0.11353	-2.06422	0.0389972	0.512212	0	2.33339	0.674696	-1.62713	-0.140069	-1.39517	-1.40054	-0.138526	-0.364089	-0.0397929	-0.436064	-0.36829	-0.0305767	0.0500694	0.0807102	0.0976884	0.0691493	0.0487211
25862	USP49	-0.234457	0.113639	-2.06317	0.0390962	0.51248	0	3.6407	0.45681	0.0646975	-0.0632736	-0.333339	-0.384565	-2.76228	0.0183209	-0.0199263	-0.0844769	-0.155607	-0.479363	0.0801896	0.0991769	0.064225	0.163726	0.0301158
522	ATP5PF	-0.194426	0.0945121	-2.05716	0.039671	0.512572	0	2.34017	0.673465	-2.03168	-0.0655177	-0.503808	-0.973955	-1.1125	-0.45312	-0.017757	-0.0853609	-0.326079	-0.189469	0.0497414	0.0734548	0.028707	0.11209	0.0290054
11031	RAB31	0.226667	0.110103	2.05868	0.0395251	0.512572	0	2.87371	0.579178	2.08825	0.856009	0.175454	-0.436375	1.34057	0.420664	0.222562	0.0378018	-0.178943	0.339801	0.0405796	0.0675995	0.0464193	0.168155	0.0642493
6733	SRPK2	-0.211255	0.102658	-2.05787	0.039603	0.512572	10.8719	4.48792	0.343982	-2.32924	-1.28684	0.0165541	-1.44664	-0.0299878	-0.511851	-0.379331	0.00337656	-0.283059	-0.00600582	0.0482901	0.0868931	0.0416044	0.0382856	0.0401104
285282	RABL3	-0.214416	0.103982	-2.06206	0.0392019	0.512572	0	2.85262	0.582783	-0.844707	-0.339354	-2.40577	-0.434618	-0.547184	-0.220772	-0.130273	-0.534443	-0.0799949	-0.118612	0.0683089	0.147367	0.0493508	0.0338774	0.0469881
7728	ZNF175	-0.235612	0.114287	-2.06158	0.0392476	0.512572	0	2.9365	0.568507	0.310797	-0.395429	-2.2146	-0.893627	-1.10933	0.0875521	-0.137837	-0.51806	-0.18941	-0.284575	0.0793556	0.121505	0.0547227	0.0449253	0.0658069
3598	IL13RA2	0.250871	0.121944	2.05726	0.0396616	0.512572	45.385	7.32399	0.119726	2.24085	2.09472	-1.36436	0.945175	2.13434	0.435571	0.493572	-0.419695	0.155171	0.337769	0.0377824	0.0555198	0.0946259	0.0269522	0.0250446
26005	C2CD3	-0.202278	0.0981747	-2.06038	0.0393618	0.512572	0	2.23968	0.691772	-0.9343	0.217865	-0.663641	-0.835372	-2.10386	-0.225295	0.0632268	-0.188304	-0.135661	-0.42641	0.0581474	0.0842224	0.0805107	0.0263726	0.0410792
9495	AKAP5	-0.202498	0.0982279	-2.06151	0.0392547	0.512572	1.20351	4.04873	0.399452	-0.018145	-1.87577	-2.08692	-0.491797	-0.471494	-0.00391243	-0.481696	-0.478917	-0.086567	-0.11403	0.0464921	0.0659459	0.0526632	0.0309836	0.0584903
1236	CCR7	-0.302476	0.147029	-2.05726	0.0396615	0.512572	19.0544	4.94159	0.293343	-1.91438	-2.14105	0.597836	-1.37696	0.134164	-0.456499	-0.560498	0.336419	-0.507137	0.0321008	0.0568623	0.0685323	0.316663	0.135646	0.0572483
4160	MC4R	0.184811	0.0898225	2.05752	0.0396363	0.512572	0	3.98237	0.408398	1.55348	1.70846	-1.03085	1.27122	0.452718	0.316744	0.330502	-0.301779	0.208805	0.0915821	0.0415727	0.037423	0.0857008	0.0269798	0.0409229
541468	LURAP1	0.181962	0.0883456	2.05966	0.0394307	0.512572	0	1.96497	0.742202	0.206073	0.62357	0.197147	0.852022	2.23854	0.0494771	0.163973	0.0462348	0.135185	0.361199	0.0576457	0.0691469	0.0549995	0.0251741	0.0260353
57449	PLEKHG5	0.26191	0.12728	2.05774	0.039615	0.512572	62.3844	10.6339	0.0310018	-0.670141	2.0199	2.40847	0.726306	2.8171	-0.0973384	0.358693	0.530854	0.11152	0.536592	0.0210977	0.0315347	0.0485809	0.023576	0.0362814
147945	NLRP4	0.192663	0.0936629	2.05698	0.0396878	0.512572	0	3.51473	0.475642	-0.390723	1.51459	-0.310896	1.84495	1.34119	-0.0814183	0.368404	-0.114383	0.312774	0.237554	0.0434216	0.0591642	0.13536	0.0287404	0.0313722
8994	LIMD1	0.197286	0.0957406	2.06063	0.0393388	0.512572	0	3.96076	0.411342	0.395318	-0.151722	0.483348	1.07254	2.57753	0.080481	-0.0357037	0.170038	0.18018	0.532875	0.0414469	0.0553773	0.123758	0.028222	0.0427407
9939	RBM8A	-0.240409	0.116867	-2.05711	0.0396756	0.512572	48.0844	7.70481	0.10301	-0.145093	-0.622276	-0.648935	-1.11403	-3.84223	-0.0385578	-0.180945	-0.0864689	-0.180488	-0.627209	0.0706211	0.0845528	0.0177549	0.0262482	0.0266476
60496	AASDHPPT	-0.216713	0.105157	-2.06085	0.0393171	0.512572	0	0.768508	0.942619	-0.19468	-0.577033	-1.39108	-1.44475	-0.788889	-0.0520773	-0.201994	-0.283307	-0.31806	-0.162548	0.0715574	0.12254	0.0414773	0.0484656	0.0424553
3441	IFNA4	0.17762	0.0861764	2.06112	0.0392913	0.512572	0	2.7221	0.605353	1.79441	1.48254	-0.151084	1.23096	-0.120082	0.347092	0.287154	-0.0416568	0.186402	-0.0242558	0.037415	0.037516	0.0760214	0.0229307	0.0408017
1392	CRH	-0.222036	0.107994	-2.056	0.039782	0.512899	0	2.64515	0.618846	0.460907	-0.680794	-0.766388	-1.20198	-2.04066	0.109719	-0.207769	-0.331527	-0.277066	-0.354183	0.056668	0.0931384	0.187129	0.0531342	0.030124
79796	ALG9	-0.223429	0.108655	-2.05631	0.039753	0.512899	23.0719	5.19966	0.267418	-0.686273	-2.26995	-1.98077	-0.882144	0.494347	-0.129243	-0.517508	-0.433965	-0.193377	0.10653	0.0354668	0.0519758	0.0479999	0.0480543	0.0464384
91433	RCCD1	-0.197101	0.0959004	-2.05526	0.0398537	0.513379	21.3717	5.08722	0.278464	0.677515	-1.71616	-2.09341	-0.682447	-1.46188	0.134995	-0.399021	-0.390105	-0.108577	-0.275694	0.0397007	0.0540599	0.0347258	0.0253127	0.0355659
83452	RAB33B	0.26231	0.127699	2.05412	0.0399639	0.514354	0	3.08939	0.54298	0.389319	0.710506	0.11184	0.00889009	2.57679	0.119312	0.299838	0.0391499	0.0025351	0.51951	0.0939197	0.17809	0.122536	0.0813164	0.0406472
51311	TLR8	-0.261533	0.127424	-2.05246	0.0401245	0.514971	0	0.406857	0.981912	-1.43318	-0.757095	-0.23993	-0.579206	-1.26461	-0.346298	-0.220095	-0.0886395	-0.211675	-0.299625	0.0583849	0.0845118	0.136485	0.133559	0.0561365
4826	NNAT	-0.239941	0.116967	-2.05135	0.0402327	0.514971	21.4722	5.09374	0.277814	-2.02736	-0.164506	-1.15784	0.31747	-2.20513	-0.412396	-0.0346949	-0.317944	0.0745095	-0.551605	0.0413778	0.0444803	0.0754057	0.055083	0.0625734
10915	TCERG1	-0.263008	0.128226	-2.05114	0.0402537	0.514971	50.4406	8.07112	0.0890073	-0.816494	-3.52025	-0.177258	-0.250443	-1.76656	-0.17341	-0.772266	-0.0365333	-0.0488203	-0.318007	0.0451069	0.0481267	0.0424783	0.0379999	0.0324051
6876	TAGLN	0.209962	0.102283	2.05276	0.0400963	0.514971	0	2.16149	0.706085	0.777248	1.76531	0.0189692	0.6717	1.48436	0.164839	0.427818	0.00379994	0.219791	0.315987	0.0449779	0.0587321	0.0401286	0.10707	0.0453171
155038	GIMAP8	-0.235166	0.114643	-2.0513	0.0402378	0.514971	0	0.938177	0.919021	-1.28399	-0.183355	-1.38089	-1.09506	-0.598136	-0.240307	-0.0587267	-0.39307	-0.384565	-0.14364	0.0350279	0.102586	0.0810259	0.123329	0.0576705
1783	DYNC1LI2	0.379659	0.185044	2.05172	0.0401966	0.514971	75.0546	16.035	0.00297255	0.878347	3.93113	0.641497	-0.506008	4.63003	0.175265	0.780702	0.108266	-0.181286	0.812566	0.039816	0.0394398	0.0284838	0.128355	0.0307999
9861	PSMD6	-0.198679	0.0968537	-2.05133	0.0402351	0.514971	7.72743	4.33498	0.362565	-0.409504	-2.27113	0.492168	-0.895961	-1.61332	-0.0766482	-0.455991	0.107515	-0.291867	-0.280389	0.0350338	0.0403114	0.047721	0.106119	0.030205
26257	NKX2-8	0.187988	0.0916668	2.05078	0.0402886	0.514975	0	2.20437	0.69823	1.4084	-0.163274	1.76708	1.06199	0.38653	0.321742	-0.0445688	0.362714	0.185396	0.0707143	0.0521871	0.0745123	0.0421322	0.030476	0.0334694
2915	GRM5	0.335173	0.163605	2.04867	0.0404942	0.516834	61.6987	10.4435	0.033584	-0.0628218	-0.038557	2.86455	4.13344	0.794449	-0.0159881	-0.0115172	0.629704	0.732693	0.165337	0.0647697	0.0892253	0.0483236	0.0314211	0.043312
9980	DOPEY2	0.231837	0.11317	2.04858	0.0405034	0.516834	0	1.40505	0.843317	0.473563	1.32119	0.484881	0.210353	1.831	0.105877	0.323991	0.138772	0.0709202	0.405001	0.0499864	0.0601357	0.0819095	0.113669	0.0489256
6091	ROBO1	0.277773	0.13565	2.04772	0.0405871	0.517018	47.5156	7.62131	0.106477	3.44941	-0.0424328	-0.462388	2.1281	1.17272	0.682476	-0.00947508	-0.156001	0.356093	0.261442	0.0391457	0.0498613	0.113827	0.0279991	0.0497009
3169	FOXA1	0.1821	0.0889207	2.04789	0.0405708	0.517018	0	1.93206	0.748254	0.597408	1.68767	0.387405	1.66156	0.0995912	0.114236	0.370641	0.104005	0.268881	0.019409	0.0365652	0.0482317	0.0720742	0.0261872	0.037981
57578	UNC79	0.240326	0.11748	2.04569	0.0407873	0.518239	47.2933	7.58916	0.107841	0.889948	1.52437	0.12842	0.0331771	3.78031	0.186437	0.336262	0.0350322	0.00503532	0.540256	0.0438869	0.0486603	0.0744169	0.0230344	0.0204242
8766	RAB11A	-0.23097	0.112875	-2.04625	0.040732	0.518239	32.5976	5.93451	0.204093	-0.356949	-0.133518	-0.484752	-1.19744	-3.45533	-0.0634964	-0.0293016	-0.106289	-0.434243	-0.512859	0.0316436	0.0481619	0.0480768	0.13151	0.0220301
79666	PLEKHF2	-0.211866	0.103561	-2.04581	0.0407755	0.518239	0	2.13561	0.710833	-0.227872	-0.23028	-1.3924	-0.435805	-2.0217	-0.0691241	-0.0862207	-0.266508	-0.0806912	-0.466591	0.0920187	0.140189	0.0366344	0.0342821	0.0532648
3787	KCNS1	0.296908	0.1452	2.04482	0.0408729	0.518884	51.4604	8.2407	0.0831486	2.69878	2.09782	-0.553247	2.58409	-0.3705	0.588194	0.527239	-0.257564	0.39665	-0.0698402	0.0475016	0.0631655	0.216736	0.0235612	0.0355333
55651	NHP2	-0.193562	0.0946999	-2.04396	0.0409579	0.51952	0	3.12234	0.537565	-1.39218	0.501236	-2.00775	-0.141299	-1.0294	-0.289991	0.11923	-0.347035	-0.0362377	-0.218919	0.0433888	0.0565832	0.0298764	0.0657717	0.0452266
27156	RSPH14	-0.188078	0.0920331	-2.04359	0.040994	0.519536	0	1.71378	0.788213	-0.113197	0.00905754	-1.10339	-1.68018	-1.35525	-0.0256283	0.00215022	-0.245866	-0.266416	-0.296468	0.051259	0.0563569	0.0496524	0.0251427	0.0478543
9736	USP34	-0.207832	0.101726	-2.04306	0.0410466	0.519761	0	0.480925	0.975331	-0.509876	-0.766954	-1.23712	-1.18528	-0.933534	-0.113948	-0.233087	-0.2546	-0.336629	-0.171071	0.0499445	0.0923629	0.042354	0.080661	0.033581
262	AMD1	-0.382462	0.18727	-2.0423	0.0411217	0.519828	67.2028	12.1962	0.0159507	-0.835209	-1.43596	-5.44229	-1.04099	0.0471845	-0.255098	-0.523921	-0.822601	-0.26598	0.00954776	0.0932878	0.133122	0.0228463	0.0652835	0.0409453
4940	OAS3	0.211859	0.103717	2.04265	0.0410869	0.519828	0	3.53375	0.472766	1.16811	1.61987	-1.05926	0.993059	1.26866	0.264836	0.329986	-0.331067	0.219532	0.293306	0.0514025	0.0414984	0.0976837	0.0488703	0.0534503
22937	SCAP	-0.231765	0.113574	-2.04065	0.041286	0.520141	31.5844	5.84662	0.2109	-0.2429	-2.63501	-1.99317	-0.982884	0.11756	-0.0552352	-0.648476	-0.301454	-0.315828	0.0204376	0.0517101	0.0605654	0.0228746	0.103252	0.030223
342945	ZSCAN22	-0.426834	0.20915	-2.0408	0.0412709	0.520141	79.2858	19.3104	0.000682908	-0.209911	-2.52739	-1.62171	-0.155383	-5.34115	-0.0441143	-0.560249	-0.453583	-0.0268497	-1.07279	0.0441661	0.0491382	0.0782291	0.0298588	0.0403421
5196	PF4	0.197094	0.0965641	2.04107	0.0412436	0.520141	0	1.60375	0.808118	0.835014	1.23497	1.16823	1.47047	-0.142473	0.161394	0.297275	0.571512	0.219812	-0.0376932	0.0373584	0.0579435	0.239328	0.0223456	0.0699935
55194	EVA1B	0.271665	0.133121	2.04073	0.0412772	0.520141	33.2393	5.99155	0.19978	0.519471	2.0958	-0.0668771	0.177611	2.87837	0.145165	0.621108	-0.0159304	0.042763	0.539949	0.0780914	0.087828	0.056741	0.0579687	0.0351894
10992	SF3B2	-0.193827	0.0950128	-2.04001	0.0413491	0.520195	0	1.52221	0.8227	-0.927749	-1.97028	-0.0592172	-0.636031	-0.730126	-0.156794	-0.383335	-0.0155468	-0.208667	-0.144458	0.0285626	0.037853	0.0689264	0.107634	0.0391458
3815	KIT	-0.378722	0.185657	-2.0399	0.0413601	0.520195	63.0291	10.8193	0.0286715	-0.211457	-4.2194	-1.42198	-0.749661	-0.845035	-0.0588379	-1.08636	-0.459572	-0.156753	-0.184202	0.0774231	0.0662898	0.104453	0.0437219	0.0475161
7570	ZNF22	-0.199492	0.0978202	-2.03938	0.0414125	0.520414	0	1.70315	0.790145	-0.953283	-1.28639	-0.703694	-1.66534	-0.173522	-0.175811	-0.295227	-0.126594	-0.503641	-0.0459067	0.0340132	0.0526704	0.0323636	0.0914609	0.0699914
441549	CDNF	0.206471	0.101288	2.03846	0.0415036	0.520478	0	3.92319	0.416501	0.0158115	1.19165	-0.893008	2.26434	0.856468	0.00383024	0.279263	-0.349395	0.384665	0.186716	0.0586819	0.0549201	0.153082	0.028859	0.0475269
23635	SSBP2	-0.199059	0.0976774	-2.03793	0.0415572	0.520478	0	3.33507	0.503395	-1.20755	-0.497688	-1.8282	-1.4779	0.505813	-0.265335	-0.125367	-0.342338	-0.360633	0.105407	0.0482816	0.0634527	0.0350642	0.059544	0.0434269
140699	MROH8	0.211191	0.103616	2.0382	0.0415297	0.520478	22.8416	5.18414	0.26892	1.24353	2.72492	-0.669131	0.155736	1.27718	0.231774	0.528236	-0.234271	0.0300489	0.217987	0.0347389	0.0375794	0.122579	0.037229	0.0291309
66005	CHID1	-0.371396	0.182196	-2.03845	0.0415054	0.520478	71.3445	13.9589	0.00742731	-3.11667	-1.44105	-1.7977	1.10421	-2.91345	-0.72927	-0.350857	-0.402646	0.193889	-0.649358	0.0547512	0.0592794	0.050166	0.0308321	0.0496767
5229	PGGT1B	-0.207173	0.101689	-2.03731	0.0416188	0.520812	0	2.2212	0.69515	-0.999594	0.392234	-0.607619	-1.0238	-1.94972	-0.248756	0.122289	-0.141562	-0.185526	-0.421529	0.0619297	0.0972037	0.0542791	0.0328378	0.0467422
1200	TPP1	0.219993	0.10803	2.0364	0.0417101	0.521516	20.0242	5.00152	0.287142	1.21249	1.67512	2.52123	-0.584269	-0.374478	0.247971	0.359085	0.405639	-0.227908	-0.081122	0.0418259	0.0459518	0.0258853	0.152158	0.0469274
336	APOA2	0.217244	0.106715	2.03573	0.041777	0.521915	0	0.87389	0.928277	1.4142	0.0861853	0.622827	1.02892	1.25065	0.356604	0.0261974	0.199745	0.176685	0.297899	0.0635849	0.0923954	0.102853	0.0294873	0.0567368
25849	PARM1	0.256314	0.125934	2.03531	0.0418198	0.521931	33.0811	5.97738	0.200844	0.571696	1.52839	0.987742	3.10379	-0.616011	0.148007	0.464326	0.236671	0.504821	-0.140251	0.067025	0.0922951	0.0574119	0.026454	0.0518363
9662	CEP135	-0.193816	0.0952872	-2.03402	0.0419498	0.521931	0	3.16519	0.530571	0.078603	0.265713	-2.16595	-1.00682	-1.23313	0.0161494	0.0707604	-0.345376	-0.287692	-0.270584	0.0422118	0.0709175	0.0254265	0.0816493	0.0481488
7386	UQCRFS1	-0.177453	0.0872404	-2.03407	0.0419447	0.521931	0	2.98643	0.560099	-1.34324	-1.24686	0.226348	-0.782144	-1.76123	-0.221532	-0.224922	0.0365932	-0.290992	-0.410478	0.0271999	0.0325407	0.0261364	0.138417	0.0543185
148641	SLC35F3	-0.218148	0.107241	-2.03418	0.0419336	0.521931	37.9956	6.45115	0.167894	-2.24455	-2.40632	0.139803	0.528411	-1.66574	-0.360315	-0.457484	0.0389134	0.0938579	-0.285351	0.0257696	0.0361446	0.0774758	0.0315499	0.0293457
3417	IDH1	0.202136	0.0993796	2.03398	0.0419534	0.521931	0	3.66137	0.45377	1.93105	0.357269	0.357783	-0.516954	1.88324	0.373456	0.09225	0.0849366	-0.130856	0.36816	0.0374017	0.0666718	0.0563574	0.0640741	0.0382174
6304	SATB1	-0.216987	0.106715	-2.03334	0.0420186	0.522306	0	0.527363	0.970783	-1.17218	-1.1169	-1.0393	-0.719991	-0.664698	-0.308215	-0.369634	-0.222867	-0.159458	-0.141446	0.0691384	0.109525	0.0459847	0.0490501	0.0452828
196527	ANO6	-0.341377	0.168	-2.032	0.0421532	0.522425	64.4025	11.2367	0.0240284	-1.80992	-0.621195	-3.91564	-2.13789	0.741813	-0.375302	-0.179615	-0.702155	-0.590172	0.147486	0.0429975	0.0836044	0.0321559	0.0762053	0.0395286
90864	SPSB3	-0.18979	0.0934257	-2.03146	0.0422084	0.522425	0	3.17816	0.528465	-0.108524	-1.38288	-1.86047	-1.34903	0.315656	-0.0235085	-0.245964	-0.337109	-0.395876	0.0713409	0.0469241	0.0316353	0.0328319	0.0861141	0.0510799
10194	TSHZ1	-0.203543	0.100297	-2.02941	0.0424165	0.522425	2.33758	4.09574	0.393204	-0.615359	-0.331923	-2.54377	-1.15061	0.246217	-0.132997	-0.083058	-0.474274	-0.317273	0.0516743	0.046712	0.0626163	0.0347619	0.0760341	0.0440466
2635	GBP3	0.271449	0.133759	2.02939	0.0424189	0.522425	21.3526	5.08599	0.278587	0.861876	-0.287495	2.40579	0.556225	1.7841	0.235661	-0.0932866	0.804879	0.106489	0.458679	0.0747626	0.105288	0.11193	0.0366528	0.0660965
285193	DUSP28	-0.319208	0.157122	-2.03159	0.0421951	0.522425	68.8805	12.8537	0.0120133	-3.46191	0.75337	-4.0706	-1.30132	-0.458758	-0.573119	0.164936	-0.688828	-0.300971	-0.0954825	0.0274069	0.0479306	0.0286355	0.0534914	0.0433192
4878	NPPA	0.19986	0.0984972	2.02909	0.0424488	0.522425	0	2.00395	0.735032	0.631614	1.49728	-0.0144063	1.78607	0.538656	0.152286	0.41683	-0.00318398	0.309465	0.122969	0.0581325	0.0775018	0.0488472	0.0300212	0.0521158
5768	QSOX1	0.212891	0.104832	2.03078	0.0422776	0.522425	1.69429	4.06894	0.396756	1.77263	0.295633	1.1662	-0.656946	1.80709	0.485141	0.0913984	0.20166	-0.168576	0.399079	0.0749032	0.0955811	0.0299015	0.0658461	0.0487708
9904	RBM19	0.295124	0.145277	2.03145	0.042209	0.522425	62.4321	10.6474	0.030826	0.0625377	1.10266	3.98948	0.0248994	2.28635	0.0157339	0.28311	0.671285	0.00374891	0.459554	0.0632975	0.0659217	0.0283127	0.022669	0.0404005
9902	MRC2	-0.232289	0.114403	-2.03044	0.0423121	0.522425	0	1.15827	0.88492	-0.0754461	-1.19239	-1.46921	-1.10897	-0.681953	-0.021938	-0.397159	-0.371747	-0.234744	-0.162431	0.0845516	0.11094	0.0640216	0.0448075	0.0567323
51603	METTL13	-0.171092	0.0843058	-2.02943	0.0424149	0.522425	0	1.29123	0.862862	-0.996211	0.351403	-1.00757	-0.989117	-1.51668	-0.16589	0.101317	-0.152094	-0.248994	-0.26427	0.0277291	0.0831283	0.0227862	0.0633696	0.0303604
79848	CSPP1	-0.329134	0.162044	-2.03114	0.0422407	0.522425	64.6016	11.2999	0.0233921	-0.818037	-0.742786	-0.733274	-0.719954	-4.80323	-0.162037	-0.187777	-0.158416	-0.167845	-0.898523	0.0392356	0.0639084	0.0466727	0.0543509	0.0349938
201475	RAB12	-0.190264	0.0937444	-2.0296	0.0423972	0.522425	0	1.65936	0.798086	0.293016	-1.22975	-1.41498	-0.679235	-1.31032	0.0756053	-0.356061	-0.260535	-0.136157	-0.229987	0.0665767	0.0838324	0.0339025	0.0401828	0.0308071
53834	FGFRL1	0.244922	0.12079	2.02766	0.0425947	0.523356	19.5809	4.97394	0.289981	2.61552	0.850029	-0.116251	0.0737379	1.60346	0.61174	0.251081	-0.0287932	0.0165618	0.358759	0.0547039	0.0872486	0.0613465	0.050447	0.0500601
832	CAPZB	0.200416	0.0988382	2.02772	0.0425892	0.523356	0	2.04102	0.728215	1.16409	0.674066	0.972363	-0.608071	1.7401	0.295601	0.173279	0.177686	-0.196308	0.306735	0.0644818	0.0660826	0.0333927	0.104224	0.0310727
131965	METTL6	0.195653	0.0965359	2.02674	0.0426892	0.523378	0	1.85887	0.761696	0.785169	0.764068	0.788607	2.03524	0.0464655	0.219092	0.233115	0.188504	0.341774	0.00837836	0.0778624	0.0930845	0.0571375	0.0282	0.032513
9188	DDX21	-0.223733	0.110453	-2.02559	0.0428071	0.523378	0	3.3197	0.505817	-1.33944	-0.41587	0.320243	-0.860194	-2.14783	-0.294511	-0.117189	0.0717213	-0.300542	-0.473669	0.0483457	0.0794075	0.0501577	0.122073	0.0486351
83893	SPATA16	0.191289	0.0944033	2.0263	0.0427343	0.523378	0	1.7431	0.782875	-0.0502397	0.828373	0.0578601	1.37341	1.8085	-0.0119755	0.203946	0.0165575	0.227612	0.333024	0.0568189	0.060615	0.0818901	0.0274657	0.033909
7771	ZNF112	-0.22854	0.112781	-2.02641	0.0427228	0.523378	13.6007	4.62967	0.327448	0.596186	-0.8421	-1.45701	-0.52709	-2.46969	0.168808	-0.287128	-0.279138	-0.103854	-0.564586	0.0801724	0.116258	0.0367038	0.0388221	0.052261
7485	WRB	-0.201132	0.099294	-2.02562	0.0428034	0.523378	0	3.51619	0.475422	0.262716	-0.0544151	-0.25844	-1.62932	-2.19679	0.0678833	-0.018896	-0.0519308	-0.358825	-0.383741	0.0667655	0.120588	0.0403767	0.0485008	0.0305142
22834	ZNF652	-0.240109	0.11852	-2.02589	0.0427756	0.523378	13.5079	4.6247	0.328016	-0.703105	-0.104257	-3.0807	-0.320527	-0.115022	-0.192153	-0.0335071	-0.540803	-0.129932	-0.0229542	0.0746886	0.103291	0.0308161	0.164325	0.0398252
6155	RPL27	-0.276905	0.136737	-2.02509	0.0428578	0.523567	47.9226	7.68087	0.103993	-3.55466	0.144813	-0.786809	-0.958235	-1.25968	-0.667274	0.0333424	-0.109151	-0.408038	-0.314298	0.0352381	0.0530129	0.0192449	0.181325	0.0622535
51020	HDDC2	-0.203504	0.100585	-2.0232	0.0430522	0.523984	5.452	4.23066	0.375689	-0.339177	-1.98202	-1.81888	-0.993501	0.512034	-0.0627198	-0.439921	-0.334955	-0.331989	0.122379	0.0341945	0.0492645	0.0339128	0.111663	0.057124
8027	STAM	-0.327035	0.161636	-2.02328	0.0430447	0.523984	56.7192	9.24198	0.0553277	0.962772	-1.10806	-3.99702	-1.26894	-1.83276	0.232644	-0.316255	-0.631353	-0.332067	-0.502275	0.0583898	0.0814602	0.0249501	0.0684806	0.0751056
65010	SLC26A6	0.206074	0.101831	2.02368	0.0430027	0.523984	4.80453	4.20188	0.379373	1.55032	-0.111203	2.14034	-0.0544902	1.21692	0.350097	-0.0262811	0.47778	-0.0106679	0.288745	0.0509957	0.0558541	0.0498297	0.0383283	0.0562992
160518	DENND5B	-0.223086	0.110245	-2.02356	0.0430157	0.523984	10.9014	4.48941	0.343805	0.0631458	0.02227	-2.92445	-1.09655	0.00647552	0.0202967	0.00824703	-0.49675	-0.217117	0.00149856	0.103315	0.137137	0.0288527	0.039204	0.0535546
3248	HPGD	-0.296512	0.146567	-2.02305	0.0430676	0.523984	22.2543	5.14498	0.272742	-0.0586867	-2.59728	0.352713	-1.16704	-1.54355	-0.0165856	-0.799212	0.127142	-0.322762	-0.375539	0.0798698	0.094686	0.129938	0.0764881	0.0591929
5575	PRKAR1B	-0.212232	0.105016	-2.02094	0.0432856	0.525349	0	1.58557	0.811383	-1.65017	-0.164141	-1.18906	-0.431404	-1.14882	-0.520678	-0.0711113	-0.277882	-0.08337	-0.208994	0.0995589	0.18769	0.0546148	0.0373466	0.033095
254042	METAP1D	-0.261009	0.12914	-2.02113	0.0432664	0.525349	39.4241	6.60329	0.158398	-0.645506	-2.68882	-1.87341	0.027004	-0.910041	-0.161706	-0.739616	-0.548477	0.00481154	-0.157043	0.0627554	0.0756639	0.0857135	0.0317477	0.0297795
408263	FNDC9	0.202142	0.0999984	2.02145	0.0432331	0.525349	13.1633	4.60635	0.330123	0.78299	0.861524	1.75546	2.12573	-0.708263	0.175685	0.20116	0.425805	0.3501	-0.14245	0.0503452	0.0545189	0.0588358	0.027125	0.0404518
26112	CCDC69	0.313743	0.155482	2.01788	0.0436041	0.527559	53.4477	8.59248	0.0721331	1.41968	0.564215	2.56681	-0.832271	2.96973	0.410186	0.184043	0.521129	-0.175446	0.586053	0.08348	0.106402	0.0412193	0.0444384	0.038944
126282	TNFAIP8L1	-0.244405	0.121187	-2.01675	0.0437218	0.527559	7.20279	4.31047	0.365615	-1.65486	-0.832671	0.736993	-0.981661	-1.94887	-0.508278	-0.26341	0.186983	-0.241459	-0.423118	0.0943363	0.100073	0.0643693	0.0605011	0.0471365
337867	UBAC2	-0.244403	0.121225	-2.01611	0.0437885	0.527559	40.578	6.73152	0.150775	-0.165171	-3.08452	0.0804786	-1.60567	-1.12248	-0.0389024	-0.660277	0.0159566	-0.39164	-0.188237	0.0554731	0.0458222	0.0393113	0.0594923	0.0281225
2967	GTF2H3	-0.289566	0.143619	-2.01621	0.043778	0.527559	52.7089	8.45825	0.0761628	-0.0605335	-1.36226	-0.647851	-0.713009	-3.82013	-0.0171701	-0.42636	-0.10291	-0.146587	-0.74853	0.0804556	0.0979562	0.025233	0.0422667	0.0383939
7175	TPR	-0.184534	0.0914431	-2.01802	0.0435895	0.527559	0	2.45015	0.653583	-1.72537	-0.11194	-0.278075	-0.766762	-1.69348	-0.317195	-0.0234286	-0.0478991	-0.225538	-0.361759	0.0337979	0.0438051	0.0296708	0.0865203	0.0456331
10876	EDDM3A	0.204273	0.101282	2.01688	0.0437076	0.527559	13.6139	4.63038	0.327367	-0.765492	1.41937	2.15946	1.49002	0.357468	-0.203174	0.41577	0.432081	0.232211	0.0723515	0.0704458	0.0858049	0.0400349	0.0242874	0.0409657
10670	RRAGA	-0.215786	0.107072	-2.01533	0.0438702	0.527559	28.3289	5.58105	0.232697	-0.771974	0.863388	-2.55595	-1.01475	-1.84126	-0.143104	0.183793	-0.36666	-0.356735	-0.384381	0.0343638	0.0453156	0.0205789	0.123586	0.0435807
4711	NDUFB5	-0.188868	0.0935771	-2.01832	0.0435583	0.527559	0	2.82241	0.587971	-0.657607	-0.212307	-0.559347	-0.828198	-2.32803	-0.125223	-0.0521349	-0.0909611	-0.294999	-0.471862	0.0362603	0.0603017	0.0264453	0.126874	0.0410823
84272	YIPF4	-0.196004	0.0972168	-2.01615	0.0437842	0.527559	0	1.71591	0.787826	0.162306	-0.343884	-1.38635	-1.04822	-1.61723	0.0384107	-0.0850203	-0.25899	-0.273184	-0.304456	0.0560061	0.0611255	0.0348994	0.0679212	0.0354409
339231	ARL16	-0.209858	0.104122	-2.0155	0.0438524	0.527559	0	3.99821	0.406248	0.234271	-0.528212	-2.75074	-0.2846	-0.281003	0.0599987	-0.163944	-0.46009	-0.108117	-0.057434	0.0655915	0.0963332	0.027976	0.144318	0.0417749
55033	FKBP14	-0.231843	0.115052	-2.01512	0.0438925	0.527559	0	3.58657	0.464839	0.277398	0.370654	-2.16028	-0.402855	-1.61363	0.0897416	0.114462	-0.464385	-0.168223	-0.304241	0.10466	0.0953644	0.0462099	0.174371	0.0355489
6729	SRP54	-0.236882	0.11748	-2.01635	0.043763	0.527559	44.2412	7.17375	0.126986	0.40447	-0.449724	-2.70941	-0.782799	-2.53599	0.0659104	-0.0908069	-0.45297	-0.254417	-0.461699	0.0265543	0.0407704	0.0279504	0.105631	0.0331454
5947	RBP1	-0.198297	0.0984349	-2.0145	0.0439566	0.527905	0	3.98588	0.40792	-0.462026	-0.399672	-1.66863	0.561095	-2.13817	-0.0981567	-0.0895181	-0.382515	0.149864	-0.403582	0.0451344	0.0501665	0.0525505	0.0713377	0.0356272
54207	KCNK10	0.163366	0.0811121	2.01407	0.0440018	0.528022	0	2.63686	0.620308	2.08316	-0.157163	1.28381	0.592043	0.574831	0.326139	-0.0323888	0.302731	0.0895824	0.112757	0.0245111	0.0424704	0.0556046	0.0228949	0.0384776
57818	G6PC2	0.30816	0.153066	2.01326	0.0440878	0.528203	69.108	12.9483	0.0115309	1.31856	4.26344	1.49445	1.81441	-0.77552	0.225784	0.814967	0.399491	0.276409	-0.151527	0.0293216	0.0365394	0.0714579	0.0232077	0.0381764
92912	UBE2Q2	-0.182168	0.090473	-2.01351	0.0440613	0.528203	0	1.81902	0.769001	-0.625484	-0.458042	-2.12348	-0.838875	0.243514	-0.129846	-0.113529	-0.29136	-0.239987	0.0584608	0.0430947	0.0614334	0.0188261	0.081843	0.0576345
84717	HDGFL2	-0.180476	0.08972	-2.01154	0.0442683	0.529064	0	2.05153	0.726282	-1.63693	0.465922	-0.873123	-1.11753	-1.09087	-0.296667	0.115333	-0.146811	-0.269396	-0.218677	0.0328456	0.0612748	0.0282726	0.0581119	0.0401849
64755	C16orf58	-0.226646	0.112691	-2.01123	0.0443016	0.529064	31.7301	5.8591	0.209921	-0.941021	-3.00627	-0.838136	-0.957954	0.211458	-0.196821	-0.600238	-0.156807	-0.286905	0.0380557	0.0437464	0.039865	0.0350027	0.0896989	0.0323886
94059	LENG9	0.184274	0.091582	2.01212	0.0442075	0.529064	10.7781	4.4832	0.344544	-0.29212	-0.444385	1.15462	2.11215	1.80207	-0.0623054	-0.0992824	0.262493	0.327034	0.317242	0.0454912	0.0499143	0.0516847	0.0239738	0.0309911
5458	POU4F2	0.202259	0.100565	2.01123	0.0443016	0.529064	21.5331	5.09769	0.27742	1.08469	2.68119	-0.0241624	1.42667	-0.147355	0.192579	0.605241	-0.0073992	0.219595	-0.0284664	0.0315218	0.0509568	0.0937754	0.0236918	0.0373197
9940	DLEC1	0.186015	0.0925073	2.01082	0.044345	0.529157	1.2415	4.05028	0.399243	1.98728	0.0459239	0.221156	0.0171582	2.03756	0.41067	0.0118134	0.0779372	0.00270926	0.359717	0.042704	0.0661723	0.124192	0.0249319	0.0311674
4642	MYO1D	0.194249	0.0966286	2.01027	0.0444031	0.529426	0	3.995	0.406682	0.652816	-0.513442	2.29067	1.2554	0.723326	0.175533	-0.11887	0.521373	0.227869	0.144792	0.0723	0.0535995	0.0518052	0.0329463	0.0400704
146223	CMTM4	-0.170185	0.0846829	-2.00967	0.0444659	0.529752	0	0.925599	0.92086	-0.378313	-0.475051	-1.30649	-0.922062	-1.42775	-0.0747796	-0.09822	-0.233839	-0.148525	-0.313785	0.0390718	0.0427484	0.0320348	0.0259464	0.0483015
858	CAV2	-0.2167	0.107855	-2.00918	0.0445183	0.529953	31.3612	5.82761	0.212398	-1.71844	0.293537	-1.38707	0.478309	-2.88099	-0.378126	0.0799188	-0.280642	0.0988468	-0.399612	0.0484175	0.0741265	0.0409362	0.0427079	0.0192395
26476	OR10J1	0.187677	0.0934608	2.00808	0.0446344	0.53059	0	2.55102	0.635525	0.160054	1.34562	1.75002	0.50139	1.19715	0.0384086	0.321298	0.580569	0.0812287	0.210346	0.0575871	0.0570129	0.110058	0.0262463	0.0308725
55635	DEPDC1	0.196451	0.097834	2.008	0.0446431	0.53059	0	2.14658	0.70882	1.29836	0.713343	0.667375	1.7489	-0.69283	0.265587	0.195169	0.170752	0.272375	-0.211658	0.0418427	0.0748556	0.0654622	0.0242553	0.093329
340156	MYLK4	-0.19293	0.0961266	-2.00704	0.0447456	0.53077	0.49859	4.02004	0.4033	-1.55078	-1.87381	-1.39873	0.332447	-0.282803	-0.312774	-0.412269	-0.356018	0.0590292	-0.0697914	0.040678	0.0484072	0.0647856	0.0315275	0.0609027
1192	CLIC1	0.207196	0.103279	2.00618	0.044837	0.53077	29.3668	5.66306	0.225764	1.0731	0.149924	0.896387	-0.231602	3.13322	0.177181	0.0274871	0.144067	-0.0974079	0.571765	0.0272621	0.0336136	0.0258306	0.176891	0.0333007
153090	DAB2IP	-0.189795	0.0946205	-2.00585	0.0448718	0.53077	27.8318	5.54261	0.236009	-1.6046	-2.98369	-0.000454254	-0.125408	-0.37762	-0.272543	-0.465279	-0.00010832	-0.0188314	-0.080721	0.0288494	0.0243176	0.0568617	0.0225485	0.0456944
9422	ZNF264	-0.216346	0.107838	-2.00622	0.0448328	0.53077	0	0.538264	0.969671	-0.390676	-1.12206	-1.39437	-0.449937	-1.00241	-0.10087	-0.342245	-0.257737	-0.124496	-0.236844	0.0666641	0.0930341	0.0341664	0.0765611	0.0558255
196	AHR	-0.211944	0.105598	-2.00709	0.0447397	0.53077	0	1.11789	0.891424	-0.463195	-0.922027	-1.89467	-0.341576	-0.612505	-0.140295	-0.290932	-0.35346	-0.14521	-0.104328	0.0917391	0.0995623	0.0348026	0.180724	0.0290124
8354	HIST1H3I	0.208767	0.104056	2.0063	0.0448238	0.53077	0	1.19219	0.879382	-0.142153	1.10015	0.896062	1.73352	0.422964	-0.0404213	0.312408	0.237944	0.27323	0.116626	0.0808552	0.0806376	0.0705135	0.0248428	0.0760291
6926	TBX3	-0.292243	0.145763	-2.00492	0.0449713	0.531525	63.0324	10.8203	0.0286598	-0.871275	0.531634	-3.40579	-0.862203	-2.7657	-0.159065	0.128269	-0.878386	-0.138321	-0.483753	0.0333302	0.0582127	0.0665175	0.0257368	0.030594
126375	ZNF792	-0.197302	0.0984336	-2.00441	0.0450256	0.531745	0	3.30201	0.508614	-0.700051	0.47132	-1.56384	-0.919228	-1.82124	-0.146977	0.103164	-0.359479	-0.204353	-0.402341	0.0440797	0.0479097	0.0528401	0.0494216	0.0488038
11178	LZTS1	0.200822	0.100236	2.00348	0.0451255	0.532502	0	0.911622	0.922888	1.31523	0.368179	0.965552	1.45262	0.133369	0.277116	0.0883097	0.298423	0.245847	0.0353418	0.0443938	0.0575306	0.0955244	0.0286435	0.070221
4969	OGN	0.167288	0.0835367	2.00257	0.0452237	0.532986	0	3.96381	0.410925	1.19738	1.18187	-1.16707	0.765175	1.78774	0.184548	0.208064	-0.371879	0.12712	0.373941	0.0237549	0.0309923	0.101534	0.0276	0.0437518
4689	NCF4	0.231433	0.115577	2.00242	0.0452397	0.532986	0	3.7628	0.439057	0.908296	0.863171	-0.341819	0.110668	2.46441	0.183295	0.228969	-0.101206	0.0425979	0.58188	0.0407235	0.0703658	0.0876642	0.148161	0.0557493
290	ANPEP	0.25684	0.128285	2.0021	0.0452738	0.532986	0	2.26136	0.687812	0.0342467	1.80279	1.37101	0.0806284	1.06414	0.00939343	0.505472	0.445964	0.0320343	0.244348	0.0752333	0.0786149	0.105808	0.157854	0.0527258
6171	RPL41	-0.205019	0.102437	-2.00141	0.0453479	0.533284	6.27524	4.26782	0.370973	-0.760656	-0.184144	-2.75835	-0.737565	0.275252	-0.173045	-0.0477439	-0.437388	-0.31336	0.0554911	0.0517534	0.0672232	0.025144	0.180504	0.0406429
375567	VWC2	-0.182371	0.0911455	-2.00088	0.0454057	0.533284	0	3.93956	0.414247	-0.988955	0.0232133	-2.45887	0.032815	-0.957788	-0.252814	0.00681571	-0.459881	0.00552443	-0.176045	0.0653505	0.0862084	0.0349798	0.0283419	0.0337839
30837	SOCS7	0.176549	0.0882507	2.00054	0.0454422	0.533284	0	2.12895	0.712055	1.06363	-0.284835	1.68121	0.450036	1.37465	0.227476	-0.0790047	0.322012	0.0716311	0.265498	0.0457389	0.0769343	0.0366859	0.0253343	0.0373027
1958	EGR1	-0.386308	0.193087	-2.0007	0.045425	0.533284	26.6974	5.45684	0.24355	-0.0990085	-0.0685601	-0.867116	-0.522663	-3.39638	-0.0327098	-0.0302932	-0.346214	-0.269505	-0.885417	0.109147	0.19523	0.159417	0.265883	0.0679615
27089	UQCRQ	-0.207328	0.103832	-1.99676	0.0458511	0.5336	1.66518	4.06774	0.396916	-1.42213	1.01192	-1.87116	-0.366901	-1.22115	-0.304495	0.267513	-0.334147	-0.133848	-0.275209	0.0458438	0.0698873	0.0318901	0.133085	0.0507911
57689	LRRC4C	0.189142	0.0946413	1.99851	0.0456613	0.5336	0	3.18408	0.527506	0.358001	2.04808	-0.254869	0.455798	1.60706	0.0814455	0.485617	-0.101558	0.073059	0.296808	0.0517567	0.0562204	0.15878	0.0256923	0.0341106
92345	NAF1	-0.3485	0.174405	-1.99823	0.045692	0.5336	63.2816	10.8937	0.0277849	-0.993951	-0.261915	-1.52034	-0.265513	-4.47046	-0.25809	-0.0749191	-0.425961	-0.0496441	-0.876299	0.0674237	0.0818211	0.0784979	0.0349595	0.0384237
10675	CSPG5	-0.239626	0.120012	-1.99668	0.04586	0.5336	35.6224	6.21334	0.183772	0.242187	-1.5003	-1.33421	-0.394543	-2.78525	0.0511861	-0.3076	-0.483283	-0.0647192	-0.575925	0.0446688	0.0420356	0.131207	0.0269078	0.0427568
23063	WAPL	-0.192113	0.096307	-1.9948	0.0460648	0.5336	0	2.46021	0.651775	-0.391463	-0.659821	-0.00355141	-1.26209	-2.06348	-0.0924419	-0.198769	-0.000644642	-0.338019	-0.35094	0.0557642	0.09075	0.0329485	0.0717299	0.0289246
8993	PGLYRP1	0.348731	0.174955	1.99326	0.0462324	0.5336	0	1.21729	0.875244	1.29826	0.554171	1.49321	0.163555	0.970265	0.421909	0.223683	0.789114	0.0736025	0.331919	0.105613	0.162922	0.27928	0.202516	0.117026
51654	CDK5RAP1	-0.223856	0.112098	-1.99697	0.0458285	0.5336	41.0932	6.79039	0.147388	-3.37568	-1.20476	-0.418463	-0.602061	-0.233238	-0.626378	-0.260961	-0.0679295	-0.13621	-0.0425971	0.034431	0.0469194	0.0263513	0.0511842	0.0333549
167465	ZNF366	-0.309575	0.1548	-1.99984	0.0455176	0.5336	46.0071	7.40838	0.115818	-0.183918	-1.90441	-1.38505	0.199607	-2.97776	-0.0548642	-0.601	-0.525146	0.0355458	-0.563941	0.0889878	0.0995926	0.143757	0.0317121	0.0358663
1512	CTSH	0.227165	0.113894	1.99454	0.0460931	0.5336	0	2.06467	0.723866	0.315293	1.1978	1.71053	-0.106268	1.25361	0.0728157	0.298763	0.535729	-0.0381145	0.254308	0.053336	0.0622139	0.0980914	0.128641	0.0411524
84988	PPP1R16A	-0.315396	0.158173	-1.994	0.0461524	0.5336	62.7529	10.7391	0.0296582	0.781813	-0.8809	-3.3607	-0.30412	-4.05633	0.237038	-0.30186	-0.550217	-0.0597715	-0.648548	0.0919239	0.117424	0.0268045	0.0386277	0.0255633
9275	BCL7B	0.183292	0.0917537	1.99765	0.0457547	0.5336	0	2.0244	0.731271	0.943713	1.06678	1.25821	-0.493831	1.4695	0.1939	0.360712	0.22042	-0.119149	0.242947	0.0422158	0.114333	0.0306899	0.0582131	0.0273329
498	ATP5F1A	-0.180158	0.0902851	-1.99544	0.0459954	0.5336	0	2.91428	0.572271	-0.955736	-0.778608	-2.21998	-0.656524	0.130633	-0.161742	-0.181876	-0.404078	-0.257758	0.0228219	0.0286399	0.0545651	0.033131	0.154142	0.0305208
57002	YAE1D1	-0.220125	0.110427	-1.99339	0.0462187	0.5336	0	3.15135	0.532825	0.66552	-0.276523	-2.07478	-1.43456	-0.492844	0.199338	-0.101497	-0.404764	-0.287425	-0.140805	0.0897134	0.134725	0.0380592	0.0401432	0.0816239
8405	SPOP	-0.252418	0.126536	-1.99483	0.046061	0.5336	45.1557	7.29337	0.121174	-0.367506	-2.02959	0.462315	-1.17757	-2.98482	-0.0666115	-0.407302	0.0940723	-0.378041	-0.548307	0.0328527	0.0402732	0.0414045	0.103064	0.0337452
27115	PDE7B	-0.211461	0.106086	-1.9933	0.0462284	0.5336	0	0.964428	0.915141	-0.942724	-0.163179	-1.3274	-0.591751	-1.38208	-0.261566	-0.0452735	-0.315414	-0.119704	-0.303583	0.0769825	0.0769767	0.0564619	0.0409202	0.0482487
10874	NMU	0.206389	0.103555	1.99304	0.0462568	0.5336	5.59904	4.23725	0.374849	1.92388	0.931025	1.14057	1.45897	-0.695635	0.457997	0.219884	0.424186	0.242989	-0.150283	0.0566723	0.0557781	0.138314	0.0277383	0.0466721
26747	NUFIP1	-0.228318	0.114515	-1.99378	0.0461765	0.5336	24.703	5.31229	0.256728	-1.20138	-1.265	-2.36396	0.179677	-0.976893	-0.266169	-0.329331	-0.668534	0.0274938	-0.234967	0.0490855	0.0677767	0.0799771	0.0234143	0.0578522
10424	PGRMC2	-0.19463	0.0973378	-1.99953	0.045551	0.5336	0	2.53019	0.639239	0.0649536	-0.437574	-1.6167	-0.24559	-1.91274	0.0137	-0.0952677	-0.285232	-0.0883085	-0.40679	0.0444874	0.0474011	0.0311267	0.129296	0.0452302
4741	NEFM	-0.190893	0.0955292	-1.99827	0.0456872	0.5336	0	2.30124	0.680543	0.156491	-1.60218	-0.73233	-0.809776	-1.58455	0.0340169	-0.393095	-0.278507	-0.130845	-0.307304	0.0472506	0.0601964	0.14463	0.0261087	0.0376118
57830	KRTAP5-8	0.178579	0.0895591	1.99398	0.0461546	0.5336	0	2.44919	0.653757	0.877695	1.57793	1.6469	0.478431	0.473007	0.15891	0.375956	0.506237	0.075626	0.0928565	0.0327806	0.0567673	0.0944868	0.0249864	0.0385379
147929	ZNF565	-0.24563	0.123211	-1.99357	0.0461992	0.5336	47.734	7.65316	0.105142	-0.332103	-0.586784	-4.01724	-0.593397	-0.681199	-0.0766069	-0.14715	-0.639268	-0.104293	-0.136993	0.0532095	0.0628873	0.0253228	0.0308902	0.0404438
9205	ZMYM5	-0.209619	0.105126	-1.99398	0.0461542	0.5336	0	2.81899	0.58856	-1.51706	-0.804265	-1.73899	-0.885856	0.19445	-0.420068	-0.295828	-0.38374	-0.178656	0.0389452	0.0766712	0.135295	0.0486947	0.0406731	0.0401138
55686	MREG	-0.191197	0.0959861	-1.99192	0.0463796	0.534603	0.977696	4.03949	0.400687	-1.5494	-1.13299	-0.315923	0.293358	-2.03997	-0.350091	-0.288114	-0.121243	0.0459878	-0.38925	0.0510547	0.0646662	0.147282	0.0245747	0.036409
79411	GLB1L	-0.202309	0.101626	-1.99072	0.0465112	0.535706	0	3.16213	0.531069	-0.531654	-1.45502	-1.12214	0.229326	-1.84759	-0.14204	-0.377397	-0.259762	0.0427616	-0.407765	0.0713779	0.0672757	0.0535872	0.0347699	0.048709
255738	PCSK9	0.1859	0.0934261	1.98981	0.046612	0.536452	0	3.585	0.465072	0.505524	-0.72195	0.206141	2.17794	1.40772	0.109326	-0.175104	0.0807087	0.347389	0.255492	0.0467693	0.0588274	0.153289	0.0254415	0.0329401
26147	PHF19	0.203076	0.102134	1.98833	0.0467755	0.537918	30.9296	5.79119	0.215294	1.61127	-0.674572	0.945962	0.40757	2.82649	0.316588	-0.180881	0.142011	0.0776121	0.499486	0.0386057	0.0718998	0.0225372	0.0362621	0.0312287
635	BHMT	-0.259023	0.130364	-1.98692	0.0469316	0.538882	64.1025	11.1428	0.0250048	-1.8132	-0.990727	-1.40846	0.658651	-3.77001	-0.305409	-0.16892	-0.263011	0.106578	-0.70879	0.0283707	0.0290706	0.0348704	0.0261834	0.0353469
92	ACVR2A	-0.249801	0.125711	-1.98711	0.0469097	0.538882	38.5039	6.50448	0.164509	-0.686122	0.30893	-2.92526	-0.795844	-1.68624	-0.16498	0.0751841	-0.78529	-0.136597	-0.338606	0.0578177	0.0592287	0.0720662	0.0294597	0.0403229
728215	FAM155A	0.1923	0.0968479	1.98558	0.0470797	0.540166	15.7629	4.7485	0.314089	2.78118	1.06863	-0.340965	0.812282	0.194332	0.491836	0.240259	-0.100973	0.134646	0.0355611	0.0312739	0.0505477	0.0876988	0.0274774	0.0334861
85449	KIAA1755	0.230532	0.116159	1.98462	0.0471867	0.540743	23.1711	5.20638	0.26677	0.928837	-0.354191	-0.109677	3.06711	1.00531	0.195329	-0.0882073	-0.0474825	0.54465	0.19795	0.0442235	0.0620205	0.187428	0.0315337	0.0387712
54084	TSPEAR	0.166829	0.0840805	1.98415	0.0472388	0.540743	0	2.21353	0.696553	0.764498	0.258008	2.15958	0.850937	0.333866	0.167775	0.0537915	0.386715	0.148301	0.0576201	0.0481616	0.0434671	0.0320658	0.0303734	0.0297854
254065	BRWD3	-0.241028	0.121468	-1.9843	0.0472226	0.540743	21.7518	5.11194	0.276004	0.923589	-0.764397	-1.6662	-1.06247	-2.2901	0.249601	-0.289723	-0.408031	-0.193996	-0.474592	0.0730359	0.143658	0.0599693	0.033339	0.0429471
3119	HLA-DQB1	0.299431	0.151	1.98299	0.0473686	0.541667	20.5346	5.03363	0.283864	-0.132148	-0.1777	2.84992	0.50097	1.53529	-0.0530262	-0.100813	0.860846	0.143	0.2807	0.161012	0.321856	0.09124	0.0814794	0.0334277
64398	MPP5	-0.185385	0.0934977	-1.98278	0.0473923	0.541667	0	3.54074	0.47171	0.0937428	-1.59232	-1.83676	-1.21277	0.288723	0.0249625	-0.483136	-0.305163	-0.221332	0.0599744	0.0709089	0.0920614	0.0276031	0.0333064	0.0431488
127253	TYW3	-0.217863	0.109944	-1.98158	0.047526	0.542364	0	1.47993	0.830191	-0.850364	-1.601	-0.718812	-1.21957	-0.340902	-0.273368	-0.521042	-0.148034	-0.273491	-0.0759476	0.103344	0.105916	0.0424125	0.0502888	0.0496329
64848	YTHDC2	-0.296666	0.149692	-1.98184	0.0474969	0.542364	52.8564	8.48472	0.0753516	-0.503972	-0.327313	-3.95314	0.251185	-2.07598	-0.157655	-0.112036	-0.681288	0.051096	-0.395153	0.0978591	0.117162	0.0297013	0.0413796	0.0362312
339327	ZNF546	0.244879	0.123612	1.98104	0.0475869	0.542416	50.1134	8.01819	0.090914	-0.417309	3.20131	-0.164704	2.08892	1.61749	-0.0860889	0.580809	-0.0373438	0.315091	0.367767	0.0425577	0.0329164	0.0514079	0.0227526	0.0516965
8803	SUCLA2	-0.191532	0.09669	-1.98089	0.0476034	0.542416	0	0.049134	0.999703	-0.842877	-0.804686	-0.847844	-0.743407	-1.15914	-0.191721	-0.235158	-0.188019	-0.158414	-0.200062	0.0517381	0.0854015	0.0491779	0.0454081	0.0297889
6429	SRSF4	-0.15972	0.0806547	-1.9803	0.0476703	0.542764	0	1.70754	0.789348	-0.447169	-0.806847	-1.98711	-0.842166	-0.346836	-0.0685683	-0.155329	-0.298715	-0.317006	-0.0604664	0.0235127	0.0370612	0.022598	0.14169	0.0303934
23318	ZCCHC11	-0.202911	0.102513	-1.97937	0.0477741	0.543437	2.80807	4.11557	0.390591	-0.458995	-0.736538	-2.22417	-1.49604	0.480345	-0.0965744	-0.233387	-0.420714	-0.376578	0.102478	0.04427	0.100407	0.0357798	0.0633611	0.0455148
50	ACO2	-0.246312	0.124496	-1.97847	0.0478753	0.543437	40.1986	6.68881	0.153276	0.468646	-1.20674	-1.45842	-0.528783	-3.07999	0.100766	-0.330997	-0.211631	-0.140725	-0.667329	0.0462312	0.0752349	0.021057	0.070825	0.0469442
55278	QRSL1	0.218313	0.110337	1.97859	0.0478618	0.543437	8.49138	4.37117	0.358097	0.93002	-0.29895	1.98816	0.310154	1.88333	0.249401	-0.093375	0.550811	0.0512065	0.439857	0.0719137	0.0975584	0.0767542	0.027258	0.0545471
158431	ZNF782	-0.276077	0.139526	-1.97867	0.0478528	0.543437	62.9775	10.8042	0.0288546	-0.437581	-2.83593	-3.55315	0.335975	-0.862367	-0.0939977	-0.681096	-0.53828	0.0563263	-0.167197	0.0461441	0.0576799	0.0229504	0.0281067	0.0375901
126969	SLC44A3	0.187419	0.094761	1.9778	0.0479508	0.54388	0	2.58903	0.628768	-0.681498	0.7401	0.474246	1.73598	1.5	-0.172667	0.189775	0.146439	0.296657	0.250544	0.064193	0.06575	0.0953468	0.0292024	0.0278987
26512	INTS6	-0.201445	0.101993	-1.97508	0.0482586	0.544884	0	1.40913	0.842607	-0.501862	-0.747195	-1.85318	-0.881606	-0.537059	-0.10381	-0.169141	-0.424597	-0.259746	-0.112787	0.0427868	0.0512423	0.0524953	0.086806	0.0441037
57611	ISLR2	0.209103	0.105823	1.97596	0.0481591	0.544884	20.5463	5.03438	0.283788	1.46692	-1.11475	1.51192	0.979364	1.98371	0.333398	-0.290817	0.469284	0.179193	0.295937	0.0516556	0.0680591	0.0963416	0.0334777	0.0222557
6626	SNRPA	0.17647	0.0893415	1.97523	0.0482424	0.544884	0	3.82904	0.429637	0.896038	1.32236	1.65322	-1.13982	1.07084	0.178907	0.275876	0.267727	-0.303566	0.214195	0.0398657	0.0435236	0.0262253	0.0709305	0.0400103
387119	CEP85L	-0.273961	0.138669	-1.97565	0.0481948	0.544884	30.4837	5.75404	0.218285	-0.742766	-2.29291	-1.91129	-1.13659	0.569003	-0.233149	-0.770272	-0.445181	-0.243699	0.133889	0.0985287	0.112853	0.0542524	0.0459724	0.0553679
84919	PPP1R15B	0.189651	0.0959966	1.9756	0.0481998	0.544884	0	1.43437	0.8382	1.44564	0.320352	0.4823	0.523173	1.62437	0.396207	0.102537	0.110505	0.0884723	0.289772	0.075115	0.102449	0.0524967	0.0285972	0.0318233
10189	ALYREF	-0.218041	0.110376	-1.97544	0.0482186	0.544884	17.5101	4.84908	0.303136	-1.33343	-0.399929	-2.79901	0.122014	-0.433964	-0.427406	-0.186482	-0.471689	0.0233553	-0.0799324	0.10274	0.217424	0.028399	0.0366397	0.0339264
4931	NVL	-0.290052	0.146898	-1.97452	0.0483232	0.5452	71.4089	13.9904	0.00732584	-0.516903	-0.778029	-5.29895	-0.522064	-1.47481	-0.0829094	-0.137368	-0.760312	-0.100005	-0.324829	0.025727	0.0311733	0.0205876	0.0366943	0.0485111
3705	ITPK1	0.241902	0.122565	1.97367	0.0484197	0.545875	24.6369	5.30764	0.257163	1.57816	0.886193	-0.124534	-0.279613	2.776	0.370159	0.234471	-0.0266563	-0.0885774	0.540968	0.0550139	0.070004	0.0458165	0.100353	0.0379756
50834	TAS2R1	0.272177	0.137973	1.97268	0.0485323	0.546732	64.2164	11.1783	0.0246315	-1.33617	0.955348	2.18529	3.42552	2.34046	-0.269082	0.222299	0.371429	0.569473	0.387066	0.0405548	0.054144	0.0288891	0.0276371	0.0273507
1643	DDB2	0.295385	0.149792	1.97196	0.0486137	0.546964	57.4695	9.405	0.0517362	0.453642	-0.819712	2.69127	0.904362	3.63891	0.120676	-0.2661	0.459489	0.163832	0.732891	0.070764	0.105382	0.0291498	0.0328182	0.0405634
24148	PRPF6	-0.261472	0.132623	-1.97154	0.0486618	0.546964	37.4583	6.39573	0.17148	-0.449003	-0.462006	-3.15076	0.609906	-2.11507	-0.151726	-0.220423	-0.480427	0.122679	-0.422164	0.114188	0.227625	0.0232501	0.0404587	0.0398395
57461	ISY1	-0.187927	0.0956153	-1.96545	0.0493618	0.546964	0	1.97388	0.740563	-1.02629	-0.487483	-0.207633	-0.550411	-2.04937	-0.25733	-0.188691	-0.0328875	-0.150838	-0.353408	0.0628698	0.149825	0.0250883	0.0751017	0.029738
5394	EXOSC10	-0.256513	0.130493	-1.96573	0.04933	0.546964	56.9421	9.28982	0.0542499	-0.200711	-2.12344	-4.00699	-0.62665	0.0365628	-0.0351218	-0.465938	-0.564724	-0.168501	0.00682471	0.0306203	0.0481478	0.0198626	0.0723031	0.0348408
2176	FANCC	0.259749	0.13212	1.96602	0.0492966	0.546964	52.7125	8.4589	0.0761428	0.536194	1.89938	-0.178705	3.72638	0.503638	0.131806	0.452496	-0.0379726	0.614218	0.0876254	0.0604265	0.0567554	0.0451511	0.0271687	0.0302708
27159	CHIA	0.238311	0.121304	1.96458	0.0494628	0.546964	45.2564	7.30679	0.120537	1.21891	2.03505	1.69357	2.15354	-0.883986	0.245454	0.400393	0.623732	0.331403	-0.150796	0.0405504	0.0387097	0.135641	0.0236814	0.0290997
65981	CAPRIN2	-0.297103	0.151117	-1.96606	0.0492922	0.546964	57.8483	9.48954	0.0499627	-0.00777962	-0.382297	-4.11227	-0.357094	-2.10998	-0.00164384	-0.106088	-0.703941	-0.0809487	-0.483229	0.0446479	0.0770065	0.0293028	0.051387	0.0524503
133686	NADK2	-0.200626	0.101873	-1.96936	0.0489113	0.546964	0	0.897148	0.92497	-0.0233633	-0.847522	-0.815606	-0.946126	-1.57998	-0.00649004	-0.259459	-0.27708	-0.158696	-0.295864	0.0771658	0.093721	0.115411	0.028134	0.0350655
55619	DOCK10	-0.220512	0.112207	-1.96522	0.0493885	0.546964	0	2.96265	0.564095	-1.41079	-0.676853	-1.78868	-1.00896	0.398636	-0.308217	-0.178529	-0.442252	-0.340284	0.0915718	0.0477297	0.0695715	0.0611327	0.113745	0.0527679
115861	NXNL1	0.216795	0.110295	1.9656	0.0493447	0.546964	0	2.36465	0.669024	0.472415	0.796471	1.24596	0.252084	1.93772	0.140721	0.262672	0.406425	0.043986	0.438843	0.0887303	0.108764	0.106403	0.0304465	0.0512905
114131	UCN3	0.18673	0.0950732	1.96407	0.0495222	0.546964	0	2.75267	0.60003	0.34741	0.560234	0.935165	2.30172	0.0568745	0.0847573	0.163442	0.291076	0.379135	0.00962676	0.0595208	0.085112	0.0968803	0.0271322	0.0286501
80219	COQ10B	-0.18755	0.0954472	-1.96496	0.0494185	0.546964	0	3.66784	0.452821	0.21763	-0.524597	-1.19017	-0.814689	-2.2641	0.0405595	-0.110872	-0.224189	-0.276623	-0.485669	0.0347335	0.0446677	0.0354822	0.11529	0.0460142
27127	SMC1B	0.194543	0.0990429	1.96423	0.0495037	0.546964	0	2.70094	0.609051	1.16834	1.89847	0.218395	0.240753	1.2183	0.275529	0.553405	0.0950519	0.0381654	0.23394	0.055615	0.084973	0.189425	0.0251301	0.0368719
9963	SLC23A1	0.184119	0.0935582	1.96796	0.0490722	0.546964	0	2.34272	0.673003	1.15276	-0.453516	1.55805	1.12305	0.996156	0.242273	-0.114466	0.456729	0.183495	0.19238	0.044171	0.0637041	0.0859323	0.0266962	0.0372961
11010	GLIPR1	-0.219499	0.111526	-1.96814	0.0490524	0.546964	0	1.45202	0.835105	-1.51183	-1.12851	-1.2419	-0.462573	-0.100652	-0.391649	-0.311836	-0.261984	-0.155218	-0.0219389	0.0671102	0.0763564	0.0445013	0.112595	0.0475104
51575	ESF1	0.233527	0.118608	1.9689	0.048965	0.546964	36.5473	6.30391	0.177573	0.716228	2.79849	0.632189	2.00309	-0.743889	0.177565	0.599407	0.119946	0.332101	-0.197255	0.061463	0.045877	0.0359979	0.0274877	0.070314
1654	DDX3X	-0.462968	0.235187	-1.96851	0.0490095	0.546964	78.8929	18.951	0.000803555	-0.0452964	-0.0572917	-4.20655	-0.986921	-4.09319	-0.00804578	-0.0139242	-0.889414	-0.393913	-1.02631	0.0315507	0.0590686	0.044705	0.159307	0.0628685
23460	ABCA6	0.19303	0.0981045	1.96759	0.0491148	0.546964	0	2.70522	0.608301	-0.329244	-0.0344001	0.753469	1.16748	2.12987	-0.09587	-0.0095713	0.299659	0.180497	0.382345	0.0847869	0.0774147	0.15817	0.0239026	0.0322259
5078	PAX4	0.197673	0.100533	1.96624	0.0492706	0.546964	0	0.56813	0.966538	1.39844	0.217239	0.639585	0.923625	1.08132	0.301031	0.0565735	0.197644	0.169618	0.228	0.0463377	0.067819	0.0954933	0.0337249	0.0444588
84078	KBTBD7	-0.242235	0.123235	-1.96564	0.0493402	0.546964	0	3.95572	0.412032	0.752301	-0.417911	-1.27533	-1.41354	-1.85857	0.212249	-0.16173	-0.296671	-0.345436	-0.550898	0.0795991	0.149766	0.0541136	0.0597198	0.0878584
28513	CDH19	0.154711	0.0787864	1.96368	0.0495669	0.546964	0	2.43927	0.655543	1.20304	-0.444159	0.255305	1.64635	1.36933	0.221555	-0.0832073	0.0626254	0.26336	0.198845	0.0339156	0.035095	0.0601704	0.0255891	0.0210867
9663	LPIN2	-0.252211	0.128273	-1.96621	0.049274	0.546964	25.9783	5.40382	0.248314	0.9897	-1.3359	-2.04467	-0.928249	-1.80261	0.242299	-0.340807	-0.370308	-0.301347	-0.487515	0.0599373	0.0650832	0.0328006	0.105392	0.0731424
678	ZFP36L2	-0.230358	0.117084	-1.96746	0.0491306	0.546964	0	3.86836	0.424114	-1.13084	-0.831231	-2.15527	-0.878075	0.594373	-0.313641	-0.316904	-0.433144	-0.308994	0.132143	0.0769239	0.145349	0.0403887	0.123833	0.0494278
93349	SP140L	0.28292	0.144085	1.96356	0.0495806	0.546964	34.4607	6.10321	0.191572	-0.429118	1.11524	1.96338	0.377283	2.48958	-0.133544	0.377267	0.597683	0.0660645	0.587703	0.0968492	0.114436	0.0926688	0.0306621	0.0557267
201895	SMIM14	0.196368	0.099674	1.97011	0.0488261	0.546964	0	2.14885	0.708404	0.410998	0.0292887	1.78201	-0.136665	1.63283	0.0925671	0.00775157	0.273197	-0.048824	0.404649	0.0507263	0.0700454	0.0235033	0.12763	0.0614146
79602	ADIPOR2	-0.172035	0.0873586	-1.9693	0.0489185	0.546964	0	3.14495	0.533868	0.214967	-0.34327	-1.54179	-1.32451	-1.65154	0.0361865	-0.0737228	-0.255739	-0.400952	-0.318985	0.0283368	0.0461245	0.0275133	0.0916373	0.0373044
51593	SRRT	-0.217659	0.11074	-1.9655	0.0493568	0.546964	37.7178	6.42238	0.169747	-0.0940967	-0.030118	-3.56103	-0.519255	-1.31754	-0.0164787	-0.00622968	-0.504368	-0.180291	-0.249957	0.0306687	0.0427838	0.0200606	0.120555	0.0359915
54458	PRR13	0.29129	0.147845	1.97024	0.0488112	0.546964	56.9775	9.29746	0.0540796	1.95362	-0.588628	3.01323	-0.205475	2.53071	0.31068	-0.114855	0.646712	-0.0802971	0.531695	0.0252901	0.0380727	0.0460635	0.152714	0.0441407
143884	CWF19L2	-0.206479	0.105241	-1.96197	0.0497664	0.547393	16.2776	4.7777	0.310877	0.861877	-1.16973	-1.24326	-1.24273	-2.04211	0.177522	-0.281076	-0.2465	-0.302677	-0.406337	0.0424242	0.0577397	0.0393104	0.0593207	0.0395926
22859	ADGRL1	-0.242626	0.123661	-1.96203	0.0497593	0.547393	33.5537	6.0199	0.197667	-1.07609	-0.215431	-3.28272	-0.588723	-0.128776	-0.256943	-0.054812	-0.660343	-0.121759	-0.0300967	0.0570139	0.0647346	0.0404641	0.0427742	0.0546221
85280	KRTAP9-4	0.188936	0.0962928	1.9621	0.0497513	0.547393	0	0.906622	0.923609	1.28042	0.958093	0.191184	1.46829	-0.0812908	0.251265	0.204073	0.0775975	0.234521	-0.0212962	0.038509	0.0453689	0.164736	0.0255118	0.0686312
27324	TOX3	-0.299926	0.152837	-1.96239	0.0497169	0.547393	63.0535	10.8265	0.0285851	-1.44145	-0.722147	-3.09425	0.41494	-2.19052	-0.29429	-0.1611	-1.02278	0.0609316	-0.416284	0.0416825	0.049767	0.109258	0.0215633	0.0361146
54442	KCTD5	-0.173595	0.0885057	-1.9614	0.0498319	0.54771	0	1.12331	0.890556	-1.22275	-1.1095	-0.825336	-1.24174	-0.145602	-0.212289	-0.226158	-0.168687	-0.319811	-0.0259823	0.0301427	0.0415497	0.0417733	0.0663321	0.0318438
23450	SF3B3	-0.174334	0.0889469	-1.95998	0.0499986	0.549137	0	1.44412	0.836491	-0.378042	-0.346122	-0.834094	-0.407469	-2.03989	-0.0885939	-0.0860978	-0.124714	-0.114401	-0.346737	0.0549196	0.0618763	0.0223561	0.0788261	0.0288925
3857	KRT9	0.204138	0.104189	1.95931	0.0500762	0.549585	0	3.93632	0.414692	0.0190192	0.519156	1.33764	2.37893	-0.238234	0.0054922	0.1672	0.278694	0.477913	-0.0500319	0.0833892	0.103724	0.0434088	0.0403584	0.0441051
50512	PODXL2	0.209574	0.107244	1.95417	0.0506808	0.549643	0	3.87673	0.422946	0.604216	1.24127	-0.930759	1.77544	1.33086	0.184616	0.414458	-0.243698	0.318925	0.28578	0.0933581	0.111488	0.0685535	0.0322676	0.0461102
7253	TSHR	0.157598	0.0805761	1.95589	0.0504785	0.549643	0	3.10981	0.539621	-0.171274	1.56177	0.582121	2.0121	0.281799	-0.0266955	0.273462	0.184574	0.308238	0.0535566	0.0242938	0.0306592	0.100534	0.0234678	0.0361199
11218	DDX20	-0.276216	0.141589	-1.95083	0.0510773	0.549643	54.5919	8.809	0.0660549	0.321159	-0.833874	-1.82137	-0.358207	-3.85214	0.09016	-0.250887	-0.306253	-0.0640667	-0.726384	0.0788112	0.0905222	0.0282725	0.0319887	0.0355573
4692	NDN	-0.393118	0.201414	-1.9518	0.0509625	0.549643	64.735	11.3427	0.022971	-0.940201	-0.27722	-2.77831	0.518667	-4.29987	-0.349635	-0.106962	-0.505283	0.133563	-0.963501	0.138289	0.148872	0.0330757	0.0663122	0.0502104
900	CCNG1	-0.198813	0.101641	-1.95604	0.0504609	0.549643	16.7115	4.80258	0.30816	0.380154	-2.06208	-0.8738	-1.77127	-0.887194	0.0689131	-0.519643	-0.154414	-0.439106	-0.182789	0.0328612	0.063504	0.0312283	0.0614566	0.0424487
26524	LATS2	-0.20372	0.104309	-1.95304	0.0508146	0.549643	0	1.46529	0.832772	0.327385	-0.568744	-1.60694	-1.07028	-1.0589	0.0930835	-0.188344	-0.32392	-0.216266	-0.229342	0.0808401	0.109666	0.0406329	0.04083	0.0469093
6133	RPL9	-0.20619	0.105692	-1.95086	0.0510738	0.549643	0	0.379186	0.984145	-1.10458	-0.321758	-0.911074	-0.65908	-1.26371	-0.219945	-0.0837766	-0.187423	-0.255006	-0.28812	0.0396489	0.0677932	0.0423191	0.149701	0.0519819
158248	TTC16	-0.196795	0.100661	-1.95503	0.0505801	0.549643	8.65455	4.37898	0.357139	-2.29497	-0.826626	0.561195	-0.811553	-1.28324	-0.55592	-0.213553	0.122882	-0.167635	-0.224756	0.0586777	0.0667413	0.0479456	0.0426674	0.0306765
8899	PRPF4B	-0.176976	0.0906725	-1.95182	0.0509596	0.549643	0	1.31595	0.858663	-0.678699	0.0449797	-0.889657	-0.668295	-1.85062	-0.180233	0.0179071	-0.12641	-0.132135	-0.362721	0.07052	0.158497	0.020189	0.0390933	0.0384159
2801	GOLGA2	-0.181145	0.0927539	-1.95297	0.0508237	0.549643	0	1.22845	0.873393	-0.577191	-0.144554	-1.01163	-0.974476	-1.64787	-0.11913	-0.0365533	-0.15874	-0.231097	-0.380795	0.0425991	0.0639431	0.0246224	0.0562403	0.0533994
48	ACO1	0.16972	0.0868733	1.95365	0.0507423	0.549643	0	3.70528	0.447358	1.10464	-0.0338181	1.64221	-0.537306	1.82075	0.172919	-0.00671317	0.314805	-0.142073	0.365603	0.0245041	0.0394055	0.0367476	0.0699161	0.04032
8772	FADD	-0.23373	0.119333	-1.95865	0.050154	0.549643	35.5023	6.20178	0.184578	-0.144954	-1.78329	0.296544	-1.97419	-2.03558	-0.0329612	-0.444661	0.0491897	-0.516287	-0.392841	0.0517066	0.062175	0.0275151	0.0683917	0.0372443
163486	DENND1B	-0.204245	0.104473	-1.955	0.0505827	0.549643	31.8225	5.86704	0.209301	-1.13712	-2.66508	0.743274	-1.14165	-1.10096	-0.229862	-0.523612	0.144932	-0.204275	-0.212862	0.0408619	0.0386012	0.0380216	0.0320158	0.0373807
51386	EIF3L	-0.190243	0.0971454	-1.95833	0.0501913	0.549643	0	3.6435	0.456397	-2.33607	-0.584225	-1.09089	-0.650861	0.257623	-0.45072	-0.126458	-0.233698	-0.255443	0.0474524	0.0372256	0.0468527	0.0458936	0.154032	0.0339272
89970	RSPRY1	-0.189829	0.0972799	-1.95137	0.0510136	0.549643	0	2.36067	0.669746	-1.22823	-0.168625	-1.95806	-0.892434	-0.0329136	-0.282182	-0.0424217	-0.347309	-0.2818	-0.00610027	0.0527836	0.0632895	0.0314616	0.099708	0.0343517
10606	PAICS	-0.168999	0.0863774	-1.95651	0.0504046	0.549643	0	0.586454	0.964557	-1.17728	-0.711126	-0.702959	-1.28026	-0.624097	-0.200065	-0.134353	-0.122805	-0.336761	-0.126952	0.0288789	0.0356944	0.030519	0.0691909	0.0413782
256643	BCLAF3	0.181136	0.0926677	1.95469	0.0506201	0.549643	0	3.12214	0.537598	0.908053	2.05471	0.206504	1.33171	0.283643	0.253021	0.554652	0.0359321	0.231749	0.0581427	0.0776412	0.0728686	0.0302767	0.0302842	0.0420191
9240	PNMA1	-0.225482	0.115537	-1.95161	0.0509848	0.549643	18.1071	4.88443	0.299363	-0.261403	-1.19552	-0.349402	-0.346211	-2.7837	-0.0636142	-0.388716	-0.0796449	-0.0666007	-0.61346	0.0592224	0.105719	0.0519594	0.0370064	0.0485653
124359	CDYL2	-0.187973	0.0963105	-1.95174	0.0509693	0.549643	0	3.74621	0.44144	0.0889695	0.473807	-1.50867	-0.9918	-2.01577	0.0221065	0.12483	-0.414272	-0.173124	-0.36133	0.0617385	0.0694117	0.075402	0.0304696	0.0321311
255104	TMCO4	0.184216	0.0942216	1.95513	0.0505675	0.549643	0	1.3012	0.861172	0.859002	0.245272	1.95766	0.627874	0.3147	0.224172	0.0707612	0.326185	0.113261	0.0718349	0.0681043	0.0832328	0.0277622	0.0325399	0.0521047
57403	RAB22A	-0.180767	0.0925626	-1.95292	0.0508291	0.549643	0	1.80873	0.770885	-0.822264	0.151001	-0.666742	-1.12461	-1.79288	-0.174976	0.0373311	-0.112375	-0.322229	-0.322596	0.0452828	0.0611197	0.028407	0.0820966	0.0323755
5226	PGD	0.221843	0.113482	1.95488	0.0505973	0.549643	0	1.92802	0.748995	1.68777	0.258916	1.62656	-0.190777	0.389733	0.334107	0.0661294	0.39816	-0.081306	0.101967	0.0391875	0.0652333	0.0599206	0.181632	0.0684512
170960	ZNF721	-0.282993	0.144947	-1.95239	0.0508923	0.549643	48.5804	7.77914	0.100012	-0.104383	0.345769	-3.14471	-0.722975	-2.56813	-0.022312	0.094909	-0.531342	-0.196603	-0.669554	0.0456894	0.0753432	0.0285488	0.0739495	0.0679734
23142	DCUN1D4	-0.192661	0.0986816	-1.95235	0.0508967	0.549643	0	1.48621	0.829081	-0.642776	-1.59831	-0.550491	-0.302001	-1.39135	-0.130598	-0.369614	-0.114261	-0.0680982	-0.338576	0.0412811	0.0534776	0.043082	0.0508456	0.0592158
7167	TPI1	0.269937	0.137902	1.95746	0.0502938	0.549643	44.2543	7.17544	0.126902	1.90108	-0.154678	2.83111	-0.755061	1.81599	0.387256	-0.0322783	0.587183	-0.288122	0.389116	0.0414949	0.0435474	0.0430162	0.145609	0.0459127
80183	RUBCNL	0.230044	0.11778	1.95317	0.0507993	0.549643	0	3.31954	0.505842	1.24418	0.0600987	0.834877	-0.415914	2.1709	0.268022	0.016553	0.285587	-0.132549	0.498509	0.0464057	0.0758616	0.117013	0.101566	0.0527311
5499	PPP1CA	0.239276	0.122259	1.95713	0.0503326	0.549643	41.1845	6.80092	0.14679	0.153504	2.50309	0.624571	-0.368782	2.67736	0.0310324	0.55932	0.105844	-0.118273	0.483568	0.0408687	0.0499307	0.028719	0.102856	0.0326213
137362	GOT1L1	0.328199	0.168363	1.94935	0.0512531	0.551137	73.0581	14.8467	0.00502986	1.73791	0.647751	0.825821	0.173672	5.36914	0.351677	0.140221	0.229346	0.0278043	0.832571	0.0409482	0.0468608	0.0771278	0.025631	0.0240455
50614	GALNT9	0.17728	0.0910075	1.94797	0.0514185	0.551705	0	1.72457	0.78625	1.15176	-0.265671	-0.244884	1.66389	1.13733	0.216252	-0.0659336	-0.105822	0.253442	0.216175	0.0352532	0.0615921	0.186737	0.023201	0.0361276
10786	SLC17A3	0.184954	0.0949558	1.94779	0.0514399	0.551705	0	2.98914	0.559644	0.0910119	0.764907	-0.149	0.631754	2.40174	0.0235447	0.206202	-0.0446304	0.103512	0.413055	0.0669251	0.0726722	0.0897202	0.0268464	0.0295776
6450	SH3BGR	-0.190878	0.0980028	-1.94767	0.051454	0.551705	0	2.51977	0.6411	-0.195996	0.276084	-0.731966	-1.57455	-1.78426	-0.0442226	0.0709873	-0.191286	-0.268619	-0.395557	0.0509088	0.0661117	0.0682941	0.0291044	0.0491477
3034	HAL	0.235433	0.120872	1.94778	0.0514411	0.551705	1.1753	4.04757	0.399606	1.58594	0.329516	1.52226	-0.708019	1.56485	0.385152	0.101272	0.398442	-0.186587	0.438317	0.0589785	0.0944558	0.0685099	0.06945	0.0784564
3006	HIST1H1C	0.247558	0.127131	1.94728	0.0515015	0.551818	0	3.76847	0.438246	0.776906	-0.137676	2.61699	0.224428	0.196962	0.214021	-0.0490723	0.594765	0.0749623	0.0557076	0.0758885	0.127045	0.0516517	0.111566	0.0799956
152007	GLIPR2	0.232404	0.119371	1.9469	0.0515463	0.551901	28.4518	5.59064	0.231877	1.61019	2.26476	-0.699936	-0.152016	1.82656	0.299448	0.471399	-0.153253	-0.0602018	0.379882	0.0345849	0.0433246	0.0479402	0.156835	0.0432547
22996	TTC39A	-0.285762	0.146826	-1.94626	0.0516234	0.55233	59.4507	9.86455	0.0427723	-1.80493	-0.141327	-0.422587	-0.360375	-4.28744	-0.384418	-0.0336186	-0.128108	-0.0604229	-0.70877	0.0453615	0.0565858	0.0919014	0.028112	0.0273284
8615	USO1	-0.232939	0.119726	-1.9456	0.0517024	0.552778	26.345	5.43073	0.245886	-0.147747	-1.35232	0.0546559	-1.19712	-2.63214	-0.0314742	-0.367957	0.0100727	-0.363487	-0.562768	0.0453808	0.074035	0.0339637	0.0921941	0.0457132
259	AMBP	-0.241599	0.1242	-1.94524	0.0517462	0.55285	33.8761	6.04925	0.1955	-2.4489	0.263663	-0.411907	-0.344132	-2.36631	-0.60408	0.0739358	-0.113322	-0.058736	-0.45948	0.0608479	0.0786341	0.0756885	0.0291311	0.0377043
55705	IPO9	-0.184324	0.0947833	-1.94469	0.051812	0.552896	0	1.74458	0.782605	-1.4454	-1.23921	-1.27226	-0.491678	0.20294	-0.256582	-0.277413	-0.283476	-0.116546	0.0435835	0.0315121	0.0501142	0.0496458	0.0561866	0.046122
27067	STAU2	-0.25425	0.130748	-1.94459	0.0518248	0.552896	42.596	6.96815	0.137581	0.651897	-0.307924	-3.07529	-1.73777	-1.20951	0.160386	-0.0794507	-0.627733	-0.379757	-0.232075	0.0605305	0.0665748	0.0416655	0.0477558	0.0368163
2677	GGCX	0.181671	0.0934425	1.9442	0.0518717	0.553001	0	1.3626	0.850668	0.153826	-0.119742	1.40687	0.677955	1.63267	0.0422386	-0.0362414	0.248013	0.131175	0.29109	0.0753979	0.0916048	0.031077	0.0374367	0.0317878
51538	ZCCHC17	-0.175506	0.0903118	-1.94333	0.0519764	0.553428	0	2.32017	0.6771	-1.62673	0.388083	-0.659452	-1.02293	-1.34854	-0.280931	0.0800665	-0.128275	-0.277445	-0.266741	0.0298241	0.042565	0.0378368	0.0735634	0.0391247
4688	NCF2	0.246645	0.126924	1.94325	0.051986	0.553428	2.44204	4.10013	0.392625	0.953489	-0.759216	1.2223	-0.141455	2.25683	0.258932	-0.266477	0.405237	-0.0500086	0.447916	0.0737464	0.123194	0.109917	0.124984	0.039391
4287	ATXN3	-0.196162	0.100967	-1.94284	0.052035	0.553555	0	3.06983	0.546209	0.815646	-0.652889	-0.965857	-1.4146	-1.67898	0.224549	-0.208732	-0.185981	-0.364596	-0.291863	0.0757916	0.102212	0.0370774	0.0664289	0.0302183
91408	BTF3L4	-0.199473	0.102735	-1.94164	0.0521809	0.55471	0	1.82502	0.767901	-1.36284	-1.29307	-0.195448	-1.36823	-0.394163	-0.332164	-0.359177	-0.0431378	-0.3272	-0.075943	0.0594043	0.0771564	0.0487139	0.057188	0.0371214
9587	MAD2L1BP	-0.172348	0.0888435	-1.9399	0.0523917	0.555762	0	1.25508	0.86895	-0.496265	-0.700257	-1.76455	-1.06671	-0.173648	-0.109926	-0.206867	-0.27257	-0.236599	-0.0304055	0.0490657	0.0872709	0.0238611	0.0491958	0.0306595
408	ARRB1	0.316889	0.163331	1.94016	0.0523605	0.555762	67.354	12.2526	0.0155681	1.02144	3.94047	0.788309	-0.837784	2.86022	0.198843	0.777004	0.170067	-0.206096	0.561045	0.0378964	0.0388822	0.0465423	0.0605167	0.0384767
401551	WDR38	0.195656	0.100831	1.94043	0.0523275	0.555762	0	1.45058	0.835357	1.57121	-0.110171	0.260397	1.06565	1.23757	0.384021	-0.0312349	0.0943562	0.168472	0.266593	0.0597365	0.0803787	0.131301	0.0249935	0.046404
81928	CABLES2	-0.207682	0.107131	-1.93858	0.0525522	0.555883	5.89827	4.25072	0.373137	0.024109	-0.786663	-2.58843	-0.337438	-0.889989	0.00672399	-0.244998	-0.635608	-0.0636887	-0.17549	0.0777851	0.0969946	0.0602984	0.0356235	0.0388807
63875	MRPL17	-0.191316	0.0986881	-1.93859	0.0525507	0.555883	0	0.125852	0.998101	-0.96313	-0.640317	-1.18804	-0.397703	-0.988314	-0.224531	-0.164126	-0.20468	-0.111226	-0.207986	0.0543479	0.0656996	0.0296817	0.0782166	0.0442873
122830	NAA30	-0.200187	0.103252	-1.93882	0.0525227	0.555883	0	0.85049	0.931554	-0.00485571	-0.750942	-0.809521	-1.12524	-1.45743	-0.00132511	-0.227081	-0.170106	-0.224509	-0.313089	0.0744724	0.0914424	0.0441554	0.0398087	0.0461486
51309	ARMCX1	-0.184559	0.0951595	-1.93946	0.0524448	0.555883	0	3.50122	0.477693	0.390299	-0.765875	-1.51341	-0.22333	-2.04537	0.102695	-0.206412	-0.287756	-0.0397518	-0.42652	0.0692319	0.0726366	0.0361521	0.0316825	0.0434845
7125	TNNC2	-0.215287	0.111073	-1.93825	0.0525927	0.555916	0	2.64041	0.619681	-1.17605	0.735745	-1.2046	-1.63332	-0.595005	-0.370454	0.260492	-0.298532	-0.327012	-0.12752	0.0992247	0.125353	0.0614185	0.0400853	0.0459318
8387	OR1E1	0.181382	0.0936141	1.93755	0.0526786	0.556429	0	1.17194	0.882697	0.570219	0.125107	0.373787	1.33805	1.62945	0.120432	0.0277385	0.119302	0.223019	0.322459	0.0446067	0.0491591	0.10187	0.0277802	0.0391622
28957	MRPS28	-0.174112	0.0898921	-1.93691	0.0527569	0.556862	1.85398	4.07556	0.395876	0.150582	0.011128	-1.53162	-0.911278	-2.17351	0.0288066	0.00284295	-0.215834	-0.200459	-0.596461	0.0365961	0.0652685	0.0198583	0.0483892	0.075308
58499	ZNF462	-0.258531	0.133587	-1.9353	0.0529534	0.557786	15.2331	4.71882	0.317383	-1.64253	0.438282	-0.391176	-0.238401	-2.5403	-0.475402	0.137931	-0.153609	-0.0566514	-0.544799	0.0837711	0.0990417	0.154202	0.0564684	0.0459943
25885	POLR1A	-0.360434	0.186274	-1.93497	0.0529942	0.557786	78.2337	18.377	0.00104135	-3.17657	0.133105	-3.1719	0.759189	-3.70148	-0.63583	0.0286665	-0.725506	0.12929	-0.623342	0.0400649	0.046383	0.0523171	0.0290024	0.0283597
51247	PAIP2	-0.21973	0.113508	-1.93581	0.0528904	0.557786	33.9957	6.06021	0.194696	-2.27666	-0.79529	0.774883	-1.07885	-2.07006	-0.43965	-0.16176	0.142676	-0.37656	-0.352348	0.0372922	0.0413704	0.0339025	0.121827	0.0289718
1954	MEGF8	-0.168611	0.0871262	-1.93525	0.0529601	0.557786	0	3.09394	0.542229	-1.87691	-1.35462	0.234803	-0.624799	-1.01775	-0.418525	-0.352117	0.0453937	-0.109481	-0.1662	0.0497228	0.0675678	0.0373752	0.030704	0.0266673
10952	SEC61B	-0.190647	0.098566	-1.9342	0.0530882	0.558005	0	0.163031	0.996853	-1.10699	-0.824801	-0.646651	-0.670727	-1.06321	-0.215112	-0.211419	-0.125575	-0.247995	-0.203131	0.037761	0.0657039	0.0377106	0.136708	0.0365015
221294	NT5DC1	0.181472	0.0938236	1.93419	0.0530899	0.558005	0	3.35142	0.500827	1.5155	0.0355824	1.5654	-0.426935	1.47029	0.404956	0.0103887	0.274451	-0.0847221	0.268724	0.0714005	0.085242	0.0307383	0.0393794	0.0334047
57590	WDFY1	0.186006	0.0961944	1.93365	0.0531564	0.558311	0	1.58605	0.811297	0.940431	1.16419	0.655707	-0.462148	1.56261	0.171593	0.2476	0.133728	-0.160475	0.321742	0.0332924	0.0452324	0.0415931	0.120575	0.0423948
29946	SERTAD3	-0.190779	0.0986889	-1.93313	0.0532197	0.558582	0	1.86504	0.760564	-1.44075	0.0991077	-1.61334	-0.135867	-0.946119	-0.260876	0.0278938	-0.378765	-0.0315763	-0.197742	0.0327861	0.0792138	0.0551174	0.0540123	0.0436822
92565	FANK1	-0.265078	0.137159	-1.93264	0.0532812	0.558834	46.9585	7.54126	0.109904	-0.650081	-2.61762	-0.128896	-0.0807688	-2.47543	-0.143869	-0.669573	-0.0353877	-0.0131115	-0.564631	0.0489781	0.0654308	0.0753747	0.0263524	0.0520268
11264	PXMP4	-0.214052	0.110869	-1.93068	0.0535231	0.559795	31.5009	5.83949	0.21146	0.0437871	-2.80898	-1.63741	-0.349525	-0.58051	0.0110244	-0.687841	-0.30107	-0.0591605	-0.115787	0.0633896	0.0599621	0.0338081	0.0286489	0.0397836
23140	ZZEF1	-0.183271	0.0949057	-1.93108	0.053473	0.559795	15.2832	4.72161	0.317072	0.244008	-1.05984	-2.57138	-1.24743	-0.0340186	0.0447962	-0.227872	-0.398553	-0.343707	-0.00645609	0.0337034	0.0462274	0.0240238	0.0759178	0.0360168
9398	CD101	0.244315	0.126534	1.93082	0.0535055	0.559795	22.0422	5.13098	0.27412	-0.347274	2.13681	0.327131	0.66407	2.15939	-0.0933325	0.614631	0.115605	0.116643	0.504108	0.0722306	0.0827366	0.124886	0.0308525	0.0544988
9646	CTR9	-0.225231	0.116618	-1.93136	0.053439	0.559795	30.5478	5.75935	0.217855	0.37054	0.330336	-2.9824	-0.554697	-1.85462	0.11137	0.106813	-0.519836	-0.108141	-0.321492	0.0903365	0.104553	0.030381	0.0380073	0.0300489
10291	SF3A1	-0.179658	0.093084	-1.93007	0.0535984	0.560189	0	0.144451	0.997514	-0.859502	-0.349954	-0.899314	-0.988527	-1.10565	-0.23572	-0.0996896	-0.166836	-0.175767	-0.204938	0.0752142	0.0811479	0.0344156	0.0316153	0.0343569
6793	STK10	0.182454	0.0947205	1.92624	0.054075	0.560401	0	3.69676	0.448598	0.637429	2.26604	0.937417	-0.76352	0.635729	0.121417	0.427587	0.215681	-0.242922	0.122252	0.0362825	0.035605	0.0529368	0.101226	0.0369802
254359	ZDHHC24	0.234167	0.121556	1.92641	0.0540534	0.560401	31.8418	5.8687	0.209171	-0.313759	0.454066	1.85565	0.148066	2.8978	-0.0871432	0.153817	0.324385	0.0285279	0.593822	0.077139	0.114755	0.0305584	0.0371216	0.041993
509	ATP5F1C	-0.200379	0.103882	-1.92891	0.053742	0.560401	0	0.411645	0.981512	-1.16094	-0.406474	-1.19997	-0.957023	-0.513341	-0.253231	-0.119723	-0.211071	-0.328529	-0.116807	0.047579	0.0867541	0.0309395	0.117842	0.0517754
151556	GPR155	-0.162582	0.0843691	-1.92704	0.0539751	0.560401	1.83021	4.07457	0.396008	-0.554686	-1.84555	-1.32912	0.485377	-1.46073	-0.128168	-0.455651	-0.18936	0.0805811	-0.304291	0.0533906	0.0609556	0.0202976	0.0275619	0.0433949
5020	OXT	0.303715	0.157626	1.92681	0.0540039	0.560401	61.91	10.5015	0.032777	0.270888	0.229363	0.428717	4.51524	1.81067	0.0633312	0.0571223	0.0975464	0.792704	0.3842	0.0546582	0.0620244	0.0517703	0.030822	0.0450229
9080	CLDN9	0.197372	0.102396	1.92755	0.0539113	0.560401	0	2.09401	0.718474	1.293	1.67827	0.932993	0.495528	0.452757	0.368751	0.496759	0.243861	0.0828565	0.0981888	0.0813336	0.0876126	0.0683167	0.0279587	0.0470319
57149	LYRM1	0.185758	0.0963824	1.9273	0.0539422	0.560401	0	1.94566	0.745753	0.836774	0.585069	1.89444	-0.296587	0.969944	0.143212	0.126011	0.404829	-0.0976431	0.212541	0.0292917	0.0463878	0.0456649	0.108388	0.0480167
2046	EPHA8	0.20048	0.104092	1.92598	0.0541074	0.560401	16.4438	4.7872	0.309838	0.426375	1.90529	-0.955161	1.73211	1.32725	0.0898354	0.421613	-0.246755	0.310339	0.280098	0.0443927	0.0489673	0.066739	0.0321013	0.0445367
6539	SLC6A12	0.303015	0.157067	1.9292	0.0537056	0.560401	50.4177	8.06739	0.0891405	-0.00893784	3.24443	0.270085	0.462785	2.13801	-0.00230546	0.848882	0.108761	0.0815335	0.458983	0.0665348	0.068457	0.162161	0.0310394	0.0460864
2904	GRIN2B	0.156766	0.0812532	1.92935	0.0536873	0.560401	0	3.10646	0.54017	1.06599	-0.373652	0.177777	1.77877	1.53534	0.233615	-0.0961176	0.0252794	0.278984	0.304483	0.0480278	0.0661716	0.0202201	0.0245992	0.0393294
128025	WDR64	0.158784	0.0823559	1.92802	0.0538532	0.560401	0	1.24749	0.870219	0.090833	0.516149	0.650852	1.80262	1.00848	0.0196005	0.126618	0.193799	0.30339	0.127296	0.0465637	0.0601782	0.0886623	0.0283266	0.0159328
9122	SLC16A4	0.317688	0.16479	1.92784	0.0538756	0.560401	68.6527	12.7603	0.0125085	1.08501	0.652058	4.38384	0.327571	1.01656	0.214439	0.154249	1.06948	0.0558704	0.199161	0.0390604	0.0559593	0.0595164	0.0290907	0.0383832
139221	MUM1L1	0.174759	0.090632	1.92822	0.0538275	0.560401	0	2.99431	0.558778	0.0507586	0.504268	2.13896	1.19476	0.672949	0.0109604	0.122828	0.569296	0.207046	0.112121	0.0466269	0.0593296	0.0708385	0.0300309	0.0277596
3199	HOXA2	-0.183624	0.0953656	-1.92548	0.0541696	0.560656	0	1.74943	0.78172	-0.876168	-0.51228	-1.84568	-0.783038	-0.638062	-0.172045	-0.107517	-0.548597	-0.129857	-0.172774	0.0385577	0.0440493	0.0883477	0.0275021	0.0733217
6785	ELOVL4	-0.187725	0.0975212	-1.92497	0.054233	0.560775	0	3.33943	0.50271	-0.631595	0.809289	-0.499019	-0.815599	-2.25319	-0.173293	0.250642	-0.130967	-0.148696	-0.371246	0.0752809	0.0959181	0.0688799	0.033239	0.0271474
6588	SLN	0.192178	0.0998909	1.92388	0.0543693	0.560775	4.23189	4.17676	0.382613	-0.994383	1.18439	0.456209	1.8615	1.45899	-0.228578	0.324807	0.22995	0.30068	0.257179	0.0528399	0.0752079	0.254061	0.0260906	0.0310719
79872	CBLL1	-0.225375	0.117134	-1.92407	0.054346	0.560775	31.4436	5.83461	0.211845	-0.280933	0.143249	-3.15731	-0.700736	-1.10325	-0.056087	0.0328563	-0.593683	-0.189018	-0.235545	0.0398585	0.0526083	0.035357	0.0727611	0.0455825
55070	DET1	-0.162779	0.0845767	-1.92464	0.054275	0.560775	0	2.31612	0.677836	-0.829547	-0.6905	-0.0313497	-0.447284	-2.1574	-0.168767	-0.1791	-0.00554524	-0.0811457	-0.348022	0.0413899	0.0672767	0.0312876	0.0329128	0.0260228
133957	CCDC127	0.163882	0.0851599	1.9244	0.0543044	0.560775	0	3.10748	0.540003	1.29324	0.263841	1.43343	-0.689	1.59351	0.253528	0.0684104	0.207444	-0.146777	0.305476	0.0384323	0.0672294	0.0209434	0.0453813	0.036749
8788	DLK1	-0.243369	0.126692	-1.92095	0.0547386	0.561513	0	3.53703	0.472271	0.104637	-0.07289	-1.25908	-2.37068	-0.0734231	0.0459438	-0.0319549	-0.313844	-0.569565	-0.0170741	0.192789	0.192194	0.0621328	0.057722	0.0540763
6574	SLC20A1	-0.19599	0.102095	-1.91968	0.054898	0.561513	0	2.1076	0.715977	-0.969081	-1.67597	0.242562	-0.74984	-1.19318	-0.187649	-0.398238	0.053512	-0.264964	-0.248789	0.0374948	0.0564615	0.0486697	0.124864	0.0434759
25998	IBTK	-0.17973	0.0935752	-1.9207	0.0547697	0.561513	0	3.70766	0.447013	0.425949	0.255554	-1.77934	-1.01575	-1.71819	0.0906673	0.0671734	-0.287499	-0.283208	-0.333825	0.0453092	0.0690923	0.0261068	0.0777385	0.037748
25873	RPL36	-0.181837	0.0945663	-1.92285	0.0544992	0.561513	0	3.64543	0.456112	-2.21213	0.335931	-1.29796	-0.772457	-0.234529	-0.498616	0.0835888	-0.197746	-0.273955	-0.0469487	0.0508053	0.0619152	0.023211	0.12578	0.0400732
10681	GNB5	-0.189553	0.098704	-1.92042	0.0548054	0.561513	11.799	4.5351	0.338406	-0.97985	-2.48949	0.29807	-0.458303	-1.09672	-0.188344	-0.605711	0.0682447	-0.0849122	-0.220049	0.0369473	0.0591986	0.0524205	0.0343269	0.0402574
3752	KCND3	0.171236	0.0891177	1.92145	0.0546746	0.561513	0	3.16635	0.530384	-0.0624172	1.63416	-0.506515	1.67076	1.06581	-0.0134297	0.330961	-0.128673	0.271405	0.206884	0.0462938	0.0410169	0.0645343	0.0263881	0.0376782
84967	LSM10	0.202284	0.105275	1.92149	0.0546695	0.561513	27.8079	5.54078	0.236169	0.713754	2.73651	0.506954	-0.659557	1.51687	0.12669	0.550067	0.090736	-0.195621	0.280689	0.0315054	0.0404053	0.0320347	0.0879678	0.0342418
54555	DDX49	0.175638	0.0915035	1.91946	0.0549255	0.561513	0	2.25768	0.688484	-0.656878	0.909953	1.19201	0.820652	1.60878	-0.180604	0.250024	0.200814	0.150251	0.304618	0.0755936	0.0754964	0.0283808	0.0335212	0.0358526
9177	HTR3B	-0.187668	0.097748	-1.91992	0.0548678	0.561513	0	3.81725	0.431304	0.477201	-0.525708	0.0837301	-2.26674	-1.36167	0.106438	-0.136983	0.0261968	-0.395986	-0.262789	0.0497502	0.0678963	0.0978886	0.0305182	0.0372451
414899	BLID	0.255277	0.132903	1.92078	0.0547594	0.561513	49.1855	7.87177	0.0963901	-0.283403	1.81375	0.326896	3.65267	0.593379	-0.0592159	0.42378	0.132096	0.575355	0.0980421	0.0436584	0.0545913	0.163291	0.0248114	0.0272999
114771	PGLYRP3	0.244196	0.127223	1.91942	0.0549306	0.561513	46.2947	7.44805	0.114022	-0.823306	1.96673	0.83634	3.19607	0.781481	-0.160407	0.38685	0.262222	0.491068	0.180902	0.0379598	0.0386899	0.0983042	0.0236075	0.053586
26037	SIPA1L1	0.229645	0.119484	1.92197	0.0546091	0.561513	31.5321	5.84215	0.211251	0.340158	-0.382513	0.132499	1.99078	2.847	0.0904214	-0.121865	0.0269187	0.329211	0.589245	0.070661	0.101501	0.0412749	0.0273466	0.042837
9639	ARHGEF10	-0.210388	0.109548	-1.92051	0.0547938	0.561513	6.72694	4.28848	0.368369	-0.219225	-0.87094	-2.69571	0.463684	-0.539529	-0.0737324	-0.309303	-0.454468	0.114872	-0.111467	0.113119	0.126122	0.0284224	0.0613736	0.0426841
115677	NOSTRIN	0.250486	0.130579	1.91827	0.0550774	0.562272	41.1756	6.7999	0.146848	0.710163	2.88734	-0.0838331	2.14998	-0.101365	0.173101	0.687222	-0.0271573	0.374723	-0.0188895	0.0594132	0.0566498	0.10494	0.0303775	0.0347269
51479	ANKFY1	-0.299497	0.156131	-1.91824	0.0550803	0.562272	60.1641	10.0412	0.0397395	0.237702	-4.09635	-0.474699	-1.21386	-1.31462	0.0560098	-0.829691	-0.098766	-0.286961	-0.29218	0.0555215	0.041024	0.043289	0.0558865	0.0493967
4190	MDH1	-0.177312	0.0924921	-1.91705	0.0552318	0.562663	0	1.98397	0.738708	-1.72134	-1.06252	-0.359658	-1.13995	-0.371785	-0.329	-0.259485	-0.0589751	-0.402991	-0.0708201	0.0365308	0.0596413	0.026888	0.124973	0.0362852
55288	RHOT1	-0.214798	0.112032	-1.9173	0.0551995	0.562663	0	2.27391	0.685524	0.218612	-1.4991	-1.41372	-1.18558	-0.50067	0.0568252	-0.436453	-0.31432	-0.335645	-0.11093	0.0675666	0.0847646	0.0494328	0.0801496	0.0490901
215	ABCD1	0.216485	0.11292	1.91715	0.0552184	0.562663	0	3.03841	0.551418	0.697978	1.95994	0.0396237	0.257539	1.52231	0.241559	0.652262	0.00892301	0.068268	0.292446	0.119774	0.110753	0.0507123	0.0702667	0.0369049
5449	POU1F1	-0.160759	0.0839411	-1.91514	0.0554742	0.563206	0	1.91207	0.751926	-1.89799	-1.21177	-0.59095	-0.0998433	-0.387188	-0.326354	-0.222942	-0.132759	-0.0175847	-0.0752082	0.029566	0.0338487	0.0504689	0.0310193	0.0377299
157574	FBXO16	0.159536	0.0832899	1.91543	0.0554376	0.563206	0	3.14078	0.534549	-0.423033	1.31385	1.23977	1.78738	0.415598	-0.0825414	0.287278	0.271228	0.293168	0.0666324	0.038071	0.0478091	0.0478613	0.0269029	0.0257054
3687	ITGAX	0.366376	0.19126	1.9156	0.0554165	0.563206	55.6765	9.02456	0.0604886	0.968148	-0.0687774	2.18659	-0.134245	3.58321	0.212455	-0.0198259	0.77885	-0.0496007	0.8482	0.048156	0.0830951	0.126874	0.136516	0.0560341
55622	TTC27	-0.243466	0.127097	-1.9156	0.0554164	0.563206	38.12	6.46413	0.167065	0.304071	-1.34263	-3.10246	-0.0566331	-1.19949	0.064762	-0.328118	-0.606913	-0.0144881	-0.261277	0.0453618	0.0597239	0.0382686	0.065446	0.0474468
4795	NFKBIL1	0.265489	0.138572	1.9159	0.0553779	0.563206	50.4126	8.06657	0.08917	-0.429726	0.406814	1.00736	1.18913	4.0289	-0.114701	0.116142	0.252588	0.200219	0.662577	0.0712451	0.081505	0.0628724	0.0283499	0.0270458
57134	MAN1C1	-0.216301	0.112973	-1.91462	0.0555406	0.563497	0	2.9889	0.559685	-1.55671	-0.575265	-0.220878	-1.9618	-0.054458	-0.433186	-0.193556	-0.0516628	-0.455067	-0.0122568	0.0774344	0.113208	0.054708	0.0538073	0.0506562
4329	ALDH6A1	-0.203682	0.106407	-1.91418	0.0555968	0.563683	0	1.16346	0.884077	0.164229	-0.791759	-0.865513	-0.894369	-1.62009	0.0506697	-0.28605	-0.168182	-0.199552	-0.333615	0.0951911	0.130526	0.0377583	0.0497829	0.0424046
80143	SIKE1	-0.195961	0.102405	-1.91358	0.055674	0.564082	18.7101	4.92066	0.295536	0.715412	-1.29836	-1.16688	-0.49104	-2.40715	0.198806	-0.386108	-0.194532	-0.0812058	-0.477132	0.077223	0.0884362	0.0277926	0.0273489	0.039289
727800	RNF208	0.189035	0.0988099	1.91311	0.0557336	0.564191	16.029	4.76355	0.31243	0.557493	1.37325	-0.869053	2.17032	1.33034	0.12792	0.323908	-0.174698	0.329757	0.297794	0.0526499	0.0556345	0.0404095	0.0230855	0.0501076
1549	CYP2A7	0.194766	0.101817	1.9129	0.0557605	0.564191	0	3.9197	0.416983	-0.1481	1.87549	1.3491	1.48917	-0.0426866	-0.0442445	0.59775	0.432679	0.23569	-0.00840877	0.0892506	0.10158	0.10286	0.0250492	0.0388045
84525	HOPX	-0.194452	0.101705	-1.91192	0.055886	0.564312	0	3.07274	0.545726	-1.20634	-1.59496	0.698445	-1.10896	-1.0057	-0.269747	-0.339492	0.169216	-0.349305	-0.191821	0.0500008	0.0453063	0.0586972	0.0992143	0.0363795
79722	ANKRD55	-0.228416	0.119459	-1.91209	0.0558641	0.564312	0	2.81993	0.588398	-0.597414	-1.03624	-1.18997	-1.8983	0.160528	-0.140562	-0.304474	-0.382877	-0.521215	0.038369	0.0553583	0.0863337	0.103525	0.0753886	0.0571293
8392	OR3A3	0.217843	0.113916	1.91231	0.055837	0.564312	21.6115	5.10279	0.276912	-0.362095	0.85283	1.36217	2.76061	0.219454	-0.0735814	0.205053	0.473002	0.454476	0.0539508	0.0412944	0.0578106	0.120577	0.0271026	0.0604379
137872	ADHFE1	-0.210141	0.110049	-1.90952	0.0561956	0.566414	0	1.63417	0.802638	-1.57692	-0.493851	-0.232367	-1.54613	-0.324551	-0.39066	-0.134602	-0.0607253	-0.346561	-0.0759307	0.0613732	0.0742865	0.068295	0.0502419	0.0547356
55177	RMDN3	-0.200292	0.10488	-1.90973	0.0561685	0.566414	10.624	4.47547	0.345466	0.576318	-1.39493	-0.487163	-1.13868	-2.17736	0.140399	-0.342755	-0.0808717	-0.360028	-0.440809	0.0593475	0.0603758	0.0275578	0.0999701	0.0409864
54586	EQTN	0.227663	0.119231	1.90942	0.0562082	0.566414	35.9363	6.24378	0.181667	0.837551	0.529551	-0.85571	3.25207	1.15684	0.199252	0.109683	-0.322127	0.565708	0.189631	0.0565958	0.0429009	0.141711	0.0302597	0.0268703
2992	GYG1	0.29487	0.154487	1.9087	0.0563002	0.566959	31.4117	5.8319	0.212059	1.62049	-0.572315	3.31121	-0.144865	0.57117	0.411861	-0.186917	0.608757	-0.0651477	0.18896	0.064596	0.106667	0.0337998	0.202242	0.109448
1113	CHGA	0.203065	0.106409	1.90835	0.0563455	0.567031	3.00946	4.12411	0.389469	1.45237	0.494381	-1.18173	1.95806	0.644805	0.352771	0.154095	-0.434461	0.335837	0.133328	0.0589967	0.0971524	0.135165	0.0294174	0.042755
126820	WDR63	0.18332	0.0962171	1.90527	0.0567449	0.567306	0	3.79687	0.434193	-0.170219	-0.264032	0.572186	2.26344	1.37029	-0.0362261	-0.0627732	0.209745	0.400743	0.254876	0.0452928	0.0565245	0.134372	0.0313468	0.0345966
9967	THRAP3	-0.215364	0.112931	-1.90704	0.0565149	0.567306	29.523	5.67561	0.224719	0.898312	-0.985012	-0.989976	-1.35782	-2.59824	0.238675	-0.352956	-0.137765	-0.281864	-0.501015	0.0705927	0.128398	0.0193656	0.0430919	0.0371829
80895	ILKAP	-0.203379	0.106635	-1.90725	0.0564882	0.567306	28.8979	5.62572	0.228898	0.741498	-0.92029	-2.08267	-0.229363	-2.40434	0.166208	-0.236958	-0.321184	-0.0477056	-0.45449	0.0502442	0.066297	0.023783	0.0432606	0.0357319
26040	SETBP1	0.26788	0.140529	1.90623	0.0566207	0.567306	43.7285	7.1084	0.13027	0.0873924	1.09776	3.73207	0.0541699	0.727959	0.02325	0.325211	0.674753	0.0147205	0.144079	0.070778	0.0877636	0.0326881	0.0738467	0.0391732
4717	NDUFC1	-0.181997	0.0955409	-1.90491	0.0567915	0.567306	0	2.23303	0.692986	-0.35638	0.155393	-2.17567	-0.797965	-0.583352	-0.079082	0.0455374	-0.366545	-0.235077	-0.105035	0.0492413	0.0858764	0.0283837	0.0867865	0.0324195
83850	ESYT3	0.155254	0.0814889	1.90522	0.0567513	0.567306	0	2.14881	0.70841	0.570278	0.94903	1.38605	1.58706	-0.336031	0.122846	0.199134	0.230378	0.25762	-0.0592357	0.0464032	0.044028	0.0276264	0.0263494	0.0310749
43	ACHE	0.199601	0.104758	1.90535	0.0567342	0.567306	0	1.05504	0.901339	1.14885	0.631926	1.05842	1.35825	0.0334536	0.280463	0.157966	0.363576	0.238562	0.00800863	0.0595964	0.0624875	0.117998	0.0308491	0.0573101
4607	MYBPC3	0.244727	0.128471	1.90492	0.0567903	0.567306	33.0945	5.97859	0.200753	1.20672	0.766244	2.992	0.0963817	0.222396	0.2967	0.219248	0.712409	0.0235344	0.0404707	0.0604534	0.0818722	0.056694	0.0596233	0.0331152
57534	MIB1	-0.20858	0.109358	-1.90731	0.0564809	0.567306	14.1951	4.66174	0.323798	0.0167984	-0.230435	-2.04381	0.339481	-2.22998	0.00505127	-0.081089	-0.389931	0.0680135	-0.41337	0.0904201	0.123831	0.0363996	0.0401384	0.0343618
84108	PCGF6	-0.187152	0.0981792	-1.90623	0.0566206	0.567306	0	1.89415	0.75522	0.0638101	-0.818628	-0.521091	-0.823977	-1.97564	0.0172749	-0.27893	-0.103835	-0.150199	-0.385932	0.0732915	0.116096	0.0397063	0.0332278	0.0381598
1618	DAZL	0.275358	0.144505	1.90553	0.0567118	0.567306	70.9023	13.7468	0.00814858	2.41281	1.03474	4.68091	1.95363	-1.45055	0.484027	0.238759	0.551339	0.299176	-0.29502	0.0402433	0.0532426	0.0138732	0.0234514	0.0413653
90139	TSPAN18	-0.236075	0.124017	-1.90356	0.0569674	0.56772	21.1506	5.07296	0.279893	-1.58163	-2.44913	-0.800075	0.139068	-0.399966	-0.454005	-0.679482	-0.204052	0.0322549	-0.0804716	0.0823973	0.0769722	0.0650459	0.0537947	0.0404798
6470	SHMT1	-0.173296	0.0910087	-1.90416	0.0568888	0.56772	0	3.14248	0.53427	0.599656	-0.744003	-1.85853	-1.07912	-1.11201	0.124489	-0.170787	-0.375639	-0.198979	-0.223913	0.0430983	0.0526942	0.0408511	0.0339995	0.0405455
117246	FTSJ3	0.19688	0.103421	1.90368	0.056952	0.56772	0	2.77448	0.596247	0.428966	-0.580165	1.40216	0.622983	1.87715	0.120354	-0.181671	0.297797	0.123292	0.39235	0.0787176	0.098055	0.045107	0.0391666	0.0436866
5116	PCNT	-0.301185	0.158234	-1.90342	0.0569853	0.56772	59.7511	9.93816	0.0414824	0.130822	0.390914	-4.16105	-0.993147	-2.5667	0.030206	0.0979844	-0.621137	-0.340208	-0.53188	0.0533118	0.0628277	0.0222828	0.117344	0.0429415
84910	TMEM87B	-0.186774	0.098197	-1.90203	0.0571671	0.56877	0	2.56778	0.632541	0.27383	-1.45978	-1.68445	-0.412738	-0.985814	0.075822	-0.431277	-0.334349	-0.0728133	-0.211655	0.0766707	0.0872847	0.0393988	0.0311224	0.0460963
57511	COG6	-0.240518	0.12645	-1.90208	0.0571601	0.56877	31.7625	5.86188	0.209703	0.132396	-0.153392	-0.167932	-1.91534	-2.86708	0.0291705	-0.0444107	-0.0460406	-0.386444	-0.592033	0.0485441	0.083824	0.0751645	0.0407083	0.0426395
103910	MYL12B	-0.33076	0.173961	-1.90135	0.0572564	0.569279	76.2586	16.8482	0.00206868	-3.10044	1.3227	-3.84473	-0.348584	-2.96181	-0.449257	0.215398	-0.600978	-0.142034	-0.596816	0.0209963	0.0265193	0.0244334	0.166024	0.0406038
26268	FBXO9	-0.234447	0.123445	-1.8992	0.0575379	0.569467	51.6657	8.2757	0.0819852	-0.882643	-2.43493	0.548868	-0.645538	-2.69048	-0.153454	-0.499592	0.0949971	-0.128713	-0.573954	0.0302265	0.0420978	0.029956	0.0397556	0.0455086
91452	ACBD5	-0.209107	0.110035	-1.90037	0.0573843	0.569467	39.3267	6.59268	0.159044	-1.81714	-2.30715	0.490362	-0.138771	-1.7509	-0.353648	-0.494449	0.103363	-0.0207382	-0.352635	0.0378761	0.0459295	0.0444323	0.0223327	0.0405631
80714	PBX4	-0.209365	0.110235	-1.89926	0.05753	0.569467	0	3.96162	0.411225	-0.408954	0.770429	-1.51081	-0.534111	-2.05918	-0.120286	0.24946	-0.36071	-0.11096	-0.454988	0.0865133	0.104843	0.0570031	0.0431587	0.0488218
23258	DENND5A	0.177321	0.093334	1.89985	0.0574528	0.569467	0	1.59476	0.809734	0.535611	0.976762	1.31044	-0.487596	1.41712	0.0897148	0.203462	0.257613	-0.200536	0.287379	0.0280563	0.0433901	0.0386458	0.169147	0.0411238
57722	IGDCC4	-0.189079	0.0995215	-1.89988	0.0574492	0.569467	1.90416	4.07765	0.3956	-0.395539	-0.277996	-2.55075	-0.3584	-0.935501	-0.104124	-0.0838689	-0.647988	-0.0602896	-0.179487	0.0692989	0.0910176	0.0645352	0.0282975	0.0368111
5618	PRLR	0.181306	0.0954659	1.89917	0.0575427	0.569467	15.7323	4.74678	0.31428	2.70324	1.0968	0.365036	0.62473	-0.221798	0.512107	0.221594	0.0936122	0.0992373	-0.044341	0.0358883	0.0408193	0.0657649	0.0252328	0.0399664
151651	EFHB	0.177039	0.0931419	1.90074	0.0573355	0.569467	0	1.75202	0.781248	0.225926	0.382376	0.0621193	0.996864	2.04206	0.0516856	0.090636	0.0237385	0.155335	0.370788	0.0523368	0.0561849	0.146033	0.0242811	0.0329697
5104	SERPINA5	0.177153	0.0933415	1.8979	0.0577089	0.570732	14.7839	4.69395	0.320165	0.4605	-0.00915906	2.64432	0.776845	1.02478	0.0991735	-0.00217644	0.684991	0.120769	0.155299	0.0463801	0.0564665	0.0671028	0.024168	0.0229658
10201	NME6	-0.182128	0.0959891	-1.89738	0.0577777	0.571034	10.4003	4.4643	0.346801	-2.07067	0.687023	-0.582622	-0.724695	-1.70113	-0.418133	0.160506	-0.096747	-0.163261	-0.352513	0.0407762	0.0545809	0.0275741	0.0507523	0.0429416
57142	RTN4	-0.166598	0.0878265	-1.8969	0.0578409	0.57128	0	3.76678	0.438487	-0.693765	-2.48976	-0.000680517	-0.325845	-0.76066	-0.125508	-0.47189	-0.000107856	-0.123209	-0.153845	0.0327278	0.0359223	0.0251196	0.142976	0.0409057
51760	SYT17	0.26483	0.139642	1.89649	0.0578954	0.571439	41.641	6.85413	0.1438	1.72758	2.21471	1.22072	1.53856	-0.948226	0.41517	0.596394	0.446164	0.257906	-0.204624	0.057753	0.0725158	0.133584	0.0280991	0.0465682
4983	OPHN1	0.1992	0.105084	1.89564	0.0580083	0.571796	25.8753	5.39631	0.248995	1.37236	1.72562	0.513766	2.1389	-0.957067	0.268086	0.371424	0.112746	0.368949	-0.207833	0.0381601	0.0463286	0.0481583	0.0297544	0.0471566
159090	FAM122B	-0.219501	0.115776	-1.8959	0.0579727	0.571796	31.4965	5.83912	0.211489	0.0151301	0.619313	-2.28037	-1.66761	-1.79951	0.00306799	0.153446	-0.423565	-0.489446	-0.320276	0.0411171	0.0613889	0.0345007	0.0861434	0.0316767
8321	FZD1	-0.245786	0.129696	-1.89509	0.0580804	0.572128	46.2919	7.44766	0.114039	-1.77958	1.35851	-2.4153	-1.27264	-1.63598	-0.473555	0.378073	-0.491379	-0.198002	-0.321398	0.0708116	0.0774504	0.0413895	0.0242062	0.0385948
56918	C2orf83	0.178723	0.0943882	1.89349	0.0582928	0.573841	0	3.95528	0.412092	1.21928	0.338634	0.0358487	2.419	-0.293987	0.283118	0.0852324	0.0123637	0.390136	-0.0527506	0.0539172	0.0633502	0.118947	0.0260112	0.0321958
10555	AGPAT2	0.183806	0.097107	1.89282	0.0583821	0.574342	0	2.45481	0.652746	0.723213	0.987177	1.71331	-0.613686	1.10813	0.18438	0.282088	0.297291	-0.148165	0.209243	0.0649975	0.0816545	0.0301086	0.0582905	0.0356548
8355	HIST1H3G	0.191297	0.101091	1.89232	0.0584482	0.574612	0	2.44842	0.653895	0.786675	0.588006	-0.158255	2.24472	0.0297207	0.174459	0.153087	-0.0342669	0.371083	0.0135016	0.0491809	0.0677814	0.046885	0.0273286	0.206373
22929	SEPHS1	-0.259804	0.137365	-1.89135	0.058578	0.575509	60.1316	10.033	0.0398751	-0.711574	-2.0368	-3.7395	-1.23618	0.862578	-0.13023	-0.425448	-0.580742	-0.291714	0.172327	0.0334953	0.0436313	0.0241178	0.0556868	0.0399126
55733	HHAT	-0.228294	0.120731	-1.89093	0.0586341	0.575583	48.3019	7.73723	0.101692	-0.715655	-1.59407	-0.819478	0.464801	-3.26527	-0.147587	-0.397764	-0.157167	0.0786326	-0.555127	0.0425294	0.0622638	0.0367832	0.0286201	0.0289033
6355	CCL8	0.30221	0.159845	1.89064	0.0586722	0.575583	46.4797	7.4738	0.11287	0.610539	2.53487	-1.32368	1.17315	2.64396	0.195753	0.695538	-0.537989	0.240662	0.495986	0.1028	0.0752887	0.165188	0.0420834	0.0351907
8888	MCM3AP	-0.151488	0.0801346	-1.89042	0.0587014	0.575583	0	3.79501	0.434458	0.187266	-1.31166	-2.16441	-0.941862	0.203586	0.0303689	-0.250691	-0.30083	-0.265051	0.0399773	0.0262992	0.0365291	0.0193181	0.0791929	0.0385595
84106	PRAM1	0.288234	0.152515	1.88987	0.058775	0.575925	28.78	5.6164	0.229686	1.09694	1.74867	2.49359	-0.375017	0.0484635	0.289877	0.503448	0.757403	-0.118368	0.013246	0.0698338	0.0828884	0.0922581	0.0996246	0.0747039
10000	AKT3	0.15617	0.0826988	1.88842	0.0589698	0.577075	0	0.74716	0.945388	0.635821	0.141819	1.34067	1.13978	0.890177	0.117162	0.0278887	0.233288	0.178336	0.215679	0.0339551	0.0386711	0.030279	0.0244814	0.0587031
94030	LRRC4B	0.166567	0.0881986	1.88854	0.0589531	0.577075	0	2.9162	0.571945	1.66329	0.626015	0.0511024	0.118683	1.8187	0.303263	0.121448	0.0149023	0.0187353	0.406551	0.0332433	0.0376369	0.0850398	0.0249196	0.0499698
4919	ROR1	-0.259599	0.137493	-1.88809	0.0590132	0.577122	53.6126	8.62304	0.0712442	-1.56434	-1.02974	-3.40348	0.107623	-0.267694	-0.371132	-0.238874	-0.712418	0.0173249	-0.0591078	0.0562851	0.0538131	0.043815	0.0259138	0.0487541
1272	CNTN1	0.150847	0.0799193	1.88748	0.0590952	0.577166	0	3.30985	0.507373	0.903067	2.31617	0.663879	0.0295682	0.500655	0.15568	0.42517	0.186856	0.00471503	0.0779136	0.0297185	0.0336964	0.0792201	0.0254284	0.0242186
2294	FOXF1	0.194571	0.103078	1.8876	0.0590791	0.577166	11.3142	4.5103	0.341327	-0.409461	-0.165069	0.497871	2.36607	1.70237	-0.0948942	-0.0378156	0.1701	0.39137	0.334302	0.0537098	0.0524822	0.116728	0.0273603	0.0385629
80206	FHOD3	-0.341431	0.181056	-1.88578	0.059325	0.579031	77.2548	17.5861	0.00148642	-2.75278	1.36355	-3.65036	-0.741709	-2.91865	-0.594571	0.270503	-0.734035	-0.123737	-0.549853	0.0466515	0.039355	0.0404355	0.0278312	0.0354919
7004	TEAD4	0.201093	0.106654	1.88546	0.0593671	0.579062	41.8019	6.87308	0.142749	2.10914	-1.29481	1.85136	1.2399	1.56523	0.357053	-0.261742	0.341821	0.218116	0.282291	0.0286585	0.0408631	0.034089	0.030946	0.0325268
23135	KDM6B	0.225853	0.11985	1.88447	0.0595021	0.579999	0	3.5548	0.469595	0.660789	1.18596	0.94973	-0.821876	1.91974	0.18028	0.384188	0.272795	-0.239383	0.402518	0.074434	0.104942	0.0825038	0.0848351	0.043963
92259	MRPS36	0.196026	0.104045	1.88406	0.0595575	0.58016	0	1.08486	0.896667	1.68698	0.400679	0.329341	0.57984	1.08784	0.3712	0.120977	0.0930262	0.109246	0.242962	0.048417	0.0911611	0.0797846	0.035497	0.0498819
23022	PALLD	-0.20612	0.109442	-1.88337	0.0596499	0.58068	3.21577	4.1329	0.388318	-1.20742	-0.700953	-2.38864	0.254284	-0.273877	-0.32543	-0.220925	-0.538806	0.0680496	-0.0505627	0.0726432	0.0993376	0.0508822	0.0716163	0.034084
11238	CA5B	-0.282153	0.149859	-1.88279	0.0597292	0.581074	46.902	7.53324	0.110252	-2.08904	0.816022	-2.77746	-1.04451	-0.694911	-0.455898	0.196721	-0.695305	-0.288648	-0.167039	0.0476257	0.0581165	0.0626694	0.076368	0.0577797
57630	SH3RF1	-0.17175	0.091274	-1.8817	0.0598766	0.581441	0	3.41223	0.491349	0.0163797	0.0504444	-1.31194	-0.280116	-2.26948	0.0043632	0.0141654	-0.220266	-0.0492653	-0.449821	0.0709577	0.0788559	0.0281882	0.0309319	0.0392849
3308	HSPA4	-0.222358	0.118172	-1.88165	0.059884	0.581441	30.0185	5.71579	0.221402	0.404461	-0.559818	-0.479944	-1.25734	-2.97982	0.124578	-0.20553	-0.0746626	-0.234842	-0.603208	0.0948704	0.13479	0.0242005	0.0348858	0.0409783
23074	UHRF1BP1L	0.176928	0.094002	1.88217	0.0598133	0.581441	0	1.3344	0.855513	-0.273707	0.757187	1.06556	0.931062	1.49212	-0.0711448	0.257238	0.188882	0.163737	0.295231	0.0675637	0.115415	0.0314215	0.030927	0.0391486
8148	TAF15	-0.358541	0.190934	-1.87782	0.0604052	0.586119	71.9093	14.2396	0.00656836	-0.868284	0.289603	-5.60944	-0.972272	-1.50042	-0.194354	0.0847433	-0.938738	-0.305636	-0.278309	0.0501029	0.0856256	0.0280059	0.0988174	0.0344056
5981	RFC1	-0.187963	0.100119	-1.8774	0.0604627	0.586295	18.448	4.90485	0.297201	0.271019	-2.35893	-1.13699	-0.105168	-1.47575	0.0495993	-0.482695	-0.198958	-0.0224566	-0.375071	0.0334929	0.0418712	0.0306205	0.0455952	0.0645958
6750	SST	0.265172	0.14127	1.87706	0.06051	0.586373	62.8543	10.7684	0.029294	1.13405	2.54975	0.903032	3.44813	-1.04045	0.205629	0.469671	0.222582	0.58774	-0.200256	0.032878	0.0339307	0.0607541	0.0290538	0.0370454
7414	VCL	-0.19175	0.102278	-1.87479	0.0608211	0.586395	0	2.11617	0.714402	-1.17968	-0.934728	0.354381	-1.12898	-1.40195	-0.21039	-0.237538	0.0799271	-0.404869	-0.30422	0.0318069	0.0645798	0.0508683	0.128604	0.0470879
3077	HFE	0.177556	0.0946903	1.87513	0.0607754	0.586395	8.31274	4.36266	0.359145	1.68553	-0.577772	1.0231	0.377425	1.95324	0.333361	-0.127076	0.274478	0.0607295	0.397113	0.0391162	0.0483739	0.0719747	0.0258903	0.0413349
2912	GRM2	-0.201036	0.107283	-1.87389	0.0609451	0.586395	0	2.21492	0.696299	-0.710468	0.21579	-1.74535	-1.37573	-0.48598	-0.183033	0.0690739	-0.471661	-0.294882	-0.0942299	0.06637	0.102463	0.0730288	0.0459441	0.0375959
231	AKR1B1	-0.24625	0.131407	-1.87395	0.060937	0.586395	47.3708	7.60034	0.107365	-2.71968	-0.00266514	-2.43161	-1.14062	0.446127	-0.476878	-0.00058792	-0.493199	-0.358438	0.085008	0.0307454	0.0486627	0.0411393	0.0987517	0.036308
810	CALML3	0.290538	0.155036	1.87401	0.0609293	0.586395	63.0911	10.8375	0.0284524	0.0712439	2.91693	2.40937	2.1896	-0.716828	0.0177559	0.683241	0.586587	0.354979	-0.132626	0.062114	0.054865	0.0592729	0.0262829	0.0342318
79145	CHCHD7	-0.18223	0.0971479	-1.8758	0.0606827	0.586395	0	2.82737	0.587118	0.311541	-0.702401	-2.21411	-0.829607	-0.406232	0.0661052	-0.183887	-0.374022	-0.21445	-0.092835	0.0450237	0.0685384	0.0285361	0.06682	0.0522246
151827	LRRC34	-0.44541	0.237595	-1.87466	0.0608393	0.586395	84.0051	25.008	5.01249e-05	-1.35564	-0.632342	-1.02237	-1.0569	-7.52531	-0.314878	-0.180989	-0.233223	-0.198489	-1.2119	0.0539505	0.0819221	0.0520388	0.0352702	0.0259347
23116	TOGARAM1	-0.220205	0.117451	-1.87487	0.0608106	0.586395	23.1064	5.202	0.267192	0.26403	-0.608945	-0.48682	-0.679138	-3.02448	0.0833595	-0.222434	-0.0883211	-0.135148	-0.586697	0.0996794	0.133428	0.0329148	0.0396006	0.0376293
56942	CMC2	-0.243193	0.129707	-1.87494	0.0608004	0.586395	44.6276	7.22381	0.124523	0.098114	-1.08063	-3.4697	-1.1802	-0.0766908	0.0175046	-0.227401	-0.588239	-0.373728	-0.0193774	0.0318305	0.0442824	0.0287424	0.100276	0.0638416
7707	ZNF148	-0.201927	0.107596	-1.87672	0.0605569	0.586395	0	0.798299	0.938676	-0.728154	-0.568462	-0.309286	-0.869667	-1.61711	-0.169978	-0.152241	-0.0705914	-0.307686	-0.311789	0.0544929	0.0717234	0.0520935	0.125173	0.0371744
51601	LIPT1	-0.192875	0.102916	-1.87411	0.0609157	0.586395	0	2.0276	0.730681	-1.53212	-0.23647	-1.40932	0.000615561	-1.07256	-0.361925	-0.0714105	-0.325089	0.000119768	-0.237942	0.0558024	0.0911954	0.0532088	0.0378564	0.0492149
6822	SULT2A1	0.16965	0.0905904	1.87271	0.0611079	0.586464	0	1.8538	0.762627	0.947903	0.583008	1.44604	1.42236	-0.0910829	0.211989	0.130723	0.392007	0.225156	-0.0170752	0.0500146	0.0502755	0.0734899	0.0250582	0.0351446
285598	ARL10	0.163568	0.0873227	1.87315	0.0610482	0.586464	0	3.81351	0.431833	0.055298	-0.452501	1.03518	1.29338	2.09044	0.0118382	-0.093336	0.224831	0.206139	0.415989	0.04583	0.0425462	0.0471712	0.0254018	0.0395994
9444	QKI	-0.186242	0.0994251	-1.87318	0.0610428	0.586464	0	3.11617	0.538576	-0.260677	-0.899266	-2.1873	-0.948614	0.253375	-0.0836209	-0.358348	-0.402307	-0.174116	0.049785	0.102902	0.158793	0.0338296	0.0336899	0.0386073
29088	MRPL15	-0.171717	0.091695	-1.8727	0.0611097	0.586464	0	1.15841	0.884897	-0.666191	-0.919681	-0.515736	-0.768751	-1.58708	-0.136492	-0.255116	-0.0773796	-0.188498	-0.345823	0.0419774	0.0769488	0.0225111	0.0601231	0.0474797
2906	GRIN2D	0.210046	0.112185	1.87233	0.0611611	0.58658	30.4663	5.7526	0.218402	0.742142	0.682023	-0.842139	1.63258	2.63864	0.149442	0.155432	-0.214215	0.277647	0.552375	0.0405481	0.0519375	0.0647044	0.0289227	0.0438236
26123	TCTN3	-0.17148	0.0916325	-1.87139	0.0612911	0.58673	1.41493	4.05741	0.398292	-2.27788	-0.364808	-1.33994	0.189086	-0.665679	-0.480378	-0.094072	-0.296177	0.0320175	-0.125562	0.0444737	0.0664956	0.0488576	0.0286718	0.0355787
7541	ZBTB14	-0.180633	0.0964998	-1.87185	0.0612271	0.58673	0	3.16256	0.531	-0.639744	-0.73419	0.381094	-1.1391	-2.06768	-0.12637	-0.166392	0.0817756	-0.272164	-0.430643	0.0390191	0.051363	0.0460451	0.0570866	0.043378
4691	NCL	-0.204351	0.109199	-1.87136	0.0612948	0.58673	0	1.24997	0.869805	-0.577236	-0.823458	0.0290083	-1.21797	-1.50213	-0.108922	-0.194788	0.0108147	-0.393488	-0.326786	0.0356058	0.0559551	0.13899	0.104374	0.0473273
774	CACNA1B	-0.278544	0.149033	-1.869	0.0616223	0.58916	54.4893	8.78914	0.0665916	0.385864	-0.0116727	-3.60549	-0.390026	-2.72388	0.100304	-0.00426178	-0.654495	-0.0826683	-0.475809	0.0675727	0.133302	0.0329523	0.0449252	0.0305132
79364	ZXDC	0.16129	0.0862991	1.86896	0.0616278	0.58916	0	2.25329	0.689285	0.752508	1.55655	0.184314	0.12647	1.64537	0.155969	0.323113	0.0326153	0.0243105	0.306658	0.0429593	0.0430907	0.0313129	0.03695	0.0347361
3684	ITGAM	0.259522	0.138929	1.86802	0.0617592	0.589229	9.47298	4.41857	0.352312	2.4838	-0.081378	1.42487	-0.324836	0.432177	0.590672	-0.0233626	0.462915	-0.141711	0.117539	0.0565533	0.0824194	0.105548	0.190318	0.0739676
5586	PKN2	-0.201197	0.107679	-1.86848	0.0616947	0.589229	0	0.629854	0.959689	-0.111867	-0.565845	-1.51435	-0.763814	-0.954841	-0.0327154	-0.211242	-0.30974	-0.17385	-0.194213	0.0855266	0.139369	0.0418351	0.0518051	0.0413707
57568	SIPA1L2	-0.210198	0.112556	-1.86749	0.0618326	0.589229	0	3.32462	0.505041	0.233859	-1.37269	-2.14597	-0.51396	-0.0617874	0.0597508	-0.447224	-0.396737	-0.184758	-0.0148993	0.06528	0.106146	0.0341787	0.129225	0.0581478
1465	CSRP1	0.212556	0.113805	1.86772	0.0618012	0.589229	19.1909	4.94994	0.292473	1.25858	2.48636	1.17252	-0.120168	-0.185525	0.282861	0.588889	0.243293	-0.0424214	-0.0342643	0.0505109	0.0560967	0.0430543	0.124621	0.0341099
84085	FBXO30	-0.326666	0.174848	-1.86829	0.0617215	0.589229	46.5403	7.48227	0.112494	1.079	-0.250694	-3.32213	-1.42682	-2.14565	0.344535	-0.106389	-0.523597	-0.402363	-0.738303	0.101958	0.180098	0.0248406	0.0795235	0.1184
53616	ADAM22	0.272329	0.145886	1.86672	0.0619405	0.589503	67.6401	12.361	0.0148594	4.87539	1.01489	1.0148	0.507441	0.206566	0.729021	0.16988	0.299203	0.0793305	0.0428844	0.0223594	0.0280185	0.0869314	0.0244404	0.0431004
3823	KLRC3	-0.188101	0.100756	-1.86689	0.0619163	0.589503	3.16377	4.13069	0.388608	-1.12679	-1.63791	1.37404	-1.22013	-0.702531	-0.216658	-0.331676	0.499252	-0.210954	-0.219428	0.0369713	0.0410061	0.132021	0.0298924	0.0975555
221143	EEF1AKMT1	-0.194206	0.104057	-1.86635	0.0619925	0.589621	18.358	4.89944	0.297772	-0.197341	0.782834	-2.72439	-1.17047	-0.719221	-0.0448932	0.229344	-0.436507	-0.246499	-0.146903	0.051752	0.0858296	0.0256711	0.0443513	0.0417191
64419	MTMR14	0.159967	0.085884	1.86259	0.0625195	0.589741	13.3956	4.6187	0.328703	0.380295	1.47512	0.614732	-0.491906	2.38198	0.055956	0.280349	0.0889753	-0.142554	0.455495	0.0216497	0.0361197	0.0209492	0.0839839	0.036567
29957	SLC25A24	0.160575	0.086123	1.86449	0.0622528	0.589741	0	1.65745	0.798432	0.22832	-0.222839	1.92253	1.03601	0.512406	0.0512173	-0.0628993	0.291525	0.167032	0.113344	0.0503204	0.079673	0.0229937	0.0259939	0.0489294
5467	PPARD	0.187836	0.100684	1.8656	0.062097	0.589741	22.5175	5.16246	0.271031	-0.0012591	1.64398	2.46603	-0.0395307	0.817072	-0.000232511	0.370145	0.501425	-0.00745884	0.158678	0.0341009	0.0506931	0.0413443	0.0356019	0.037715
391356	PTRHD1	-0.177251	0.0950426	-1.86497	0.062186	0.589741	0	1.77371	0.777289	-0.74298	0.381591	-0.837007	-0.925413	-1.73125	-0.168173	0.109699	-0.146215	-0.197209	-0.351234	0.0512338	0.0826428	0.0305157	0.0454132	0.0411601
200316	APOBEC3F	-0.165815	0.0889302	-1.86455	0.0622445	0.589741	0	2.55313	0.635149	-1.73384	0.151979	-1.63465	-0.550583	-0.158578	-0.313561	0.032609	-0.312416	-0.107732	-0.0348947	0.032706	0.0460372	0.036527	0.0382867	0.0484211
51602	NOP58	-0.199794	0.107256	-1.86278	0.0624929	0.589741	6.19	4.26394	0.371463	0.339171	-0.868908	-2.38634	-1.23562	0.0241596	0.0925988	-0.314626	-0.419733	-0.3447	0.00453841	0.0745374	0.131112	0.0309373	0.0778237	0.035288
23601	CLEC5A	0.274892	0.147576	1.86272	0.0625017	0.589741	0	3.46617	0.483041	1.20647	0.593441	2.23546	-0.0219748	0.361085	0.350871	0.215792	0.830982	-0.00609894	0.143727	0.0845793	0.132226	0.138181	0.0770296	0.158438
23509	POFUT1	0.178968	0.0960694	1.86291	0.0624755	0.589741	0	1.95607	0.743838	1.71104	0.496023	0.550052	-0.667363	1.22673	0.271855	0.106895	0.143966	-0.237251	0.246861	0.0252437	0.0464421	0.0685039	0.126384	0.0404955
1373	CPS1	0.344478	0.18475	1.86457	0.0622422	0.589741	77.2064	17.5488	0.00151153	2.36494	4.86559	-1.42453	2.66226	0.812572	0.466192	0.910798	-0.415747	0.442947	0.143475	0.0388588	0.0350407	0.0851751	0.0276824	0.0311764
222659	PXT1	0.163836	0.0878097	1.86581	0.0620684	0.589741	15.8851	4.7554	0.313328	2.22118	-0.00828838	0.380296	0.0623613	1.94745	0.457693	-0.00178343	0.0693468	0.00961636	0.312911	0.04246	0.0462992	0.0332513	0.0237789	0.0258173
116842	LEAP2	0.237468	0.127443	1.86332	0.0624168	0.589741	35.9359	6.24375	0.181669	1.09883	0.315138	-0.199915	0.844432	3.12839	0.26996	0.0930776	-0.0482895	0.141074	0.697185	0.0603581	0.0872345	0.0583465	0.0279102	0.0496655
7287	TULP1	-0.184867	0.0991891	-1.86378	0.0623527	0.589741	0	3.00471	0.557038	-1.65024	-1.5464	0.261902	0.0578611	-1.13657	-0.355078	-0.383257	0.103569	0.010435	-0.220286	0.0462971	0.0614239	0.156379	0.0325243	0.0375645
85440	DOCK7	-0.179575	0.0963896	-1.86302	0.0624598	0.589741	29.2692	5.65525	0.226416	-0.796107	0.552173	-2.86509	-0.374527	-1.35056	-0.15419	0.109371	-0.436497	-0.0636767	-0.272599	0.0375122	0.0392335	0.0232106	0.0289065	0.0407398
222068	TMED4	-0.239691	0.128718	-1.86214	0.0625837	0.589973	45.049	7.27922	0.121848	-3.12536	-0.330109	-1.32501	-1.25179	0.392443	-0.680784	-0.0936098	-0.223994	-0.301083	0.0725823	0.0474479	0.0804131	0.0285783	0.0578503	0.0342065
26998	FETUB	0.181314	0.0973916	1.8617	0.0626459	0.590186	0	3.59836	0.463081	0.0030946	2.06913	0.564833	1.55294	0.228707	0.000700878	0.58288	0.146158	0.289544	0.0420152	0.051295	0.0793567	0.0669579	0.0347631	0.0337484
5216	PFN1	0.233604	0.125542	1.86076	0.0627776	0.591053	53.4141	8.58629	0.0723143	0.924335	1.57683	-0.0942956	-0.403925	4.08896	0.129569	0.275622	-0.0222105	-0.159373	0.585819	0.0196492	0.0305532	0.0554797	0.155678	0.0205258
1381	CRABP1	0.169943	0.0914159	1.85901	0.0630264	0.592251	2.93782	4.12107	0.389869	1.26151	0.272845	-1.25333	0.928186	1.91504	0.235078	0.0666797	-0.479697	0.146332	0.33994	0.0347249	0.0597247	0.146489	0.0248548	0.0315101
58498	MYL7	0.21102	0.113563	1.85818	0.0631432	0.592251	27.6486	5.52857	0.23723	1.94355	0.790141	0.48533	2.36412	-0.816094	0.386605	0.212379	0.127872	0.407077	-0.169213	0.039568	0.0722463	0.0694185	0.0296493	0.0429921
7135	TNNI1	0.268221	0.144338	1.85828	0.0631289	0.592251	61.6502	10.4303	0.0337707	3.16196	2.0096	-0.0692674	2.93405	-1.0289	0.521383	0.439474	-0.0194862	0.457213	-0.219032	0.0271895	0.0478241	0.0791396	0.024283	0.0453172
5545	PRB4	0.224349	0.120715	1.8585	0.0630978	0.592251	36.7164	6.32076	0.17644	-0.129876	-0.631298	1.1603	2.61445	2.12415	-0.0266146	-0.166541	0.313177	0.418009	0.441887	0.0419933	0.0695939	0.0728517	0.0255629	0.0432766
80194	TMEM134	-0.321493	0.172914	-1.85926	0.0629898	0.592251	73.3556	15.0125	0.0046753	-1.74739	0.865193	-5.54988	-0.976147	-1.48565	-0.326324	0.202911	-0.799934	-0.254167	-0.298868	0.0348754	0.0550028	0.020775	0.0677967	0.0404693
26286	ARFGAP3	-0.174086	0.0936766	-1.85838	0.0631158	0.592251	0	1.17859	0.881611	-0.609236	0.242315	-1.42573	-1.17376	-0.889859	-0.149104	0.062333	-0.221372	-0.294448	-0.178764	0.0598976	0.0661721	0.0241084	0.0629307	0.0403568
1606	DGKA	-0.188326	0.101436	-1.8566	0.0633675	0.593234	0	0.633847	0.959229	-0.53611	-0.868485	-1.28997	-0.937997	-0.70377	-0.100532	-0.182919	-0.345137	-0.253948	-0.1632	0.0351641	0.0443603	0.0715857	0.073297	0.0537748
56906	THAP10	0.161071	0.0867545	1.85663	0.0633642	0.593234	6.44451	4.27554	0.369998	1.07104	1.14199	-1.01664	1.91229	0.939783	0.205923	0.228352	-0.213527	0.32438	0.164042	0.0369657	0.0399842	0.0441135	0.0287739	0.0304689
57122	NUP107	-0.191501	0.103135	-1.85681	0.0633382	0.593234	0	2.188	0.701226	-0.200077	-1.57775	-0.191341	-1.09531	-1.36752	-0.042695	-0.392029	-0.0385437	-0.289996	-0.332196	0.0455363	0.0617393	0.0405781	0.0700982	0.0590096
84072	HORMAD1	0.178633	0.0962293	1.85632	0.0634075	0.593236	0	0.775529	0.941698	0.928738	0.482907	1.39589	0.65454	0.865317	0.244425	0.123487	0.324838	0.100606	0.207048	0.0692634	0.0653903	0.0541539	0.0236252	0.0572523
55568	GALNT10	-0.251329	0.135423	-1.85588	0.0634703	0.593451	44.5212	7.20997	0.1252	0.414836	-1.57055	-2.00849	-0.292728	-2.26494	0.0856688	-0.429013	-0.471	-0.0481343	-0.638316	0.0426474	0.0746168	0.0549923	0.0270384	0.0794254
579	NKX3-2	0.165261	0.0890967	1.85485	0.0636174	0.594453	0	3.62901	0.458535	-0.134145	0.905973	1.00891	2.28291	-0.0333749	-0.029268	0.202052	0.19987	0.418283	-0.00613521	0.0476035	0.0497387	0.0392457	0.0335707	0.0337923
28981	IFT81	0.147649	0.079728	1.85191	0.0640383	0.594521	0	2.36138	0.669617	1.00625	-0.123991	0.173627	1.9621	0.939729	0.170119	-0.0227554	0.0322756	0.308022	0.195416	0.0285822	0.0336813	0.0345551	0.0246447	0.043243
146059	CDAN1	-0.196547	0.106045	-1.85344	0.0638197	0.594521	5.07481	4.21384	0.377838	-0.117656	-0.577696	-2.61404	-0.339794	-0.714288	-0.0215748	-0.142297	-0.615881	-0.133458	-0.145866	0.0336249	0.0606728	0.0555098	0.154261	0.0417027
84962	AJUBA	-0.364218	0.196642	-1.85218	0.0639995	0.594521	82.2634	22.5523	0.00015556	-5.23907	-0.477926	-3.27587	0.397619	-0.939788	-0.814463	-0.086597	-0.8727	0.0616915	-0.187199	0.0241677	0.0328311	0.0709702	0.0240723	0.0396776
8624	PSMG1	-0.244191	0.131767	-1.8532	0.0638538	0.594521	42.4299	6.94805	0.138659	0.39098	-0.649369	-3.22285	-1.18502	-0.791328	0.0818934	-0.152538	-0.685229	-0.26837	-0.18722	0.0438721	0.055179	0.0452053	0.0512882	0.0559745
3101	HK3	0.258919	0.139917	1.85052	0.0642392	0.594521	0	3.42077	0.490028	1.98246	0.578454	1.51685	-0.441855	0.290415	0.528613	0.171602	0.57257	-0.167104	0.0851109	0.0710995	0.0880053	0.142485	0.143026	0.0858881
10159	ATP6AP2	-0.272182	0.147022	-1.8513	0.0641262	0.594521	50.3214	8.05175	0.0897008	0.263448	-1.21853	-0.813959	-0.670948	-3.47913	0.0584108	-0.304828	-0.127305	-0.268556	-0.760276	0.049158	0.0625806	0.0244619	0.160211	0.047753
3934	LCN2	0.335612	0.181373	1.8504	0.0642566	0.594521	0	1.54315	0.818971	1.71275	0.542876	1.1454	0.00826941	0.653364	0.627577	0.216278	0.587443	0.00400678	0.222942	0.13426	0.158717	0.263037	0.23477	0.116432
2034	EPAS1	-0.223391	0.120568	-1.85282	0.0639079	0.594521	0	1.26478	0.867322	-0.829552	-1.20808	-0.387998	-0.177279	-1.53888	-0.216969	-0.386361	-0.0846469	-0.0653001	-0.384527	0.0684084	0.10228	0.0475951	0.13568	0.0624378
4803	NGF	-0.172823	0.0933338	-1.85166	0.0640742	0.594521	0	3.54572	0.470961	-2.23229	-1.07426	-0.116531	-0.471691	-0.775335	-0.611869	-0.284793	-0.0276879	-0.0734137	-0.145848	0.0751306	0.0702806	0.0564548	0.0242236	0.035385
64080	RBKS	0.280693	0.1514	1.85398	0.0637418	0.594521	54.1696	8.72784	0.0682742	1.34562	1.29655	3.21075	0.523649	-0.297877	0.331761	0.389392	0.828917	0.0985386	-0.0546578	0.0607861	0.090198	0.0666512	0.0354105	0.033669
80212	CCDC92	-0.182509	0.0984646	-1.85355	0.0638035	0.594521	0	3.64824	0.455699	-1.30696	-1.81509	-0.650358	-1.18944	0.493423	-0.321994	-0.428468	-0.116456	-0.310432	0.103214	0.0606978	0.0557237	0.0320643	0.0681165	0.0437559
84658	ADGRE3	0.309231	0.166895	1.85284	0.0639047	0.594521	36.9773	6.34692	0.174695	0.187632	0.60869	2.58332	0.0466893	2.00903	0.0431752	0.184217	1.01424	0.0148429	0.556186	0.0529489	0.0915944	0.154144	0.101066	0.0766419
80205	CHD9	-0.392482	0.212026	-1.85111	0.0641544	0.594521	80.4125	20.4212	0.00041231	-1.60934	0.868507	-6.3008	-0.894889	-2.36379	-0.305306	0.187396	-0.949353	-0.300749	-0.510683	0.0359892	0.0465556	0.022702	0.112946	0.046675
10342	TFG	-0.258595	0.139755	-1.85035	0.0642628	0.594521	40.4228	6.71398	0.151797	0.0534383	-1.41196	0.313896	-0.93663	-3.41088	0.0158526	-0.377844	0.068777	-0.277333	-0.575228	0.0880029	0.0716108	0.0480083	0.0876732	0.0284412
1604	CD55	-0.200948	0.10838	-1.85411	0.0637241	0.594521	0	3.33948	0.502702	0.00827732	-1.73418	0.574246	-0.301529	-1.83005	0.00190487	-0.507348	0.227986	-0.127542	-0.280272	0.0529602	0.0855903	0.157623	0.178915	0.023455
50840	TAS2R14	-0.187669	0.10132	-1.85224	0.0639913	0.594521	8.75855	4.38397	0.356528	1.03817	-1.12783	-1.55375	-1.84907	-0.491436	0.250701	-0.293426	-0.353201	-0.276381	-0.132113	0.0583148	0.0676873	0.0516749	0.0223413	0.0722699
23149	FCHO1	0.315505	0.170945	1.84565	0.0649435	0.596744	51.8337	8.30456	0.0810376	0.466905	2.04115	2.92868	-0.694132	1.2226	0.126252	0.618025	0.816597	-0.183897	0.26875	0.0731172	0.0916774	0.0777447	0.0701883	0.0483201
6677	SPAM1	-0.162247	0.0878843	-1.84615	0.064871	0.596744	0	1.15487	0.885472	-0.356646	-1.10116	-1.54671	-0.832349	-0.371854	-0.0728644	-0.255854	-0.321912	-0.131144	-0.076506	0.0417403	0.0539865	0.043317	0.024825	0.0423297
23584	VSIG2	0.181855	0.0984195	1.84775	0.064638	0.596744	0	2.30823	0.67927	0.402441	0.38063	-0.0461985	1.16682	2.01295	0.0875872	0.0921435	-0.0127088	0.205041	0.456264	0.047367	0.0586035	0.0756756	0.0308798	0.0513765
23020	SNRNP200	-0.171523	0.0928999	-1.84632	0.0648456	0.596744	0	1.443	0.836688	-0.336534	0.292023	-1.85018	-0.751474	-0.81577	-0.0852059	0.0908419	-0.295525	-0.156745	-0.154845	0.0641033	0.0967692	0.0255129	0.0435069	0.0360294
9517	SPTLC2	-0.221519	0.119957	-1.84666	0.0647969	0.596744	24.904	5.32651	0.255405	-0.245005	-0.470639	-2.74079	-1.45122	0.166847	-0.0553334	-0.160721	-0.588872	-0.324723	0.0334497	0.0510067	0.116619	0.0461627	0.0500677	0.0401929
51244	CCDC174	-0.176469	0.0954961	-1.84792	0.0646143	0.596744	6.39472	4.27326	0.370285	-1.70613	-0.749877	-1.64391	-1.04834	0.832299	-0.36259	-0.183977	-0.259085	-0.294021	0.160428	0.0451656	0.0601931	0.0248386	0.0786593	0.0371534
79650	USB1	0.333355	0.180616	1.84565	0.0649427	0.596744	68.6338	12.7526	0.0125503	1.41454	-0.0494207	5.13646	-0.26393	1.80451	0.313542	-0.0129648	0.851794	-0.0752535	0.401368	0.0491314	0.0688195	0.0275005	0.0812975	0.0494729
130574	LYPD6	0.269538	0.145912	1.84727	0.0647084	0.596744	55.1875	8.92608	0.0629739	0.422885	0.590769	3.77477	0.743396	0.61579	0.0922925	0.164928	0.890106	0.156607	0.104065	0.047631	0.0779386	0.0556035	0.0443793	0.0285589
6233	RPS27A	-0.144824	0.078412	-1.84696	0.0647524	0.596744	0	0.341215	0.987001	-1.21844	-0.61937	-1.10338	-0.677925	-0.455247	-0.184102	-0.0971479	-0.162378	-0.262206	-0.0904456	0.0228302	0.0246017	0.0216572	0.149596	0.0394712
6011	GRK1	0.207582	0.112356	1.84754	0.0646683	0.596744	28.2337	5.57365	0.233331	0.014912	1.62924	1.82158	2.06519	-0.692232	0.00396917	0.405784	0.389779	0.338789	-0.138465	0.0708477	0.0620322	0.0457866	0.0269117	0.0400106
55041	PLEKHB2	-0.250724	0.135752	-1.84693	0.0647573	0.596744	43.2516	7.04866	0.133339	-0.551626	-0.470542	0.118285	-1.25189	-3.32499	-0.147386	-0.139739	0.0201113	-0.315774	-0.648441	0.071388	0.0881938	0.0289083	0.0636234	0.0380331
6590	SLPI	0.303651	0.164549	1.84536	0.0649859	0.596765	0	0.746414	0.945484	1.0737	1.36372	0.775612	0.326946	0.656287	0.342009	0.525865	0.365692	0.106103	0.260269	0.101464	0.148695	0.222302	0.105318	0.157274
6369	CCL24	0.164473	0.089172	1.84445	0.0651172	0.5969	0	3.00253	0.557402	0.917724	0.432996	1.82099	1.33561	-0.524367	0.163148	0.0943008	0.450766	0.213168	-0.125497	0.0316037	0.047431	0.0612756	0.0254732	0.0572791
26227	PHGDH	-0.264595	0.143456	-1.84443	0.0651208	0.5969	44.031	7.14681	0.128331	-1.38117	0.856393	-0.635081	-0.947632	-3.44861	-0.347412	0.22567	-0.182622	-0.237518	-0.593453	0.0632698	0.0694384	0.0826894	0.0628224	0.0296131
11047	ADRM1	0.171887	0.0931901	1.84448	0.0651131	0.5969	0	2.40291	0.662102	0.710432	1.68094	1.17504	-0.649582	0.819804	0.160698	0.345066	0.224073	-0.18239	0.145628	0.0511654	0.0421406	0.0363643	0.078838	0.0315549
10455	ECI2	-0.232027	0.125838	-1.84385	0.0652044	0.597299	51.5423	8.25462	0.0826842	0.904255	-2.25266	-1.00242	-1.0187	-2.62171	0.175402	-0.573106	-0.153638	-0.221768	-0.475654	0.0376259	0.064726	0.023491	0.0473922	0.0329165
23157	2019-09-06	-0.190954	0.103664	-1.84205	0.0654676	0.597946	0	1.97578	0.740213	-1.5905	-1.14592	-0.329037	-1.17758	-0.176514	-0.368975	-0.311221	-0.0673299	-0.328776	-0.0358764	0.0538179	0.0737615	0.0418722	0.0779508	0.0413104
25836	NIPBL	-0.255126	0.138546	-1.84146	0.0655541	0.597946	61.9498	10.5124	0.0326263	0.638762	-3.26338	-2.50808	-1.30595	-0.236416	0.108566	-0.614092	-0.418126	-0.341916	-0.0446925	0.0288875	0.0354105	0.0277928	0.0685461	0.0357368
6651	SON	-0.188583	0.102436	-1.84097	0.0656253	0.597946	0	0.659238	0.956259	-0.380588	-0.954807	-1.35651	-0.89472	-0.592689	-0.0977742	-0.299051	-0.254309	-0.275046	-0.106588	0.0659991	0.0980976	0.0351461	0.0945009	0.032342
4820	NKTR	-0.286779	0.1558	-1.84069	0.065667	0.597946	57.1857	9.34267	0.0530823	-1.08366	-0.546027	-4.16802	-0.824555	0.136569	-0.219271	-0.124961	-0.747447	-0.319023	0.0290623	0.0409424	0.0523745	0.0321589	0.149694	0.0452855
51605	TRMT6	-0.194456	0.105586	-1.84168	0.0655214	0.597946	6.37379	4.27231	0.370406	0.555309	-1.06243	-2.4099	-0.547449	-0.640058	0.153836	-0.343832	-0.495926	-0.099085	-0.142369	0.0767443	0.104734	0.0423481	0.0327588	0.0494754
10929	SRSF8	-0.352724	0.191632	-1.84063	0.0656762	0.597946	66.7217	12.0199	0.0172042	-0.528656	0.543327	-5.36061	-1.045	-1.68561	-0.12416	0.158748	-0.814756	-0.410154	-0.413855	0.055159	0.0853682	0.0231008	0.154049	0.0602812
8731	RNMT	-0.16564	0.089938	-1.84171	0.0655175	0.597946	0	1.7343	0.784478	-1.64754	0.167659	-0.959417	-1.12023	-0.456419	-0.320776	0.0406784	-0.136774	-0.310898	-0.107364	0.0379082	0.0588672	0.0203232	0.0770235	0.0553338
84549	MAK16	-0.174987	0.0949655	-1.84264	0.0653823	0.597946	0	0.361271	0.985523	-0.606404	-1.01297	-0.78415	-0.94272	-0.92689	-0.127502	-0.330472	-0.134952	-0.21176	-0.184326	0.0442087	0.106432	0.0296182	0.0504569	0.0395471
50836	TAS2R8	0.170499	0.0925079	1.84308	0.0653179	0.597946	0	0.245604	0.99305	0.722742	0.807502	0.325101	1.43092	0.561161	0.148006	0.19845	0.163668	0.216829	0.104286	0.0419367	0.0603973	0.25345	0.0229617	0.0345367
51506	UFC1	-0.217521	0.118143	-1.84117	0.0655967	0.597946	38.8439	6.54064	0.162248	-2.65739	0.903745	-0.707183	-1.06628	-1.7693	-0.474047	0.193106	-0.127017	-0.340164	-0.334387	0.0318223	0.0456561	0.0322597	0.101774	0.0357185
1739	DLG1	-0.162258	0.0881704	-1.84028	0.0657278	0.598051	2.19799	4.0899	0.393977	-0.213016	-0.872517	-0.980347	0.361516	-2.38064	-0.0470394	-0.2309	-0.18776	0.0615655	-0.400465	0.0487642	0.0700328	0.0366815	0.0290014	0.028297
8447	DOC2B	0.194487	0.105704	1.83992	0.0657803	0.598163	0	0.963678	0.915253	0.140185	1.02324	0.370023	1.72144	0.426636	0.0362173	0.306525	0.102736	0.279204	0.121223	0.0667469	0.0897382	0.0770887	0.0263061	0.080733
83875	BCO2	0.266709	0.145	1.83937	0.0658611	0.598532	60.4636	10.1173	0.0384982	1.47874	1.31485	2.40066	2.76792	-1.34384	0.273704	0.27953	0.610071	0.473595	-0.28247	0.0342592	0.0451967	0.0645804	0.0292758	0.0441826
126299	ZNF428	-0.183878	0.100003	-1.83873	0.065955	0.598656	0	3.30205	0.508607	-1.25992	0.070358	-1.99084	-1.0247	0.27779	-0.24599	0.0174029	-0.380135	-0.342487	0.0605657	0.0381194	0.0611809	0.0364588	0.111711	0.0475359
27128	CYTH4	0.288721	0.157009	1.83888	0.0659329	0.598656	48.4273	7.75604	0.100935	-0.207964	2.47052	0.318103	-0.0712062	3.23393	-0.0450137	0.584551	0.0976408	-0.027178	0.603885	0.0468504	0.0559843	0.0942167	0.14568	0.0348695
54552	GNL3L	-0.343522	0.186917	-1.83784	0.0660865	0.598755	64.9844	11.4235	0.0221953	-1.53329	-1.28902	-4.51403	-0.56029	0.555394	-0.465543	-0.393938	-0.738819	-0.188277	0.108976	0.092187	0.0933975	0.0267884	0.112919	0.0385001
55582	KIF27	-0.170055	0.0925249	-1.83794	0.0660712	0.598755	0	2.45846	0.65209	-0.455788	-2.16591	-0.452817	-0.498081	-0.696035	-0.0935307	-0.485294	-0.144835	-0.080247	-0.139642	0.0421098	0.0502032	0.102306	0.0259571	0.0402503
23328	SASH1	-0.215084	0.117006	-1.83824	0.0660272	0.598755	0	1.57663	0.812987	0.13445	-1.12956	-0.954885	-0.510725	-1.57769	0.0398904	-0.396046	-0.22442	-0.123797	-0.367544	0.0880268	0.122933	0.0552356	0.0587553	0.0542717
10660	LBX1	0.39845	0.216913	1.83691	0.0662229	0.599627	82.9488	23.4587	0.00010252	4.34947	3.89703	1.87558	1.16737	-1.57762	0.774558	0.711066	0.781862	0.175614	-0.305488	0.0317129	0.033293	0.173775	0.0226307	0.0374956
1195	CLK1	-0.215587	0.117507	-1.83468	0.0665537	0.600797	0	2.47338	0.649409	-0.418497	-1.08212	0.175802	-0.704238	-1.99159	-0.114201	-0.342237	0.0409342	-0.242779	-0.423293	0.0744658	0.100023	0.0542156	0.118846	0.0451733
140890	SREK1	-0.230687	0.125707	-1.83511	0.0664887	0.600797	47.6082	7.63478	0.105911	0.224028	-1.53175	-3.18974	-1.14396	-0.0399158	0.0465127	-0.35735	-0.62522	-0.232982	-0.00726195	0.0431061	0.0544268	0.0384199	0.0414787	0.0330992
10657	KHDRBS1	-0.166307	0.0905966	-1.83569	0.0664032	0.600797	0	3.46835	0.482708	-0.659361	0.519715	-2.22716	-0.70122	-0.825414	-0.127392	0.101469	-0.36678	-0.26114	-0.165979	0.0373284	0.0381183	0.0271212	0.138688	0.0404353
79927	FAM110D	0.208286	0.113492	1.83525	0.0664687	0.600797	33.713	6.03437	0.196596	1.1026	2.91207	0.695441	0.953753	-0.660283	0.219111	0.514222	0.188431	0.204478	-0.127352	0.0394909	0.0311815	0.0734149	0.0459645	0.0372005
51237	MZB1	0.345702	0.188407	1.83487	0.0665248	0.600797	58.1832	9.56553	0.0484181	0.0981195	1.82815	0.876904	-0.209904	3.92159	0.0290992	0.57334	0.285155	-0.0506248	0.829237	0.0879533	0.0983559	0.105745	0.0581679	0.0447128
8174	MADCAM1	0.205334	0.11196	1.83399	0.0666554	0.600987	30.653	5.7681	0.217149	0.405822	2.5361	1.81951	0.189976	0.289805	0.0799538	0.522275	0.565211	0.0291902	0.0657879	0.0388157	0.0424097	0.0964966	0.0236088	0.0515326
1780	DYNC1I1	0.170313	0.0928607	1.83407	0.0666435	0.600987	0	3.44886	0.485697	1.39588	-0.83174	0.405094	1.61382	1.18486	0.285932	-0.17726	0.1427	0.276371	0.224071	0.0419596	0.0454199	0.12409	0.0293276	0.0357629
27327	TNRC6A	-0.160662	0.0876456	-1.83309	0.0667889	0.601463	0	1.89173	0.755664	-0.464247	-0.657345	-2.01734	-0.515045	-0.519022	-0.0832936	-0.127976	-0.411633	-0.12073	-0.0939606	0.0321903	0.0379028	0.0416353	0.0549464	0.0327733
91748	ELMSAN1	-0.170834	0.093191	-1.83316	0.0667789	0.601463	0	0.960671	0.9157	-0.731103	0.113464	-1.11315	-1.21361	-1.03043	-0.137431	0.0289683	-0.20285	-0.289264	-0.211266	0.0353353	0.0651823	0.0332078	0.0568105	0.0420361
79012	CAMKV	0.173121	0.0945145	1.83168	0.0669988	0.602862	9.3352	4.41186	0.353127	0.181213	0.0401438	2.44703	1.45466	0.0943975	0.0438477	0.0121513	0.53047	0.236115	0.0151003	0.0585487	0.0916231	0.0469941	0.0263468	0.0255886
10927	SPIN1	-0.19976	0.109099	-1.83099	0.0671021	0.602862	7.96368	4.34611	0.361187	-0.760418	-1.06821	-2.2991	-0.791302	0.708851	-0.229187	-0.374186	-0.405582	-0.178105	0.150652	0.0908394	0.122706	0.03112	0.0506602	0.0451688
3476	IGBP1	-0.181099	0.0990366	-1.82861	0.0674581	0.602862	0	3.61681	0.46034	0.584522	-1.26134	-0.959209	-1.15738	-1.66384	0.111925	-0.297869	-0.190048	-0.368057	-0.359779	0.0366649	0.0557683	0.0392553	0.101129	0.0467572
22823	MTF2	-0.1975	0.108003	-1.82866	0.067451	0.602862	0	3.34245	0.502235	0.538852	-0.749034	-0.524445	-0.958275	-2.15446	0.137728	-0.237033	-0.11187	-0.253494	-0.438238	0.0653289	0.100141	0.0455014	0.0699769	0.0413756
26056	RAB11FIP5	-0.185103	0.101166	-1.8297	0.0672948	0.602862	6.70849	4.28764	0.368476	-0.751993	-0.113841	-2.3423	0.392371	-1.30059	-0.172458	-0.0304332	-0.459802	0.0772602	-0.288147	0.0525945	0.0714657	0.0385353	0.038772	0.0490847
6903	TBCC	-0.195626	0.106842	-1.83098	0.0671028	0.602862	14.7895	4.69426	0.320131	-1.16071	-1.6307	0.995767	-1.16273	-1.5103	-0.233731	-0.34524	0.216122	-0.309256	-0.329804	0.0405495	0.0448224	0.0471065	0.0707428	0.0476853
284114	TMEM102	0.182206	0.0996142	1.82912	0.0673815	0.602862	2.62827	4.10797	0.391591	0.863954	1.05384	1.59265	1.54766	-0.880447	0.203224	0.250968	0.449659	0.260505	-0.194845	0.0553308	0.0567134	0.0797125	0.028332	0.048975
2832	NPBWR2	0.174402	0.0953335	1.82939	0.0673415	0.602862	0	0.608214	0.962147	0.747593	0.525917	0.250733	1.28218	1.18851	0.187646	0.158873	0.0491893	0.21755	0.250668	0.0630014	0.0912572	0.0384873	0.0287887	0.0444832
51125	GOLGA7	-0.353251	0.193056	-1.82978	0.0672826	0.602862	74.9794	15.9868	0.00303689	-0.0577586	-0.681528	-1.2391	-1.0808	-5.11387	-0.0110023	-0.164665	-0.211237	-0.335536	-1.04544	0.0362853	0.0583762	0.029062	0.0963799	0.0417923
8802	SUCLG1	-0.167728	0.0917042	-1.82901	0.0673982	0.602862	0	1.3737	0.848753	-0.866531	0.0886331	-1.45778	-1.12097	-0.760613	-0.155167	0.0190191	-0.264351	-0.339743	-0.153014	0.0320651	0.0460455	0.0328835	0.0918561	0.0404699
51321	AMZ2	0.173403	0.0947134	1.83082	0.0671277	0.602862	0	2.38571	0.665212	1.21916	0.872153	0.590286	-0.777554	1.59298	0.222798	0.193373	0.140653	-0.224092	0.283658	0.0333967	0.0491594	0.0567769	0.08306	0.0317082
1262	CNGA4	0.446926	0.244418	1.82853	0.06747	0.602862	85.5496	27.6809	1.4475e-05	-1.01551	4.27891	0.725536	1.31769	6.00646	-0.207181	0.870264	0.253809	0.230882	1.02713	0.0416227	0.0413653	0.122376	0.0307007	0.0292426
133688	UGT3A1	0.169347	0.0925301	1.83018	0.0672226	0.602862	0	2.69977	0.609255	0.659713	0.225074	0.581636	2.28494	0.0646981	0.161555	0.055392	0.152318	0.38463	0.0111384	0.0599696	0.060568	0.0685807	0.0283357	0.0296387
886	CCKAR	0.160236	0.0877748	1.82554	0.06792	0.60316	0	1.6963	0.791389	1.28167	1.25503	1.06037	0.813719	-0.156864	0.282593	0.295493	0.216032	0.126283	-0.0310184	0.0486152	0.0554354	0.0415072	0.0240846	0.0391016
7071	KLF10	0.236601	0.129656	1.82484	0.0680254	0.60316	32.3665	5.91423	0.205646	-0.689199	-0.21672	2.08276	0.823304	2.55452	-0.21452	-0.0858289	0.409489	0.146409	0.555223	0.0968823	0.156844	0.0386549	0.0316239	0.0472408
117156	SCGB3A2	0.274835	0.150567	1.82533	0.0679507	0.60316	56.7927	9.25769	0.0549714	-0.135904	-0.114161	3.57025	2.33182	0.660647	-0.0319852	-0.0315025	0.804062	0.395287	0.144878	0.0553907	0.0761476	0.0507204	0.0287365	0.048091
338328	GPIHBP1	0.156739	0.0857552	1.82775	0.0675873	0.60316	0	0.298657	0.989901	1.17153	0.690595	0.94745	0.865105	0.37927	0.219622	0.141362	0.207043	0.132075	0.0852019	0.0351433	0.0419003	0.0477538	0.0233078	0.0504662
54738	FEV	0.228358	0.125132	1.82493	0.068011	0.60316	33.0088	5.97093	0.20133	0.923868	2.82402	0.995872	0.635802	-0.166726	0.245496	0.724457	0.284251	0.114082	-0.0321294	0.0706105	0.0658097	0.0814701	0.0321951	0.0371365
10949	HNRNPA0	-0.190161	0.104168	-1.82553	0.0679213	0.60316	0	3.03501	0.551984	-1.36741	-0.0440007	0.3365	-1.14014	-1.75575	-0.248244	-0.0112218	0.0802022	-0.366142	-0.401296	0.0329582	0.0650443	0.0568071	0.10313	0.05224
1339	COX6A2	0.2174	0.119119	1.82507	0.0679906	0.60316	34.5725	6.11363	0.190821	0.0414258	2.25418	1.41928	2.04234	-0.594121	0.00850923	0.502589	0.442901	0.324883	-0.132333	0.0421929	0.0497106	0.0973822	0.0253045	0.0496118
153129	SLC38A9	-0.188106	0.103091	-1.82467	0.0680516	0.60316	16.7582	4.80528	0.307867	0.396342	-0.54909	-0.476522	-0.931438	-2.7366	0.0834973	-0.154184	-0.0908815	-0.202756	-0.49325	0.0443818	0.078848	0.0363734	0.0473846	0.0324871
25778	DSTYK	-0.354259	0.194163	-1.82454	0.06807	0.60316	70.1854	13.4162	0.00941134	-0.133716	0.306234	-5.80206	-1.32851	-1.60678	-0.0390429	0.100033	-0.896836	-0.318654	-0.360295	0.0852542	0.106703	0.0238925	0.0575317	0.0502813
55609	ZNF280C	-0.241533	0.13226	-1.82619	0.0678214	0.60316	40.172	6.68583	0.153452	-1.28635	-0.198427	-3.17779	0.102314	-0.686634	-0.315332	-0.0645952	-0.640808	0.0174892	-0.168695	0.0600919	0.105974	0.0406636	0.0292194	0.060361
6659	SOX4	-0.205998	0.112724	-1.82745	0.0676329	0.60316	0	2.31596	0.677865	-0.0506614	-0.769597	-0.154689	-0.975207	-2.02131	-0.0115947	-0.213636	-0.0439022	-0.254749	-0.457034	0.0523798	0.0770586	0.0805477	0.0682387	0.0511245
7705	ZNF146	-0.181576	0.0994302	-1.82617	0.0678251	0.60316	7.6047	4.32922	0.36328	0.508088	0.12503	-2.4417	-0.967304	-1.00363	0.105857	0.0342773	-0.390728	-0.220747	-0.246923	0.0434075	0.0751593	0.0256074	0.052079	0.0605302
83690	CRISPLD1	0.150679	0.0825459	1.8254	0.067941	0.60316	0	3.51493	0.475613	1.09808	-0.164335	-0.737669	2.07383	0.877078	0.21538	-0.0334618	-0.266949	0.3237	0.126639	0.0384716	0.0414608	0.130959	0.0243634	0.0208477
222962	SLC29A4	0.199728	0.109353	1.82646	0.0677813	0.60316	22.016	5.12926	0.27429	0.0161099	1.80665	-0.0735809	2.65545	-0.0579165	0.00401498	0.442804	-0.0189549	0.408459	-0.0123193	0.0621128	0.0600727	0.0663611	0.0236603	0.0452448
84889	SLC7A3	-0.258011	0.141458	-1.82394	0.0681607	0.603187	49.9842	7.99747	0.0916708	-2.30652	-0.116615	-1.13368	0.346893	-2.54417	-0.515748	-0.0278293	-0.355055	0.0551443	-0.565823	0.0499989	0.0569501	0.0980863	0.0252703	0.0494616
6494	SIPA1	0.16508	0.09051	1.82389	0.0681693	0.603187	0	2.4918	0.646104	1.79895	0.41563	1.3038	-0.671476	0.508551	0.299922	0.0871589	0.255682	-0.226771	0.0951232	0.0277959	0.0439753	0.0384572	0.114055	0.0349868
6122	RPL3	-0.168415	0.092347	-1.82372	0.0681945	0.603187	0	3.28051	0.512027	-1.00111	-2.00036	-0.745054	-1.00462	0.196099	-0.209254	-0.481294	-0.113146	-0.367764	0.0382555	0.0436903	0.0578903	0.0230625	0.13401	0.0380573
4762	NEUROG1	0.174758	0.0958502	1.82324	0.0682666	0.603467	0	2.98258	0.560744	0.565132	1.00226	1.03223	1.93857	-0.399178	0.136774	0.246307	0.305802	0.332455	-0.0730984	0.0585742	0.060394	0.0877663	0.0294105	0.0335338
84524	ZC3H8	-0.271724	0.149058	-1.82295	0.0683117	0.603508	45.4865	7.33763	0.119086	-2.14824	-0.0834073	0.400203	-0.643892	-2.98406	-0.512617	-0.0235656	0.126096	-0.121643	-0.699037	0.0569404	0.0798266	0.0992761	0.0356903	0.0548765
84516	DCTN5	0.28513	0.156492	1.82201	0.0684535	0.603845	60.1446	10.0363	0.0398209	0.957449	3.98666	0.758794	-0.598272	1.38517	0.186099	0.849213	0.149908	-0.184497	0.300354	0.0377796	0.0453748	0.0390305	0.0951	0.0470179
113246	C12orf57	-0.31293	0.17172	-1.82233	0.068405	0.603845	63.5168	10.964	0.0269721	-3.12418	1.05277	-3.43759	-0.857882	-0.696393	-0.674691	0.273847	-0.607695	-0.274161	-0.153985	0.0466379	0.0676621	0.0312508	0.102131	0.0488932
388799	FAM209B	0.188629	0.103535	1.82189	0.0684714	0.603845	0	2.2714	0.685981	1.42489	1.06209	1.36243	0.721228	-0.236515	0.331134	0.332536	0.381994	0.123532	-0.0561173	0.0540059	0.0980289	0.0786115	0.0293368	0.0562957
776	CACNA1D	0.225882	0.124013	1.82143	0.0685408	0.604075	30.8956	5.78834	0.215523	-0.449026	0.983206	-0.254136	1.19485	3.11494	-0.126495	0.300442	-0.0807533	0.195488	0.538021	0.0793612	0.0933753	0.100969	0.026768	0.0298332
7122	CLDN5	-0.283471	0.155674	-1.82092	0.0686191	0.604075	28.0819	5.56188	0.234343	-0.192351	0.389991	-2.50536	-0.1246	-2.14844	-0.0638683	0.147677	-0.762885	-0.0368012	-0.459055	0.110251	0.143389	0.0927207	0.0872341	0.0456545
51074	APIP	-0.208328	0.114395	-1.82112	0.0685879	0.604075	25.5156	5.37025	0.251372	-0.558977	0.27336	-2.78893	-1.57891	0.255565	-0.126145	0.0831942	-0.475521	-0.353132	0.0555524	0.0509273	0.0926221	0.0290712	0.050022	0.0472502
5897	RAG2	0.167483	0.0920207	1.82006	0.06875	0.60487	0	3.24654	0.517447	1.27621	-0.0926462	0.0670947	2.2155	0.0944502	0.272375	-0.020139	0.0193552	0.363227	0.0186103	0.0455504	0.0472521	0.0832184	0.026879	0.0388241
7169	TPM2	0.212606	0.116841	1.81962	0.0688175	0.605107	0	3.76329	0.438988	0.0261066	1.23758	2.33217	0.293327	0.130212	0.00618017	0.321082	0.582005	0.105681	0.0317796	0.0560404	0.067311	0.0622777	0.129804	0.0595659
6609	SMPD1	0.169277	0.093053	1.81915	0.0688889	0.605377	0	3.97517	0.409376	1.51579	-0.446604	0.917879	0.153731	1.98022	0.354317	-0.105319	0.187908	0.0272607	0.408114	0.0546396	0.055612	0.0419103	0.0314449	0.0424753
197021	LCTL	-0.189531	0.10427	-1.8177	0.0691107	0.606969	0	3.46693	0.482925	0.935856	-0.979682	-0.658078	-1.50276	-1.49799	0.235265	-0.290603	-0.23922	-0.271858	-0.290095	0.0631969	0.0879893	0.132142	0.0327268	0.0375024
170572	HTR3C	0.165029	0.0908212	1.81708	0.0692054	0.607085	0	2.74063	0.602123	-0.308346	1.17015	1.37177	1.6373	0.124736	-0.0651303	0.265389	0.319251	0.2739	0.0248559	0.0446158	0.0514376	0.0541628	0.0279853	0.0397079
5863	RGL2	0.202364	0.111358	1.81724	0.0691808	0.607085	0	2.36303	0.669319	1.41191	1.58868	-0.172634	-0.209884	1.0364	0.327962	0.422262	-0.0624931	-0.059658	0.196059	0.0539551	0.070647	0.131042	0.0807937	0.0357862
221037	JMJD1C	-0.2259	0.124349	-1.81666	0.0692698	0.607292	0	0.541628	0.969324	-0.340193	-0.51553	-0.711189	-0.604498	-1.60909	-0.091299	-0.162852	-0.351373	-0.199963	-0.30667	0.0720247	0.0997874	0.244098	0.109424	0.0363232
5475	PPEF1	0.192207	0.105855	1.81576	0.069407	0.608138	0	3.8821	0.422198	0.174576	2.13077	1.12924	1.1494	-0.110052	0.048627	0.64273	0.406127	0.193107	-0.0233545	0.0775862	0.0909876	0.129347	0.0282262	0.045034
8547	FCN3	-0.157563	0.0867898	-1.81545	0.0694542	0.608194	0	3.63301	0.457945	0.0912429	-1.67685	-1.96673	-0.17106	-0.459824	0.0162934	-0.33691	-0.396792	-0.0368741	-0.0832087	0.0318877	0.0403685	0.0407037	0.0464672	0.0327458
25842	ASF1A	-0.224415	0.123642	-1.81505	0.0695168	0.608384	11.6388	4.52688	0.339373	0.0242012	0.385033	-1.9234	-0.64234	-2.0199	0.00570311	0.118112	-0.531543	-0.175991	-0.457813	0.0555329	0.0941008	0.0763725	0.0750672	0.0513711
22895	RPH3A	0.229126	0.126479	1.81157	0.0700522	0.608563	43.5304	7.08346	0.131543	0.101759	0.792848	-0.761366	2.83528	2.41064	0.0242139	0.230636	-0.17626	0.503609	0.392049	0.0566218	0.0846201	0.0535945	0.0315496	0.0264493
23261	CAMTA1	-0.217922	0.120153	-1.81371	0.0697228	0.608563	44.6031	7.22062	0.124679	-0.713217	-1.94844	-2.23125	0.705824	-1.42954	-0.144995	-0.449117	-0.595442	0.114621	-0.23756	0.0413297	0.0531304	0.0712167	0.0263717	0.0276157
5224	PGAM2	0.175193	0.0965497	1.81454	0.069595	0.608563	0	2.06529	0.723752	0.401519	1.47677	0.560458	0.319454	1.61233	0.0911123	0.348228	0.139449	0.0524095	0.396163	0.0514921	0.0556031	0.061908	0.0269157	0.0603729
27238	GPKOW	-0.245576	0.135426	-1.81337	0.0697755	0.608563	46.7032	7.50514	0.111483	1.05629	-0.760109	-2.86968	-0.514709	-2.64415	0.264859	-0.263297	-0.395454	-0.122348	-0.543543	0.0628729	0.119988	0.0189901	0.0565026	0.0422567
11344	TWF2	0.190173	0.104913	1.81267	0.0698834	0.608563	0	3.27131	0.513491	0.489361	1.30644	0.102468	-0.671587	2.03698	0.0962321	0.288041	0.0345845	-0.226338	0.39319	0.0386705	0.0486105	0.113917	0.113582	0.037259
57582	KCNT1	0.285781	0.157625	1.81304	0.0698253	0.608563	68.0807	12.5316	0.0138064	1.05585	3.57737	2.43529	-0.244031	0.0702879	0.202352	0.779657	0.591835	-0.0410272	0.0131436	0.0367288	0.0474984	0.0590608	0.0282653	0.0349675
9743	ARHGAP32	-0.205506	0.113447	-1.81148	0.0700673	0.608563	0	1.97909	0.739606	-1.83941	-0.206945	-0.530665	-1.24263	-0.0924907	-0.434101	-0.0673929	-0.141527	-0.300187	-0.0211519	0.0556964	0.106052	0.0711275	0.058358	0.0523003
28514	DLL1	-0.223026	0.123019	-1.81294	0.0698415	0.608563	14.1762	4.66071	0.323914	0.127226	0.212572	-1.38965	-0.316272	-2.65145	0.0334898	0.0733345	-0.501426	-0.0729826	-0.473471	0.0692905	0.119016	0.130198	0.0532497	0.0318873
57486	NLN	-0.184604	0.101894	-1.81173	0.0700282	0.608563	0	2.9499	0.566245	-1.05436	-0.501664	-0.899532	0.165406	-2.00808	-0.298248	-0.155065	-0.20388	0.029245	-0.429116	0.0800164	0.0955437	0.0513709	0.0312608	0.0456653
57337	SENP7	-0.330268	0.182061	-1.81405	0.0696703	0.608563	64.6908	11.3285	0.02311	1.23475	-1.13051	-3.33749	-1.08651	-2.63783	0.294079	-0.323856	-0.689273	-0.282006	-0.605662	0.0567249	0.0820645	0.0426523	0.0673673	0.052719
6194	RPS6	-0.191982	0.105981	-1.81147	0.0700681	0.608563	0	2.3708	0.667911	-1.85358	-1.16439	-0.0872708	-0.874691	-0.296595	-0.397267	-0.31308	-0.0221145	-0.366621	-0.0522978	0.0459351	0.0722953	0.0642121	0.175681	0.0310914
84665	MYPN	0.142991	0.078933	1.81155	0.0700562	0.608563	6.08513	4.25918	0.372065	-0.148869	0.674759	-0.377008	1.58556	2.16727	-0.031614	0.144153	-0.0593517	0.233378	0.336633	0.0450973	0.0456404	0.0247836	0.0216646	0.024126
59341	TRPV4	-0.300749	0.165991	-1.81184	0.0700106	0.608563	69.6031	13.1592	0.0105234	-1.70797	-0.168713	-2.21062	0.603943	-3.71815	-0.334033	-0.0334605	-0.692778	0.103407	-0.683081	0.0382491	0.0393338	0.0982111	0.0293161	0.0337513
1365	CLDN3	-0.177218	0.0978476	-1.81117	0.070115	0.608616	0	3.95791	0.411732	-1.48144	-1.05341	-0.263187	-1.80253	0.784544	-0.307441	-0.240488	-0.12086	-0.320045	0.155123	0.0430681	0.0521186	0.210879	0.031525	0.0390947
2317	FLNB	-0.201176	0.111105	-1.81069	0.0701894	0.608907	0	1.12476	0.890323	-1.74352	-0.686888	-0.305913	-0.608	-0.65454	-0.381484	-0.19556	-0.0656287	-0.219739	-0.152589	0.047874	0.0810564	0.0460246	0.130619	0.0543468
79042	TSEN34	-0.288292	0.159299	-1.80975	0.0703341	0.609808	62.6188	10.7006	0.0301437	0.0774183	-0.850724	-4.33312	-0.371927	-1.2621	0.0133538	-0.1923	-0.769178	-0.150465	-0.2544	0.0297526	0.0510955	0.0315103	0.163666	0.0406299
4245	MGAT1	0.182585	0.100933	1.80898	0.0704543	0.610494	0	2.02252	0.731617	1.65578	0.796606	0.250083	-0.586989	1.22949	0.324439	0.190495	0.0595214	-0.215843	0.226067	0.0383937	0.0571845	0.0566469	0.135212	0.0338084
7482	WNT2B	-0.301314	0.166617	-1.80843	0.0705401	0.610721	69.4276	13.0837	0.0108739	-0.597486	-1.31605	-1.4764	0.441895	-4.31291	-0.116491	-0.313136	-0.424458	0.0726858	-0.768175	0.0380126	0.0566133	0.0826532	0.0270559	0.0317234
8192	CLPP	-0.170167	0.0941042	-1.80828	0.0705623	0.610721	11.5634	4.52302	0.339827	-2.28141	0.195299	-1.24845	-1.19215	0.354204	-0.461878	0.0504843	-0.180656	-0.281544	0.0695425	0.0409871	0.0668208	0.0209395	0.055774	0.0385474
81929	SEH1L	-0.176821	0.0978278	-1.80747	0.0706894	0.611052	0	3.368	0.498231	-0.238868	-0.871827	-2.03032	0.173454	-1.29055	-0.0513406	-0.283975	-0.447103	0.0326193	-0.260619	0.0461964	0.106096	0.048494	0.0353658	0.0407813
8707	B3GALT2	0.22353	0.123659	1.80763	0.0706646	0.611052	28.7808	5.61646	0.229681	2.08095	-1.20735	0.937004	1.53859	1.33607	0.455223	-0.318779	0.292769	0.260831	0.329795	0.0478546	0.0697132	0.0976262	0.0287392	0.0609298
126206	NLRP5	0.179052	0.0990742	1.80725	0.0707237	0.611052	0	1.19081	0.87961	-0.202899	0.70896	0.223987	1.5362	1.226	-0.0503169	0.188137	0.0902258	0.259634	0.222926	0.0614988	0.0704212	0.162262	0.0285645	0.0330627
84958	SYTL1	0.186265	0.103088	1.80685	0.0707862	0.611238	0	3.36806	0.498222	0.766656	0.991321	-0.198576	-0.742029	2.11477	0.203088	0.213485	-0.0629871	-0.230938	0.34296	0.0701727	0.0463776	0.100612	0.0968607	0.0263003
6252	RTN1	-0.198305	0.109817	-1.80578	0.0709521	0.612152	0	2.35903	0.670044	-1.54167	0.509072	-1.08775	-0.672935	-1.16102	-0.324936	0.131816	-0.363757	-0.157567	-0.271301	0.0444238	0.067047	0.111832	0.0548256	0.0546041
55722	CEP72	-0.16883	0.0935011	-1.80564	0.0709741	0.612152	9.88418	4.43873	0.349874	-0.306763	-0.0796106	-0.910853	0.0791093	-2.71428	-0.0696734	-0.0210289	-0.239918	0.0126474	-0.412998	0.0515854	0.0697734	0.0693792	0.0255592	0.0231518
51227	PIGP	-0.171461	0.095015	-1.80456	0.0711429	0.612898	0	3.91277	0.41794	-1.53374	0.119521	-1.79819	-1.1418	0.515151	-0.325923	0.0296088	-0.350206	-0.237574	0.107732	0.045157	0.0613698	0.0379295	0.0432927	0.043734
57533	TBC1D14	-0.174068	0.0964586	-1.80458	0.0711399	0.612898	0	2.85727	0.581987	-1.34135	-0.157032	-1.9071	-0.788363	0.177054	-0.253239	-0.0339312	-0.375719	-0.297948	0.0352435	0.0356429	0.04669	0.038813	0.142832	0.0396231
123041	SLC24A4	0.182241	0.101027	1.80388	0.07125	0.613466	0	3.4696	0.482516	0.739504	0.468196	1.77482	-0.378761	1.6322	0.154109	0.113319	0.512108	-0.0809633	0.333287	0.0434282	0.0585796	0.0832557	0.0456925	0.0416958
84102	SLC41A2	0.172321	0.0955639	1.8032	0.0713565	0.614028	0	0.701194	0.951182	0.259153	0.920603	0.593487	0.854682	1.39834	0.0513246	0.215387	0.185064	0.155477	0.278377	0.0392227	0.0547389	0.0972346	0.033092	0.0396315
4128	MAOA	0.260912	0.145011	1.79925	0.0719789	0.614416	0	3.12621	0.536931	1.10623	0.902973	2.06646	-0.226964	-0.0512725	0.493827	0.408665	0.487863	-0.080064	-0.0150043	0.199276	0.204826	0.0557367	0.12444	0.085637
1607	DGKB	-0.148696	0.0826277	-1.79959	0.0719248	0.614416	5.07255	4.21374	0.377851	-1.08188	-0.400193	-1.32642	0.515372	-2.06077	-0.185334	-0.0747473	-0.335797	0.0814883	-0.340217	0.0293461	0.0348861	0.0640903	0.0250005	0.0272554
79696	ZC2HC1C	0.283084	0.157157	1.80128	0.0716591	0.614416	66.5124	11.9447	0.017767	4.64714	0.0244578	0.135572	1.44538	0.89916	0.809562	0.00468251	0.0537814	0.234911	0.17002	0.030348	0.036654	0.157372	0.0264144	0.0357541
6943	TCF21	-0.216421	0.120168	-1.80099	0.0717047	0.614416	54.5078	8.79271	0.0664947	-1.02954	-1.67288	-1.56234	0.904273	-2.67594	-0.159185	-0.262571	-0.48721	0.134863	-0.521657	0.0239066	0.0246357	0.0972481	0.0222427	0.038003
8754	ADAM9	0.229783	0.127729	1.79899	0.0720199	0.614416	29.9376	5.7092	0.221944	2.02715	-0.28501	2.30127	-0.366274	1.01507	0.492982	-0.0902412	0.461738	-0.076129	0.26201	0.0591409	0.100251	0.0402585	0.0432004	0.0666265
23193	GANAB	-0.206345	0.114669	-1.79948	0.0719423	0.614416	44.2575	7.17586	0.126882	-0.144473	0.403285	-3.79736	-0.585117	-1.37727	-0.0288042	0.0925904	-0.481714	-0.125375	-0.296213	0.0397501	0.0527118	0.0160922	0.0459131	0.0462558
2837	UTS2R	0.180983	0.100462	1.8015	0.0716235	0.614416	0	1.76598	0.7787	1.77426	1.02052	0.484374	0.737486	-0.208358	0.369102	0.241773	0.14396	0.128285	-0.0561111	0.043277	0.0561268	0.0883321	0.0302584	0.0725228
8973	CHRNA6	0.185344	0.102938	1.80053	0.0717767	0.614416	0	2.49113	0.646224	0.592729	0.975014	0.199335	0.303215	2.0735	0.148709	0.263397	0.0692023	0.049683	0.472724	0.0629449	0.072979	0.120524	0.0268481	0.0519767
1812	DRD1	0.165585	0.0919994	1.79985	0.0718839	0.614416	0	3.92545	0.41619	1.28513	1.99854	1.10717	0.419705	-0.342383	0.248208	0.493519	0.296843	0.0716753	-0.0662085	0.0373025	0.0609793	0.0718829	0.0291643	0.037394
9645	MICAL2	-0.246711	0.136926	-1.80179	0.0715785	0.614416	0	3.72693	0.444222	0.39838	0.088753	-1.05369	-0.777217	-2.25665	0.130442	0.0374053	-0.268114	-0.238116	-0.64394	0.107211	0.177623	0.0647456	0.0938627	0.0814261
118429	ANTXR2	0.262346	0.14565	1.80121	0.07167	0.614416	50.1095	8.01755	0.0909373	1.02268	-0.13627	3.41262	-0.50964	1.8207	0.191816	-0.0308969	0.687648	-0.195066	0.397007	0.0351798	0.0514074	0.0406027	0.146499	0.0475465
168537	GIMAP7	-0.248488	0.137959	-1.80117	0.0716754	0.614416	0	0.567022	0.966657	-0.882189	-0.36485	-0.984835	-1.26668	-0.570525	-0.292304	-0.154364	-0.268812	-0.442754	-0.141578	0.109785	0.179004	0.0745027	0.122178	0.0615803
55299	BRIX1	-0.177419	0.0984683	-1.80179	0.0715781	0.614416	0	3.20382	0.524315	0.303963	-0.605202	-2.4133	-0.35261	-0.207988	0.0737539	-0.197558	-0.37924	-0.0890707	-0.0458258	0.0588748	0.106558	0.0246949	0.0638088	0.0485448
83998	REG4	-0.241632	0.134232	-1.80011	0.0718436	0.614416	41.7795	6.87043	0.142896	-1.69448	0.926721	-2.53828	-0.700344	-1.31806	-0.45011	0.287433	-0.721805	-0.120189	-0.227579	0.0705604	0.0961998	0.080865	0.0294517	0.0298121
10585	POMT1	-0.171396	0.0952208	-1.79999	0.0718623	0.614416	17.5318	4.85036	0.302999	-1.47828	0.109923	-2.4972	0.295634	-0.68388	-0.301036	0.024376	-0.423964	0.0570637	-0.127986	0.0414687	0.0491756	0.0288237	0.0372573	0.0350239
54958	TMEM160	-0.202325	0.112514	-1.79822	0.0721421	0.615107	14.1869	4.66129	0.323849	-1.60525	1.20227	-1.9291	-0.350362	-1.0418	-0.337479	0.362969	-0.335525	-0.102384	-0.256743	0.0441986	0.0911459	0.0302511	0.0853954	0.0607333
2901	GRIK5	-0.154169	0.0858336	-1.79613	0.0724733	0.616987	0	1.54611	0.818443	-0.425945	-1.03078	-1.08397	0.0946472	-1.53112	-0.0915406	-0.240611	-0.20508	0.0170778	-0.251455	0.046187	0.0544875	0.0357941	0.0325574	0.0269714
55005	RMND1	-0.18053	0.100515	-1.79605	0.0724869	0.616987	0	2.735	0.603105	0.0155913	-1.16839	-1.25962	0.00152282	-1.73458	0.0039151	-0.323502	-0.271963	0.00028799	-0.381598	0.0630553	0.076662	0.0466163	0.0357651	0.0483976
196374	KRT78	0.17424	0.0970025	1.79624	0.0724561	0.616987	0	0.783911	0.940592	1.51746	0.186609	0.550885	0.767281	0.883559	0.287303	0.0400805	0.227506	0.147498	0.181196	0.0358462	0.0461317	0.170555	0.0369542	0.0420557
2098	ESD	-0.208232	0.116031	-1.79462	0.0727139	0.617157	0	0.860224	0.930197	-0.1061	-0.870907	-0.947585	-1.09023	-1.10663	-0.0253181	-0.281294	-0.239801	-0.34453	-0.238656	0.0569422	0.104322	0.0640421	0.0998655	0.0465093
3609	ILF3	-0.158812	0.0884748	-1.79499	0.0726547	0.617157	0	0.193155	0.995626	-0.959519	-0.262812	-1.18903	-0.795879	-0.614979	-0.187198	-0.0882494	-0.173825	-0.211669	-0.109262	0.0380624	0.112755	0.0213718	0.0707327	0.0315657
170384	FUT11	0.179602	0.100039	1.79532	0.0726035	0.617157	0	2.69922	0.609351	0.577046	-0.113331	1.95939	1.31528	0.0859709	0.138361	-0.0295625	0.454067	0.24241	0.0193352	0.0574917	0.0680428	0.0537031	0.0339674	0.0505819
57414	RHBDD2	0.18772	0.104558	1.79537	0.0725941	0.617157	0	1.86469	0.760629	0.642497	1.01234	0.500515	-0.371487	1.80608	0.157326	0.288991	0.0946692	-0.134729	0.347784	0.0599598	0.0814925	0.0357753	0.131534	0.0370806
9324	HMGN3	-0.184785	0.102963	-1.79468	0.0727054	0.617157	21.046	5.06624	0.280568	-0.736309	-0.479229	-2.71593	0.5167	-1.04842	-0.177643	-0.135456	-0.415005	0.0852276	-0.256836	0.0582069	0.0798938	0.0233491	0.0272072	0.0600118
51076	CUTC	-0.169287	0.0943588	-1.79408	0.0728011	0.617546	0	2.36707	0.668587	0.279889	-0.608084	-0.914806	-0.89971	-1.86851	0.0545814	-0.121134	-0.216897	-0.263525	-0.333589	0.0380291	0.0396832	0.0562148	0.0857905	0.0318737
3696	ITGB8	0.164347	0.0916503	1.7932	0.0729412	0.618031	0	2.45945	0.651911	0.909568	0.0534646	0.00648839	0.299177	2.18066	0.196351	0.014092	0.00223897	0.0487729	0.357665	0.0466011	0.0694726	0.119076	0.0265766	0.0269014
5709	PSMD3	0.169344	0.0944356	1.79323	0.0729369	0.618031	0	3.47768	0.48128	0.176617	0.483049	0.133335	0.544355	2.47279	0.0512064	0.130907	0.0235862	0.104861	0.469725	0.0840589	0.0734424	0.0312918	0.0371075	0.0360837
7486	WRN	-0.242055	0.135018	-1.79276	0.0730112	0.618073	44.9475	7.26579	0.122492	1.02958	-0.582374	-2.89122	-1.34257	-1.59515	0.246665	-0.144948	-0.555312	-0.299538	-0.355731	0.0573983	0.0619473	0.0368903	0.0497769	0.0497326
23171	GPD1L	-0.176317	0.0983556	-1.79265	0.0730291	0.618073	8.04667	4.35003	0.360702	-1.17895	-1.83149	1.00336	-1.20069	-0.858864	-0.2191	-0.328534	0.22284	-0.3449	-0.18755	0.0345377	0.0321776	0.0493255	0.0825131	0.0476853
266747	RGL4	0.244826	0.136658	1.79152	0.0732092	0.619208	0	1.59007	0.810575	1.01998	0.53248	1.26355	-0.273107	1.34335	0.249368	0.176811	0.687509	-0.108283	0.316564	0.0597714	0.110258	0.296055	0.157201	0.0555325
8317	CDC7	0.29895	0.166891	1.79129	0.0732464	0.619208	55.2589	8.94033	0.0626083	1.07954	-0.511287	3.8517	0.732833	0.848515	0.334983	-0.188166	0.850864	0.141379	0.183193	0.0962868	0.135442	0.0487994	0.0372183	0.0466123
29966	STRN3	-0.191985	0.107215	-1.79065	0.0733491	0.619725	0	0.0673635	0.999445	-0.825371	-0.746727	-1.01223	-0.490686	-0.87726	-0.217563	-0.218155	-0.203252	-0.133831	-0.184369	0.0694818	0.0853509	0.0403194	0.0743891	0.0441691
10044	SH2D3C	0.19052	0.106416	1.79033	0.0734003	0.619807	0	3.45218	0.485186	1.28178	0.347769	0.767994	-0.845861	1.89428	0.247268	0.0921938	0.200642	-0.252933	0.409774	0.0372144	0.0702781	0.068254	0.0894156	0.0467952
1641	DCX	0.226254	0.126593	1.78725	0.0738975	0.620237	51.6517	8.2733	0.0820645	-0.891765	1.52584	2.98869	1.83593	0.352592	-0.185456	0.364586	0.584546	0.277009	0.0726521	0.0432496	0.0570932	0.0382539	0.0227655	0.0424572
7074	TIAM1	-0.202381	0.11318	-1.78813	0.0737543	0.620237	0	0.401635	0.982343	-0.319805	-0.554391	-1.18546	-0.944446	-0.944527	-0.10804	-0.208844	-0.362345	-0.165199	-0.217441	0.114129	0.14191	0.0934259	0.0305957	0.0529971
1191	CLU	-0.148322	0.0830086	-1.78682	0.0739659	0.620237	0	2.16194	0.706003	-0.922317	-1.77761	-1.07019	0.0263949	-0.445097	-0.139717	-0.320478	-0.277818	0.00404481	-0.121761	0.0229476	0.0325031	0.0673904	0.0234832	0.0748357
3754	KCNF1	0.174464	0.0976601	1.78645	0.0740272	0.620237	8.38578	4.36613	0.358717	1.71907	1.99721	0.827509	-0.200836	0.237218	0.35196	0.471792	0.248493	-0.03463	0.0437907	0.0419179	0.0558025	0.0901743	0.0297318	0.0340776
10600	USP16	-0.220168	0.123094	-1.78862	0.0736761	0.620237	44.6151	7.22219	0.124602	0.642689	-0.422335	-2.28163	-0.786844	-2.62711	0.120065	-0.0923887	-0.347543	-0.202324	-0.617998	0.0349002	0.0478546	0.0232021	0.0661178	0.0553371
79135	APOO	-0.192958	0.107882	-1.7886	0.0736797	0.620237	8.10823	4.35295	0.360342	0.811103	-1.85784	-0.685158	-1.2177	-1.32695	0.203731	-0.512229	-0.130788	-0.260205	-0.333524	0.0630903	0.0760169	0.0364381	0.0456614	0.0631749
221692	PHACTR1	0.210225	0.117714	1.78589	0.0741172	0.620237	1.25656	4.0509	0.399161	0.357614	-0.387883	0.75375	0.0778714	2.54249	0.0969668	-0.15155	0.23685	0.0177672	0.521064	0.0735218	0.152655	0.0987395	0.0520572	0.0420014
8723	SNX4	-0.287561	0.160833	-1.78795	0.0737844	0.620237	58.0086	9.52577	0.0492205	0.74262	-0.638137	-3.76769	-1.97026	-0.809246	0.15337	-0.159509	-0.606336	-0.542976	-0.256252	0.0426527	0.0624804	0.0258986	0.0759477	0.100271
2829	XCR1	0.186032	0.104152	1.78616	0.0740736	0.620237	28.7535	5.61431	0.229863	0.816028	2.58718	0.510807	1.51299	-0.844601	0.149188	0.496373	0.135195	0.232657	-0.187206	0.033424	0.0368097	0.0700496	0.0236462	0.0491289
225689	MAPK15	0.174163	0.0973409	1.78921	0.0735815	0.620237	0	3.04476	0.550363	-0.236635	0.860114	1.87383	0.259863	1.36801	-0.0624114	0.244416	0.552706	0.0485927	0.219945	0.0695615	0.0807512	0.0870013	0.0349664	0.0258493
[truncated: 13,154 more rows]
