# Supplementary material for: Perinatal granulopoiesis and risk of pediatric asthma
Source: eLife. 2021 Feb 10;10:e63745. doi: 10.7554/eLife.63745 (PMC7889076; doi:10.7554/eLife.63745)
Supplement: Supplementary file 4. [file elife-63745-supp4.xlsx]

## Sheet: res_mbmi
Table S4. Meta-Analysis of CBMC Gene Expression Associated with Maternal Pre-pregnancy BMI
Higher (red) and lower (blue) maternal pre-pregnancy BMI associated genes colored, 1% FDR
entrezgene	HGNC Symbol	Effect Size	SE	z-Score	p-value	p-adj (FDR)	I2	Q-value	Q, p-values	zSco_GSE27272	zSco_GSE30032	zSco_GSE60403	zSco_GSE21342	Effect_GSE27272	Effect_GSE30032	Effect_GSE60403	Effect_GSE21342	EffectVar_GSE27272	EffectVar_GSE30032	EffectVar_GSE60403	EffectVar_GSE21342
2516	NR5A1	-0.685425	0.130707	-5.24399	1.57145e-07	0.00125841	0	1.7596	0.623765	-3.63622	-1.70852	-2.15661	-2.9098	-0.882501	-0.439885	-0.845822	-0.651149	0.0589021	0.0662883	0.153821	0.0500768
554235	ASPDH	0.728676	0.136923	5.32177	1.02761e-07	0.00125841	0	2.48708	0.47763	2.96082	1.31262	1.34769	4.30147	0.796139	0.367877	0.641019	0.909731	0.0723024	0.0785469	0.226236	0.0447293
845	CASQ2	-0.686529	0.14449	-4.75138	2.02028e-06	0.00756176	0	1.73947	0.628196	-2.06283	-1.96395	-1.47662	-3.74464	-0.605292	-0.486153	-0.742688	-0.935827	0.0860999	0.0612751	0.252973	0.0624555
11019	LIAS	-0.592703	0.12914	-4.58962	4.44064e-06	0.00756176	0	1.00104	0.801	-3.26014	-1.16259	-1.73175	-2.66205	-0.760884	-0.381393	-0.517646	-0.579256	0.0544708	0.107619	0.0893502	0.0473489
81035	COLEC12	-0.652938	0.142719	-4.57499	4.76248e-06	0.00756176	0	0.388791	0.942548	-1.83652	-2.54124	-0.879334	-3.27343	-0.569526	-0.659849	-0.439156	-0.734629	0.0961689	0.0674212	0.24942	0.0503651
10718	NRG3	0.682722	0.150429	4.5385	5.66565e-06	0.00756176	0	0.907819	0.82354	2.43991	1.61848	2.18372	2.85736	0.643026	0.509956	1.03281	0.731685	0.0694561	0.0992775	0.223691	0.0655721
8908	GYG2	0.472025	0.103873	4.54425	5.51322e-06	0.00756176	0	2.35762	0.501572	3.41281	1.73218	0.267547	2.87898	0.650201	0.312414	0.121125	0.529965	0.036297	0.0325294	0.204959	0.0338858
1281	COL3A1	0.655809	0.144145	4.54965	5.37363e-06	0.00756176	0	3.30311	0.34721	2.93132	2.84602	2.6855	1.41601	0.862584	0.722129	0.961283	0.327506	0.0865917	0.0643804	0.128131	0.0534942
1981	EIF4G1	0.455381	0.0999284	4.55708	5.187e-06	0.00756176	0	0.890308	0.827766	2.41258	2.09065	0.92805	3.25648	0.459901	0.409323	0.261744	0.558765	0.0363385	0.0383329	0.0795447	0.0294416
5913	RAPSN	0.68255	0.144764	4.71491	2.41819e-06	0.00756176	0	0.514894	0.915607	2.06678	2.54425	1.0583	3.29856	0.552802	0.731071	0.541428	0.781676	0.0715405	0.0825658	0.261737	0.0561571
245973	ATP6V1C2	0.539217	0.11202	4.81356	1.48264e-06	0.00756176	0	1.53772	0.673593	2.77507	1.79576	0.972179	3.5829	0.526109	0.37321	0.45775	0.728254	0.0359421	0.0431926	0.221699	0.0413138
442213	PTCHD4	-0.677878	0.154011	-4.40148	1.07516e-05	0.0132459	1.68729	4.06865	0.254146	-3.3957	-1.02364	-1.64619	-4.2159	-0.828906	-0.254174	-0.859287	-0.839057	0.059587	0.0616551	0.272469	0.0396099
9025	RNF8	0.606767	0.141016	4.30283	1.68631e-05	0.0180053	0	3.2493	0.354762	2.25429	0.799594	1.23349	4.10399	0.596512	0.237456	0.453767	0.868655	0.0700194	0.0881914	0.135331	0.0448005
387694	SH2D4B	-0.577562	0.133893	-4.31362	1.60601e-05	0.0180053	0	2.46991	0.480753	-1.34082	-3.42632	-0.180756	-2.73991	-0.405603	-0.876985	-0.101038	-0.53337	0.0915081	0.0655133	0.312454	0.0378952
1310	COL19A1	-0.554607	0.129458	-4.28406	1.83517e-05	0.0183701	0	0.873055	0.831925	-1.80891	-1.39284	-1.50611	-3.4272	-0.491341	-0.376148	-0.75657	-0.642657	0.0737792	0.0729319	0.252339	0.0351625
6509	SLC1A4	0.661303	0.156279	4.23157	2.32066e-05	0.0218634	0	1.9042	0.592527	0.580758	1.60103	2.79607	3.01526	0.219083	0.632554	0.869882	0.727468	0.142307	0.156097	0.0967889	0.0582075
58499	ZNF462	0.654689	0.157141	4.16625	3.09646e-05	0.0275516	0	2.37958	0.497448	1.20317	0.765787	1.8037	3.8013	0.442358	0.281894	0.656727	0.891628	0.135175	0.135505	0.132568	0.0550179
114794	ELFN2	0.546748	0.13268	4.12081	3.77535e-05	0.028655	0	2.59806	0.45783	1.33478	2.61091	0.313305	3.29887	0.367142	0.758748	0.117855	0.664037	0.0756571	0.0844525	0.141501	0.0405186
26150	RIBC2	0.570633	0.139253	4.09781	4.17079e-05	0.028655	0	0.109903	0.990623	2.05972	2.50382	0.870601	2.37328	0.521901	0.629042	0.493453	0.57497	0.0642035	0.0631181	0.321257	0.058694
349075	ZNF713	-0.586509	0.143996	-4.0731	4.6392e-05	0.028655	0	2.60053	0.457397	-2.56721	-1.09087	0.0724919	-3.37711	-0.76421	-0.368772	0.0358708	-0.687793	0.0886143	0.11428	0.244852	0.0414788
83546	RTBDN	-0.458149	0.112207	-4.08307	4.4445e-05	0.028655	0	3.4517	0.327081	-2.60599	-0.896841	-1.85776	-3.51728	-0.495623	-0.174218	-0.82684	-0.586201	0.0361708	0.037736	0.198089	0.0277766
283284	IGSF22	0.563109	0.136018	4.13995	3.47382e-05	0.028655	0	1.69791	0.637397	1.70006	3.53663	1.05012	1.52854	0.40143	0.789092	0.546956	0.435086	0.0557559	0.0497826	0.271287	0.081021
57657	HCN3	0.625224	0.153525	4.07247	4.65178e-05	0.028655	0	0.469242	0.925595	2.16468	1.25597	0.962901	3.14066	0.714813	0.436133	0.517062	0.677408	0.109043	0.12058	0.288352	0.0465221
219855	SLC37A2	0.528011	0.129088	4.09033	4.30751e-05	0.028655	0	1.52031	0.677592	2.22086	2.03599	0.367751	3.0064	0.51936	0.423767	0.198662	0.770732	0.0546882	0.0433212	0.291825	0.0657225
219927	MRPL21	0.544005	0.133204	4.08401	4.42659e-05	0.028655	0	1.77292	0.620845	1.87671	1.24188	1.18805	3.46067	0.463113	0.343993	0.44681	0.777059	0.0608949	0.0767257	0.14144	0.0504181
9350	CER1	0.520243	0.128518	4.048	5.16564e-05	0.0300604	0	0.585579	0.899726	1.99132	1.54197	0.411604	3.23411	0.513787	0.443556	0.212661	0.593531	0.0665705	0.0827459	0.266942	0.0336804
57405	SPC25	0.545621	0.134922	4.04397	5.25531e-05	0.0300604	0	0.0850979	0.993564	2.4018	2.17031	0.841373	2.29173	0.606758	0.530182	0.498749	0.516842	0.0638203	0.0596768	0.351388	0.0508615
6833	ABCC8	-0.498088	0.123467	-4.03418	5.47939e-05	0.0302613	0	1.74573	0.626816	-1.19483	-2.02659	-1.04762	-3.37463	-0.284343	-0.482817	-0.411978	-0.690905	0.0566338	0.0567592	0.154646	0.0419164
4015	LOX	-0.51758	0.130762	-3.95816	7.55278e-05	0.0336015	0	3.52626	0.317373	-1.15378	-1.52521	-2.68371	-3.34299	-0.271489	-0.348572	-0.841813	-0.709442	0.0553674	0.0522306	0.0983924	0.0450365
3217	HOXB7	-0.585582	0.147314	-3.97505	7.03651e-05	0.0336015	2.28784	4.09366	0.251527	-1.33763	-2.72134	-3.29291	-2.33351	-0.342499	-0.587411	-1.24494	-0.498872	0.065561	0.0465926	0.142935	0.0457044
55966	AJAP1	-0.444987	0.111817	-3.97959	6.90349e-05	0.0336015	0	3.18258	0.364323	-2.681	-1.43648	-2.98834	-1.30756	-0.597639	-0.315704	-0.725712	-0.250448	0.0496915	0.0483015	0.0589751	0.0366869
9132	KCNQ4	0.468641	0.11809	3.9685	7.23277e-05	0.0336015	0	3.47721	0.32373	1.77434	3.74065	0.661181	2.19695	0.423462	0.801777	0.249981	0.339819	0.0569582	0.0459424	0.142947	0.0239251
653308	ASAH2B	-0.538374	0.135831	-3.96356	7.38388e-05	0.0336015	0	2.00013	0.57238	-1.58541	-0.37964	-1.278	-3.6632	-0.533754	-0.138422	-0.412146	-0.689325	0.113344	0.132943	0.104002	0.0354101
79258	MMEL1	-0.592251	0.14884	-3.9791	6.91752e-05	0.0336015	0.31028	4.01245	0.260123	-1.65209	-2.02229	-0.476798	-4.63036	-0.411851	-0.49399	-0.206594	-0.906284	0.0621456	0.0596691	0.187743	0.0383088
10332	CLEC4M	-0.523692	0.131746	-3.975	7.03799e-05	0.0336015	0	0.6613	0.882267	-1.59394	-2.10865	-1.30579	-2.78744	-0.440286	-0.442635	-0.592694	-0.676869	0.0763003	0.0440641	0.206023	0.0589656
2850	GPR27	0.640253	0.162632	3.93682	8.25694e-05	0.0357414	0	2.88066	0.410394	1.88206	0.713177	2.36314	2.95702	0.567809	0.232543	0.96146	0.876756	0.09102	0.106319	0.165532	0.0879122
89822	KCNK17	-0.672739	0.171524	-3.92212	8.7772e-05	0.0369936	0	0.499616	0.918976	-2.29558	-1.62404	-0.557198	-2.76858	-0.829769	-0.615301	-0.342799	-0.676925	0.130656	0.143542	0.378495	0.0597817
51616	TAF9B	0.492908	0.125992	3.91221	9.14564e-05	0.0375581	0	3.14073	0.370433	1.90596	1.22344	3.18733	1.95302	0.477041	0.288142	0.94022	0.430028	0.0626444	0.0554687	0.0870173	0.0484819
10053	AP1M2	0.598807	0.153448	3.90234	9.52688e-05	0.0381456	0	0.942254	0.815221	1.41804	2.22272	2.06552	2.22549	0.438869	0.730195	0.884286	0.534947	0.0957841	0.107922	0.183285	0.0577792
79158	GNPTAB	0.56649	0.145534	3.89249	9.92214e-05	0.0387593	0	3.27757	0.350776	2.71794	0.158601	2.24166	2.80926	0.833542	0.0539839	0.729873	0.570695	0.0940538	0.115856	0.106012	0.0412691
1303	COL12A1	-0.509414	0.131702	-3.86793	0.000109762	0.0387967	0	1.19036	0.755318	-2.12951	-2.13333	-0.643625	-2.57898	-0.52193	-0.581574	-0.20431	-0.614294	0.060071	0.0743181	0.100766	0.0567358
5375	PMP2	-0.521109	0.134314	-3.87978	0.000104552	0.0387967	0	0.682142	0.877396	-2.13814	-1.29657	-1.96815	-2.36822	-0.528878	-0.37631	-0.782421	-0.518165	0.0611841	0.0842365	0.158039	0.0478731
169166	SNX31	0.748258	0.193368	3.86962	0.000109007	0.0387967	14.6535	4.68678	0.196223	0.659692	3.5869	1.74673	3.77481	0.204759	1.11258	0.782652	0.859848	0.0963391	0.0962107	0.200763	0.0518863
50839	TAS2R10	-0.574429	0.148652	-3.86425	0.000111429	0.0387967	0	1.40114	0.705267	-1.90686	-0.723455	-0.551545	-3.44527	-0.599602	-0.254859	-0.322656	-0.700923	0.0988751	0.124101	0.342228	0.0413899
2359	FPR3	-0.726111	0.187255	-3.87765	0.00010547	0.0387967	9.48064	4.41894	0.219635	-2.35408	-0.78996	-2.41507	-3.96103	-0.673734	-0.23932	-1.05985	-1.00779	0.0819097	0.0917802	0.192589	0.0647323
160140	C11orf65	0.561874	0.14602	3.84791	0.000119129	0.0405951	0	0.144462	0.986014	1.55295	1.56159	1.40097	2.85271	0.506093	0.531977	0.732467	0.568171	0.106205	0.116051	0.273351	0.0396682
65986	ZBTB10	-0.614707	0.161468	-3.807	0.000140662	0.0469342	0	3.77413	0.28691	-1.5324	-2.42393	-0.346909	-3.99484	-0.512784	-0.802337	-0.113287	-0.823018	0.111976	0.109565	0.106642	0.0424444
130733	TMEM178A	-0.465529	0.123204	-3.77851	0.00015777	0.0505369	0	0.621274	0.891545	-2.06686	-1.26987	-0.636102	-2.93416	-0.523109	-0.311262	-0.355272	-0.53201	0.0640564	0.0600802	0.311938	0.0328755
7576	ZNF28	0.579652	0.154609	3.74915	0.000177436	0.0557218	0	3.69764	0.296019	0.893577	2.74123	2.86338	2.12023	0.278287	0.844986	0.990239	0.422317	0.0969892	0.0950186	0.119597	0.0396746
1725	DHPS	0.45959	0.122789	3.74293	0.000181885	0.0560205	0	2.83984	0.416984	0.701889	3.33998	1.10855	1.99308	0.164589	0.689226	0.415147	0.476084	0.0549878	0.0425829	0.140246	0.057058
3547	IGSF1	-0.420849	0.112617	-3.73699	0.000186238	0.0562789	0	2.80809	0.422171	-1.03912	-2.0423	-2.51431	-2.28049	-0.224495	-0.447751	-0.951693	-0.418893	0.0466746	0.0480654	0.14327	0.0337404
127700	OSCP1	-0.466181	0.125072	-3.72731	0.000193536	0.0574013	0	3.16101	0.36746	-3.25976	-1.7968	0.560072	-2.00511	-0.707964	-0.417382	0.346029	-0.390824	0.0471685	0.0539594	0.381713	0.0379913
631	BFSP1	0.628721	0.169196	3.71593	0.00020246	0.0579036	0	3.82357	0.281157	3.4131	3.14539	-0.299278	1.3843	0.85014	0.802945	-0.179029	0.385787	0.0620417	0.0651661	0.357849	0.0776672
149986	LSM14B	0.530927	0.142849	3.7167	0.000201844	0.0579036	0	1.10083	0.776874	1.2179	1.19614	1.62168	3.06118	0.368349	0.381441	0.523312	0.70909	0.0914738	0.101693	0.104134	0.053657
55701	ARHGEF40	0.541197	0.146164	3.70267	0.000213341	0.059945	0	1.25951	0.738769	1.2777	1.41161	3.01549	1.50032	0.432055	0.487594	0.773287	0.394348	0.114346	0.119313	0.0657605	0.0690865
8448	DOC2A	0.474562	0.12914	3.67477	0.00023806	0.0657375	0	1.53514	0.674183	1.85442	1.169	0.476027	3.16339	0.483774	0.283158	0.237922	0.642771	0.0680559	0.0586717	0.249809	0.0412863
6342	SCP2	0.550207	0.150458	3.65688	0.000255306	0.0693046	0	3.13489	0.371292	1.53787	0.139697	2.09029	3.25709	0.471085	0.0485554	0.692353	0.75874	0.0938341	0.120809	0.109709	0.0542658
51678	MPP6	-0.556614	0.152769	-3.64351	0.000268946	0.0706136	0	0.755694	0.860032	-1.22848	-2.23638	-1.20444	-2.46366	-0.374463	-0.77188	-0.605691	-0.554553	0.0929142	0.119126	0.25289	0.050667
6734	SRPRA	0.489674	0.134383	3.64388	0.000268563	0.0706136	0	1.67504	0.642496	1.14505	3.04578	1.18997	1.71725	0.286947	0.717588	0.393401	0.489923	0.0627995	0.0555078	0.109294	0.0813934
22948	CCT5	0.583522	0.161304	3.61752	0.000297434	0.0741472	0	2.00182	0.572029	0.813792	0.978408	2.85502	2.306	0.290412	0.371841	0.895844	0.627596	0.127351	0.144435	0.0984573	0.0740697
2556	GABRA3	0.612647	0.169029	3.62452	0.000289504	0.0741472	4.01014	4.16711	0.243976	3.35558	3.15007	-0.323653	1.84258	0.842346	0.803115	-0.160885	0.460576	0.0630153	0.0650003	0.247099	0.0624809
972	CD74	0.538942	0.148776	3.62251	0.000291763	0.0741472	0	2.51384	0.472794	0.878656	2.70046	0.799706	2.63293	0.243629	0.702565	0.320977	0.78709	0.0768813	0.0676858	0.161097	0.0893652
163227	ZNF100	0.489797	0.135509	3.61451	0.000300922	0.0741472	0	2.45574	0.483344	1.02296	2.88244	0.0634267	2.48223	0.258184	0.741382	0.0372533	0.544981	0.0637005	0.0661554	0.344973	0.0482035
7580	ZNF32	0.860263	0.238542	3.60635	0.00031054	0.0751918	65.5253	11.6027	0.00887576	3.24332	3.6952	0.529384	7.52969	0.73181	0.810757	0.205824	1.44341	0.0509118	0.04814	0.151166	0.0367472
11333	PDAP1	0.525799	0.146059	3.5999	0.000318339	0.0751918	0	2.88212	0.41016	0.346209	1.49011	3.21875	1.77223	0.118567	0.553545	0.824393	0.445035	0.117287	0.137997	0.0655987	0.0630593
3444	IFNA7	-0.502503	0.139617	-3.59916	0.000319246	0.0751918	0	2.15867	0.540134	-2.88578	-2.11649	-0.203609	-1.50464	-0.74365	-0.603221	-0.10523	-0.33488	0.0664066	0.0812309	0.267104	0.0495349
4312	MMP1	-0.636001	0.177953	-3.57398	0.000351602	0.0804465	0	3.70429	0.295217	-2.74415	-0.499007	-0.433217	-3.71844	-0.798618	-0.160455	-0.296888	-0.866244	0.084696	0.103393	0.46965	0.0542699
114781	BTBD9	0.542055	0.151606	3.57543	0.000349659	0.0804465	0	0.593729	0.897866	1.79742	1.41647	1.1807	2.59735	0.542542	0.445724	0.403366	0.697543	0.09111	0.0990181	0.116713	0.0721243
6654	SOS1	0.549782	0.154097	3.56777	0.000360036	0.0812159	0	2.25634	0.520936	1.54232	0.193177	3.03142	1.83841	0.5708	0.0932614	0.847205	0.436751	0.136968	0.233073	0.0781063	0.0564395
1630	DCC	-0.478091	0.13488	-3.54456	0.000393267	0.0832177	0	2.3895	0.495592	-1.59978	-1.2218	-2.97981	-1.42199	-0.412672	-0.340965	-0.881905	-0.359084	0.0665409	0.0778793	0.0875925	0.0637675
7727	ZNF174	-0.460863	0.129721	-3.55272	0.000381267	0.0832177	0	3.41516	0.331934	-1.59293	-2.22427	-0.246435	-3.26165	-0.357637	-0.588736	-0.0716058	-0.690551	0.0504073	0.070059	0.0844289	0.0448248
23466	CBX6	-0.61307	0.172601	-3.55195	0.000382388	0.0832177	5.06927	4.2136	0.239304	-1.51716	-1.58141	-4.03529	-1.20473	-0.465398	-0.450663	-1.08126	-0.372195	0.0940987	0.0812109	0.071798	0.0954463
23429		-0.509491	0.143783	-3.54348	0.000394889	0.0832177	0	1.95552	0.581689	-0.765882	-2.35509	-2.53784	-1.39215	-0.216636	-0.657875	-0.715792	-0.4299	0.0800091	0.0780317	0.0795508	0.0953597
29919	RMC1	-0.641385	0.18067	-3.55004	0.000385166	0.0832177	34.6371	6.11968	0.105931	-1.22572	-2.98523	-3.50649	-2.59339	-0.254846	-0.617725	-1.20679	-0.7451	0.0432291	0.0428189	0.118445	0.0825457
133022	TRAM1L1	0.48529	0.137307	3.53435	0.000408774	0.0832565	0	2.46583	0.481499	1.95438	3.13238	0.259147	1.122	0.515635	0.748414	0.146624	0.264204	0.0696092	0.0570866	0.320125	0.0554485
5646	PRSS3	0.554558	0.156894	3.5346	0.000408398	0.0832565	0	3.59101	0.309149	1.61871	1.61096	-0.0874841	3.95189	0.479227	0.514694	-0.0359103	0.800127	0.0876483	0.102077	0.168492	0.0409928
336	APOA2	-0.630409	0.178524	-3.53122	0.00041364	0.0832565	0	3.73737	0.291255	-1.50095	-0.639519	-0.774048	-4.46977	-0.477438	-0.227322	-0.439202	-0.94071	0.101182	0.126351	0.321953	0.0442937
139285	AMER1	0.538753	0.152656	3.52919	0.000416841	0.0832565	0	2.43306	0.487511	3.014	1.37974	0.0573116	1.9741	0.849873	0.439148	0.0282028	0.488463	0.0795101	0.101305	0.242158	0.0612245
63910	SLC17A9	0.568851	0.161307	3.52652	0.000421065	0.0832565	0	2.04594	0.562926	1.16029	1.36354	0.699181	3.28449	0.45591	0.495658	0.241191	0.821538	0.154392	0.132138	0.118999	0.0625632
51304	ZDHHC3	0.47441	0.134692	3.52217	0.000428023	0.0836002	0	2.24999	0.522169	1.78126	0.579848	2.9206	1.61763	0.442883	0.166049	0.734995	0.488609	0.0618194	0.0820058	0.0633324	0.0912361
1827	RCAN1	0.428149	0.121697	3.51817	0.00043453	0.0838485	0	3.22102	0.358788	1.54549	0.7396	2.37411	2.83093	0.348833	0.166347	0.823397	0.559941	0.0509456	0.0505868	0.120286	0.0391226
6528	SLC5A5	0.491527	0.139945	3.51229	0.000444262	0.0841831	0	1.58065	0.663786	0.904635	1.1484	1.37431	3.14498	0.261798	0.342528	0.637436	0.652502	0.0837506	0.0889622	0.21513	0.0430454
64405	CDH22	-0.45903	0.130748	-3.51079	0.000446776	0.0841831	0	3.26925	0.351946	-0.992964	-1.59227	-0.970265	-3.53249	-0.254226	-0.432932	-0.257469	-0.771107	0.0655502	0.0739271	0.0704158	0.0476507
4978	OPCML	-0.454073	0.129478	-3.50696	0.00045326	0.0844118	4.28988	4.17929	0.242744	-1.06697	-1.46957	-1.40044	-4.36936	-0.225442	-0.297411	-0.618643	-0.694853	0.0446445	0.0409575	0.195141	0.0252901
23322	RPGRIP1L	0.519322	0.149403	3.47599	0.000508976	0.0936984	0	1.4788	0.687171	1.00827	1.42568	1.95336	2.58776	0.302457	0.398798	0.758041	0.685104	0.0899852	0.0782456	0.150598	0.0700916
129880	BBS5	-0.401117	0.115521	-3.47224	0.000516133	0.0939362	0	2.24235	0.523656	-1.56776	-3.31619	0.0697232	-0.915967	-0.347953	-0.572353	0.0406515	-0.215173	0.0492589	0.0297886	0.339938	0.0551843
3856	KRT8	-0.452504	0.130722	-3.46157	0.000537025	0.0966403	0	2.63784	0.450894	-1.72222	-2.60048	-2.0634	-0.796367	-0.486253	-0.64654	-0.673269	-0.176297	0.079716	0.0618137	0.106466	0.0490078
56164	STK31	0.380748	0.110294	3.45211	0.000556225	0.0978956	0	1.45891	0.691786	2.74361	1.67328	-0.00901845	1.74603	0.547442	0.396431	-0.00512789	0.290288	0.0398137	0.0561301	0.323306	0.027641
6391	SDHC	0.461562	0.133663	3.45317	0.000554033	0.0978956	0	0.87643	0.831112	1.25748	1.60845	1.8156	2.30999	0.313781	0.401394	0.603787	0.600185	0.0622665	0.0622764	0.110593	0.0675071
3061	HCRTR1	0.456528	0.133068	3.43077	0.000601866	0.104777	0	3.17997	0.364701	1.20586	1.83634	-0.173765	3.34651	0.297727	0.435595	-0.0817203	0.71307	0.0609592	0.0562681	0.221173	0.0454026
50814	NSDHL	0.43264	0.126587	3.41773	0.000631468	0.105427	0	1.8358	0.607176	1.90263	0.788836	2.05902	2.24384	0.43642	0.186439	0.629391	0.583365	0.0526139	0.0558599	0.0934375	0.0675921
1739	DLG1	0.466389	0.136216	3.42391	0.000617279	0.105427	0	1.19955	0.753112	1.04254	2.16965	1.11282	2.42694	0.289165	0.664892	0.330044	0.558553	0.0769313	0.0939127	0.0879621	0.0529676
341676	NEK5	0.455565	0.133246	3.41897	0.00062859	0.105427	0	2.77224	0.42809	1.22643	1.74313	0.276527	3.13727	0.308687	0.376189	0.137157	0.809962	0.0633512	0.0465749	0.246015	0.0666537
91966	CXorf40A	0.387122	0.113276	3.41753	0.00063193	0.105427	0	2.13742	0.544379	1.03039	2.73323	1.8907	1.30762	0.19486	0.573555	0.537516	0.338864	0.0357635	0.0440348	0.0808234	0.0671562
286046	XKR6	0.412512	0.121424	3.39729	0.000680576	0.112372	0	2.41001	0.491774	1.93663	2.68008	1.62927	0.603064	0.457593	0.587543	0.54824	0.133932	0.0558299	0.04806	0.113228	0.0493224
9099	USP2	-0.437334	0.130319	-3.35587	0.000791155	0.113135	1.42134	4.05767	0.255303	-1.46009	-1.50113	-0.437064	-4.08354	-0.293448	-0.318006	-0.169812	-0.738318	0.0403927	0.0448781	0.150955	0.0326899
79923	NANOG	0.681284	0.202875	3.35814	0.00078468	0.113135	36.0635	6.25621	0.0997891	5.00447	1.42726	0.518668	2.81924	1.14701	0.359455	0.27986	0.657788	0.0525314	0.063428	0.29114	0.0544388
84249	PSD2	-0.464543	0.137493	-3.37866	0.000728412	0.113135	0	3.13719	0.370953	-2.30175	-1.8643	-2.33952	-0.86895	-0.598774	-0.484629	-0.942022	-0.194352	0.0676724	0.0675751	0.162132	0.0500249
56000	NXF3	-0.637871	0.18958	-3.36465	0.000766409	0.113135	0	3.87464	0.275323	-0.743104	-0.765835	-3.21239	-2.77784	-0.251239	-0.310535	-1.06296	-0.784004	0.114307	0.164418	0.10949	0.0796567
1956	EGFR	-0.337379	0.100447	-3.35877	0.000782907	0.113135	0	0.544508	0.90901	-1.16077	-2.30634	-1.11464	-1.97909	-0.22671	-0.423674	-0.343964	-0.345767	0.038146	0.0337454	0.0952254	0.0305237
65059	RAPH1	0.355723	0.105612	3.3682	0.00075661	0.113135	0	2.73602	0.434141	0.890111	1.43523	0.441224	3.32174	0.1827	0.285929	0.160948	0.57643	0.04213	0.0396894	0.133062	0.0301137
49860	CRNN	0.569444	0.168925	3.37099	0.000748991	0.113135	0	3.3105	0.346184	1.35608	0.854227	0.844386	3.62075	0.428826	0.266998	0.404001	0.943251	0.0999981	0.0976945	0.22892	0.0678666
4288	MKI67	0.556271	0.164542	3.38073	0.000722935	0.113135	0	1.68552	0.640158	2.1862	1.10671	0.34044	2.64475	0.800202	0.409613	0.144445	0.648798	0.133974	0.136987	0.180022	0.0601799
11135	CDC42EP1	0.417216	0.123729	3.37202	0.000746194	0.113135	0	0.334904	0.953336	1.61267	1.52161	1.50829	2.12473	0.413787	0.362607	0.642866	0.408763	0.0658361	0.0567889	0.181666	0.0370113
26539	OR10H1	-0.48178	0.142963	-3.36996	0.0007518	0.113135	0	3.80306	0.283531	-2.34277	-2.16346	-2.73318	-0.705229	-0.508144	-0.490425	-1.05549	-0.172993	0.047045	0.0513862	0.149134	0.0601726
144132	DNHD1	0.44945	0.133759	3.36014	0.000779022	0.113135	0	3.32498	0.344181	0.392801	0.977137	2.54969	2.97716	0.111868	0.282417	0.818396	0.543546	0.081108	0.0835357	0.103027	0.0333326
51274	KLF3	0.528455	0.156356	3.37981	0.000725352	0.113135	0	2.20574	0.530818	1.18542	-0.146016	1.80854	2.98857	0.43885	-0.0665934	0.614621	0.665909	0.137053	0.207999	0.115494	0.0496483
114571	SLC22A9	0.455467	0.134461	3.38736	0.000705676	0.113135	0	1.25022	0.740986	1.14897	1.19214	1.07695	2.97041	0.310161	0.310378	0.555152	0.618405	0.0728715	0.0677847	0.265725	0.0433425
4705	NDUFA10	0.753594	0.223095	3.37791	0.000730401	0.113135	49.9832	7.99731	0.0460673	2.33036	0.915478	4.97336	2.88695	0.611138	0.311935	1.44699	0.626186	0.0687754	0.1161	0.0846515	0.0470467
83734	ATG10	0.548541	0.162765	3.37014	0.000751311	0.113135	0	1.00522	0.799989	1.71243	0.56252	1.5032	2.61813	0.587023	0.216932	0.543664	0.678996	0.117513	0.14872	0.130806	0.0672594
54852	PAQR5	-0.443669	0.132461	-3.34942	0.000809812	0.114778	0	2.38487	0.496456	-1.75595	-1.89143	0.581068	-2.57002	-0.506827	-0.435514	0.295926	-0.544567	0.0833101	0.053018	0.259365	0.0448983
5905	RANGAP1	0.546627	0.163593	3.34139	0.000833599	0.114926	0	3.96541	0.265224	1.86524	3.78485	0.498764	1.32951	0.411272	0.971064	0.207304	0.412426	0.0486173	0.0658262	0.172754	0.0962297
283208	P4HA3	0.491719	0.147202	3.34043	0.000836483	0.114926	0	0.144247	0.986044	1.93156	1.68924	1.2344	1.78732	0.582167	0.483254	0.500123	0.435664	0.0908404	0.0818405	0.164149	0.0594153
10109	ARPC2	0.328037	0.0981375	3.34262	0.000829902	0.114926	0	0.617428	0.892431	1.78634	2.13239	1.76506	0.967986	0.381667	0.43731	0.276968	0.231155	0.0456497	0.0420576	0.0246228	0.0570255
6572	SLC18A3	-0.419162	0.12552	-3.33941	0.000839555	0.114926	0	2.16685	0.538508	-2.43249	-2.27121	-1.4652	-0.310418	-0.527904	-0.458352	-0.715126	-0.0845242	0.0470986	0.0407272	0.238218	0.0741426
80194	TMEM134	0.464418	0.139231	3.33559	0.000851175	0.115529	0	1.76688	0.622168	2.68344	0.583131	1.4719	1.78484	0.628685	0.160498	0.497939	0.527968	0.0548886	0.0757545	0.114444	0.0875016
369	ARAF	0.557251	0.167386	3.32913	0.000871162	0.117248	2.87648	4.11847	0.248953	2.14976	1.36254	3.30772	1.16781	0.605996	0.349413	1.11582	0.324816	0.079462	0.0657629	0.113796	0.0773624
3442	IFNA5	0.515478	0.155269	3.3199	0.000900494	0.119193	0	3.61907	0.305644	3.57685	1.49246	1.37	0.770481	0.849223	0.40216	0.593054	0.201776	0.0563693	0.0726095	0.18739	0.0685829
80320	SP6	0.525619	0.158217	3.32214	0.00089331	0.119193	0	1.85279	0.603516	2.05458	0.591904	0.314997	2.8668	0.67941	0.213088	0.156358	0.657197	0.10935	0.129603	0.246391	0.0525529
2185	PTK2B	0.448961	0.135572	3.3116	0.000927653	0.121781	0	3.28154	0.35022	1.25716	0.707819	1.06653	3.54327	0.315939	0.180214	0.434429	0.733271	0.0631579	0.0648235	0.165918	0.0428274
1174	AP1S1	0.571165	0.172744	3.30643	0.000944932	0.123041	0	1.8339	0.607586	1.513	0.163811	2.35102	2.2188	0.449051	0.0864254	0.906438	0.644842	0.088087	0.278353	0.14865	0.0844638
10780	ZNF234	-0.495658	0.150373	-3.29619	0.000980064	0.125574	0	1.91547	0.590135	-1.53032	-1.23871	-2.5073	-1.61786	-0.496677	-0.441929	-0.97434	-0.359505	0.105337	0.127282	0.151011	0.0493774
59277	NTN4	-0.38476	0.116674	-3.29775	0.000974646	0.125574	0	2.28988	0.514463	-2.86713	-1.09913	-1.3247	-1.4077	-0.665627	-0.280874	-0.480709	-0.248852	0.0538973	0.0653017	0.131683	0.0312509
284992	CCDC150	0.466088	0.141664	3.29008	0.00100159	0.127313	0	1.9019	0.593014	0.943816	0.682224	1.87672	2.80147	0.287456	0.207659	0.706013	0.608599	0.0927616	0.0926507	0.141523	0.0471943
116179	TGM7	0.572619	0.174557	3.28042	0.00103653	0.127867	0	3.24372	0.355553	0.432981	1.03576	1.4283	3.50201	0.143852	0.406505	0.704234	0.853845	0.11038	0.154032	0.243104	0.059446
655	BMP7	0.511269	0.1556	3.28579	0.00101698	0.127867	0	3.57288	0.311432	2.62049	1.22088	0.17904	2.91164	0.664919	0.341175	0.0619759	0.81	0.0643833	0.0780923	0.119825	0.0773917
51657	STYXL1	0.594672	0.1813	3.28005	0.00103788	0.127867	29.0053	5.63422	0.130827	0.430143	3.16952	1.82653	3.5741	0.112111	0.851378	0.530263	0.864644	0.0679317	0.0721533	0.0842812	0.0585248
11273	ATXN2L	0.426996	0.130083	3.2825	0.0010289	0.127867	0	0.827886	0.842786	1.09953	1.02877	0.384973	3.03104	0.334378	0.356947	0.160352	0.518196	0.0924823	0.120385	0.173495	0.0292285
29841	GRHL1	0.394973	0.121114	3.26117	0.00110954	0.129805	0	1.23712	0.744115	2.49167	1.43992	0.209072	1.8833	0.582334	0.32206	0.0914016	0.379378	0.0546213	0.0500258	0.191123	0.0405793
23210	JMJD6	0.426887	0.130866	3.26203	0.00110618	0.129805	0	1.28811	0.731958	1.35032	0.653378	1.47851	2.73727	0.32136	0.212459	0.449244	0.605353	0.056638	0.105735	0.0923239	0.0489082
51281	ANKMY1	-0.484117	0.148238	-3.2658	0.00109156	0.129805	17.128	4.82672	0.184934	-2.28061	-0.239751	-1.79647	-4.10355	-0.516011	-0.0575706	-0.636474	-0.690448	0.0511938	0.057661	0.125522	0.0283102
8570	KHSRP	0.472053	0.144759	3.26096	0.00111035	0.129805	0	1.35392	0.71637	0.535098	1.99781	1.1153	2.54289	0.17443	0.582479	0.378321	0.601786	0.106261	0.0850061	0.115063	0.0560051
6993	DYNLT1	-0.415447	0.127269	-3.26432	0.00109726	0.129805	0	1.86664	0.600542	-1.03642	-0.713683	-2.11643	-2.54158	-0.265725	-0.201013	-0.49025	-0.650126	0.0657343	0.0793302	0.0536571	0.0654315
995	CDC25C	0.623917	0.191267	3.26202	0.00110622	0.129805	21.2187	5.07735	0.16622	1.29493	0.429435	3.18763	3.86748	0.412172	0.14561	1.18806	0.740856	0.101313	0.114972	0.138912	0.0366954
23155	CLCC1	0.394978	0.12095	3.26564	0.00109216	0.129805	0	1.58939	0.661798	2.15436	2.17108	0.90672	1.44112	0.56992	0.575493	0.337974	0.252249	0.0699829	0.0702634	0.138938	0.0306379
1453	CSNK1D	0.381038	0.117051	3.25533	0.00113263	0.1299	0	1.17083	0.760009	2.68109	1.45055	0.833698	1.33438	0.542628	0.381165	0.21289	0.308104	0.040962	0.0690492	0.0652069	0.0533137
389336	C5orf46	0.460613	0.14152	3.25476	0.00113487	0.1299	0	0.138504	0.986847	2.00217	1.40395	0.915686	1.97832	0.513169	0.382537	0.428286	0.484576	0.065693	0.074241	0.218763	0.0599972
8358	HIST1H3B	0.456268	0.140191	3.25461	0.00113549	0.1299	0	0.141576	0.986419	2.10373	1.58444	1.12453	1.59165	0.531415	0.427479	0.459724	0.404431	0.0638098	0.0727908	0.16713	0.0645646
57569	ARHGAP20	-0.419128	0.129083	-3.24698	0.00116639	0.132488	0	2.87485	0.411327	-1.57832	-0.63436	-1.64873	-2.7939	-0.408281	-0.141882	-0.588051	-0.673268	0.0669159	0.0500245	0.127213	0.0580702
134265	AFAP1L1	-0.496552	0.153727	-3.23009	0.00123753	0.13688	0	3.62969	0.304328	-0.133474	-2.84015	-0.913178	-2.93632	-0.041371	-0.80114	-0.366657	-0.58794	0.0960721	0.0795673	0.161216	0.0400921
8321	FZD1	0.524325	0.162304	3.23051	0.00123571	0.13688	0	3.56566	0.312346	0.25818	1.10462	1.3313	3.88498	0.087685	0.361829	0.541496	0.788669	0.115346	0.107295	0.165439	0.0412108
4807	NHLH1	-0.457301	0.141638	-3.22866	0.00124372	0.13688	0	2.98694	0.393643	-1.04826	-0.663753	-1.76735	-2.95774	-0.299274	-0.175319	-0.730767	-0.709155	0.0815078	0.0697658	0.170967	0.0574861
9077	DIRAS3	-0.46047	0.142661	-3.22773	0.00124779	0.13688	0	3.18628	0.363787	-1.3126	-1.335	-2.71529	-1.84545	-0.401543	-0.382056	-1.21321	-0.364294	0.0935828	0.0819011	0.199636	0.0389671
337	APOA4	0.739662	0.229451	3.22362	0.00126582	0.137914	52.9915	8.50911	0.0365823	4.29527	2.47016	-0.662441	5.0437	0.893398	0.576036	-0.366009	1.21434	0.0432623	0.0543812	0.305273	0.0579673
23116	TOGARAM1	-0.596527	0.18595	-3.20799	0.00133664	0.143676	0	3.32158	0.344651	-1.50727	-0.825014	0.135062	-3.64948	-0.593833	-0.352651	0.0676397	-0.860553	0.15522	0.182712	0.250804	0.0556024
1828	DSG1	0.546169	0.170207	3.20884	0.00133271	0.143676	0	3.34	0.342115	0.315225	1.76645	1.57539	3.0722	0.100051	0.515056	0.838225	0.81987	0.100739	0.0850174	0.283103	0.0712185
9085	CDY1	0.385841	0.120522	3.20142	0.00136753	0.146016	0	0.171302	0.982084	1.78356	1.34744	0.479621	2.27896	0.380974	0.364847	0.224054	0.425358	0.0456263	0.0733168	0.218227	0.0348367
3326	HSP90AB1	0.431109	0.134876	3.19633	0.00139189	0.147632	0	2.70981	0.438564	1.67483	1.99411	2.44312	0.419444	0.37498	0.556612	0.786587	0.118452	0.0501271	0.0779125	0.103658	0.0797511
5827	PXMP2	0.449226	0.140743	3.19181	0.00141386	0.148976	0	2.24531	0.523078	0.779998	0.675238	1.3109	3.10647	0.225258	0.219607	0.449835	0.685335	0.0834015	0.105773	0.117751	0.0486713
337876	CHSY3	-0.504269	0.158209	-3.18736	0.00143577	0.150296	0	2.62132	0.453763	-1.52686	0.225083	-1.03552	-3.05391	-0.554794	0.0945289	-0.437295	-0.664824	0.132029	0.176378	0.178333	0.0473916
83893	SPATA16	0.475238	0.149267	3.1838	0.00145353	0.151167	0	1.73252	0.629729	0.492533	1.82992	0.983697	2.70375	0.147678	0.524239	0.489813	0.645572	0.0899007	0.0820715	0.247935	0.0570108
6050	RNH1	0.4788	0.150568	3.17995	0.00147302	0.151857	0	3.38497	0.33599	1.83157	2.58837	-0.464157	2.24725	0.517041	0.640784	-0.183912	0.576054	0.0796898	0.0612874	0.156996	0.0657087
6764	ST5	0.377568	0.118779	3.17875	0.00147912	0.151857	0	1.68063	0.64125	1.93086	2.4176	0.83775	1.22893	0.396284	0.638136	0.461307	0.226308	0.0421224	0.0696722	0.303216	0.0339116
256472	TMEM151A	0.462562	0.14588	3.17083	0.00152003	0.153151	6.74764	4.28944	0.231859	2.84774	0.621409	2.22604	2.14478	0.720582	0.130103	0.756622	0.450403	0.0640274	0.0438348	0.115529	0.0440999
5252	PHF1	0.444364	0.140064	3.17258	0.00151088	0.153151	0	3.05851	0.382692	0.246698	0.953955	1.68281	3.09682	0.0751974	0.335032	0.428884	0.73366	0.0929127	0.123343	0.0649547	0.056125
157869	SBSPON	0.466457	0.147112	3.17076	0.00152042	0.153151	0	1.7952	0.615981	0.973874	1.82091	0.360941	2.73029	0.313085	0.563286	0.127835	0.641602	0.103352	0.0956927	0.125437	0.0552224
64708	COPS7B	0.405513	0.128197	3.1632	0.00156046	0.156202	0	2.41077	0.491634	2.63472	2.12848	0.76753	0.596079	0.603638	0.537913	0.260413	0.142684	0.052491	0.063868	0.115116	0.0572988
5710	PSMD4	0.365907	0.116009	3.15414	0.00160973	0.159145	0	3.05284	0.383551	1.51112	0.868924	2.78129	1.54318	0.327986	0.192419	0.819619	0.324806	0.0471101	0.0490381	0.0868425	0.0443015
55041	PLEKHB2	-0.465242	0.147473	-3.15477	0.00160624	0.159145	0	2.74491	0.43265	-1.62131	-0.494673	-0.574933	-3.08117	-0.541886	-0.172137	-0.180207	-0.714582	0.111708	0.121091	0.0982443	0.0537866
10882	C1QL1	0.469781	0.149215	3.14834	0.00164199	0.160873	0	2.76222	0.429758	1.78642	1.43257	-0.102443	2.72401	0.566308	0.427686	-0.037184	0.677783	0.100493	0.0891288	0.131749	0.0619105
1874	E2F4	0.418995	0.133148	3.14684	0.00165045	0.160873	0	1.79697	0.615595	2.74138	1.59463	1.01728	0.778905	0.67632	0.401095	0.312118	0.211616	0.0608646	0.0632663	0.0941368	0.0738122
285513	GPRIN3	-0.491868	0.156541	-3.14209	0.00167744	0.160873	0	1.0434	0.790753	-0.514792	-1.41683	-1.09862	-2.72704	-0.194326	-0.623472	-0.38754	-0.600995	0.142495	0.19364	0.124434	0.0485689
4618	MYF6	0.399993	0.127213	3.14427	0.00166503	0.160873	0	1.43944	0.696316	1.96121	0.446258	0.852562	2.55998	0.493192	0.119125	0.444759	0.481465	0.063239	0.0712576	0.272143	0.0353717
56918	C2orf83	-0.471828	0.150122	-3.14296	0.00167246	0.160873	0	0.899773	0.825483	-1.97258	-1.56763	-1.62226	-1.3408	-0.574593	-0.459081	-0.790382	-0.327964	0.0848497	0.0857612	0.237375	0.0598312
4967	OGDH	0.408031	0.129935	3.14027	0.0016879	0.160913	0	0.508662	0.916984	1.95632	1.23854	1.55744	1.60722	0.509766	0.356742	0.548188	0.325521	0.0678985	0.0829637	0.123889	0.0410209
3755	KCNG1	-0.479051	0.153185	-3.12727	0.00176437	0.165512	0	2.75392	0.431141	-1.69079	-1.54506	-2.56414	-0.844358	-0.567833	-0.486752	-0.926373	-0.21101	0.112788	0.0992488	0.130523	0.0624529
56850	GRIPAP1	0.422899	0.13511	3.13003	0.00174788	0.165512	0	2.62714	0.452752	1.78884	2.79368	0.908396	0.771011	0.438672	0.768154	0.330055	0.185104	0.0601365	0.0756037	0.132015	0.0576384
2054	STX2	0.470851	0.150733	3.12375	0.00178565	0.165512	0	3.63434	0.303752	0.0764009	2.03122	2.09075	2.7068	0.0211008	0.591723	0.723763	0.584429	0.0762783	0.0848641	0.119836	0.0466178
6843	VAMP1	0.495284	0.158494	3.12494	0.00177842	0.165512	2.50594	4.10281	0.250574	0.479192	2.3234	2.57833	2.21788	0.120403	0.604311	1.00427	0.507822	0.063133	0.0676509	0.151714	0.0524262
57215	THAP11	-0.370499	0.118621	-3.12339	0.00178781	0.165512	0	2.80908	0.422008	-0.707732	-1.61787	-2.9826	-0.741833	-0.16986	-0.348978	-0.670591	-0.210382	0.0576026	0.0465275	0.0505504	0.0804278
55879	GABRQ	-0.40081	0.128433	-3.12076	0.00180384	0.166036	0	0.686091	0.876471	-2.26335	-1.18019	-1.08156	-1.65526	-0.522587	-0.267215	-0.515506	-0.39061	0.0533107	0.0512647	0.227177	0.0556872
10534	SSSCA1	0.496881	0.159314	3.11889	0.00181536	0.166142	0	1.24644	0.741888	1.99831	1.48068	0.421902	2.14714	0.649022	0.449404	0.158084	0.62134	0.105485	0.0921194	0.140396	0.0837407
84735	CNDP1	-0.465823	0.149684	-3.11204	0.00185798	0.166375	0	1.45344	0.693057	-0.409746	-1.90221	-1.2222	-2.42036	-0.130071	-0.548188	-0.618385	-0.55879	0.10077	0.0830504	0.255995	0.053301
23532	PRAME	-0.420206	0.13532	-3.10528	0.00190101	0.166375	0	2.18048	0.535804	-0.706009	-1.55751	0.205993	-2.97599	-0.208888	-0.406629	0.114676	-0.591784	0.0875397	0.0681608	0.30991	0.0395426
25789	TMEM59L	0.524046	0.16844	3.11117	0.00186346	0.166375	0	1.99239	0.573989	0.660239	1.70951	0.488238	2.84167	0.226789	0.540668	0.245309	0.793895	0.117989	0.100028	0.252444	0.078051
7369	UMOD	0.360572	0.115959	3.10947	0.00187423	0.166375	0	1.01809	0.796874	1.88043	1.06567	0.451433	2.4107	0.396456	0.237251	0.165875	0.489146	0.0444505	0.0495644	0.135013	0.0411711
6470	SHMT1	0.401498	0.12888	3.11529	0.00183762	0.166375	0	3.08249	0.379081	0.590694	0.8079	2.25376	2.65874	0.154397	0.217312	0.836901	0.515365	0.0683205	0.0723524	0.13789	0.0375733
80331	DNAJC5	0.549308	0.17675	3.10783	0.00188469	0.166375	24.8725	5.32428	0.149534	1.71076	0.564686	3.92778	2.06651	0.412292	0.175879	1.05482	0.51321	0.0580809	0.0970093	0.0721213	0.0616757
54751	FBLIM1	0.36192	0.11639	3.10953	0.00187382	0.166375	0	2.41034	0.491712	2.23586	0.349282	0.299592	2.62082	0.51922	0.0866451	0.115952	0.460793	0.0539278	0.0615371	0.149795	0.0309127
84366	PRAC1	-0.507856	0.163474	-3.10666	0.00189216	0.166375	0	3.99536	0.261966	-0.35628	-3.2362	-0.755117	-2.63526	-0.0967065	-0.810736	-0.374506	-0.602723	0.0736764	0.062761	0.245974	0.0523104
10336	PCGF3	0.45255	0.145971	3.10029	0.00193334	0.168285	0	1.12119	0.771961	0.755715	1.7499	1.8531	1.9146	0.215347	0.469467	0.659406	0.534613	0.0812011	0.0719749	0.126621	0.0779687
23352	UBR4	0.433369	0.139886	3.09801	0.00194828	0.168533	0	1.78776	0.617602	1.06709	1.95463	0.51277	2.48258	0.263093	0.562164	0.186297	0.641268	0.0607879	0.0827177	0.131998	0.0667224
1271	CNTFR	0.352679	0.113944	3.09519	0.00196684	0.168533	0	1.01244	0.798241	1.91039	0.875755	0.241775	2.4734	0.402958	0.199612	0.116007	0.444564	0.0444916	0.0519525	0.230222	0.0323058
9745	ZNF536	-0.407179	0.131558	-3.09506	0.00196776	0.168533	0	3.01946	0.388635	-2.36826	-1.93916	-1.75036	-0.474683	-0.627796	-0.442812	-0.731094	-0.10865	0.0702716	0.0521451	0.174458	0.0523902
152503	SH3D19	-0.383885	0.124363	-3.0868	0.0020232	0.169412	0	0.117403	0.98967	-1.44878	-2.06676	-1.18139	-1.371	-0.362395	-0.406505	-0.480319	-0.334728	0.0625692	0.038686	0.165299	0.059609
1809	DPYSL3	-0.509198	0.165067	-3.0848	0.00203688	0.169412	0	3.4478	0.327596	-1.72845	0.127349	-1.65508	-3.05904	-0.556653	0.0441128	-0.619434	-0.718102	0.103718	0.119987	0.140072	0.0551063
50939	IMPG2	0.551027	0.178666	3.08413	0.00204149	0.169412	4.95014	4.20832	0.23983	1.13409	0.437016	2.84784	3.03707	0.386174	0.137289	1.10376	0.647959	0.115951	0.0986902	0.150216	0.0455183
6547	SLC8A3	-0.38599	0.125048	-3.08674	0.00202368	0.169412	0	2.19152	0.53362	-1.29483	-1.38185	-2.3392	-1.63141	-0.301613	-0.37565	-0.95604	-0.319931	0.0542598	0.0738999	0.167039	0.0384577
199953	TMEM201	-0.373196	0.120902	-3.08676	0.00202349	0.169412	0	2.65775	0.447455	-2.87225	-0.608289	-0.75888	-1.7292	-0.667425	-0.145607	-0.248101	-0.359911	0.053996	0.0572984	0.106883	0.0433209
246778	IL27	-0.483187	0.156571	-3.08605	0.00202835	0.169412	0	0.547648	0.908305	-1.53073	-0.919167	-1.04085	-2.40831	-0.470558	-0.30059	-0.466673	-0.604258	0.0944993	0.106945	0.201025	0.0629533
58538	MPP4	-0.380207	0.123583	-3.07652	0.00209431	0.171135	0	1.90224	0.592942	-1.18104	-2.09597	-2.06338	-1.14967	-0.255982	-0.456604	-0.839088	-0.278258	0.0469775	0.0474581	0.165369	0.0585804
79183	TTPAL	0.426045	0.138462	3.07697	0.00209116	0.171135	0	2.18683	0.534548	1.55341	1.03759	2.6904	0.962606	0.412641	0.271911	0.797769	0.277262	0.0705622	0.0686754	0.0879263	0.0829629
90187	EMILIN3	0.454489	0.14761	3.07898	0.00207707	0.171135	3.14169	4.12974	0.247791	1.67485	2.64705	2.51903	0.574885	0.412956	0.70478	0.72614	0.12406	0.0607935	0.0708895	0.0830947	0.0465693
79137	RETREG2	0.40516	0.13201	3.06915	0.00214668	0.173642	0	0.765818	0.857624	1.94088	0.747464	1.78911	1.63062	0.542239	0.209294	0.453048	0.404861	0.0780524	0.0784032	0.0641233	0.0616465
1539	CYLC2	0.526124	0.171399	3.06958	0.0021436	0.173642	0	3.4887	0.32223	-0.113597	0.903024	3.12031	2.19249	-0.0471204	0.376889	0.857039	0.544487	0.172061	0.174192	0.0754408	0.061674
57658	CALCOCO1	0.471194	0.153722	3.06523	0.00217505	0.175053	0	2.42896	0.488266	1.16032	2.82095	1.54027	0.384803	0.365547	0.775614	0.491042	0.127036	0.0992499	0.0755963	0.101635	0.108989
58985	IL22RA1	-0.476811	0.155798	-3.06043	0.00221016	0.176109	0	1.44235	0.695638	-1.5549	-1.03032	-2.03301	-1.7878	-0.458295	-0.334344	-1.04653	-0.441242	0.0868731	0.105304	0.264988	0.0609138
23426	GRIP1	0.425555	0.139003	3.06147	0.00220251	0.176109	0	2.55593	0.465268	1.7463	1.07146	0.293455	2.76493	0.459152	0.270864	0.105887	0.739985	0.0691313	0.0639074	0.130197	0.0716272
84269	CHCHD5	0.46711	0.152718	3.05865	0.00222338	0.176286	0	1.75394	0.625009	1.14304	0.798482	1.03014	2.84675	0.322046	0.265158	0.408134	0.738975	0.0793808	0.110275	0.156968	0.0673848
55024	BANK1	-0.495365	0.162222	-3.05363	0.00226092	0.177504	0	2.93484	0.401781	-1.10188	-1.91366	-2.69227	-0.367288	-0.363174	-0.671712	-0.816362	-0.117314	0.108632	0.123207	0.0919448	0.102021
4837	NNMT	0.521383	0.170724	3.05395	0.00225853	0.177504	0	3.74981	0.289779	1.2948	1.39497	0.0483864	3.61289	0.354844	0.41374	0.0245836	0.899244	0.0751056	0.087968	0.258133	0.0619507
387893	KMT5A	0.441017	0.144569	3.05057	0.00228409	0.178449	0	2.76034	0.43007	1.19975	0.500356	2.06644	2.47111	0.321701	0.140799	0.746741	0.668805	0.0718987	0.0791846	0.130586	0.0732511
124773	C17orf64	0.49955	0.163863	3.04858	0.00229928	0.178764	0	2.96154	0.397593	0.978662	0.621229	2.22253	2.44377	0.299726	0.210018	1.08819	0.661208	0.0937959	0.114291	0.239724	0.0732075
9918	NCAPD2	0.440285	0.144563	3.04563	0.00232193	0.179652	0	2.12135	0.547605	0.708232	0.925644	2.30658	2.17221	0.205514	0.264379	0.702275	0.604119	0.0842042	0.0815768	0.0926992	0.0773469
79836	LONRF3	-0.446501	0.146822	-3.04111	0.00235709	0.180629	0	2.12074	0.547728	-1.7168	-2.03239	0.567915	-1.99212	-0.452516	-0.595563	0.321248	-0.479995	0.069475	0.0858702	0.319975	0.0580551
152273	FGD5	-0.457006	0.150276	-3.04111	0.00235712	0.180629	0	1.49219	0.684075	-0.450614	-2.11522	-1.42009	-2.01163	-0.141594	-0.657609	-0.544571	-0.487792	0.0987363	0.0966546	0.147055	0.0587997
1089	CEACAM4	0.482652	0.159063	3.03435	0.00241052	0.181683	0	0.880908	0.830033	1.63719	1.02732	0.966738	2.32762	0.528548	0.379047	0.298114	0.670035	0.104224	0.136136	0.0950926	0.0828647
468	ATF4	0.505903	0.166765	3.03364	0.00241624	0.181683	15.7898	4.75002	0.191044	1.33528	0.240978	4.04171	1.84823	0.356149	0.0982136	0.913621	0.40536	0.0711404	0.166107	0.0510978	0.048103
54885	TBC1D8B	0.315424	0.103913	3.03547	0.00240163	0.181683	0	2.17433	0.537022	2.6155	1.97099	0.0820971	0.809947	0.50379	0.350673	0.0370129	0.150024	0.0371014	0.0316545	0.20326	0.0343089
5212	VIT	-0.395034	0.130209	-3.03385	0.00241455	0.181683	0	2.20074	0.531803	-1.80741	-0.168411	-1.54014	-2.39538	-0.515971	-0.0481997	-0.730318	-0.436928	0.0814962	0.0819117	0.224857	0.0332712
11130	ZWINT	0.412077	0.135942	3.03127	0.00243525	0.182257	0	0.396825	0.940898	1.49504	1.52486	0.62999	2.15133	0.411817	0.410387	0.224256	0.49053	0.0758756	0.0724319	0.126713	0.0519897
81832	NETO1	0.390191	0.129225	3.01947	0.0025322	0.188631	3.35205	4.13873	0.246868	2.4933	1.81688	2.47858	0.641254	0.53188	0.366011	0.788505	0.118923	0.0455071	0.0405825	0.101206	0.0343933
85569	GALP	-0.425186	0.141474	-3.0054	0.0026523	0.196663	0	2.31107	0.510404	-2.12583	-0.524809	-0.28233	-2.54347	-0.549195	-0.154183	-0.112624	-0.614904	0.0667416	0.0863117	0.159129	0.0584469
5949	RBP3	0.530191	0.176646	3.00143	0.00268712	0.198217	0	3.94974	0.266942	2.92631	2.40016	-0.434561	1.54584	0.833468	0.690174	-0.220511	0.387634	0.0811215	0.0826872	0.257489	0.0628804
92359	CRB3	0.35678	0.118974	2.99881	0.00271039	0.198217	0	1.02832	0.794399	1.61766	0.787377	0.219309	2.59544	0.427016	0.198869	0.096897	0.435623	0.0696812	0.0637924	0.195213	0.0281708
2949	GSTM5	-0.471699	0.157265	-2.9994	0.00270513	0.198217	0	2.22705	0.52664	-1.13212	-1.01606	-0.607936	-2.92229	-0.349643	-0.291791	-0.276463	-0.810865	0.0953819	0.0824719	0.206803	0.0769929
121214	SDR9C7	-0.363473	0.121328	-2.99577	0.0027375	0.19929	0	2.40815	0.492119	-2.60603	-1.31936	-1.33452	-1.03429	-0.672638	-0.289271	-0.538915	-0.202891	0.0666198	0.0480713	0.163076	0.038481
2852	GPER1	-0.450726	0.150562	-2.99362	0.00275687	0.199792	0	0.577652	0.901529	-1.25545	-0.56027	-1.2126	-2.48575	-0.453611	-0.204166	-0.537673	-0.509141	0.130547	0.132792	0.196607	0.0419528
7378	UPP1	0.440678	0.147316	2.99138	0.00277716	0.200355	0	3.06613	0.38154	2.88036	0.438448	1.47241	1.24869	0.838465	0.13538	0.470495	0.321868	0.0847375	0.0953398	0.102106	0.0664432
91703	ACY3	-0.461331	0.15431	-2.98964	0.00279305	0.200598	0	3.36582	0.338587	-1.85556	-1.59087	0.668739	-2.7566	-0.493395	-0.443279	0.325351	-0.669836	0.0707031	0.0776399	0.236697	0.059046
9557	CHD1L	0.359826	0.120458	2.98716	0.0028158	0.20133	0	1.31371	0.725879	0.619592	2.14192	1.15476	1.98285	0.146654	0.485381	0.322971	0.45717	0.0560244	0.0513523	0.0782249	0.053159
9524	TECR	0.483824	0.162145	2.9839	0.00284601	0.202586	0	3.3479	0.341031	1.64497	3.16115	0.1704	0.951146	0.439521	0.871645	0.0696588	0.303903	0.0713913	0.0760307	0.167115	0.102088
4919	ROR1	0.405118	0.13611	2.9764	0.0029165	0.204981	0	2.35727	0.501639	0.450176	1.08152	0.57945	3.08353	0.135542	0.294117	0.241894	0.633558	0.0906529	0.0739563	0.174268	0.042216
55504	TNFRSF19	-0.319683	0.107412	-2.97624	0.00291806	0.204981	0	1.24878	0.74133	-1.87347	-1.07591	-0.175033	-2.32566	-0.389116	-0.213291	-0.0622648	-0.423571	0.0431386	0.0393001	0.126545	0.0331712
5069	PAPPA	-0.478076	0.160521	-2.97828	0.00289867	0.204981	5.31982	4.22475	0.238196	-1.5256	-3.07945	-1.89306	-0.772449	-0.393251	-0.902068	-0.618748	-0.172922	0.066445	0.0858087	0.106832	0.0501141
55626	AMBRA1	-0.406275	0.136587	-2.97448	0.00293484	0.205259	0	1.82449	0.609619	-0.776568	-0.434029	-2.55005	-1.83789	-0.238465	-0.133473	-0.589277	-0.496612	0.0942958	0.0945698	0.0534	0.0730121
25903	OLFML2B	0.467401	0.157459	2.9684	0.00299354	0.208454	0	1.41858	0.701185	1.13542	0.6065	0.186913	2.92199	0.397548	0.225751	0.105463	0.62557	0.122593	0.138547	0.31836	0.0458347
156	GRK2	0.388835	0.131414	2.95887	0.00308774	0.208949	0	1.50194	0.681823	1.50859	1.63788	-0.0527982	2.30121	0.360734	0.391968	-0.0216565	0.557927	0.0571787	0.0572717	0.168244	0.0587818
11016	ATF7	0.468194	0.158482	2.95424	0.0031344	0.208949	0	2.82876	0.418787	0.718607	0.727692	3.01202	1.19921	0.264573	0.263224	0.875769	0.333039	0.135552	0.130844	0.0845403	0.077126
2217	FCGRT	0.384098	0.130114	2.952	0.0031572	0.208949	0	1.86962	0.599904	2.4273	1.66734	0.0414675	1.38217	0.545223	0.40554	0.0132508	0.390144	0.0504545	0.0591585	0.102111	0.0796757
6876	TAGLN	0.426521	0.144166	2.95855	0.00309093	0.208949	0	2.39543	0.494486	0.588442	2.60757	1.24153	1.56887	0.157241	0.735505	0.607273	0.376528	0.0714045	0.0795609	0.23925	0.0575999
25824	PRDX5	0.396729	0.134374	2.95242	0.00315295	0.208949	0	1.33252	0.721426	1.06024	1.85991	2.14543	0.929018	0.266587	0.478353	0.646713	0.253394	0.0632225	0.0661476	0.0908648	0.0743953
7106	TSPAN4	0.36635	0.123787	2.95952	0.00308117	0.208949	0	2.09209	0.553515	1.03906	2.50095	0.157202	1.86863	0.245943	0.672607	0.0649115	0.354912	0.0560256	0.0723293	0.170501	0.0360741
9331	B4GALT6	-0.441786	0.149481	-2.95547	0.00312191	0.208949	0	2.60584	0.456467	-2.48079	-2.10485	-0.18608	-0.84932	-0.665057	-0.650105	-0.0786285	-0.221098	0.0718685	0.0953948	0.178551	0.0677687
105	ADARB2	-0.554558	0.187319	-2.96051	0.00307134	0.208949	0	2.57003	0.462768	-0.496245	-0.340677	-2.34259	-2.34192	-0.227503	-0.161148	-1.08873	-0.612014	0.210176	0.22375	0.215999	0.0682936
8877	SPHK1	0.438	0.148351	2.95245	0.00315266	0.208949	0	3.15933	0.367705	1.43131	1.38565	-0.48465	2.90864	0.41386	0.402742	-0.213505	0.659045	0.0836065	0.0844786	0.194071	0.0513392
2982	GUCY1A1	-0.496055	0.168004	-2.95263	0.00315078	0.208949	0	1.86229	0.601474	-1.8922	-2.06098	-1.40549	-0.881393	-0.701172	-0.776886	-0.538523	-0.233101	0.137313	0.142091	0.146809	0.069944
644150	WIPF3	-0.38978	0.131645	-2.96084	0.00306803	0.208949	0	3.28824	0.349283	-0.71417	-2.38325	-2.39115	-0.950726	-0.185636	-0.5725	-0.75774	-0.204283	0.0675652	0.0577047	0.100422	0.0461693
79815	NIPAL2	-0.381128	0.128501	-2.96596	0.00301738	0.208949	0	0.308373	0.958446	-1.24264	-1.87162	-0.732923	-1.87643	-0.354379	-0.511857	-0.297752	-0.349439	0.0813286	0.0747933	0.165042	0.0346797
1525	CXADR	0.399769	0.135702	2.94593	0.00321985	0.212219	0	1.39013	0.70785	1.20654	0.729129	1.53318	2.39387	0.313503	0.197437	0.481886	0.603561	0.0675145	0.0733244	0.0987875	0.0635683
8382	NME5	0.371689	0.126379	2.94106	0.00327091	0.2147	0	1.2075	0.751206	2.38549	1.642	0.271406	1.18192	0.539323	0.40492	0.115124	0.257642	0.0511141	0.0608123	0.179926	0.047518
9328	GTF3C5	0.508584	0.173118	2.93778	0.00330571	0.21522	1.58679	4.06449	0.254584	1.1948	3.02502	0.146936	2.36086	0.327372	0.89861	0.0523569	0.650621	0.0750741	0.0882444	0.126966	0.0759481
225689	MAPK15	0.498502	0.169685	2.93781	0.00330541	0.21522	0	1.03044	0.793886	1.50488	1.18484	0.43648	2.40876	0.496511	0.393846	0.198761	0.705066	0.108857	0.110492	0.207365	0.0856786
114770	PGLYRP2	0.548812	0.187035	2.93428	0.0033432	0.215394	24.3657	5.28861	0.151843	2.43574	2.6178	2.39742	0.688406	0.626291	0.685032	1.17865	0.148757	0.0661133	0.0684774	0.241701	0.0466948
3837	KPNB1	-0.369072	0.125799	-2.93382	0.00334823	0.215394	0	0.704299	0.872192	-1.64633	-0.773734	-1.50151	-1.93597	-0.362134	-0.21962	-0.354265	-0.555501	0.0483842	0.0805679	0.0556674	0.0823328
9559	VPS26A	-0.456785	0.155699	-2.93377	0.00334872	0.215394	0	0.327176	0.954839	-1.43024	-1.36833	-0.571459	-2.16557	-0.455715	-0.457234	-0.244364	-0.525602	0.101524	0.111659	0.182854	0.0589072
2134	EXTL1	0.467341	0.159496	2.93012	0.00338833	0.21707	0	1.81724	0.611191	1.61961	1.54616	-0.433638	2.28058	0.49767	0.540778	-0.238435	0.549312	0.0944193	0.122329	0.302332	0.0580159
10002	NR2E3	0.367965	0.125722	2.92682	0.00342449	0.218033	0	3.81291	0.282388	0.344017	1.53955	0.975296	3.57469	0.0715039	0.350771	0.381907	0.587447	0.0432015	0.051911	0.153336	0.0270061
84898	PLXDC2	-0.410356	0.140232	-2.92626	0.00343059	0.218033	0	3.11003	0.37497	-0.105138	-0.781522	-2.6222	-2.14018	-0.0314942	-0.260248	-0.698995	-0.495352	0.0897311	0.11089	0.0710584	0.0535708
94103	ORMDL3	0.451191	0.15426	2.92487	0.003446	0.218044	0	0.653985	0.88397	1.57588	1.59708	1.62346	1.24062	0.544008	0.546735	0.571788	0.300564	0.119169	0.117193	0.124047	0.058694
1374	CPT1A	-0.416693	0.142518	-2.92379	0.003458	0.218044	1.49102	4.06054	0.255	-0.767237	-1.9858	-0.00253121	-3.64464	-0.184377	-0.469127	-0.000983743	-0.678122	0.0577502	0.0558096	0.151045	0.0346184
341032	C11orf53	0.538198	0.184456	2.91776	0.00352556	0.220473	3.31606	4.13719	0.247026	0.632629	1.31782	0.953448	3.79641	0.19065	0.420991	0.420053	0.938581	0.0908188	0.102054	0.194095	0.061122
53822	FXYD7	0.434463	0.148879	2.91823	0.00352027	0.220473	0	2.52667	0.470491	2.42268	2.07607	0.266616	0.890064	0.7146	0.613102	0.154463	0.203251	0.0870033	0.0872129	0.335643	0.052146
399947	C11orf87	-0.432353	0.148235	-2.91668	0.00353781	0.220473	0	2.81485	0.421062	-2.42921	-0.947074	-2.06233	-0.520266	-0.669359	-0.238595	-0.77335	-0.169054	0.0759258	0.0634681	0.140617	0.105585
114821	ZBED9	-0.38779	0.133052	-2.91458	0.00356163	0.221097	0	1.88579	0.596447	-2.29098	-1.72745	0.449509	-1.39495	-0.552026	-0.408785	0.244702	-0.328491	0.0580602	0.0559987	0.296347	0.0554538
51093	RRNAD1	0.439258	0.150929	2.91037	0.00361005	0.223238	0	0.451184	0.929478	1.65529	1.67219	0.791505	1.66095	0.449425	0.516388	0.25567	0.518453	0.0737168	0.0953637	0.10434	0.0974332
8369	HIST1H4G	0.44846	0.154168	2.9089	0.003627	0.223423	1.24394	4.05038	0.256075	0.076549	2.63644	1.39462	2.76256	0.0192983	0.603236	0.746725	0.578431	0.0635564	0.0523528	0.286687	0.043841
56961	SHD	-0.447193	0.153888	-2.90596	0.00366128	0.224671	0	2.99061	0.393075	-2.58274	-1.3574	-1.62064	-0.543764	-0.740614	-0.383201	-0.866013	-0.145243	0.0822287	0.0796968	0.285544	0.0713463
3707	ITPKB	0.421542	0.145282	2.90154	0.00371337	0.226922	0	0.750828	0.861188	0.917426	1.81291	1.89938	1.19741	0.25376	0.516895	0.566606	0.364889	0.0765076	0.0812929	0.0889892	0.0928619
133957	CCDC127	0.432424	0.149089	2.90045	0.0037263	0.226922	0	3.52894	0.317028	2.34241	0.0334439	2.40202	1.51509	0.575469	0.0101615	0.791706	0.368038	0.0603554	0.092317	0.108636	0.0590075
10459	MAD2L2	0.434818	0.150268	2.89362	0.00380823	0.228437	0	0.941869	0.815314	1.16753	2.27344	1.17416	1.18518	0.300226	0.654946	0.481014	0.354844	0.0661244	0.0829937	0.167826	0.0896416
460	ASTN1	0.391885	0.135409	2.89409	0.00380257	0.228437	0	3.42176	0.331053	1.03125	0.559856	0.995425	3.33792	0.247489	0.139429	0.39206	0.684292	0.0575954	0.0620228	0.155127	0.0420274
285175	UNC80	-0.488063	0.168485	-2.89677	0.00377024	0.228437	6.66894	4.28582	0.232209	-0.670641	-0.653583	-1.05326	-4.37918	-0.208796	-0.239419	-0.340973	-0.807508	0.0969317	0.134189	0.104801	0.0340023
148808	MFSD4A	-0.475647	0.164364	-2.89386	0.00380534	0.228437	36.764	6.32551	0.096804	-0.944685	-3.19959	-3.10181	-1.21124	-0.211264	-0.710318	-0.894378	-0.226054	0.0500121	0.0492853	0.0831406	0.0348309
91662	NLRP12	0.39137	0.135316	2.89227	0.00382474	0.228571	0	2.98152	0.394483	0.296131	0.423113	2.32805	2.37911	0.0789847	0.152946	0.576108	0.584384	0.0711408	0.130666	0.0612381	0.0603345
53407	STX18	0.435879	0.150769	2.89104	0.00383969	0.228612	0	2.47081	0.48059	1.37054	0.628373	2.78989	0.878732	0.418809	0.220915	0.799831	0.243478	0.0933784	0.123599	0.0821904	0.0767724
140766	ADAMTS14	-0.580175	0.200904	-2.88782	0.00387923	0.230011	55.8892	9.06808	0.0283993	-1.87942	-1.25492	-1.7836	-5.54775	-0.38618	-0.244132	-0.88132	-0.96038	0.0422215	0.0378455	0.244159	0.0299676
4745	NELL1	-0.459339	0.159117	-2.88679	0.00389193	0.230011	0	1.76253	0.623123	-0.912769	-1.76465	-0.085675	-2.47823	-0.312728	-0.538643	-0.0363162	-0.646819	0.117385	0.0931723	0.179677	0.0681211
91754	NEK9	0.610906	0.212003	2.88159	0.00395678	0.232984	27.0322	5.48187	0.139727	1.5915	0.0774223	2.11031	4.15154	0.509046	0.0265425	0.823288	0.958383	0.102306	0.117531	0.152199	0.0532916
440590	ZYG11A	-0.365939	0.127273	-2.87523	0.00403728	0.236141	0	2.47894	0.479109	-0.700722	-2.82694	-0.845156	-1.2446	-0.180763	-0.680568	-0.320537	-0.262376	0.0665466	0.0579575	0.143841	0.0444416
26280	IL1RAPL2	-0.395238	0.137473	-2.87503	0.00403987	0.236141	0	1.63816	0.650768	-1.95246	-1.8894	0.168621	-1.57911	-0.544268	-0.481323	0.0713152	-0.361844	0.0777074	0.0648968	0.178871	0.052507
5139	PDE3A	-0.418623	0.145873	-2.86978	0.00410754	0.239223	0	2.42672	0.48868	-2.09818	-0.222404	-0.903702	-2.32247	-0.59406	-0.0621067	-0.385299	-0.577098	0.0801634	0.0779816	0.181779	0.0617444
3669	ISG20	-0.379975	0.132522	-2.86725	0.00414049	0.23928	0	2.35499	0.502068	-0.640786	-0.977956	-2.35151	-1.91821	-0.164538	-0.242271	-0.677232	-0.523563	0.0659338	0.0613714	0.0829432	0.0744982
8331	HIST1H2AJ	0.38642	0.134816	2.86627	0.00415334	0.23928	0	0.882786	0.82958	1.48639	2.23403	0.769355	1.14287	0.400341	0.568246	0.236927	0.292817	0.0725423	0.0646988	0.0948366	0.0656442
27074	LAMP3	-0.45505	0.158689	-2.86756	0.0041365	0.23928	0	1.08999	0.779491	-0.667622	-0.674246	-0.210792	-2.89277	-0.294043	-0.312673	-0.102963	-0.570463	0.193981	0.215053	0.238591	0.038889
3170	FOXA2	0.29595	0.103333	2.86404	0.00418274	0.24011	0	2.96375	0.397248	1.45582	0.389431	0.138803	2.97928	0.268082	0.0811411	0.0555166	0.50448	0.0339093	0.0434131	0.159973	0.0286723
65989	DLK2	0.338222	0.11816	2.86241	0.00420429	0.240485	0	0.67964	0.877982	1.96516	1.17119	0.0975972	1.90525	0.467472	0.281802	0.0492116	0.332944	0.0565867	0.0578935	0.254249	0.0305378
6532	SLC6A4	-0.567019	0.198219	-2.86057	0.00422884	0.241019	31.0646	5.80254	0.121623	-1.78389	-0.109706	-3.57706	-2.70324	-0.579692	-0.0374575	-1.14985	-0.503982	0.105598	0.116577	0.10333	0.0347584
113115	MTFR2	0.36665	0.128268	2.85848	0.0042568	0.241019	0	2.63605	0.451204	1.33145	1.03488	-0.213429	2.81383	0.357742	0.240317	-0.0889631	0.591518	0.0721916	0.0539246	0.173746	0.0441916
654429	LRTM2	-0.459401	0.160724	-2.85833	0.00425877	0.241019	0	3.7484	0.289946	-2.4993	-2.45624	0.254358	-1.43123	-0.741297	-0.715996	0.152114	-0.268231	0.0879729	0.0849729	0.357642	0.0351235
11059	WWP1	0.57406	0.200938	2.8569	0.004278	0.241255	46.3681	7.45825	0.058641	1.49189	0.353921	4.14034	3.12272	0.423758	0.0960829	1.10798	0.640587	0.0806797	0.0737022	0.0716133	0.0420815
92521	SPECC1	0.391927	0.13724	2.85577	0.00429323	0.241264	0	0.864473	0.833992	1.3655	0.693395	1.22182	2.27633	0.3833	0.18856	0.495986	0.498992	0.0787944	0.0739502	0.164788	0.0480525
25875	LETMD1	0.447635	0.156865	2.85363	0.0043223	0.242049	0	3.04758	0.384347	0.921886	-0.463602	2.65539	1.81375	0.342768	-0.227471	0.734127	0.439538	0.138244	0.240748	0.0764338	0.0587268
6667	SP1	0.402672	0.14119	2.85199	0.00434466	0.242272	0	2.64767	0.449194	1.635	2.3789	-0.264942	1.54237	0.393567	0.654263	-0.0992209	0.435289	0.0579431	0.07564	0.140251	0.0796483
9175	MAP3K13	-0.454802	0.159667	-2.84843	0.00439348	0.242272	22.1716	5.13951	0.161862	-1.91107	-0.210366	-2.24744	-3.14876	-0.42568	-0.0484819	-0.66084	-0.748952	0.0496152	0.0531138	0.0864601	0.0565756
10233	LRRC23	0.427406	0.149958	2.85017	0.00436955	0.242272	0	1.47238	0.68866	1.16923	2.40877	0.796535	1.3387	0.37748	0.757939	0.361903	0.299861	0.104229	0.0990097	0.206431	0.0501737
5609	MAP2K7	0.437849	0.153685	2.849	0.00438575	0.242272	0	0.936665	0.816572	0.802281	2.08426	1.56816	1.26748	0.277816	0.68159	0.484398	0.336739	0.119912	0.10694	0.095416	0.070584
6866	TAC3	0.412425	0.144821	2.84782	0.00440193	0.242272	0	0.724669	0.867387	1.07363	1.73181	1.45125	1.60523	0.286799	0.458263	0.782995	0.401945	0.0713583	0.0700207	0.291093	0.0626985
1361	CPB2	0.494436	0.173762	2.84549	0.00443437	0.243222	14.4525	4.67577	0.197138	3.49364	0.625729	1.36239	1.83065	0.809127	0.138203	0.768387	0.47992	0.0536387	0.0487826	0.318094	0.0687269
5563	PRKAA2	0.498513	0.176011	2.83229	0.00462162	0.252627	27.8613	5.54487	0.135979	2.79752	3.6253	0.684329	0.581749	0.688354	0.847388	0.212391	0.148126	0.0605448	0.0546356	0.0963256	0.0648325
9238	TBRG4	0.413256	0.145988	2.83075	0.0046439	0.252982	0	3.4618	0.32575	3.04115	0.525577	1.65266	0.823669	0.709128	0.162856	0.597238	0.189844	0.054372	0.0960136	0.130595	0.0531234
117195	MRGPRX3	0.441943	0.156194	2.82945	0.00466278	0.25315	0	1.17493	0.759023	1.16808	0.903343	0.0722588	2.64482	0.402717	0.330131	0.0355564	0.577707	0.118866	0.133557	0.242134	0.0477115
23154	NCDN	0.366495	0.129654	2.82672	0.0047028	0.25446	0	0.523491	0.913701	1.66622	0.687011	0.994121	2.06815	0.449989	0.199487	0.316872	0.421511	0.0729353	0.0843141	0.101599	0.0415386
171568	POLR3H	0.320377	0.113421	2.82467	0.00473291	0.255227	0	1.35089	0.717086	1.07106	0.739006	0.734222	2.66407	0.244236	0.180371	0.219806	0.481923	0.051999	0.0595715	0.0896239	0.0327237
64759	TNS3	-0.416062	0.147522	-2.82034	0.00479723	0.257319	0	2.99619	0.392213	-2.17103	-2.17715	0.482074	-1.12463	-0.531185	-0.652133	0.214284	-0.311453	0.0598633	0.0897217	0.197584	0.0766941
114327	EFHC1	-0.44351	0.15731	-2.81934	0.00481221	0.257319	0	2.63827	0.450821	-1.87935	-2.1617	-1.49943	-0.36576	-0.591586	-0.768999	-0.494675	-0.100565	0.0990881	0.12655	0.108839	0.075597
7087	ICAM5	0.430278	0.15276	2.8167	0.00485204	0.257319	0	0.949478	0.813474	0.967717	1.52628	1.68677	1.66494	0.274625	0.415117	0.810637	0.469272	0.0805347	0.0739726	0.230962	0.0794422
29118	DDX25	-0.36531	0.129674	-2.81714	0.0048453	0.257319	0	2.13824	0.544216	-0.554696	-0.787771	-1.36516	-2.69863	-0.149429	-0.201328	-0.690542	-0.524514	0.0725707	0.0653141	0.255867	0.037777
8622		-0.365557	0.12974	-2.8176	0.00483839	0.257319	0	1.98744	0.575018	-0.268314	-1.3404	-0.644997	-2.76435	-0.0722186	-0.395943	-0.253528	-0.525496	0.0724457	0.0872568	0.154503	0.036137
8622	PDE8B	-0.365557	0.12974	-2.8176	0.00483839	0.257319	0	1.98744	0.575018	-0.268314	-1.3404	-0.644997	-2.76435	-0.0722186	-0.395943	-0.253528	-0.525496	0.0724457	0.0872568	0.154503	0.036137
204	AK2	0.708877	0.252223	2.81051	0.00494627	0.259554	74.8061	15.8769	0.00120183	0.354359	2.93252	3.90978	5.57189	0.0699139	0.657685	1.06587	1.08327	0.0389261	0.0502983	0.0743193	0.0377977
55815	TSNAXIP1	0.645096	0.229769	2.80759	0.00499143	0.259554	36.4945	6.29867	0.0979499	0.743958	3.22823	0.657353	3.55672	0.211406	1.08602	0.263099	0.957311	0.0807492	0.113174	0.160192	0.0724448
56975	FAM20C	0.364696	0.129885	2.80784	0.00498754	0.259554	0	2.73448	0.4344	0.905412	0.590929	2.57344	1.68132	0.268485	0.183934	0.865409	0.313625	0.0879321	0.0968847	0.113087	0.0347951
171546	SPTSSA	0.45501	0.16196	2.8094	0.00496347	0.259554	11.0426	4.49654	0.2126	3.8059	1.17455	0.563664	1.20708	0.863799	0.294853	0.214545	0.29125	0.0515122	0.0630183	0.144876	0.0582187
1789	DNMT3B	-0.289108	0.102798	-2.81238	0.00491762	0.259554	0	1.48677	0.685326	-0.599195	-2.21155	-0.33143	-2.00909	-0.127356	-0.494607	-0.164338	-0.288685	0.0451755	0.0500183	0.245862	0.0206466
120066	OR5P3	-0.465909	0.165804	-2.81001	0.00495403	0.259554	7.05339	4.30355	0.230497	-0.563096	-0.885187	-2.48189	-3.08343	-0.158396	-0.244391	-1.05712	-0.611433	0.0791267	0.0762256	0.181418	0.0393214
1237	CCR8	-0.501501	0.178857	-2.80392	0.00504851	0.260986	22.0379	5.1307	0.162473	-2.13851	-0.00181193	-3.13244	-2.10059	-0.535738	-0.000547731	-0.985323	-0.500372	0.0627598	0.0913801	0.0989446	0.0567419
80712	ESX1	0.388528	0.138575	2.80373	0.00505155	0.260986	0	0.364915	0.947391	1.16132	2.05734	0.715481	1.46033	0.30699	0.492188	0.277754	0.395169	0.0698792	0.0572332	0.150704	0.0732255
594855	CPLX3	-0.410633	0.146585	-2.80133	0.00508928	0.26125	0	1.9258	0.587949	-0.660537	-1.92528	-1.98144	-1.30542	-0.17944	-0.579286	-0.751075	-0.337247	0.0737979	0.0905312	0.143683	0.0667419
5243	ABCB1	-0.472595	0.168673	-2.80184	0.00508116	0.26125	0	3.66368	0.300146	-0.637064	-2.01581	-0.0725745	-3.18718	-0.240806	-0.717593	-0.024059	-0.688591	0.142879	0.126723	0.109897	0.0466778
4689	NCF4	0.398182	0.142238	2.7994	0.00511976	0.261975	0	0.955194	0.812092	1.57552	1.37194	1.96079	0.763314	0.39938	0.425127	0.614321	0.209597	0.0642576	0.0960212	0.0981583	0.0753984
170626	XAGE3	0.333592	0.119352	2.79504	0.00518935	0.26469	0	2.45589	0.483316	1.66613	1.36094	2.29972	0.59266	0.367759	0.300476	0.747429	0.133548	0.04872	0.0487459	0.10563	0.0507768
124626	ZPBP2	-0.378389	0.135521	-2.79211	0.00523653	0.265598	6.22996	4.26575	0.23416	-2.49796	-0.416071	-1.88414	-2.29677	-0.565152	-0.0785731	-0.834426	-0.408795	0.0511867	0.0356626	0.196132	0.0316794
31	ACACA	-0.333432	0.119429	-2.79188	0.00524032	0.265598	0	2.21825	0.528363	-0.980699	-0.965438	-0.0820003	-2.8482	-0.234414	-0.220207	-0.0327946	-0.546789	0.0571341	0.052025	0.159946	0.0368551
5146	PDE6C	-0.351228	0.125884	-2.7901	0.00526919	0.266219	0	1.61933	0.655016	-0.679281	-1.86445	0.186604	-2.33057	-0.178165	-0.426952	0.0949025	-0.460329	0.0687934	0.0524389	0.25865	0.0390133
56246	MRAP	0.356898	0.12798	2.78869	0.00529212	0.266331	0	1.61868	0.655162	2.4553	1.33415	0.596182	1.10977	0.624837	0.334474	0.19145	0.248121	0.0647626	0.0628512	0.103123	0.0499876
81034	SLC25A32	0.368785	0.132411	2.78516	0.00535008	0.266331	0	2.86552	0.412827	1.05421	0.43608	1.81069	2.45816	0.270126	0.106367	0.751171	0.561178	0.0656566	0.0594953	0.172104	0.0521172
2321	FLT1	0.394883	0.141707	2.78662	0.00532615	0.266331	0	1.321	0.724152	0.713891	1.50639	1.9108	1.6298	0.180227	0.472397	0.636496	0.421831	0.0637347	0.0983427	0.110959	0.0669897
55227	LRRC1	-0.407768	0.146422	-2.78489	0.00535455	0.266331	0	1.42538	0.699598	-2.0299	-1.65863	-0.229083	-1.50232	-0.654408	-0.564467	-0.110628	-0.306026	0.103932	0.115818	0.233208	0.0414949
2676	GFRA3	0.446793	0.160416	2.78521	0.00534925	0.266331	0	1.29021	0.73146	1.44719	1.14555	0.121153	2.37198	0.483274	0.361306	0.0539554	0.616605	0.111516	0.0994765	0.198335	0.0675756
27132	CPNE7	-0.392145	0.140894	-2.78325	0.00538165	0.26685	0	3.86881	0.275983	-0.784376	-1.2844	0.546336	-3.96407	-0.20148	-0.32898	0.317372	-0.600534	0.0659805	0.0656055	0.337456	0.0229505
27299	ADAMDEC1	-0.407981	0.146694	-2.78117	0.00541635	0.267741	0	0.00876855	0.999782	-1.11701	-1.30236	-0.743121	-2.06097	-0.392408	-0.391444	-0.410728	-0.420478	0.123413	0.0903394	0.305485	0.041624
2891	GRIA2	0.36384	0.130961	2.77823	0.00546558	0.268517	0	2.62097	0.453825	-0.0106286	0.855101	1.81458	2.51307	-0.00294369	0.314547	0.614901	0.465298	0.0767066	0.135312	0.114831	0.0342809
58485	TRAPPC1	0.374885	0.134922	2.77853	0.0054606	0.268517	0	1.88343	0.59695	0.767748	1.58765	2.47158	0.620371	0.210624	0.411234	0.641196	0.179966	0.0752627	0.0670912	0.0673029	0.084155
4830	NME1	-0.350657	0.12628	-2.77681	0.0054895	0.268868	0	0.944248	0.814739	-0.772275	-1.30884	-0.910799	-2.34859	-0.187029	-0.370431	-0.286537	-0.488965	0.0586506	0.0801014	0.0989731	0.0433451
80313	LRRC27	-0.484464	0.174697	-2.77316	0.00555141	0.271071	26.0088	5.40605	0.144367	-2.85324	-0.659662	-2.94709	-1.05532	-0.720853	-0.158186	-0.908966	-0.261754	0.0638288	0.0575034	0.0951278	0.0615209
25818	KLK5	0.339206	0.122376	2.77183	0.00557414	0.271354	0	3.55528	0.313663	3.07324	1.87504	-0.38456	0.661739	0.577204	0.354213	-0.225272	0.134343	0.0352748	0.035687	0.343152	0.041215
3065	HDAC1	0.420827	0.151949	2.76953	0.00561381	0.272457	13.3047	4.61386	0.202356	0.682447	1.49109	3.57806	1.10391	0.174614	0.314682	0.853739	0.313382	0.0654665	0.0445385	0.0569317	0.0805899
8838	WISP3	0.332353	0.120408	2.76022	0.00577633	0.279158	0	2.43737	0.486716	0.767493	1.04367	1.46451	2.49661	0.176836	0.207566	0.717665	0.548854	0.0530878	0.039554	0.240137	0.0483293
54413	NLGN3	-0.440455	0.159746	-2.75722	0.00582946	0.279158	0	3.14817	0.369339	-2.45792	-1.00976	0.200277	-2.03187	-0.763843	-0.302585	0.0803056	-0.551359	0.0965766	0.0897969	0.160779	0.0736338
53826	FXYD6	-0.426831	0.154835	-2.75669	0.00583902	0.279158	0	1.83771	0.606763	-0.364003	-1.86492	-2.02598	-1.31226	-0.132442	-0.685602	-0.650317	-0.317766	0.132385	0.135153	0.103034	0.0586374
79847	MFSD13A	0.597388	0.216639	2.75752	0.00582415	0.279158	28.2043	5.57137	0.134432	0.391296	0.887993	2.34589	3.91663	0.122179	0.355029	0.742749	1.03184	0.0974954	0.159849	0.100247	0.0694061
5729	PTGDR	-0.472023	0.171159	-2.7578	0.00581917	0.279158	0	2.9235	0.403571	-0.861132	-0.835549	0.0325268	-3.01467	-0.33886	-0.339168	0.0133812	-0.760852	0.154847	0.164773	0.169241	0.0636974
2121	EVC	0.447558	0.162461	2.75486	0.0058717	0.2794	11.0263	4.49571	0.212673	2.47784	2.67053	-0.578851	1.92933	0.635033	0.72035	-0.236669	0.374331	0.0656818	0.0727601	0.167167	0.0376442
1363	CPE	-0.390127	0.141635	-2.75446	0.00587897	0.2794	0	3.27987	0.350454	-2.6172	-1.64954	0.587686	-1.41692	-0.61788	-0.414976	0.244723	-0.357384	0.0557359	0.0632878	0.173403	0.0636176
2562	GABRB3	0.460752	0.167412	2.7522	0.00591965	0.279673	44.0358	7.14743	0.0673442	2.96178	2.69205	-1.05924	4.07778	0.613956	0.539882	-0.381542	0.651314	0.0429705	0.040219	0.129746	0.0255113
6121	RPE65	0.371182	0.134861	2.75233	0.00591722	0.279673	0	0.27999	0.963747	2.04385	1.39263	0.645723	1.14963	0.456071	0.368712	0.286736	0.291417	0.0497927	0.0700979	0.197185	0.0642565
28316	CDH20	0.406863	0.147968	2.74967	0.0059656	0.280557	0	0.0345036	0.998313	1.41862	1.19512	0.772138	1.88632	0.396429	0.366668	0.455529	0.428586	0.0780907	0.0941296	0.348051	0.0516234
7090	TLE3	0.398144	0.14482	2.74924	0.0059734	0.280557	0	0.940972	0.815531	0.784219	1.04822	1.36528	2.21845	0.234257	0.356293	0.356568	0.611592	0.0892298	0.115534	0.0682085	0.0760019
1029	CDKN2A	0.382795	0.139377	2.74648	0.00602387	0.2821	10.4489	4.46672	0.215278	2.25067	2.8181	-0.965004	2.04224	0.418711	0.551143	-0.38993	0.444559	0.0346102	0.0382486	0.163273	0.0473854
10961	ERP29	0.480253	0.174975	2.7447	0.00605666	0.282809	31.1673	5.81119	0.121166	2.04948	0.0294093	1.46092	4.16804	0.388345	0.00977402	0.457605	0.883608	0.0359045	0.110453	0.0981139	0.0449424
5629	PROX1	-0.386049	0.140957	-2.73877	0.00616697	0.286024	0	3.87981	0.274739	-0.184881	-2.58276	-2.11494	-1.5326	-0.0433423	-0.574873	-0.729293	-0.344451	0.0549592	0.0495422	0.118908	0.0505123
57513	CASKIN2	-0.398379	0.145493	-2.73812	0.00617908	0.286024	0	2.87087	0.411965	-0.530211	-1.57886	-0.340224	-2.73469	-0.136764	-0.472915	-0.140801	-0.70084	0.0665343	0.0897175	0.171269	0.0656785
54939	COMMD4	0.341304	0.124641	2.73829	0.00617594	0.286024	0	0.372394	0.945884	1.27699	1.3392	0.491113	2.05068	0.338947	0.371714	0.161426	0.387964	0.0704509	0.0770422	0.10804	0.0357922
8019	BRD3	0.373323	0.136452	2.73594	0.00622032	0.287103	0	2.31057	0.510498	0.137145	2.43654	1.50073	1.26023	0.0386384	0.605907	0.416036	0.36491	0.0793739	0.0618393	0.0768526	0.0838436
388951	TSPYL6	0.396309	0.145003	2.73312	0.00627382	0.28874	0	0.973935	0.807558	2.28261	1.35454	0.802767	0.868523	0.582349	0.364916	0.41882	0.226185	0.0650884	0.0725775	0.272192	0.0678213
7220	TRPC1	-0.36487	0.13385	-2.72597	0.00641124	0.292542	0	0.78274	0.853591	-1.24996	-2.17707	-0.746794	-1.16358	-0.315787	-0.555055	-0.286481	-0.274489	0.0638257	0.0650019	0.14716	0.0556491
2259	FGF14	0.332215	0.121868	2.72603	0.00641017	0.292542	0	1.90006	0.593407	0.685391	0.689666	1.25789	2.60837	0.159203	0.180173	0.392986	0.533541	0.0539544	0.0682499	0.0976041	0.0418405
9963	SLC23A1	-0.384488	0.140958	-2.72767	0.00637829	0.292542	0	0.937277	0.816424	-1.31452	-0.839482	-0.115458	-2.43546	-0.347938	-0.247894	-0.0679672	-0.522795	0.0700602	0.0871987	0.346536	0.0460788
8000	PSCA	-0.400835	0.147221	-2.72267	0.0064756	0.29464	0	2.32973	0.50685	-2.47577	-0.572401	-1.30895	-1.25388	-0.726621	-0.179427	-0.673183	-0.276459	0.0861378	0.098259	0.264495	0.0486125
8078	USP5	0.463403	0.170442	2.71882	0.00655144	0.295326	0	0.471008	0.925213	1.20324	1.3992	1.60138	1.37587	0.366031	0.430606	0.738519	0.475963	0.0925404	0.0947104	0.212682	0.119672
3659	IRF1	-0.350262	0.12886	-2.71817	0.00656444	0.295326	0	1.53611	0.673962	-0.998385	-1.96107	-0.712655	-1.89053	-0.26629	-0.549388	-0.165189	-0.491206	0.0711401	0.0784824	0.0537283	0.0675087
11258	DCTN3	0.298272	0.109721	2.71844	0.00655897	0.295326	0	1.46576	0.690194	0.7978	2.1957	1.51807	1.04575	0.182423	0.503846	0.377021	0.195084	0.0522845	0.0526564	0.0616802	0.0348009
127124	ATP6V1G3	0.392373	0.144309	2.71897	0.00654854	0.295326	0	3.61374	0.306307	2.86547	1.7628	-0.274829	1.25065	0.723462	0.45079	-0.119102	0.255484	0.0637441	0.0653948	0.187808	0.0417308
2355	FOSL2	0.422978	0.155678	2.71701	0.0065875	0.295533	0	0.338769	0.95258	1.057	1.00007	1.75047	1.59353	0.379742	0.412424	0.596926	0.365251	0.12907	0.170069	0.116286	0.0525364
7252	TSHB	0.362565	0.133536	2.71511	0.0066253	0.296399	0	2.62099	0.453822	1.7992	2.28876	-0.539007	1.1076	0.442501	0.585863	-0.29356	0.242194	0.060488	0.0655229	0.296622	0.0478147
255426	RASGEF1C	-0.359675	0.132557	-2.71336	0.00666038	0.297138	0	2.78053	0.426715	0.14502	-1.20364	-0.574095	-2.88851	0.0452934	-0.342963	-0.225644	-0.547155	0.0975475	0.0811902	0.154484	0.0358816
7626	ZNF75D	0.53821	0.199042	2.70401	0.00685085	0.303801	0	3.26788	0.352138	0.33334	0.443229	2.78208	1.88443	0.169263	0.223515	1.18091	0.477195	0.257838	0.254307	0.180174	0.0641259
26548	ITGB1BP2	-0.47525	0.176051	-2.6995	0.00694435	0.304136	6.57598	4.28155	0.232623	-1.86384	-0.760743	-0.184915	-3.47725	-0.586768	-0.230198	-0.0640374	-0.817784	0.0991099	0.0915647	0.119928	0.0553102
221938	MMD2	0.63953	0.236845	2.7002	0.00692976	0.304136	62.0935	10.5523	0.0144105	5.77083	1.60057	-0.332742	3.74917	1.15138	0.366493	-0.15793	0.793317	0.039807	0.0524301	0.225276	0.0447737
56965	PARP6	0.374664	0.138802	2.69927	0.00694921	0.304136	0	2.3174	0.509197	0.23751	-0.145238	1.37522	2.7631	0.0839172	-0.0632029	0.425077	0.520811	0.124835	0.189372	0.0955409	0.0355278
284098	PIGW	0.432125	0.160151	2.69823	0.00697086	0.304211	0	3.95093	0.266812	3.29117	1.48434	0.434009	0.871456	0.815216	0.398458	0.274998	0.180125	0.0613544	0.0720603	0.401478	0.0427228
1420	CRYGC	0.399522	0.148182	2.69615	0.00701458	0.305287	0	3.0768	0.379935	1.01528	2.48909	-0.560795	1.75737	0.292435	0.671892	-0.273048	0.426594	0.0829632	0.0728646	0.237067	0.0589258
28	ABO	-0.372433	0.138356	-2.69184	0.00710581	0.308419	0	0.954543	0.812249	-1.19503	-1.84287	-1.59265	-0.916383	-0.341382	-0.446237	-0.652715	-0.222407	0.081606	0.0586327	0.167961	0.0589038
63874	ABHD4	0.417144	0.1552	2.68778	0.00719296	0.309765	0	2.91597	0.404763	1.05776	2.74595	0.162453	1.20608	0.330125	0.793911	0.0556496	0.367599	0.0974049	0.0835908	0.117346	0.0928968
5696	PSMB8	0.386598	0.14384	2.68769	0.00719484	0.309765	0	3.54899	0.314463	1.86336	0.10095	0.461471	3.02839	0.490759	0.0299868	0.147014	0.633806	0.0693652	0.0882362	0.101491	0.0438015
54474	KRT20	0.318833	0.118626	2.68772	0.00719424	0.309765	0	1.27267	0.735632	1.64875	1.29902	-0.281989	2.00279	0.38274	0.313541	-0.115718	0.369353	0.0538889	0.0582581	0.168398	0.0340106
7053	TGM3	0.50995	0.189891	2.68549	0.00724236	0.310975	0	3.53059	0.316816	1.09989	0.963196	2.95706	0.992374	0.377551	0.430133	1.12975	0.274755	0.11783	0.199424	0.145964	0.0766553
23587	ELP5	0.518409	0.19318	2.68355	0.00728448	0.311355	49.0492	7.85071	0.0492	0.175183	4.00673	1.98102	2.72379	0.0386228	0.86377	0.830168	0.48952	0.0486072	0.0464746	0.175611	0.0322993
51292	GMPR2	0.326961	0.12185	2.68329	0.0072901	0.311355	0	2.04994	0.562105	0.483867	0.523132	1.87983	2.2822	0.123565	0.139703	0.532837	0.451514	0.0652139	0.0713168	0.0803435	0.0391411
84671	ZNF347	-0.429517	0.160301	-2.67944	0.00737454	0.314124	0	0.100239	0.991809	-1.46943	-1.54084	-0.717699	-1.4937	-0.464271	-0.476798	-0.32168	-0.406877	0.0998266	0.0957528	0.200893	0.0741996
7455	ZAN	-0.439613	0.164198	-2.67733	0.00742123	0.315274	34.7299	6.12838	0.105528	-3.97993	-0.38543	-0.530353	-2.85603	-0.812383	-0.0879278	-0.201836	-0.490526	0.0416649	0.0520429	0.144833	0.0294985
23170	TTLL12	0.440953	0.16548	2.6647	0.00770576	0.317783	0	3.90892	0.271468	0.995407	3.1238	1.43443	0.552428	0.299766	0.928427	0.396074	0.158315	0.0906907	0.0883341	0.0762419	0.0821286
2618	GART	0.38499	0.143987	2.67377	0.00750036	0.317783	18.6492	4.91698	0.177978	2.69239	1.29039	2.68023	0.231508	0.614042	0.281073	0.650815	0.0492714	0.0520138	0.0474455	0.0589617	0.0452957
1659	DHX8	0.404318	0.151585	2.66726	0.00764715	0.317783	0	2.61052	0.455648	-0.119258	1.67768	1.68884	2.01092	-0.0377062	0.508435	0.624198	0.513968	0.0999657	0.0918447	0.136605	0.0653251
260434	PYDC1	0.372443	0.139885	2.66249	0.00775646	0.317783	0	2.56785	0.463153	2.40952	1.85573	0.110254	0.62853	0.615007	0.520934	0.0581809	0.142431	0.0651477	0.0788019	0.278468	0.0513521
860	RUNX2	-0.38986	0.146465	-2.66179	0.0077727	0.317783	0	2.62159	0.453717	-2.24765	-1.85331	-0.77683	-0.785215	-0.740749	-0.627474	-0.233777	-0.186941	0.108614	0.114629	0.0905631	0.0566805
3906	LALBA	-0.388653	0.14571	-2.66731	0.00764611	0.317783	0	1.44201	0.695718	-1.33358	-2.28354	-0.977008	-0.780388	-0.360199	-0.632028	-0.484677	-0.193439	0.0729537	0.0766047	0.246098	0.0614424
93190	C1orf158	0.521171	0.195486	2.66602	0.00767546	0.317783	25.852	5.39461	0.14508	3.48614	1.59718	1.60061	0.580406	0.95032	0.4382	0.703348	0.136215	0.0743104	0.075273	0.193094	0.0550787
5536	PPP5C	0.401771	0.151002	2.6607	0.00779774	0.317783	0	0.600255	0.896374	1.33247	1.26132	0.306192	2.05413	0.373427	0.391494	0.13462	0.520557	0.0785409	0.0963388	0.193299	0.0642215
23093	TTLL5	0.432114	0.161891	2.66916	0.00760404	0.317783	0	3.72572	0.292645	2.60763	2.31056	0.26802	0.693914	0.750624	0.651166	0.0929782	0.180168	0.0828613	0.0794237	0.120344	0.0674134
474344	GIMAP6	0.40352	0.151633	2.66117	0.00778698	0.317783	0	0.932603	0.817554	1.52308	0.321741	1.87209	1.44444	0.563824	0.11984	0.507119	0.368564	0.137038	0.138737	0.073378	0.065107
147040	KCTD11	0.386638	0.14511	2.66445	0.00771152	0.317783	0	1.88867	0.595831	1.39781	0.0394671	1.7829	1.96311	0.418703	0.0128545	0.63365	0.450349	0.0897257	0.106082	0.126312	0.0526271
1188	CLCNKB	-0.390224	0.146162	-2.6698	0.00758973	0.317783	0	0.943458	0.81493	-1.52101	-1.83607	-1.23995	-0.921513	-0.428613	-0.567884	-0.502973	-0.219129	0.079408	0.0956627	0.164545	0.0565453
51075	TMX2	0.528595	0.19799	2.66981	0.00758938	0.317783	50.3085	8.04967	0.0449964	1.62816	0.324707	3.57298	3.15489	0.349852	0.0762725	0.95766	0.798672	0.0461715	0.0551763	0.071839	0.0640869
3931	LCAT	0.445794	0.166869	2.67152	0.00755079	0.317783	0	3.12711	0.37244	0.380043	2.81031	0.964252	1.27907	0.1342	0.918253	0.458973	0.319266	0.124692	0.106762	0.226565	0.0623038
5753	PTK6	0.450379	0.169188	2.662	0.0077678	0.317783	0	3.76693	0.287757	2.1278	-0.264962	1.88252	2.30764	0.658678	-0.0897983	0.837168	0.477628	0.0958263	0.11486	0.197763	0.0428395
5232	PGK2	0.484461	0.181729	2.66584	0.00767962	0.317783	34.0076	6.0613	0.108666	2.13724	3.95154	0.642277	0.875008	0.519555	0.889154	0.29085	0.169773	0.0590959	0.0506316	0.205065	0.0376457
79979	TRMT2B	0.369397	0.13891	2.65926	0.00783135	0.318342	0	3.21049	0.360296	0.178029	2.69538	1.13775	1.5004	0.0459355	0.687262	0.473478	0.335963	0.0665753	0.0650137	0.173183	0.0501384
55255	WDR41	-0.420416	0.158199	-2.65752	0.0078718	0.319177	0	2.13792	0.544279	-0.226123	-2.24913	-1.48859	-1.3692	-0.0821327	-0.774784	-0.537557	-0.339323	0.131929	0.118668	0.130407	0.0614171
55160	ARHGEF10L	-0.372004	0.140131	-2.65469	0.00793806	0.319437	0	3.65719	0.30094	-0.436448	-3.09658	-0.802065	-1.44515	-0.100108	-0.713034	-0.31061	-0.330212	0.0526102	0.0530221	0.149972	0.0522111
83987	CCDC8	0.401329	0.151146	2.65524	0.00792527	0.319437	0	1.97444	0.577728	1.91468	1.95005	0.0252028	1.24715	0.587866	0.626285	0.0102006	0.29928	0.0942678	0.103146	0.163815	0.057586
23710	GABARAPL1	0.387088	0.145721	2.65637	0.00789871	0.319437	0	0.764134	0.858025	1.87248	1.65606	0.509202	1.14561	0.497924	0.514597	0.188965	0.292565	0.0707116	0.0965567	0.137716	0.0652181
83605	CCM2	0.452971	0.170931	2.65002	0.00804861	0.320663	0.656401	4.02643	0.258624	1.27508	-0.23077	1.07331	3.67289	0.378557	-0.0890445	0.388026	0.74189	0.0881427	0.148886	0.130699	0.0408002
114904	C1QTNF6	0.342219	0.129095	2.65091	0.00802756	0.320663	0	0.606558	0.894929	1.74244	0.909147	0.402642	1.89976	0.445433	0.238039	0.156669	0.391809	0.0653505	0.0685531	0.1514	0.0425353
7031	TFF1	0.364188	0.137342	2.65169	0.00800901	0.320663	0	2.83819	0.417252	0.874317	2.68168	-0.293458	1.35192	0.24282	0.678392	-0.149751	0.297986	0.0771314	0.0639952	0.260404	0.0485836
338645	LUZP2	0.465716	0.175729	2.6502	0.00804448	0.320663	0	3.31049	0.346185	1.55789	1.34764	-0.587081	2.65079	0.59313	0.449483	-0.268403	0.662851	0.144952	0.111244	0.209015	0.0625289
11009	IL24	0.330897	0.124981	2.64757	0.00810737	0.322202	0	2.03596	0.564976	0.029863	1.36061	1.10186	2.44526	0.00805867	0.361708	0.340811	0.482495	0.0728214	0.0706719	0.0956686	0.0389345
23362	PSD3	-0.303403	0.114768	-2.64363	0.00820223	0.324255	0	2.76843	0.428723	-0.619039	-0.328171	-0.915581	-2.90311	-0.143775	-0.0782901	-0.330396	-0.51214	0.0539425	0.0569133	0.13022	0.0311209
79611	ACSS3	-0.406677	0.153848	-2.64337	0.00820843	0.324255	0	2.29301	0.513862	-1.52816	-1.85985	-1.85059	-0.247876	-0.464379	-0.50413	-0.773055	-0.071321	0.0923438	0.0734731	0.174503	0.0827876
8447	DOC2B	-0.415321	0.157145	-2.64291	0.00821975	0.324255	0	2.24599	0.522946	-0.86853	-0.367478	-0.0956048	-2.88659	-0.281853	-0.129675	-0.0563535	-0.644013	0.105311	0.124523	0.347441	0.0497757
84174	SLA2	0.388421	0.147224	2.6383	0.00833226	0.32675	0	2.72013	0.436816	1.33644	0.517147	-0.0706524	2.76084	0.393725	0.178053	-0.0265781	0.631518	0.0867934	0.118541	0.141513	0.0523224
10458	BAIAP2	0.433294	0.164273	2.63764	0.00834847	0.32675	13.4983	4.62419	0.201477	0.619091	3.41258	0.662713	1.85258	0.155312	0.899181	0.257128	0.381202	0.0629364	0.069427	0.150538	0.0423405
717	C2	0.584646	0.221681	2.63733	0.00835608	0.32675	32.7698	5.94971	0.114083	2.8621	1.02825	2.90189	0.675787	0.901915	0.360782	1.0629	0.165653	0.0993028	0.12311	0.134159	0.0600865
22927	HABP4	0.404311	0.153323	2.63699	0.00836461	0.32675	0	1.95856	0.581053	0.850318	0.661883	0.357103	2.76109	0.275583	0.241084	0.132887	0.646155	0.105037	0.132671	0.138478	0.0547663
51160	VPS28	0.37716	0.143109	2.63548	0.00840196	0.327411	0	3.77074	0.287308	0.559623	2.51312	0.204848	2.48655	0.158161	0.626964	0.0545941	0.569514	0.0798748	0.0622385	0.0710277	0.0524585
23074	UHRF1BP1L	0.416647	0.158205	2.63359	0.00844875	0.32764	0	3.43845	0.328833	1.6788	0.129711	2.51051	1.55388	0.545227	0.0518416	0.974519	0.297071	0.105476	0.159736	0.15068	0.0365499
5783	PTPN13	0.418452	0.15886	2.6341	0.00843614	0.32764	12.2887	4.56042	0.206964	3.39276	0.957275	1.01361	1.29742	0.849885	0.230023	0.496664	0.236974	0.0627499	0.0577392	0.240096	0.033361
775	CACNA1C	0.328178	0.124671	2.63235	0.00847973	0.328047	0	2.53551	0.468907	-0.140325	1.1193	1.03372	2.66902	-0.0395573	0.332922	0.302461	0.497601	0.0794664	0.0884696	0.0856111	0.0347583
1173	AP2M1	0.354989	0.134927	2.63098	0.00851391	0.328575	0	0.275904	0.964495	0.945136	1.62514	1.30988	1.39564	0.252826	0.402686	0.460807	0.342679	0.0715576	0.0613976	0.123758	0.0602879
50674	NEUROG3	0.370694	0.141015	2.62876	0.00856964	0.329931	0	0.735864	0.864738	1.8545	0.885305	1.03553	1.53329	0.528692	0.223274	0.515482	0.35914	0.0812737	0.063605	0.247799	0.0548631
117156	SCGB3A2	0.413809	0.157805	2.62228	0.00873424	0.331936	0	0.904711	0.824291	1.09406	0.759117	0.639365	2.36624	0.323217	0.244897	0.350469	0.595994	0.0872782	0.104076	0.300469	0.0634408
51073	MRPL4	0.509817	0.194451	2.62182	0.00874606	0.331936	37.6918	6.41971	0.0928835	0.449066	2.0166	0.775124	4.67401	0.127951	0.547297	0.258242	0.917471	0.0811836	0.0736557	0.110997	0.0385306
1757	SARDH	-0.374948	0.1429	-2.62384	0.00869443	0.331936	0	2.19092	0.533738	0.00818796	-0.447157	-1.27946	-2.69043	0.00304075	-0.175149	-0.349059	-0.576677	0.137914	0.153425	0.0744295	0.0459431
23621	BACE1	-0.323199	0.123118	-2.62512	0.00866181	0.331936	0	1.28556	0.732564	-1.3377	-2.21671	-0.671323	-1.01139	-0.328962	-0.551584	-0.245393	-0.199111	0.0604753	0.0619162	0.133617	0.0387577
9126	SMC3	0.40555	0.154651	2.62236	0.00873224	0.331936	0	1.95432	0.581941	0.735674	0.615489	2.62485	1.01057	0.263984	0.232433	0.724712	0.270911	0.128761	0.142612	0.0762296	0.0718655
144501	KRT80	0.452962	0.172847	2.6206	0.00877754	0.332343	16.8227	4.80901	0.186329	2.16357	1.34982	-0.721568	3.42648	0.519787	0.335934	-0.355056	0.757061	0.0577176	0.061938	0.242124	0.0488165
22820	COPG1	0.402829	0.153782	2.61948	0.00880647	0.332652	0	3.54733	0.314675	1.45324	2.95354	0.987118	0.273679	0.372446	0.737279	0.459591	0.0694929	0.0656823	0.062313	0.216773	0.0644758
84254	CAMKK1	-0.342218	0.130766	-2.61702	0.00887009	0.334267	0	1.91213	0.590843	-0.961144	-0.608362	-0.334407	-2.71205	-0.249269	-0.171538	-0.125095	-0.554881	0.0672604	0.0795051	0.139937	0.0418605
1198	CLK3	0.357209	0.136635	2.61432	0.00894043	0.336127	0	1.59836	0.659761	2.33947	0.560417	1.22594	1.06909	0.588775	0.156291	0.444819	0.256865	0.0633382	0.0777762	0.131651	0.0577277
83694	RPS6KL1	0.438748	0.167942	2.61249	0.00898851	0.336399	0	3.40949	0.332692	1.30623	0.808867	-0.688587	3.14428	0.463247	0.269772	-0.389443	0.647409	0.125772	0.111234	0.319867	0.0423951
4829	NMBR	-0.478815	0.183282	-2.61245	0.00898968	0.336399	19.4623	4.96662	0.174258	-1.35435	-2.97961	-2.13528	-0.570139	-0.356487	-0.756017	-1.03728	-0.13107	0.0692827	0.0643787	0.235985	0.0528499
27255	CNTN6	-0.498254	0.190826	-2.61104	0.00902674	0.336998	21.1279	5.0715	0.166636	-1.9318	-0.220183	-2.83656	-2.16432	-0.550371	-0.0664168	-1.27022	-0.450613	0.0811682	0.0909884	0.200526	0.0433477
8290	HIST3H3	-0.372344	0.142819	-2.60709	0.0091314	0.339324	0	2.63504	0.451379	-0.80568	-0.321651	-1.78022	-2.34739	-0.210358	-0.096132	-0.721038	-0.568231	0.0681698	0.0893234	0.164047	0.0585977
51224	ELOA2	-0.4839	0.185592	-2.60733	0.00912515	0.339324	21.3572	5.08629	0.165586	-0.936808	-2.31266	0.00817872	-3.40861	-0.216507	-0.557989	0.00403589	-0.930567	0.0534124	0.058214	0.243505	0.0745316
222698	NKAPL	0.415331	0.159582	2.60261	0.00925164	0.342996	16.1372	4.76969	0.189459	0.899341	3.42716	-0.101549	2.15574	0.218873	0.792149	-0.0381228	0.450058	0.0592292	0.0534251	0.140934	0.0435857
3550	IK	0.539819	0.207558	2.60081	0.00930035	0.344006	59.2985	9.82765	0.0200895	2.90923	-0.16943	4.17879	2.53736	0.563776	-0.0410156	1.0326	0.60689	0.0375541	0.0586026	0.0610605	0.0572077
55681	SCYL2	-0.349331	0.134402	-2.59916	0.00934532	0.344873	0	1.659	0.646087	-2.12571	-1.84613	0.0280957	-0.697841	-0.458302	-0.494313	0.0120062	-0.183758	0.0464829	0.0716938	0.182613	0.0693392
10436		0.329316	0.126794	2.59726	0.00939712	0.345987	0	0.561926	0.90509	1.14128	0.994885	1.05288	1.97657	0.252522	0.259443	0.336496	0.475477	0.0489574	0.0680045	0.102142	0.0578678
134728	IRAK1BP1	-0.348946	0.134411	-2.59611	0.00942862	0.346351	0	1.06323	0.785958	-1.65615	-1.24329	0.238711	-1.85941	-0.458674	-0.313978	0.121937	-0.389397	0.076702	0.0637753	0.26093	0.0438567
56945	MRPS22	-0.313442	0.120888	-2.59283	0.00951896	0.347351	0	2.44967	0.484456	-1.99016	-2.01169	0.27624	-1.04331	-0.391341	-0.475477	0.0808384	-0.289493	0.0386666	0.0558646	0.0856372	0.0769925
407	ARR3	0.370376	0.142811	2.59348	0.00950113	0.347351	0	0.353894	0.949593	1.56879	1.24339	0.244073	1.73589	0.384527	0.320655	0.132921	0.464282	0.0600791	0.0665063	0.296583	0.0715351
389206	BEND4	0.382553	0.147546	2.59276	0.00952093	0.347351	0	3.51046	0.319407	2.84788	0.882111	0.189283	1.69795	0.890016	0.273202	0.0818303	0.292824	0.0976678	0.0959228	0.186898	0.0297416
10846	PDE10A	-0.311829	0.120464	-2.58856	0.00963782	0.350817	0	2.8736	0.411527	-1.43446	-2.4458	0.457753	-1.15112	-0.340982	-0.53038	0.165792	-0.243631	0.0565046	0.0470253	0.131179	0.0447945
9159	PCSK7	0.393766	0.152267	2.58602	0.00970905	0.35187	0	1.51487	0.678842	2.01011	1.09301	0.105383	1.71933	0.530682	0.328137	0.038003	0.543734	0.0696996	0.0901281	0.130045	0.100013
1741	DLG3	0.28488	0.110164	2.58596	0.00971069	0.35187	0	1.90451	0.592461	1.14981	1.99567	1.67446	0.69507	0.252623	0.391737	0.647947	0.128958	0.0482714	0.038531	0.149737	0.0344222
220108	FAM124A	0.426833	0.165141	2.58466	0.00974757	0.352409	15.2264	4.71845	0.193613	1.47124	2.82551	-0.166111	2.31597	0.359504	0.750678	-0.0478331	0.598468	0.0597088	0.0705851	0.0829197	0.0667757
8618	CADPS	-0.426154	0.164995	-2.58284	0.00979921	0.353478	39.1986	6.5788	0.0866062	-1.81708	-3.53125	-2.05567	-0.27091	-0.38907	-0.742892	-0.610621	-0.0511291	0.0458468	0.0442582	0.0882341	0.0356194
8022	LHX3	0.303354	0.117563	2.58035	0.00986994	0.355152	0	3.50231	0.320462	3.20395	0.661003	0.288872	1.03177	0.574179	0.129626	0.11223	0.212489	0.0321162	0.0384573	0.15094	0.0424136
200558	APLF	0.38672	0.149912	2.57965	0.00988996	0.355152	0	0.585602	0.899721	0.735678	1.12606	1.17483	2.01265	0.224205	0.330958	0.526011	0.485786	0.0928785	0.0863819	0.200465	0.0582578
51078	THAP4	-0.375222	0.145534	-2.57824	0.00993046	0.355808	0	2.97457	0.395563	-2.20985	0.19774	-0.39166	-2.13212	-0.697216	0.0747401	-0.143694	-0.447122	0.0995423	0.142863	0.134605	0.0439772
119587	CPXM2	-0.361667	0.14038	-2.57635	0.00998505	0.356439	0	2.53631	0.468765	-1.27881	-0.308739	0.0693313	-2.72734	-0.370763	-0.0949315	0.0303631	-0.567985	0.0840582	0.0945446	0.191793	0.0433706
29934	SNX12	-0.443947	0.172334	-2.57609	0.00999259	0.356439	0	2.447	0.484946	-0.718975	-1.3459	0.087412	-2.59754	-0.27044	-0.482424	0.0373343	-0.711237	0.141486	0.12848	0.18242	0.0749729
147968	CAPN12	-0.431211	0.16752	-2.57409	0.0100503	0.357702	0	1.24257	0.742813	-0.447355	-0.545318	-0.833314	-2.58392	-0.174979	-0.236825	-0.345624	-0.609326	0.152991	0.188606	0.172024	0.0556087
23510	KCTD2	0.361842	0.140787	2.57013	0.010166	0.361015	0	2.43348	0.487432	1.96094	1.1861	-0.0806949	1.94434	0.498729	0.355156	-0.023897	0.551356	0.064685	0.0896594	0.0876987	0.0804119
3043	HBB	0.344519	0.134198	2.56725	0.0102507	0.363221	0.288615	4.01158	0.260217	1.12844	2.35475	2.49259	0.0386117	0.204622	0.467758	0.741422	0.0114871	0.0328811	0.0394597	0.0884768	0.088508
9397	NMT2	-0.391075	0.15247	-2.56493	0.0103195	0.364851	0	0.545072	0.908883	-0.994434	-0.383209	-0.95911	-2.25129	-0.370079	-0.154758	-0.34216	-0.482098	0.138496	0.163093	0.127268	0.045857
23064	SETX	-0.389808	0.152077	-2.56323	0.0103704	0.365037	0	1.23337	0.745013	-1.83403	-0.665192	-0.615054	-1.90239	-0.555325	-0.200001	-0.210506	-0.533138	0.0916814	0.0904003	0.117139	0.0785386
94097	SFXN5	0.409487	0.159709	2.56395	0.0103487	0.365037	0	1.68441	0.640406	0.0574153	1.43148	1.72122	1.80089	0.0198686	0.469479	0.592187	0.497394	0.119751	0.107562	0.11837	0.0762826
55007	FAM118A	0.558717	0.218137	2.56131	0.0104279	0.366259	0	1.07012	0.784291	0.235627	0.967334	0.76502	2.46047	0.129553	0.549817	0.401485	0.742488	0.302306	0.32306	0.275418	0.0910634
8453	CUL2	-0.459934	0.18013	-2.55335	0.0106692	0.369866	30.4374	5.75021	0.124416	-3.79078	-1.87499	0.532992	-1.88814	-0.810372	-0.471754	0.195233	-0.457712	0.0456994	0.0633041	0.134173	0.0587644
2029	ENSA	0.386898	0.151473	2.55424	0.010642	0.369866	0	3.82359	0.281154	1.25078	0.129673	3.07589	1.17366	0.31015	0.0444718	0.805325	0.284696	0.0614867	0.117617	0.0685488	0.0588409
11148	HHLA2	0.336467	0.131723	2.55435	0.0106387	0.369866	0	1.93957	0.585043	2.1294	1.04428	1.58072	0.5837	0.54019	0.268007	0.572376	0.132916	0.0643543	0.0658649	0.131115	0.0518534
6519	SLC3A1	-0.361692	0.141621	-2.55395	0.010651	0.369866	0	1.49458	0.683523	-0.955542	-0.489799	-0.933648	-2.44797	-0.274029	-0.136302	-0.398701	-0.557173	0.0822418	0.0774409	0.18236	0.0518045
84197	POMK	-0.427232	0.167177	-2.55557	0.0106014	0.369866	0	2.59015	0.459219	-1.03875	0.232509	-1.41775	-2.445	-0.351142	0.091326	-0.658153	-0.613022	0.114273	0.154281	0.215503	0.0628631
1388	ATF6B	-0.390055	0.152716	-2.55411	0.0106458	0.369866	0	0.925024	0.819385	-1.37302	-0.454027	-1.76093	-1.50211	-0.436134	-0.144892	-0.570342	-0.407097	0.1009	0.101841	0.104903	0.0734498
6500	SKP1	-0.268471	0.105185	-2.55237	0.0106994	0.37011	0	0.870539	0.832531	-2.14096	-1.28694	-0.593022	-0.890786	-0.415479	-0.240133	-0.191926	-0.176189	0.03766	0.0348164	0.104744	0.0391211
622	BDH1	0.518693	0.203417	2.5499	0.0107754	0.371138	51.6003	8.26451	0.0408499	2.26537	4.4939	0.704923	1.07093	0.555447	0.980087	0.291288	0.188854	0.0601183	0.0475645	0.17075	0.0310976
83942	TSSK1B	-0.545911	0.214038	-2.55053	0.0107559	0.371138	30.7672	5.77761	0.122946	-3.85056	-0.653943	-0.446484	-2.13482	-1.09983	-0.189217	-0.210701	-0.528754	0.0815832	0.0837219	0.2227	0.0613457
6374	CXCL5	-0.426801	0.16749	-2.54821	0.0108277	0.372137	0	0.993706	0.802775	-1.69641	-0.839593	-0.301427	-1.95282	-0.748117	-0.409597	-0.131165	-0.425916	0.194481	0.238	0.189353	0.047569
6707	SPRR3	-0.40492	0.158955	-2.54738	0.0108536	0.37223	0	3.51248	0.319147	-0.65329	-1.27977	-2.66455	-1.32468	-0.184627	-0.409382	-1.06104	-0.303659	0.0798693	0.102328	0.158569	0.0525476
23245	ASTN2	0.288663	0.113539	2.54241	0.0110091	0.375953	0	2.69789	0.440586	0.939636	0.399929	0.857124	2.71739	0.204679	0.0821011	0.341124	0.528315	0.0474489	0.0421436	0.158394	0.037799
55345	ZGRF1	0.618807	0.243367	2.54269	0.0110004	0.375953	60.3707	10.0935	0.0177875	3.81283	-0.101871	2.67346	2.86538	0.902299	-0.0237813	1.01088	0.703162	0.0560023	0.054497	0.142974	0.0602208
5709	PSMD3	0.402436	0.158526	2.5386	0.0111296	0.379258	0	0.867331	0.833304	1.93243	1.21891	0.857184	1.16493	0.696646	0.385411	0.305989	0.308621	0.129962	0.0999779	0.127427	0.0701866
160851	DGKH	0.328871	0.129761	2.53443	0.0112629	0.382987	0	1.6262	0.653465	0.263048	1.28403	1.64156	1.90707	0.071347	0.380575	0.654868	0.35957	0.0735667	0.0878483	0.159145	0.0355495
84678	KDM2B	0.462652	0.182664	2.5328	0.0113154	0.383482	40.688	6.744	0.0805209	2.95665	2.70778	2.08165	-0.129145	0.677735	0.616158	0.65626	-0.028193	0.0525435	0.0517797	0.0993881	0.0476572
23092	ARHGAP26	0.414972	0.163907	2.53176	0.0113493	0.383482	0	0.925883	0.819178	0.87836	1.54099	1.84439	0.887543	0.290637	0.484466	0.680925	0.272163	0.109486	0.0988385	0.136299	0.0940331
9340	GLP2R	-0.35507	0.140236	-2.53194	0.0113433	0.383482	0	1.61992	0.654881	-0.627028	-1.65049	-1.79929	-1.29457	-0.165675	-0.431139	-0.797208	-0.316075	0.0698134	0.0682352	0.19631	0.0596111
613	BCR	0.349458	0.138246	2.52781	0.0114778	0.385502	0	3.34147	0.341912	-0.290949	1.33688	1.33886	2.70354	-0.0799509	0.477621	0.394724	0.514134	0.0755113	0.127639	0.0869199	0.036165
118424	UBE2J2	0.277867	0.109929	2.5277	0.0114813	0.385502	0	2.12908	0.546052	2.26723	1.19733	-0.150131	1.38631	0.470089	0.249279	-0.0430909	0.281337	0.04299	0.0433452	0.0823815	0.0411845
9245	GCNT3	-0.381568	0.150955	-2.5277	0.0114813	0.385502	0	3.54331	0.315189	-1.93092	0.00390388	-0.623015	-2.73429	-0.511556	0.000994991	-0.312901	-0.607171	0.0701869	0.0649598	0.252241	0.0493098
4929	NR4A2	-0.405268	0.160569	-2.52394	0.0116047	0.38883	0	1.99264	0.573935	-1.02603	-0.004242	-0.263529	-2.69086	-0.497187	-0.00222878	-0.0924302	-0.563836	0.234813	0.276055	0.123019	0.043906
27072	VPS41	-0.431459	0.171101	-2.52166	0.0116801	0.388917	41.0539	6.78587	0.0790454	-0.640173	-4.07314	-1.55408	-1.34201	-0.15774	-0.911299	-0.408086	-0.250093	0.0607136	0.0500568	0.0689533	0.0347288
127733	UBXN10	-0.403597	0.159974	-2.52289	0.0116394	0.388917	0	1.99187	0.574095	-0.133833	-1.51479	-1.78403	-1.69162	-0.0442606	-0.55419	-0.731335	-0.416319	0.109372	0.133847	0.168046	0.0605683
5544	PRB3	-0.30159	0.119568	-2.52234	0.0116577	0.388917	0	1.31089	0.726549	-2.02468	-0.986322	-0.105294	-1.60929	-0.572395	-0.283441	-0.0493921	-0.252001	0.079924	0.0825825	0.220043	0.0245207
3483	IGFALS	-0.395105	0.156845	-2.51907	0.0117664	0.390976	0	1.84284	0.605657	-2.31792	-0.427275	-0.824598	-1.39761	-0.728374	-0.134902	-0.324719	-0.372967	0.0987444	0.0996832	0.155071	0.0712146
55561	CDC42BPG	0.382158	0.151894	2.51596	0.011871	0.391503	3.44705	4.1428	0.246451	0.291025	2.46332	0.254409	2.72483	0.0710794	0.546792	0.0918529	0.662712	0.0596522	0.0492721	0.130353	0.0591523
81789	TIGD6	-0.482257	0.191684	-2.51589	0.0118732	0.391503	10.1419	4.45146	0.216661	-1.57716	-1.66897	0.728745	-3.30954	-0.494267	-0.555213	0.333845	-0.739161	0.098214	0.110668	0.209865	0.049882
56886	UGGT1	-0.443264	0.176156	-2.51632	0.0118587	0.391503	2.79349	4.11495	0.249316	0.206498	-2.80065	-1.34139	-1.88218	0.0733737	-0.891783	-0.408444	-0.460632	0.126255	0.101391	0.092716	0.0598943
7083	TK1	0.457999	0.182088	2.51526	0.0118945	0.391503	0	0.726098	0.867049	0.969595	0.653866	0.880548	2.21576	0.409917	0.278222	0.327518	0.644652	0.178736	0.181053	0.138345	0.0846455
3654	IRAK1	-0.362009	0.143942	-2.51496	0.0119045	0.391503	0	1.65545	0.646882	-1.78983	-0.301446	-0.739305	-2.03459	-0.46255	-0.0843402	-0.284422	-0.548488	0.066787	0.0782797	0.148006	0.0726744
85364	ZCCHC3	0.44667	0.17774	2.51305	0.0119691	0.392822	11.5465	4.52215	0.210323	0.372364	0.65758	2.93943	2.20042	0.107987	0.191673	0.860643	0.624908	0.0841026	0.0849623	0.0857273	0.080653
8701	DNAH11	-0.397103	0.158284	-2.5088	0.0121143	0.396775	9.96908	4.44292	0.217439	-1.73114	-1.72886	0.754037	-2.98149	-0.405163	-0.391194	0.31679	-0.687718	0.0547767	0.0511992	0.176505	0.0532053
3776	KCNK2	-0.249222	0.0994456	-2.50611	0.0122067	0.398014	0	2.89402	0.408256	-1.46219	-0.0968809	-1.30411	-2.30793	-0.2473	-0.0179731	-0.555781	-0.410578	0.028605	0.0344166	0.181625	0.0316481
9569	GTF2IRD1	-0.328084	0.130944	-2.50553	0.0122267	0.398014	0	2.71041	0.438461	-0.612754	-1.61948	-2.07809	-1.29286	-0.152734	-0.403	-1.06073	-0.274151	0.0621296	0.0619244	0.260547	0.0449651
165324	UBXN2A	-0.366284	0.146186	-2.50561	0.0122242	0.398014	0	1.68717	0.639789	-0.840385	-1.33694	-2.17486	-0.861141	-0.260683	-0.413702	-0.718834	-0.210073	0.0962209	0.0957532	0.109243	0.0595104
153020	RASGEF1B	0.491397	0.196211	2.50443	0.0122649	0.398447	31.6985	5.85638	0.11881	0.519901	3.91286	0.765637	1.85024	0.126389	0.943846	0.371413	0.452034	0.0590988	0.0581853	0.235325	0.0596876
1431	CS	0.371932	0.148722	2.50086	0.0123893	0.400864	0.748233	4.03015	0.258226	0.921614	0.407277	3.30352	1.02031	0.229578	0.123895	0.760028	0.258783	0.0620529	0.0925397	0.0529305	0.0643293
23463	ICMT	0.441235	0.176392	2.50145	0.0123687	0.400864	13.1574	4.60603	0.203025	0.0835235	1.18477	2.75756	2.22003	0.023084	0.328287	0.843632	0.624062	0.0763844	0.0767784	0.0935959	0.0790201
3200	HOXA3	0.353209	0.141289	2.4999	0.0124228	0.401136	4.53716	4.19011	0.241654	0.974378	3.12435	-0.407398	1.8168	0.219811	0.680201	-0.1682	0.34426	0.0508915	0.0473974	0.170456	0.0359052
85480	TSLP	0.331843	0.13285	2.49787	0.0124941	0.402626	0	0.557847	0.906011	1.07588	0.795316	1.23606	1.8653	0.272658	0.218487	0.56387	0.388655	0.0642257	0.0754693	0.208104	0.0434142
5077	PAX3	0.628305	0.251768	2.49557	0.0125753	0.40443	74.7405	15.8356	0.00122545	2.63796	5.15827	-1.28834	6.59078	0.536171	0.979013	-0.534637	1.08098	0.0413116	0.0360221	0.17221	0.0269003
55277	FGGY	0.35508	0.14235	2.49441	0.0126166	0.404943	0	1.01894	0.796669	0.715408	0.992305	0.603139	2.31965	0.192962	0.301293	0.258715	0.52771	0.0727501	0.0921909	0.183996	0.0517542
60385	TSKS	-0.405025	0.162676	-2.48977	0.0127827	0.406113	0	0.652004	0.884431	-1.58367	-0.519012	-1.23817	-1.59389	-0.498252	-0.183396	-0.607951	-0.404476	0.0989852	0.124861	0.241086	0.0643974
10574	CCT7	0.298312	0.119845	2.48914	0.0128051	0.406113	0	2.65339	0.448207	1.51588	0.301795	0.117556	2.53898	0.299859	0.0823163	0.0378906	0.554045	0.0391297	0.0743958	0.10389	0.0476178
79712	GTDC1	-0.311869	0.125222	-2.49053	0.0127554	0.406113	0	1.25581	0.739653	-1.08293	-1.851	-0.143908	-1.6849	-0.286144	-0.493574	-0.0440868	-0.338805	0.0698186	0.0711036	0.0938526	0.0404343
58158	NEUROD4	0.448917	0.180099	2.49261	0.0126806	0.406113	11.1228	4.50059	0.212237	3.16247	1.90335	-0.0906233	0.949588	0.848681	0.554504	-0.0447745	0.21074	0.0720172	0.084873	0.244108	0.0492522
596	BCL2	0.461227	0.185264	2.48956	0.01279	0.406113	31.1606	5.81063	0.121196	3.83998	0.267322	0.943584	1.98742	0.930278	0.0761199	0.389251	0.375601	0.0586904	0.0810825	0.170176	0.035717
10181	RBM5	0.294164	0.118169	2.48935	0.0127978	0.406113	0	1.89701	0.594056	1.55972	0.645305	2.21204	0.592941	0.305885	0.151183	0.599956	0.159616	0.0384612	0.054888	0.0735617	0.0724653
7225	TRPC6	-0.509011	0.204689	-2.48676	0.0128913	0.407461	27.4775	5.51553	0.137713	-3.50925	-0.649222	-1.16192	-1.5734	-1.12266	-0.194736	-0.513877	-0.324097	0.102345	0.0899719	0.195599	0.0424296
9846	GAB2	0.307567	0.123692	2.48656	0.0128985	0.407461	0	2.84361	0.416371	1.23742	2.09827	-0.241976	1.74186	0.302808	0.57457	-0.0674192	0.367679	0.0598827	0.0749833	0.0776286	0.0445563
11163	NUDT4	0.313297	0.126057	2.48536	0.012942	0.408031	0	2.06429	0.55917	2.20301	0.888568	-0.0526836	1.61112	0.581105	0.257936	-0.017461	0.30674	0.0695786	0.084264	0.109847	0.0362479
3781	KCNN2	-0.319998	0.128827	-2.48393	0.0129941	0.408868	0	0.221831	0.97399	-1.08148	-1.78368	-0.667337	-1.26305	-0.262809	-0.405633	-0.322109	-0.28463	0.0590537	0.0517171	0.232978	0.0507828
221935	SDK1	-0.317731	0.12813	-2.47976	0.013147	0.412867	0	0.542474	0.909466	-1.57031	-1.14475	0.0377675	-1.70703	-0.378039	-0.280626	0.019505	-0.353886	0.0579567	0.060094	0.266721	0.042978
115350	FCRL1	0.356153	0.143703	2.4784	0.0131973	0.413636	0	1.44094	0.695968	1.83365	0.503708	0.162788	1.98517	0.544789	0.166753	0.062293	0.431737	0.0882722	0.109595	0.146431	0.0472978
10861	SLC26A1	-0.408299	0.164802	-2.47751	0.0132301	0.413855	36.6221	6.31135	0.0974067	-3.33343	-1.52681	-2.19408	-0.386348	-0.632472	-0.323975	-0.899345	-0.0705912	0.0359997	0.0450249	0.168015	0.0333844
2243	FGA	0.261968	0.105843	2.47505	0.0133217	0.414291	0	1.62426	0.653901	2.28802	0.568827	0.45615	1.40836	0.455294	0.113847	0.145675	0.260453	0.0395973	0.0400571	0.101989	0.0342003
7414	VCL	-0.318032	0.12849	-2.47515	0.0133182	0.414291	0	2.26225	0.519791	-0.476319	-1.40511	-2.09125	-1.34687	-0.107189	-0.417322	-0.688281	-0.299265	0.0506411	0.0882113	0.108322	0.0493695
4921	DDR2	0.285424	0.115279	2.47595	0.0132882	0.414291	0	3.01647	0.389092	1.69235	2.39881	0.742533	0.114198	0.339087	0.558304	0.2386	0.0239892	0.0401459	0.0541688	0.103255	0.0441282
23028	KDM1A	0.30842	0.124657	2.47415	0.0133555	0.414539	0	0.770403	0.856532	1.36043	1.65494	1.36303	0.666582	0.29971	0.356954	0.562794	0.164663	0.0485343	0.0465219	0.170485	0.0610218
60677	CELF6	-0.378648	0.153142	-2.47253	0.0134161	0.414819	0	0.283941	0.96302	-0.813633	-0.979422	-0.778692	-2.04199	-0.285654	-0.348863	-0.286675	-0.465214	0.12326	0.126874	0.135535	0.051904
4250	SCGB2A2	0.350111	0.141601	2.47252	0.0134163	0.414819	0	0.611513	0.893792	1.55789	1.24043	0.117955	1.65689	0.418499	0.340145	0.0499517	0.400198	0.0721636	0.0751939	0.179338	0.0583395
144097	SPINDOC	-0.556951	0.225329	-2.47172	0.0134464	0.414946	40.2663	6.69639	0.0822308	-1.44539	-1.84169	-3.77579	-0.313374	-0.41378	-0.582342	-1.17537	-0.0921485	0.0819543	0.0999821	0.0969017	0.086467
55011	PIH1D1	0.355705	0.144001	2.47015	0.0135056	0.415175	0	3.25607	0.353803	0.695211	2.40883	0.0195616	1.90945	0.184007	0.643359	0.0059827	0.521267	0.0700541	0.0713335	0.0935376	0.0745249
5042	PABPC3	-0.337323	0.136548	-2.47037	0.0134975	0.415175	0	0.339262	0.952483	-0.812858	-1.18076	-1.2197	-1.70275	-0.231518	-0.292163	-0.410524	-0.423769	0.0811222	0.061225	0.113284	0.0619379
2286	FKBP2	0.360283	0.145948	2.46857	0.0135653	0.41621	0	3.74528	0.290315	-0.328727	1.82776	1.26225	2.6775	-0.0885235	0.522736	0.45234	0.504242	0.0725181	0.0817948	0.128423	0.0354664
55705	IPO9	0.311178	0.126127	2.46717	0.0136184	0.41704	0	1.33496	0.72085	0.815304	1.99355	0.459119	1.60379	0.182769	0.520559	0.143801	0.376946	0.0502537	0.0681843	0.0981012	0.0552414
84873	ADGRG7	-0.37936	0.153826	-2.46616	0.0136569	0.417422	0	1.8723	0.599329	0.306551	-2.26226	-0.27626	-1.63283	0.153323	-0.56324	-0.146568	-0.378823	0.250155	0.0619869	0.281477	0.053826
221477	C6orf89	0.358751	0.145558	2.46466	0.0137144	0.418382	0	0.442772	0.931272	1.02007	0.695972	1.27464	1.83512	0.278301	0.265907	0.341854	0.508767	0.074433	0.145975	0.071929	0.0768618
55187	VPS13D	0.262468	0.106596	2.46228	0.0138059	0.419572	0	0.895656	0.826476	0.870695	1.59575	0.220174	1.8988	0.190043	0.309728	0.0634484	0.356109	0.0476399	0.0376731	0.0830443	0.0351729
9885	OSBPL2	0.394442	0.160183	2.46245	0.0137993	0.419572	0	2.95199	0.399086	1.33268	0.18842	2.5948	0.686388	0.475151	0.078649	0.78523	0.180582	0.127119	0.174233	0.0915772	0.0692163
9514	GAL3ST1	0.399073	0.162166	2.46089	0.0138594	0.420402	0	3.94616	0.267337	3.00956	0.358962	1.30356	1.07536	0.763521	0.0918277	0.581153	0.268404	0.0643629	0.0654411	0.198754	0.0622977
9045	RPL14	0.39025	0.158843	2.45683	0.014017	0.424379	0	1.86195	0.601548	1.29724	-0.357433	2.07846	1.32942	0.51965	-0.166919	0.536123	0.358042	0.160466	0.218084	0.0665339	0.0725347
7634	ZNF80	0.350825	0.14311	2.45144	0.0142286	0.426751	0	1.73776	0.628571	2.16396	0.700772	1.07329	1.19229	0.701335	0.220346	0.496418	0.240792	0.105039	0.098868	0.213925	0.0407868
94233	OPN4	0.331969	0.135384	2.45206	0.0142039	0.426751	0	3.60827	0.306988	1.7801	-0.135586	0.634262	2.80807	0.392058	-0.0341863	0.239499	0.569299	0.0485078	0.0635735	0.142583	0.0411021
84628	NTNG2	0.410535	0.167334	2.45339	0.0141518	0.426751	0	1.65805	0.6463	0.340443	1.73737	0.782944	1.98238	0.124522	0.728316	0.255161	0.547021	0.133783	0.175734	0.10621	0.076144
10682	EBP	0.38557	0.157168	2.45324	0.0141578	0.426751	0	2.59442	0.458468	0.721817	0.0872228	2.26314	1.72115	0.219474	0.0305548	0.719672	0.50473	0.0924514	0.122716	0.101122	0.0859963
4710	NDUFB4	0.392016	0.159844	2.45249	0.014187	0.426751	26.1997	5.42003	0.1435	2.21129	0.531441	2.82057	1.24597	0.556109	0.110446	0.932468	0.241217	0.0632452	0.0431906	0.109294	0.03748
10725	NFAT5	-0.729608	0.297951	-2.44875	0.0143352	0.427604	66.0974	11.7985	0.00810626	0.157633	-2.68868	-4.82735	-2.52548	0.059288	-0.88091	-1.52136	-0.531743	0.141461	0.107346	0.0993222	0.0443319
146540	ZNF785	-0.389653	0.159174	-2.44797	0.0143665	0.427604	0	2.31603	0.509456	-0.468659	0.322944	-1.39674	-2.45637	-0.186462	0.141633	-0.519648	-0.539531	0.158294	0.192343	0.138416	0.0482442
140689	CBLN4	-0.380104	0.155248	-2.44837	0.0143505	0.427604	0	1.86078	0.601799	-0.162684	-1.18148	-0.549931	-2.47598	-0.0511338	-0.413714	-0.259569	-0.572198	0.0987936	0.122617	0.222786	0.0534067
121391	KRT74	0.479832	0.196061	2.44736	0.0143905	0.427604	32.1212	5.89286	0.116941	3.13238	3.01282	0.172786	0.519192	0.810628	0.749466	0.0713746	0.126092	0.0669723	0.0618808	0.170635	0.0589816
5428	POLG	0.430621	0.175825	2.44915	0.0143195	0.427604	25.2443	5.35076	0.147842	3.33047	0.0807919	2.4811	0.71461	0.679674	0.0239299	0.760908	0.188223	0.0416475	0.0877299	0.0940536	0.0693755
3135	HLA-G	0.443275	0.181368	2.44406	0.0145232	0.429843	0	0.850581	0.837334	0.490249	1.39203	0.848821	1.98126	0.175546	0.560827	0.40253	0.572096	0.128219	0.162315	0.224887	0.0833785
4176	MCM7	0.327109	0.134111	2.4391	0.0147238	0.429843	0	0.604301	0.895447	1.50802	0.284198	0.852841	1.86314	0.445371	0.109422	0.246314	0.369676	0.0872227	0.14824	0.0834145	0.0393689
163882	CNST	-0.383272	0.156848	-2.44358	0.0145422	0.429843	0	0.69741	0.873813	-0.723802	-1.39619	-1.74656	-1.06995	-0.236823	-0.425252	-0.603828	-0.306816	0.107055	0.092769	0.119525	0.0822292
4824	NKX3-1	0.457289	0.187337	2.44099	0.0146469	0.429843	0	1.67937	0.641529	0.0490539	-0.101254	1.47054	2.33723	0.0293882	-0.0574457	0.568908	0.585783	0.358921	0.321876	0.149667	0.0628159
79085	SLC25A23	0.331884	0.136065	2.43916	0.0147213	0.429843	0	1.42249	0.700272	2.40051	0.927031	0.498402	0.708358	0.552014	0.234305	0.197709	0.195751	0.0528803	0.0638816	0.15736	0.0763665
51046	ST8SIA3	-0.338302	0.138647	-2.44002	0.0146865	0.429843	0	0.231155	0.97241	-0.950068	-0.887756	-1.36119	-1.6252	-0.300348	-0.264666	-0.476242	-0.341904	0.09994	0.0888809	0.12241	0.0442586
84553	FAXC	0.346896	0.142031	2.44239	0.0145905	0.429843	0	3.45168	0.327083	1.71172	2.19821	1.51413	0.154139	0.436292	0.585167	0.578334	0.0328872	0.0649668	0.0708633	0.145892	0.0455227
90050	FAM181A	-0.315375	0.129313	-2.43885	0.0147343	0.429843	0	2.34732	0.503517	-2.00005	-0.183802	-0.816131	-1.89611	-0.507953	-0.041032	-0.412321	-0.420687	0.0645011	0.0498364	0.255242	0.0492253
388115	CCDC9B	0.362626	0.148515	2.44169	0.0146189	0.429843	0	0.0294678	0.998666	1.21996	1.37756	0.930537	1.31886	0.364754	0.391731	0.315941	0.364247	0.0893934	0.0808636	0.115277	0.0762766
6560	SLC12A4	0.3411	0.139851	2.43902	0.014727	0.429843	0	2.70565	0.439268	-0.38795	1.59664	1.48135	1.93916	-0.124021	0.501049	0.389973	0.473665	0.102197	0.098479	0.0693037	0.0596645
57461	ISY1	0.329714	0.135265	2.43753	0.0147878	0.430081	0	2.30199	0.51214	0.47034	-0.361171	2.23442	1.70272	0.148975	-0.163999	0.545156	0.354752	0.100324	0.206185	0.0595266	0.0434071
56914	OTOR	-0.308823	0.126705	-2.43733	0.0147961	0.430081	0	2.7754	0.427565	-1.65122	-2.38698	-0.383584	-0.380335	-0.454796	-0.540352	-0.189536	-0.0753214	0.0758616	0.0512456	0.244152	0.0392198
988	CDC5L	-0.334823	0.137537	-2.43441	0.014916	0.43027	0	2.36369	0.50043	-2.03606	-1.09766	-1.71452	-0.00859105	-0.579793	-0.34767	-0.416802	-0.00232591	0.0810897	0.100322	0.0590982	0.0732985
11237	RNF24	0.414171	0.170167	2.4339	0.0149369	0.43027	0	3.29112	0.34888	-0.197151	1.31277	2.39607	1.53455	-0.0642166	0.417776	0.691443	0.590985	0.106095	0.101277	0.0832749	0.148317
149643	SPATA45	0.572264	0.235086	2.43427	0.0149219	0.43027	37.4185	6.39167	0.0940341	0.205912	3.51659	0.454548	2.99364	0.0614325	0.977933	0.224478	0.835095	0.0890091	0.077335	0.243885	0.0778165
26168	SENP3	0.391027	0.160519	2.43602	0.0148499	0.43027	0	2.97859	0.394937	-0.0467711	0.657658	1.5524	2.46336	-0.0151284	0.245454	0.515538	0.683056	0.104623	0.139296	0.110285	0.0768878
150696	PROM2	-0.419507	0.172316	-2.43452	0.0149115	0.43027	20.6689	5.04216	0.168736	-3.42252	-0.581505	-0.372037	-1.88631	-0.865464	-0.139196	-0.139448	-0.436036	0.0639448	0.0572986	0.140493	0.0534342
409	ARRB2	0.326882	0.134487	2.43058	0.0150746	0.432692	0	1.73565	0.629038	0.624998	2.05477	0.327592	1.70978	0.162505	0.571134	0.106371	0.402228	0.0676046	0.077259	0.105433	0.0553432
80144	FRAS1	-0.326413	0.134331	-2.42992	0.0151021	0.432692	0	1.92852	0.587375	-0.25225	-1.05371	-2.09976	-1.50003	-0.0670355	-0.297185	-0.605616	-0.367447	0.0706229	0.0795439	0.083187	0.060005
25809	TTLL1	-0.362904	0.149312	-2.43051	0.0150774	0.432692	0	2.15033	0.541798	-0.865466	-1.44478	0.304146	-2.26468	-0.272821	-0.505221	0.119878	-0.504176	0.09937	0.122281	0.15535	0.0495621
91860	CALML4	0.357979	0.147477	2.42735	0.0152094	0.43499	22.812	5.18216	0.158935	2.61556	-0.107186	0.844362	3.03054	0.521435	-0.022932	0.282676	0.574576	0.0397439	0.0457731	0.112078	0.0359465
84219	WDR24	0.419133	0.172771	2.42594	0.0152688	0.43591	0	3.13195	0.371726	1.25901	2.49499	-0.157923	1.21536	0.450807	0.834398	-0.0612165	0.355846	0.128209	0.111843	0.15026	0.0857264
7857	SCG2	-0.325252	0.134201	-2.42363	0.0153663	0.436359	0	2.6072	0.456229	-0.334454	-2.47159	-1.01756	-1.10686	-0.0769334	-0.600734	-0.499799	-0.280657	0.0529123	0.0590762	0.24125	0.0642929
8193	DPF1	-0.379152	0.156376	-2.42461	0.0153247	0.436359	0	2.36545	0.500098	-1.91967	-0.461187	-0.199036	-2.07528	-0.60486	-0.141744	-0.0719491	-0.585053	0.099279	0.0944614	0.130674	0.0794765
8747	ADAM21	0.36926	0.152349	2.42378	0.01536	0.436359	0	2.05538	0.560991	0.711017	1.40458	-0.246758	2.32181	0.217606	0.455951	-0.109781	0.549301	0.0936661	0.105377	0.197931	0.0559714
54566	EPB41L4B	0.340564	0.140643	2.42148	0.0154576	0.438176	0	3.24187	0.355816	0.707901	2.27461	-0.216022	2.01063	0.192862	0.692585	-0.07412	0.42214	0.0742244	0.0927111	0.117726	0.0440806
10786	SLC17A3	-0.368837	0.152535	-2.41804	0.0156042	0.440771	0	0.776591	0.855058	-0.975935	-1.46014	-1.48724	-1.15203	-0.316943	-0.459047	-0.686224	-0.266527	0.105468	0.0988377	0.212897	0.0535246
5165	PDK3	0.284984	0.117844	2.41832	0.0155924	0.440771	0	1.83548	0.607246	0.69452	0.250712	2.17304	1.55448	0.169771	0.0742686	0.552265	0.291718	0.0597524	0.0877526	0.0645892	0.0352172
255488	RNF144B	0.503734	0.208489	2.41612	0.015687	0.440841	21.9702	5.12625	0.162783	1.99993	0.261275	3.07844	1.07295	0.574322	0.0918268	1.17905	0.293005	0.0824675	0.123522	0.146691	0.0745745
5878	RAB5C	0.414707	0.171616	2.41648	0.0156712	0.440841	13.5622	4.6276	0.201187	0.585639	1.007	3.34183	1.06561	0.154858	0.290181	0.910084	0.299923	0.0699207	0.0830385	0.0741641	0.0792178
55257	MRGBP	0.297752	0.123238	2.41606	0.0156893	0.440841	0	0.611236	0.893855	1.90833	1.09027	0.72261	1.0469	0.449297	0.26333	0.285175	0.212639	0.0554317	0.0583354	0.155745	0.0412546
347902	AMIGO2	0.388128	0.160695	2.41531	0.0157218	0.440981	0	3.38341	0.336201	0.525304	0.121533	0.936447	3.0827	0.165153	0.0406534	0.382808	0.688684	0.0988439	0.111893	0.167107	0.0499088
170689	ADAMTS15	-0.33892	0.140504	-2.41217	0.0158578	0.442073	0	0.821711	0.844267	-1.86892	-0.638462	-0.373852	-1.61245	-0.51348	-0.181181	-0.181793	-0.353889	0.0754857	0.0805293	0.236459	0.0481682
23186	RCOR1	-0.372479	0.154416	-2.41219	0.0158571	0.442073	0	0.861117	0.8348	-1.99166	-0.951879	-1.02289	-0.872173	-0.568664	-0.268234	-0.480042	-0.246305	0.0815234	0.0794081	0.220241	0.0797518
5571	PRKAG1	0.366381	0.151908	2.41187	0.0158711	0.442073	0	3.3356	0.342718	0.894289	0.432544	2.8233	0.926634	0.232399	0.16157	0.835999	0.237326	0.0675324	0.139528	0.087679	0.0655957
8689	KRT36	0.376871	0.156154	2.41346	0.0158017	0.442073	0	2.82797	0.418916	2.05506	1.32347	-0.617365	1.51552	0.602553	0.404171	-0.267848	0.414887	0.0859691	0.0932611	0.188232	0.0749437
9401	RECQL4	0.410948	0.170533	2.40978	0.015962	0.442295	0	0.611883	0.893707	0.730537	0.600705	1.43794	1.85923	0.26484	0.240344	0.582005	0.489503	0.131426	0.160082	0.163821	0.0693178
84838	ZNF496	0.343675	0.14261	2.4099	0.015957	0.442295	0	3.08744	0.37834	0.30808	0.360958	2.57576	1.49272	0.0866673	0.114153	0.69323	0.396204	0.0791378	0.100013	0.0724341	0.0704502
57547	ZNF624	-0.360148	0.149393	-2.41074	0.0159202	0.442295	0	2.29653	0.513186	-2.3514	-1.191	-0.16575	-1.0645	-0.758836	-0.419081	-0.0852513	-0.220306	0.104146	0.123814	0.264543	0.0428309
6975	TECTB	0.498018	0.206751	2.40879	0.0160057	0.442742	37.3793	6.38767	0.0941995	4.0462	1.83858	-0.157108	1.33601	1.00965	0.45553	-0.0621699	0.364564	0.0622659	0.0613857	0.15659	0.0744612
64236	PDLIM2	-0.28005	0.116364	-2.40667	0.0160989	0.444282	0	2.32163	0.50839	-1.38461	-0.902949	-2.13616	-0.904456	-0.301136	-0.198266	-0.80148	-0.181378	0.0473011	0.0482138	0.140773	0.0402157
126326	GIPC3	-0.330101	0.13722	-2.40563	0.0161446	0.444282	0	3.38238	0.33634	-1.06809	-2.01401	-2.15462	-0.143854	-0.246739	-0.465201	-0.785033	-0.0363468	0.053365	0.0533527	0.13275	0.0638393
23090	ZNF423	-0.56553	0.23503	-2.4062	0.0161193	0.444282	61.4229	10.3689	0.0156775	-0.702016	-1.09935	-2.45641	-5.02623	-0.15183	-0.270761	-1.15754	-0.916326	0.0467757	0.0606597	0.222059	0.0332364
399	RHOH	0.348648	0.145442	2.39716	0.0165228	0.453816	0	3.32434	0.344269	1.79599	-0.00355622	2.44815	0.724194	0.49688	-0.00103769	0.651056	0.197366	0.0765416	0.0851444	0.0707231	0.0742737
131578	LRRC15	0.400738	0.167211	2.39661	0.0165477	0.453816	0	2.54602	0.467032	1.18133	2.38147	1.00709	0.456733	0.413153	0.831848	0.411413	0.124758	0.122316	0.122011	0.166887	0.0746125
30820	KCNIP1	-0.315368	0.131731	-2.39402	0.0166648	0.455465	13.311	4.6142	0.202328	-3.14654	-0.084023	-0.121034	-2.34519	-0.55879	-0.0166444	-0.0570191	-0.386223	0.0315378	0.0392411	0.221936	0.0271219
221662	RBM24	0.320783	0.133975	2.39435	0.0166497	0.455465	0	3.16838	0.366385	0.245189	1.25253	-0.316965	2.79424	0.0674572	0.284894	-0.173542	0.568428	0.0756928	0.0517359	0.29977	0.041383
114788	CSMD3	0.437903	0.183216	2.39009	0.0168441	0.457314	48.8185	7.81532	0.0499867	1.37923	4.75	0.602125	1.17323	0.270388	0.877554	0.274498	0.221091	0.0384331	0.0341319	0.207828	0.0355118
10046	MAMLD1	0.384089	0.16086	2.38772	0.0169531	0.457314	0	1.34964	0.717382	0.504899	1.36717	1.45863	1.67307	0.147304	0.40366	0.798011	0.481268	0.0851181	0.0871739	0.299313	0.0827455
93986	FOXP2	0.29504	0.123553	2.38797	0.0169419	0.457314	0	3.67936	0.298233	2.80752	1.05253	1.13644	0.444054	0.630431	0.235464	0.324962	0.0811308	0.0504232	0.0500472	0.0817651	0.0333811
9465	AKAP7	-0.367567	0.153862	-2.38894	0.0168973	0.457314	17.454	4.84578	0.183444	-0.228916	-3.06167	-0.356409	-2.46784	-0.0547024	-0.787675	-0.131234	-0.407129	0.0571033	0.0661878	0.13558	0.0272164
83733	SLC25A18	-0.39581	0.16555	-2.39087	0.0168085	0.457314	19.2121	4.95124	0.175403	-2.75139	-0.531289	0.0365016	-2.78217	-0.624561	-0.125086	0.0130104	-0.673626	0.0515283	0.0554316	0.127045	0.0586236
165545	DQX1	-0.427587	0.178959	-2.3893	0.0168804	0.457314	0	3.49638	0.321232	-1.57253	-0.268467	-0.00228893	-2.85136	-0.462865	-0.0858043	-0.00126175	-0.796531	0.0866384	0.10215	0.303867	0.0780374
4142	MAS1	0.397443	0.166379	2.38877	0.0169047	0.457314	0	1.30184	0.728696	1.90867	1.69224	0.119687	0.697913	0.612339	0.483848	0.0622611	0.215574	0.102926	0.0817516	0.270608	0.0954094
11056	DDX52	-0.325135	0.136179	-2.38756	0.0169608	0.457314	0	2.42109	0.48972	-1.62888	-1.70505	0.139856	-1.59421	-0.471852	-0.527069	0.0390342	-0.368615	0.0839137	0.0955568	0.0778979	0.053463
151963	MB21D2	0.336941	0.141286	2.38482	0.0170876	0.459692	0	0.567983	0.903721	0.958368	0.976399	0.197098	2.08439	0.269909	0.319923	0.0892821	0.431814	0.0793177	0.107359	0.205194	0.0429178
1583	CYP11A1	-0.350796	0.147159	-2.3838	0.0171351	0.459692	0	2.45543	0.483401	0.317032	-1.71128	-0.81272	-2.10912	0.104379	-0.52394	-0.388916	-0.450515	0.108398	0.0937392	0.228997	0.0456262
59345	GNB4	-0.391015	0.164003	-2.3842	0.0171165	0.459692	0	1.92658	0.587784	-1.72957	0.131748	-0.785651	-1.99624	-0.717872	0.0593558	-0.25771	-0.481986	0.172274	0.202972	0.107598	0.0582969
7322	UBE2D2	0.388619	0.163431	2.37788	0.0174126	0.464336	22.5338	5.16354	0.160206	1.11607	-0.326419	2.10195	3.2774	0.293983	-0.0960384	0.491329	0.706545	0.0693851	0.0865643	0.054639	0.0464752
9537	TP53I11	0.371693	0.156369	2.37702	0.0174532	0.464336	0	1.43862	0.696508	0.164422	1.46096	1.44588	1.6843	0.0513454	0.532369	0.480814	0.449039	0.0975177	0.132786	0.110584	0.0710773
4585	MUC4	0.277348	0.11667	2.37721	0.0174443	0.464336	0	1.3733	0.711805	0.806274	2.164	0.772893	1.04598	0.18778	0.527638	0.214358	0.208328	0.0542418	0.0594507	0.0769205	0.0396688
9785	DHX38	0.364483	0.1533	2.37758	0.0174267	0.464336	0	1.51555	0.678685	0.577885	0.693969	1.69153	1.86859	0.166248	0.219524	0.657944	0.501818	0.0827617	0.100065	0.151294	0.0721212
3853	KRT6A	0.395924	0.166474	2.37829	0.0173932	0.464336	0	3.33617	0.342641	2.69225	1.44779	0.732944	-0.0453198	0.682029	0.479239	0.350083	-0.0131462	0.0641763	0.109571	0.228139	0.0841442
3849	KRT2	0.386734	0.162744	2.37634	0.0174855	0.464425	0	1.17852	0.758161	1.65088	0.891549	1.59582	0.870948	0.566323	0.338667	0.648056	0.215959	0.117678	0.144296	0.164913	0.0614834
202559	KHDRBS2	0.501267	0.21101	2.37556	0.0175221	0.464566	26.2492	5.42367	0.143276	2.15569	3.56942	-0.164337	0.693604	0.57714	0.968662	-0.087452	0.194383	0.0716789	0.0736462	0.283185	0.0785404
23023	TMCC1	0.321574	0.135458	2.37397	0.0175977	0.464566	0	2.53472	0.469049	0.263851	1.19549	0.110264	2.5806	0.0907541	0.402029	0.0311222	0.519754	0.118308	0.113089	0.0796658	0.0405652
4247	MGAT2	0.330675	0.13927	2.37435	0.0175798	0.464566	0	1.80986	0.612792	0.17485	0.939314	1.58744	2.00363	0.047744	0.284062	0.538615	0.465532	0.0745605	0.0914546	0.115123	0.0539836
8048	CSRP3	-0.293898	0.12381	-2.37378	0.0176069	0.464566	0	2.14683	0.542497	-1.75803	-0.071991	-1.30231	-1.72911	-0.421752	-0.016303	-0.398516	-0.411203	0.0575523	0.0512836	0.0936404	0.0565545
6837	MED22	0.348697	0.147002	2.37206	0.0176893	0.465207	0	2.28948	0.514539	1.74856	1.88364	0.256781	1.11564	0.516738	0.733751	0.0740985	0.276958	0.0873333	0.151741	0.0832707	0.0616282
4493	MT1E	-0.364623	0.153691	-2.37243	0.0176713	0.465207	0	0.537216	0.910642	-1.46676	-1.07889	-0.41927	-1.63539	-0.552367	-0.384953	-0.160385	-0.360359	0.14182	0.12731	0.146333	0.0485546
51560	RAB6B	0.423887	0.178994	2.36817	0.0178763	0.466298	0	2.40915	0.491934	0.679235	1.05086	2.42034	0.770511	0.261954	0.379154	0.96764	0.237213	0.148734	0.130179	0.159837	0.0947802
871	SERPINH1	0.437245	0.184505	2.36982	0.0177965	0.466298	0	1.14539	0.76613	1.3482	1.27825	-0.206814	1.80752	0.465928	0.481499	-0.115178	0.551783	0.119433	0.141893	0.310158	0.0931907
203054	ADCK5	0.362572	0.152998	2.36978	0.0177988	0.466298	0	2.70149	0.439973	0.60567	2.45657	-0.222364	1.36613	0.172299	0.667469	-0.104624	0.389528	0.0809265	0.0738251	0.22138	0.0813002
375323	LHFPL4	-0.414028	0.17475	-2.36927	0.0178234	0.466298	0	3.68488	0.297564	-0.14285	-0.445415	-1.10284	-3.30583	-0.0477526	-0.148028	-0.591423	-0.693034	0.111746	0.110447	0.287586	0.0439489
440279	UNC13C	-0.318596	0.134528	-2.36825	0.0178725	0.466298	0	3.7868	0.285425	-1.6914	-2.73804	-0.168305	-0.68534	-0.40625	-0.65042	-0.0662119	-0.11965	0.0576895	0.0564298	0.154768	0.0304797
51129	ANGPTL4	0.343523	0.145185	2.36611	0.017976	0.467377	0	2.91494	0.404927	1.10373	1.60063	-0.724382	2.05145	0.324133	0.529732	-0.305361	0.446719	0.0862423	0.109529	0.177702	0.0474184
160728	SLC5A8	-0.422276	0.178438	-2.36652	0.0179561	0.467377	0	1.83733	0.606846	-0.923223	0.0562279	-2.11771	-1.44829	-0.390306	0.0259411	-0.75784	-0.397049	0.17873	0.212849	0.128062	0.0751586
5992	RFX4	0.259191	0.109965	2.35703	0.0184219	0.467478	0	1.03377	0.793081	1.0164	1.96857	0.0640461	1.29496	0.22505	0.409178	0.0221745	0.233292	0.0490265	0.043204	0.119873	0.0324555
8897	MTMR3	0.294824	0.125003	2.35854	0.0183471	0.467478	0	1.09663	0.777887	2.02564	1.07992	0.476847	1.0782	0.47218	0.353203	0.128045	0.227932	0.0543364	0.106972	0.0721057	0.0446904
79874	RABEP2	-0.330467	0.140213	-2.3569	0.0184284	0.467478	0	3.2629	0.352839	-1.22988	-0.37216	-2.41432	-1.31298	-0.298751	-0.0923777	-0.897431	-0.334909	0.0590055	0.0616135	0.13817	0.065063
140831	ZSWIM3	-0.300252	0.12705	-2.36327	0.0181147	0.467478	0	1.29536	0.730236	-1.17514	-0.756209	-0.100999	-2.21752	-0.281022	-0.191224	-0.0390759	-0.471214	0.0571876	0.0639439	0.149688	0.0451547
6836	SURF4	0.311406	0.131718	2.36419	0.0180695	0.467478	0	2.66827	0.445646	0.537562	1.1696	2.5238	0.480798	0.121056	0.364627	0.62493	0.142898	0.0507127	0.0971904	0.0613131	0.0883337
374470	C12orf42	-0.355786	0.151054	-2.35536	0.0185047	0.467478	0	3.85478	0.277579	0.016981	-1.46819	-1.14671	-2.80843	0.00411415	-0.348624	-0.550058	-0.628209	0.0586993	0.0563834	0.230097	0.0500359
25861	WHRN	-0.335593	0.142227	-2.35956	0.0182968	0.467478	0	1.31973	0.724454	-0.0234145	-1.06226	-0.763696	-2.27487	-0.00775776	-0.329757	-0.361352	-0.450654	0.109775	0.0963654	0.223883	0.0392438
116984	ARAP2	-0.366802	0.155466	-2.35937	0.018306	0.467478	0	1.0361	0.792518	-1.89554	-1.05695	-0.279676	-1.34696	-0.557121	-0.382432	-0.0964387	-0.363257	0.086384	0.13092	0.118903	0.0727306
9373	PLAA	0.381079	0.16147	2.36006	0.0182719	0.467478	0	3.97011	0.26471	0.389586	0.160049	2.61024	2.25693	0.129304	0.0488794	0.85326	0.452623	0.110158	0.0932704	0.106857	0.0402193
140699	MROH8	0.299171	0.126847	2.35852	0.0183477	0.467478	0	1.39177	0.707466	0.663182	2.22244	0.169146	1.24368	0.156009	0.50919	0.0886007	0.268939	0.0553397	0.0524926	0.274379	0.0467619
7415	VCP	0.371272	0.157208	2.36166	0.0181932	0.467478	22.7087	5.17523	0.159407	0.550347	0.247821	2.80778	2.58976	0.155914	0.0536144	0.635089	0.620321	0.0802592	0.0468046	0.0511614	0.057374
283254	HARBI1	-0.314114	0.133227	-2.35775	0.0183863	0.467478	0	2.90954	0.405783	0.201946	-0.676302	-0.16636	-2.81827	0.0722792	-0.239624	-0.0557179	-0.500924	0.128102	0.12554	0.112173	0.031592
493911	PHOSPHO2	0.475646	0.201943	2.35535	0.0185053	0.467478	36.9231	6.34146	0.096129	1.07329	0.950168	1.0208	3.972	0.229631	0.226511	0.637635	0.943384	0.0457749	0.0568299	0.390182	0.0564103
54469	ZFAND6	0.348126	0.147738	2.35637	0.0184546	0.467478	0	2.12886	0.546097	0.864364	-0.321022	1.75489	1.93688	0.266349	-0.128244	0.42524	0.559426	0.094953	0.15959	0.0587177	0.0834216
25927	CNRIP1	0.389977	0.165361	2.35834	0.0183571	0.467478	0	3.09091	0.377821	0.78645	-0.0920144	0.364671	2.87743	0.27249	-0.0356404	0.160715	0.678784	0.120049	0.150029	0.194227	0.0556485
80157	CWH43	0.380242	0.161186	2.35903	0.0183228	0.467478	0	3.32808	0.343753	0.494554	0.294282	0.566387	3.07469	0.158361	0.0949058	0.246537	0.700777	0.102534	0.104006	0.189469	0.0519465
84836	ABHD14B	0.384652	0.163274	2.35586	0.0184797	0.467478	0	0.916195	0.821518	0.625366	1.11538	0.690257	2.08679	0.211437	0.404304	0.242386	0.577812	0.114313	0.131393	0.123309	0.0766685
7319	UBE2A	0.302493	0.127979	2.36362	0.0180975	0.467478	0	1.83846	0.606602	1.55465	0.10603	0.832527	2.07458	0.35414	0.029673	0.22856	0.52278	0.05189	0.0783195	0.0753711	0.0635007
10211	FLOT1	0.362636	0.1541	2.35326	0.0186097	0.468916	0	1.36625	0.713465	1.8319	1.25875	1.39426	0.140727	0.505056	0.377382	0.48707	0.0453356	0.0760106	0.0898842	0.122039	0.103782
343641	TGM6	-0.348711	0.148233	-2.35245	0.0186501	0.468916	0	2.78821	0.425445	-2.57475	-0.62804	0.248332	-1.11211	-0.676452	-0.191805	0.125739	-0.274609	0.0690245	0.0932705	0.256376	0.0609724
10523	CHERP	0.340029	0.144508	2.35302	0.0186218	0.468916	0	3.39069	0.335218	-0.343086	2.19817	0.956556	2.00114	-0.100008	0.59299	0.315418	0.446527	0.0849702	0.0727732	0.108731	0.04979
10902	BRD8	-0.302995	0.128869	-2.35118	0.0187139	0.469784	0	0.981899	0.805632	-0.520699	-1.78533	-1.13436	-1.3284	-0.120998	-0.417481	-0.436476	-0.325521	0.0539985	0.0546812	0.148052	0.0600481
3827	KNG1	0.422829	0.179904	2.3503	0.0187583	0.470161	21.8272	5.11687	0.163437	0.949152	2.76396	-0.366689	2.70979	0.264343	0.735803	-0.123642	0.635494	0.0775645	0.0708694	0.113694	0.0549987
79744	ZNF419	0.327813	0.139598	2.34827	0.0188608	0.471992	0	2.04097	0.563947	2.52766	0.217474	0.792225	0.700982	0.561096	0.0698982	0.296538	0.185997	0.0492762	0.103304	0.140108	0.070404
5803	PTPRZ1	0.341084	0.145443	2.34513	0.0190205	0.472735	0	0.789785	0.851909	0.976651	1.80388	0.27498	1.41632	0.273974	0.588925	0.149069	0.303477	0.078694	0.106587	0.293881	0.0459124
51112	TRAPPC12	0.352837	0.150452	2.34517	0.0190183	0.472735	0	3.53215	0.316616	0.693822	1.03679	2.71731	0.922984	0.166902	0.267201	0.907593	0.274735	0.0578665	0.0664197	0.111559	0.0886013
79823	CAMKMT	0.368957	0.157199	2.34707	0.0189219	0.472735	0	3.47917	0.323473	1.1709	2.45232	-0.521871	1.59078	0.333334	0.675235	-0.199973	0.408806	0.0810441	0.0758148	0.146831	0.066041
79652	TMEM204	0.371442	0.15838	2.34525	0.0190142	0.472735	0	2.63411	0.45154	1.0276	0.3262	0.308039	2.62242	0.348128	0.110171	0.108697	0.692159	0.114771	0.114069	0.124514	0.069664
10231	RCAN2	0.350974	0.14972	2.34421	0.0190676	0.472735	0	2.70024	0.440187	1.89888	0.415285	-0.473659	2.04768	0.516762	0.130196	-0.227391	0.502652	0.0740605	0.0982891	0.230471	0.0602577
9204	ZMYM6	0.387445	0.165256	2.34451	0.019052	0.472735	8.02319	4.34892	0.226168	2.88598	1.29181	1.20374	0.429175	0.817284	0.397893	0.393025	0.0888342	0.0801973	0.0948711	0.106604	0.0428441
26007	TKFC	-0.359201	0.153369	-2.34207	0.0191773	0.473426	0	2.97784	0.395055	-0.131931	-0.2815	-2.30603	-1.74604	-0.0472792	-0.089754	-0.731888	-0.451396	0.128425	0.10166	0.10073	0.0668353
387755	INSC	0.366197	0.156365	2.34193	0.0191842	0.473426	0	1.79526	0.615967	0.637436	0.063285	0.344569	2.59824	0.229369	0.0228957	0.22228	0.540208	0.129478	0.13089	0.416146	0.0432279
6443	SGCB	0.40125	0.171307	2.34229	0.0191656	0.473426	12.6609	4.57985	0.205277	1.63838	-0.263389	2.38698	2.16915	0.483821	-0.0736056	0.834977	0.460674	0.087205	0.0780953	0.122363	0.0451032
51162	EGFL7	0.586793	0.25068	2.3408	0.0192425	0.474135	46.4175	7.46512	0.0584615	0.701481	4.18826	-0.143873	2.85166	0.21852	1.21847	-0.0799178	0.632772	0.0970395	0.0846375	0.308552	0.0492379
9786	KIAA0586	-0.319113	0.136435	-2.33894	0.0193384	0.475766	0	2.35505	0.502056	-2.49001	-1.0345	-0.424128	-0.612762	-0.652502	-0.270072	-0.13704	-0.1587	0.0686689	0.0681559	0.1044	0.0670769
81790	RNF170	-0.376647	0.161088	-2.33814	0.01938	0.476058	0	2.03143	0.565909	-1.85401	-0.950189	-0.116535	-1.77328	-0.683874	-0.345541	-0.036536	-0.483493	0.136059	0.132245	0.0982951	0.0743404
26084	ARHGEF26	0.429007	0.183611	2.3365	0.0194653	0.476692	10.0696	4.44789	0.216986	0.297639	2.18513	0.0826953	3.07533	0.102753	0.757818	0.0272975	0.668734	0.119181	0.120275	0.108964	0.0472852
2984	GUCY2C	-0.479143	0.205034	-2.3369	0.0194443	0.476692	25.4957	5.36882	0.146699	-0.506858	-0.412777	-2.06561	-3.36278	-0.149007	-0.127977	-0.822948	-0.839746	0.0864254	0.0961248	0.158727	0.0623589
152877	FAM53A	-0.496771	0.212774	-2.33473	0.0195574	0.476772	33.5268	6.01746	0.110764	-1.624	-0.674411	-0.0516186	-4.59935	-0.535535	-0.216279	-0.0204851	-0.906221	0.108744	0.102844	0.157494	0.0388218
3167	HMX2	-0.427398	0.183067	-2.33466	0.0195613	0.476772	5.81351	4.24689	0.236009	0.483352	-1.54646	-2.15947	-2.29913	0.166134	-0.474469	-0.778816	-0.559847	0.118138	0.0941325	0.13007	0.0592942
79641	ROGDI	0.376063	0.161025	2.33544	0.0195207	0.476772	0	1.49976	0.682327	0.299694	2.05412	0.688848	1.47318	0.10203	0.640221	0.254005	0.420222	0.115904	0.0971421	0.135969	0.0813661
80775	TMEM177	-0.321166	0.137594	-2.33415	0.0195877	0.476772	0	2.49535	0.476133	-0.209041	-2.24659	-0.283264	-1.66509	-0.053959	-0.623714	-0.127984	-0.372893	0.0666291	0.0770767	0.204141	0.0501528
5575	PRKAR1B	0.431833	0.185851	2.32354	0.0201501	0.483378	0	2.35012	0.502987	2.02524	0.143786	0.146378	1.89875	0.804887	0.0729841	0.059497	0.533095	0.157948	0.257648	0.165212	0.078827
85407	NKD1	-0.31348	0.13477	-2.32603	0.0200167	0.483378	0	0.672064	0.879754	-0.501549	-1.59312	-0.747015	-1.65375	-0.152728	-0.487142	-0.238524	-0.339205	0.0927275	0.0935012	0.101955	0.0420709
10069	RWDD2B	0.436168	0.187733	2.32334	0.0201607	0.483378	18.5272	4.90962	0.178536	3.24289	1.12408	1.36348	0.285744	0.910703	0.267852	0.544358	0.0828113	0.0788659	0.0567799	0.159395	0.0839893
1962	EHHADH	-0.364493	0.157144	-2.31949	0.0203685	0.483378	0	3.32642	0.343982	0.0621013	-0.855923	-0.380274	-3.04605	0.0195102	-0.300261	-0.167992	-0.62523	0.0987016	0.123064	0.195156	0.0421313
83660	TLN2	0.494963	0.21294	2.32443	0.0201027	0.483378	0	3.94946	0.266973	-0.566419	1.42873	2.2619	2.07112	-0.248466	0.620219	0.856401	0.577442	0.192424	0.188448	0.143353	0.0777331
8549	LGR5	0.348163	0.149772	2.32462	0.0200921	0.483378	0	1.43778	0.696703	1.17989	0.141558	1.43315	1.83727	0.374844	0.0435008	0.569846	0.435994	0.10093	0.0944335	0.158099	0.0563138
51400	PPME1	0.43163	0.185982	2.32081	0.0202969	0.483378	0	0.716495	0.869318	1.30339	1.54005	1.24332	0.697323	0.52246	0.630527	0.469419	0.223827	0.160679	0.167624	0.142547	0.103028
6461	SHB	0.378636	0.163029	2.3225	0.020206	0.483378	0	3.65246	0.301521	2.73105	-0.0100967	0.392771	1.75986	0.764326	-0.00324862	0.154161	0.412294	0.0783243	0.103522	0.154053	0.0548855
26248	OR2K2	-0.478684	0.206018	-2.32351	0.0201518	0.483378	47.263	7.58481	0.0554189	-1.86133	-0.624036	-0.779899	-4.15299	-0.444324	-0.143699	-0.259813	-1.03903	0.0569842	0.0530258	0.11098	0.0625946
84859	LRCH3	0.327472	0.141163	2.31982	0.0203509	0.483378	0	2.49068	0.476977	0.781832	-0.684008	1.79312	1.89152	0.252424	-0.305298	0.436837	0.437165	0.10424	0.199217	0.0593502	0.0534159
23229	ARHGEF9	0.342095	0.147417	2.32059	0.0203089	0.483378	0	0.238733	0.971107	0.869693	1.17153	0.786408	1.69605	0.239748	0.36971	0.317348	0.415347	0.0759936	0.0995905	0.162846	0.0599714
5322	PLA2G5	-0.298251	0.128538	-2.32033	0.0203228	0.483378	0	1.63235	0.652077	-0.688903	-0.398069	-0.939189	-2.34546	-0.178078	-0.102255	-0.357029	-0.483984	0.0668197	0.0659865	0.144511	0.04258
7222	TRPC3	-0.32404	0.139701	-2.31953	0.0203663	0.483378	0	2.30546	0.511475	-1.01847	-2.41564	-0.0803048	-0.898129	-0.259779	-0.677701	-0.0356258	-0.21121	0.0650592	0.0787067	0.196809	0.0553035
7779	SLC30A1	0.353155	0.15192	2.32462	0.0200922	0.483378	0	1.90086	0.593236	0.1035	0.960138	1.84754	1.72011	0.034838	0.335562	0.764929	0.380079	0.113298	0.122146	0.171418	0.0488246
2821	GPI	0.532802	0.229713	2.31942	0.0203721	0.483378	45.2587	7.30709	0.0627278	0.14026	1.45791	1.53181	4.18416	0.0447512	0.431464	0.455379	1.1213	0.101798	0.0875846	0.0883762	0.0718165
222962	SLC29A4	-0.397524	0.171153	-2.32262	0.0201998	0.483378	9.35255	4.4127	0.220211	-0.468005	-0.986864	-0.138489	-3.84139	-0.146715	-0.286134	-0.0551673	-0.73052	0.0982766	0.084067	0.158683	0.0361649
26502	NARF	0.331942	0.142796	2.3246	0.0200936	0.483378	0	1.81655	0.61134	0.952109	2.09091	1.35619	0.320366	0.238898	0.661021	0.380351	0.0991531	0.0629584	0.0999448	0.0786553	0.0957902
79618	HMBOX1	0.480834	0.207528	2.31696	0.0205059	0.485444	31.4666	5.83657	0.119838	0.3219	2.32146	0.379602	3.59012	0.100632	0.844781	0.118699	0.802223	0.09773	0.132424	0.0977772	0.0499312
147179	WIPF2	0.287674	0.124196	2.31629	0.0205427	0.485444	0	0.688575	0.875888	1.38378	0.376572	1.66981	1.09946	0.427766	0.109451	0.346439	0.250283	0.0955604	0.0844786	0.0430445	0.0518203
7432	VIP	-0.297042	0.128248	-2.31615	0.0205501	0.485444	0	1.58102	0.6637	-1.84358	-0.281622	-0.793263	-1.68469	-0.494842	-0.0662774	-0.38219	-0.339972	0.0720457	0.0553859	0.232127	0.0407234
2301	FOXE3	0.300903	0.130031	2.31408	0.0206633	0.487398	0	2.82557	0.419308	0.788013	1.4595	2.20905	0.741297	0.195805	0.341093	0.95171	0.168957	0.0617419	0.0546181	0.185608	0.051948
491	ATP2B2	0.237453	0.102734	2.31133	0.0208144	0.489566	0	2.54491	0.46723	1.74653	0.183876	-0.0138876	2.19153	0.345656	0.0369064	-0.00433307	0.375167	0.0391685	0.0402861	0.0973501	0.0293058
3748	KCNC3	-0.366218	0.158447	-2.3113	0.0208163	0.489566	6.23396	4.26594	0.234143	-0.701917	-3.28899	-0.355168	-1.03679	-0.187095	-0.784062	-0.135711	-0.229464	0.0710479	0.0568298	0.146004	0.0489832
90121	TSR2	0.427004	0.184811	2.31049	0.0208609	0.489716	27.2861	5.50101	0.138578	2.46402	-0.136886	1.49382	2.56863	0.545539	-0.03168	0.613386	0.723881	0.0490189	0.0535613	0.168606	0.0794205
283078	MKX	-0.725115	0.313932	-2.30978	0.0209003	0.489716	79.0549	19.0976	0.00026099	-2.75057	-5.57298	-3.0748	0.150063	-0.611792	-1.24168	-1.18094	0.0322049	0.0494722	0.0496412	0.14751	0.0460575
7732	RNF112	0.378601	0.163969	2.30897	0.020945	0.489716	0	0.70661	0.871648	0.638555	0.941405	0.75347	2.04359	0.204085	0.331867	0.332188	0.54207	0.102147	0.124272	0.194373	0.0703596
151987	PPP4R2	0.340252	0.147354	2.30908	0.020939	0.489716	0	0.260989	0.96719	1.17638	0.659123	1.42921	1.31602	0.397932	0.246083	0.451532	0.29337	0.114426	0.139389	0.0998123	0.0496946
126308	MOB3A	0.332819	0.144236	2.30747	0.0210289	0.49091	0	1.49911	0.682476	0.561953	1.35482	2.00127	0.816759	0.156101	0.372516	0.648438	0.232359	0.077164	0.0756006	0.104985	0.0809341
9262	STK17B	0.34622	0.150077	2.30695	0.0210574	0.49091	0	2.40225	0.493217	0.767593	-0.0032353	2.29961	1.359	0.271686	-0.0011501	0.710648	0.320034	0.125277	0.126368	0.0954997	0.0554565
5018	OXA1L	0.283367	0.122869	2.30625	0.0210964	0.491105	0	3.03371	0.386457	2.13557	-0.3777	1.11256	1.57754	0.430749	-0.0958089	0.31364	0.416341	0.0406837	0.0643454	0.0794728	0.0696528
326340	ZAR1	0.431801	0.187347	2.30483	0.0211763	0.492249	31.4657	5.8365	0.119842	2.57152	0.163327	0.511639	3.19398	0.679548	0.0387951	0.1888	0.743296	0.0698328	0.056421	0.136169	0.0541576
2845	GPR22	-0.346421	0.150442	-2.30269	0.0212963	0.493605	0	3.32533	0.344132	-0.718574	-2.08977	0.50649	-2.10585	-0.208127	-0.660141	0.202372	-0.447512	0.0838911	0.0997871	0.159646	0.0451599
83416	FCRL5	0.572015	0.248364	2.30313	0.0212716	0.493605	48.4546	7.76016	0.0512375	0.800134	0.332933	3.57599	2.86368	0.263222	0.105108	1.44003	0.629025	0.108223	0.0996691	0.162164	0.0482487
7621	ZNF70	-0.352166	0.153106	-2.30015	0.0214398	0.49422	9.07801	4.39938	0.221443	-0.763417	-0.00583597	-2.21041	-2.73887	-0.190944	-0.00153935	-0.779259	-0.515322	0.0625588	0.0695741	0.124285	0.0354008
2517	FUCA1	-0.347224	0.151	-2.29949	0.0214771	0.49422	0	1.21573	0.749235	-1.95333	-0.832742	-0.0859278	-1.40963	-0.562576	-0.225735	-0.0398818	-0.382932	0.0829493	0.0734813	0.215418	0.073796
203523	ZNF449	0.331847	0.144313	2.2995	0.0214768	0.49422	0	1.41172	0.702789	0.867114	0.530907	1.62044	1.74351	0.237232	0.14845	0.685005	0.432243	0.0748506	0.0781847	0.178698	0.0614622
22900	CARD8	0.331174	0.143909	2.30127	0.0213765	0.49422	0	2.45429	0.483609	1.76096	0.580273	2.05341	0.309744	0.470245	0.15763	0.679333	0.0910429	0.07131	0.0737928	0.10945	0.0863946
3060	HCRT	-0.357211	0.1553	-2.30013	0.0214406	0.49422	0	2.95269	0.398977	0.200927	-0.199801	-1.11578	-2.63022	0.0745646	-0.0743528	-0.484504	-0.56493	0.137717	0.138485	0.188554	0.0461324
402381	SOHLH1	0.399151	0.173755	2.2972	0.0216075	0.494499	16.109	4.76809	0.189588	3.27677	1.51466	0.991127	0.0266546	0.753549	0.386664	0.416882	0.00676017	0.0528848	0.0651682	0.176917	0.0643239
242	ALOX12B	-0.317552	0.13824	-2.29711	0.0216127	0.494499	0	1.87152	0.599497	-0.179405	-1.09469	-1.8403	-1.5909	-0.0474476	-0.315078	-0.594454	-0.393137	0.0699452	0.0828422	0.104342	0.061066
23416	KCNH3	0.401252	0.174642	2.29757	0.0215862	0.494499	0	3.25726	0.353636	1.91964	1.88283	-0.626566	1.23157	0.613276	0.644141	-0.285547	0.344009	0.102064	0.117041	0.207694	0.0780231
339500	ZNF678	0.364032	0.158379	2.29849	0.0215341	0.494499	0.913699	4.03688	0.257509	1.95469	2.26018	1.51126	-0.317447	0.474201	0.549779	0.584978	-0.0830255	0.058853	0.0591685	0.14983	0.0684038
23584	VSIG2	-0.444305	0.193675	-2.29408	0.021786	0.49552	32.9934	5.96956	0.113101	-0.327932	-0.455385	-2.38011	-3.39948	-0.0898512	-0.129139	-0.787862	-0.760224	0.0750723	0.0804192	0.109574	0.0500102
57634	EP400	-0.323566	0.141082	-2.29345	0.0218218	0.49552	0	0.242554	0.970444	-1.64934	-0.902825	-0.894167	-1.08053	-0.414792	-0.238853	-0.334913	-0.299519	0.0632474	0.0699931	0.14029	0.0768376
79152	FA2H	-0.317938	0.13865	-2.29309	0.021843	0.49552	0	1.88939	0.595679	-1.73933	-0.155424	-1.31254	-1.54125	-0.448142	-0.0388883	-0.544664	-0.395659	0.0663846	0.062604	0.1722	0.0659017
139221	MUM1L1	-0.34298	0.149442	-2.29507	0.0217289	0.49552	0	2.43262	0.487592	-0.0610768	-1.63667	-0.492505	-2.18518	-0.0165986	-0.464008	-0.240711	-0.571701	0.0738566	0.0803762	0.238875	0.0684488
317781	DDX51	-0.472104	0.205724	-2.29485	0.0217419	0.49552	15.5917	4.73887	0.191948	-2.01135	0.609776	-2.05471	-2.24121	-0.677119	0.222253	-0.649284	-0.668277	0.113332	0.132848	0.0998545	0.0889095
122704	MRPL52	-0.368898	0.160805	-2.29407	0.0217865	0.49552	0	2.02238	0.567775	-0.243197	-0.201761	-1.71368	-2.06121	-0.08876	-0.0741102	-0.582731	-0.530346	0.133205	0.134922	0.115632	0.0662023
151651	EFHB	-0.440026	0.192138	-2.29016	0.022012	0.498648	26.3969	5.43455	0.142606	-1.10168	0.0780002	-1.95676	-3.25095	-0.316438	0.0216702	-0.696459	-0.7747	0.0825023	0.0771851	0.126682	0.0567867
554	AVPR2	0.359543	0.157069	2.28908	0.0220746	0.499356	0	0.37488	0.945381	1.61615	1.36648	0.474494	0.954161	0.471887	0.405989	0.219066	0.26686	0.0852535	0.0882719	0.213151	0.0782214
29775	CARD10	0.329461	0.143969	2.28841	0.0221135	0.499356	0	3.65887	0.300734	1.52115	1.75277	2.11417	-0.168425	0.390844	0.427524	0.657842	-0.0408798	0.0660183	0.059494	0.0968196	0.0589119
26658	OR7C2	0.341407	0.149231	2.28778	0.0221505	0.499356	0	3.00984	0.390111	0.516803	1.07341	-0.262663	2.60452	0.148963	0.315043	-0.116865	0.643522	0.0830822	0.0861399	0.197957	0.0610479
8536	CAMK1	0.415244	0.181529	2.28748	0.022168	0.499356	0	2.51429	0.472714	0.128769	2.44984	0.485114	1.22197	0.0443932	0.765595	0.252366	0.432083	0.118853	0.0976612	0.270629	0.12503
23038	WDTC1	0.340723	0.149009	2.2866	0.0222194	0.499812	0	0.942448	0.815174	0.791129	0.919455	0.450087	2.12064	0.246808	0.327233	0.14607	0.508774	0.0973252	0.126664	0.105324	0.0575593
13	AADAC	-0.337426	0.147637	-2.28551	0.0222832	0.500543	0	1.82175	0.610214	-0.913869	-0.798187	0.247583	-2.34771	-0.289611	-0.233119	0.115504	-0.530251	0.10043	0.0852992	0.217647	0.0510122
80326	WNT10A	-0.404887	0.177265	-2.28408	0.0223665	0.501011	0	3.75048	0.289699	-2.04285	0.00849945	-2.2974	-0.879736	-0.596851	0.00290155	-0.880136	-0.241569	0.0853608	0.116541	0.146766	0.0754008
128822	CST9	0.379254	0.166013	2.28448	0.0223431	0.501011	0	1.77818	0.619695	2.13941	0.788228	-0.319292	1.30258	0.619215	0.256622	-0.184928	0.377104	0.0837713	0.105995	0.335449	0.0838132
57165	GJC2	0.378981	0.166155	2.28089	0.0225552	0.50453	0	1.37485	0.71144	1.62069	-0.0672844	1.03352	1.69646	0.582475	-0.0271132	0.426597	0.418244	0.129169	0.162381	0.170373	0.0607816
8677	STX10	0.451486	0.198164	2.27835	0.022706	0.507196	27.1196	5.48845	0.139331	3.577	1.72953	-0.35297	1.19716	0.850359	0.498459	-0.124253	0.371221	0.0565155	0.083062	0.123918	0.096153
29070	CCDC113	-0.435539	0.191263	-2.27718	0.0227757	0.508045	5.41701	4.22909	0.237766	-1.03472	-1.06018	0.273512	-3.23925	-0.3095	-0.304577	0.144219	-0.876656	0.0894686	0.0825346	0.278029	0.0732436
79902	NUP85	0.286837	0.126132	2.2741	0.02296	0.509317	0	0.935294	0.816903	1.80829	0.403977	1.26492	1.0362	0.38479	0.099488	0.407816	0.2706	0.0452806	0.0606496	0.103946	0.0681971
9246	UBE2L6	0.279065	0.122692	2.27452	0.0229348	0.509317	0	2.53763	0.468529	1.63922	-0.13315	0.244203	2.22411	0.416049	-0.0441238	0.0633054	0.428661	0.0644188	0.109814	0.0672013	0.0371464
22865	SLITRK3	-0.328545	0.144456	-2.27436	0.0229446	0.509317	0	2.21527	0.528946	-2.3708	-1.06575	-0.220846	-0.76335	-0.700672	-0.286826	-0.123039	-0.173111	0.0873458	0.0724313	0.310388	0.0514286
388567	ZNF749	-0.504346	0.221639	-2.27553	0.0228742	0.509317	29.8903	5.70534	0.12686	-3.49055	-2.05425	-0.507172	-0.225991	-0.99887	-0.651685	-0.184328	-0.073517	0.0818897	0.10064	0.132091	0.105826
57630	SH3RF1	-0.365453	0.160912	-2.27114	0.0231383	0.511854	0	1.44268	0.695562	-0.869516	-2.14443	-0.271098	-1.08288	-0.290874	-0.694003	-0.134683	-0.269997	0.111906	0.104736	0.246816	0.0621668
11321	GPN1	0.286787	0.126272	2.27119	0.0231353	0.511854	0	1.41733	0.701477	1.20298	0.413182	1.76876	1.35249	0.261498	0.100452	0.563282	0.351857	0.0472517	0.0591065	0.101417	0.0676806
123920	CMTM3	0.268953	0.118451	2.27058	0.0231726	0.511907	0	1.64498	0.649236	0.264357	1.90397	0.389936	1.71856	0.0650261	0.481185	0.127257	0.315352	0.0605052	0.0638711	0.106506	0.0336713
7475	WNT6	-0.535867	0.236143	-2.26925	0.0232533	0.512277	50.738	8.11986	0.0435985	-1.30649	0.122384	-3.39885	-2.90693	-0.352818	0.0363721	-1.17605	-0.71689	0.0729268	0.0883258	0.119726	0.0608186
26188	OR1C1	-0.333184	0.146793	-2.26975	0.0232226	0.512277	0	2.52024	0.471644	-0.363234	-0.386921	-1.34098	-2.36477	-0.110493	-0.106604	-0.536544	-0.587885	0.0925329	0.07591	0.160092	0.0618025
926	CD8B	0.332951	0.146841	2.26743	0.0233641	0.512623	0	1.33507	0.720824	1.43775	-0.152667	0.182605	2.08627	0.426543	-0.0615445	0.111511	0.407736	0.0880156	0.162513	0.372917	0.0381959
161424	NOP9	-0.333794	0.147214	-2.26741	0.0233651	0.512623	0	2.14517	0.542829	-1.98663	-0.231137	-1.70835	-0.606416	-0.563242	-0.068876	-0.528887	-0.175006	0.0803814	0.0887965	0.0958455	0.0832851
5223	PGAM1	0.47375	0.208853	2.26834	0.0233086	0.512623	22.9097	5.18872	0.158488	1.43851	-0.386522	3.54128	1.2463	0.393725	-0.174562	0.938613	0.408033	0.0749131	0.203963	0.0702511	0.107187
11238	CA5B	0.325836	0.143869	2.26481	0.0235246	0.514966	0	0.192244	0.978832	0.892869	1.40086	0.685287	1.4465	0.248093	0.394486	0.259147	0.364397	0.0772064	0.0793002	0.143004	0.0634621
79781	IQCA1	-0.382337	0.168831	-2.26462	0.0235362	0.514966	17.5278	4.85012	0.183107	-0.519752	-2.41105	0.320074	-2.96003	-0.130021	-0.605828	0.125569	-0.639198	0.0625797	0.0631373	0.153909	0.0466313
3383	ICAM1	0.366954	0.162103	2.26371	0.0235921	0.515485	0	3.46452	0.325392	1.8781	-0.481422	1.54114	1.83748	0.583487	-0.155122	0.5087	0.47287	0.0965215	0.103823	0.108953	0.0662276
130940	CCDC148	-0.311915	0.137928	-2.26143	0.0237329	0.517855	0	1.40405	0.704585	-1.47935	-1.67869	0.273193	-1.19875	-0.397445	-0.455157	0.1182	-0.269631	0.0721795	0.0735158	0.187197	0.0505925
56888	KCMF1	0.288761	0.127853	2.25854	0.0239117	0.520559	0	2.06648	0.558724	-0.170759	1.3544	2.074	1.00124	-0.0532374	0.349526	0.496116	0.233439	0.0972001	0.0665987	0.0572204	0.0543588
51338	MS4A4A	0.296701	0.131378	2.25838	0.0239218	0.520559	0	3.2635	0.352755	0.837209	-0.26845	0.987279	2.73388	0.191762	-0.0786395	0.401993	0.515673	0.0524633	0.0858134	0.165789	0.0355787
282966	C10orf53	-0.239145	0.106144	-2.25303	0.0242573	0.527143	0	1.85785	0.602428	-1.29141	-0.583753	0.427371	-2.1778	-0.260317	-0.122389	0.18158	-0.363682	0.0406326	0.0439571	0.180521	0.0278873
125115	KRT40	0.306908	0.136314	2.25147	0.0243557	0.528565	0	0.916477	0.82145	1.53953	0.935075	1.47304	0.755806	0.354231	0.241703	0.661322	0.195149	0.0529417	0.0668148	0.201557	0.0666673
1031	CDKN2C	0.280725	0.124748	2.25034	0.0244276	0.528873	0	3.6922	0.296677	2.1292	-0.405981	0.30994	2.53356	0.459006	-0.100819	0.123003	0.390695	0.0464736	0.0616696	0.157498	0.0237801
10432	RBM14	0.386439	0.171766	2.24979	0.024462	0.528873	18.6077	4.91447	0.178168	0.889254	3.55445	0.448189	0.808465	0.200096	0.82501	0.169641	0.224194	0.0506321	0.0538733	0.143264	0.0769002
80723	SLC35G2	0.34339	0.152745	2.24813	0.024568	0.528873	4.37069	4.18282	0.242388	2.50163	2.00796	1.14384	-0.320054	0.531136	0.487263	0.448715	-0.0781859	0.0450782	0.0588864	0.153889	0.0596775
535	ATP6V0A1	0.306904	0.136479	2.24873	0.0245294	0.528873	0	0.895109	0.826608	1.25717	1.94369	0.509831	0.577552	0.32833	0.467863	0.176989	0.157368	0.0682077	0.0579404	0.120515	0.0742426
5539	PPY	0.326241	0.145117	2.24813	0.0245679	0.528873	0	3.29488	0.348356	-0.151249	1.96478	1.75454	1.39448	-0.0408518	0.45814	0.823914	0.342936	0.0729517	0.0543714	0.220513	0.0604782
84451	MAP3K21	0.557941	0.248043	2.24937	0.0244888	0.528873	50.6106	8.0989	0.0440114	-0.530016	2.14333	2.20475	4.03903	-0.159555	0.699709	0.973074	0.788404	0.0906245	0.106576	0.194792	0.0381016
6524	SLC5A2	0.405546	0.180668	2.24471	0.024787	0.532871	9.31705	4.41097	0.22037	2.68884	1.70423	1.08186	0.148272	0.788981	0.462931	0.532415	0.0339826	0.0860997	0.0737864	0.24219	0.0525284
2805	GOT1	0.299309	0.133411	2.24351	0.0248639	0.533092	0	2.16633	0.53861	1.05967	0.167973	2.00627	1.42248	0.273565	0.0435557	0.639976	0.350407	0.0666465	0.0672373	0.101754	0.060681
24137	KIF4A	0.429822	0.191574	2.24363	0.0248559	0.533092	0	2.12778	0.546313	0.400465	0.293027	2.17675	1.47553	0.183685	0.135809	0.95566	0.414848	0.210387	0.214803	0.192748	0.0790462
9831	ZNF623	0.290168	0.12945	2.24155	0.0249906	0.535093	0	2.86237	0.413335	-0.105233	1.91195	1.5653	1.33045	-0.0283699	0.515254	0.646326	0.25952	0.0726797	0.0726255	0.170493	0.038049
23439	ATP1B4	-0.327537	0.146218	-2.24005	0.0250877	0.53574	0	0.481394	0.92296	-1.04221	-1.63113	-0.748525	-1.09184	-0.345187	-0.481427	-0.369143	-0.232433	0.109697	0.0871129	0.243207	0.0453187
9457	FHL5	0.310444	0.138572	2.24031	0.0250707	0.53574	0	3.3636	0.338888	2.72885	0.338307	0.951315	0.746178	0.650528	0.0740562	0.348095	0.203938	0.0568295	0.0479181	0.133889	0.0746984
7818	DAP3	-0.334264	0.14938	-2.23768	0.025242	0.538318	9.41787	4.41588	0.219917	-0.821492	-1.49751	-2.85473	-0.473508	-0.168852	-0.334062	-0.890703	-0.126414	0.0422478	0.0497643	0.0973497	0.0712751
10209	EIF1	0.555887	0.248508	2.2369	0.0252929	0.538685	60.8488	10.2168	0.0168104	1.84977	0.0540939	4.64826	1.77805	0.436758	0.0153567	1.21283	0.536752	0.0557503	0.0805928	0.0680804	0.0911299
6929	TCF3	0.314851	0.140887	2.23478	0.0254317	0.540921	0	0.174835	0.981546	0.700479	1.16646	1.33137	1.24308	0.210149	0.330042	0.376258	0.329206	0.0900044	0.0800568	0.0798685	0.0701358
493	ATP2B4	0.507255	0.227101	2.23361	0.0255086	0.541839	43.2711	7.05109	0.0702872	1.58571	1.606	3.3574	0.266128	0.429194	0.499035	1.25544	0.0661859	0.0732588	0.0965544	0.139825	0.0618514
51299	NRN1	0.420225	0.188297	2.23172	0.0256338	0.543776	0	3.846	0.278581	2.0871	1.30292	1.95556	0.221259	0.605208	0.424795	1.18715	0.058652	0.0840856	0.106297	0.368523	0.0702692
6820	SULT2B1	0.275099	0.123444	2.22853	0.025845	0.546809	0	2.13797	0.54427	2.07866	1.30389	-0.370141	0.972807	0.472176	0.349403	-0.147696	0.19065	0.0515988	0.0718076	0.159222	0.0384077
3950	LECT2	0.317736	0.142574	2.22858	0.0258422	0.546809	0	1.89631	0.594205	1.85369	1.23079	-0.644507	1.22329	0.465282	0.314548	-0.340949	0.321933	0.0630024	0.0653143	0.279849	0.069258
4901	NRL	0.326884	0.146859	2.22584	0.0260249	0.549888	0	0.244436	0.970116	0.922255	1.60158	0.650419	1.16624	0.258518	0.436977	0.274654	0.305243	0.0785741	0.0744418	0.178314	0.0685032
84866	TMEM25	-0.331774	0.149235	-2.22316	0.0262051	0.550299	0	0.312848	0.957594	-1.44204	-1.35833	-0.700617	-0.916446	-0.421837	-0.401763	-0.268073	-0.236989	0.0855722	0.0874847	0.146401	0.0668719
59335	PRDM12	0.323219	0.145337	2.22393	0.0261535	0.550299	0	2.05504	0.561061	0.750412	2.40737	0.164833	0.784336	0.196728	0.634079	0.0817379	0.207335	0.0687279	0.0693748	0.245901	0.0698781
90780	PYGO2	0.441064	0.198501	2.22198	0.0262849	0.550299	0	3.97878	0.263765	-0.0291169	2.76426	1.14296	1.27385	-0.0111156	1.02083	0.430439	0.349653	0.145738	0.13638	0.141828	0.0753425
56673	C11orf16	0.374125	0.168256	2.22354	0.0261794	0.550299	0	1.95331	0.582154	1.80025	1.6766	0.639072	0.661173	0.658686	0.651467	0.341332	0.157047	0.133873	0.150983	0.28527	0.0564195
7275	TUB	0.531102	0.238913	2.22299	0.0262166	0.550299	72.93	14.7765	0.00201795	6.40663	0.839377	0.210648	3.32588	1.10008	0.177126	0.0718815	0.617024	0.029484	0.0445298	0.116444	0.0344183
7169	TPM2	0.330428	0.148559	2.22422	0.0261335	0.550299	0	2.96107	0.397666	0.513768	2.3891	1.31384	0.458584	0.152979	0.718344	0.498075	0.114602	0.0886603	0.090406	0.143715	0.0624517
64743	WDR13	0.309271	0.139158	2.22245	0.0262529	0.550299	0	3.16832	0.366395	-0.00179964	2.05457	1.98658	0.480594	-0.000498763	0.534573	0.54542	0.130853	0.0768101	0.0676974	0.0753788	0.0741326
43	ACHE	0.509602	0.229402	2.22143	0.0263216	0.550347	41.6082	6.85027	0.0768264	3.39962	2.47157	0.222457	0.606105	1.02311	0.712586	0.0990783	0.138925	0.0905703	0.0831242	0.198366	0.0525371
5315	PKM	0.318766	0.14358	2.22012	0.0264106	0.550771	0	1.92895	0.587283	0.111094	0.834198	1.09537	2.22482	0.0355522	0.261672	0.283712	0.60166	0.102412	0.0983957	0.0670856	0.0731331
899	CCNF	0.403539	0.181729	2.22055	0.0263812	0.550771	0	2.91633	0.404706	1.47577	1.55493	1.80307	0.0207483	0.59578	0.641591	0.688055	0.00614424	0.16298	0.170253	0.14562	0.0876942
56139	PCDHA10	-0.286336	0.129027	-2.21919	0.0264737	0.551368	0	3.30106	0.347495	-0.486885	-1.22871	0.627484	-2.64748	-0.110209	-0.283052	0.344104	-0.514236	0.0512363	0.0530683	0.300727	0.0377276
2342	FNTB	-0.322006	0.145258	-2.21679	0.0266376	0.553344	0	1.75105	0.625644	-0.847762	-1.2254	0.521153	-2.04286	-0.227132	-0.38119	0.287775	-0.458536	0.0717811	0.0967669	0.304913	0.0503811
201799	TMEM154	-0.362513	0.163518	-2.21696	0.0266257	0.553344	0	2.38468	0.496492	-2.10985	-0.629316	0.0952753	-1.56301	-0.649716	-0.241007	0.0329341	-0.457591	0.0948295	0.146663	0.11949	0.0857096
200312	RNF215	0.382657	0.173892	2.20055	0.0277682	0.553767	0	1.24879	0.741328	0.278138	1.80038	0.212387	1.65147	0.11902	0.664868	0.110118	0.405865	0.183112	0.136378	0.268821	0.0603978
3566	IL4R	0.496023	0.225132	2.20325	0.0275768	0.553767	46.1586	7.42922	0.0594051	1.09357	1.27362	4.44432	0.31109	0.300507	0.410018	1.04964	0.100409	0.0755124	0.103639	0.0557794	0.104178
50	ACO2	0.338475	0.153832	2.20029	0.0277862	0.553767	0	2.7486	0.432031	0.781412	0.150027	0.745646	2.52998	0.211353	0.0485479	0.302962	0.702197	0.0731571	0.104714	0.165086	0.0770343
6045	RNF2	-0.354003	0.160643	-2.20367	0.0275476	0.553767	0	1.1401	0.767403	-2.01762	-0.766684	-0.277702	-1.12274	-0.639841	-0.233569	-0.162442	-0.288834	0.100569	0.0928103	0.342169	0.066181
166824	RASSF6	0.416368	0.189033	2.20263	0.0276211	0.553767	45.0875	7.28432	0.063367	3.21373	0.551397	-0.557464	3.92132	0.731288	0.126889	-0.248736	0.649703	0.0517794	0.0529565	0.199087	0.0274514
4733	DRG1	0.266774	0.121338	2.1986	0.0279063	0.553767	0	3.64369	0.302598	2.05363	-0.271083	0.577459	2.29307	0.371118	-0.0636856	0.153009	0.501187	0.0326572	0.0551923	0.0702085	0.047771
6693	SPN	0.284714	0.129105	2.20529	0.0274334	0.553767	0	1.96993	0.578671	0.544266	0.524818	0.543989	2.44247	0.146267	0.144096	0.160617	0.527827	0.0722226	0.075385	0.0871777	0.0467007
9633	TESMIN	0.385012	0.173792	2.21536	0.0267351	0.553767	0	3.69793	0.295984	-0.112979	0.536979	2.07683	2.48017	-0.0391605	0.188655	0.955196	0.507089	0.120143	0.12343	0.211535	0.0418029
23250	ATP11A	0.468061	0.212637	2.20122	0.0277205	0.553767	53.6227	8.62491	0.0347168	3.0837	3.36022	-0.65119	1.78675	0.789692	0.816698	-0.196449	0.379433	0.06558	0.0590727	0.0910087	0.0450964
374864	CCDC178	0.313879	0.142322	2.20542	0.0274245	0.553767	0	1.76659	0.622233	2.03931	1.47132	-0.165626	0.528642	0.531816	0.362162	-0.0868377	0.13872	0.0680073	0.0605888	0.27489	0.0688581
57524	CASKIN1	0.444194	0.201462	2.20485	0.0274646	0.553767	38.7218	6.52761	0.08858	1.32109	0.518271	3.582	1.09134	0.359031	0.14716	1.12343	0.252488	0.0738586	0.0806244	0.0983646	0.0535257
170691	ADAMTS17	0.434781	0.196465	2.21302	0.0268962	0.553767	2.06893	4.08451	0.252482	0.673954	2.90971	1.12674	0.559776	0.235938	0.996068	0.459719	0.152366	0.122556	0.117187	0.166472	0.074088
10921	RNPS1	0.290016	0.131784	2.20069	0.027758	0.553767	0	0.983194	0.805318	1.7831	1.03109	0.184186	1.24487	0.437879	0.328813	0.055623	0.276982	0.0603056	0.101696	0.0911998	0.0495057
26137	ZBTB20	-0.405549	0.18367	-2.20803	0.027242	0.553767	33.1909	5.9872	0.112234	-2.27097	-2.48885	-1.81635	0.336647	-0.611324	-0.649559	-0.515549	0.0774394	0.0724637	0.0681147	0.0805639	0.0529144
10652	YKT6	0.330443	0.149835	2.20538	0.0274277	0.553767	0	3.45595	0.326521	0.0277101	2.38173	1.65785	0.757288	0.00817314	0.705335	0.487823	0.182819	0.0869962	0.0877011	0.0865831	0.05828
23268	DNMBP	-0.440318	0.199229	-2.21011	0.0270978	0.553767	32.8485	5.95668	0.113737	-1.94291	-3.38051	0.388957	-1.2616	-0.54235	-0.912457	0.153071	-0.282004	0.0779208	0.0728551	0.154875	0.0499647
1629	DBT	-0.427793	0.194152	-2.20339	0.0275672	0.553767	43.5678	7.08815	0.0691405	0.115696	-1.761	-3.65293	-1.51828	0.0316773	-0.525832	-0.915131	-0.304048	0.0749646	0.0891611	0.06276	0.0401035
6656	SOX1	-0.38842	0.1759	-2.20818	0.0272315	0.553767	19.8337	4.98963	0.172558	-0.0707249	-2.95286	-1.8521	-0.886768	-0.0177344	-0.738608	-0.631226	-0.234358	0.0628762	0.0625666	0.116155	0.069846
84951	TNS4	0.313527	0.14211	2.20622	0.0273684	0.553767	0	1.48304	0.686191	2.16639	0.850049	0.256594	0.932097	0.586943	0.24097	0.105954	0.22228	0.073404	0.0803594	0.170507	0.0568693
533	ATP6V0B	0.280829	0.12763	2.20034	0.0277829	0.553767	0	2.65175	0.448489	1.93708	1.87739	0.0690371	0.459978	0.461872	0.49488	0.0176058	0.122793	0.0568521	0.0694846	0.065035	0.071264
342527	SMTNL2	-0.450016	0.20413	-2.20456	0.0274851	0.553767	41.7257	6.86409	0.0763582	-0.587412	-0.989493	-2.29226	-3.02432	-0.122405	-0.219108	-1.20663	-0.769374	0.043422	0.0490332	0.27709	0.064717
1378	CR1	0.359489	0.163406	2.19998	0.0278085	0.553767	0	1.53417	0.674407	0.808983	-0.419107	1.45033	1.85486	0.315912	-0.211153	0.447412	0.457386	0.152494	0.25383	0.0951656	0.0608056
139212	PIH1D3	-0.318964	0.145105	-2.19817	0.0279373	0.553767	0	2.77171	0.428178	-2.42231	-0.563646	-1.12596	-0.388076	-0.621152	-0.169183	-0.573961	-0.093199	0.0657564	0.0900953	0.25985	0.057675
6118	RPA2	-0.269047	0.121828	-2.20841	0.0272155	0.553767	0	1.33132	0.721709	-0.945076	-1.76953	-1.47542	-0.0844478	-0.186536	-0.372694	-0.464857	-0.0280089	0.0389577	0.0443599	0.0992668	0.110006
6585	SLIT1	0.335295	0.151356	2.21527	0.0267417	0.553767	0	0.531351	0.911952	1.37965	0.817052	0.414402	1.64196	0.422606	0.238279	0.159891	0.430924	0.0938281	0.0850499	0.148869	0.0688777
221044	UCMA	-0.331622	0.150062	-2.20991	0.0271115	0.553767	0	2.56196	0.464198	-0.0728813	-1.12652	-0.327551	-2.46252	-0.0207394	-0.321988	-0.171633	-0.612268	0.080977	0.0816963	0.274565	0.0618192
5888		0.274338	0.123983	2.2127	0.0269181	0.553767	0	2.19262	0.533404	0.221079	1.59853	-0.249146	2.10296	0.0565095	0.467804	-0.110633	0.366074	0.0653354	0.0856419	0.197179	0.0303025
5888	RAD51	0.274338	0.123983	2.2127	0.0269181	0.553767	0	2.19262	0.533404	0.221079	1.59853	-0.249146	2.10296	0.0565095	0.467804	-0.110633	0.366074	0.0653354	0.0856419	0.197179	0.0303025
1460	CSNK2B	0.271829	0.122727	2.21491	0.0267665	0.553767	0	0.251864	0.968812	0.900277	0.91928	1.24417	1.39791	0.219928	0.216027	0.379963	0.306471	0.0596772	0.0552233	0.0932659	0.0480644
345557	PLCXD3	0.354887	0.160417	2.21227	0.0269478	0.553767	0	3.81103	0.282606	3.02567	0.509133	0.548292	0.790796	0.771965	0.138536	0.235405	0.194047	0.0650958	0.0740391	0.184334	0.0602124
54899	PXK	0.636306	0.289407	2.19866	0.0279023	0.553767	65.2733	11.5185	0.00922839	1.23201	0.503243	5.57169	1.72515	0.38891	0.189194	1.40022	0.447675	0.0996477	0.141337	0.0631565	0.0673399
10878	CFHR3	-0.294762	0.133771	-2.20348	0.027561	0.553767	0	1.05105	0.788902	-0.779102	-0.67146	-1.52546	-1.58792	-0.22652	-0.169185	-0.662632	-0.331092	0.0845326	0.0634872	0.188687	0.0434754
26224	FBXL3	0.52322	0.237755	2.20067	0.0277593	0.553767	62.7799	10.7469	0.0131764	-0.235157	3.00358	3.8317	1.59893	-0.0561066	0.759709	1.05111	0.385426	0.0569259	0.063976	0.0752512	0.0581061
10981	RAB32	0.342732	0.154788	2.2142	0.0268151	0.553767	0	3.87944	0.27478	0.296798	0.513432	3.09321	0.975256	0.0769717	0.150375	0.687499	0.333273	0.0672577	0.0857799	0.0493999	0.116779
3371	TNC	-0.330708	0.150031	-2.20426	0.0275058	0.553767	0	1.65146	0.64778	-1.6467	-0.16049	-0.138195	-1.93746	-0.587332	-0.0632275	-0.0519329	-0.403625	0.127215	0.15521	0.141222	0.0434001
55052	MRPL20	0.489402	0.22225	2.20203	0.0276629	0.553767	36.4299	6.29227	0.0982251	1.33996	-0.0249957	3.48957	1.62701	0.359286	-0.0108312	1.23618	0.366197	0.0718949	0.187769	0.125494	0.0506584
6779	STATH	-0.314039	0.142369	-2.20581	0.027397	0.553767	0	3.06736	0.381356	-1.06871	-1.7308	0.986641	-1.73644	-0.291429	-0.507054	0.506116	-0.370588	0.0743613	0.0858254	0.263137	0.0455473
2717	GLA	0.343309	0.156233	2.19741	0.0279911	0.554147	0	3.79232	0.284781	2.71601	0.67396	-0.180233	1.53549	0.701133	0.171095	-0.0631715	0.413736	0.0666403	0.0644479	0.12285	0.0726029
54984	PINX1	-0.289662	0.131849	-2.19691	0.0280266	0.554165	0	2.76365	0.429518	-2.56956	-0.435707	-0.794461	-0.407961	-0.602412	-0.134788	-0.249864	-0.0941638	0.0549629	0.0957	0.0989154	0.0532759
7534	YWHAZ	0.355036	0.161686	2.19583	0.0281039	0.55501	0	2.77612	0.427447	1.13001	-0.547629	2.17957	1.12714	0.41333	-0.255253	0.649591	0.291838	0.133792	0.217254	0.0888255	0.0670391
10959	TMED2	-0.337625	0.154131	-2.1905	0.0284881	0.555268	0	0.564077	0.904605	-1.16294	-0.492491	-0.901274	-1.71904	-0.34046	-0.153153	-0.365631	-0.459277	0.085708	0.0967063	0.164578	0.0713801
5676	PSG7	-0.291787	0.133016	-2.19363	0.028262	0.555268	0	1.85331	0.603403	-0.630082	-2.11534	-1.10302	-0.759612	-0.174773	-0.561095	-0.483685	-0.154706	0.0769406	0.0703578	0.192291	0.0414794
128876	FAM83C	0.343058	0.156452	2.19273	0.0283266	0.555268	0	3.32891	0.34364	0.291983	2.55585	0.0307756	1.48047	0.0804458	0.737035	0.0137776	0.371692	0.0759085	0.0831582	0.200416	0.0630331
11151	CORO1A	0.322499	0.146933	2.19487	0.0281726	0.555268	0	1.58814	0.662082	1.15925	2.07112	0.848225	0.229644	0.307486	0.599768	0.268175	0.0719857	0.0703548	0.0838605	0.099957	0.098261
128346	C1orf162	-0.245592	0.111993	-2.19293	0.0283127	0.555268	0	0.238449	0.971156	-0.745896	-1.09705	-1.57055	-0.906028	-0.162964	-0.281239	-0.296382	-0.230248	0.0477338	0.0657204	0.0356125	0.0645814
84267	C9orf64	-0.358178	0.163501	-2.19067	0.0284756	0.555268	0	1.45641	0.692366	-1.51975	-0.429761	-1.77714	-0.776458	-0.522257	-0.179593	-0.648368	-0.195958	0.118093	0.174631	0.133107	0.0636928
4001	LMNB1	0.384717	0.175316	2.19443	0.0282048	0.555268	0	2.15905	0.54006	1.12058	1.07841	2.13004	0.137118	0.375091	0.382872	0.791308	0.0472223	0.112044	0.126048	0.138012	0.118606
652968	CASTOR1	0.446887	0.203915	2.19154	0.0284129	0.555268	0	3.96934	0.264794	0.576215	0.438642	2.77403	1.38274	0.210463	0.150003	1.12572	0.437848	0.133408	0.116945	0.16468	0.100269
286826	LIN9	-0.355868	0.162237	-2.19351	0.0282704	0.555268	0	2.1586	0.54015	-0.50005	0.238225	-1.03131	-2.36637	-0.187263	0.0964963	-0.418632	-0.547239	0.140242	0.164076	0.164774	0.0534797
1060	CENPC	0.35135	0.1603	2.19182	0.0283924	0.555268	0	1.70752	0.635264	0.297193	0.556479	1.96305	1.50335	0.109723	0.201096	0.756034	0.362695	0.136308	0.13059	0.148328	0.0582055
79109	MAPKAP1	0.263954	0.120507	2.19036	0.0284984	0.555268	0	1.14071	0.767256	1.07723	0.0239449	1.0266	1.92963	0.271508	0.00725187	0.239524	0.395143	0.0635259	0.0917224	0.0544375	0.0419333
7008	TEF	0.402242	0.183689	2.1898	0.0285386	0.555375	3.68916	4.15322	0.245388	-0.193902	1.67483	0.935259	2.70259	-0.0593067	0.563104	0.313812	0.751767	0.0935499	0.113041	0.112584	0.0773763
117194	MRGPRX2	-0.612484	0.279827	-2.1888	0.0286117	0.556123	61.6358	10.4264	0.0152687	0.160781	-1.51287	-2.31619	-5.03473	0.0451497	-0.486118	-1.08822	-1.00589	0.0788569	0.103248	0.220743	0.0399163
30848	CTAG2	-0.311295	0.142286	-2.18781	0.0286838	0.55642	0	2.64514	0.449632	-0.271769	-0.480098	-1.31211	-2.325	-0.0866221	-0.114869	-0.646801	-0.548513	0.101592	0.0572459	0.242996	0.0556579
27302	BMP10	0.316369	0.144617	2.18763	0.0286965	0.55642	0	2.36459	0.500261	0.041297	2.06511	1.16085	1.23949	0.0109828	0.54857	0.58297	0.314438	0.0707272	0.0705627	0.252196	0.0643552
54039	PCBP3	0.328603	0.150294	2.1864	0.0287861	0.557482	0	3.06536	0.381658	0.165692	1.93958	-0.582931	1.98244	0.0545754	0.574546	-0.304255	0.428584	0.10849	0.0877476	0.272422	0.0467381
145864	HAPLN3	0.3809	0.174452	2.18341	0.029006	0.557694	0	0.948143	0.813797	1.67581	1.04542	0.263622	1.32086	0.653092	0.404641	0.107485	0.35838	0.15188	0.149817	0.166241	0.0736159
51765	STK26	-0.296879	0.135923	-2.18417	0.0289496	0.557694	0	2.68837	0.442207	-2.27562	-1.48374	-0.180417	-0.215568	-0.555206	-0.409877	-0.0687917	-0.0517603	0.0595261	0.0763111	0.145384	0.0576533
5020	OXT	0.337458	0.154483	2.18443	0.0289304	0.557694	0	1.12688	0.77059	0.440456	1.93295	0.382777	1.34975	0.129578	0.558057	0.219028	0.345107	0.0865478	0.0833521	0.327423	0.0653737
25823	TPSG1	0.349278	0.159952	2.18364	0.0289889	0.557694	0	1.50527	0.681053	1.00023	0.296687	1.01576	2.03797	0.333582	0.0847078	0.554847	0.535636	0.111226	0.0815171	0.298379	0.069079
10079	ATP9A	0.331312	0.151733	2.18352	0.0289976	0.557694	0	1.4534	0.693067	0.825362	0.143245	1.70397	1.61738	0.275786	0.0535803	0.732033	0.345511	0.11165	0.139911	0.184561	0.0456354
79801	SHCBP1	-0.336919	0.15422	-2.18466	0.0289139	0.557694	0	3.0484	0.384224	-2.40849	-0.0412108	-0.594684	-1.32248	-0.689269	-0.0109197	-0.306748	-0.371837	0.0819008	0.0702093	0.266067	0.0790547
22928	SEPHS2	0.290073	0.132935	2.18207	0.0291045	0.557933	0	1.80513	0.613819	-0.2456	0.571434	2.13812	1.26813	-0.0797368	0.220477	0.423274	0.328896	0.105405	0.148866	0.0391904	0.0672653
51177	PLEKHO1	-0.424031	0.194347	-2.18182	0.0291229	0.557933	33.9243	6.05366	0.109028	0.107381	-1.30709	-2.24327	-2.81332	0.0264445	-0.321887	-0.801764	-0.744014	0.060648	0.0606449	0.127741	0.0699399
552	AVPR1A	-0.315261	0.144494	-2.18183	0.0291221	0.557933	0	3.63319	0.303895	-1.4564	-1.38247	-2.18324	-0.23757	-0.427865	-0.398362	-0.701281	-0.0454636	0.0863081	0.0830315	0.103177	0.036622
2313	FLI1	0.370378	0.170333	2.17444	0.0296722	0.559752	0	1.4592	0.691719	-0.0470234	0.554035	1.83933	1.57958	-0.0205788	0.276028	0.648905	0.381067	0.191519	0.248218	0.124464	0.0581992
1392	CRH	-0.455356	0.208879	-2.17999	0.029258	0.559752	23.9365	5.25876	0.153801	-1.16868	-0.947272	-3.2172	-0.503198	-0.349314	-0.338275	-1.1202	-0.135713	0.0893384	0.127523	0.121237	0.0727384
10911	UTS2	0.356968	0.164107	2.17522	0.0296139	0.559752	0	1.68669	0.639897	0.507658	2.03935	-0.702174	1.22822	0.224982	0.481044	-0.560987	0.347382	0.196405	0.0556395	0.638287	0.0799944
7783	ZP2	-0.280804	0.128937	-2.17785	0.0294175	0.559752	0	1.66648	0.644412	-1.84552	-1.39156	-1.01129	-0.210673	-0.467497	-0.334429	-0.353225	-0.0482598	0.064168	0.0577568	0.121997	0.0524751
8209	C21orf33	0.263204	0.120876	2.17747	0.0294457	0.559752	0	2.06005	0.560036	2.24342	-0.0926063	0.99605	0.876232	0.445017	-0.0292332	0.405034	0.168803	0.0393487	0.099649	0.165357	0.0371127
54520	CCDC93	0.434239	0.199519	2.17643	0.029523	0.559752	13.48	4.62321	0.20156	0.0925415	0.247622	2.72294	2.29263	0.0319572	0.0908487	0.91549	0.585841	0.119252	0.134604	0.113039	0.0652966
322	APBB1	-0.365814	0.168045	-2.17689	0.029489	0.559752	32.2196	5.90141	0.116506	-1.20225	-0.853762	0.114832	-4.14087	-0.240875	-0.193751	0.0570785	-0.738944	0.0401414	0.0515011	0.247071	0.0318449
10590	SCGN	0.389375	0.179002	2.17525	0.0296113	0.559752	0	2.66502	0.446204	1.56919	-0.0816408	-0.0402556	2.21949	0.544739	-0.0312097	-0.0220326	0.622064	0.120512	0.146138	0.299555	0.0785535
2786	GNG4	-0.291705	0.13392	-2.1782	0.0293913	0.559752	0	2.78165	0.426529	0.114772	-1.18801	-1.25596	-2.12702	0.0279353	-0.317037	-0.447713	-0.516384	0.0592422	0.0712168	0.12707	0.058939
3744	KCNA10	0.28022	0.128856	2.17468	0.029654	0.559752	0	1.16867	0.760527	0.824055	0.597466	0.744574	2.07545	0.205781	0.137973	0.308803	0.46849	0.062359	0.0533289	0.172008	0.0509538
3904	LAIR2	-0.444532	0.204016	-2.1789	0.0293389	0.559752	0	1.42868	0.698827	-1.50343	0.0908409	-0.581757	-1.88926	-0.644277	0.044741	-0.31592	-0.567915	0.183645	0.242576	0.294897	0.0903615
85395	FAM207A	0.310621	0.142754	2.17592	0.0295612	0.559752	0	2.44492	0.485328	-0.0647464	0.887915	0.27595	2.51213	-0.0191496	0.283544	0.127292	0.522304	0.0874764	0.101976	0.212783	0.0432276
10179	RBM7	-0.386287	0.177267	-2.17913	0.0293221	0.559752	0	3.1573	0.368003	-1.92965	-1.05254	0.617699	-1.76207	-0.75467	-0.428772	0.273318	-0.433733	0.152953	0.165949	0.195786	0.0605899
4257	MGST1	0.339995	0.156448	2.17321	0.0297644	0.559753	0	3.88675	0.273955	0.566636	0.416929	0.545732	3.17753	0.145892	0.121527	0.204533	0.696147	0.066291	0.0849614	0.140465	0.047998
10106	CTDSP2	-0.292331	0.134549	-2.17267	0.0298051	0.559753	0	3.53855	0.315797	-0.632989	-0.31034	-2.63317	-1.25602	-0.135049	-0.0841261	-0.71022	-0.310832	0.0455186	0.0734827	0.0727491	0.0612437
63892	THADA	-0.380694	0.175264	-2.17212	0.029847	0.559753	45.4652	7.33476	0.0619596	-2.38963	0.301924	-2.68739	-2.03234	-0.519922	0.0603973	-0.846243	-0.386819	0.0473384	0.0400166	0.0991582	0.0362262
5045	FURIN	0.370268	0.170454	2.17224	0.0298377	0.559753	0	2.70977	0.43857	0.656897	2.47175	0.906906	0.254653	0.230075	0.780236	0.369832	0.0796697	0.122672	0.099642	0.166297	0.0978787
51406	NOL7	-0.395435	0.182012	-2.17257	0.0298124	0.559753	38.7071	6.52604	0.0886413	-0.430723	-2.57095	-0.1536	-3.27231	-0.0999374	-0.579975	-0.0445247	-0.805837	0.0538343	0.0508901	0.0840272	0.0606436
92335	STRADA	0.459532	0.211675	2.17094	0.029936	0.560767	61.7241	10.4504	0.0151008	1.08075	4.15515	-0.500413	3.70734	0.201178	0.840118	-0.184045	0.757984	0.0346503	0.0408797	0.135266	0.0418017
2246	FGF1	0.37296	0.171903	2.16959	0.0300378	0.562016	29.233	5.65235	0.129805	0.0516702	1.8753	0.244061	3.87943	0.0128506	0.45251	0.097244	0.689686	0.0618542	0.0582259	0.158756	0.0316059
6301	SARS	0.545125	0.251357	2.16872	0.0301036	0.56259	57.3508	9.37885	0.0246558	-0.172456	0.707094	4.13794	3.33193	-0.0508751	0.252769	0.938732	0.920263	0.0870269	0.127789	0.0514653	0.0762839
2662	GDF10	-0.368954	0.170168	-2.16818	0.0301451	0.562709	4.97668	4.20949	0.239713	-0.551046	-2.58968	0.555199	-2.18437	-0.162763	-0.651527	0.230724	-0.522612	0.0872438	0.0632955	0.172699	0.0572408
89876	MAATS1	-0.528202	0.243918	-2.16549	0.0303505	0.56516	55.2896	8.94647	0.0300111	-0.658744	0.0448527	-3.12181	-3.91581	-0.177448	0.0151941	-0.888744	-0.967087	0.0725618	0.114755	0.0810474	0.0609942
51148	CERCAM	0.320878	0.148207	2.16507	0.0303823	0.56516	0	0.993292	0.802875	1.26554	1.56652	-0.0329651	1.27443	0.378624	0.490394	-0.013646	0.297796	0.0895081	0.0979984	0.171358	0.054602
894	CCND2	0.289185	0.133524	2.16579	0.0303271	0.56516	0	0.829706	0.842349	1.38927	0.207984	0.720287	1.74018	0.342584	0.0625985	0.245561	0.389101	0.0608083	0.0905879	0.116227	0.0499963
55240	STEAP3	0.259133	0.119757	2.16382	0.0304785	0.566292	0	1.15186	0.764573	1.17491	1.94895	0.437254	0.68113	0.265147	0.455837	0.179963	0.13382	0.050929	0.0547038	0.169395	0.0385993
9343	EFTUD2	0.416972	0.192801	2.1627	0.030564	0.567223	33.4235	6.00812	0.111216	0.624953	3.54679	-0.20275	2.07214	0.134905	0.816729	-0.0995144	0.531468	0.0465976	0.0530255	0.240906	0.0657834
9592	IER2	0.383604	0.177446	2.16181	0.0306331	0.567848	0	1.29213	0.731004	0.276296	1.42682	1.57788	1.16776	0.0902249	0.488445	0.628606	0.425064	0.106636	0.11719	0.158712	0.132496
23096	IQSEC2	0.464205	0.214821	2.16089	0.0307037	0.568497	20.6201	5.03906	0.168959	0.953675	3.10584	-0.220738	1.71314	0.314133	1.02927	-0.0877856	0.483798	0.108499	0.109826	0.158159	0.0797525
64116	SLC39A8	0.327493	0.15159	2.16038	0.0307431	0.568571	0	2.70055	0.440134	-0.430381	0.1445	0.863353	2.53304	-0.218186	0.0745873	0.218808	0.562148	0.257007	0.266438	0.0642319	0.049251
3925	STMN1	0.30919	0.143366	2.15665	0.0310328	0.568673	5.78055	4.24541	0.236155	2.76639	-0.141475	0.463345	1.93321	0.617543	-0.0327773	0.188347	0.360015	0.0498318	0.0536768	0.165237	0.0346801
55034	MOCOS	-0.343544	0.159176	-2.15827	0.0309068	0.568673	0	0.295906	0.960797	-0.961278	-1.48079	-0.254806	-1.33128	-0.312616	-0.448853	-0.13222	-0.339076	0.10576	0.0918801	0.269262	0.0648714
7351	UCP2	0.354007	0.164066	2.15771	0.0309505	0.568673	0	1.81109	0.612524	1.79085	1.54707	0.470598	0.802987	0.702955	0.50604	0.12231	0.31473	0.154078	0.106992	0.0675493	0.153624
506	ATP5F1B	0.273587	0.126807	2.15751	0.0309658	0.568673	12.962	4.59569	0.203912	2.83505	0.24693	0.451753	1.94018	0.474945	0.0515382	0.0839744	0.558215	0.0280651	0.0435624	0.0345535	0.0827784
2554	GABRA1	0.283818	0.131571	2.15714	0.0309944	0.568673	0	2.17708	0.536477	0.822649	1.30633	2.04578	0.51175	0.200393	0.299653	0.784649	0.131645	0.0593384	0.0526175	0.147107	0.066175
2800	GOLGA1	0.35843	0.166172	2.15698	0.0310073	0.568673	28.4032	5.58685	0.133536	-0.0323303	1.23804	1.43618	3.24975	-0.00766711	0.293667	0.371596	0.78627	0.0562399	0.0562656	0.0669464	0.0585388
55584	CHRNA9	-0.282433	0.130765	-2.15984	0.0307848	0.568673	0	1.26231	0.738101	-1.67219	-1.66502	-0.452513	-0.39238	-0.414446	-0.389142	-0.230067	-0.0876821	0.0614276	0.0546234	0.258492	0.0499354
144608	C12orf60	0.369809	0.17127	2.15921	0.0308339	0.568673	5.64161	4.23916	0.236771	1.04576	1.76288	2.41515	0.312518	0.300353	0.470844	1.03151	0.0718824	0.08249	0.0713355	0.182414	0.0529047
29015	SLC43A3	0.356139	0.165174	2.15615	0.0310721	0.568743	32.6898	5.94263	0.114435	-0.160472	1.57202	1.27392	3.47611	-0.0340964	0.391062	0.397918	0.657634	0.0451458	0.0618836	0.0975676	0.0357917
6476	SI	-0.306925	0.142383	-2.15564	0.0311121	0.568826	0	0.443271	0.931166	-0.641004	-0.990184	-0.853963	-1.7232	-0.176014	-0.274902	-0.420961	-0.395586	0.0754005	0.0770767	0.243	0.0526998
763	CA5A	-0.366995	0.170384	-2.15393	0.0312459	0.570049	0	3.19633	0.362334	0.295366	-1.12569	-0.808382	-2.5191	0.0965926	-0.362573	-0.472611	-0.639989	0.106946	0.103741	0.341801	0.0645437
79977	GRHL2	0.31484	0.146188	2.15367	0.0312663	0.570049	0	0.965218	0.809667	1.22593	1.7167	-0.287626	1.0348	0.344314	0.395001	-0.144964	0.307963	0.0788814	0.052943	0.254019	0.0885704
23143	LRCH1	-0.30783	0.142949	-2.15342	0.0312858	0.570049	0	3.08486	0.378726	-0.832878	-0.766455	0.568203	-2.52729	-0.233007	-0.244696	0.227042	-0.540383	0.0782665	0.101925	0.159663	0.0457186
11235	PDCD10	0.338229	0.157172	2.15196	0.0314005	0.570854	0	3.71597	0.293813	1.22542	-0.603826	1.83651	2.18818	0.333907	-0.203997	0.657934	0.462964	0.0742467	0.114136	0.128345	0.0447638
57546	PDP2	-0.455375	0.21161	-2.15195	0.0314013	0.570854	39.2395	6.58323	0.0864374	-1.08386	0.511568	-2.79328	-3.15569	-0.340834	0.164459	-0.853565	-0.683638	0.0988868	0.103349	0.093378	0.0469314
1993	ELAVL2	-0.302721	0.140714	-2.15132	0.0314511	0.571112	0	0.214391	0.975233	-1.37123	-1.12706	-0.322332	-1.26022	-0.368769	-0.28239	-0.139479	-0.321053	0.0723252	0.0627781	0.187246	0.0649025
4342	MOS	0.456475	0.212292	2.15022	0.0315378	0.571651	24.6481	5.30842	0.150557	1.17614	3.3697	0.840705	0.345178	0.372288	1.00997	0.344521	0.0943836	0.100194	0.0898333	0.167936	0.0747666
22943	DKK1	-0.274273	0.127567	-2.15004	0.0315522	0.571651	0	1.92028	0.589117	-2.29212	-0.988648	-0.388227	-0.401223	-0.526636	-0.221774	-0.213026	-0.0912974	0.0527893	0.0503198	0.301088	0.0517781
26122	EPC2	-0.411034	0.191225	-2.14948	0.0315966	0.571809	13.9321	4.64749	0.199506	-2.13896	-0.100254	0.139135	-3.1758	-0.7152	-0.0322725	0.0603157	-0.64957	0.111803	0.103625	0.187926	0.0418356
171558	PTCRA	-0.597287	0.277981	-2.14866	0.0316615	0.572337	57.4308	9.39645	0.0244588	-0.112147	-0.841612	-4.20819	-2.56927	-0.0390381	-0.291136	-1.43587	-0.609303	0.121172	0.119666	0.116422	0.05624
2523	FUT1	0.331316	0.154312	2.14705	0.0317891	0.573996	0	1.17555	0.758873	1.43631	1.32808	1.32903	0.43847	0.443404	0.38112	0.594414	0.115707	0.0953016	0.0823518	0.200035	0.0696374
23596	OPN3	0.439979	0.205158	2.14459	0.0319858	0.574664	3.1262	4.12908	0.247859	0.275052	-0.598999	1.94259	2.91386	0.119401	-0.311838	0.588842	0.730766	0.188446	0.271023	0.0918827	0.0628953
54811	ZNF562	-0.322657	0.150532	-2.14345	0.0320773	0.574664	0	0.508049	0.91712	-0.996601	-1.17569	-1.49057	-0.710739	-0.2978	-0.351423	-0.503905	-0.197206	0.0892909	0.0893465	0.114285	0.0769876
1145	CHRNE	0.357093	0.166584	2.14363	0.0320629	0.574664	0	2.95703	0.398299	1.38969	1.12736	2.07501	0.210542	0.444943	0.395136	0.94796	0.0576248	0.102511	0.122848	0.208709	0.0749102
51421	AMOTL2	0.481	0.224163	2.14576	0.0318919	0.574664	26.8672	5.46951	0.140474	0.609884	0.489646	0.922734	3.91408	0.192481	0.157156	0.502284	0.947411	0.0996053	0.103015	0.296309	0.0585892
50852	TRAT1	0.354472	0.165315	2.14422	0.0320149	0.574664	0	3.19805	0.362086	0.284394	0.714683	2.38843	1.33781	0.0930651	0.242644	1.02641	0.33369	0.107086	0.115269	0.184678	0.0622155
5429	POLH	-0.271677	0.126628	-2.14548	0.0319144	0.574664	0	2.86277	0.413271	0.325884	-1.46601	-0.919382	-2.08931	0.0817364	-0.387161	-0.282931	-0.449842	0.0629076	0.0697438	0.094704	0.0463571
2251	FGF6	0.275585	0.12854	2.14395	0.0320366	0.574664	0	2.11413	0.549059	1.77271	0.282642	1.52238	1.08196	0.429871	0.0634508	0.671384	0.251328	0.0588033	0.0503964	0.194489	0.0539584
150	ADRA2A	0.424076	0.198018	2.14161	0.0322251	0.574815	0	3.97963	0.263672	2.50962	1.45223	-0.795966	1.3424	0.796865	0.496187	-0.426808	0.364929	0.100821	0.116739	0.287526	0.0739019
7007	TECTA	0.400093	0.186809	2.14172	0.0322157	0.574815	1.04787	4.04236	0.256926	2.57201	1.28769	-0.493837	1.48601	0.800652	0.48875	-0.192213	0.36663	0.0969043	0.144062	0.151496	0.0608715
122786	FRMD6	0.289191	0.13496	2.14279	0.03213	0.574815	0	3.64013	0.303037	0.285628	2.68179	0.0895193	1.48257	0.0622979	0.665971	0.0440073	0.273285	0.0475712	0.0616685	0.241667	0.0339785
6631	SNRPC	0.286852	0.133945	2.14156	0.0322293	0.574815	0	0.564224	0.904571	0.896796	0.544391	1.00078	1.74594	0.236195	0.147003	0.361123	0.391122	0.069367	0.0729173	0.130207	0.0501837
161198	CLEC14A	-0.4374	0.204316	-2.1408	0.0322901	0.575259	0.402636	4.01617	0.259723	-1.27033	0.301233	-2.29833	-1.88282	-0.497663	0.114304	-1.08075	-0.458604	0.153475	0.143985	0.221117	0.0593279
10982	MAPRE2	-0.290203	0.135755	-2.1377	0.0325412	0.579089	0	1.00356	0.800391	-0.473194	-1.20194	-1.5873	-1.17695	-0.112357	-0.334312	-0.481353	-0.329944	0.0563801	0.0773639	0.0919622	0.0785889
9508	ADAMTS3	-0.333404	0.156087	-2.13602	0.032678	0.580877	0	2.75181	0.431495	-0.888213	-2.49623	0.178948	-0.512103	-0.255891	-0.695598	0.120346	-0.137316	0.0829992	0.0776509	0.452283	0.0718999
1446	CSN1S1	-0.278672	0.130506	-2.13533	0.0327342	0.581231	0	1.56245	0.667934	-1.57448	-1.75725	-0.741566	-0.0724143	-0.366258	-0.394468	-0.373647	-0.017854	0.0541128	0.0503914	0.253877	0.0607884
1778	DYNC1H1	0.369954	0.173482	2.13252	0.0329641	0.584019	21.88	5.12033	0.163195	1.93245	2.92967	1.13187	-0.462557	0.456608	0.711527	0.341932	-0.134239	0.0558304	0.0589854	0.0912619	0.084222
81894	SLC25A28	0.266067	0.124759	2.13265	0.0329533	0.584019	0	1.14501	0.76622	1.60889	1.65616	0.175119	0.575475	0.357939	0.386885	0.0520474	0.151659	0.0494955	0.0545709	0.0883352	0.0694514
10953	TOMM34	0.29313	0.137585	2.13054	0.033127	0.586256	0	2.86413	0.413052	1.0587	0.389368	0.133896	2.47244	0.282789	0.107873	0.041434	0.631267	0.0713475	0.0767546	0.0957585	0.0651891
55208	DCUN1D2	-0.387845	0.182143	-2.12934	0.0332262	0.587364	16.0956	4.76733	0.189649	-0.392374	-0.00899571	-3.14512	-1.72396	-0.130137	-0.00301369	-0.837783	-0.415429	0.110003	0.112234	0.0709559	0.0580681
2780	GNAT2	-0.497409	0.233748	-2.12798	0.0333391	0.58806	23.7868	5.24844	0.154484	-2.03346	-1.91145	1.13133	-2.62499	-0.652776	-0.708503	0.603984	-0.69239	0.103052	0.13739	0.285016	0.0695739
10963	STIP1	0.339822	0.159664	2.12836	0.0333074	0.58806	0	1.84135	0.605979	1.47295	1.93	0.108785	0.68187	0.395867	0.65538	0.0352915	0.253961	0.0722313	0.115311	0.105246	0.138718
10309	CCNO	0.350188	0.164613	2.12735	0.0333913	0.588333	0	2.38494	0.496445	0.478337	0.722652	-0.021229	2.48175	0.141701	0.250186	-0.011785	0.665158	0.0877565	0.119858	0.308176	0.0718349
112939	NACC1	0.314336	0.147962	2.12443	0.0336343	0.58959	0	3.02937	0.387119	0.106248	1.02091	-0.0927399	2.56287	0.0336444	0.34071	-0.0342016	0.574019	0.100273	0.111376	0.136007	0.0501649
2182	ACSL4	-0.283616	0.133426	-2.12564	0.033533	0.58959	0	2.16532	0.538811	-0.664923	-0.209372	0.0542946	-2.48893	-0.199731	-0.0642887	0.0213502	-0.470232	0.0902296	0.0942831	0.154629	0.0356942
5154	PDGFA	-0.310939	0.146391	-2.12403	0.0336674	0.58959	0	1.42417	0.699878	-1.83875	-1.28264	-0.808089	-0.506471	-0.540124	-0.398529	-0.342857	-0.115706	0.0862864	0.0965399	0.180015	0.0521917
84891	ZSCAN10	-0.288889	0.136049	-2.12341	0.0337193	0.58959	0	2.46488	0.481672	-1.0695	-1.09162	-2.11041	-0.429495	-0.276606	-0.240955	-0.894472	-0.119186	0.0668905	0.0487224	0.179639	0.0770083
9708	PCDHGA8	0.474764	0.223587	2.1234	0.0337203	0.58959	55.0602	8.9008	0.0306393	3.65862	1.72559	2.223	-0.117001	0.812012	0.331321	1.15997	-0.0277732	0.0492595	0.0368658	0.27228	0.0563469
3350	HTR1A	-0.316769	0.149154	-2.12377	0.033689	0.58959	0	0.406043	0.938991	-0.710227	-1.31203	-0.950923	-1.33655	-0.190318	-0.351112	-0.523198	-0.360348	0.0718066	0.0716151	0.30272	0.07269
7185	TRAF1	-0.308031	0.145055	-2.12354	0.0337088	0.58959	0	0.701282	0.872902	-0.755556	-1.34679	-0.155772	-1.67384	-0.239993	-0.41871	-0.0583728	-0.372909	0.100894	0.0966558	0.140425	0.049634
9948	WDR1	0.43469	0.204766	2.12286	0.0337655	0.589737	42.1798	6.91799	0.074558	0.739685	-0.490269	2.7481	3.54096	0.185504	-0.194595	0.672682	0.803935	0.0628944	0.157541	0.0599177	0.0515465
26751	SH3YL1	0.345882	0.162981	2.12222	0.0338195	0.590036	0	2.90171	0.40703	1.54321	-0.461372	1.87677	1.1353	0.527658	-0.169429	0.604861	0.327048	0.116911	0.134857	0.10387	0.0829862
120425	JAML	0.556303	0.26256	2.11876	0.0341105	0.593819	66.6311	11.9872	0.00742708	-0.0814609	1.20578	4.75847	2.72553	-0.0195863	0.354437	1.04132	0.847845	0.0578103	0.0864051	0.0478885	0.0967676
3790	KCNS3	0.281291	0.132753	2.11891	0.0340983	0.593819	0	2.65205	0.448437	0.813924	2.52762	0.120067	0.275832	0.199358	0.565919	0.0626236	0.0680088	0.0599932	0.0501285	0.272036	0.0607912
57804	POLD4	0.322639	0.152315	2.11824	0.0341549	0.593946	0	0.601396	0.896113	0.931015	1.07643	0.28919	1.72604	0.252762	0.346985	0.117602	0.463527	0.0737073	0.103908	0.165373	0.0721192
4143	MAT1A	-0.269866	0.127471	-2.11707	0.0342542	0.594383	0	2.26623	0.51902	-1.23348	-2.20938	-0.548191	0.211771	-0.27835	-0.489072	-0.16341	0.0661679	0.0509235	0.0490009	0.0888572	0.0976252
5793	PTPRG	-0.328675	0.155241	-2.1172	0.0342432	0.594383	0	1.87067	0.599678	-0.439006	-1.01599	-2.16953	-0.649119	-0.141226	-0.335107	-0.682704	-0.183302	0.103488	0.10879	0.0990221	0.079742
2834	PRLHR	0.275012	0.129978	2.11583	0.0343592	0.595158	0	0.331512	0.953997	1.10484	1.23349	0.0613528	1.43608	0.261396	0.283	0.0297522	0.337771	0.0559761	0.0526379	0.235163	0.055321
339834	CCDC36	-0.501803	0.237184	-2.11567	0.0343732	0.595158	51.1762	8.19272	0.0421922	-1.72167	-1.46169	-3.48984	-0.164055	-0.49585	-0.413284	-1.26497	-0.0381938	0.0829466	0.0799442	0.131386	0.0542011
5433	POLR2D	0.267771	0.126593	2.1152	0.0344126	0.595196	0	1.50532	0.681042	2.11174	0.532417	0.367343	1.04954	0.474452	0.143176	0.0953114	0.281449	0.050478	0.0723159	0.0673205	0.0719117
4435	CITED1	0.337852	0.159777	2.11452	0.0344709	0.595338	0	3.54811	0.314575	0.635606	2.8399	0.487945	0.535098	0.169033	0.758035	0.241575	0.136093	0.0707241	0.071248	0.24511	0.0646848
114804	RNF157	0.557736	0.263855	2.1138	0.0345323	0.595338	50.321	8.0517	0.0449553	1.06638	0.373171	3.88712	1.59133	0.383069	0.12574	1.44702	0.380895	0.129042	0.113535	0.138578	0.0572919
2050	EPHB4	0.444338	0.21017	2.11418	0.0344996	0.595338	19.8057	4.98789	0.172686	1.16247	-0.0873691	3.19661	1.16127	0.440587	-0.032259	0.983836	0.310367	0.143649	0.136328	0.0947255	0.071431
10563	CXCL13	-0.293533	0.138907	-2.11316	0.0345868	0.595636	0	0.184705	0.98002	-1.37709	-0.975258	-0.262581	-1.3167	-0.331198	-0.235381	-0.151556	-0.347349	0.0578428	0.0582508	0.333135	0.0695918
58476	TP53INP2	0.32298	0.152876	2.11268	0.0346278	0.595703	0	1.26038	0.738563	0.719862	1.20393	1.86707	0.519825	0.213786	0.401307	0.584401	0.148567	0.0881985	0.11111	0.097972	0.0816827
55729	ATF7IP	-0.401668	0.1902	-2.11182	0.034702	0.596338	24.541	5.30089	0.151044	-0.838147	-3.04312	-1.63194	-0.210289	-0.283008	-1.02703	-0.375608	-0.0550244	0.114013	0.1139	0.0529736	0.0684665
80208	SPG11	-0.341132	0.161707	-2.10957	0.0348954	0.598692	12.3232	4.56221	0.206808	-2.0923	-1.7127	-1.97175	0.609853	-0.528058	-0.472624	-0.489323	0.167417	0.0636965	0.0761503	0.0615869	0.075361
51499	TRIAP1	0.27917	0.132348	2.10936	0.0349138	0.598692	0	2.63615	0.451187	1.56392	0.155788	2.02406	0.720143	0.355572	0.041732	0.734477	0.178837	0.0516925	0.0717579	0.131677	0.0616706
2695	GIP	0.300868	0.142917	2.10519	0.0352749	0.599358	0	2.36648	0.499904	1.44221	-0.00657093	0.0522649	2.17153	0.377476	-0.00184988	0.026019	0.516025	0.0685043	0.0792566	0.247834	0.0564689
11346	SYNPO	0.333519	0.15833	2.10648	0.0351627	0.599358	0	2.55965	0.464607	1.80116	1.8946	0.0935075	0.393043	0.570656	0.605745	0.0369466	0.106032	0.10038	0.102222	0.156119	0.0727764
55278	QRSL1	0.317827	0.150877	2.10654	0.0351577	0.599358	0	0.999585	0.801352	1.34245	0.0543027	0.960862	1.64582	0.452524	0.0198805	0.275431	0.418066	0.113628	0.134032	0.0821685	0.0645248
26526	TSPAN16	-0.289404	0.137474	-2.10515	0.0352782	0.599358	0	0.15113	0.985064	-1.29794	-0.920752	-0.440963	-1.36232	-0.359243	-0.260998	-0.177786	-0.29545	0.0766069	0.0803509	0.162552	0.0470339
158158	RASEF	-0.259939	0.123426	-2.10604	0.0352013	0.599358	0	1.06549	0.78541	-1.33615	-1.37572	-1.31943	-0.286504	-0.324708	-0.383332	-0.324174	-0.065276	0.0590578	0.0776402	0.060365	0.0519091
84666	RETNLB	-0.45834	0.217653	-2.10583	0.0352195	0.599358	49.0064	7.84412	0.0493455	-1.52813	-0.00205087	-3.72672	-1.5067	-0.413926	-0.000534489	-1.0906	-0.38362	0.073371	0.0679209	0.0856398	0.064826
80310	PDGFD	-0.35653	0.169132	-2.10801	0.0350305	0.599358	0	0.221872	0.973983	-0.980316	-1.16785	-0.409637	-1.47406	-0.385064	-0.43992	-0.17875	-0.366485	0.154289	0.141897	0.190412	0.0618129
54978	SLC35F6	0.376232	0.178731	2.10502	0.0352894	0.599358	1.78928	4.07288	0.253702	1.98106	-0.653799	1.07691	2.31186	0.54813	-0.228512	0.404107	0.589942	0.0765551	0.122161	0.140811	0.0651171
399818	EEF1AKMT2	0.328754	0.156308	2.10325	0.0354443	0.601351	2.11375	4.08638	0.252287	1.87308	0.316129	2.33736	0.687458	0.545739	0.0999152	0.775342	0.125213	0.0848906	0.0998927	0.110036	0.0331748
4761	NEUROD2	0.308926	0.146969	2.10199	0.0355544	0.602275	0	1.67159	0.643269	1.78562	0.983744	1.22758	0.65328	0.605467	0.324859	0.511354	0.137219	0.114974	0.10905	0.173516	0.0441191
3854	KRT6B	-0.294685	0.140223	-2.10155	0.0355929	0.602275	0	3.57909	0.310648	-1.87576	0.462332	-0.738586	-2.24889	-0.42257	0.118743	-0.342207	-0.460973	0.050751	0.0659644	0.214672	0.0420158
55779	CFAP44	0.346746	0.165012	2.10134	0.0356116	0.602275	0	0.732385	0.865561	0.596475	0.118459	1.16846	1.8474	0.262787	0.0504942	0.513695	0.404139	0.194098	0.181697	0.193278	0.0478565
10296	MAEA	0.50339	0.240028	2.09721	0.0359747	0.607164	42.1254	6.91149	0.074773	0.459821	0.00657619	3.69972	2.27794	0.143611	0.00268997	1.09198	0.615435	0.0975431	0.167319	0.087114	0.0729925
27242	TNFRSF21	0.393013	0.187399	2.09719	0.0359764	0.607164	0	2.88628	0.409493	0.289974	-0.459564	1.62757	2.08332	0.120948	-0.231227	0.692804	0.572164	0.17397	0.253155	0.181192	0.0754275
11000	SLC27A3	-0.334838	0.159743	-2.09611	0.0360726	0.608146	1.71861	4.06995	0.25401	-1.99763	0.168145	-0.571555	-2.42054	-0.544048	0.0485939	-0.157284	-0.633971	0.0741729	0.0835209	0.0757276	0.0685985
9938	ARHGAP25	-0.328105	0.156599	-2.0952	0.0361533	0.608231	6.75968	4.28999	0.231805	-0.053965	-1.78681	0.0336045	-2.98318	-0.0149221	-0.473236	0.0114675	-0.591824	0.0764602	0.0701456	0.116451	0.0393575
375791	CYSRT1	-0.295163	0.140876	-2.0952	0.0361536	0.608231	0	1.79512	0.615997	-0.926357	-1.35625	-1.72806	-0.707959	-0.22692	-0.3624	-0.948456	-0.174833	0.0600051	0.0713994	0.301242	0.0609859
200205	IBA57	0.452444	0.216427	2.09052	0.0365711	0.608916	0	3.86657	0.276237	1.53102	0.588368	2.52161	0.299871	0.652031	0.247148	1.02424	0.0905103	0.181373	0.176447	0.164987	0.0911015
23138	N4BP3	0.391303	0.186868	2.094	0.0362596	0.608916	16.7911	4.80718	0.186473	0.882971	1.71732	-0.737981	3.06103	0.232583	0.429585	-0.392892	0.775397	0.0693842	0.0625741	0.283436	0.0641671
6100	RP9	-0.337752	0.161599	-2.09006	0.036612	0.608916	0	3.67245	0.299075	0.0650356	-0.717793	-1.63855	-2.40203	0.0190228	-0.189531	-0.560019	-0.676561	0.0855551	0.0697204	0.116811	0.0793339
57216	VANGL2	-0.292033	0.139704	-2.09036	0.0365856	0.608916	0	2.12045	0.547787	-1.64988	-1.26804	0.68773	-1.29886	-0.491611	-0.417089	0.381755	-0.247751	0.0887847	0.108191	0.308129	0.0363835
56963	RGMA	0.326379	0.156158	2.09006	0.0366125	0.608916	0	1.05893	0.786998	0.323572	0.866936	0.75787	1.99916	0.104068	0.264094	0.321796	0.515863	0.103441	0.092799	0.18029	0.0665847
8778	SIGLEC5	0.352716	0.16864	2.09154	0.03648	0.608916	0	1.85341	0.603381	0.408517	0.137473	1.69477	1.78043	0.14495	0.0500344	0.60152	0.519797	0.125897	0.132466	0.125974	0.0852352
116135	LRRC3B	-0.264449	0.126484	-2.09077	0.0365483	0.608916	0	0.452012	0.9293	-0.831445	-0.688566	-1.24364	-1.45302	-0.236454	-0.177939	-0.490837	-0.270995	0.0808775	0.0667809	0.15577	0.034784
2547	XRCC6	0.277987	0.132836	2.0927	0.0363757	0.608916	0	3.14191	0.370259	0.009563	0.538979	1.20824	2.45307	0.002249	0.155414	0.391072	0.548646	0.0553083	0.0831447	0.104762	0.0500222
56300	IL36G	0.288433	0.137849	2.09239	0.036404	0.608916	0	3.10213	0.376145	2.06603	0.2105	-0.542943	1.76586	0.523028	0.0536882	-0.287761	0.390988	0.0640882	0.0650508	0.280902	0.0490246
54821	ERCC6L	0.47785	0.228366	2.09248	0.0363957	0.608916	53.2293	8.55236	0.0358744	1.72893	3.0146	2.47112	-0.155511	0.407914	0.720527	1.20728	-0.0336207	0.0556649	0.057127	0.238686	0.0467404
1785	DNM2	0.31169	0.149296	2.08773	0.0368223	0.609842	0	2.37048	0.499153	-0.0819035	2.14671	0.712643	1.26734	-0.0263204	0.635991	0.232573	0.333985	0.103272	0.0877718	0.106506	0.0694492
80207	OPA3	-0.394313	0.188992	-2.0864	0.0369423	0.609842	32.1923	5.89904	0.116627	-3.05034	-1.52149	-0.885533	-0.455008	-0.909272	-0.429795	-0.320546	-0.0803489	0.0888572	0.0797968	0.13103	0.0311832
3757	KCNH2	0.267844	0.1285	2.08439	0.0371251	0.609842	0	0.455833	0.928482	1.14829	0.395301	0.941853	1.56159	0.292275	0.109714	0.389628	0.304502	0.0647858	0.077031	0.171134	0.0380227
10690	FUT9	-0.373	0.17886	-2.08542	0.0370308	0.609842	36.0866	6.25847	0.0996905	-3.05158	0.513762	-1.58659	-1.95813	-0.761095	0.135119	-0.466933	-0.385217	0.0622054	0.0691682	0.0866126	0.0387017
79064	TMEM223	-0.310685	0.14877	-2.08836	0.0367655	0.609842	0	1.9163	0.58996	-1.20296	-0.67564	-2.07986	-0.2194	-0.348579	-0.222641	-0.612842	-0.0619423	0.0839655	0.108587	0.0868222	0.0797078
197	AHSG	0.411381	0.197356	2.08446	0.0371183	0.609842	0	3.9419	0.267807	1.08104	0.596563	-0.120312	2.99385	0.387022	0.238917	-0.0444003	0.823841	0.128171	0.160391	0.136192	0.0757228
1025	CDK9	0.308686	0.147793	2.08864	0.0367401	0.609842	0	1.73276	0.629674	1.32254	0.743957	0.0685771	1.94626	0.374138	0.198702	0.0239502	0.584967	0.0800293	0.0713358	0.121972	0.0903364
29889	GNL2	-0.295412	0.141604	-2.08618	0.0369627	0.609842	0	0.356275	0.949119	-1.56272	-0.781337	-0.276188	-1.2568	-0.382953	-0.237464	-0.114681	-0.30854	0.0600518	0.0923677	0.172414	0.0602689
84107	ZIC4	-0.302767	0.145188	-2.08534	0.0370384	0.609842	0	3.22639	0.358021	-1.17067	-1.73579	0.838042	-1.73255	-0.356475	-0.435691	0.3143	-0.411193	0.0927238	0.0630031	0.140656	0.0563273
1366	CLDN7	0.346189	0.166085	2.08442	0.0371224	0.609842	0	0.711093	0.870592	1.56326	0.611547	1.12451	0.98671	0.543593	0.21932	0.50808	0.252182	0.120917	0.128616	0.204146	0.0653206
1441	CSF3R	0.309401	0.148304	2.08626	0.0369553	0.609842	0	3.17847	0.364918	1.30217	2.21878	1.04276	-0.369528	0.303444	0.636016	0.374824	-0.115568	0.0543031	0.0821691	0.129208	0.097809
25900	IFFO1	-0.269708	0.129286	-2.08614	0.0369658	0.609842	0	1.80688	0.61344	-1.25334	-0.713991	-0.145978	-2.01417	-0.308401	-0.183849	-0.0397487	-0.524596	0.0605467	0.0663037	0.0741427	0.0678354
127703	C1orf216	0.299514	0.143863	2.08194	0.0373479	0.610198	0	2.1078	0.550336	0.14273	0.988199	0.173836	2.32705	0.0477165	0.298178	0.0579756	0.528383	0.111765	0.0910461	0.111227	0.051557
6299	SALL1	-0.332726	0.159771	-2.08252	0.0372949	0.610198	0	3.44958	0.327361	-2.1518	0.275602	-0.590711	-1.88366	-0.616008	0.0770403	-0.266841	-0.469289	0.081954	0.0781395	0.204058	0.0620695
8799	PEX11B	0.245675	0.117911	2.08356	0.0371998	0.610198	0	2.33953	0.50499	2.1334	-0.142069	1.00949	1.04409	0.460564	-0.0350891	0.215255	0.300359	0.0466052	0.0610019	0.0454675	0.0827576
7283	TUBG1	0.305782	0.146901	2.08155	0.0373834	0.610198	0	1.81272	0.612171	1.30668	0.947303	-0.452607	1.82645	0.422997	0.332525	-0.176879	0.388226	0.104794	0.123217	0.152725	0.0451807
64386	MMP25	0.465493	0.22344	2.0833	0.0372236	0.610198	18.5724	4.91234	0.17833	0.169703	0.693997	3.22289	1.24204	0.0677711	0.290473	1.10697	0.330452	0.159481	0.175184	0.117973	0.0707854
10223	GPA33	0.418349	0.201011	2.08122	0.0374135	0.610198	11.6369	4.52677	0.209914	1.4207	-0.576853	1.68584	2.64735	0.442658	-0.204297	0.780194	0.638424	0.0970805	0.125427	0.214177	0.058156
29801	ZDHHC8	-0.295575	0.141975	-2.08188	0.0373534	0.610198	0	0.70895	0.871097	-0.516915	-1.53834	-0.564292	-1.44605	-0.131784	-0.395248	-0.239806	-0.392986	0.0649961	0.0660138	0.180598	0.0738565
125919	ZNF543	-0.339287	0.163139	-2.07973	0.0375498	0.610367	0	2.51524	0.472543	-1.11094	-0.886343	0.706545	-2.07883	-0.341289	-0.346442	0.338879	-0.518329	0.0943768	0.152777	0.230043	0.0621689
1291	COL6A1	-0.287446	0.138206	-2.07983	0.0375413	0.610367	0	0.496768	0.919601	-1.57984	-0.943822	-1.08964	-0.498418	-0.381195	-0.296521	-0.326242	-0.133735	0.0582193	0.0987033	0.0896418	0.0719946
154091	SLC2A12	-0.499067	0.239885	-2.08044	0.0374847	0.610367	47.9548	7.68563	0.0529759	0.0847389	-3.5983	-0.284328	-3.05733	0.023724	-0.890848	-0.137282	-0.789487	0.0783809	0.0612933	0.233123	0.0666814
23473	CAPN7	0.384544	0.184926	2.07945	0.0375763	0.610367	11.4932	4.51943	0.210564	1.39928	-0.496671	1.88813	2.41699	0.46976	-0.148419	0.719672	0.544078	0.112705	0.0892976	0.14528	0.0506727
10468	FST	0.330059	0.158763	2.07895	0.0376223	0.610496	9.56228	4.42293	0.219268	2.97583	1.50702	-0.576379	0.773616	0.650045	0.380239	-0.257479	0.169892	0.0477166	0.063661	0.199558	0.0482273
10495	ENOX2	-0.340102	0.163686	-2.07777	0.0377304	0.611006	31.3604	5.82754	0.120309	-1.45268	-3.08248	-1.20066	-0.117918	-0.32255	-0.711778	-0.429959	-0.0207972	0.0493007	0.0533198	0.128238	0.0311065
25794	FSCN2	0.437859	0.21086	2.07653	0.0378445	0.611006	44.5206	7.20988	0.0655007	4.36224	0.935218	0.194806	1.08243	0.935913	0.20981	0.108888	0.262454	0.0460311	0.0503299	0.312429	0.0587899
4892	NRAP	-0.264828	0.127509	-2.07693	0.0378076	0.611006	0	3.64259	0.302734	-0.97477	-0.042547	-0.0858376	-3.00055	-0.237916	-0.00966939	-0.0319468	-0.501262	0.0595722	0.0516487	0.138516	0.027908
1743	DLST	0.485947	0.233887	2.0777	0.0377368	0.611006	60.9565	10.245	0.0165944	0.542483	0.75087	4.24337	1.97958	0.126169	0.194079	1.24229	0.464062	0.0540922	0.0668075	0.0857088	0.0549551
9213	XPR1	-0.251916	0.121274	-2.07724	0.0377791	0.611006	0	2.38239	0.496921	-0.78179	0.103518	-1.73322	-1.75253	-0.174812	0.0274671	-0.54993	-0.358816	0.049999	0.0704037	0.100671	0.0419192
10268	RAMP3	0.366189	0.176532	2.07435	0.0380466	0.61365	8.23813	4.35911	0.225207	0.515457	3.02854	0.90527	0.61158	0.144801	0.828936	0.401236	0.144675	0.0789145	0.074916	0.196447	0.0559601
10615	SPAG5	0.306956	0.148027	2.07365	0.0381116	0.61408	0	1.43063	0.69837	0.476892	1.22297	1.78351	0.909221	0.156553	0.372047	0.695167	0.208752	0.107766	0.0925478	0.151924	0.0527135
56953	NT5M	-0.538548	0.259818	-2.07279	0.0381916	0.61475	33.283	5.99548	0.111831	-0.782803	-0.171324	-3.70984	-1.22562	-0.340533	-0.0708067	-1.21971	-0.38386	0.18924	0.17081	0.108094	0.0980927
51255	RNF181	0.30735	0.148419	2.07083	0.0383746	0.614894	0	3.76205	0.288331	0.0655296	1.0575	0.49555	2.85581	0.017925	0.311781	0.136173	0.648849	0.0748244	0.0869247	0.0755107	0.0516212
29842	TFCP2L1	-0.538784	0.26001	-2.07217	0.0382495	0.614894	59.2544	9.817	0.0201875	-4.12999	-1.48096	1.00604	-3.39856	-1.09358	-0.418779	0.442094	-0.739127	0.0701143	0.0799616	0.193108	0.0472986
200523	TEX37	-0.282924	0.136595	-2.07127	0.0383337	0.614894	0	0.39797	0.940661	-1.39885	-1.17685	-0.968847	-0.63853	-0.320748	-0.280319	-0.531943	-0.172934	0.0525759	0.0567368	0.301453	0.0733494
84879	MFSD2A	-0.422838	0.204152	-2.07119	0.0383408	0.614894	29.4967	5.67349	0.128623	-2.75661	-1.1673	0.851519	-2.52788	-0.756497	-0.327776	0.356557	-0.634824	0.0753117	0.0788486	0.175335	0.0630659
7531	YWHAE	0.350276	0.169163	2.07064	0.0383925	0.614894	0	0.555989	0.90643	0.263602	1.41166	1.05411	1.29233	0.099369	0.421108	0.41262	0.405755	0.142103	0.0889869	0.153226	0.098578
199731	CADM4	0.50174	0.242401	2.06987	0.0384642	0.615428	48.7336	7.80238	0.0502775	3.29438	2.52276	0.928927	-0.11081	0.936322	0.82574	0.317716	-0.0285956	0.08078	0.107135	0.116981	0.0665945
6230	RPS25	-0.332751	0.161003	-2.06675	0.038758	0.618891	18.5782	4.91269	0.178303	-0.250873	-0.47474	-3.36755	-1.25362	-0.0568815	-0.127588	-0.657525	-0.448606	0.0514082	0.0722288	0.0381239	0.128054
3082	HGF	0.455558	0.220394	2.06702	0.0387327	0.618891	54.3834	8.76874	0.032529	1.68989	0.968329	3.66763	0.5658	0.396309	0.253691	1.32996	0.115585	0.0549984	0.0686379	0.131493	0.041733
84333	PCGF5	-0.339195	0.164208	-2.06564	0.0388623	0.619111	0	0.519931	0.914491	-0.312696	-0.997789	-1.21682	-1.48754	-0.111976	-0.368149	-0.405384	-0.413649	0.128234	0.136135	0.110989	0.0773257
2767	GNA11	0.319384	0.1546	2.06587	0.0388407	0.619111	0	3.58437	0.309984	-0.0630832	1.63178	0.0643774	2.61898	-0.0206493	0.589082	0.0198757	0.519762	0.107148	0.130325	0.0953187	0.0393864
57393	CLTRN	-0.292883	0.141905	-2.06393	0.039024	0.620049	0	2.47243	0.480293	-1.81554	-0.7624	0.815741	-1.47966	-0.462645	-0.192724	0.465585	-0.375343	0.0649361	0.0639007	0.325756	0.0643475
2288	FKBP4	0.314824	0.152511	2.06428	0.0389916	0.620049	0	0.403097	0.939602	1.52583	1.1314	0.920386	0.457169	0.432674	0.303848	0.327671	0.154092	0.08041	0.0721242	0.126746	0.113608
145741	C2CD4A	-0.275376	0.133495	-2.06283	0.0391288	0.620483	0	2.70111	0.440038	-1.85945	0.171895	-0.209287	-1.8508	-0.461292	0.0435387	-0.0960822	-0.418765	0.0615437	0.0641541	0.210767	0.051194
30812	SOX8	0.3723	0.18066	2.06077	0.039325	0.622607	0	2.59159	0.458966	1.28496	-0.281757	0.94032	2.05516	0.495058	-0.0970611	0.555026	0.578861	0.148435	0.11867	0.348398	0.079334
140832	WFDC10A	-0.337178	0.16363	-2.06061	0.0393406	0.622607	0	1.86753	0.600351	-1.75018	-0.972379	0.478196	-1.36979	-0.573692	-0.297453	0.241627	-0.373665	0.107447	0.093576	0.255316	0.0744145
27154	BRPF3	-0.381387	0.1853	-2.05821	0.03957	0.625087	40.9988	6.77952	0.0792672	-1.7225	-4.14221	0.397752	-0.897184	-0.371197	-0.793928	0.142271	-0.234119	0.0464398	0.0367366	0.127941	0.0680941
150709	ANKAR	-0.365678	0.177673	-2.05815	0.0395753	0.625087	2.16153	4.08837	0.252078	-1.49678	0.671493	-0.791822	-2.92136	-0.473847	0.251756	-0.304323	-0.600404	0.100221	0.140565	0.147712	0.0422394
55720	TSR1	-0.292551	0.142213	-2.05712	0.0396744	0.626035	0	2.28061	0.516246	-1.55615	-1.59299	-0.112821	-1.24114	-0.678745	-0.605656	-0.0336077	-0.243403	0.190244	0.144553	0.0887353	0.0384604
79631	EFL1	0.232976	0.11337	2.055	0.0398787	0.627702	0	2.81023	0.421819	0.0201164	0.872613	1.27697	2.15424	0.00404603	0.185538	0.485667	0.439263	0.0404537	0.0452087	0.14465	0.0415776
23094	SIPA1L3	0.352111	0.171326	2.05521	0.0398585	0.627702	0	0.759372	0.859158	1.65727	0.569249	0.999854	0.955492	0.643576	0.206484	0.31529	0.305525	0.150804	0.131573	0.0994367	0.102245
10650	PRELID3A	-0.284521	0.138466	-2.05481	0.0398976	0.627702	0	1.11228	0.774109	-1.64002	-0.271548	-1.03431	-1.22529	-0.43859	-0.0768227	-0.53073	-0.261933	0.0715186	0.0800359	0.263299	0.0456988
5279	PIGC	0.440175	0.21443	2.05277	0.0400945	0.63018	31.0694	5.80293	0.121602	3.21302	-0.411015	1.11481	1.92518	0.782413	-0.120055	0.560916	0.530897	0.0592986	0.0853181	0.253159	0.0760461
219988	PATL1	0.2805	0.136725	2.05156	0.0402124	0.631414	0	0.297188	0.960557	1.32948	0.631715	1.10587	1.05667	0.290747	0.171845	0.414588	0.305592	0.0478261	0.0739999	0.140549	0.0836376
26285	CLDN17	0.287875	0.140357	2.05102	0.0402646	0.631613	0	1.49008	0.684562	0.0259867	1.52347	0.181706	1.82815	0.00754772	0.372213	0.101945	0.419652	0.0843588	0.0596918	0.314768	0.0526935
6658	SOX3	0.279844	0.136515	2.04992	0.0403727	0.632646	0	2.29404	0.513663	-0.195661	1.86909	0.701779	1.57224	-0.0522027	0.469586	0.270391	0.380972	0.0711831	0.0631207	0.148451	0.0587151
26269	FBXO8	-0.311708	0.152087	-2.04954	0.0404094	0.632646	0	3.11826	0.373748	-2.4038	-1.24672	0.236506	-0.400972	-0.617793	-0.414385	0.104065	-0.100427	0.0660528	0.110476	0.193608	0.0627291
9118	INA	-0.473391	0.23113	-2.04816	0.0405444	0.633637	42.167	6.91647	0.0746085	0.273125	-1.39711	-1.83001	-3.48334	0.079196	-0.367911	-0.924217	-0.842284	0.0840786	0.0693469	0.255058	0.058469
9266	CYTH2	0.299294	0.146192	2.04728	0.0406309	0.633637	0	0.937977	0.816255	0.470081	1.37903	0.206586	1.72161	0.136834	0.401371	0.0847007	0.414699	0.0847307	0.0847121	0.168102	0.0580224
7841	MOGS	-0.381361	0.186207	-2.04805	0.0405546	0.633637	1.25516	4.05084	0.256026	-1.44273	0.367608	-2.64186	-0.908356	-0.424787	0.142544	-0.837179	-0.270927	0.0866906	0.150359	0.100419	0.0889594
84872	ZC3H10	-0.310846	0.151823	-2.04742	0.0406165	0.633637	0	0.823844	0.843756	-0.863441	-0.189916	-1.77338	-1.0437	-0.273005	-0.0790235	-0.506381	-0.266475	0.0999716	0.173137	0.0815365	0.0651869
6382	SDC1	0.249206	0.121783	2.04631	0.0407261	0.634373	0	2.7101	0.438513	2.11305	0.896256	1.2505	0.255861	0.528489	0.215975	0.473985	0.0490069	0.0625535	0.0580687	0.143668	0.0366866
8065	CUL5	-0.290482	0.141976	-2.04599	0.0407574	0.634373	0	1.07776	0.782446	-0.350733	-1.26304	-1.62564	-0.950175	-0.100018	-0.36734	-0.522095	-0.239075	0.0813208	0.084586	0.103145	0.0633082
79853	TM4SF20	-0.271729	0.132903	-2.04457	0.0408969	0.635928	0	3.27516	0.351114	-2.32606	0.023498	-1.14173	-1.07473	-0.535161	0.00527694	-0.62032	-0.2333	0.052933	0.0504316	0.295191	0.047123
10120	ACTR1B	0.321746	0.157412	2.04398	0.040956	0.636228	3.50648	4.14536	0.24619	2.39647	1.25486	-0.709581	1.64686	0.575302	0.32045	-0.232323	0.432446	0.0576301	0.0652124	0.107197	0.0689524
160428	ALDH1L2	-0.337298	0.165184	-2.04195	0.0411562	0.638718	3.91777	4.1631	0.244382	-2.8017	-0.11766	-1.52184	-0.349	-0.670693	-0.0349268	-0.52462	-0.0909782	0.0573065	0.0881178	0.118836	0.0679554
54555	DDX49	0.323733	0.158599	2.04121	0.0412304	0.639252	0	1.02542	0.795102	0.13301	1.5636	0.844718	1.41981	0.046121	0.500998	0.285276	0.394844	0.120233	0.102665	0.114053	0.0773376
26275	HIBCH	0.273811	0.134352	2.03801	0.0415489	0.639507	0	3.1737	0.365611	0.644869	-0.225908	2.21239	1.49229	0.161531	-0.0653795	0.608673	0.355563	0.0627438	0.0837567	0.0756913	0.0567712
121642	ALKBH2	0.317485	0.155636	2.03992	0.0413583	0.639507	0	1.58978	0.66171	1.86451	0.305965	1.31401	0.674113	0.545971	0.103468	0.532477	0.175303	0.0857453	0.114359	0.164213	0.0676259
85462	FHDC1	0.418076	0.20515	2.0379	0.0415602	0.639507	0	1.05488	0.787976	1.30335	1.15936	1.37482	0.524333	0.570766	0.533076	0.673232	0.168826	0.191774	0.211418	0.239794	0.103672
51529	ANAPC11	0.323117	0.15856	2.03783	0.0415671	0.639507	20.676	5.04261	0.168703	1.20282	-0.316257	1.06049	3.38212	0.267004	-0.08274	0.382733	0.618942	0.049276	0.0684464	0.130249	0.0334905
4852	NPY	-0.323794	0.158866	-2.03816	0.0415337	0.639507	0	3.81993	0.281577	-1.79122	-1.40077	-1.96338	0.141668	-0.45855	-0.318612	-0.961899	0.0376381	0.065535	0.0517356	0.240021	0.0705847
414899	BLID	-0.278394	0.136514	-2.03931	0.0414187	0.639507	0	0.51093	0.916484	-0.744048	-0.80064	-1.2234	-1.40655	-0.195515	-0.221319	-0.540083	-0.307234	0.0690493	0.0764124	0.194887	0.0477119
353345	GPR141	0.352417	0.172757	2.03996	0.0413543	0.639507	0	1.41122	0.702907	1.01525	0.582005	1.82416	0.935749	0.335172	0.217295	0.867844	0.262171	0.108991	0.139395	0.226338	0.0784966
25834	MGAT4C	-0.311536	0.152906	-2.03744	0.0416063	0.639507	0	3.64775	0.302099	-1.12877	-2.26544	0.945674	-1.42795	-0.319477	-0.537631	0.415001	-0.332834	0.0801068	0.0563203	0.192582	0.0543289
26095	PTPN20	0.249696	0.122457	2.03905	0.0414451	0.639507	0	3.27395	0.351284	0.371805	0.0793291	-0.0496212	2.91118	0.0996572	0.0187638	-0.0242539	0.453008	0.0718434	0.0559467	0.238907	0.0242143
8425	LTBP4	0.289301	0.14211	2.03575	0.0417752	0.641487	0	0.730758	0.865947	0.894319	1.51383	0.127139	1.32943	0.264733	0.434855	0.0457365	0.311128	0.0876254	0.0825153	0.129409	0.0547704
1400	CRMP1	-0.240928	0.118454	-2.03394	0.0419575	0.643219	0	0.78529	0.852982	-1.29333	-1.01226	0.397749	-1.43758	-0.274985	-0.235192	0.211153	-0.276273	0.0452064	0.053983	0.281823	0.036933
3782	KCNN3	0.315717	0.155232	2.03383	0.0419683	0.643219	0	3.81394	0.282269	1.11378	2.73533	0.277696	0.472579	0.303234	0.758823	0.104931	0.103026	0.0741234	0.0769593	0.142781	0.0475279
440603	BCL2L15	0.42914	0.211186	2.03205	0.0421485	0.643448	17.161	4.82864	0.184783	0.546626	3.22785	0.832971	0.597375	0.187172	0.946632	0.451375	0.150752	0.117247	0.0860075	0.29364	0.0636845
2815	GP9	-0.354874	0.174702	-2.0313	0.0422243	0.643448	0	3.03745	0.385887	-0.122555	-0.446796	-2.41953	-1.07146	-0.0445465	-0.157186	-0.851804	-0.348352	0.132119	0.123768	0.123942	0.105704
402415	XKRX	0.318163	0.156517	2.03277	0.042076	0.643448	0	0.913209	0.822239	0.394517	1.06052	1.00233	1.66143	0.111373	0.338027	0.577991	0.423069	0.0796945	0.101593	0.332523	0.0648424
163351	GBP6	-0.321538	0.158152	-2.03309	0.0420432	0.643448	0	3.12593	0.372614	0.509276	-1.14052	-0.866026	-2.2982	0.163323	-0.39326	-0.404431	-0.519258	0.102846	0.118894	0.218086	0.0510493
79868	ALG13	0.557348	0.274376	2.03133	0.042222	0.643448	54.4759	8.78656	0.0322675	0.266242	1.3594	4.21433	1.1591	0.10474	0.496998	1.32736	0.272252	0.154765	0.133664	0.0992017	0.0551696
55388	MCM10	0.322261	0.158556	2.03247	0.0421056	0.643448	0	1.69194	0.638726	-0.2477	1.07661	1.27219	1.72742	-0.091378	0.368379	0.574541	0.396455	0.136092	0.117077	0.203956	0.0526732
23704	KCNE4	-0.268323	0.132201	-2.02965	0.0423917	0.645092	0	1.04792	0.789658	-0.650011	-1.94325	-0.147917	-0.973048	-0.171889	-0.431151	-0.0522798	-0.254677	0.0699287	0.049227	0.12492	0.0685031
10856	RUVBL2	0.421514	0.207699	2.02945	0.0424127	0.645092	39.234	6.58263	0.0864602	3.19829	1.09272	-0.781341	2.61269	0.715352	0.327548	-0.276284	0.69239	0.0500271	0.0898533	0.125035	0.0702302
81844	TRIM56	0.352658	0.173955	2.02729	0.0426323	0.645441	5.86061	4.24902	0.2358	-0.106399	0.709326	2.49144	1.78372	-0.0274865	0.247701	0.751739	0.488729	0.0667361	0.121945	0.0910399	0.0750725
84173	ELMOD3	0.313788	0.154722	2.02808	0.0425519	0.645441	0	1.1308	0.769645	1.44044	1.64976	0.629944	0.22476	0.484092	0.439458	0.204296	0.0736294	0.112945	0.070957	0.105175	0.107316
23195	MDN1	0.308255	0.15197	2.0284	0.0425194	0.645441	0	1.76309	0.622999	0.718069	0.210775	0.113214	2.30318	0.265757	0.0957971	0.0357343	0.501157	0.136974	0.206569	0.0996255	0.047347
89944	GLB1L2	-0.436996	0.215552	-2.02733	0.0426282	0.645441	39.772	6.64143	0.0842487	0.159733	-1.29599	-1.42845	-3.48804	0.0450356	-0.349095	-0.486422	-0.95681	0.0794914	0.0725575	0.115957	0.0752471
10863	ADAM28	-0.271638	0.134042	-2.02651	0.0427128	0.645496	0	1.60724	0.65775	-1.13261	-1.42022	0.328552	-1.51861	-0.317613	-0.474574	0.116779	-0.297432	0.0786382	0.11166	0.126335	0.0383602
11264	PXMP4	-0.389464	0.192416	-2.02407	0.0429632	0.645496	28.0508	5.55948	0.135124	-1.10262	-2.26343	-2.32064	0.127259	-0.348303	-0.658881	-0.739276	0.0280474	0.0997841	0.0847381	0.101484	0.0485744
5791	PTPRE	0.297328	0.146852	2.02468	0.0429007	0.645496	0	3.46205	0.325717	0.295077	-0.0899797	1.28843	2.61364	0.0794183	-0.027495	0.445422	0.559042	0.0724386	0.0933722	0.119515	0.0457508
25973	PARS2	-0.288276	0.142424	-2.02407	0.0429629	0.645496	0	0.248081	0.969478	-1.12089	-1.2406	-1.01961	-0.714053	-0.317873	-0.350541	-0.336733	-0.183326	0.080424	0.0798393	0.109069	0.0659154
79595	SAP130	0.258276	0.127527	2.02526	0.0428409	0.645496	0	1.71297	0.634055	1.01986	0.861596	0.141041	2.00307	0.221145	0.189077	0.0507337	0.584936	0.0470185	0.0481579	0.129391	0.0852757
10645	CAMKK2	0.337493	0.166553	2.02635	0.0427293	0.645496	0	2.68379	0.442989	-0.206594	-0.0570914	1.68633	1.97489	-0.0850799	-0.0241584	0.469599	0.578035	0.169597	0.179058	0.0775475	0.0856685
150771	ITPRIPL1	-0.306809	0.151578	-2.0241	0.04296	0.645496	13.3339	4.61542	0.202224	-0.697904	-0.202698	-0.638088	-3.46478	-0.146169	-0.0501583	-0.31277	-0.613705	0.0438653	0.0612333	0.240264	0.0313738
23384	SPECC1L	0.350383	0.173053	2.02472	0.0428966	0.645496	28.3815	5.58515	0.133633	-0.326546	1.31111	2.37596	2.25865	-0.0766737	0.310347	0.779241	0.524667	0.0551322	0.056029	0.107563	0.0539599
8898	MTMR2	0.308536	0.152628	2.02149	0.0432289	0.648879	13.9261	4.64717	0.199533	2.25808	-0.023946	2.23017	0.703687	0.525832	-0.00559892	0.685856	0.155687	0.0542268	0.0546695	0.0945778	0.0489494
85289	KRTAP4-5	0.28088	0.139082	2.01952	0.0434331	0.648905	0	1.64302	0.649676	0.768192	0.51479	0.622825	2.11623	0.185273	0.127203	0.330078	0.554494	0.0581679	0.0610572	0.280867	0.0686541
9381	OTOF	0.396541	0.19622	2.0209	0.0432899	0.648905	54.5608	8.80297	0.0320285	0.741387	1.0167	0.620851	5.01363	0.179078	0.254334	0.163966	0.866889	0.058344	0.0625783	0.069748	0.0298966
1959	EGR2	0.393814	0.195042	2.01913	0.0434737	0.648905	0	1.61639	0.65568	-0.327781	0.796646	1.17194	1.89149	-0.160518	0.413817	0.637403	0.48788	0.239818	0.269827	0.295814	0.0665297
375444	C5orf34	0.267951	0.132697	2.01927	0.0434592	0.648905	0	1.34527	0.718412	0.237385	1.36855	1.31682	1.32643	0.0632721	0.380571	0.643584	0.262174	0.0710425	0.07733	0.238867	0.0390673
10324	KLHL41	0.262315	0.129884	2.01961	0.0434244	0.648905	0	3.49422	0.321512	0.470363	2.11931	-0.638053	1.88179	0.111173	0.464913	-0.228091	0.383935	0.0558643	0.0481231	0.127792	0.0416269
1104	RCC1	0.25875	0.1281	2.01991	0.043393	0.648905	0	2.4358	0.487005	0.0920843	1.06041	2.7599e-05	2.3201	0.0238574	0.28267	9.95984e-06	0.47075	0.0671235	0.0710574	0.130232	0.0411687
126006	PCP2	-0.308185	0.15268	-2.01851	0.0435386	0.649268	0	0.839386	0.840025	-1.51805	-0.352948	-1.06478	-1.1623	-0.492614	-0.116631	-0.478576	-0.264613	0.105303	0.109196	0.202014	0.0518308
55219	MACO1	0.325597	0.161492	2.01619	0.0437804	0.650451	0	3.10284	0.37604	1.66617	1.01679	1.85527	-0.0736691	0.542169	0.329288	0.706945	-0.0197563	0.105884	0.104879	0.145197	0.0719186
124454	EARS2	-0.318184	0.157785	-2.01656	0.0437412	0.650451	0	2.3217	0.508377	0.0289839	-0.928204	-0.65148	-2.25863	0.0092721	-0.321791	-0.221633	-0.616211	0.102339	0.120188	0.115736	0.0744339
7041	TGFB1I1	-0.283306	0.140504	-2.01636	0.0437621	0.650451	0	2.04147	0.563843	-1.04603	0.227377	-1.43175	-1.70629	-0.30348	0.0705759	-0.629872	-0.354032	0.0841727	0.0963427	0.193541	0.0430508
284353	NKPD1	0.269422	0.133601	2.01662	0.0437353	0.650451	0	1.77169	0.621115	0.530848	0.71105	1.84057	1.28971	0.155535	0.178148	0.798793	0.268131	0.0858449	0.062771	0.188349	0.0432227
7291	TWIST1	0.447427	0.222118	2.01437	0.0439709	0.652072	27.4045	5.50998	0.138043	1.9258	0.916728	2.74225	0.113624	0.529331	0.280259	1.32368	0.0342033	0.0755494	0.093463	0.232998	0.0906137
81786	TRIM7	-0.236156	0.11722	-2.01463	0.0439432	0.652072	0	1.66916	0.643812	-2.03527	-0.224347	-0.902716	-0.848727	-0.440808	-0.0574637	-0.358065	-0.155316	0.0469088	0.0656064	0.157333	0.0334887
4140	MARK3	0.290749	0.144379	2.01379	0.0440317	0.65237	0	2.91716	0.404575	1.27727	2.22153	0.601997	-0.20857	0.32604	0.622503	0.209709	-0.0611086	0.0651594	0.07852	0.121352	0.0858418
10267	RAMP1	-0.312677	0.155384	-2.0123	0.0441888	0.653873	0	1.44335	0.695405	-0.583419	0.0985798	-1.54229	-1.66251	-0.17824	0.0444047	-0.593161	-0.381254	0.0933364	0.2029	0.147915	0.0525901
9114	ATP6V0D1	0.325861	0.161955	2.01205	0.0442148	0.653873	2.57479	4.10571	0.250273	0.912757	2.86057	1.01719	-0.184707	0.239505	0.693381	0.329979	-0.0537069	0.0688526	0.0587542	0.105237	0.0845459
668	FOXL2	0.218237	0.108522	2.01099	0.044327	0.654132	0	2.09211	0.55351	0.426677	2.2783	-0.268494	0.83149	0.0899282	0.40697	-0.130245	0.160588	0.0444215	0.0319082	0.235315	0.0373004
8662	EIF3B	0.263097	0.130961	2.00896	0.0445409	0.654132	0	0.914776	0.821861	1.19519	1.67612	0.711231	0.454984	0.26273	0.470083	0.241623	0.112925	0.0483221	0.0786573	0.115413	0.0616006
912	CD1D	-0.331082	0.164763	-2.00944	0.0444901	0.654132	0	3.69387	0.296475	-1.10686	-1.19532	0.929954	-2.45185	-0.325926	-0.341502	0.433698	-0.563404	0.0867073	0.0816241	0.217496	0.0528021
7122	CLDN5	-0.36891	0.183593	-2.00939	0.0444953	0.654132	0	2.075	0.556986	-0.379106	-0.459435	-2.15131	-1.06289	-0.158365	-0.2038	-0.89842	-0.293425	0.174502	0.19677	0.174403	0.0762105
6297	SALL2	-0.317049	0.157684	-2.01066	0.0443618	0.654132	0	2.81685	0.420733	-0.617446	0.413696	-1.1308	-2.24243	-0.20232	0.147083	-0.481227	-0.536476	0.10737	0.126405	0.181104	0.0572351
5096	PCCB	0.3199	0.159223	2.00913	0.0445237	0.654132	2.6231	4.10775	0.250062	2.52778	0.330841	1.84936	-0.0511979	0.595933	0.0861468	0.568304	-0.0151655	0.0555796	0.0678015	0.0944321	0.0877424
54987	C1orf123	0.266777	0.132662	2.01095	0.0443304	0.654132	0	1.15719	0.763288	1.06514	1.53002	1.28756	0.260431	0.269699	0.382206	0.440406	0.0638222	0.0641128	0.0624022	0.116996	0.0600562
22998	LIMCH1	0.28931	0.144049	2.00841	0.0445999	0.654132	0	2.5365	0.46873	0.366732	1.3506	-0.255415	2.13222	0.101031	0.358948	-0.102626	0.556802	0.0758946	0.0706338	0.161443	0.0681925
9573	GDF3	0.308543	0.153625	2.00841	0.0445999	0.654132	0	0.598288	0.896824	1.67521	0.754664	0.187279	1.10503	0.479761	0.215002	0.106399	0.287622	0.082019	0.0811664	0.32277	0.0677478
55215	FANCI	0.381188	0.190268	2.00343	0.0451315	0.654792	0	3.67639	0.298595	-0.606459	0.782855	2.16678	1.84557	-0.246026	0.321501	0.743395	0.484622	0.164574	0.168656	0.117709	0.0689521
670	BPHL	0.274373	0.136859	2.00478	0.0449866	0.654792	0	1.59451	0.660635	1.91318	0.0946489	0.644354	1.23663	0.480341	0.0259489	0.200961	0.331215	0.063036	0.0751635	0.0972692	0.0717364
8874	ARHGEF7	-0.285021	0.142334	-2.00248	0.0452334	0.654792	15.2125	4.71768	0.193676	-1.11415	-3.11383	0.108295	-0.796133	-0.248998	-0.661218	0.0342231	-0.148499	0.0499464	0.0450921	0.0998668	0.0347915
56910	STARD7	0.339161	0.168981	2.0071	0.0447394	0.654792	19.8717	4.99199	0.172384	2.18965	-0.369635	2.75164	0.464523	0.542254	-0.138707	0.642396	0.106526	0.0613277	0.140816	0.0545031	0.0525892
144124	OR10A5	0.352425	0.175674	2.00613	0.0448423	0.654792	37.559	6.40604	0.0934425	3.8659	0.543035	0.562259	0.959577	0.786845	0.114127	0.224425	0.204944	0.0414263	0.0441693	0.15932	0.0456152
1432	MAPK14	0.294896	0.147176	2.0037	0.0451027	0.654792	0	2.39714	0.494166	1.45117	-0.0746881	1.90027	0.830316	0.401012	-0.0239523	0.677713	0.211	0.0763616	0.102847	0.127192	0.064577
284307	ZIK1	0.288928	0.144076	2.00538	0.044922	0.654792	0	2.28306	0.515774	1.84885	0.113823	1.61711	0.508312	0.536638	0.0398184	0.518559	0.118473	0.0842484	0.12238	0.102829	0.0543222
79937	CNTNAP3	0.374173	0.186909	2.00191	0.0452949	0.654792	0	2.48472	0.478059	0.676114	-0.478386	0.450191	2.36721	0.287385	-0.222073	0.279346	0.594558	0.18067	0.215493	0.385028	0.0630833
64343	AZI2	-0.296594	0.148128	-2.00229	0.0452541	0.654792	0	1.64017	0.650317	-1.50276	-0.587125	0.0331699	-1.74505	-0.453649	-0.226738	0.0099102	-0.427103	0.0911293	0.149138	0.0892639	0.0599031
148423	C1orf52	-0.245792	0.122742	-2.00251	0.0452296	0.654792	0	2.11268	0.549353	0.244566	-1.23343	-1.68753	-1.30147	0.0606503	-0.310327	-0.402924	-0.317736	0.0614999	0.0633005	0.0570092	0.0596031
10868	USP20	-0.410216	0.204828	-2.00273	0.0452063	0.654792	46.8498	7.52585	0.056898	-2.20115	-0.208705	-3.35809	-0.527529	-0.566146	-0.0562455	-0.972687	-0.117981	0.0661545	0.072629	0.0839	0.0500187
9718	ECE2	-0.447902	0.223293	-2.0059	0.0448673	0.654792	61.7252	10.4507	0.0150988	-1.10079	-1.36246	-4.23478	-0.537732	-0.257408	-0.316895	-1.22082	-0.113296	0.0546807	0.0540985	0.0831078	0.0443909
11279	KLF8	0.34146	0.170347	2.0045	0.0450162	0.654792	0	0.472756	0.924835	1.11681	1.46431	0.77673	0.70429	0.370158	0.486125	0.406838	0.198097	0.109855	0.110213	0.274348	0.0791136
53981	CPSF2	0.257381	0.128571	2.00187	0.045299	0.654792	0	2.4854	0.477935	0.590889	0.645795	2.17224	1.00401	0.144229	0.160932	0.773692	0.226067	0.0595792	0.0621003	0.126859	0.0506986
10100	TSPAN2	0.34728	0.173067	2.00663	0.0447895	0.654792	0	2.62292	0.453486	-0.484005	0.330775	1.87689	1.66826	-0.228629	0.160965	0.722853	0.393864	0.223134	0.236808	0.148328	0.05574
50848	F11R	0.291918	0.145606	2.00486	0.0449785	0.654792	0	1.01799	0.7969	0.832485	0.0750957	1.06007	1.79304	0.342275	0.0282874	0.239423	0.469251	0.169043	0.141892	0.0510106	0.0684903
43849	KLK12	0.274744	0.137329	2.00062	0.0454335	0.656144	0	3.86927	0.275931	2.51576	1.68981	-0.0596289	0.231698	0.534224	0.422676	-0.0234445	0.0443172	0.045093	0.062566	0.154585	0.0365846
7486	WRN	0.301796	0.150935	1.99952	0.0455526	0.65668	0	1.37215	0.712076	0.266814	1.83062	1.20343	0.70683	0.0807544	0.52936	0.406911	0.201757	0.0916044	0.083619	0.11433	0.0814754
51302	CYP39A1	-0.310786	0.155429	-1.99954	0.0455498	0.65668	16.693	4.80152	0.186922	-1.07258	-1.57814	0.702289	-2.92383	-0.250787	-0.381488	0.229833	-0.598499	0.0546704	0.0584346	0.107101	0.0419009
80223	RAB11FIP1	-0.278536	0.13935	-1.99883	0.0456265	0.656743	0	1.4917	0.684188	-1.91179	-0.625346	-0.0582388	-1.19902	-0.478541	-0.177617	-0.0182651	-0.332868	0.0626553	0.0806731	0.0983597	0.0770714
26353	HSPB8	-0.254691	0.127511	-1.99741	0.045781	0.658194	0	2.98905	0.393316	-1.69556	-1.93788	-0.526959	0.265891	-0.374213	-0.479394	-0.214432	0.0616609	0.0487094	0.0611971	0.165587	0.053779
29104	N6AMT1	0.282884	0.141678	1.99667	0.0458609	0.658752	0	1.05023	0.7891	0.452238	0.413926	1.18777	1.80285	0.127828	0.126816	0.43372	0.411988	0.0798942	0.0938643	0.133337	0.0522217
1488	CTBP2	0.264779	0.132883	1.99258	0.046308	0.659002	0	0.412459	0.937657	1.17247	0.640141	0.494015	1.53437	0.349582	0.216317	0.133106	0.320979	0.0888986	0.11419	0.0725969	0.0437615
176	ACAN	0.258138	0.129444	1.9942	0.0461297	0.659002	0	2.09219	0.553495	0.686993	2.26258	0.254681	0.642624	0.168514	0.564257	0.0926967	0.145775	0.0601684	0.0621937	0.132476	0.0514575
51608	GET4	0.344294	0.172609	1.99464	0.0460818	0.659002	14.0737	4.65515	0.198862	3.16582	0.282043	0.199684	1.24494	0.803405	0.118882	0.0611184	0.246719	0.0644014	0.177664	0.0936825	0.0392739
3434	IFIT1	-0.351247	0.176246	-1.99294	0.0462683	0.659002	0	2.29807	0.51289	0.368632	-0.549088	-0.325336	-2.39304	0.173093	-0.259446	-0.14551	-0.561254	0.220481	0.22326	0.200042	0.0550072
7385	UQCRC2	0.29845	0.14956	1.99553	0.0459855	0.659002	0	2.10759	0.55038	0.480046	0.486157	2.18858	0.912704	0.131538	0.173684	0.700084	0.245869	0.0750822	0.127635	0.102323	0.0725686
203190	LGI3	-0.347272	0.174175	-1.99382	0.0461722	0.659002	33.6467	6.02834	0.11024	-1.5981	-0.376251	-3.13214	-0.586847	-0.383512	-0.0808211	-0.922195	-0.142407	0.0575904	0.0461418	0.0866886	0.0588859
9994	CASP8AP2	0.340181	0.170765	1.9921	0.0463596	0.659002	5.0284	4.21179	0.239485	1.68605	1.26496	2.17488	-0.00995348	0.422406	0.385553	0.939951	-0.00230113	0.0627652	0.0929001	0.186783	0.0534482
78997	GDAP1L1	-0.41508	0.20831	-1.99261	0.0463047	0.659002	24.2493	5.28048	0.152374	-3.04233	0.13186	-1.09352	-1.36158	-0.906536	0.038208	-0.516682	-0.346869	0.0887884	0.083962	0.223251	0.0649
2741	GLRA1	0.326784	0.163954	1.99314	0.0462461	0.659002	0	2.02188	0.567878	1.6854	1.66826	-0.225268	0.565762	0.514179	0.546575	-0.106793	0.158811	0.0930729	0.107343	0.224745	0.0787944
27035	NOX1	-0.318571	0.159926	-1.99199	0.0463721	0.659002	26.2804	5.42596	0.143135	-3.25999	-1.04782	-0.267166	-0.797667	-0.782837	-0.245977	-0.0984036	-0.13198	0.0576649	0.0551077	0.135662	0.027376
29944	PNMA3	0.387574	0.194476	1.99292	0.0462703	0.659002	0	0.553009	0.907101	0.562091	1.15262	1.41151	0.942278	0.267984	0.536749	0.592394	0.274863	0.227302	0.216854	0.176139	0.0850895
3250	HPR	0.288015	0.144419	1.9943	0.0461195	0.659002	0	0.793453	0.851032	0.768626	0.375487	1.08423	1.69214	0.253246	0.107237	0.563142	0.354639	0.108556	0.0815649	0.26977	0.0439238
84962	AJUBA	-0.215108	0.108037	-1.99106	0.0464746	0.659389	0	2.46216	0.482169	-1.38823	0.164859	-1.50406	-1.48658	-0.28207	0.0350091	-0.582336	-0.260335	0.041285	0.0450957	0.149904	0.0306683
94039	ZNF101	-0.305535	0.153459	-1.99099	0.0464816	0.659389	4.2262	4.17651	0.243024	0.594844	-1.54891	-1.54651	-2.16297	0.158529	-0.414177	-0.408305	-0.527516	0.0710253	0.0715021	0.0697051	0.0594802
2843	GPR20	0.450627	0.226419	1.99024	0.0465648	0.659983	40.5987	6.73386	0.0808821	1.70482	3.44124	0.405354	0.401122	0.561901	1.01745	0.149573	0.0941116	0.108634	0.0874174	0.136156	0.0550469
79607	FAM118B	0.443239	0.222798	1.98942	0.0466553	0.660681	45.5521	7.34647	0.0616374	-0.570493	1.15722	3.13485	2.57687	-0.162504	0.396434	0.817204	0.671566	0.0811389	0.117358	0.067956	0.0679193
8573	CASK	-0.302594	0.152228	-1.98777	0.0468374	0.662512	0	2.72729	0.435609	-0.557796	-1.99008	0.216129	-1.53631	-0.188327	-0.795812	0.0800434	-0.336567	0.113992	0.159911	0.137159	0.0479939
91544	UBXN11	0.492315	0.247848	1.98636	0.0469931	0.662512	68.6261	12.7495	0.00521096	1.35293	4.66194	-0.951168	3.86117	0.31496	1.013	-0.335975	0.753118	0.0541954	0.0472156	0.124767	0.0380441
256281	NUDT14	0.309466	0.1558	1.98629	0.0470006	0.662512	0	2.21429	0.52914	0.126336	1.83229	0.228542	1.65353	0.0375695	0.575816	0.0857873	0.464616	0.0884332	0.0987598	0.1409	0.0789519
84335	AKT1S1	0.327229	0.164751	1.9862	0.0470111	0.662512	0	0.284838	0.962854	0.887563	1.19716	0.388363	1.3631	0.316329	0.465816	0.162177	0.334261	0.127022	0.1514	0.174382	0.0601332
83642	SELENOO	0.400932	0.201954	1.98526	0.0471154	0.662512	12.3861	4.56549	0.206523	0.296855	2.80452	-0.120899	1.79605	0.0904056	0.832683	-0.0506942	0.560406	0.0927478	0.088154	0.175821	0.0973574
5236	PGM1	0.414851	0.208909	1.9858	0.0470557	0.662512	50.7261	8.11789	0.0436371	-0.00650373	0.755793	3.76393	2.03035	-0.00150014	0.212174	0.896703	0.549546	0.0532032	0.0788096	0.0567562	0.0732599
3306	HSPA2	-0.448281	0.225762	-1.98564	0.0470737	0.662512	44.6895	7.2319	0.0648624	-1.53574	0.0131552	-0.513876	-4.64322	-0.443958	0.00402278	-0.221565	-0.897914	0.0835696	0.0935096	0.185903	0.0373965
9590	AKAP12	-0.227429	0.114612	-1.98433	0.0472189	0.663384	0	0.872547	0.832047	-1.66778	-0.527448	0.016409	-1.32293	-0.364135	-0.117901	0.00793536	-0.238145	0.0476701	0.0499659	0.233866	0.0324047
53371	NUP54	-0.279176	0.140746	-1.98354	0.0473071	0.664041	0	2.22857	0.526342	-2.18531	-0.893872	0.250588	-0.725001	-0.540252	-0.263919	0.0957573	-0.182398	0.0611178	0.0871745	0.146023	0.0632938
286133	SCARA5	0.281389	0.141889	1.98317	0.0473487	0.664043	0	3.0143	0.389425	0.166365	0.89023	-0.0769781	2.4804	0.0484495	0.258987	-0.0274229	0.577432	0.0848114	0.0846349	0.12691	0.0541948
27101	CACYBP	0.250313	0.126344	1.9812	0.0475683	0.665705	0	2.96457	0.397119	0.834728	0.150425	0.349377	2.45933	0.188955	0.0441259	0.091845	0.595787	0.0512423	0.0860498	0.0691071	0.0586881
2327	FMO2	0.355296	0.179352	1.98099	0.0475919	0.665705	0	3.0363	0.386063	2.32052	0.332695	-0.0446912	1.23196	0.848329	0.111527	-0.0203559	0.383944	0.133646	0.112373	0.20746	0.0971283
7097	TLR2	-0.293378	0.148043	-1.98171	0.0475116	0.665705	0	0.891714	0.827427	-1.05387	-1.06926	-0.354191	-1.56188	-0.388233	-0.40464	-0.0920128	-0.384995	0.13571	0.143208	0.0674871	0.0607596
6156	RPL30	0.254948	0.128772	1.97984	0.0477216	0.666936	0	2.86291	0.413248	0.193402	-0.0538751	2.49037	0.735128	0.0502664	-0.0161819	0.490095	0.250728	0.0675515	0.0902156	0.0387286	0.116326
1395	CRHR2	0.248476	0.125571	1.97877	0.0478415	0.668029	0	2.59039	0.459178	1.97451	1.6134	0.0336187	0.0552026	0.493079	0.345902	0.014927	0.0121757	0.0623609	0.0459647	0.197144	0.0486485
131920	TMEM207	0.34903	0.176539	1.97707	0.0480336	0.670127	0	2.10673	0.550553	1.87774	-0.101764	0.985447	1.22808	0.684825	-0.0363244	0.505221	0.341726	0.133011	0.127412	0.262843	0.0774292
55486	PARL	0.33402	0.169	1.97646	0.0481032	0.670515	39.5999	6.6225	0.0849545	2.24204	0.58823	2.91893	0.272682	0.424696	0.113931	0.993557	0.0615734	0.0358814	0.0375134	0.115861	0.0509887
2542	SLC37A4	0.29901	0.151316	1.97607	0.0481471	0.670543	0	0.85826	0.835487	0.343444	0.985685	1.04849	1.60445	0.101071	0.277075	0.364719	0.479242	0.0866045	0.0790168	0.121002	0.0892194
8832	CD84	0.341551	0.172959	1.97475	0.0482963	0.671453	3.00033	4.12373	0.24841	0.0523779	2.17582	-0.0420763	2.38544	0.0184131	0.755862	-0.01316	0.502522	0.123582	0.120681	0.0978222	0.0443785
128344	PIFO	0.31607	0.160027	1.97511	0.0482561	0.671453	0	0.695283	0.874313	1.27305	0.611303	-0.0945701	1.61029	0.418234	0.20354	-0.0549457	0.381658	0.107931	0.110863	0.337567	0.0561746
6546	SLC8A1	0.309652	0.156918	1.97333	0.0484574	0.671661	0	0.112389	0.99031	0.851771	1.14699	0.671965	1.23036	0.292213	0.399082	0.236153	0.309942	0.117693	0.12106	0.123507	0.0634591
10849	CD3EAP	0.310326	0.157201	1.97407	0.0483739	0.671661	0	1.36732	0.713213	1.08386	1.02106	-0.288078	1.72161	0.358257	0.358499	-0.115315	0.418046	0.109255	0.123273	0.160232	0.0589627
140609	NEK7	0.387498	0.196364	1.97336	0.0484542	0.671661	0	2.73593	0.434155	0.98636	-0.703465	1.21904	1.91736	0.471147	-0.343676	0.644352	0.516463	0.228161	0.238678	0.279389	0.0725556
146894	CD300LG	-0.27914	0.141469	-1.97315	0.048479	0.671661	0	0.402958	0.939631	-0.856377	-0.239715	-0.950781	-1.6129	-0.279569	-0.0830499	-0.334601	-0.328022	0.106573	0.120029	0.12385	0.0413613
909	CD1A	-0.41293	0.209397	-1.97199	0.0486108	0.672904	15.7558	4.7481	0.191199	-0.158165	-1.62872	-2.76116	-0.490494	-0.0510723	-0.520102	-1.03304	-0.157025	0.104268	0.101972	0.139975	0.102487
56894	AGPAT3	0.350163	0.177881	1.96852	0.0490084	0.673274	7.7632	4.33666	0.22733	1.59273	-0.132145	0.129221	2.93104	0.483134	-0.0560928	0.0360202	0.675394	0.0920136	0.180184	0.0777007	0.0530969
5522	PPP2R2C	0.192895	0.0978671	1.97099	0.0487247	0.673274	0	2.10936	0.550022	1.23288	2.06493	0.199356	0.412919	0.24517	0.401833	0.0654352	0.0626569	0.0395454	0.0378687	0.107737	0.0230255
5101	PCDH9	-0.275523	0.139798	-1.97087	0.0487383	0.673274	0.593951	4.0239	0.258895	-1.50018	-1.23617	1.19545	-2.31013	-0.326689	-0.291493	0.524072	-0.427431	0.0474226	0.0556031	0.192184	0.0342342
5447	POR	0.424147	0.2153	1.97003	0.0488352	0.673274	16.3489	4.78177	0.188493	1.19694	2.28442	-1.10678	2.21728	0.381359	0.694462	-0.607301	0.625766	0.101512	0.0924156	0.301082	0.0796496
138255	C9orf135	-0.426197	0.21645	-1.96904	0.048949	0.673274	0	1.62792	0.653077	-0.128463	-0.50279	0.0199803	-2.28808	-0.0739335	-0.297117	0.0114227	-0.649715	0.331225	0.349205	0.326839	0.0806311
3954	LETM1	-0.32268	0.163763	-1.9704	0.0487924	0.673274	0	3.45276	0.326941	-0.446863	-0.208535	-2.54221	-1.09784	-0.132692	-0.0752712	-0.864643	-0.275873	0.0881735	0.130287	0.115678	0.0631451
2706	GJB2	-0.389462	0.197755	-1.96942	0.0489051	0.673274	25.8682	5.39579	0.145006	0.254857	-3.0296	-1.3401	-1.31237	0.0671522	-0.742464	-0.654339	-0.34816	0.069427	0.0600592	0.238413	0.0703799
27329	ANGPTL3	-0.320455	0.162686	-1.96978	0.0488639	0.673274	33.002	5.97033	0.113063	-0.569392	-2.21799	0.337852	-3.10576	-0.122863	-0.507275	0.0961829	-0.634223	0.0465605	0.0523079	0.0810481	0.0417013
10585	POMT1	0.319181	0.162148	1.96845	0.0490158	0.673274	4.72466	4.19836	0.240826	2.49778	1.21789	1.27051	-0.160507	0.637296	0.315299	0.517749	-0.0367485	0.0650988	0.0670242	0.166066	0.0524194
4995	OR3A2	-0.419366	0.213096	-1.96797	0.0490719	0.673466	42.2031	6.92079	0.0744659	-0.826569	-1.18846	0.0737412	-4.19039	-0.225523	-0.29343	0.032513	-0.931857	0.0744427	0.0609593	0.194399	0.0494527
10084	PQBP1	0.268079	0.136256	1.96747	0.0491293	0.673678	0	1.01282	0.798151	1.48411	0.364526	1.36594	0.826126	0.361215	0.110785	0.536399	0.18627	0.0592377	0.0923643	0.15421	0.0508383
1466	CSRP2	0.295396	0.150196	1.96674	0.0492127	0.674243	0	1.55084	0.670587	1.98022	0.340017	0.919082	0.733029	0.574934	0.107884	0.384695	0.178708	0.0842964	0.100674	0.175197	0.0594357
6286	S100P	0.366237	0.186317	1.96566	0.0493377	0.674802	0	3.08201	0.379152	-0.0707535	0.538148	2.47559	0.812814	-0.0262075	0.242349	0.808237	0.286605	0.1372	0.202805	0.106591	0.124333
7644	ZNF91	-0.316775	0.161136	-1.96588	0.0493122	0.674802	0	2.41728	0.490426	-1.75551	-0.336488	-0.210611	-1.74429	-0.62749	-0.116118	-0.0606831	-0.544997	0.127763	0.119086	0.0830179	0.0976222
321	APBA2	-0.327597	0.166708	-1.9651	0.0494027	0.675114	0	3.45522	0.326616	-0.691193	0.455635	-0.709209	-2.7366	-0.23996	0.168816	-0.26254	-0.606322	0.120526	0.137275	0.137038	0.049089
158399	ZNF483	0.310791	0.158191	1.96466	0.0494533	0.67523	8.92615	4.39204	0.222125	-0.573837	1.94319	1.93331	1.54048	-0.161403	0.516021	0.635675	0.305758	0.079113	0.0705185	0.108111	0.0393953
1978	EIF4EBP1	-0.404008	0.205676	-1.96429	0.0494968	0.675247	23.4759	5.22711	0.155903	-1.01957	-0.162207	-3.18804	-0.835844	-0.372753	-0.05415	-0.98695	-0.21159	0.133662	0.111444	0.095839	0.0640828
6171	RPL41	-0.206664	0.105274	-1.96312	0.0496326	0.675949	0	0.813293	0.846285	-1.30017	-0.408536	-1.02609	-1.32548	-0.371659	-0.124037	-0.145274	-0.319071	0.0817124	0.0921804	0.0200448	0.0579463
375056	MIA3	0.310399	0.158116	1.96312	0.0496324	0.675949	0	1.00193	0.800784	0.694468	0.301161	1.65644	1.24055	0.221246	0.104154	0.564054	0.341948	0.101495	0.119607	0.115955	0.0759781
79574	EPS8L3	0.474822	0.241999	1.96208	0.0497533	0.677017	51.2569	8.20629	0.0419354	-0.329869	3.47809	0.478186	3.12207	-0.0905432	0.945966	0.237364	0.668832	0.0753407	0.0739722	0.246399	0.0458934
79927	FAM110D	-0.413975	0.21103	-1.96169	0.0497982	0.677053	50.7299	8.11851	0.0436249	-0.916197	-1.11012	-0.0181933	-4.76819	-0.229546	-0.233109	-0.0092612	-0.894629	0.0627714	0.0440936	0.259126	0.0352029
7165	TPD52L2	0.286558	0.146179	1.96032	0.0499584	0.67808	0	3.56125	0.312904	-0.216898	1.07944	1.74751	1.91333	-0.051355	0.272237	0.585464	0.517351	0.0560601	0.0636064	0.112243	0.0731124
91461	PKDCC	0.475981	0.242789	1.96047	0.049941	0.67808	40.8128	6.75822	0.0800168	2.94815	1.04553	2.03093	-0.058578	0.855062	0.322744	1.04773	-0.0148838	0.0841194	0.0952886	0.266142	0.0645592
27245	AHDC1	0.323235	0.164929	1.95985	0.0500138	0.678103	0	2.1217	0.547535	1.7796	0.0750351	0.263223	1.64949	0.635633	0.0296413	0.0841884	0.46212	0.127576	0.156051	0.102296	0.0784893
6406	SEMG1	0.378554	0.193181	1.95958	0.0500448	0.678103	9.29956	4.41012	0.220449	0.870331	-0.405424	1.73697	2.751	0.257387	-0.142294	0.925824	0.595742	0.0874589	0.123184	0.284102	0.0468959
26123	TCTN3	-0.255733	0.130627	-1.95773	0.0502621	0.679897	0	3.2596	0.353305	-0.481869	-0.0263625	-0.22743	-2.74086	-0.129718	-0.00796826	-0.0651487	-0.518708	0.0724676	0.0913598	0.0820571	0.0358156
953	ENTPD1	0.317968	0.162414	1.95777	0.0502573	0.679897	3.69615	4.15352	0.245357	0.0605233	0.656623	2.61696	1.38625	0.015391	0.188757	0.806411	0.361002	0.0646679	0.0826369	0.0949551	0.0678166
6397	SEC14L1	0.336516	0.171926	1.95733	0.0503088	0.679954	15.3007	4.72259	0.193275	2.23602	1.71654	1.56231	-0.555354	0.562364	0.451466	0.521083	-0.144433	0.0632534	0.0691737	0.111245	0.0676381
4922	NTS	-0.529802	0.270752	-1.95678	0.0503732	0.680251	71.61	14.0895	0.00278588	0.847394	-2.06164	-3.4016	-3.71496	0.203968	-0.481528	-1.24261	-0.734823	0.0579364	0.0545532	0.133445	0.0391252
79939	SLC35E1	-0.276203	0.141179	-1.9564	0.0504185	0.680289	0	2.93235	0.402174	-1.34849	0.788238	-1.52167	-1.41583	-0.484098	0.287522	-0.369953	-0.333916	0.128875	0.133054	0.0591084	0.0556225
6899	TBX1	0.208001	0.106396	1.95497	0.0505867	0.680837	0	0.653291	0.884132	0.732679	1.27136	-0.0152191	1.52374	0.148753	0.253873	-0.00528291	0.275005	0.0412198	0.0398744	0.120494	0.0325732
23382	AHCYL2	0.284074	0.145291	1.95521	0.0505587	0.680837	0	2.92718	0.402989	0.854848	-0.408799	0.689127	2.31889	0.251446	-0.133503	0.233961	0.550219	0.0865189	0.106651	0.115262	0.0563004
92595	ZNF764	0.290316	0.148459	1.95553	0.0505204	0.680837	0	2.83005	0.418577	0.342716	0.736785	0.23559	2.43687	0.115423	0.233067	0.0653558	0.661565	0.113428	0.100064	0.0769581	0.0737021
653	BMP5	0.450432	0.230705	1.95242	0.0508887	0.681986	35.6001	6.21119	0.101775	3.40658	1.48557	0.627773	0.112563	0.992881	0.508247	0.254261	0.0300173	0.0849486	0.117047	0.164041	0.0711129
1201	CLN3	0.372564	0.190807	1.95257	0.0508706	0.681986	19.1939	4.95012	0.175486	0.271496	3.14494	0.0984967	1.42452	0.0748134	0.841502	0.0388129	0.394765	0.0759335	0.0715954	0.155277	0.0767964
55143	CDCA8	0.373059	0.191132	1.95184	0.0509569	0.681986	0	0.95239	0.81277	0.674045	0.468454	1.48963	1.36722	0.285344	0.188959	0.850451	0.385483	0.17921	0.162706	0.325943	0.0794933
339416	ANKRD45	0.316673	0.162086	1.95373	0.0507327	0.681986	0	1.45317	0.69312	2.05211	0.658615	0.212614	0.761662	0.623537	0.223045	0.11626	0.195564	0.0923262	0.11469	0.299006	0.0659254
9868	TOMM70	-0.245615	0.125845	-1.95173	0.0509701	0.681986	0	2.5102	0.473451	-0.539725	-0.61926	-2.36513	-0.225393	-0.142628	-0.154492	-0.552286	-0.0593607	0.0698332	0.0622394	0.0545275	0.0693612
23348	DOCK9	0.328947	0.168475	1.9525	0.0508791	0.681986	0	1.46754	0.689781	1.39057	-0.363383	0.802856	1.60296	0.541631	-0.170416	0.340726	0.37227	0.151713	0.219933	0.180109	0.053935
57572	DOCK6	-0.259324	0.132809	-1.95261	0.0508656	0.681986	0	0.519641	0.914556	-0.556379	-1.39775	-0.307939	-1.40508	-0.154618	-0.379063	-0.113784	-0.294095	0.0772292	0.0735469	0.136531	0.0438101
27296	TP53TG5	-0.264695	0.135679	-1.9509	0.0510695	0.682745	0	1.75426	0.624938	-1.62837	-0.153185	-1.38876	-0.97803	-0.392192	-0.0379316	-0.617955	-0.246648	0.0580083	0.0613154	0.197997	0.0635989
4583	MUC2	-0.313347	0.160656	-1.95042	0.0511265	0.682937	0	0.822158	0.84416	-1.72281	-0.422994	-0.387057	-1.15303	-0.509392	-0.1336	-0.192837	-0.316731	0.0874235	0.0997578	0.248217	0.0754578
4583		-0.313347	0.160656	-1.95042	0.0511265	0.682937	0	0.822158	0.84416	-1.72281	-0.422994	-0.387057	-1.15303	-0.509392	-0.1336	-0.192837	-0.316731	0.0874235	0.0997578	0.248217	0.0754578
79009	DDX50	-0.333476	0.17104	-1.94969	0.0512126	0.683518	6.5768	4.28159	0.232619	-2.61129	-1.51246	0.630443	-1.00011	-0.628074	-0.408494	0.20617	-0.324406	0.0578512	0.0729458	0.106945	0.105217
3693	ITGB5	-0.275466	0.141337	-1.949	0.0512948	0.683734	0	0.805603	0.848126	-0.904802	-1.30075	-1.18459	-0.830878	-0.285177	-0.443148	-0.480146	-0.165217	0.0993394	0.116068	0.164289	0.0395401
8722	CTSF	0.304035	0.156008	1.94884	0.0513142	0.683734	0	3.03095	0.386878	1.25773	2.28674	0.143424	0.194005	0.388136	0.700879	0.0504989	0.055292	0.0952344	0.0939404	0.123971	0.0812268
55693	KDM4D	-0.396874	0.203873	-1.94667	0.0515739	0.684916	36.7962	6.32873	0.0966673	-0.833117	-1.98464	-2.84182	-0.080683	-0.250998	-0.486644	-1.09686	-0.0181823	0.090767	0.0601256	0.148975	0.0507849
205717	USF3	-0.292086	0.150021	-1.94697	0.0515381	0.684916	0	3.52073	0.318083	-0.729207	-2.39405	0.395432	-1.31122	-0.214841	-0.641635	0.124988	-0.31732	0.0868022	0.0718305	0.0999067	0.0585659
29095	ORMDL2	0.381277	0.195843	1.94685	0.0515522	0.684916	19.2568	4.95397	0.175199	1.03369	-0.791611	2.51262	2.12515	0.338344	-0.294518	0.66513	0.581255	0.107137	0.138421	0.0700742	0.0748091
5670	PSG2	-0.442138	0.227104	-1.94685	0.0515529	0.684916	49.096	7.85793	0.049041	-0.649624	-1.06946	-3.52045	-1.02671	-0.186232	-0.296562	-1.40378	-0.206171	0.0821834	0.0768951	0.159001	0.0403234
79871	RPAP2	-0.42493	0.218351	-1.94609	0.0516439	0.685277	41.3303	6.81783	0.0779364	0.0360588	-3.42779	-0.428915	-2.16215	0.0112181	-1.05849	-0.149375	-0.457532	0.0967861	0.0953555	0.121286	0.0447787
1063	CENPF	0.365459	0.187881	1.94516	0.0517552	0.685367	0	1.17457	0.75911	0.79927	0.746856	0.109966	1.93637	0.384723	0.349555	0.0412648	0.551083	0.231691	0.219058	0.140812	0.0809951
646	BNC1	0.216076	0.111078	1.94526	0.0517435	0.685367	0	2.60415	0.456762	-0.175843	1.36509	-0.176151	2.11253	-0.0412188	0.32822	-0.0651037	0.341665	0.0549464	0.0578106	0.136597	0.0261576
9076	CLDN1	-0.31499	0.161951	-1.94497	0.0517791	0.685367	0	2.8467	0.415869	-2.03465	-1.48874	0.267659	-0.449247	-0.662237	-0.474399	0.121087	-0.120268	0.105937	0.101543	0.204659	0.0716684
8233	ZRSR2	0.274408	0.141222	1.9431	0.0520041	0.686815	0	1.36898	0.712821	1.7151	0.444222	0.336895	1.37557	0.458912	0.116025	0.103698	0.415504	0.0715941	0.0682185	0.0947434	0.0912391
582	BBS1	-0.293626	0.151081	-1.9435	0.0519563	0.686815	0	2.42159	0.489628	-1.07132	-0.359752	0.177042	-2.21139	-0.30974	-0.11337	0.0666826	-0.576215	0.0835895	0.0993088	0.141864	0.0678947
200403	VWA3B	-0.304328	0.156629	-1.94299	0.0520171	0.686815	0	3.22789	0.357805	0.686111	-1.01129	-1.2507	-2.10586	0.234679	-0.35531	-0.419958	-0.482829	0.116993	0.123442	0.112747	0.0525688
126014	OSCAR	0.475435	0.244918	1.94121	0.0522334	0.689102	59.5893	9.89837	0.0194501	-0.51976	1.63192	3.50354	2.28417	-0.124594	0.484411	1.03008	0.579562	0.0574634	0.088111	0.0864431	0.0643785
57821	CCDC181	-0.26113	0.134615	-1.93982	0.0524011	0.690746	0	3.4108	0.332516	-2.28101	-0.329839	-1.49981	-0.177456	-0.563485	-0.0952097	-0.443497	-0.036359	0.0610252	0.0833219	0.0874397	0.0419803
59067	IL21	0.296448	0.152907	1.93875	0.052532	0.691333	0	0.23566	0.971637	1.31509	0.93471	0.304161	1.13963	0.413432	0.280366	0.151774	0.272255	0.0988322	0.0899699	0.248993	0.0570725
51593	SRRT	0.251894	0.129911	1.93898	0.0525039	0.691333	0	1.69831	0.63731	1.61652	1.53299	-0.333728	0.619176	0.355141	0.369697	-0.112863	0.174456	0.0482659	0.0581584	0.114371	0.0793862
363	AQP6	-0.478727	0.246996	-1.9382	0.0525992	0.69165	45.2703	7.30864	0.0626845	-2.23459	0.418582	-3.30469	-0.956813	-0.730746	0.150611	-1.01918	-0.265671	0.10694	0.129466	0.0951124	0.0770962
11326	VSIG4	-0.330532	0.170611	-1.93734	0.0527034	0.691884	0	0.767822	0.857147	-0.516217	-1.49895	-0.311601	-1.38228	-0.187174	-0.558727	-0.132669	-0.368976	0.13147	0.13894	0.181275	0.071253
1767	DNAH5	-0.333307	0.172015	-1.93766	0.0526649	0.691884	0	2.89765	0.407676	-1.27643	0.405125	0.093142	-2.20229	-0.497032	0.184024	0.0404311	-0.533395	0.151626	0.206335	0.188425	0.0586607
137209	ZNF572	-0.55069	0.284476	-1.9358	0.052892	0.69359	58.7938	9.70728	0.0212255	-0.846644	-4.87914	-0.456057	-1.08709	-0.244168	-1.23845	-0.277455	-0.278373	0.0831715	0.0644272	0.370123	0.0655722
6498	SKIL	0.739196	0.3819	1.93557	0.05292	0.69359	88.5651	34.9806	1.22983e-07	2.79013	0.324747	7.13295	1.44454	0.584005	0.0715494	2.13475	0.271206	0.0438112	0.0485423	0.0895684	0.0352482
4286	MITF	-0.268598	0.138814	-1.93495	0.0529967	0.694027	0	3.79341	0.284653	-0.633426	-0.288342	-2.6013	-1.06038	-0.154373	-0.0784733	-0.799222	-0.205127	0.0593951	0.0740674	0.0943961	0.0374213
23646	PLD3	-0.52386	0.270979	-1.93321	0.0532098	0.695113	71.0905	13.8363	0.00313668	-1.34582	-0.619826	-0.936743	-6.2734	-0.344444	-0.158415	-0.317921	-1.16882	0.0655037	0.0653214	0.115185	0.0347128
8995	TNFSF18	0.42104	0.217739	1.93369	0.0531507	0.695113	30.7297	5.77448	0.123113	3.62992	0.928026	0.0133568	0.754762	0.966453	0.272292	0.00695078	0.19815	0.070887	0.0860892	0.27081	0.0689239
1490	CTGF	0.268142	0.138696	1.93331	0.0531986	0.695113	0	0.658363	0.882951	0.650563	0.320974	1.21042	1.5507	0.190493	0.116286	0.557675	0.2931	0.0857394	0.131255	0.212272	0.0357253
84059	ADGRV1	-0.390591	0.202343	-1.93034	0.0535645	0.698999	61.5215	10.3954	0.0154875	-3.51605	0.0925851	-3.00859	-0.669808	-0.661395	0.0190628	-0.88384	-0.134565	0.0353843	0.0423927	0.0863023	0.0403611
85019	TMEM241	-0.324656	0.168207	-1.9301	0.0535946	0.698999	0	1.60498	0.658262	-0.3139	-1.2355	-1.85217	-0.524138	-0.123732	-0.484495	-0.609928	-0.144356	0.155375	0.153778	0.108441	0.0758543
57827	C6orf47	-0.255569	0.132439	-1.92971	0.0536426	0.699057	0	1.55465	0.669717	-1.16087	-0.84219	-0.12011	-1.79084	-0.300067	-0.198248	-0.0339969	-0.527711	0.0668147	0.0554113	0.0801161	0.0868316
23423	TMED3	-0.29329	0.152037	-1.92908	0.0537212	0.699511	0	1.68928	0.639321	-0.166773	-1.96155	-0.679918	-1.03577	-0.0464259	-0.557474	-0.23792	-0.330698	0.0774939	0.0807698	0.122447	0.101938
7067	THRA	-0.349948	0.181685	-1.92613	0.0540882	0.699738	40.5207	6.72503	0.0811982	-1.51654	-1.1252	-3.04188	-0.0571907	-0.393059	-0.26523	-0.9273	-0.0108008	0.0671748	0.0555632	0.0929304	0.0356667
79786	KLHL36	-0.234674	0.12183	-1.92625	0.0540733	0.699738	0	1.48929	0.684744	-0.0562917	-1.74146	-1.15403	-0.912178	-0.0141725	-0.450313	-0.267299	-0.214985	0.0633877	0.0668651	0.0536488	0.0555464
253738	EBF3	0.322332	0.167324	1.92639	0.0540551	0.699738	2.20585	4.09022	0.251885	0.388052	0.611371	0.0940121	3.13015	0.115015	0.169377	0.0374495	0.695939	0.0878467	0.0767533	0.158681	0.0494323
92421	CHMP4C	-0.367834	0.190853	-1.92732	0.0539401	0.699738	15.7544	4.74802	0.191206	-2.47622	0.326662	-0.82516	-1.93403	-0.64395	0.0830249	-0.393869	-0.571597	0.067628	0.064598	0.227839	0.0873485
2172	FABP6	0.226663	0.117667	1.92631	0.0540658	0.699738	0	2.84294	0.41648	1.52704	1.69834	1.096	-0.369014	0.328408	0.369697	0.379438	-0.080225	0.0462514	0.0473851	0.119856	0.0472643
3956	LGALS1	0.29852	0.154886	1.92735	0.053936	0.699738	0	1.4733	0.688445	0.000983934	1.31109	1.07373	1.52189	0.000287052	0.441278	0.377402	0.421876	0.0851118	0.113282	0.123543	0.0768431
151056	PLB1	0.295348	0.153288	1.92676	0.0540095	0.699738	0	1.92544	0.588025	1.14711	1.96579	0.10973	0.667554	0.378109	0.628512	0.0386657	0.169459	0.108649	0.102224	0.124165	0.0644399
9033	PKD2L1	-0.315813	0.163932	-1.92649	0.054043	0.699738	0	1.61367	0.656293	-1.42905	-1.60614	0.33219	-0.769949	-0.448886	-0.52937	0.181956	-0.201936	0.0986683	0.108631	0.300027	0.0687862
284323	ZNF780A	0.405885	0.210816	1.92531	0.0541908	0.700398	39.1144	6.56969	0.0869541	-0.48931	2.96463	0.78854	2.59463	-0.124955	0.718965	0.445455	0.576053	0.0652135	0.058813	0.319124	0.0492918
3557	IL1RN	0.266009	0.138185	1.92502	0.0542266	0.700398	0	1.41822	0.701271	2.00353	0.548207	0.658951	0.612393	0.529026	0.163254	0.237262	0.140357	0.0697204	0.0886823	0.129643	0.0525299
10451	VAV3	0.623309	0.324964	1.91808	0.0551003	0.700436	58.8499	9.72051	0.0210976	1.0949	2.75852	3.03417	-0.259317	0.47938	1.17141	1.06005	-0.0683572	0.191693	0.18033	0.12206	0.0694873
5777	PTPN6	0.25786	0.134342	1.91942	0.0549308	0.700436	0	2.90978	0.405746	0.190617	1.09168	0.0539362	2.3158	0.0513245	0.295143	0.0158331	0.573093	0.0724982	0.073092	0.0861732	0.0612415
7429	VIL1	0.276511	0.144351	1.91555	0.0554224	0.700436	0	3.39369	0.334815	0.476823	2.37032	-0.45607	1.31353	0.138702	0.600842	-0.161766	0.295437	0.084616	0.0642549	0.125808	0.0505878
131669	UROC1	-0.289672	0.151006	-1.91828	0.0550755	0.700436	0	0.514441	0.915708	-1.38342	-0.785648	-1.05038	-0.748231	-0.371666	-0.219944	-0.557452	-0.202229	0.0721766	0.0783733	0.28166	0.073049
145264	SERPINA12	0.468053	0.244376	1.9153	0.0554541	0.700436	56.0023	9.09138	0.0281002	0.267068	0.817204	3.34	2.18059	0.064971	0.201364	1.65256	0.502901	0.0591825	0.0607159	0.244804	0.0531885
57610	RANBP10	0.30951	0.161512	1.91633	0.0553237	0.700436	0	2.18596	0.534718	1.99212	0.855596	1.06379	-0.161375	0.614726	0.289877	0.335788	-0.0535419	0.0952212	0.114786	0.0996365	0.110081
23129	PLXND1	0.386497	0.201501	1.9181	0.0550989	0.700436	24.8396	5.32195	0.149684	1.54089	1.22072	-0.825542	3.0912	0.458907	0.374124	-0.328381	0.735212	0.0886962	0.093929	0.158226	0.0565679
5202	PFDN2	0.309403	0.161073	1.92089	0.0547458	0.700436	0	0.671098	0.87998	1.01097	1.39171	0.139305	1.17583	0.35189	0.413749	0.0503098	0.349656	0.121153	0.0883845	0.130428	0.0884285
57471	ERMN	0.235174	0.122623	1.91786	0.0551291	0.700436	0	2.78493	0.425987	1.81807	1.06415	1.42235	-0.0471322	0.402153	0.273582	0.575289	-0.0094597	0.0489285	0.0660946	0.163591	0.0402828
27040	LAT	-0.221152	0.115406	-1.9163	0.0553272	0.700436	0	3.18061	0.364609	0.328767	-1.55851	-1.71309	-1.27003	0.0742493	-0.340134	-0.600976	-0.224664	0.0510043	0.0476298	0.12307	0.0312923
155	ADRB3	0.268969	0.139996	1.92126	0.0546992	0.700436	0	0.982188	0.805562	0.549616	1.71247	0.948019	0.734876	0.151252	0.469782	0.387489	0.170646	0.0757327	0.0752569	0.167065	0.0539217
2739	GLO1	0.260854	0.13569	1.92243	0.0545518	0.700436	0	1.88911	0.595738	1.05053	-0.429069	1.61673	1.29742	0.281229	-0.142008	0.400636	0.335601	0.0716642	0.10954	0.0614079	0.066909
7879	RAB7A	0.328387	0.170857	1.92201	0.0546051	0.700436	43.2689	7.05081	0.0702958	1.79917	0.598032	3.44642	0.0693148	0.33614	0.129859	0.866417	0.0168641	0.0349056	0.0471514	0.0632002	0.0591934
9706	ULK2	0.32333	0.168051	1.924	0.0543544	0.700436	0	2.69014	0.441906	-0.159718	-0.0937835	1.16095	2.23826	-0.0626833	-0.0397203	0.419656	0.565083	0.154027	0.17938	0.130664	0.0637388
55839	CENPN	0.320453	0.166643	1.92299	0.0544815	0.700436	0	2.79944	0.423592	0.253571	-0.411003	1.64222	1.88871	0.103701	-0.155284	0.509863	0.530999	0.167249	0.142747	0.096393	0.079042
23411	SIRT1	-0.348359	0.18181	-1.91606	0.0553574	0.700436	0	3.89835	0.272651	-2.71484	-0.957065	-0.702869	0.0248153	-0.773398	-0.311495	-0.301305	0.00686792	0.0811554	0.10593	0.183766	0.0765971
84816	RTN4IP1	0.285196	0.148887	1.91552	0.0554267	0.700436	0	1.70636	0.63552	0.76722	0.245805	1.41592	1.64976	0.197791	0.0688782	0.587345	0.486106	0.066462	0.0785206	0.172072	0.0868205
2014	EMP3	0.288249	0.150224	1.9188	0.0550101	0.700436	0	0.832506	0.841677	0.914143	1.00212	0.253831	1.61554	0.247752	0.280632	0.0899699	0.511224	0.0734521	0.0784217	0.125633	0.100136
8682	PEA15	0.295872	0.154057	1.92054	0.0547896	0.700436	0	3.99562	0.261938	1.38053	0.744248	2.49792	-0.0897433	0.363112	0.203051	0.719306	-0.0221895	0.0691813	0.0744345	0.0829223	0.0611351
1013	CDH15	0.270286	0.140867	1.91873	0.0550185	0.700436	0	2.22452	0.527134	0.379525	0.94532	-0.241382	2.1932	0.101748	0.256451	-0.10737	0.519268	0.0718745	0.0735953	0.197858	0.0560568
951	CD37	0.302133	0.157441	1.91903	0.0549808	0.700436	0	2.9118	0.405425	1.03263	1.5504	-0.704543	1.62111	0.296303	0.426036	-0.277926	0.555134	0.082334	0.07551	0.155613	0.117266
53834	FGFRL1	-0.279981	0.146132	-1.91595	0.0553717	0.700436	0	2.35178	0.502674	-1.1492	0.576311	-1.01363	-1.82823	-0.345174	0.199964	-0.419148	-0.393468	0.0902171	0.12039	0.170993	0.0463189
125336	LOXHD1	0.316274	0.165054	1.91618	0.0553426	0.700436	0	1.94164	0.584608	1.47546	-0.207345	0.540117	1.76116	0.441785	-0.0675788	0.310999	0.486169	0.089654	0.106226	0.331545	0.076204
130951	M1AP	0.404073	0.210909	1.91586	0.055383	0.700436	21.3779	5.08763	0.165492	-0.383851	0.503905	1.77151	3.10911	-0.138503	0.178179	0.643822	0.750903	0.130195	0.12503	0.132083	0.0583302
27300	ZNF544	-0.285314	0.148589	-1.92016	0.0548374	0.700436	0	3.53144	0.316707	-0.94691	-2.6315	-0.256284	-0.24647	-0.25889	-0.679569	-0.0872223	-0.0601109	0.0747505	0.0666902	0.115828	0.059481
2255	FGF10	-0.42613	0.222114	-1.91852	0.055045	0.700436	41.8926	6.88381	0.0756948	-1.46321	0.3467	-1.48063	-3.37921	-0.366315	0.09244	-0.739264	-0.822582	0.0626752	0.0710905	0.249292	0.0592554
7586	ZKSCAN1	-0.326803	0.170368	-1.91822	0.0550829	0.700436	0	1.44291	0.695508	-0.581633	-1.75038	-1.2402	-0.426932	-0.255801	-0.755221	-0.344201	-0.129144	0.193422	0.186159	0.0770274	0.0915025
4436	MSH2	0.280446	0.146111	1.91941	0.0549329	0.700436	0	3.474	0.32415	-0.0747607	1.27087	2.16911	1.16348	-0.0206825	0.378938	0.850946	0.228808	0.076535	0.088907	0.153901	0.0386747
26239	LCE2B	-0.380696	0.198994	-1.9131	0.0557349	0.703428	44.571	7.21644	0.0653099	-0.787227	0.0423014	-1.88571	-3.358	-0.181567	0.00970258	-0.707172	-0.765359	0.0531955	0.0526096	0.140637	0.051948
54870	QRICH1	0.445278	0.232834	1.91243	0.0558214	0.703439	60.8062	10.2057	0.0168963	2.51325	-0.90542	2.89332	2.52308	0.588714	-0.225292	0.959648	0.540095	0.0548705	0.0619144	0.11001	0.0458224
23303	KIF13B	0.275572	0.144105	1.9123	0.0558372	0.703439	0	2.50435	0.474506	-0.281303	1.42346	1.00639	1.74444	-0.0754456	0.37965	0.371867	0.486239	0.0719314	0.071134	0.136534	0.0776942
9108	MTMR7	0.263097	0.137598	1.91207	0.0558675	0.703439	0	1.98208	0.576134	-0.0338198	1.32763	1.52114	1.24919	-0.00899165	0.367074	0.631282	0.280856	0.0706865	0.0764459	0.17223	0.0505484
55003	PAK1IP1	-0.291755	0.152663	-1.91111	0.0559907	0.704437	0	1.34101	0.719418	-0.11001	-0.53581	-0.656379	-2.06478	-0.039839	-0.190588	-0.209415	-0.49281	0.131144	0.126523	0.10179	0.0569653
2597	GAPDH	0.337579	0.176712	1.91034	0.0560898	0.705129	17.6804	4.85911	0.182409	-0.148848	2.38673	2.09656	0.603323	-0.0399488	0.629668	0.69338	0.155173	0.0720316	0.069601	0.109377	0.0661501
3933	LCN1	0.306288	0.160379	1.90978	0.0561617	0.70548	0	0.501457	0.918571	0.417961	0.762276	0.790297	1.66385	0.133082	0.268861	0.383585	0.406769	0.101384	0.124404	0.235582	0.059768
3930	LBR	0.340434	0.178305	1.90928	0.0562262	0.705736	0	3.64673	0.302224	1.16497	-0.905508	1.25024	2.24591	0.43197	-0.392245	0.389478	0.545778	0.137493	0.187643	0.0970461	0.0590539
29995	LMCD1	0.338346	0.177277	1.90858	0.0563166	0.706317	4.00433	4.16685	0.244001	2.59686	-0.219031	1.04553	1.15109	0.684253	-0.0559308	0.439202	0.357273	0.0694282	0.0652065	0.176465	0.096334
57217	TTC7A	0.291675	0.152933	1.90721	0.0564936	0.707429	0	2.58689	0.459793	0.387822	1.1683	0.0120642	2.16999	0.118828	0.443804	0.00359231	0.582123	0.0938799	0.144303	0.0886649	0.0719636
996	CDC27	-0.293105	0.153677	-1.90727	0.0564851	0.707429	0	1.50603	0.68088	-0.604011	-0.529023	-0.2562	-2.10556	-0.186467	-0.172415	-0.0933362	-0.545451	0.0953052	0.106219	0.132722	0.0671083
9369	NRXN3	-0.338913	0.177838	-1.90575	0.0566831	0.708141	45.186	7.29741	0.0629989	-0.803797	0.111763	-2.04332	-3.42383	-0.167059	0.0233811	-0.774152	-0.60846	0.0431963	0.0437658	0.143542	0.031582
3274	HRH2	-0.305528	0.160286	-1.90614	0.0566327	0.708141	0	1.70825	0.635102	-0.991443	0.333021	-1.11333	-1.73443	-0.397107	0.124375	-0.337461	-0.453361	0.160428	0.139483	0.0918751	0.0683246
9275	BCL7B	0.29414	0.154336	1.90584	0.0566711	0.708141	0	0.553265	0.907043	1.47074	1.05028	0.261125	0.922571	0.379835	0.417033	0.0915967	0.260738	0.0666985	0.157664	0.123045	0.0798744
10229	COQ7	-0.315846	0.165792	-1.90507	0.0567713	0.70869	0	1.65848	0.646203	-0.153163	-0.638623	-0.382459	-2.1703	-0.0495302	-0.239555	-0.184608	-0.552695	0.104577	0.140709	0.232986	0.0648534
28227	PPP2R3B	0.317979	0.166991	1.90417	0.0568887	0.708702	0	1.06447	0.785658	0.323354	1.35851	1.45651	0.786635	0.112444	0.524817	0.512237	0.219828	0.120925	0.149243	0.123685	0.0780943
145773	FAM81A	-0.277164	0.145553	-1.90422	0.0568819	0.708702	0	2.8912	0.408706	-0.629885	-0.55103	0.15224	-2.40701	-0.196025	-0.157583	0.051328	-0.604554	0.0968504	0.0817843	0.113671	0.0630835
11214	AKAP13	-0.329421	0.173011	-1.90404	0.056905	0.708702	28.5035	5.59468	0.133084	-0.764768	-2.09882	-2.54742	0.166404	-0.185771	-0.544058	-0.737731	0.0378627	0.0590064	0.0671953	0.0838678	0.0517722
9796	PHYHIP	-0.484554	0.254538	-1.90366	0.0569545	0.708767	61.4535	10.3771	0.0156183	0.736336	-2.03055	-4.26369	-1.78128	0.237396	-0.620585	-1.04319	-0.418631	0.103943	0.0934058	0.0598627	0.0552327
4782	NFIC	-0.224797	0.118146	-1.90271	0.0570781	0.709112	0	3.75828	0.288777	0.177742	-0.738215	-0.760639	-2.75618	0.0379696	-0.155716	-0.20276	-0.478824	0.0456344	0.0444937	0.0710574	0.0301813
84439	HHIPL1	-0.255897	0.134474	-1.90294	0.057048	0.709112	0	0.418771	0.936338	-0.847171	-0.572028	-1.16283	-1.28174	-0.24588	-0.147751	-0.437165	-0.277308	0.0842372	0.0667153	0.141337	0.0468082
10350	ABCA9	-0.267494	0.140807	-1.89972	0.0574693	0.709112	0	1.58756	0.662215	-0.751848	-0.374913	-0.0581291	-2.11832	-0.193396	-0.115347	-0.0240169	-0.487245	0.0661661	0.0946562	0.170706	0.0529066
6580	SLC22A1	0.267894	0.140852	1.90195	0.0571782	0.709112	0	0.429009	0.934187	0.415344	1.18118	0.591784	1.45894	0.1159	0.362927	0.334503	0.298802	0.0778671	0.0944078	0.319503	0.0419461
79674	VEPH1	-0.293288	0.154264	-1.90121	0.0572745	0.709112	0	2.24694	0.522763	-1.90563	-1.18903	0.468284	-0.77269	-0.569625	-0.355841	0.216267	-0.199668	0.0893517	0.0895628	0.213286	0.0667739
199675	MCEMP1	0.318168	0.167444	1.90015	0.0574139	0.709112	0	1.13939	0.767575	0.530137	0.497791	1.81781	0.957427	0.165142	0.190687	0.620729	0.303218	0.0970372	0.146739	0.116602	0.100299
80162	PGGHG	0.356767	0.187785	1.89987	0.0574505	0.709112	0	1.6047	0.658325	1.73558	1.46407	0.15396	0.186365	0.591878	0.509192	0.0763928	0.0683684	0.116298	0.120959	0.246201	0.13458
148213	ZNF681	-0.307536	0.161773	-1.90104	0.0572965	0.709112	0	1.58352	0.663132	-1.51975	-1.24289	-1.02243	-0.545624	-0.644392	-0.479997	-0.415601	-0.122336	0.179786	0.149146	0.165229	0.0502716
63908	NAPB	-0.270473	0.142293	-1.90081	0.0573268	0.709112	0	3.25804	0.353525	-2.00128	0.0113417	-0.142739	-1.78162	-0.550287	0.00296932	-0.0427356	-0.464258	0.0756073	0.0685427	0.0896384	0.0679029
81552	VOPP1	0.296766	0.156097	1.90117	0.0572803	0.709112	0	1.13439	0.768779	1.20241	-0.431793	1.07722	1.39864	0.347116	-0.224091	0.314229	0.379591	0.0833384	0.269338	0.0850912	0.0736582
116449	CLNK	-0.279142	0.147027	-1.89857	0.057621	0.709984	0	3.18375	0.364154	-0.269417	-1.61787	0.400623	-2.06532	-0.0715007	-0.500241	0.152747	-0.487104	0.0704323	0.095603	0.14537	0.0556249
79844	ZDHHC11	0.257523	0.135645	1.8985	0.0576296	0.709984	0	0.733308	0.865343	1.41343	0.956843	-0.188466	1.17846	0.430538	0.265676	-0.114043	0.223231	0.0927842	0.0770946	0.36616	0.0358819
1368	CPM	-0.255414	0.134592	-1.89769	0.0577369	0.709984	0	1.33326	0.72125	0.0372577	-1.48502	-0.949187	-1.35162	0.0107381	-0.441885	-0.366557	-0.269437	0.083066	0.0885433	0.149135	0.0397379
222235	FBXL13	0.335832	0.176941	1.89799	0.0576971	0.709984	0	1.29843	0.729507	0.501114	0.0275434	1.45364	1.59244	0.182612	0.0121658	0.638571	0.424045	0.132796	0.195094	0.192978	0.0709082
9355	LHX2	-0.323699	0.170592	-1.8975	0.0577615	0.709984	0	3.47145	0.324483	-2.35372	-1.45795	-0.24943	0.113342	-0.673635	-0.437342	-0.123784	0.0311132	0.0819108	0.0899821	0.246281	0.0753538
57864	SLC46A2	0.279986	0.147633	1.89649	0.0578948	0.711076	0	0.327778	0.954722	0.88385	0.934136	0.321192	1.47224	0.245871	0.283926	0.122654	0.376677	0.077385	0.0923829	0.145825	0.0654605
11234	HPS5	-0.365538	0.192961	-1.89436	0.0581776	0.713465	39.5053	6.61214	0.0853432	-2.28708	-2.74407	0.941198	-1.56906	-0.569988	-0.76212	0.345393	-0.290938	0.0621112	0.0771357	0.134668	0.0343812
167838	TXLNB	-0.292776	0.154552	-1.89435	0.0581784	0.713465	0	2.55599	0.465258	-1.40244	-1.70847	0.838158	-0.745877	-0.431882	-0.446878	0.45378	-0.204583	0.094834	0.0684165	0.293116	0.0752325
51256	TBC1D7	0.340205	0.179674	1.89346	0.0582971	0.714189	0	3.93366	0.268717	-0.534841	1.8384	1.43278	1.69932	-0.15828	0.558521	0.590569	0.466564	0.0875794	0.0922999	0.169895	0.0753831
257236	CCDC96	-0.331346	0.175016	-1.89324	0.0583266	0.714189	0	3.41937	0.331372	0.464535	-1.16349	-1.33625	-2.06638	0.149167	-0.354023	-0.674263	-0.560247	0.103112	0.0925845	0.254616	0.0735087
4521	NUDT1	0.261447	0.13825	1.89112	0.0586081	0.716303	0	0.488367	0.92144	0.544327	1.22833	1.11388	1.0094	0.145157	0.382274	0.383926	0.22849	0.0711138	0.0968544	0.1188	0.0512395
51208	CLDN18	-0.209828	0.110953	-1.89114	0.0586059	0.716303	0	1.61198	0.656675	-0.966685	-0.219803	-0.165067	-2.0441	-0.208586	-0.0436498	-0.0741072	-0.37677	0.0465588	0.0394366	0.201559	0.0339741
245934	DEFB121	-0.290406	0.153578	-1.89093	0.0586334	0.716303	0	3.06643	0.381495	0.33702	-1.51406	-0.237091	-2.07257	0.0966789	-0.389649	-0.136621	-0.567932	0.0822911	0.0662309	0.332053	0.0750888
140688	NOL4L	0.310939	0.164546	1.88968	0.0588004	0.716938	0	3.867	0.276188	2.57423	-0.188848	1.11662	0.770597	0.746137	-0.057595	0.332452	0.207581	0.084012	0.0930136	0.088643	0.0725641
4625	MYH7	0.280138	0.148505	1.88639	0.0592429	0.716938	0	1.29714	0.729813	1.14977	1.43167	-0.329048	1.17289	0.312708	0.417784	-0.13303	0.313877	0.0739694	0.0851566	0.163449	0.0716154
3071	NCKAP1L	-0.262806	0.139575	-1.88291	0.0597128	0.716938	0	3.34223	0.341808	-1.49127	-0.680729	-2.12084	0.50873	-0.42139	-0.203617	-0.464927	0.14018	0.0798463	0.0894705	0.0480566	0.0759267
57158	JPH2	0.293499	0.155826	1.8835	0.0596326	0.716938	13.9331	4.64755	0.199501	2.77232	-0.281616	0.763226	1.46518	0.636638	-0.0650013	0.310889	0.298366	0.0527351	0.0532757	0.165922	0.0414682
9112	MTA1	0.277733	0.147098	1.88808	0.0590153	0.716938	0	3.40862	0.332808	0.475575	0.354628	0.268278	2.68736	0.120199	0.0941155	0.107022	0.648238	0.0638793	0.070433	0.159137	0.058186
3899	AFF3	-0.268204	0.142029	-1.88837	0.0589759	0.716938	0	0.201404	0.977362	-1.203	-0.715023	-1.09353	-0.782999	-0.348942	-0.220562	-0.317567	-0.200043	0.084135	0.0951525	0.0843356	0.0652715
8120	AP3B2	-0.317426	0.168484	-1.88401	0.0595635	0.716938	0	3.15103	0.36892	0.0745896	-1.5585	-1.89863	-0.892836	0.0242496	-0.675073	-0.755067	-0.220424	0.105695	0.187625	0.158158	0.0609499
3560	IL2RB	-0.439554	0.233148	-1.8853	0.0593891	0.716938	23.0243	5.19644	0.157965	-0.412077	-0.785454	-3.34492	-0.399278	-0.149244	-0.317155	-1.04175	-0.139221	0.13117	0.163043	0.0969972	0.12158
146050	ZSCAN29	0.301478	0.159933	1.88503	0.0594258	0.716938	0	0.857535	0.835662	0.688212	-0.00952424	1.46107	1.34255	0.263349	-0.0038128	0.4558	0.338278	0.146427	0.160261	0.0973217	0.0634878
6873	TAF2	-0.306928	0.162962	-1.88344	0.0596413	0.716938	0	1.15346	0.764187	-0.447719	-0.988348	-1.77697	-0.60488	-0.147919	-0.390897	-0.564836	-0.173148	0.109154	0.156425	0.101038	0.0819401
2487	FRZB	-0.267348	0.141951	-1.88338	0.0596488	0.716938	0	1.22407	0.747237	-1.7862	-0.431723	-0.130475	-1.17357	-0.502229	-0.136508	-0.0480327	-0.2651	0.0790575	0.0999784	0.135525	0.0510266
84342		0.259996	0.137561	1.89005	0.0587514	0.716938	0	1.62908	0.652813	1.83421	0.0888162	0.363891	1.3026	0.51353	0.0333397	0.094471	0.305713	0.0783856	0.140909	0.0673991	0.0550818
28964	GIT1	0.313366	0.166434	1.88282	0.0597245	0.716938	0	2.60555	0.456518	-0.154417	1.81564	0.239458	1.66518	-0.0533883	0.632233	0.0914499	0.468527	0.119537	0.121253	0.145851	0.0791676
642938	FAM196A	-0.263503	0.139952	-1.88281	0.0597257	0.716938	0	3.37348	0.337546	-2.47093	-1.06315	0.0464249	-0.358961	-0.641661	-0.268434	0.0259302	-0.0699673	0.0674359	0.0637511	0.311968	0.0379924
25821	MTO1	0.373643	0.198308	1.88415	0.0595442	0.716938	50.7781	8.12646	0.0434691	0.965368	0.195618	3.60869	1.34347	0.221122	0.0452167	1.0919	0.286303	0.0524662	0.0534293	0.0915515	0.0454149
57642	COL20A1	0.311032	0.164826	1.88703	0.0591557	0.716938	0	0.903723	0.824529	0.589831	1.13289	0.107799	1.67978	0.198351	0.367219	0.0441619	0.475303	0.113087	0.10507	0.16783	0.0800636
10455	ECI2	0.234599	0.124246	1.88818	0.0590018	0.716938	0	0.760757	0.858828	0.849178	0.545056	1.62105	0.82461	0.207492	0.165703	0.446336	0.168256	0.0597041	0.0924229	0.0758104	0.0416336
970	CD70	-0.265445	0.141027	-1.88223	0.0598045	0.716938	0	1.71219	0.634227	-0.191703	-1.34448	0.295188	-1.82304	-0.0546181	-0.358426	0.153962	-0.405474	0.0811742	0.0710704	0.272038	0.0494692
7157	TP53	0.32123	0.170209	1.88727	0.0591247	0.716938	0	1.30126	0.728833	-0.0302058	0.446285	1.55274	1.50065	-0.0114982	0.202681	0.537482	0.395159	0.144904	0.206253	0.119821	0.0693398
6035	RNASE1	0.235305	0.124935	1.88342	0.0596436	0.716938	0	0.860745	0.834889	1.09524	1.07306	1.30309	0.599131	0.304258	0.24885	0.48664	0.119008	0.0771727	0.0537812	0.139466	0.0394559
9168	TMSB10	0.233902	0.123985	1.88653	0.0592236	0.716938	0	2.98452	0.394018	-0.260923	0.888685	2.37957	0.152776	-0.0643921	0.236049	0.451864	0.0589072	0.0609031	0.0705519	0.0360596	0.14867
285203	EOGT	-0.499614	0.26466	-1.88776	0.0590586	0.716938	43.1216	7.03254	0.0708677	-2.50276	-2.65775	1.25693	-1.92774	-0.813862	-0.937703	0.704467	-0.456246	0.105746	0.124481	0.314123	0.0560146
80119	PIF1	0.303442	0.161203	1.88236	0.0597868	0.716938	0	1.86826	0.600195	0.197701	1.96311	0.235244	1.20967	0.0703083	0.67806	0.0955346	0.301201	0.126473	0.119301	0.164925	0.0619982
388341	LRRC75A	0.289917	0.153537	1.88825	0.058992	0.716938	0	1.3114	0.726429	0.414589	1.77721	0.958602	0.792233	0.135011	0.62282	0.341579	0.1923	0.106048	0.122814	0.126971	0.0589188
92092	ZC3HAV1L	0.307027	0.163026	1.8833	0.0596592	0.716938	0	3.27557	0.351058	1.0203	-0.301763	-0.116434	2.55882	0.340597	-0.102892	-0.0586921	0.554182	0.111436	0.11626	0.254095	0.0469058
4311	MME	0.241064	0.128104	1.88179	0.0598646	0.717122	0	1.3775	0.710817	1.17069	0.113426	1.53102	1.09144	0.321691	0.0338903	0.563239	0.202318	0.0755086	0.0892736	0.135339	0.0343614
1285	COL4A3	0.468682	0.249238	1.88046	0.0600455	0.718567	68.3074	12.6213	0.00553153	2.54947	0.937582	4.18225	-0.193623	0.578353	0.212118	1.20659	-0.0459387	0.0514618	0.0511845	0.0832335	0.0562917
1209	CLPTM1	0.315952	0.168456	1.87558	0.0607134	0.720431	0	0.687634	0.876109	0.235477	1.29953	1.0778	1.13998	0.0785576	0.417637	0.375463	0.394933	0.111296	0.103283	0.121356	0.12002
124989	EFCAB13	0.260201	0.138786	1.87483	0.0608156	0.720431	0	1.57158	0.665852	0.508501	2.01846	0.186913	0.847873	0.130284	0.507795	0.0629724	0.244019	0.0656449	0.0632902	0.113507	0.0828295
168850	ZNF800	-0.287617	0.153232	-1.877	0.0605178	0.720431	0	2.64696	0.449316	-2.00287	-1.39813	-0.417738	0.17134	-0.58215	-0.410225	-0.149216	0.0509723	0.0844822	0.0860899	0.127592	0.0885013
1936	EEF1D	0.297435	0.158471	1.87691	0.0605307	0.720431	2.1404	4.08749	0.252171	-0.314093	1.10623	1.208	2.48399	-0.0769836	0.277804	0.493266	0.590218	0.0600732	0.0630653	0.166735	0.0564579
3172	HNF4A	-0.487384	0.259749	-1.87636	0.0606053	0.720431	70.7325	13.667	0.00339527	-1.64341	-3.65374	-2.47199	0.447112	-0.42211	-0.856628	-0.908917	0.073569	0.0659725	0.0549679	0.135193	0.0270743
6094	ROM1	0.347266	0.185148	1.87561	0.0607082	0.720431	0	3.81019	0.282703	1.17311	-0.444825	1.70605	1.99162	0.329125	-0.149235	0.908766	0.539829	0.0787126	0.112554	0.28374	0.0734682
6302	TSPAN31	0.249367	0.132987	1.87513	0.0607751	0.720431	0	1.19132	0.755086	1.27834	1.61074	0.69022	-0.0489235	0.32112	0.353091	0.259155	-0.0136784	0.0631023	0.0480531	0.140976	0.0781696
84418	CYSTM1	0.29867	0.159239	1.87561	0.0607085	0.720431	0	0.342254	0.951895	1.35113	0.549226	1.16196	0.618724	0.392519	0.197667	0.370963	0.195107	0.084397	0.129529	0.101924	0.0994379
7789	ZXDA	-0.404525	0.215566	-1.87658	0.0605761	0.720431	48.7887	7.81077	0.0500888	-0.171573	-3.72075	0.0806522	-2.51119	-0.0475032	-1.00795	0.032092	-0.440113	0.076656	0.0733863	0.158329	0.0307163
283297	OR10A4	-0.367805	0.196014	-1.87642	0.0605977	0.720431	30.3057	5.73935	0.125003	-0.650364	-0.396492	-0.523919	-3.67497	-0.165745	-0.109749	-0.225982	-0.830923	0.0649485	0.0766188	0.186046	0.0511228
57697	FANCM	0.430795	0.229756	1.87501	0.0607908	0.720431	36.563	6.30547	0.0976582	-0.125692	1.35252	3.06785	1.16878	-0.0372943	0.400752	1.17926	0.352634	0.0880378	0.0877934	0.147759	0.0910293
5272	SERPINB9	-0.447865	0.238388	-1.87873	0.0602819	0.720431	52.0264	8.33791	0.0395207	-0.568184	-2.29773	0.435883	-4.25239	-0.162597	-0.686491	0.16396	-0.896142	0.0818934	0.089263	0.141493	0.0444107
2813	GP2	-0.28546	0.152116	-1.8766	0.0605733	0.720431	0	2.56326	0.463968	-1.10206	0.530059	-1.62577	-1.39508	-0.319597	0.180617	-0.52362	-0.385839	0.0841004	0.11611	0.103732	0.0764918
5865	RAB3B	-0.253102	0.135057	-1.87404	0.0609246	0.721189	0	1.03606	0.792527	-0.159644	-0.9991	-1.33638	-1.31853	-0.0419104	-0.28959	-0.444562	-0.299553	0.0689188	0.0840138	0.110665	0.0516143
2560	GABRB1	-0.325576	0.173778	-1.87351	0.0609976	0.72152	25.2458	5.35087	0.147835	-2.70933	-0.976833	-1.58145	0.169934	-0.636902	-0.283522	-0.551459	0.0340764	0.0552612	0.0842425	0.121595	0.0402112
353274	ZNF445	-0.49801	0.266647	-1.86767	0.0618077	0.722481	65.7183	11.668	0.00861132	-0.233172	-0.231815	-2.43248	-4.80449	-0.0637815	-0.0679212	-0.732218	-1.06868	0.0748231	0.0858475	0.0906114	0.0494766
51029	DESI2	-0.349241	0.187821	-1.85944	0.062965	0.722481	24.8129	5.32006	0.149806	-2.99526	-1.31438	-1.14675	0.504624	-0.72755	-0.359193	-0.379739	0.146961	0.0590007	0.0746821	0.109656	0.0848135
51066	SSUH2	-0.364118	0.195596	-1.86158	0.062662	0.722481	16.5589	4.7938	0.187534	-1.94471	-0.202778	0.478105	-2.78699	-0.555087	-0.0572608	0.242372	-0.698812	0.0814727	0.0797394	0.256991	0.0628708
79758	DHRS12	0.212639	0.11434	1.85971	0.0629262	0.722481	0	2.62417	0.453267	1.07045	0.765816	-0.634105	1.98703	0.289069	0.225437	-0.16818	0.32657	0.0729237	0.0866565	0.070344	0.0270112
5498	PPOX	0.418405	0.22378	1.86972	0.0615227	0.722481	17.966	4.87603	0.181104	2.29943	1.49597	1.50313	-0.463239	0.812459	0.544901	0.583738	-0.141823	0.124843	0.132674	0.150814	0.0937309
8987	STBD1	0.335642	0.180422	1.86031	0.062841	0.722481	0	1.96273	0.580178	0.523177	0.806133	-0.258824	2.10546	0.198861	0.304781	-0.120771	0.60255	0.144477	0.142943	0.217729	0.0819018
9092	SART1	-0.322642	0.173189	-1.86295	0.0624693	0.722481	0	3.30904	0.346386	-0.405002	-2.36739	-1.0468	-0.397527	-0.129181	-0.877812	-0.418087	-0.106881	0.101738	0.137488	0.159518	0.0722884
2937	GSS	0.280928	0.15019	1.87048	0.0614172	0.722481	0	3.49331	0.32163	1.72887	1.86627	-0.625237	0.911746	0.441902	0.566492	-0.208815	0.220769	0.0653321	0.092138	0.111541	0.0586313
56270	WDR45B	0.354657	0.190772	1.85906	0.0630186	0.722481	28.101	5.56336	0.134898	1.08478	-0.148198	3.30317	0.768959	0.272243	-0.0588367	0.881133	0.186354	0.0629835	0.15762	0.0711575	0.0587314
130576	LYPD6B	-0.333615	0.179453	-1.85907	0.0630167	0.722481	8.98786	4.39502	0.221848	-1.32341	0.497615	-0.980228	-2.80116	-0.351286	0.144219	-0.617119	-0.591512	0.070458	0.083996	0.396354	0.0445915
83853	ROPN1L	0.537518	0.287486	1.86972	0.0615228	0.722481	62.5132	10.6704	0.0136483	1.29187	0.252385	4.85353	0.902207	0.367485	0.106099	1.31556	0.247035	0.0809167	0.176725	0.0734691	0.0749727
79630	C1orf54	0.288585	0.154222	1.87123	0.0613127	0.722481	0	1.44138	0.695863	1.51472	0.753578	1.37941	0.42177	0.448735	0.248519	0.631622	0.103252	0.0877639	0.108759	0.209667	0.0599299
50833	TAS2R16	0.356386	0.191276	1.8632	0.0624339	0.722481	19.5655	4.97299	0.173786	0.693174	1.14848	2.84705	0.242162	0.194372	0.354171	1.00709	0.0626226	0.0786287	0.0950993	0.125126	0.0668731
56649	TMPRSS4	-0.317542	0.169941	-1.86854	0.0616863	0.722481	0	2.45341	0.48377	-0.746734	-0.0744937	0.0491976	-2.31933	-0.252024	-0.0246631	0.0291701	-0.622551	0.113907	0.109612	0.35155	0.0720487
169693	TMEM252	0.288376	0.154822	1.86262	0.0625152	0.722481	0	0.823339	0.843877	0.665329	0.380239	0.857977	1.72318	0.208365	0.112378	0.461351	0.422736	0.0980789	0.0873464	0.289142	0.0601838
6787	NEK4	0.276691	0.148676	1.86103	0.06274	0.722481	0	1.83822	0.606653	1.87182	-0.022989	0.791078	1.0824	0.595352	-0.00761891	0.387382	0.230352	0.101162	0.109837	0.239795	0.0452905
171023	ASXL1	0.364985	0.195594	1.86604	0.0620364	0.722481	44.48	7.20462	0.0656541	1.02826	0.875644	0.146521	3.75115	0.254849	0.224612	0.038107	0.921415	0.061427	0.0657976	0.0676413	0.0603367
4343	MOV10	0.275616	0.147598	1.86735	0.0618528	0.722481	0	3.08015	0.379432	1.0028	2.19704	0.894476	-0.0213301	0.270723	0.707857	0.318907	-0.00532735	0.0728818	0.103805	0.127113	0.0623788
6239	RREB1	0.372942	0.199923	1.86543	0.0621211	0.722481	38.2429	6.47699	0.0905744	1.41896	-0.428958	3.24594	1.28024	0.389918	-0.151258	0.949398	0.251566	0.0755108	0.12434	0.0855493	0.0386115
57536	KIAA1328	-0.279714	0.150126	-1.8632	0.0624342	0.722481	0	0.644532	0.886166	-1.2077	-1.3531	-0.714077	-0.562758	-0.361347	-0.437213	-0.268944	-0.138241	0.0895215	0.104405	0.141851	0.060343
94137	RP1L1	0.348235	0.186773	1.86448	0.0622544	0.722481	0	2.0508	0.56193	0.0725413	2.106	0.812817	0.652608	0.0314187	0.72096	0.46186	0.190748	0.187589	0.117194	0.322876	0.0854304
5814	PURB	-0.248853	0.13363	-1.86226	0.062566	0.722481	0	1.01318	0.798062	-1.54085	-0.304954	-0.165145	-1.40951	-0.358169	-0.0716899	-0.097457	-0.346712	0.0540324	0.0552646	0.348255	0.0605063
79843	FAM124B	-0.309857	0.165901	-1.86772	0.061801	0.722481	0	2.7757	0.427515	-0.395977	-1.01535	0.854765	-2.08464	-0.138562	-0.387777	0.498267	-0.486416	0.122446	0.14586	0.339806	0.0544444
55742	PARVA	0.458772	0.246074	1.86437	0.0622703	0.722481	63.5587	10.9765	0.0118534	3.39279	0.680577	-0.424717	3.61504	0.82524	0.179775	-0.115693	0.905999	0.0591625	0.0697758	0.0742019	0.0628101
148156	ZNF558	-0.305446	0.163904	-1.86357	0.0623828	0.722481	0	3.20084	0.361684	-1.93136	-0.295348	0.885632	-1.58884	-0.574338	-0.0957943	0.562606	-0.381019	0.0884321	0.105199	0.403555	0.0575087
164312	LRRN4	-0.263586	0.1412	-1.86676	0.0619358	0.722481	0	2.13738	0.544387	-1.64409	-1.48699	-0.841411	-0.00369248	-0.437001	-0.435216	-0.365206	-0.000846649	0.0706505	0.0856624	0.188391	0.052574
58490	RPRD1B	-0.288867	0.154672	-1.86761	0.0618166	0.722481	0	3.92163	0.270052	-1.48327	-2.37487	0.557691	-0.795308	-0.355081	-0.641145	0.185201	-0.204507	0.057308	0.072884	0.110281	0.0661221
219743	TYSND1	0.236356	0.127137	1.85908	0.0630164	0.722481	0	0.342216	0.951903	0.777077	0.374819	1.19204	1.27792	0.198112	0.119338	0.366686	0.250385	0.0649969	0.101371	0.0946247	0.0383894
9628	RGS6	0.33396	0.179062	1.86505	0.062174	0.722481	0	3.72433	0.292812	2.18649	1.43284	-0.586425	1.00781	0.719839	0.474298	-0.226594	0.265909	0.108387	0.109573	0.149305	0.0696166
27189	IL17C	0.588732	0.31452	1.87184	0.0612283	0.722481	58.1072	9.54819	0.0228242	4.24983	1.04283	-0.441526	2.04463	1.44805	0.358839	-0.209157	0.580858	0.116099	0.118405	0.224405	0.0807068
1911	PHC1	0.264553	0.142226	1.86009	0.0628731	0.722481	0	0.425592	0.934907	1.2517	0.447305	1.08238	0.97322	0.339852	0.127684	0.384014	0.245979	0.0737193	0.0814825	0.125875	0.0638816
2867	FFAR2	0.351485	0.188919	1.86051	0.0628135	0.722481	0	2.19587	0.532762	1.29157	0.0954013	1.97317	0.294424	0.4053	0.0477104	0.82861	0.10285	0.0984725	0.250103	0.176348	0.12203
64410	KLHL25	0.295636	0.157926	1.87199	0.0612078	0.722481	0	0.25145	0.968885	1.27991	0.870626	0.692772	0.93793	0.421045	0.271821	0.370156	0.226862	0.108218	0.0974774	0.285489	0.0585034
2158	F9	-0.285236	0.153398	-1.85945	0.0629639	0.722481	0	2.88204	0.410173	-1.12655	0.436374	-0.0376012	-2.20876	-0.362644	0.145593	-0.018907	-0.495031	0.103624	0.111317	0.252839	0.0502305
64793	CEP85	0.474955	0.254676	1.86494	0.0621905	0.722481	59.2477	9.81541	0.0202022	-0.292816	0.788051	3.10543	3.07351	-0.0783813	0.208704	1.17512	0.736258	0.0716531	0.0701379	0.143192	0.0573841
23378	RRP8	0.260231	0.139457	1.86603	0.0620375	0.722481	0	2.27559	0.517214	0.696051	0.0209904	0.856668	2.13046	0.158767	0.00615354	0.358471	0.552826	0.0520285	0.0859426	0.175099	0.0673335
23637	RABGAP1	-0.258284	0.138104	-1.87021	0.0614542	0.722481	0	1.62937	0.65275	-1.9213	-0.425883	-0.159545	-1.10854	-0.487907	-0.11395	-0.0484707	-0.318401	0.064489	0.0715891	0.092298	0.0824989
11075	STMN2	0.266477	0.142833	1.86566	0.0620896	0.722481	0	1.46087	0.691331	-0.117705	1.20636	1.31091	1.32435	-0.0381098	0.391729	0.531103	0.27089	0.10483	0.105444	0.164138	0.0418391
10157	AASS	-0.581951	0.312688	-1.86112	0.0627266	0.722481	72.4253	14.506	0.00229133	-2.64279	-1.8354	-3.5362	0.621512	-0.765113	-0.560045	-1.2977	0.126933	0.0838156	0.0931071	0.134671	0.041711
51557	LGSN	-0.405275	0.2179	-1.85991	0.0628986	0.722481	33.3601	6.00241	0.111493	-1.56935	-0.0772387	-2.89292	-0.860024	-0.545455	-0.0274855	-1.10853	-0.163464	0.120803	0.12663	0.146831	0.0361261
142678	MIB2	0.303934	0.162665	1.86846	0.0616981	0.722481	0	2.48415	0.478163	0.723281	2.29114	0.388488	0.227872	0.218375	0.71118	0.152147	0.0723333	0.0911572	0.0963514	0.153382	0.100762
92235	DUSP27	0.321525	0.172785	1.86084	0.0627668	0.722481	0	3.04349	0.384969	1.26461	-0.317343	0.0636938	2.21133	0.423849	-0.112006	0.031577	0.611482	0.112333	0.124572	0.245781	0.0764645
8220	ESS2	0.279048	0.150262	1.85707	0.0633006	0.724269	0	3.1614	0.367404	0.164757	2.44472	-0.10473	0.928125	0.0495455	0.678605	-0.0545517	0.208978	0.090432	0.0770509	0.271315	0.0506978
84894	LINGO1	0.374741	0.201802	1.85698	0.0633147	0.724269	26.6897	5.45626	0.141278	3.29157	1.04647	0.953957	-0.159365	0.777787	0.27917	0.510392	-0.0433321	0.055836	0.0711673	0.286253	0.0739318
149708	WFDC5	0.231666	0.124774	1.85669	0.0633555	0.724269	0	2.63471	0.451436	1.10661	2.18277	0.277793	-0.125641	0.254289	0.473321	0.137785	-0.0281203	0.0528041	0.0470216	0.246014	0.050093
283726	SAXO2	0.412188	0.221996	1.85673	0.063349	0.724269	35.3053	6.18289	0.103044	0.732791	3.56252	0.0683029	0.94943	0.199727	1.02599	0.0334269	0.242996	0.0742874	0.0829417	0.239505	0.0655047
146691	TOM1L2	-0.268646	0.144906	-1.85393	0.0637492	0.727731	0	3.74737	0.290068	-0.346613	0.711689	-1.97377	-2.0974	-0.113935	0.236099	-0.484885	-0.396383	0.108051	0.110055	0.060351	0.0357165
54965	PIGX	-0.301437	0.162589	-1.85399	0.063741	0.727731	0	2.97512	0.395477	-1.73671	0.368389	-0.219358	-1.79232	-0.642763	0.13992	-0.0770891	-0.455262	0.136977	0.14426	0.123503	0.0645196
27433	TOR2A	0.304439	0.164278	1.85319	0.0638547	0.728416	0	2.87899	0.410662	0.800117	0.0135687	-0.149493	2.3771	0.271228	0.00488545	-0.0634813	0.611877	0.114911	0.129638	0.180323	0.0662574
55662	HIF1AN	0.28238	0.152471	1.85202	0.0640228	0.729325	14.9854	4.70508	0.194711	-0.0333677	0.392474	1.23591	3.00422	-0.00789372	0.103409	0.339875	0.624205	0.0559644	0.0694219	0.0756246	0.0431709
2047	EPHB1	-0.317242	0.17156	-1.84916	0.0644352	0.729325	0	2.41555	0.490747	-0.516476	0.257779	-0.375404	-2.31534	-0.19004	0.109547	-0.158088	-0.58975	0.135391	0.180594	0.177338	0.0648794
7542	ZFPL1	0.276871	0.149699	1.84952	0.0643828	0.729325	0	0.916964	0.821332	1.09758	0.287354	1.50016	0.8944	0.338978	0.0941302	0.527717	0.218608	0.0953827	0.107306	0.123745	0.0597406
5719	PSMD13	0.243539	0.131671	1.8496	0.0643711	0.729325	0	1.80873	0.613038	1.77886	1.35077	0.141745	0.469834	0.45905	0.393494	0.0401692	0.109449	0.0665941	0.0848627	0.0803102	0.0542671
55764	IFT122	0.521512	0.28199	1.8494	0.0644003	0.729325	69.6687	13.1877	0.00424779	0.555464	5.10357	1.18111	0.97344	0.14572	1.2611	0.465884	0.207688	0.0688221	0.061059	0.155587	0.0455202
23099	ZBTB43	-0.276236	0.149347	-1.84962	0.0643685	0.729325	0	3.07053	0.380878	-0.622732	-2.38764	-0.113366	-0.68257	-0.184094	-0.747611	-0.0359052	-0.18045	0.0873931	0.0980422	0.100311	0.0698909
27429	HTRA2	0.255655	0.138219	1.84964	0.0643661	0.729325	0	1.72928	0.630444	0.495786	0.900703	1.95021	0.538557	0.119287	0.306743	0.577284	0.138896	0.0578887	0.115981	0.0876227	0.0665147
284119	CAVIN1	0.423358	0.228852	1.84992	0.064325	0.729325	20.455	5.0286	0.169715	0.26997	0.488916	3.06721	0.979483	0.101855	0.173242	1.13068	0.311661	0.14234	0.125556	0.13589	0.101245
153579	BTNL9	-0.63555	0.343196	-1.85186	0.0640465	0.729325	73.1318	14.8875	0.00191539	-2.12607	-0.720764	-5.20148	-0.24688	-0.688372	-0.294832	-1.47143	-0.0608176	0.104831	0.167326	0.0800251	0.0606858
2589	GALNT1	0.235881	0.127462	1.8506	0.0642266	0.729325	0	1.93519	0.585966	1.24166	-0.303429	1.07495	1.60332	0.346635	-0.0814285	0.26054	0.379886	0.0779361	0.0720178	0.0587456	0.0561392
29119	CTNNA3	-0.217016	0.117307	-1.84999	0.0643157	0.729325	0	3.05726	0.38288	0.089918	-0.465871	-0.069482	-2.52995	0.0212342	-0.11001	-0.0294418	-0.439243	0.0557673	0.0557613	0.179549	0.0301429
6770	STAR	-0.328088	0.177545	-1.84791	0.0646147	0.730324	20.6101	5.03842	0.169005	-2.91943	-1.66603	-0.140819	0.00694596	-0.718589	-0.418297	-0.0594513	0.00162367	0.0605852	0.0630383	0.178238	0.0546424
284274	SMIM21	0.278558	0.150719	1.8482	0.0645736	0.730324	0	3.53978	0.315639	1.8988	-0.375236	1.2774	1.45139	0.556996	-0.0928961	0.508554	0.332823	0.0860493	0.0612893	0.158498	0.0525846
2642	GCGR	0.33329	0.180404	1.84747	0.0646795	0.73054	6.8157	4.29257	0.231556	2.38819	-0.0528709	-0.0769988	1.98369	0.616871	-0.0135544	-0.0377883	0.572539	0.0667192	0.0657241	0.24085	0.0833035
118812	MORN4	-0.307768	0.166724	-1.84598	0.0648957	0.73117	1.2243	4.04958	0.25616	-1.75038	-2.43536	0.120481	0.00871192	-0.444708	-0.635552	0.0616266	0.00209494	0.0645482	0.0681046	0.261635	0.057825
8825	LIN7A	0.446987	0.242107	1.84624	0.0648575	0.73117	28.3497	5.58267	0.133777	0.59177	-0.0929221	3.0806	1.47477	0.196211	-0.039409	1.18866	0.437799	0.109936	0.179867	0.148883	0.0881247
115098	CCDC124	0.312018	0.169025	1.84599	0.0648937	0.73117	0	1.79007	0.617098	0.320032	1.90324	0.26561	1.18425	0.112674	0.632632	0.087301	0.403174	0.123955	0.110488	0.108031	0.115904
9498	SLC4A8	0.291426	0.157884	1.84582	0.0649178	0.73117	0	3.72446	0.292795	0.864339	2.27339	1.34952	-0.197972	0.244121	0.616012	0.493467	-0.0479981	0.0797707	0.073423	0.133709	0.0587817
57544	TXNDC16	-0.322606	0.174845	-1.8451	0.0650233	0.731329	0	0.661733	0.882166	-0.710894	-1.57104	-0.654146	-0.815277	-0.272979	-0.594433	-0.242897	-0.238437	0.147451	0.143163	0.137878	0.0855334
148479	PHF13	-0.309665	0.167805	-1.84539	0.064981	0.731329	17.0702	4.82336	0.185198	-1.88876	-0.195823	0.0847194	-2.63401	-0.45557	-0.0461984	0.0280299	-0.702451	0.0581777	0.0556579	0.109465	0.0711212
56262	LRRC8A	0.261569	0.141893	1.84343	0.0652666	0.73355	0	2.13801	0.544262	2.10806	0.927143	0.342688	0.339541	0.617332	0.250379	0.11235	0.0876923	0.0857574	0.0729294	0.107485	0.0667018
113235	SLC46A1	-0.389185	0.211227	-1.8425	0.0654027	0.733642	38.5938	6.514	0.0891122	-0.285548	-0.903384	-0.509854	-3.82508	-0.0807406	-0.263952	-0.175696	-0.916251	0.0799511	0.0853697	0.118749	0.0573784
84076	TKTL2	0.255046	0.138542	1.84093	0.0656323	0.733642	0	0.877388	0.830881	0.513248	0.910998	0.465757	1.71934	0.131057	0.214064	0.209397	0.464439	0.065203	0.0552143	0.202127	0.0729683
50832	TAS2R4	0.467153	0.253768	1.84087	0.0656412	0.733642	60.4684	10.1185	0.0175853	1.80181	2.90252	-1.46948	4.04251	0.438121	0.669836	-0.710548	0.95345	0.0591247	0.0532582	0.233809	0.0556281
23600	AMACR	0.363025	0.197166	1.84121	0.0655907	0.733642	4.20485	4.17558	0.243119	-0.165991	-0.103243	1.59197	2.87833	-0.0601136	-0.043682	0.645481	0.628886	0.131153	0.179011	0.164399	0.0477379
84153	RNASEH2C	-0.439538	0.238735	-1.84111	0.0656047	0.733642	42.374	6.94131	0.0737922	0.139758	-0.794162	-3.60078	-1.39518	0.0453579	-0.301096	-1.07364	-0.372712	0.105331	0.143744	0.0889045	0.0713655
8458	TTF2	-0.295503	0.160514	-1.84098	0.0656246	0.733642	0	1.57574	0.664904	-0.0240374	-1.39329	-1.33728	-1.11121	-0.00720736	-0.478139	-0.539715	-0.307496	0.0899037	0.117767	0.162887	0.076575
126069	ZNF491	-0.244031	0.132473	-1.84213	0.0654565	0.733642	0	2.00605	0.571152	-0.965975	0.131309	-0.219395	-2.09786	-0.248804	0.0350502	-0.106286	-0.431708	0.0663413	0.0712517	0.234695	0.0423475
11093	ADAMTS13	0.231954	0.125959	1.8415	0.0655482	0.733642	0	1.93305	0.586417	1.17144	0.188816	-0.114621	1.97563	0.291276	0.0491206	-0.0385487	0.409838	0.0618261	0.0676784	0.113109	0.0430339
51052	PRLH	0.256887	0.139583	1.84039	0.065711	0.73391	0	2.63707	0.451027	1.498	-0.341777	0.466927	1.85615	0.402488	-0.0887005	0.228319	0.432192	0.0721912	0.0673546	0.239104	0.054216
390066	OR52D1	0.330027	0.179424	1.83938	0.0658599	0.735061	0	3.25889	0.353406	0.753847	2.44253	-0.087866	0.641735	0.245767	0.877701	-0.0435897	0.177772	0.106287	0.129126	0.246108	0.0767389
10637	LEFTY1	-0.318843	0.173822	-1.83431	0.0666079	0.735822	0	1.74713	0.626506	-0.526711	-1.23913	-1.70028	-0.638749	-0.187791	-0.452612	-0.877423	-0.170834	0.127117	0.13342	0.266302	0.0715297
4062	LY6H	0.351374	0.191712	1.83282	0.0668292	0.735822	30.4433	5.7507	0.124389	-0.11176	0.801626	0.657523	4.12573	-0.031448	0.2233	0.326125	0.694569	0.0791802	0.0775948	0.246007	0.0283419
4166	CHST6	-0.245181	0.133406	-1.83785	0.0660839	0.735822	0	0.89949	0.825551	-0.890857	-0.23381	-1.02531	-1.54196	-0.233354	-0.0599815	-0.431683	-0.338274	0.0686145	0.0658127	0.177263	0.0481272
5516	PPP2CB	0.326941	0.178242	1.83425	0.0666171	0.735822	0	1.25716	0.739331	0.786087	-0.306502	1.02031	1.69373	0.28866	-0.147582	0.445553	0.444754	0.134844	0.231846	0.190692	0.068953
140733	MACROD2	0.23912	0.130356	1.83437	0.0665995	0.735822	5.09906	4.21492	0.239172	2.32304	1.77014	0.414377	-0.109213	0.505191	0.378766	0.127054	-0.0191565	0.0472929	0.0457855	0.0940129	0.0307671
126282	TNFAIP8L1	-0.432266	0.235678	-1.83414	0.066633	0.735822	30.6951	5.7716	0.123267	0.601304	-1.57996	-3.11541	-1.00236	0.235913	-0.581397	-0.903132	-0.322477	0.153927	0.135412	0.0840372	0.103503
922	CD5L	0.264402	0.143824	1.83838	0.0660068	0.735822	0	0.835119	0.84105	1.39478	1.36848	0.594545	0.207642	0.328113	0.399334	0.248979	0.0579756	0.0553392	0.0851523	0.17537	0.077958
4744	NEFH	-0.315742	0.172288	-1.83264	0.0668567	0.735822	0	3.23081	0.357389	-0.211331	0.218198	-1.67007	-2.01226	-0.0690292	0.0799724	-0.655821	-0.552861	0.106694	0.134332	0.154205	0.0754854
64332	NFKBIZ	0.421273	0.229789	1.8333	0.0667577	0.735822	50.7171	8.1164	0.0436663	2.46648	-0.640072	0.762037	3.73404	0.663075	-0.19513	0.262296	0.814568	0.0722722	0.0929376	0.118476	0.0475881
55281	TMEM140	-0.321452	0.174974	-1.83714	0.06619	0.735822	0.291359	4.01169	0.260205	0.124337	-0.525705	-1.33217	-2.53296	0.0349509	-0.172434	-0.408637	-0.755361	0.0790158	0.107587	0.0940929	0.0889308
23024	PDZRN3	-0.390642	0.212674	-1.83681	0.0662382	0.735822	48.6609	7.79133	0.0505271	-0.746751	-3.0201	-2.80814	0.484825	-0.163251	-0.602894	-0.97196	0.160944	0.0477925	0.0398512	0.1198	0.110199
6019	RLN2	-0.365794	0.19938	-1.83466	0.0665566	0.735822	22.778	5.17987	0.15909	-0.842973	-2.62577	0.945202	-2.12544	-0.259835	-0.763483	0.432635	-0.471181	0.0950098	0.0845444	0.209505	0.0491446
6744	SSFA2	0.363479	0.198312	1.83287	0.0668224	0.735822	0	2.58791	0.459614	0.38709	-0.607719	1.11629	2.045	0.16179	-0.338407	0.485197	0.611469	0.174695	0.310081	0.18892	0.0894048
51520	LARS	-0.223532	0.121989	-1.83239	0.0668929	0.735822	0	1.59981	0.659433	-1.66101	0.0342676	-1.21535	-0.848687	-0.385972	0.00791854	-0.306316	-0.225147	0.0539966	0.0533978	0.0635241	0.0703781
5587	PRKD1	-0.242398	0.132242	-1.83298	0.0668049	0.735822	0	0.99178	0.803241	-1.30724	-0.563711	0.00286956	-1.52478	-0.309854	-0.13279	0.00116331	-0.39011	0.0561825	0.0554904	0.164346	0.0654577
84752	B3GNT9	-0.38994	0.212582	-1.83431	0.0666085	0.735822	38.9609	6.55318	0.0875886	0.245779	-0.509333	-2.50038	-2.69098	0.0726113	-0.136336	-0.848546	-0.692006	0.0872806	0.0716506	0.11517	0.06613
2900	GRIK4	-0.258951	0.141299	-1.83265	0.0668545	0.735822	0	3.4993	0.320853	-1.56166	0.128771	-1.89155	-1.17955	-0.443913	0.0346807	-0.893011	-0.206535	0.0808021	0.0725342	0.222884	0.0306586
51360	MBTPS2	0.368458	0.200652	1.8363	0.066313	0.735822	32.9246	5.96344	0.113402	1.60749	-0.829875	2.4415	2.15543	0.451264	-0.278875	0.913007	0.409884	0.0788071	0.112926	0.139841	0.0361623
93474	ZNF670	-0.244616	0.133289	-1.83523	0.0664715	0.735822	0	2.52915	0.470046	0.0145677	-2.19281	-0.538101	-0.893898	0.00416342	-0.590108	-0.257203	-0.175784	0.0816807	0.0724206	0.228468	0.0386706
79666	PLEKHF2	0.373351	0.203377	1.83576	0.066393	0.735822	4.59498	4.19265	0.241399	0.221321	-0.519974	1.88454	2.58346	0.0845067	-0.227767	0.741696	0.593061	0.145793	0.191876	0.154896	0.052698
150383	CDPF1	0.274887	0.149659	1.83676	0.0662457	0.735822	0	2.95101	0.39924	2.12612	-0.491301	0.119248	1.24447	0.568842	-0.186642	0.051792	0.289749	0.0715828	0.144319	0.188634	0.0542091
6564	SLC15A1	-0.369378	0.20271	-1.8222	0.0684251	0.737029	2.82266	4.11619	0.249188	-0.372538	0.541897	-2.06851	-2.25062	-0.137748	0.236507	-0.841329	-0.531579	0.136718	0.190482	0.165431	0.055787
151647	FAM19A4	-0.359709	0.196923	-1.82665	0.0677531	0.737029	47.9484	7.68469	0.0529982	-0.113827	-0.679512	-1.50111	-3.83806	-0.0243546	-0.14771	-0.735619	-0.719987	0.0457793	0.0472523	0.24015	0.0351904
10581	IFITM2	0.260078	0.142366	1.82683	0.0677257	0.737029	0	1.41944	0.700985	0.403865	1.6125	1.39446	0.221273	0.0922013	0.456149	0.401909	0.0933582	0.0521198	0.0800231	0.0830696	0.178012
56898	BDH2	-0.297471	0.163155	-1.82325	0.0682661	0.737029	0.532421	4.02141	0.259161	-2.26574	0.486499	-0.517286	-1.80672	-0.553056	0.132084	-0.214437	-0.453272	0.0595823	0.0737116	0.171845	0.0629415
9564	BCAR1	0.236978	0.13007	1.82192	0.0684664	0.737029	0	0.759938	0.859023	1.30284	0.671945	-0.0937088	1.38624	0.336965	0.1622	-0.0395108	0.29986	0.0668935	0.0582686	0.177775	0.0467908
9552	SPAG7	0.240486	0.131564	1.8279	0.0675643	0.737029	0	0.981425	0.805747	0.286838	0.909863	0.576696	1.75498	0.0704528	0.249792	0.197178	0.398701	0.0603287	0.0753712	0.116903	0.0516122
130916	MTERF4	0.277274	0.15162	1.82875	0.0674376	0.737029	0	0.484084	0.922374	0.298113	1.03866	0.769862	1.43806	0.101697	0.379863	0.226585	0.360801	0.116373	0.133754	0.0866236	0.0629479
10426	TUBGCP3	0.452333	0.247132	1.83033	0.067201	0.737029	53.6691	8.63356	0.0345814	0.630356	-0.387888	2.26416	3.91337	0.189223	-0.127251	0.672723	0.966815	0.0901103	0.107624	0.0882787	0.0610359
64409	GALNT17	0.260088	0.142484	1.82538	0.0679435	0.737029	0	3.17987	0.364715	0.273778	0.00780272	1.57054	2.06286	0.0739422	0.00212239	0.770459	0.442492	0.0729434	0.0739873	0.24066	0.0460119
80781	COL18A1	-0.260904	0.14288	-1.82603	0.0678452	0.737029	0	3.12081	0.373371	0.0351565	-1.04379	-2.23601	-0.692063	0.0101383	-0.264861	-0.755005	-0.180248	0.08316	0.0643886	0.114012	0.0678341
5205	ATP8B1	0.292271	0.15964	1.83081	0.0671287	0.737029	0	2.92547	0.403259	1.693	1.00233	-0.687977	1.39036	0.557868	0.34795	-0.255777	0.365179	0.108579	0.120506	0.138221	0.0689854
5763	PTMS	0.347565	0.190746	1.82213	0.0684345	0.737029	0	2.54167	0.467808	0.387412	2.14995	1.00574	0.279228	0.175208	0.878929	0.397471	0.0873898	0.204531	0.167129	0.156185	0.0979501
3284	HSD3B2	-0.370049	0.202944	-1.8234	0.0682428	0.737029	32.6089	5.9355	0.114791	-3.05842	0.111728	-0.523403	-1.6654	-0.818065	0.0253182	-0.257441	-0.429366	0.0715455	0.0513504	0.241926	0.0664692
28960	DCPS	0.347934	0.190378	1.82759	0.0676104	0.737029	27.5397	5.52027	0.137431	0.645113	2.21784	2.39063	-0.256269	0.166482	0.62632	0.759243	-0.0690945	0.0665982	0.0797501	0.100864	0.0726931
55967	NDUFA12	0.283234	0.154991	1.82742	0.0676372	0.737029	0	3.19046	0.363181	0.871034	-0.744608	2.07276	1.12574	0.283096	-0.272441	0.510834	0.336681	0.105632	0.133872	0.0607383	0.0894463
30818	KCNIP3	-0.358264	0.196521	-1.82303	0.0682989	0.737029	51.803	8.29928	0.040215	-1.18048	0.0637106	-3.3968	-1.48168	-0.258175	0.0142666	-1.14651	-0.289102	0.0478309	0.0501435	0.113923	0.0380708
51430	SUCO	0.219124	0.120335	1.82094	0.0686158	0.737029	0	1.83454	0.607448	-0.0758483	0.936705	1.5283	1.38978	-0.0203477	0.237247	0.64602	0.238424	0.071968	0.0641499	0.17868	0.029431
51629	SLC25A39	0.262704	0.144018	1.8241	0.0681369	0.737029	0	0.905689	0.824055	1.3728	0.265456	1.44209	0.445381	0.473081	0.0851801	0.323208	0.139641	0.118757	0.102966	0.0502316	0.098302
1192	CLIC1	0.281965	0.154883	1.8205	0.0686825	0.737029	21.5944	5.10167	0.164502	1.10884	2.48741	1.82438	-0.676528	0.230575	0.52914	0.505534	-0.178576	0.0432399	0.0452527	0.0767841	0.069675
122970	ACOT4	-0.316193	0.17367	-1.82065	0.0686599	0.737029	0	1.4245	0.699801	-1.78551	-0.387571	-0.885696	-0.785212	-0.656296	-0.141661	-0.532112	-0.199458	0.135106	0.133598	0.360942	0.0645253
57599	WDR48	-0.248825	0.136611	-1.82142	0.0685429	0.737029	0	2.50196	0.474937	-0.711854	0.308046	-1.45091	-1.7643	-0.190347	0.0870056	-0.377449	-0.503348	0.0715005	0.0797745	0.0676763	0.0813933
9104	RGN	-0.438844	0.241002	-1.82092	0.0686196	0.737029	63.4081	10.9314	0.0121028	-0.208018	-1.23743	-0.771411	-5.65516	-0.0491842	-0.293396	-0.392617	-0.920334	0.0559049	0.0562169	0.25904	0.0264851
51512	GTSE1	0.31071	0.169895	1.82883	0.0674244	0.737029	0	0.0531144	0.996796	0.998664	0.720659	0.721073	1.16667	0.371723	0.253837	0.316361	0.309911	0.138548	0.124066	0.19249	0.0705627
4802	NFYC	0.236724	0.129662	1.8257	0.0678953	0.737029	0	0.191644	0.978927	0.845741	0.941445	1.09856	0.846409	0.183054	0.22776	0.349557	0.253228	0.0468472	0.058528	0.101249	0.0895082
818	CAMK2G	-0.251318	0.137591	-1.82655	0.0677676	0.737029	0	2.33704	0.505462	-1.20627	0.0576845	-0.321053	-2.02777	-0.3205	0.0166726	-0.0936128	-0.524896	0.0705943	0.0835383	0.0850189	0.0670053
166378	SPATA5	0.246848	0.135559	1.82096	0.0686127	0.737029	0	1.28573	0.732524	0.469062	1.22014	-0.302213	1.67378	0.130148	0.318396	-0.131862	0.361054	0.0769871	0.0680946	0.190376	0.0465316
23239	PHLPP1	0.278905	0.152418	1.82987	0.0672695	0.737029	0	0.596347	0.897268	0.284175	0.353202	1.01502	1.6459	0.101505	0.134143	0.351632	0.368568	0.127585	0.144241	0.120014	0.0501447
55511	SAGE1	0.370758	0.20333	1.82343	0.0682387	0.737029	33.3059	5.99753	0.11173	2.76076	2.05709	0.762473	-0.361615	0.725712	0.499897	0.412699	-0.0829725	0.0690989	0.0590547	0.292967	0.0526471
10411	RAPGEF3	0.273796	0.150192	1.82298	0.0683069	0.737029	0	1.51629	0.678516	0.150356	1.83787	0.506712	1.08739	0.0464088	0.575716	0.194064	0.265091	0.0952702	0.0981269	0.146679	0.0594319
2770	GNAI1	0.317185	0.17335	1.82974	0.0672888	0.737029	25.5996	5.37631	0.146226	3.01345	0.0250024	0.209759	1.60885	0.742749	0.00516333	0.11922	0.322008	0.0607513	0.0426476	0.323041	0.0400595
3578	IL9	0.248211	0.136353	1.82035	0.0687054	0.737029	0	0.844244	0.838858	1.53384	0.701946	-0.207453	1.12671	0.407206	0.179991	-0.118017	0.244141	0.0704801	0.06575	0.32363	0.046952
7098	TLR3	-0.359502	0.197417	-1.82102	0.0686031	0.737029	52.0716	8.34579	0.0393805	-0.970667	-0.562973	-0.403865	-4.34323	-0.21665	-0.135918	-0.118203	-0.873976	0.0498168	0.0582876	0.0856615	0.0404923
590	BCHE	0.347749	0.190737	1.82319	0.0682752	0.737029	39.6485	6.62784	0.0847549	0.607119	-0.110302	3.01801	2.10323	0.164808	-0.0288262	1.05736	0.374529	0.0736902	0.0682978	0.122745	0.0317101
610	HCN2	-0.2454	0.134159	-1.82917	0.0673746	0.737029	0	2.66499	0.44621	-1.72474	-0.137172	0.526058	-1.65546	-0.415009	-0.0368798	0.223155	-0.380828	0.0578985	0.0722852	0.179948	0.0529198
92283	ZNF461	0.312853	0.170957	1.83001	0.0672486	0.737029	0	3.5201	0.318165	0.6231	1.41734	-0.878839	2.19162	0.182457	0.469312	-0.435878	0.53495	0.0857447	0.109642	0.245987	0.0595791
80195	TMEM254	-0.274379	0.150831	-1.81912	0.0688938	0.738556	0	0.688576	0.875888	-1.28718	-0.833704	0.0386715	-1.28233	-0.350841	-0.239543	0.0159202	-0.362955	0.0742917	0.0825552	0.16948	0.080114
1582	CYP8B1	0.277668	0.152973	1.81515	0.0695009	0.739059	0	1.53544	0.674116	1.50214	0.534315	-0.373094	1.46598	0.447509	0.151962	-0.186041	0.377486	0.0887532	0.0808859	0.248645	0.0663051
3316	HSPB2	0.364839	0.20084	1.81657	0.0692831	0.739059	13.6847	4.63417	0.20063	1.64066	-0.363926	2.41264	0.92823	0.513717	-0.123438	0.935163	0.251106	0.0980415	0.115047	0.150241	0.0731819
115939	TSR3	-0.301631	0.166075	-1.81624	0.0693339	0.739059	0	1.12322	0.771472	-0.318219	-0.303983	-0.468596	-2.00217	-0.124094	-0.156697	-0.15082	-0.496455	0.152073	0.265718	0.103591	0.0614834
11027	LILRA2	0.292821	0.161151	1.81707	0.0692067	0.739059	0	1.36875	0.712876	0.315922	0.704347	1.76649	0.976773	0.100305	0.231437	0.659343	0.280262	0.100806	0.107968	0.139316	0.0823267
140856	SCP2D1	-0.276456	0.152074	-1.8179	0.069079	0.739059	0	0.994384	0.802611	0.0181521	-0.981007	-0.84213	-1.62089	0.00594069	-0.308993	-0.431755	-0.362262	0.107107	0.0992094	0.262855	0.0499506
84654	SPZ1	-0.310205	0.170865	-1.8155	0.0694473	0.739059	0	3.67928	0.298243	0.580493	-1.77357	-0.0920047	-2.26941	0.199326	-0.518005	-0.04662	-0.495803	0.117905	0.0853042	0.256758	0.0477301
53938	PPIL3	0.223888	0.123258	1.81641	0.0693074	0.739059	0	0.69509	0.874358	0.922559	0.120252	0.770537	1.59221	0.235137	0.0322	0.330662	0.285736	0.0649612	0.0717019	0.184154	0.0322055
22832	CEP162	-0.311982	0.171901	-1.81489	0.0695406	0.739059	0	2.20287	0.531384	-0.225737	-0.542196	-0.194485	-2.2614	-0.0688013	-0.212899	-0.09831	-0.635149	0.0928938	0.154183	0.25552	0.0788851
222546	RFX6	-0.370483	0.203838	-1.81754	0.0691351	0.739059	29.4607	5.6706	0.128784	-3.155	-1.37663	0.549342	-0.935562	-0.845055	-0.437384	0.252852	-0.198425	0.0717419	0.100947	0.21186	0.044983
4051	CYP4F3	0.447697	0.246679	1.8149	0.0695394	0.739059	22.3496	5.1513	0.161048	0.182125	-0.197698	2.84203	1.9288	0.0758787	-0.0900251	1.11163	0.533754	0.173581	0.207359	0.15299	0.0765785
9563	H6PD	0.280696	0.154576	1.8159	0.0693853	0.739059	0	3.34648	0.341226	1.72384	1.34918	-0.686084	1.36117	0.535953	0.449346	-0.223691	0.31578	0.0966626	0.110923	0.106302	0.05382
154141	MBOAT1	0.243483	0.134034	1.81658	0.0692819	0.739059	0	1.50305	0.681567	0.662005	0.261211	1.72386	1.15101	0.187858	0.0814424	0.661006	0.225053	0.0805264	0.0972117	0.147031	0.0382303
6756	SSX1	-0.382742	0.210863	-1.81512	0.0695056	0.739059	45.0828	7.28369	0.0633847	-1.45222	-2.40763	1.37034	-3.37348	-0.36127	-0.658913	0.615568	-0.636131	0.0618867	0.0748993	0.201789	0.0355581
4046	LSP1	0.235652	0.129996	1.81277	0.0698674	0.740002	0	1.28719	0.732177	0.502175	0.454034	0.503081	1.96517	0.11349	0.139821	0.163734	0.443758	0.0510747	0.0948353	0.105926	0.0509907
5281	PIGF	-0.41408	0.228539	-1.81186	0.0700083	0.740002	48.6855	7.79507	0.0504423	-1.19809	-1.95624	0.778836	-3.66752	-0.330475	-0.584514	0.26451	-0.853478	0.0760853	0.089278	0.115343	0.0541553
127002	ATXN7L2	-0.396247	0.218771	-1.81124	0.0701036	0.740002	14.3977	4.67277	0.197387	-0.386831	0.377245	-1.48429	-3.15614	-0.136118	0.15325	-0.764137	-0.704487	0.123819	0.165027	0.265038	0.0498233
57447	NDRG2	0.396332	0.218794	1.81144	0.0700727	0.740002	50.3241	8.05219	0.0449453	-0.736803	2.47678	1.6884	2.46009	-0.166969	0.683628	0.623099	0.558102	0.0513532	0.0761842	0.136195	0.0514668
23264	ZC3H7B	-0.29674	0.163792	-1.81169	0.0700338	0.740002	0	3.98353	0.263248	-1.69359	-2.3464	0.27092	-0.311725	-0.453352	-0.644264	0.0824967	-0.0914114	0.0716559	0.0753919	0.0927238	0.0859921
480	ATP1A4	0.3746	0.206558	1.81353	0.0697496	0.740002	58.4752	9.63279	0.0219598	3.82526	2.43917	-0.574245	0.934247	0.862642	0.544752	-0.172744	0.177102	0.0508556	0.0498785	0.0904926	0.0359354
84659	RNASE7	-0.253722	0.140015	-1.81211	0.0699685	0.740002	0	3.59755	0.308328	-0.76332	-0.335765	-2.36513	-1.00398	-0.160829	-0.0791932	-0.891588	-0.256832	0.0443931	0.0556296	0.142108	0.0654412
51138	COPS4	-0.255972	0.141268	-1.81197	0.0699915	0.740002	0	3.54686	0.314736	-1.24549	-1.93324	-1.38895	0.503479	-0.274715	-0.459174	-0.533245	0.127784	0.04865	0.0564138	0.147394	0.0644153
11067	DEPP1	0.339006	0.186944	1.81341	0.0697683	0.740002	0	1.79544	0.615928	1.40705	-0.210437	0.534166	1.66568	0.569624	-0.086822	0.217287	0.51175	0.163892	0.170222	0.165468	0.0943913
54910	SEMA4C	-0.290312	0.160073	-1.81362	0.0697369	0.740002	0	0.478675	0.923551	-1.41028	-0.855496	-0.908121	-0.471612	-0.402668	-0.295767	-0.362657	-0.135448	0.0815231	0.119526	0.15948	0.0824845
146862	UNC45B	-0.36805	0.203228	-1.81102	0.0701376	0.740002	40.629	6.7373	0.0807594	-2.42094	-2.66414	-0.506911	0.16195	-0.712372	-0.567914	-0.287483	0.0298351	0.0865857	0.0454413	0.321632	0.0339384
23026	MYO16	-0.242713	0.134085	-1.81014	0.0702746	0.74096	0	1.34376	0.71877	-1.19788	-1.70227	0.231132	-0.484058	-0.280556	-0.413744	0.102919	-0.123269	0.0548549	0.0590758	0.198278	0.0648503
154197	PNLDC1	0.281646	0.155682	1.80911	0.0704337	0.74154	0	0.827614	0.842851	0.889071	0.737462	1.11287	1.23601	0.236839	0.178931	0.637871	0.462659	0.0709633	0.0588696	0.32853	0.140113
2308	FOXO1	-0.251996	0.13931	-1.80889	0.0704685	0.74154	0	1.78167	0.618932	-1.24121	0.262839	-0.968354	-1.58314	-0.337962	0.0751692	-0.302325	-0.401432	0.0741383	0.0817898	0.097472	0.0642961
192669	AGO3	-0.314256	0.173679	-1.80941	0.0703877	0.74154	16.5154	4.7913	0.187732	-2.73307	-1.07053	-0.968809	0.133078	-0.73121	-0.311475	-0.326389	0.0296662	0.0715784	0.0846546	0.1135	0.0496948
2018	EMX2	-0.245581	0.135871	-1.80746	0.0706903	0.743385	0	0.715175	0.869629	-1.22743	-0.087906	-0.745997	-1.38249	-0.324587	-0.0260315	-0.334438	-0.285248	0.0699312	0.0876924	0.200982	0.0425717
55304	SPTLC3	0.231665	0.128214	1.80686	0.0707841	0.743883	0	1.16787	0.760721	1.00546	0.696293	-0.489389	1.64235	0.277479	0.1754	-0.24276	0.311052	0.0761597	0.0634564	0.246063	0.03587
5860	QDPR	-0.235411	0.130384	-1.80553	0.0709923	0.744142	0	0.930173	0.818141	-0.752458	-1.62271	-0.0726937	-0.992684	-0.175313	-0.402241	-0.0241484	-0.255751	0.0542832	0.0614452	0.110353	0.0663762
444	ASPH	0.326987	0.18102	1.80636	0.0708615	0.744142	30.8119	5.78134	0.122747	0.243768	-0.188216	2.38947	2.94144	0.0642087	-0.0560283	0.889223	0.481357	0.0693802	0.0886134	0.13849	0.0267803
140	ADORA3	-0.313064	0.17339	-1.80555	0.0709893	0.744142	0	2.88854	0.409132	-0.566215	-1.99287	-1.36084	0.0671254	-0.181892	-0.686743	-0.601257	0.0211971	0.103196	0.118748	0.195213	0.0997195
3667	IRS1	-0.242936	0.134597	-1.80491	0.0710886	0.744142	0	1.89122	0.595289	-1.63273	-1.25259	-0.857323	-0.423227	-0.509366	-0.416276	-0.3513	-0.0773817	0.0973259	0.110445	0.167906	0.0334296
54916	TMEM260	0.395036	0.218921	1.80447	0.0711572	0.744142	21.2688	5.08058	0.165991	1.28656	-0.846492	2.60127	1.63036	0.502475	-0.385869	0.880251	0.362678	0.152535	0.207795	0.114509	0.0494852
282808	RAB40AL	0.285336	0.15814	1.80432	0.0711804	0.744142	0	0.585369	0.899773	0.819097	0.553176	0.126556	1.68761	0.274064	0.169703	0.0664468	0.411717	0.111952	0.0941135	0.275665	0.0595189
6671	SP4	-0.37086	0.205452	-1.80509	0.0710601	0.744142	10.8131	4.48497	0.213635	-2.0217	0.20444	-2.21573	-0.356437	-0.684925	0.100789	-0.767613	-0.085429	0.114776	0.243051	0.120019	0.057444
1070	CETN3	0.276077	0.152924	1.80533	0.0710238	0.744142	0	1.71057	0.634587	1.00937	0.920415	1.71449	0.405323	0.298549	0.282419	0.777751	0.10181	0.087484	0.0941503	0.205784	0.0630919
5826	ABCD4	-0.265941	0.14742	-1.80396	0.0712375	0.744253	0	2.11806	0.548267	-0.251525	-0.966477	-1.92965	-0.807127	-0.0714373	-0.292933	-0.758728	-0.200144	0.0806657	0.0918657	0.154602	0.0614897
55857	KIZ	0.2909	0.161341	1.80302	0.0713854	0.745312	0	0.579567	0.901094	0.420475	0.463321	0.823165	1.66174	0.149103	0.178495	0.264261	0.443759	0.125745	0.148418	0.10306	0.071313
7264	TSTA3	0.317542	0.176237	1.80179	0.0715787	0.746559	0	1.72071	0.632339	0.869522	1.49831	-0.261303	1.37763	0.328976	0.557547	-0.0994181	0.413862	0.143142	0.138471	0.144758	0.0902499
147409	DSG4	-0.276435	0.153433	-1.80167	0.0715981	0.746559	0	1.53295	0.674687	-1.70092	-0.0283851	-0.993923	-0.947171	-0.493096	-0.00879473	-0.502794	-0.234933	0.0840418	0.0959985	0.255903	0.0615222
170680	PSORS1C2	0.274349	0.152757	1.79598	0.0724979	0.751274	0	2.94905	0.399547	-0.539572	0.935116	1.41456	1.73437	-0.172258	0.27384	0.586681	0.439562	0.101921	0.0857559	0.172013	0.0642329
4232	MEST	-0.241007	0.13428	-1.79481	0.0726838	0.751274	0	3.22486	0.358238	0.0484541	-1.42738	0.477832	-2.15621	0.0117044	-0.386902	0.225836	-0.424083	0.05835	0.0734718	0.223376	0.0386829
1315	COPB1	-0.365699	0.2036	-1.79616	0.0724687	0.751274	49.5265	7.92495	0.0475885	-2.36242	-2.98609	-1.46354	0.906044	-0.616974	-0.717512	-0.326713	0.255747	0.0682057	0.0577368	0.0498337	0.0796752
245938	DEFB125	0.28535	0.158667	1.79843	0.0721094	0.751274	0	0.836502	0.840718	0.581444	0.667265	0.0346981	1.81282	0.190566	0.234339	0.0158375	0.433291	0.107417	0.123337	0.208336	0.0571282
84221	SPATC1L	0.474378	0.264402	1.79415	0.072789	0.751274	22.4334	5.15686	0.160665	1.40752	1.83261	-1.12273	2.52634	0.565672	0.822742	-0.619194	0.701765	0.161519	0.201553	0.304159	0.0771611
3131	HLF	0.25106	0.139653	1.79774	0.0722188	0.751274	0	2.76063	0.430022	2.2422	0.973144	0.115534	-0.0682822	0.539145	0.268687	0.0467343	-0.0177798	0.0578179	0.0762322	0.163625	0.0678011
8790	FPGT	-0.459012	0.255848	-1.79408	0.0728008	0.751274	49.0508	7.85096	0.0491945	-3.08586	-2.42371	1.12071	-1.53931	-0.936338	-0.734484	0.504969	-0.384216	0.092069	0.0918342	0.203022	0.0623015
9533	POLR1C	-0.24286	0.13531	-1.79485	0.072678	0.751274	0	2.45178	0.484068	0.0857272	-1.93739	-1.11634	-0.816227	0.0210297	-0.542997	-0.357448	-0.207207	0.0601768	0.0785528	0.102526	0.0644447
4350	MPG	-0.217441	0.121137	-1.795	0.072653	0.751274	0	3.43117	0.3298	-1.30212	0.75307	-1.03263	-2.04375	-0.310891	0.186828	-0.330055	-0.332789	0.057005	0.0615476	0.10216	0.0265144
85461	TANC1	-0.299466	0.16687	-1.79461	0.0727159	0.751274	0	2.13649	0.544566	0.315294	-1.47497	-1.28524	-1.19596	0.103356	-0.487143	-0.493982	-0.366136	0.107459	0.109081	0.147724	0.0937237
317671	RFESD	0.366656	0.204327	1.79445	0.072741	0.751274	0	2.14164	0.543536	1.99852	0.645105	0.959778	0.17401	0.896737	0.288285	0.38363	0.0626328	0.201332	0.199703	0.159765	0.129555
81031	SLC2A10	-0.510822	0.284509	-1.79545	0.0725815	0.751274	68.0758	12.5297	0.00577237	-3.97838	-3.64794	0.731967	-0.81648	-1.06087	-0.910345	0.304704	-0.185455	0.0711064	0.0622754	0.17329	0.0515923
84318	CCDC77	0.232698	0.129458	1.79748	0.0722589	0.751274	0	2.38477	0.496477	0.818825	0.441189	2.16982	0.20609	0.183228	0.112845	0.603432	0.06082	0.0500727	0.065421	0.0773409	0.0870925
22849	CPEB3	0.363415	0.202548	1.79422	0.0727782	0.751274	33.4009	6.00609	0.111314	-0.680123	1.04915	2.59369	2.26135	-0.21183	0.326972	0.892268	0.459171	0.0970065	0.0971279	0.118346	0.0412299
26973	CHORDC1	0.533456	0.29674	1.79772	0.0722213	0.751274	72.5063	14.5488	0.00224579	0.801394	0.172038	4.75075	1.82655	0.207594	0.0438907	1.51427	0.460685	0.0671021	0.0650869	0.101597	0.0636129
80011	FAM192A	0.249638	0.139229	1.793	0.072973	0.752566	0	3.80725	0.283044	1.36889	-0.604545	1.83689	1.49498	0.310461	-0.14858	0.515053	0.361592	0.0514374	0.060404	0.0786205	0.0585011
10647	SCGB1D2	0.264907	0.147899	1.79113	0.0732729	0.753603	0	3.4076	0.332945	-0.483995	1.59345	1.16929	1.71149	-0.121493	0.412619	0.540682	0.407098	0.063012	0.0670538	0.213817	0.0565781
29781	NCAPH2	0.231889	0.129465	1.79112	0.0732733	0.753603	0	3.39002	0.335308	1.17863	2.28525	-0.280735	0.583731	0.286156	0.58191	-0.0827226	0.118624	0.0589456	0.0648405	0.0868272	0.0412973
54475	NLE1	-0.235388	0.131435	-1.7909	0.0733088	0.753603	0	0.242571	0.970441	-0.877687	-0.438242	-0.344247	-1.53916	-0.245538	-0.126146	-0.166244	-0.287045	0.0782631	0.0828555	0.233213	0.0347804
64062	RBM26	-0.322594	0.180055	-1.79164	0.0731907	0.753603	10.6684	4.4777	0.214288	-2.69188	-1.32936	-0.255547	-0.153755	-0.765116	-0.465395	-0.0612883	-0.0499227	0.0807872	0.122563	0.0575193	0.105423
10253	SPRY2	-0.431782	0.240998	-1.79164	0.0731901	0.753603	16.0714	4.76596	0.189759	-2.92936	-0.578966	0.284467	-1.21962	-1.11695	-0.236497	0.155048	-0.327795	0.145386	0.166857	0.297076	0.0722364
26130	GAPVD1	0.326337	0.182286	1.79025	0.0734138	0.754199	29.2073	5.6503	0.12992	-0.056416	2.66342	0.208851	2.09952	-0.0128283	0.666663	0.0655173	0.592318	0.0517049	0.0626518	0.09841	0.0795918
399726	CASC10	0.27073	0.151258	1.78985	0.0734781	0.754375	0	0.18818	0.979475	1.04462	0.687563	1.01673	0.891084	0.295023	0.202303	0.407719	0.243415	0.0797618	0.0865726	0.160809	0.0746205
64924	SLC30A5	0.322307	0.180524	1.78539	0.0741979	0.755069	44.6981	7.23303	0.0648299	-0.108876	0.573404	2.75099	2.45941	-0.0234322	0.124971	0.978552	0.454401	0.0463196	0.0475002	0.126529	0.0341362
5664	PSEN2	-0.244196	0.136531	-1.78857	0.0736835	0.755069	0	2.4272	0.488591	-1.30282	-0.946522	0.776129	-1.55903	-0.345869	-0.277722	0.287119	-0.344041	0.0704782	0.0860913	0.136854	0.0486981
1261	CNGA3	0.207097	0.115913	1.78666	0.0739919	0.755069	0	0.547565	0.908324	0.865373	1.40662	0.838572	0.555961	0.194646	0.313104	0.293629	0.10836	0.0505922	0.0495479	0.122607	0.0379883
27120	DKKL1	-0.264265	0.147902	-1.78676	0.0739763	0.755069	0	1.50101	0.682037	-1.58768	-1.2968	-0.684838	-0.148668	-0.414317	-0.416963	-0.349701	-0.0355163	0.0680988	0.103383	0.260746	0.0570716
10524	KAT5	0.257499	0.14423	1.78534	0.0742057	0.755069	0	2.93222	0.402195	-0.426627	1.67829	1.41131	1.06264	-0.127097	0.543133	0.506362	0.240714	0.0887518	0.104732	0.128729	0.0513134
222389	BEND7	0.3895	0.218083	1.78602	0.0740957	0.755069	37.8024	6.43111	0.0924192	0.402042	0.0423156	3.69421	1.16729	0.140424	0.0145197	0.943916	0.304301	0.121994	0.117738	0.0652867	0.0679599
220382	FAM181B	0.44666	0.250002	1.78663	0.0739975	0.755069	60.8427	10.2152	0.0168227	1.41604	0.593661	0.126217	4.84673	0.359019	0.145569	0.0520895	1.06898	0.0642809	0.0601254	0.170318	0.0486456
10270	AKAP8	0.363125	0.203157	1.78741	0.0738706	0.755069	46.0226	7.4105	0.0599032	0.920617	-0.140532	3.38158	1.4243	0.19176	-0.0364215	0.951271	0.420931	0.0433868	0.0671685	0.079135	0.0873415
10212	DDX39A	0.221938	0.124153	1.78762	0.0738373	0.755069	0	1.83414	0.607533	0.329159	0.924961	0.369415	1.98226	0.0738831	0.220281	0.106427	0.505973	0.0503823	0.0567164	0.0829991	0.0651527
2660	MSTN	0.349761	0.195698	1.78725	0.0738977	0.755069	26.4213	5.43636	0.142495	0.875705	3.30981	-0.197063	0.721546	0.242964	0.852003	-0.0944462	0.166212	0.0769783	0.0662639	0.229698	0.0530637
55752	2019-09-11	-0.279695	0.156638	-1.78561	0.0741629	0.755069	4.05014	4.16884	0.2438	-2.02298	0.450463	-1.92425	-0.745472	-0.584707	0.146271	-0.546099	-0.146628	0.0835393	0.105438	0.0805419	0.0386874
64598	MOSPD3	0.312972	0.175114	1.78725	0.0738972	0.755069	0	3.18675	0.363719	1.17548	1.74839	-0.656831	1.31713	0.411869	0.581775	-0.235694	0.422529	0.122769	0.110721	0.128763	0.102909
1421	CRYGD	-0.261689	0.146496	-1.78632	0.0740475	0.755069	0	0.22066	0.974187	-0.426091	-1.10123	-0.739184	-1.21282	-0.136926	-0.284664	-0.37908	-0.284725	0.103268	0.0668199	0.263001	0.0551136
254251	LCORL	0.204117	0.114096	1.78899	0.0736172	0.755069	0	2.68825	0.442228	-0.146314	1.04632	1.71263	1.35625	-0.0325169	0.205799	0.677749	0.274928	0.0493906	0.0386865	0.156607	0.0410919
2064	ERBB2	0.260843	0.146196	1.7842	0.0743917	0.756108	0.333281	4.01338	0.260023	2.03594	1.95417	-0.118287	0.297941	0.52678	0.524566	-0.0412977	0.0547782	0.0669466	0.0720568	0.121893	0.033803
164153	UBL4B	0.550375	0.308484	1.78413	0.0744022	0.756108	69.8935	13.2862	0.00405693	-0.0345875	2.33156	0.398835	5.58346	-0.00941927	0.646786	0.195196	1.20254	0.0741646	0.0769535	0.239527	0.0463868
79722	ANKRD55	0.353098	0.197989	1.78342	0.074518	0.756804	16.435	4.78669	0.1881	2.60849	-0.535303	0.601042	1.75024	0.762183	-0.185151	0.206972	0.490645	0.0853769	0.119633	0.11858	0.0785853
8703	B4GALT3	0.270399	0.151647	1.78308	0.0745732	0.756885	0	3.23568	0.356695	2.48105	0.712244	-0.0596109	0.293377	0.653905	0.200633	-0.0238267	0.0784402	0.069464	0.0793498	0.159763	0.0714866
146754	DNAH2	-0.416721	0.233807	-1.78233	0.0746955	0.757167	49.1537	7.86684	0.0488453	-0.986273	-0.187386	-0.614853	-4.23227	-0.265858	-0.0500283	-0.27823	-0.957104	0.0726618	0.0712786	0.20477	0.0511413
9731	CEP104	-0.290539	0.163003	-1.78241	0.0746828	0.757167	0	3.489	0.322192	0.112674	0.236352	-1.53619	-2.27866	0.0394401	0.0817345	-0.491219	-0.529008	0.122525	0.119589	0.102249	0.0538971
2274	FHL2	0.219962	0.123495	1.78115	0.0748879	0.757832	0	1.02109	0.796148	1.38657	0.229922	0.128723	1.48378	0.350403	0.0553674	0.0526954	0.287153	0.0638639	0.0579893	0.167585	0.0374534
56940	DUSP22	0.189059	0.106122	1.78152	0.074827	0.757832	0	3.04706	0.384426	1.54769	-0.476307	1.89981	0.239675	0.323506	-0.142713	0.360147	0.0448832	0.0436915	0.0897741	0.0359368	0.0350689
4991	OR1D2	0.377423	0.211909	1.78106	0.0749031	0.757832	31.1124	5.80656	0.12141	0.326478	1.9218	2.56631	0.28126	0.0902608	0.595996	1.0892	0.0691917	0.0764348	0.0961769	0.180135	0.0605191
79633	FAT4	-0.264446	0.148535	-1.78037	0.0750161	0.758497	0	1.74585	0.62679	-1.63343	0.130825	-0.237867	-1.47437	-0.555855	0.0446735	-0.101442	-0.310024	0.115803	0.116606	0.181872	0.0442161
162494	RHBDL3	0.277511	0.155917	1.77987	0.075098	0.758845	0	1.80142	0.614627	0.174798	1.64314	0.189633	1.48422	0.054731	0.495381	0.0619959	0.456372	0.098038	0.0908932	0.10688	0.0945452
1154	CISH	0.300019	0.168648	1.77897	0.0752454	0.759855	0	0.411821	0.93779	0.710842	0.583207	1.45471	0.784171	0.228636	0.263115	0.482146	0.231477	0.103453	0.203538	0.109851	0.087135
4359	MPZ	0.497559	0.279904	1.7776	0.0754692	0.761635	49.6051	7.93732	0.0473251	3.40922	1.25392	1.55423	-0.422356	1.01803	0.435957	0.752786	-0.121664	0.0891685	0.120878	0.234591	0.0829783
151449	GDF7	0.300653	0.169171	1.77721	0.0755333	0.761802	0	3.46296	0.325598	1.5676	1.94856	0.673699	0.134269	0.523159	0.683996	0.403073	0.02711	0.111378	0.123219	0.35796	0.0407667
140564	APOBEC3D	0.268176	0.151071	1.77516	0.075871	0.762384	0	2.64629	0.449432	1.44481	-0.391067	1.06782	1.55462	0.413523	-0.110044	0.591075	0.392146	0.0819176	0.0791833	0.306401	0.0636279
2335	FN1	0.241867	0.136245	1.77524	0.0758583	0.762384	13.0398	4.59981	0.203559	0.280868	2.81672	1.13742	0.293864	0.0552744	0.554866	0.406588	0.0556061	0.0387297	0.038805	0.127781	0.0358058
358	AQP1	0.422233	0.237938	1.77455	0.0759718	0.762384	27.2559	5.49872	0.138715	0.528269	0.554203	3.03404	0.812035	0.190358	0.221395	1.29343	0.205675	0.129847	0.159588	0.181737	0.0641522
139189	DGKK	-0.253814	0.142974	-1.77525	0.0758569	0.762384	0	0.438294	0.932223	-0.920118	-0.899116	0.257496	-1.36692	-0.257143	-0.268662	0.170615	-0.28729	0.0781024	0.0892856	0.43903	0.0441727
28965	SLC27A6	-0.371943	0.209571	-1.77478	0.0759337	0.762384	42.6193	6.97098	0.0728284	-0.37704	-0.0535964	-2.07537	-3.08884	-0.0930057	-0.0132234	-0.952672	-0.687416	0.0608477	0.0608714	0.210715	0.0495278
54663	WDR74	0.263484	0.148398	1.77553	0.0758108	0.762384	0	0.369777	0.946413	1.27645	1.09209	0.723464	0.420584	0.33123	0.336213	0.257062	0.120973	0.0673365	0.094779	0.126253	0.0827318
10384	BTN3A3	0.241097	0.135835	1.77493	0.0759101	0.762384	0	1.29548	0.730208	1.03155	-0.241091	1.3277	1.24933	0.251717	-0.0795894	0.407176	0.297844	0.059545	0.10898	0.0940509	0.0568357
8904	CPNE1	-0.30493	0.171701	-1.77594	0.075743	0.762384	0.110811	4.00444	0.260985	0.185395	-0.792372	-2.63677	-0.882435	0.071718	-0.340953	-0.766931	-0.166585	0.149645	0.185153	0.0845997	0.0356374
3739	KCNA4	0.25998	0.146588	1.77354	0.0761389	0.762835	0	3.6545	0.30127	2.3763	0.552228	-0.890982	1.14373	0.51365	0.122603	-0.482282	0.298245	0.046723	0.0492908	0.292998	0.0679979
255231	MCOLN2	-0.316856	0.17867	-1.77342	0.0761597	0.762835	0	2.56091	0.464384	-1.9379	-0.720684	0.409215	-1.12411	-0.767773	-0.286837	0.182017	-0.304958	0.156965	0.15841	0.197844	0.073598
476	ATP1A1	0.268956	0.151651	1.77352	0.0761431	0.762835	0	1.23116	0.745542	1.54834	0.0557009	0.0761749	1.40366	0.361917	0.0208811	0.0293521	0.417039	0.0546368	0.140534	0.148476	0.0882737
288	ANK3	0.472225	0.266345	1.77298	0.0762316	0.76289	70.1004	13.3781	0.00388635	3.2673	-0.815491	3.00705	1.58217	0.7969	-0.18522	1.17793	0.312286	0.0594881	0.0515869	0.153446	0.0389581
79822	ARHGAP28	-0.261448	0.147477	-1.77281	0.0762604	0.76289	0	3.66685	0.299758	-0.562736	-1.89437	-1.81793	-0.0094071	-0.155084	-0.490246	-0.671553	-0.0019828	0.0759496	0.0669731	0.136461	0.0444268
2215	FCGR3B	0.46296	0.261233	1.77221	0.0763594	0.763403	42.2089	6.92148	0.0744429	0.687467	1.17455	3.82688	-0.0927341	0.263801	0.548595	0.993714	-0.028684	0.147248	0.218153	0.0674268	0.0956758
145258	GSC	-0.293543	0.165733	-1.77118	0.0765311	0.763622	0	2.45287	0.483869	-1.62471	-1.41468	-0.703432	0.673884	-0.456843	-0.383517	-0.358205	0.26857	0.0790651	0.0734936	0.25931	0.158834
114815	SORCS1	0.446856	0.252304	1.7711	0.0765443	0.763622	72.1934	14.3851	0.0024252	-0.565624	1.36516	2.23584	4.7523	-0.114965	0.297532	0.854161	0.856047	0.0413117	0.0475008	0.145948	0.032448
79919	C2orf54	-0.248357	0.140257	-1.77073	0.0766063	0.763622	0	0.675365	0.878982	-0.727177	-1.19247	0.106252	-1.3597	-0.188065	-0.306886	0.0478918	-0.3414	0.0668863	0.066231	0.203167	0.0630439
119548	PNLIPRP3	-0.213955	0.120991	-1.76835	0.0770018	0.763725	0	1.86053	0.601852	-0.205017	-0.84257	-1.20229	-1.67038	-0.0430741	-0.17146	-0.516255	-0.416481	0.044142	0.0414109	0.184379	0.0621672
2570	GABRR2	0.229521	0.129835	1.76779	0.0770967	0.763725	0	1.11384	0.773733	0.208531	0.979553	1.23256	1.31022	0.0490833	0.246065	0.488359	0.300155	0.0554019	0.0631024	0.156986	0.0524808
9825	SPATA2	-0.252701	0.142999	-1.76716	0.0772022	0.763725	0	2.81695	0.420718	-0.376014	-2.11564	-1.14018	-0.149808	-0.115644	-0.752215	-0.281081	-0.0400867	0.094588	0.126415	0.0607738	0.0716027
11119	BTN3A1	0.232002	0.131152	1.76896	0.0769009	0.763725	0	0.18543	0.979906	0.915602	0.55878	1.0942	0.983266	0.231544	0.156559	0.334271	0.225304	0.0639517	0.0785008	0.0933266	0.0525042
84895	MIGA2	0.290319	0.164241	1.76765	0.0771201	0.763725	0	3.4352	0.329264	0.409172	1.9391	1.74587	-0.240678	0.121596	0.520046	0.663919	-0.0736737	0.088314	0.0719252	0.144613	0.0937025
25831	HECTD1	-0.256034	0.144848	-1.76761	0.0771269	0.763725	0	2.80436	0.422783	-1.43	-1.08228	-1.47683	0.729061	-0.37936	-0.339867	-0.391823	0.2416	0.070377	0.0986144	0.0703908	0.109816
55245	UQCC1	0.449477	0.254156	1.76851	0.0769759	0.763725	54.6795	8.82603	0.0316956	2.91579	0.138963	2.68859	0.162561	0.898518	0.0526914	0.877251	0.0329371	0.0949604	0.143775	0.106463	0.0410522
22893	BAHD1	0.377699	0.213679	1.7676	0.0771284	0.763725	34.2681	6.08532	0.107532	-0.389462	0.452303	2.96435	2.03114	-0.122874	0.154267	0.876789	0.520541	0.0995383	0.116328	0.0874842	0.0656796
5100	PCDH8	-0.39859	0.225205	-1.7699	0.0767432	0.763725	54.6918	8.82842	0.0316613	-1.63044	-4.26252	-0.200418	-0.163425	-0.36859	-0.909215	-0.107548	-0.0352598	0.0511068	0.0454989	0.287959	0.0465506
10418	SPON1	-0.434141	0.245567	-1.76791	0.0770754	0.763725	39.6323	6.62606	0.0848213	0.644914	-0.660189	-3.12523	-2.22851	0.248137	-0.258973	-0.997855	-0.557847	0.14804	0.153877	0.101946	0.0626616
55614	KIF16B	-0.269862	0.152562	-1.76887	0.0769154	0.763725	0	1.86	0.601965	-0.98289	-0.529156	-1.86517	-0.513771	-0.355111	-0.178742	-0.687947	-0.117287	0.130532	0.1141	0.136042	0.0521143
7873	MANF	0.267016	0.151075	1.76744	0.0771551	0.763725	6.35632	4.27151	0.233599	0.391563	-0.148637	2.42075	1.60616	0.0863295	-0.0393144	0.596489	0.46666	0.0486087	0.0699602	0.060716	0.0844159
57473	ZNF512B	-0.426081	0.241293	-1.76583	0.0774252	0.764985	42.5623	6.96407	0.0730517	0.09157	-0.658523	-1.02775	-3.98423	0.0338002	-0.220467	-0.337033	-0.994988	0.136249	0.112085	0.107539	0.062366
26872	STEAP1	-0.328707	0.186135	-1.76596	0.0774029	0.764985	43.59	7.09095	0.0690548	-0.976296	-3.53115	-0.524041	-0.396013	-0.21818	-0.792133	-0.266123	-0.0637409	0.0499422	0.0503228	0.25789	0.0259069
51475	CABP2	0.441962	0.250333	1.7655	0.0774802	0.765057	38.9729	6.55446	0.0875392	-0.260656	2.06588	0.102064	3.42743	-0.0847726	0.642389	0.0531192	0.908472	0.105773	0.0966908	0.270867	0.0702562
11232	POLG2	0.337214	0.191098	1.76461	0.077629	0.765491	0.661992	4.02666	0.2586	0.194572	0.0223065	2.86188	0.776882	0.0837514	0.00986648	0.810164	0.191819	0.185279	0.195642	0.0801388	0.0609638
10661	KLF1	0.312943	0.177355	1.7645	0.0776479	0.765491	0	1.52242	0.677107	0.962467	1.43391	1.28447	0.0597925	0.440754	0.632208	0.374561	0.0187966	0.209711	0.194391	0.0850349	0.0988243
6038	RNASE4	-0.26663	0.151142	-1.7641	0.0777153	0.765491	0	3.35694	0.339796	-2.44274	-0.796565	-0.38705	-0.183829	-0.679348	-0.240123	-0.171075	-0.0397336	0.0773444	0.0908712	0.195361	0.0467184
89890	KBTBD6	0.248685	0.140953	1.76431	0.0776799	0.765491	0	3.10853	0.375193	-0.448609	0.709269	1.86751	1.48623	-0.142895	0.222266	0.746381	0.287035	0.101461	0.0982029	0.159733	0.0372993
8517	IKBKG	-0.385798	0.21878	-1.7634	0.0778324	0.766173	58.953	9.74493	0.0208636	-1.85081	-4.46198	0.122879	-0.488703	-0.440157	-0.898307	0.0308455	-0.142271	0.0565578	0.0405317	0.0630127	0.0847503
83881	MIXL1	-0.212733	0.120811	-1.76088	0.0782582	0.767557	0	3.04347	0.384971	-0.240702	-0.48794	0.0687082	-2.4313	-0.0537822	-0.101741	0.0342133	-0.509967	0.0499251	0.0434772	0.247955	0.0439952
55809	TRERF1	0.294753	0.167285	1.76198	0.0780727	0.767557	34.1025	6.07003	0.108252	2.81443	-0.182149	1.80094	0.800817	0.587332	-0.0409291	0.744156	0.141639	0.0435499	0.0504907	0.170738	0.0312822
64098	PARVG	0.234725	0.133386	1.75974	0.0784523	0.767557	0	1.96696	0.579292	1.74608	1.28742	-0.128587	0.583821	0.47781	0.347113	-0.0383776	0.138114	0.0748826	0.0726943	0.0890758	0.0559645
8444	DYRK3	0.314658	0.178746	1.76036	0.078347	0.767557	0	3.70582	0.295033	1.92133	1.1686	-0.763835	1.49166	0.683816	0.438786	-0.29319	0.341443	0.12667	0.140985	0.147333	0.0523957
54997	TESC	0.301642	0.17136	1.76028	0.0783597	0.767557	0	1.60361	0.658572	0.359858	0.865433	1.93062	0.310527	0.129754	0.295127	0.640179	0.105463	0.130011	0.116293	0.109953	0.115346
90203	SNX21	-0.278592	0.158296	-1.75995	0.0784162	0.767557	22.5637	5.16553	0.16007	-1.25724	-0.0317288	0.0259083	-3.2451	-0.273701	-0.00686802	0.0112792	-0.62022	0.0473934	0.0468548	0.189529	0.0365287
57534	MIB1	-0.330732	0.187845	-1.76067	0.0782949	0.767557	0	3.58067	0.31045	-1.86251	-0.472542	0.686662	-1.90626	-0.696274	-0.194624	0.283704	-0.467307	0.139753	0.169633	0.170704	0.0600951
340542	BEX5	0.249141	0.14147	1.76109	0.0782225	0.767557	0	2.15196	0.541473	1.81947	0.803518	-0.736854	0.868527	0.457761	0.196757	-0.406034	0.23051	0.0632976	0.059961	0.303643	0.0704387
127795	C1orf87	0.262258	0.148897	1.76134	0.0781801	0.767557	0	1.88111	0.597446	0.862971	-0.0534885	-0.538443	1.98644	0.306293	-0.0208982	-0.315221	0.377438	0.125974	0.15265	0.342729	0.0361027
57565	KLHL14	-0.33543	0.190494	-1.76084	0.0782657	0.767557	30.4753	5.75335	0.124246	-0.959921	-3.0801	-0.925779	0.0777589	-0.266244	-0.831931	-0.309021	0.0180428	0.0769286	0.0729534	0.11142	0.0538406
1473	CST5	-0.24905	0.141662	-1.75806	0.0787379	0.769345	0	1.99852	0.572715	-0.660875	0.0276629	-0.878671	-1.96969	-0.167343	0.00762982	-0.441873	-0.475842	0.0641174	0.0760733	0.252896	0.0583617
7780	SLC30A2	-0.21267	0.120986	-1.75781	0.0787791	0.769345	0	2.08074	0.555819	-0.853945	-0.236486	0.34842	-2.06497	-0.191932	-0.0559447	0.158671	-0.406293	0.0505166	0.0559635	0.207391	0.0387125
59283	CACNG8	0.313835	0.17848	1.75838	0.0786834	0.769345	14.3965	4.67271	0.197393	0.746643	1.10226	-0.723055	3.18394	0.246621	0.348659	-0.25934	0.595126	0.109102	0.100055	0.128646	0.0349372
23179	RGL1	-0.289036	0.164502	-1.75704	0.0789114	0.769698	0	0.455016	0.928657	-0.928856	-1.19138	-0.231652	-1.09835	-0.337296	-0.444138	-0.0899894	-0.27855	0.131864	0.138974	0.150908	0.064317
7110	TMF1	-0.235139	0.133827	-1.75704	0.0789112	0.769698	0	2.18541	0.534829	-0.864758	-0.579358	0.34155	-2.01804	-0.263034	-0.201044	0.0950021	-0.413676	0.0925199	0.120417	0.0773675	0.0420207
57492	ARID1B	-0.210788	0.120027	-1.75618	0.0790585	0.769781	0	0.791147	0.851583	-0.323796	-1.3529	-0.252455	-1.36981	-0.0842874	-0.370172	-0.0789506	-0.245734	0.0677614	0.0748649	0.0978009	0.0321815
283383	ADGRD1	0.305495	0.174014	1.75558	0.0791602	0.769781	0	3.50006	0.320755	2.05166	1.66571	0.201907	-0.1201	0.622274	0.532265	0.107418	-0.0303213	0.0919924	0.102107	0.283041	0.0637393
80263	TRIM45	0.262695	0.149585	1.75616	0.0790615	0.769781	0	1.93582	0.585834	1.32256	0.316876	-0.261152	1.76129	0.423501	0.0903809	-0.105083	0.433986	0.102536	0.0813535	0.161912	0.0607143
170825	GSX2	0.235576	0.134147	1.7561	0.079071	0.769781	0	2.56877	0.462992	2.08082	-0.117735	0.973719	0.600716	0.491267	-0.0284658	0.373453	0.162152	0.0557399	0.0584572	0.147097	0.0728628
91851	CHRDL1	-0.332287	0.189249	-1.75581	0.0791201	0.769781	34.7367	6.12901	0.105499	-2.31625	0.396487	0.0292615	-3.27152	-0.573598	0.10756	0.0125223	-0.602588	0.061326	0.073594	0.183137	0.0339266
238	ALK	0.359483	0.204826	1.75506	0.0792489	0.770176	29.5267	5.67591	0.128488	2.95602	-0.0597602	1.52625	0.596039	0.752408	-0.0163476	0.781238	0.147094	0.0647875	0.0748316	0.262008	0.0609035
317719	KLHL10	-0.254819	0.145233	-1.75455	0.0793367	0.770562	3.73861	4.15535	0.24517	-2.41194	-1.40325	-0.734602	0.371982	-0.552373	-0.302555	-0.287367	0.0802443	0.0524483	0.0464881	0.153028	0.0465356
4832	NME3	0.248043	0.141398	1.75422	0.0793921	0.770633	0	0.814529	0.845989	1.43978	1.03887	-0.185082	0.839858	0.336277	0.277281	-0.073199	0.250343	0.054551	0.071239	0.156416	0.0888501
54059	YBEY	0.292879	0.167207	1.7516	0.0798428	0.774069	16.7046	4.80219	0.186868	0.669121	-0.402162	1.30122	2.91641	0.167526	-0.110176	0.487019	0.588284	0.0626835	0.0750539	0.140085	0.040689
54552	GNL3L	-0.342333	0.195425	-1.75174	0.0798184	0.774069	0	3.59698	0.3084	0.653542	-1.70767	-0.730477	-1.8918	0.25277	-0.609737	-0.2781	-0.593803	0.149591	0.12749	0.14494	0.0985222
114791	TUBGCP5	0.672632	0.384275	1.75039	0.0800511	0.775619	68.9993	12.9029	0.00485127	0.0100129	-0.0186121	5.12171	2.86653	0.00436329	-0.00815791	1.53221	0.95944	0.189893	0.192117	0.0894968	0.112027
25959	KANK2	0.329217	0.188166	1.74962	0.0801848	0.775677	0	1.55953	0.6686	1.24841	0.468139	0.0318614	1.68582	0.604257	0.221444	0.0110437	0.504127	0.234275	0.223758	0.120143	0.089425
83699	SH3BGRL2	-0.30184	0.172547	-1.74932	0.0802356	0.775677	0	1.9252	0.588076	-0.297381	-0.667084	-2.01849	-0.614471	-0.102673	-0.234994	-0.746709	-0.195952	0.119202	0.124094	0.136851	0.101695
90288	EFCAB12	-0.261442	0.149461	-1.74923	0.0802508	0.775677	0	1.51685	0.678387	-1.05777	-1.78775	-0.322596	-0.397065	-0.325336	-0.545636	-0.155567	-0.0907139	0.0945981	0.0931516	0.232549	0.0521945
4633	MYL2	-0.347281	0.19846	-1.74988	0.0801384	0.775677	37.4262	6.39245	0.0940019	-1.08604	0.465212	-1.21659	-3.48064	-0.289192	0.122323	-0.494768	-0.701768	0.0709053	0.0691379	0.165393	0.0406507
257160	RNF214	0.239463	0.136956	1.74846	0.0803846	0.776502	0	2.90893	0.405881	-0.438642	0.492332	1.30966	1.95347	-0.12196	0.146871	0.424267	0.441107	0.0773066	0.0889925	0.104945	0.0509889
51726	DNAJB11	0.239353	0.137021	1.74682	0.0806678	0.778767	0	3.28808	0.349305	0.983145	-0.0951413	2.10161	1.0806	0.227002	-0.0236445	0.795149	0.261365	0.0533117	0.061762	0.14315	0.0585013
5467	PPARD	-0.407493	0.23344	-1.7456	0.0808804	0.78035	61.9206	10.5044	0.0147314	0.553227	-1.18203	-3.53643	-2.20748	0.128522	-0.313477	-1.15247	-0.433457	0.0539693	0.0703326	0.106201	0.0385567
51385	ZNF589	0.374596	0.215063	1.7418	0.0815433	0.780749	30.2192	5.73223	0.12539	-0.0515798	2.57571	1.98885	0.34933	-0.0172888	0.8179	0.745264	0.083229	0.11235	0.100834	0.140416	0.0567648
116369	SLC26A8	0.344978	0.198223	1.74035	0.0817971	0.780749	4.69462	4.19703	0.240959	2.09966	-0.808059	0.830131	1.92354	0.746908	-0.322178	0.363813	0.425146	0.126542	0.158966	0.192071	0.0488511
4597	MVD	0.346469	0.198745	1.74329	0.0812837	0.780749	0	0.207904	0.976303	1.09602	0.598454	0.968714	0.865526	0.411384	0.253707	0.512253	0.287261	0.140882	0.179723	0.279627	0.110152
23224	SYNE2	-0.274276	0.157402	-1.74251	0.0814185	0.780749	14.7785	4.69365	0.195654	-2.64273	-0.937269	0.814832	-1.3731	-0.650122	-0.238432	0.313273	-0.250217	0.0605181	0.0647145	0.147812	0.0332071
88455	ANKRD13A	-0.310248	0.178153	-1.74147	0.0816011	0.780749	33.3926	6.00534	0.111351	-1.858	0.626498	-2.46498	-1.26391	-0.41218	0.145936	-0.719645	-0.339853	0.0492133	0.0542604	0.0852331	0.072302
91445	RNF185	-0.249144	0.143023	-1.74198	0.0815118	0.780749	0	1.15983	0.762655	-1.12801	0.0142497	-1.56606	-0.684959	-0.364757	0.00462655	-0.400605	-0.179544	0.104563	0.105415	0.0654362	0.0687089
51776	MAP3K20	-0.282218	0.161882	-1.74336	0.0812715	0.780749	6.88762	4.29588	0.231236	-0.526105	-1.9154	-2.0576	0.186105	-0.152489	-0.588578	-0.56058	0.0418848	0.0840108	0.0944259	0.0742256	0.050652
204219	CERS3	0.240765	0.138319	1.74065	0.0817453	0.780749	0	0.847424	0.838093	1.70464	0.610632	0.18067	0.752315	0.436851	0.153815	0.0959431	0.178641	0.0656754	0.0634508	0.282004	0.056385
7046	TGFBR1	0.325345	0.186579	1.74374	0.0812038	0.780749	9.38152	4.41411	0.220081	0.78898	-0.649314	1.22384	2.72137	0.246937	-0.231305	0.420573	0.654296	0.097958	0.1269	0.118095	0.0578058
23732	FRRS1L	-0.286717	0.1647	-1.74084	0.0817109	0.780749	10.1183	4.45029	0.216767	-1.57285	0.598576	-0.996136	-2.28267	-0.409822	0.152657	-0.335117	-0.559447	0.0678911	0.0650423	0.113177	0.0600667
6854	SYN2	0.26097	0.149656	1.74381	0.0811929	0.780749	0	0.980716	0.805918	0.316882	0.741965	1.6346	0.835906	0.102387	0.291077	0.515531	0.194242	0.104397	0.153903	0.0994689	0.0539972
22981	NINL	-0.261516	0.149927	-1.74429	0.0811081	0.780749	0	3.15444	0.368421	-0.959205	-0.824084	0.886385	-2.0172	-0.278566	-0.204332	0.420423	-0.526588	0.0843399	0.0614795	0.224971	0.068147
3037	HAS2	-0.190493	0.109365	-1.74181	0.0815426	0.780749	0	2.22006	0.528008	0.00709151	-0.659089	0.0428911	-2.19492	0.00160734	-0.138615	0.0164482	-0.372428	0.0513734	0.0442318	0.147063	0.0287904
1439	CSF2RB	0.345229	0.198368	1.74034	0.0817993	0.780749	0	0.509164	0.916874	0.944594	-0.0772725	1.01034	1.27237	0.412621	-0.0458314	0.355107	0.418702	0.190816	0.351784	0.123534	0.108288
2785	GNG3	-0.47581	0.273229	-1.74143	0.0816081	0.780749	48.9752	7.83933	0.0494517	-0.5407	0.479733	-3.13398	-2.54154	-0.181807	0.183634	-1.18555	-0.684839	0.11306	0.146524	0.143103	0.0726077
282763		0.407084	0.233419	1.74401	0.0811581	0.780749	58.3481	9.6034	0.0222564	3.57219	2.89864	-0.436928	0.358341	0.857623	0.705039	-0.171622	0.0757619	0.05764	0.0591614	0.154286	0.0447001
5502	PPP1R1A	-0.279291	0.160452	-1.74065	0.0817445	0.780749	0	3.94124	0.267879	-2.31918	0.475658	-0.483354	-1.56977	-0.611059	0.129414	-0.219809	-0.342385	0.0694221	0.0740235	0.206804	0.0475723
55559	HAUS7	0.382229	0.21924	1.74343	0.0812588	0.780749	50.6363	8.10313	0.0439278	2.85593	1.46105	-1.07498	2.62051	0.687885	0.374857	-0.338547	0.686396	0.0580145	0.065827	0.0991836	0.0686085
54838	WBP1L	0.271909	0.156557	1.73681	0.0824211	0.780788	0	2.34066	0.504777	0.615679	-0.0761394	2.10008	0.74964	0.153835	-0.0334758	0.690011	0.233065	0.0624312	0.193305	0.107954	0.0966602
25788	FSBP	0.397131	0.228399	1.73875	0.0820779	0.780788	52.1924	8.36687	0.039008	-0.53733	1.63603	1.2411	3.69657	-0.132229	0.371565	0.656026	0.802701	0.0605582	0.0515803	0.2794	0.0471529
25788	RAD54B	0.397131	0.228399	1.73875	0.0820779	0.780788	52.1924	8.36687	0.039008	-0.53733	1.63603	1.2411	3.69657	-0.132229	0.371565	0.656026	0.802701	0.0605582	0.0515803	0.2794	0.0471529
79898	ZNF613	-0.239988	0.138069	-1.73817	0.0821802	0.780788	0	3.53148	0.316702	-2.49771	-0.580848	-0.771265	-0.00890334	-0.528437	-0.163482	-0.392019	-0.00172605	0.0447614	0.0792165	0.258349	0.037584
705	BYSL	0.279748	0.161031	1.73723	0.0823458	0.780788	0	3.70152	0.295551	0.469906	0.454405	-0.160008	2.7668	0.147522	0.157621	-0.049454	0.616686	0.0985581	0.120321	0.095526	0.0496788
11078	TRIOBP	0.29249	0.168118	1.73979	0.0818957	0.780788	28.5806	5.60072	0.132737	-0.62252	1.47814	1.0064	2.92562	-0.15468	0.402863	0.269949	0.59517	0.0617398	0.0742823	0.0719488	0.0413854
7567	ZNF19	-0.513142	0.295466	-1.73672	0.0824371	0.780788	71.523	14.0464	0.00284262	-2.2999	-1.40863	0.819497	-5.28794	-0.554197	-0.335012	0.35038	-1.27555	0.0580644	0.056562	0.182804	0.0581862
128408	BHLHE23	-0.243067	0.139891	-1.73755	0.0822904	0.780788	0	2.74291	0.432984	-1.70349	-1.60094	0.539239	-0.0794754	-0.430058	-0.398501	0.271821	-0.020295	0.0637342	0.0619597	0.254099	0.0652099
339855	KY	0.394368	0.226928	1.73786	0.082236	0.780788	33.3328	5.99995	0.111613	1.89623	2.4284	-0.944443	1.5494	0.625751	0.814086	-0.35703	0.3967	0.108898	0.112383	0.142908	0.0655537
6907	TBL1X	0.242985	0.139744	1.73878	0.0820729	0.780788	0	1.57619	0.6648	1.72223	1.10313	0.630954	-0.135997	0.451795	0.273313	0.211147	-0.04018	0.0688178	0.0613858	0.111988	0.0872897
55295	KLHL26	0.288262	0.165805	1.73856	0.0821117	0.780788	0	2.0563	0.560804	0.116222	1.29647	1.66029	0.792459	0.0376305	0.407428	0.881905	0.218394	0.104834	0.0987596	0.282146	0.0759497
10945	KDELR1	-0.305106	0.17545	-1.73899	0.0820357	0.780788	36.8116	6.33028	0.0966016	-2.59563	0.632894	-2.35883	-0.744461	-0.622319	0.161193	-0.530329	-0.184868	0.0574831	0.0648678	0.0505473	0.0616652
131450	CD200R1	-0.346652	0.199407	-1.73841	0.0821386	0.780788	0	3.79443	0.284535	-1.01887	-0.710091	0.913676	-2.69277	-0.426212	-0.325115	0.427213	-0.568138	0.174989	0.209627	0.218628	0.0445153
672	BRCA1	0.266181	0.153257	1.73683	0.0824173	0.780788	0	1.15118	0.764735	-0.0368781	0.299639	1.20778	1.61798	-0.0137116	0.118866	0.513554	0.334076	0.138242	0.157368	0.180798	0.0426327
634	CEACAM1	0.336391	0.193836	1.73544	0.0826623	0.781064	0	2.49731	0.475778	-0.0488086	0.482006	2.02047	1.09182	-0.0178735	0.211284	0.837929	0.382691	0.1341	0.192144	0.171993	0.122856
11054	OGFR	0.284323	0.163864	1.73512	0.0827203	0.781064	0	2.37325	0.498633	0.0430799	1.96439	0.140632	1.22614	0.0138289	0.582801	0.0486195	0.438747	0.103044	0.0880206	0.119524	0.128042
10467	ZNHIT1	0.316252	0.18222	1.73555	0.0826428	0.781064	38.7131	6.52668	0.0886162	2.28313	1.7997	1.83354	-0.803514	0.524405	0.463114	0.517574	-0.180467	0.052756	0.0662182	0.0796827	0.0504437
84759	PCGF1	0.326175	0.187876	1.73612	0.0825427	0.781064	5.60339	4.23744	0.23694	0.12093	-0.454916	2.2889	1.95793	0.0437577	-0.165909	0.60029	0.582049	0.13093	0.133008	0.0687808	0.0883741
6334	SCN8A	0.444827	0.256399	1.7349	0.0827588	0.781064	66.1546	11.8185	0.00803164	-0.162603	3.79387	-0.0794528	3.79281	-0.0445881	0.898702	-0.0250607	0.833893	0.0751937	0.0561136	0.099487	0.048339
140458	ASB5	-0.361407	0.208229	-1.73562	0.082631	0.781064	46.752	7.51202	0.0572505	-0.718741	-2.92284	-2.19626	0.38643	-0.196854	-0.715227	-0.705497	0.0869937	0.0750142	0.0598794	0.103187	0.0506798
157313	CDCA2	0.322457	0.185918	1.73441	0.0828454	0.781396	0	1.01645	0.797271	0.122535	1.04055	0.290893	1.6859	0.0495021	0.418852	0.133105	0.489635	0.163202	0.162031	0.209373	0.0843494
1048	CEACAM5	-0.243549	0.14051	-1.73332	0.083038	0.781396	0	0.421974	0.935667	-0.408992	-1.01515	-0.974302	-1.13107	-0.116036	-0.260593	-0.458631	-0.262691	0.0804923	0.065897	0.221585	0.05394
10871	CD300C	0.384548	0.22185	1.73337	0.0830302	0.781396	12.8091	4.58763	0.204606	2.79425	0.0664131	1.05304	0.462718	0.925522	0.0240861	0.561748	0.12965	0.109709	0.13153	0.284575	0.0785078
2184	FAH	0.272686	0.157274	1.73383	0.0829491	0.781396	0	1.66318	0.64515	-0.144734	1.22171	0.420216	1.72604	-0.0464475	0.381447	0.168572	0.457304	0.102987	0.0974837	0.160926	0.070195
89874	SLC25A21	-0.288255	0.166275	-1.7336	0.0829885	0.781396	0	0.227069	0.973105	-0.78569	-1.18676	-0.191767	-1.08165	-0.292888	-0.416967	-0.121721	-0.252223	0.138964	0.123446	0.402891	0.0543745
196527	ANO6	-0.281364	0.162424	-1.73229	0.0832226	0.782214	0	2.20868	0.53024	-1.81055	-1.36051	-0.172478	0.225072	-0.474041	-0.45847	-0.0750424	0.074088	0.0685504	0.113558	0.189298	0.108356
9333	TGM5	-0.277183	0.16	-1.7324	0.0832032	0.782214	35.1425	6.16737	0.103745	-2.78824	0.538057	-0.36003	-2.43748	-0.516631	0.104994	-0.192601	-0.415371	0.034332	0.0380781	0.286179	0.0290394
10793	ZNF273	-0.200393	0.115702	-1.73197	0.083278	0.782276	0	2.4779	0.479298	-0.178281	-1.40744	0.623574	-1.75389	-0.0404438	-0.304784	0.250338	-0.33301	0.0514631	0.0468945	0.161167	0.0360506
10095	ARPC1B	0.28081	0.162167	1.73162	0.0833421	0.782419	0	0.245697	0.969895	0.944894	0.0813581	1.04283	1.12128	0.292141	0.0422357	0.29495	0.332773	0.0955916	0.269499	0.0799971	0.088079
51024	FIS1	0.268039	0.154841	1.73106	0.0834406	0.782426	0	2.97105	0.396111	1.99865	1.2348	0.598613	-0.299913	0.659105	0.409335	0.156783	-0.100895	0.108752	0.109892	0.0685968	0.113176
2023	ENO1	0.223672	0.129192	1.73132	0.0833951	0.782426	0	3.343	0.341702	2.44427	0.703896	0.550751	-0.517289	0.457279	0.167333	0.17809	-0.146164	0.0349998	0.0565126	0.104561	0.079839
5595	MAPK3	0.217831	0.125948	1.72953	0.0837148	0.783224	0	2.56262	0.46408	1.6932	1.48717	0.626742	-0.287226	0.384941	0.421304	0.173746	-0.0672902	0.0516859	0.0802551	0.0768513	0.0548852
23164	MPRIP	0.195579	0.113092	1.72937	0.083742	0.783224	0	0.988737	0.803977	0.88869	1.50258	0.87152	0.415232	0.19037	0.36608	0.280835	0.0759155	0.045888	0.0593577	0.103836	0.0334256
29098	RANGRF	-0.248048	0.143377	-1.73004	0.0836237	0.783224	0	1.08654	0.780325	-0.0236774	-0.269812	-1.42184	-1.40875	-0.00816632	-0.0943584	-0.413673	-0.313067	0.118956	0.122303	0.0846478	0.0493861
3225	HOXC9	0.367507	0.212528	1.72922	0.0837702	0.783224	42.4096	6.9456	0.0736521	2.09624	3.53649	-0.227528	-0.0360929	0.460312	0.841164	-0.106766	-0.00977867	0.0482194	0.0565739	0.220188	0.0734033
6147	RPL23A	0.232072	0.134162	1.72978	0.0836692	0.783224	0	0.557854	0.906009	0.670265	0.936059	1.42676	0.434629	0.175121	0.307946	0.351755	0.111422	0.0682626	0.108229	0.0607827	0.0657209
65009	NDRG4	0.299887	0.173577	1.72769	0.0840437	0.784865	24.7035	5.31233	0.150304	2.12499	0.355871	-1.05662	2.86225	0.52915	0.0872965	-0.566071	0.498166	0.0620074	0.0601737	0.287014	0.0302923
3581	IL9R	0.232908	0.134805	1.72775	0.0840336	0.784865	0	0.520435	0.914379	1.35987	0.469017	0.082816	1.1956	0.323031	0.122918	0.0397618	0.278654	0.056428	0.0686836	0.230518	0.0543195
79913	ACTR5	0.210644	0.122006	1.7265	0.0842579	0.785912	0	0.864068	0.834089	0.50894	1.04934	1.37732	0.766629	0.114178	0.215793	0.519221	0.188003	0.0503308	0.0422904	0.142113	0.0601396
4152	MBD1	0.352436	0.204163	1.72625	0.084303	0.785912	45.8258	7.38359	0.0606263	1.72077	-0.849886	3.13797	1.45723	0.43126	-0.24682	0.794773	0.363681	0.0628107	0.0843411	0.064149	0.0622848
125972	CALR3	0.256709	0.148696	1.72641	0.0842744	0.785912	0	2.18334	0.535238	1.13838	0.169022	-0.537151	1.88436	0.333574	0.0499664	-0.289803	0.435721	0.0858639	0.0873911	0.291081	0.0534675
4438	MSH4	-0.267451	0.154988	-1.72562	0.0844149	0.785971	0	3.1276	0.372367	-1.51745	-0.561776	0.823786	-1.73601	-0.474307	-0.159645	0.354803	-0.43853	0.0976988	0.0807581	0.185501	0.0638106
4237	MFAP2	0.201068	0.116518	1.72564	0.0844122	0.785971	0	0.104396	0.991305	1.20853	0.843292	0.584319	0.7544	0.235191	0.189938	0.277897	0.156895	0.0378727	0.0507305	0.226187	0.0432526
1562	CYP2C18	-0.227579	0.1319	-1.72539	0.0844566	0.785971	0	0.0892538	0.993095	-0.688017	-1.14415	-0.554554	-0.988057	-0.172137	-0.275666	-0.234926	-0.228456	0.0625967	0.0580496	0.179463	0.0534613
135295	SRSF12	-0.219993	0.127594	-1.72416	0.0846782	0.787119	0	2.43483	0.487184	-0.798469	-2.14864	-0.173141	-0.351252	-0.203661	-0.564182	-0.0684784	-0.0700316	0.0650577	0.0689463	0.156425	0.0397511
146225	CMTM2	0.288621	0.167396	1.72417	0.0846763	0.787119	0	1.079	0.782147	0.483691	1.62268	0.898596	0.614209	0.152173	0.647403	0.290643	0.196781	0.0989782	0.159178	0.104614	0.102645
11021	RAB35	-0.273107	0.158431	-1.72383	0.0847392	0.787229	5.17834	4.21845	0.238822	-1.3145	0.37758	-2.00269	-1.38952	-0.368602	0.0825957	-0.656945	-0.363753	0.0786313	0.0478516	0.107604	0.0685305
64755	C16orf58	-0.240486	0.139601	-1.72268	0.0849473	0.787661	0	2.70721	0.439004	0.353123	-1.35424	-1.69183	-0.924059	0.0931676	-0.322864	-0.575437	-0.282364	0.069611	0.0568394	0.115687	0.0933729
25926	NOL11	-0.327383	0.190027	-1.72283	0.08492	0.787661	30.3479	5.74283	0.124815	-1.39367	-0.806927	0.556911	-3.09837	-0.326893	-0.228028	0.188814	-0.797283	0.0550166	0.0798561	0.114947	0.0662151
5581	PRKCE	-0.31547	0.18323	-1.72171	0.0851213	0.787661	0	3.43459	0.329346	0.559965	-0.73763	-1.17765	-2.1777	0.193995	-0.284133	-0.441093	-0.6226	0.120022	0.148377	0.14029	0.0817376
79094	CHAC1	0.306539	0.178048	1.72167	0.0851299	0.787661	0	0.924602	0.819487	0.509799	0.986373	-0.166228	1.6212	0.187843	0.39745	-0.0874821	0.427083	0.135766	0.162361	0.276968	0.0693989
3097	HIVEP2	0.54318	0.315481	1.72175	0.0851141	0.787661	69.304	13.031	0.00457001	-0.867059	1.30419	3.78712	2.86834	-0.255549	0.415342	1.32024	0.740528	0.0868663	0.101421	0.121531	0.0666532
1807	DPYS	0.231598	0.134416	1.723	0.0848891	0.787661	0	0.611855	0.893713	1.53097	0.727893	-0.053993	0.839015	0.368322	0.181333	-0.0300053	0.193923	0.0578788	0.0620607	0.308831	0.053422
285600	KIAA0825	-0.372085	0.216033	-1.72235	0.085006	0.787661	44.4736	7.20378	0.0656785	-1.35193	0.602796	-1.20206	-3.84159	-0.381802	0.161072	-0.566907	-0.700201	0.0797564	0.0714001	0.222419	0.0332219
387082	SUMO4	-0.350848	0.203959	-1.72019	0.0853988	0.788918	19.3295	4.95844	0.174866	-2.44051	-0.61234	-1.48628	-0.0899672	-0.827184	-0.214817	-0.644409	-0.0185321	0.11488	0.12307	0.187983	0.0424309
10603	SH2B2	0.346113	0.201184	1.72038	0.0853635	0.788918	0	1.54623	0.671641	0.900125	1.70886	0.8699	0.137091	0.353293	0.695016	0.457107	0.0468891	0.154051	0.165416	0.276119	0.116984
57709	SLC7A14	0.333874	0.194168	1.71951	0.085521	0.788918	27.6196	5.52636	0.13707	-0.348036	0.796632	1.08702	3.16911	-0.104965	0.204507	0.404176	0.758058	0.0909572	0.0659022	0.138251	0.0572176
57292	KIR2DL5A	-0.303439	0.176574	-1.71848	0.0857091	0.788918	6.04436	4.25733	0.234985	-1.47764	0.994189	-1.56851	-2.09323	-0.460536	0.381802	-0.659981	-0.363046	0.0971388	0.147482	0.177047	0.0300809
54433	GAR1	0.325416	0.189306	1.719	0.0856148	0.788918	22.0596	5.13213	0.162374	1.14063	-0.104236	2.87476	0.618212	0.308543	-0.0384461	0.927489	0.139123	0.073172	0.136041	0.104091	0.0506434
6251	RSU1	-0.271854	0.158137	-1.71911	0.0855951	0.788918	0	3.89291	0.273263	-1.52688	0.286738	-2.24813	-0.466745	-0.402069	0.0917599	-0.696679	-0.109511	0.069341	0.102408	0.0960332	0.0550502
8907	AP1M1	0.227653	0.132409	1.71932	0.0855557	0.788918	0	0.810597	0.846931	1.39351	0.888391	0.057998	1.01597	0.338868	0.214488	0.0167842	0.305884	0.0591343	0.0582907	0.0837481	0.0906469
10004	NAALADL1	-0.277798	0.161567	-1.7194	0.0855418	0.788918	0	1.83145	0.608115	-0.905804	0.249834	-1.74124	-0.934328	-0.335819	0.0889468	-0.54933	-0.258181	0.137449	0.126753	0.0995289	0.0763571
10487	CAP1	0.264561	0.153933	1.71867	0.0856737	0.788918	23.568	5.23341	0.155482	0.562323	0.235797	3.33618	0.386316	0.113331	0.0559169	0.635294	0.133738	0.040619	0.0562356	0.0362619	0.119845
79827	CLMP	0.358027	0.208414	1.71787	0.0858207	0.789126	27.3698	5.50735	0.1382	1.67014	0.0112107	2.58471	0.580956	0.515273	0.00333505	1.11047	0.137535	0.0951856	0.0884994	0.184583	0.0560452
25976	TIPARP	-0.249796	0.145415	-1.71782	0.0858302	0.789126	0	2.22905	0.52625	-1.30409	-1.09679	0.55692	-1.40221	-0.389569	-0.305784	0.18194	-0.376774	0.0892392	0.0777282	0.106727	0.0722
57214	CEMIP	-0.236223	0.137575	-1.71705	0.0859707	0.789511	0	1.77072	0.621327	-0.241787	-0.987464	0.145707	-1.91421	-0.0656298	-0.254146	0.0585651	-0.451489	0.0736775	0.0662404	0.161555	0.055631
51614	ERGIC3	0.289413	0.168542	1.71716	0.0859507	0.789511	21.9899	5.12754	0.162693	1.46689	1.45789	-1.035	2.43917	0.331861	0.343097	-0.361076	0.601991	0.051182	0.0553842	0.121708	0.0609108
6340	SCNN1G	-0.228898	0.133352	-1.7165	0.0860709	0.789707	0	0.39755	0.940748	-0.452225	-1.21505	-0.563302	-1.16006	-0.111068	-0.338184	-0.269713	-0.245187	0.0603205	0.0774668	0.229257	0.0446714
9211	LGI1	0.520639	0.303334	1.71639	0.0860906	0.789707	80.0385	20.0386	0.000166646	0.7778	0.475801	6.38118	1.62263	0.185547	0.115578	1.34392	0.404639	0.0569077	0.0590062	0.0443549	0.0621864
51341	ZBTB7A	0.317299	0.184925	1.71583	0.0861931	0.789736	18.3127	4.89672	0.179518	1.11572	-0.308244	2.8756	0.668992	0.357809	-0.0969341	0.769995	0.175545	0.102846	0.0988927	0.0717001	0.0688546
330	BIRC3	-0.361052	0.210547	-1.71483	0.0863761	0.789736	31.801	5.86519	0.118357	0.167561	-3.12498	-0.41047	-1.44587	0.0556843	-0.965259	-0.135365	-0.353762	0.110438	0.09541	0.108755	0.0598638
80312	TET1	-0.469088	0.273486	-1.71522	0.0863057	0.789736	66.5062	11.9425	0.0075827	-2.41684	-4.37819	1.36129	-1.96552	-0.631291	-1.10631	0.662138	-0.37881	0.0682282	0.0638502	0.236591	0.0371439
7762	ZNF215	0.291134	0.169725	1.71533	0.0862855	0.789736	0	3.45435	0.326731	-0.672963	0.462679	1.72687	1.92609	-0.248292	0.184921	0.673287	0.404188	0.136126	0.159739	0.152013	0.0440368
890	CCNA2	0.33206	0.193555	1.71559	0.0862375	0.789736	0	1.61606	0.655753	0.612897	0.119194	1.87597	0.806334	0.266475	0.0540768	0.771393	0.247314	0.189033	0.205832	0.169082	0.0940734
3052	HCCS	0.351954	0.20525	1.71476	0.0863897	0.789736	26.5108	5.44298	0.142089	-0.944821	1.25204	1.61827	2.70406	-0.33267	0.426151	0.503028	0.634742	0.123974	0.115849	0.0966231	0.0551011
6398	SECTM1	-0.461578	0.269365	-1.71358	0.0866064	0.791027	45.474	7.33596	0.0619267	-1.03369	0.362555	-3.59941	-1.15052	-0.391758	0.139669	-1.16697	-0.344184	0.143635	0.148405	0.105113	0.0894942
1534	CYB561	0.259057	0.151643	1.70833	0.0875743	0.791027	13.2405	4.61045	0.202648	1.67456	0.0473572	-0.514083	2.755	0.38153	0.0114161	-0.19562	0.520009	0.0519105	0.0581119	0.144797	0.035627
226	ALDOA	0.268419	0.157168	1.70784	0.0876658	0.791027	20.9518	5.06021	0.167441	2.47428	2.03219	0.131375	-0.136632	0.490657	0.602039	0.0347859	-0.0308346	0.039324	0.0877652	0.0701102	0.0509301
226		0.268419	0.157168	1.70784	0.0876658	0.791027	20.9518	5.06021	0.167441	2.47428	2.03219	0.131375	-0.136632	0.490657	0.602039	0.0347859	-0.0308346	0.039324	0.0877652	0.0701102	0.0509301
5075	PAX1	-0.271059	0.158426	-1.71095	0.0870907	0.791027	7.68565	4.33302	0.227677	0.0154113	-2.80122	-0.146878	-1.07695	0.00439939	-0.70399	-0.0542174	-0.211688	0.0814908	0.0631597	0.136258	0.0386367
117	ADCYAP1R1	0.241536	0.141278	1.70965	0.0873307	0.791027	0	1.40728	0.703829	1.09339	-0.135383	0.771466	1.58783	0.286735	-0.03783	0.347612	0.376055	0.0687723	0.0780809	0.203028	0.0560914
6402	SELL	0.268214	0.156961	1.70879	0.0874894	0.791027	0	3.79669	0.284271	0.609367	-0.152693	2.83688	0.139983	0.16394	-0.0528729	0.591331	0.0476105	0.0723793	0.119902	0.043449	0.115679
5525	PPP2R5A	-0.313683	0.183468	-1.70974	0.0873133	0.791027	37.8557	6.43664	0.0921952	-2.23517	0.173847	-2.74979	-0.218865	-0.500418	0.0440464	-0.770927	-0.0543973	0.050124	0.0641926	0.0786011	0.0617735
56129	PCDHB7	0.215234	0.125648	1.71299	0.0867137	0.791027	0	1.06113	0.786464	0.374974	1.6821	0.388868	0.934982	0.088087	0.432298	0.137088	0.199185	0.0551849	0.0660485	0.124278	0.0453842
64754	SMYD3	-0.241691	0.141537	-1.70762	0.0877076	0.791027	0	3.21365	0.359843	-2.10283	-0.17932	0.364618	-1.35676	-0.601575	-0.0525843	0.123694	-0.292429	0.0818408	0.0859917	0.115085	0.0464551
150468	CKAP2L	0.365912	0.213996	1.7099	0.0872839	0.791027	0	0.574479	0.902249	0.713996	0.422867	1.32364	1.0284	0.361291	0.212856	0.743095	0.312763	0.256049	0.253374	0.315171	0.0924928
114960	TSGA13	0.268771	0.156877	1.71326	0.086665	0.791027	0	0.780408	0.854147	0.876579	1.39583	-0.167982	0.985249	0.243699	0.437917	-0.0858465	0.266124	0.0772903	0.0984281	0.261167	0.0729585
54621	VSIG10	0.240525	0.140525	1.71162	0.0869667	0.791027	0	1.20044	0.752899	0.200837	1.38968	-0.0903578	1.46641	0.0594716	0.406988	-0.0402079	0.308966	0.0876864	0.0857689	0.198013	0.0443925
79947	DHDDS	0.227098	0.132778	1.71036	0.0871988	0.791027	0	1.52404	0.676734	0.948354	1.10573	-0.391032	1.4746	0.242332	0.295272	-0.126831	0.348753	0.0652951	0.0713088	0.105202	0.0559354
440021	KRTAP5-2	-0.221402	0.12933	-1.71192	0.0869114	0.791027	0	2.23499	0.525089	-1.45506	0.108614	-1.12319	-1.33232	-0.393008	0.023272	-0.506148	-0.302704	0.0729522	0.0459091	0.20307	0.0516198
90324	CCDC97	-0.233537	0.136487	-1.71105	0.0870714	0.791027	0	0.714895	0.869695	-1.48279	-1.02877	-0.393223	-0.480561	-0.399639	-0.269996	-0.140256	-0.11476	0.0726399	0.0688778	0.127224	0.0570278
2998	GYS2	0.315842	0.184843	1.7087	0.087506	0.791027	16.9456	4.81612	0.185768	0.483815	0.351351	0.0396844	3.33532	0.130629	0.10509	0.0180285	0.722654	0.0728985	0.0894623	0.206387	0.0469446
3074	HEXB	-0.324014	0.1896	-1.70894	0.0874627	0.791027	36.1102	6.26078	0.0995894	-1.1745	-1.36472	0.834062	-3.1957	-0.265277	-0.328117	0.316532	-0.769092	0.0510147	0.0578058	0.144025	0.0579194
57662	CAMSAP3	0.214105	0.125344	1.70813	0.0876114	0.791027	0	0.956629	0.811745	1.26797	1.39732	0.519444	0.210431	0.293677	0.321961	0.242958	0.0452769	0.0536439	0.0530902	0.218768	0.0462952
3788	KCNS2	-0.699461	0.409624	-1.70757	0.0877163	0.791027	82.1702	22.4344	5.29712e-05	-0.718563	-0.95927	-6.19914	-1.17905	-0.219639	-0.290132	-2.0032	-0.318805	0.0934308	0.0914762	0.10442	0.0731115
727936	GXYLT2	0.376036	0.219934	1.70977	0.0873089	0.791027	42.0857	6.90676	0.0749299	3.45993	1.84338	-1.07383	0.898716	0.831707	0.45348	-0.594945	0.223396	0.0577837	0.0605179	0.306962	0.061788
55233	MOB1A	0.377174	0.220497	1.71056	0.0871618	0.791027	2.3229	4.09513	0.251374	0.297718	-0.487481	2.1256	1.91019	0.125111	-0.198411	0.718326	0.680262	0.176595	0.165659	0.114203	0.126823
59349	KLHL12	0.304114	0.177817	1.71026	0.087217	0.791027	31.7881	5.86408	0.118414	0.107437	0.834948	3.02577	0.853267	0.0231872	0.205611	0.895211	0.229191	0.0465784	0.0606423	0.0875345	0.072148
55351	STK32B	0.279978	0.163566	1.71172	0.0869484	0.791027	0	2.45448	0.483574	0.381363	1.37166	-0.639896	1.71701	0.13893	0.498971	-0.281346	0.415056	0.132713	0.13233	0.193314	0.0584345
84289	ING5	0.3173	0.185557	1.70999	0.0872684	0.791027	20.21	5.01316	0.170836	0.43237	-0.0227949	3.08303	0.888085	0.147872	-0.00845022	0.825247	0.185722	0.116966	0.137423	0.0716491	0.0437341
11341	SCRG1	0.249409	0.146088	1.70725	0.0877754	0.791115	0	1.40359	0.704694	0.634225	0.545541	-0.126847	1.89798	0.20666	0.157082	-0.048581	0.440567	0.106176	0.0829087	0.146682	0.0538813
10651	MTX2	0.330324	0.193728	1.70509	0.0881774	0.794291	45.5823	7.35055	0.0615255	1.57578	-0.294686	2.97548	1.14514	0.362339	-0.0701105	1.11391	0.220366	0.0528733	0.0566041	0.140147	0.0370315
50801	KCNK4	-0.200661	0.117722	-1.70453	0.0882828	0.794793	0	2.26943	0.518402	-0.99322	-1.14082	0.991391	-1.37987	-0.222463	-0.243454	0.440889	-0.274821	0.0501679	0.0455409	0.197773	0.0396665
135112	NCOA7	-0.25224	0.148006	-1.70426	0.0883332	0.794801	0	1.5981	0.65982	-1.12638	-1.77249	-0.0740198	-0.294376	-0.301435	-0.519752	-0.028096	-0.0812828	0.0716169	0.0859855	0.144076	0.0762416
220979	C10orf25	-0.28867	0.169443	-1.70364	0.0884483	0.795389	0	3.81758	0.281847	-1.43596	-2.39133	-0.102479	0.328995	-0.373449	-0.614217	-0.0585904	0.0891108	0.0676362	0.0659729	0.326875	0.073364
57110	HRASLS	-0.258592	0.152127	-1.69984	0.0891609	0.796876	0	1.84468	0.605261	-0.798349	-1.86384	0.211635	-0.760327	-0.247946	-0.546457	0.0776644	-0.204793	0.096456	0.0859598	0.134669	0.0725483
4902	NRTN	-0.510451	0.300242	-1.70013	0.0891065	0.796876	71.5812	14.0752	0.0028046	-0.72742	-2.56594	0.67007	-5.85528	-0.182369	-0.656088	0.343633	-1.17909	0.0628536	0.0653779	0.262997	0.0405505
79132	DHX58	-0.253419	0.149063	-1.70007	0.0891171	0.796876	0	3.18146	0.364485	-0.628878	-1.80555	-1.58081	0.0958217	-0.189716	-0.521866	-0.614121	0.0222176	0.0910075	0.0835413	0.150921	0.0537608
55793	MINDY1	-0.374595	0.220243	-1.70083	0.0889749	0.796876	43.2537	7.04892	0.0703548	-1.70505	0.840135	-1.25144	-3.23304	-0.49495	0.254584	-0.420305	-0.75072	0.0842657	0.0918256	0.1128	0.053918
30814	PLA2G2E	0.518541	0.304818	1.70115	0.0889146	0.796876	70.8378	13.7164	0.00331774	0.870914	2.56972	-0.806555	5.71739	0.231388	0.644054	-0.418924	1.21827	0.0705879	0.0628164	0.269775	0.0454041
4317	MMP8	0.375234	0.220612	1.70088	0.0889653	0.796876	0	2.46901	0.480918	-0.24089	-0.181678	1.57557	1.66989	-0.132476	-0.105751	0.822437	0.512448	0.30244	0.338819	0.272475	0.0941722
266812	NAP1L5	0.379504	0.223206	1.70024	0.0890857	0.796876	10.5001	4.46928	0.215047	-0.099264	0.164358	0.675958	3.33028	-0.0388226	0.0687778	0.33674	0.786001	0.152963	0.175112	0.24817	0.0557037
51642	MRPL48	0.328134	0.192803	1.70192	0.0887708	0.796876	23.5122	5.22959	0.155737	0.238448	-0.284332	2.82407	1.68059	0.0740387	-0.0885421	0.746227	0.48045	0.0964121	0.0969722	0.0698216	0.0817284
55756	INTS9	-0.204433	0.120208	-1.70066	0.0890069	0.796876	0	1.42965	0.6986	-0.713879	-1.607	-1.10754	-0.0564163	-0.141999	-0.373294	-0.359103	-0.0141549	0.039566	0.0539599	0.105128	0.0629509
4694	NDUFA1	0.241366	0.141823	1.70189	0.0887764	0.796876	0	0.828409	0.842661	0.800462	0.348577	0.548356	1.63153	0.21524	0.113652	0.151562	0.445864	0.0723045	0.106307	0.0763937	0.0746818
10201	NME6	0.344387	0.202558	1.7002	0.0890941	0.796876	42.9128	7.00682	0.0716807	2.00836	-0.0948311	0.0497344	3.29392	0.512663	-0.0259972	0.0145147	0.798462	0.0651601	0.0751538	0.0851725	0.05876
4360	MRC1	0.226225	0.133146	1.69907	0.0893061	0.797728	0	2.20428	0.531105	-0.047388	1.74407	-0.284774	1.40214	-0.0120984	0.429169	-0.148403	0.306929	0.0651811	0.0605523	0.271572	0.047917
222662	LHFPL5	0.279396	0.16451	1.69835	0.089441	0.798245	18.329	4.8977	0.179443	0.26793	0.483769	0.571605	3.0456	0.0570778	0.109531	0.27646	0.684116	0.0453828	0.0512621	0.233923	0.0504561
23035	PHLPP2	0.30862	0.18173	1.69823	0.0894636	0.798245	0	2.73628	0.434097	0.580972	0.542066	2.22823	0.154576	0.236791	0.229079	0.811093	0.0463686	0.166119	0.178593	0.132501	0.0899839
79814	AGMAT	-0.449174	0.264627	-1.69739	0.0896236	0.799227	47.8022	7.66316	0.0535111	0.589694	-0.603369	-3.44326	-2.1397	0.215489	-0.250973	-1.08416	-0.5443	0.133535	0.173017	0.0991388	0.06471
6191	RPS4X	0.349659	0.206116	1.69642	0.0898068	0.800277	45.5698	7.34886	0.0615717	2.03314	-0.986469	3.88106	0.928852	0.590174	-0.328455	0.639177	0.277813	0.0842608	0.110862	0.0271233	0.0894564
55103	RALGPS2	-0.263653	0.155434	-1.69624	0.0898413	0.800277	0	0.94783	0.813873	-0.139574	-0.748203	-0.324057	-1.77221	-0.0569675	-0.353852	-0.0978533	-0.396774	0.166588	0.223669	0.0911816	0.0501249
56666	PANX2	0.249076	0.146909	1.69545	0.0899904	0.800442	0	0.57609	0.901884	0.238898	0.491588	1.12891	1.37021	0.0749757	0.184382	0.282054	0.379243	0.0984954	0.14068	0.0624234	0.0766062
1293	COL6A3	-0.264179	0.155826	-1.69535	0.0900098	0.800442	0	1.0626	0.786108	-0.818447	0.134711	-0.827751	-1.60113	-0.285712	0.0464569	-0.397226	-0.356012	0.121864	0.11893	0.230291	0.0494396
54968	TMEM70	0.407268	0.240164	1.69579	0.0899256	0.800442	51.3872	8.22829	0.0415219	0.161726	-0.311695	2.38739	3.58647	0.0471106	-0.106476	0.716956	0.85393	0.0848555	0.116692	0.0901855	0.0566903
10994	ILVBL	0.338278	0.199578	1.69497	0.0900814	0.800635	45.3643	7.32122	0.0623344	2.69608	2.77046	-0.723183	0.59902	0.597878	0.728168	-0.262157	0.125173	0.0491768	0.0690809	0.13141	0.0436659
58473	PLEKHB1	0.268862	0.158726	1.69387	0.0902895	0.802039	0	2.85479	0.41456	0.476082	-0.0276611	0.0703555	2.34342	0.166352	-0.00954546	0.0253349	0.597309	0.122094	0.119084	0.129671	0.0649677
333929	SNAI3	0.279504	0.165201	1.6919	0.0906642	0.802986	0	1.68949	0.639274	0.546763	1.6664	-0.142445	1.20661	0.175295	0.610709	-0.0560313	0.334595	0.102787	0.134311	0.154727	0.0768966
55669	MFN1	0.264601	0.156452	1.69126	0.0907864	0.802986	6.20841	4.26477	0.234256	0.573176	1.39335	2.32446	0.175296	0.144942	0.353071	0.917394	0.0361206	0.0639459	0.0642102	0.155764	0.0424587
283461	C12orf40	-0.281968	0.166573	-1.69276	0.0905016	0.802986	42.0923	6.90755	0.0749037	-2.56037	-0.979996	-2.18841	0.475438	-0.488101	-0.186364	-0.765985	0.0932545	0.0363425	0.036164	0.122513	0.0384726
3270	HRC	-0.223872	0.132371	-1.69124	0.0907905	0.802986	0	0.570658	0.903115	-0.216048	-0.690477	-1.44879	-0.899191	-0.0622755	-0.187143	-0.33347	-0.253855	0.0830869	0.0734597	0.052979	0.0797019
221002	RASGEF1A	0.235379	0.139178	1.69121	0.0907971	0.802986	0	1.96702	0.57928	1.55294	1.43345	-0.513263	0.312046	0.364067	0.381033	-0.24601	0.0807733	0.0549609	0.0706581	0.229733	0.0670036
8674	VAMP4	0.331993	0.196224	1.69191	0.0906636	0.802986	20.9456	5.05981	0.16747	1.04283	-0.386548	2.76255	1.02923	0.316307	-0.155222	0.957794	0.211833	0.0919998	0.161251	0.120205	0.0423607
26515	TIMM10B	0.242092	0.143019	1.69273	0.0905074	0.802986	0	3.26657	0.352322	2.33663	-0.112816	0.484247	0.824699	0.655735	-0.0323133	0.131789	0.213816	0.0787548	0.0820391	0.0740666	0.0672186
402573	C7orf61	-0.375534	0.221933	-1.6921	0.0906265	0.802986	29.0856	5.6406	0.130467	-0.0455007	0.224994	-2.81118	-2.00559	-0.0173859	0.0764707	-0.890944	-0.540988	0.146002	0.115517	0.100444	0.0727599
57586	SYT13	-0.251768	0.148902	-1.69083	0.0908695	0.803182	0	1.85001	0.604114	-0.679111	-0.0771843	-1.62222	-1.26893	-0.194769	-0.0211484	-0.645622	-0.347793	0.0822542	0.075075	0.158394	0.0751224
79791	FBXO31	-0.229238	0.135623	-1.69026	0.0909781	0.803699	0	1.30451	0.728062	-0.74063	0.0315064	-1.10716	-1.54472	-0.174976	0.00918958	-0.361276	-0.39486	0.0558154	0.0850734	0.106477	0.0653411
4605	MYBL2	0.240929	0.142669	1.68873	0.0912718	0.805126	0	2.62481	0.453157	1.00493	0.705352	-0.718355	1.85827	0.258502	0.197437	-0.287828	0.479408	0.0661696	0.0783514	0.160541	0.066557
10678	B3GNT2	0.350516	0.207573	1.68864	0.0912889	0.805126	0	1.29115	0.731235	0.418073	-0.224717	0.829167	1.79718	0.177325	-0.1334	0.389699	0.560369	0.179903	0.352403	0.220889	0.0972224
2790	GNG10	0.332725	0.197039	1.68863	0.0912905	0.805126	0	2.91827	0.404399	0.319937	-0.0310711	2.26189	0.741786	0.118673	-0.0146136	0.891706	0.27025	0.137587	0.221208	0.155417	0.132731
64064	OXCT2	-0.2688	0.15925	-1.68791	0.091428	0.805895	0	1.00314	0.800493	-0.111916	-1.08469	-1.26731	-1.02812	-0.0355875	-0.390946	-0.503806	-0.261009	0.101115	0.129905	0.158037	0.0644498
115811	IQCD	0.437213	0.25975	1.68321	0.0923351	0.806058	55.6879	9.02688	0.0289356	3.90211	-0.0185834	1.42628	0.639822	0.963585	-0.00467782	0.780031	0.169046	0.0609793	0.0633636	0.299098	0.0698056
11176	BAZ2A	0.309179	0.183352	1.68626	0.0917458	0.806058	7.75069	4.33608	0.227386	0.567699	0.135578	0.232648	2.96914	0.173876	0.04635	0.0768289	0.756255	0.0938082	0.116876	0.109056	0.0648747
126402	CCDC105	-0.225666	0.133958	-1.6846	0.092065	0.806058	0	1.14234	0.766863	-0.300547	-1.78806	-0.604628	-0.571983	-0.0776276	-0.409703	-0.305327	-0.135692	0.0667125	0.0525016	0.255008	0.0562788
1774	DNASE1L1	0.297537	0.176401	1.68671	0.0916592	0.806058	41.6026	6.84962	0.0768486	0.71448	-0.426815	1.41208	3.54936	0.154984	-0.109249	0.410638	0.662882	0.0470536	0.0655166	0.0845672	0.0348797
2920	CXCL2	-0.270607	0.160723	-1.68368	0.0922426	0.806058	0	0.650634	0.884749	-1.4195	-1.0081	-0.397435	-0.544262	-0.444676	-0.347921	-0.150768	-0.149933	0.0981331	0.119111	0.143908	0.0758886
3145	HMBS	0.301804	0.179242	1.68378	0.0922249	0.806058	0	2.71152	0.438273	1.99476	0.372734	1.17602	-0.213543	0.790016	0.173625	0.333316	-0.0769897	0.156852	0.216983	0.0803312	0.129986
5111	PCNA	0.233252	0.138353	1.68593	0.0918102	0.806058	0	2.62005	0.453985	0.360806	-0.259003	0.652848	2.19976	0.0928484	-0.0801824	0.268813	0.482218	0.0662218	0.0958402	0.169542	0.048055
196472	FAM71C	-0.223062	0.132527	-1.68315	0.0923465	0.806058	0	1.47398	0.688288	-0.532234	-1.41233	-1.39129	-0.305491	-0.135866	-0.34923	-0.539691	-0.0708522	0.0651656	0.0611435	0.150471	0.0537912
51268	PIPOX	-0.254661	0.151106	-1.68531	0.0919286	0.806058	0	2.01758	0.568767	-1.88115	-0.544326	0.491738	-0.883755	-0.530047	-0.162237	0.260816	-0.218302	0.0793928	0.0888341	0.281321	0.0610174
5347	PLK1	0.29898	0.177281	1.68647	0.0917047	0.806058	0	3.53943	0.315684	1.8016	-0.375576	1.71634	0.727537	0.561215	-0.133778	0.790904	0.18233	0.0970378	0.126874	0.212344	0.0628067
115106	HAUS1	0.290515	0.17224	1.68669	0.0916638	0.806058	0	3.56648	0.312241	0.081136	-0.117949	2.37411	1.197	0.0273203	-0.0428718	0.74646	0.319986	0.113381	0.132115	0.0988575	0.0714624
3746	KCNC1	0.242322	0.143764	1.68555	0.0918832	0.806058	1.49557	4.06073	0.254981	-0.553623	2.1292	0.967934	1.50458	-0.127602	0.521319	0.395058	0.283171	0.0531236	0.0599478	0.166583	0.0354216
131096	KCNH8	0.261833	0.155564	1.68312	0.0923524	0.806058	0	2.92136	0.40391	1.74454	0.0177258	-0.670652	1.50357	0.518408	0.00526242	-0.405445	0.376893	0.0883044	0.0881371	0.365485	0.0628327
29881	NPC1L1	0.457285	0.271664	1.68327	0.0923223	0.806058	62.5481	10.6804	0.0135861	2.32167	4.14173	-0.653068	0.796216	0.590322	1.13784	-0.237319	0.218485	0.0646511	0.0754737	0.132053	0.0752975
23380	SRGAP2	0.223545	0.132637	1.68539	0.0919132	0.806058	0	3.30691	0.346682	-0.5987	1.62949	0.622669	1.78155	-0.144052	0.410675	0.272333	0.348795	0.0578925	0.0635178	0.191288	0.0383303
7292	TNFSF4	-0.345846	0.205476	-1.68315	0.0923466	0.806058	16.992	4.81881	0.185555	-1.65505	-1.48058	-1.78801	0.424861	-0.510606	-0.501628	-0.817721	0.104123	0.0951815	0.114789	0.209157	0.0600616
10525	HYOU1	0.244898	0.145341	1.68498	0.0919918	0.806058	0	0.5485	0.908114	0.349398	0.48616	0.60467	1.63206	0.107234	0.154888	0.243887	0.358506	0.094195	0.101503	0.162683	0.0482528
27152	INTU	0.362396	0.214792	1.6872	0.0915658	0.806058	36.2655	6.27604	0.098926	1.70571	-0.494483	0.507342	3.33255	0.487131	-0.131415	0.276506	0.712093	0.0815609	0.0706293	0.297034	0.0456583
3683	ITGAL	0.240122	0.142703	1.68267	0.0924385	0.80637	0	2.83743	0.417376	1.08787	1.75514	1.01498	-0.612095	0.271142	0.485744	0.333695	-0.187114	0.0621214	0.0765938	0.108089	0.0934489
11074	TRIM31	0.237395	0.141139	1.682	0.0925697	0.806877	0	2.43762	0.486671	0.777082	1.43154	1.61661	-0.0113681	0.230807	0.428097	0.572562	-0.00256058	0.0882191	0.0894291	0.125439	0.0507339
6389	SDHA	0.356249	0.211819	1.68185	0.0925974	0.806877	65.2605	11.5143	0.00924661	4.74927	0.311527	1.51155	0.285569	0.828588	0.0633098	0.465163	0.0591359	0.0304385	0.0413	0.0947026	0.0428827
9342	SNAP29	-0.232857	0.138525	-1.68098	0.092767	0.807038	0	2.68295	0.443133	-1.14757	-1.81213	0.457902	-0.8356	-0.299155	-0.502953	0.127826	-0.245513	0.0679568	0.077033	0.077928	0.086328
1836	SLC26A2	0.276661	0.164582	1.68099	0.0927655	0.807038	0	2.96622	0.396862	0.275165	1.4677	-0.651637	1.77128	0.0944213	0.478162	-0.273064	0.48554	0.117748	0.106139	0.175597	0.0751404
6489	ST8SIA1	0.216178	0.128591	1.68113	0.0927383	0.807038	0	1.99315	0.57383	0.0696205	1.93709	-0.141386	1.02087	0.0174562	0.430971	-0.0597913	0.235605	0.0628676	0.049499	0.17884	0.0532631
2776	GNAQ	0.327762	0.195251	1.67867	0.0932155	0.80704	0	1.9747	0.577675	0.399926	-0.535637	1.61999	1.31203	0.168172	-0.290495	0.518285	0.482116	0.176827	0.294128	0.102356	0.135025
90952	ESAM	-0.359549	0.214007	-1.68008	0.0929422	0.80704	27.5425	5.52047	0.137419	-0.463937	-1.0012	-2.97689	-0.152031	-0.145711	-0.340084	-1.02018	-0.0414447	0.0986428	0.115379	0.117443	0.0743148
1263	PLK3	0.381472	0.22715	1.67938	0.0930776	0.80704	27.3632	5.50685	0.138229	-0.746007	1.64985	2.40346	1.27658	-0.258166	0.642584	0.814839	0.356639	0.11976	0.151695	0.11494	0.0780476
4131	MAP1B	-0.233556	0.139133	-1.67865	0.0932208	0.80704	0	2.27992	0.516379	-0.880305	0.11826	-0.580686	-1.9929	-0.239888	0.0299631	-0.20871	-0.516758	0.074259	0.064195	0.129182	0.0672361
79027	ZNF655	0.446392	0.265727	1.67989	0.0929786	0.80704	57.1982	9.34541	0.0250341	0.033153	0.204892	3.85279	1.96091	0.0116644	0.0676711	1.31332	0.404672	0.123789	0.109082	0.116196	0.0425882
84549	MAK16	-0.29429	0.175301	-1.67877	0.0931975	0.80704	0	3.731	0.292014	-1.96315	-0.938923	0.904988	-1.45804	-0.516509	-0.359775	0.340584	-0.401134	0.0692226	0.146825	0.141632	0.0756906
72	ACTG2	-0.295362	0.175814	-1.67997	0.0929626	0.80704	0	3.89807	0.272683	-1.14651	-0.561682	-2.3257	-0.221941	-0.354136	-0.188194	-0.977853	-0.0505109	0.0954082	0.112261	0.176782	0.0517959
84707	BEX2	0.265834	0.158357	1.6787	0.0932108	0.80704	0	3.33749	0.342459	1.02112	-0.626595	1.20511	1.91478	0.292768	-0.188532	0.492772	0.482781	0.0822035	0.0905308	0.167201	0.0635717
9180	OSMR	0.300985	0.179138	1.68018	0.0929219	0.80704	14.4517	4.67572	0.197142	0.0518891	0.0547775	2.34703	1.81118	0.0141247	0.0152767	0.749241	0.50946	0.0740986	0.0777777	0.101908	0.0791218
133015	PACRGL	0.224621	0.133862	1.678	0.0933477	0.807703	0	1.32304	0.723669	0.760145	0.359888	1.61551	0.906372	0.206671	0.086865	0.585663	0.216638	0.0739205	0.0582579	0.131425	0.057129
387263	C6orf120	0.285528	0.170209	1.67752	0.0934414	0.808076	0	1.96225	0.580279	-0.195584	0.162468	1.69178	1.35998	-0.0775056	0.0707313	0.614533	0.347748	0.157037	0.189535	0.131948	0.0653833
10279	PRSS16	0.298061	0.177791	1.67647	0.0936459	0.808115	22.8769	5.18651	0.158638	-0.212612	2.3323	-0.0968468	2.3472	-0.0563846	0.637581	-0.0335374	0.513112	0.0703308	0.074731	0.119919	0.0477886
10885	WDR3	0.240478	0.143431	1.67661	0.0936194	0.808115	0	0.181328	0.980546	0.545421	0.597429	0.828312	1.28524	0.163009	0.183855	0.300784	0.292776	0.0893227	0.0947062	0.131862	0.0518926
28957	MRPS28	0.401481	0.239387	1.67712	0.0935187	0.808115	54.5749	8.8057	0.0319889	0.561484	-0.502188	2.81161	2.83958	0.135129	-0.150177	0.873644	0.776944	0.0579193	0.0894283	0.0965513	0.0748638
79774	GRTP1	-0.384637	0.229434	-1.67646	0.0936477	0.808115	35.3293	6.18518	0.10294	0.687535	-1.97337	-0.48948	-3.25497	0.23805	-0.663665	-0.201682	-0.717134	0.11988	0.113105	0.169772	0.0485407
26271	FBXO5	0.238262	0.142159	1.67602	0.0937344	0.808419	0	2.22601	0.526843	1.9451	-0.0126994	0.778007	0.803865	0.613674	-0.0040351	0.369808	0.160437	0.0995389	0.100958	0.225936	0.0398332
4337	MOCS1	0.3556	0.212201	1.67577	0.0937839	0.808419	44.9958	7.27218	0.0637104	3.55818	0.951287	0.60835	0.10586	0.894161	0.244914	0.259452	0.0224713	0.0631504	0.0662836	0.181889	0.0450597
90139	TSPAN18	-0.329603	0.196814	-1.67469	0.0939956	0.808505	17.8362	4.86832	0.181697	0.604816	-2.19578	-1.96811	-0.685813	0.221096	-0.721651	-0.601859	-0.173222	0.133634	0.108013	0.0935173	0.0637957
220004	PPP1R32	0.388186	0.231796	1.67469	0.0939957	0.808505	43.4048	7.06774	0.0697698	0.515716	1.50406	-0.377894	3.62396	0.158658	0.452134	-0.134064	0.925135	0.0946463	0.0903657	0.125859	0.0651693
8564	KMO	-0.273477	0.163227	-1.67544	0.0938477	0.808505	0	1.64168	0.649978	0.144575	-0.865916	-0.362433	-1.88327	0.052368	-0.353858	-0.128352	-0.471559	0.131203	0.166996	0.125414	0.0626969
50508	NOX3	-0.233564	0.139447	-1.67494	0.0939467	0.808505	0	1.25112	0.740771	-0.843706	-0.0956137	-0.0387349	-1.82594	-0.24089	-0.026573	-0.0197636	-0.38605	0.0815181	0.0772395	0.260331	0.0447008
5355	PLP2	0.253883	0.151733	1.67322	0.0942834	0.810544	0	1.45673	0.692293	0.135955	1.47611	1.38328	0.38151	0.0429716	0.488502	0.398474	0.109031	0.0999015	0.109521	0.0829808	0.0816751
6283	S100A12	0.332029	0.198574	1.67207	0.0945113	0.810744	0	3.6078	0.307048	-0.648532	0.470083	2.23661	1.3406	-0.249703	0.217895	0.612373	0.513594	0.148246	0.214855	0.0749637	0.146771
8482	SEMA7A	0.278724	0.166631	1.67271	0.0943849	0.810744	0	2.77669	0.427351	0.678764	1.18147	-0.847467	1.73201	0.251465	0.435633	-0.368895	0.4317	0.137252	0.135956	0.189478	0.0621247
53833	IL20RB	0.251577	0.150458	1.67207	0.0945101	0.810744	0	3.2348	0.356821	-0.2646	1.29154	1.77534	1.13363	-0.0667108	0.357988	0.788956	0.299056	0.0635644	0.0768284	0.197488	0.0695917
26339	OR5K1	-0.244107	0.145988	-1.6721	0.0945044	0.810744	0	2.19108	0.533708	-0.309368	-1.87163	0.456796	-1.0861	-0.0869524	-0.514512	0.225677	-0.263944	0.0789971	0.0755701	0.244077	0.0590587
80183	RUBCNL	0.341835	0.204469	1.67182	0.0945598	0.810744	32.3417	5.91206	0.115968	1.09368	0.32829	3.32954	-0.0474993	0.297217	0.105885	0.872696	-0.0149725	0.0738526	0.104029	0.0687002	0.0993603
50614	GALNT9	-0.336752	0.201775	-1.66895	0.095128	0.811495	37.8698	6.43809	0.0921363	-3.28331	0.488316	-0.0298793	-2.20623	-0.766783	0.141909	-0.0161348	-0.404872	0.0545406	0.0844536	0.291599	0.0336769
825	CAPN3	0.295674	0.177123	1.66932	0.0950545	0.811495	0	1.86418	0.601069	-0.289496	0.796937	1.7401	0.950755	-0.109228	0.294166	0.570111	0.332118	0.142359	0.13625	0.107342	0.122025
9793	CKAP5	0.22295	0.133427	1.67095	0.0947318	0.811495	0	1.94463	0.583979	1.71616	0.186371	1.27621	0.357841	0.446909	0.0656418	0.452376	0.0709957	0.0678143	0.124052	0.125648	0.0393626
4794	NFKBIE	-0.444738	0.266527	-1.66864	0.0951888	0.811495	59.6977	9.925	0.0192145	-2.16246	0.00879958	-3.73813	-0.137278	-0.619828	0.00296745	-1.13453	-0.0346759	0.0821569	0.113721	0.0921138	0.0638043
92241	RCSD1	0.21216	0.127151	1.66856	0.0952047	0.811495	0	1.3381	0.720106	1.62747	-0.0669161	0.88115	0.832244	0.350337	-0.0163182	0.280071	0.226021	0.0463388	0.059468	0.101027	0.0737561
81610	FAM83D	0.414099	0.247922	1.67028	0.0948638	0.811495	10.9878	4.49377	0.212847	0.727017	0.213683	2.7027	0.612847	0.330227	0.107113	1.25326	0.164754	0.206318	0.25127	0.215024	0.0722714
873	CBR1	0.330728	0.198007	1.67029	0.0948625	0.811495	39.4058	6.60129	0.0857524	0.558809	0.066917	0.83344	3.58576	0.13301	0.0174623	0.313093	0.808715	0.0566557	0.0680974	0.141123	0.0508661
51692	CPSF3	0.219912	0.131796	1.66858	0.0952003	0.811495	0	2.41852	0.490196	-0.280238	1.50795	1.57164	0.616584	-0.067785	0.381095	0.427371	0.183442	0.0585077	0.063869	0.073944	0.0885146
1755	DMBT1	-0.268874	0.161086	-1.66914	0.0950899	0.811495	9.56854	4.42324	0.21924	-0.328617	-0.912974	0.575932	-2.95556	-0.0813788	-0.217079	0.297165	-0.599854	0.0613257	0.0565353	0.266227	0.0411917
23335	WDR7	-0.367765	0.220226	-1.66994	0.0949304	0.811495	60.8227	10.21	0.0168629	-3.13583	-3.34718	-0.508517	0.641636	-0.668551	-0.719457	-0.164781	0.143787	0.0454532	0.046201	0.105004	0.0502186
54868	TMEM104	-0.248758	0.149173	-1.66758	0.0953989	0.812285	0	0.517742	0.914977	-0.467953	-0.335502	-1.38828	-1.01966	-0.167789	-0.115718	-0.418545	-0.242004	0.128565	0.118964	0.0908933	0.056329
26995	TRUB2	-0.411237	0.246606	-1.66759	0.0953972	0.812285	49.0505	7.85092	0.0491954	-1.05482	-3.42948	-1.02499	0.196193	-0.33155	-1.07003	-0.362326	0.0491267	0.0987958	0.09735	0.124956	0.0627
2250	FGF5	-0.313147	0.187946	-1.66616	0.0956824	0.814266	42.4485	6.9503	0.0734988	0.536861	-1.91093	-2.40199	-1.32465	0.106775	-0.433944	-0.903392	-0.306005	0.0395561	0.0515677	0.141452	0.0533651
79156	PLEKHF1	-0.374863	0.225044	-1.66573	0.0957669	0.814553	31.9452	5.87762	0.117718	0.720843	-0.706887	-2.57357	-2.11334	0.246568	-0.253832	-0.801863	-0.593725	0.117001	0.128941	0.0970799	0.0789281
144715	RAD9B	0.240325	0.144327	1.66514	0.0958849	0.814969	0	1.70076	0.636764	-0.0883334	1.05738	1.32093	1.266	-0.0232874	0.305081	0.551314	0.317839	0.0695009	0.0832473	0.174196	0.0630303
56341	PRMT8	-0.443353	0.266343	-1.66459	0.0959941	0.814969	64.14	11.1545	0.0109192	0.808172	-3.17308	-2.70082	-1.15631	0.204577	-0.814447	-1.00282	-0.285525	0.0640774	0.0658818	0.137865	0.0609734
84899	TMTC4	-0.21137	0.127009	-1.66421	0.0960703	0.814969	0	0.459205	0.927758	-0.44545	-1.27086	-0.212104	-1.1706	-0.123556	-0.342358	-0.0802143	-0.220351	0.0769361	0.0725718	0.143023	0.0354333
84940	CORO6	-0.608719	0.365663	-1.6647	0.095973	0.814969	75.5714	16.3742	0.000950247	-1.59212	0.830181	-4.59364	-2.16076	-0.464389	0.245905	-1.5578	-0.710042	0.0850772	0.0877382	0.115004	0.107983
285596	FAM153A	-0.222775	0.133861	-1.66423	0.0960656	0.814969	0	2.70828	0.438822	-0.366759	0.325676	-0.146286	-2.28385	-0.102376	0.0959969	-0.0713171	-0.437453	0.077917	0.0868846	0.237673	0.0366883
23166	STAB1	0.29081	0.175126	1.66058	0.0967978	0.81532	0	1.23709	0.744123	0.356811	1.55684	0.136278	1.19373	0.126865	0.555372	0.0517291	0.379444	0.126417	0.127257	0.144084	0.101038
56903	PAPOLB	-0.319712	0.192531	-1.66057	0.0967988	0.81532	36.7609	6.3252	0.0968171	-0.835947	-1.86189	-2.57631	0.346792	-0.209318	-0.435027	-0.979874	0.0803333	0.0626984	0.0545916	0.144659	0.0536602
23272	FAM208A	0.465039	0.279798	1.66205	0.0965019	0.81532	54.2269	8.73876	0.0329736	0.867892	-0.58012	3.51557	1.91611	0.274365	-0.216652	1.27873	0.518408	0.0999369	0.139473	0.132302	0.0731984
1833	EPYC	0.375674	0.226155	1.66114	0.0966863	0.81532	43.0981	7.02964	0.070959	1.08729	0.231182	0.19613	3.60322	0.3075	0.0569317	0.0834905	0.963158	0.079984	0.0606456	0.181211	0.0714519
6621	SNAPC4	-0.214709	0.129441	-1.65873	0.0971692	0.81532	0	1.94594	0.583703	-0.505144	-0.413833	-1.99427	-0.542047	-0.129911	-0.0951274	-0.560323	-0.150502	0.0661395	0.0528398	0.0789426	0.0770922
84417	C2orf40	-0.624147	0.376433	-1.65806	0.097306	0.81532	77.4532	17.7408	0.000497433	-2.0027	0.912823	-4.74155	-1.90067	-0.594538	0.296959	-1.80481	-0.481587	0.088131	0.105833	0.144885	0.0642001
113828	FAM83F	0.282511	0.170233	1.65955	0.0970047	0.81532	0	0.994743	0.802524	-0.025736	0.58152	0.723393	1.69904	-0.009011	0.256524	0.388242	0.403396	0.122593	0.194593	0.288042	0.0563712
84288	EFCAB2	-0.233901	0.141046	-1.65833	0.0972508	0.81532	0	3.38658	0.335772	-1.99472	-1.59919	0.471724	0.19088	-0.443078	-0.371163	0.206879	0.0508159	0.0493398	0.0538676	0.192334	0.0708723
2091	FBL	0.234053	0.141016	1.65976	0.0969626	0.81532	0	3.2519	0.354393	2.29289	0.446093	-0.273513	0.864673	0.588342	0.113319	-0.081635	0.242733	0.0658402	0.0645287	0.0890832	0.0788048
3696	ITGB8	-0.229696	0.13837	-1.66001	0.0969122	0.81532	0	1.39384	0.706978	-0.719199	0.115938	-0.837868	-1.70786	-0.195694	0.0357972	-0.236274	-0.431601	0.0740382	0.0953329	0.079521	0.063865
10180	RBM6	0.243044	0.146267	1.66164	0.0965846	0.81532	0	0.771821	0.856195	0.670377	1.54911	0.20616	0.800773	0.195067	0.411087	0.0632875	0.251723	0.0846702	0.0704215	0.094238	0.0988164
171392	ZNF675	-0.318069	0.191848	-1.65792	0.0973335	0.81532	15.9184	4.75728	0.190458	-0.176119	-1.58124	0.453284	-2.74096	-0.0576668	-0.465146	0.165202	-0.687184	0.107211	0.0865335	0.132827	0.0628554
4070	TACSTD2	0.336481	0.202384	1.66259	0.0963947	0.81532	0	2.26635	0.518999	-0.126776	-0.047612	2.00832	0.989383	-0.0598551	-0.0237019	0.680387	0.369221	0.222909	0.247817	0.114775	0.139266
55140	ELP3	0.374213	0.225247	1.66134	0.096645	0.81532	63.0211	10.817	0.0127579	0.083908	2.71385	3.60588	-0.129498	0.0194587	0.609197	0.914474	-0.0311065	0.0537799	0.0503899	0.0643164	0.0577001
79966	SCD5	-0.201655	0.121521	-1.65943	0.0970301	0.81532	0	1.09961	0.777168	-1.48523	-0.0768547	-0.204569	-1.26477	-0.344793	-0.0188205	-0.0784739	-0.249532	0.0538926	0.0599682	0.147154	0.0389252
8328	GFI1B	0.284881	0.171815	1.65807	0.0973033	0.81532	0	0.105718	0.991143	0.587446	0.808091	0.837477	1.07491	0.201906	0.27445	0.366582	0.316686	0.11813	0.115347	0.1916	0.0867978
8808	IL1RL2	0.252098	0.151942	1.65917	0.0970806	0.81532	0	0.216551	0.974874	0.862083	1.00036	0.0950142	1.10294	0.25845	0.289338	0.0451733	0.277371	0.0898784	0.0836563	0.226041	0.0632435
7161	TP73	0.315282	0.189986	1.6595	0.0970151	0.81532	25.729	5.38568	0.145638	1.82969	-0.59129	0.464158	2.83151	0.558776	-0.160651	0.187271	0.574466	0.0932651	0.0738183	0.162783	0.0411617
221223	CES5A	-0.244154	0.147019	-1.66069	0.0967751	0.81532	0	1.17463	0.759095	-1.39853	-0.164039	-1.10717	-0.850831	-0.371678	-0.046196	-0.602385	-0.21192	0.0706302	0.0793075	0.296018	0.0620378
337882	KRTAP19-1	0.302374	0.182016	1.66125	0.0966642	0.81532	25.0467	5.33666	0.148741	1.73361	-0.537432	0.433536	2.81654	0.418148	-0.133498	0.21375	0.609802	0.0581778	0.0617028	0.243087	0.0468754
7343	UBTF	0.203978	0.123005	1.6583	0.0972577	0.81532	0	3.35627	0.339887	0.604528	1.41316	-0.965431	1.83328	0.126185	0.307554	-0.358156	0.374543	0.0435691	0.0473653	0.137626	0.0417394
2938	GSTA1	-0.227383	0.137082	-1.65874	0.0971682	0.81532	0	1.13239	0.769262	-0.343943	0.026668	-1.00192	-1.66161	-0.101544	0.0087262	-0.387709	-0.327604	0.0871631	0.107071	0.149742	0.0388723
5105	PCK1	0.298979	0.179901	1.66191	0.0965307	0.81532	24.405	5.29136	0.151664	0.296439	0.823002	2.69707	1.13615	0.0803797	0.187365	1.34433	0.23218	0.0735228	0.0518291	0.248444	0.0417618
9274	BCL7C	0.251699	0.151322	1.66333	0.0962462	0.81532	0	1.83545	0.607252	0.00330444	1.83593	0.4703	1.00513	0.00104611	0.619061	0.228716	0.221083	0.100221	0.113698	0.236508	0.0483801
686	BTD	-0.335878	0.202637	-1.65753	0.0974117	0.815549	40.1002	6.67782	0.0829074	-2.28953	-1.6975	-1.94832	0.972987	-0.557691	-0.485329	-0.568106	0.261473	0.0593327	0.0817436	0.0850229	0.0722168
605	BCL7A	-0.202617	0.122384	-1.65559	0.0978054	0.81586	0	2.01754	0.568775	-2.07521	-0.491946	-0.146156	-0.434327	-0.475543	-0.132713	-0.0569241	-0.0829909	0.0525116	0.0727765	0.15169	0.0365113
84570	COL25A1	0.185795	0.112144	1.65675	0.0975707	0.81586	0	0.680709	0.877732	1.3439	0.109961	0.403443	1.20191	0.260784	0.0256838	0.150323	0.22951	0.0376553	0.0545556	0.138831	0.0364638
55616	ASAP3	0.303013	0.182942	1.65633	0.0976543	0.81586	0	1.36458	0.713858	1.19291	1.59081	0.181912	0.348169	0.443586	0.586436	0.0867477	0.105499	0.138273	0.135896	0.227402	0.0918155
80212	CCDC92	-0.320879	0.193812	-1.65562	0.0977998	0.81586	29.3092	5.65844	0.129463	0.558478	-1.87752	-2.6731	-0.540041	0.174188	-0.520507	-0.724418	-0.146678	0.0972805	0.0768568	0.0734425	0.0737696
9502	XAGE2	-0.35542	0.214656	-1.65577	0.0977694	0.81586	45.2657	7.30803	0.0627016	0.326653	-3.24896	-1.07155	-1.30275	0.0861185	-0.912235	-0.52544	-0.223135	0.0695056	0.0788361	0.240449	0.0293366
390637	GDPGP1	0.27679	0.16709	1.65653	0.0976139	0.81586	0	3.67159	0.29918	1.56342	-0.30483	-0.399089	2.25086	0.451339	-0.0925098	-0.215092	0.500115	0.0833398	0.0921002	0.290475	0.0493677
220082	SPERT	0.468538	0.282873	1.65636	0.0976492	0.81586	63.243	10.8823	0.0123798	2.81881	1.53632	2.7262	-0.985192	0.804388	0.46107	0.954472	-0.257411	0.0814328	0.0900686	0.122578	0.0682672
152065	C3orf22	0.275222	0.166661	1.65138	0.0986606	0.816597	0	0.293615	0.961225	0.541581	1.27386	0.413542	0.966246	0.187854	0.429044	0.229751	0.244361	0.120314	0.113438	0.308656	0.0639573
673	BRAF	0.245943	0.148887	1.65187	0.0985602	0.816597	0	1.90148	0.593103	1.20856	0.976796	1.48173	0.141072	0.386504	0.346575	0.559223	0.0312571	0.102276	0.125888	0.142439	0.0490925
2824	GPM6B	0.19319	0.117173	1.64876	0.0991971	0.816597	0	0.578922	0.90124	0.496026	0.486688	0.803781	1.47253	0.115919	0.1066	0.314853	0.282536	0.0546135	0.0479743	0.153441	0.0368144
779	CACNA1S	0.265021	0.160469	1.65154	0.0986282	0.816597	0	2.68128	0.443418	1.12884	0.0437226	-0.420304	1.98897	0.358215	0.0134075	-0.204621	0.530625	0.100698	0.0940342	0.237014	0.0711732
10904	BLCAP	0.27638	0.167153	1.65346	0.098238	0.816597	16.3428	4.78142	0.188521	1.71994	0.853157	2.29502	-0.740814	0.396103	0.213385	0.650503	-0.226136	0.0530383	0.0625562	0.0803389	0.0931795
221458	KIF6	-0.352878	0.213505	-1.65278	0.098375	0.816597	35.6396	6.215	0.101606	-3.15471	0.369284	-0.879067	-1.10376	-0.931756	0.114612	-0.287075	-0.286706	0.0872341	0.0963246	0.106647	0.0674718
221496	LEMD2	-0.234184	0.141901	-1.65033	0.0988748	0.816597	0	2.46339	0.481944	-0.129917	-1.10106	0.521358	-1.91988	-0.0364104	-0.251645	0.285771	-0.504918	0.0785456	0.052234	0.300446	0.0691657
326624	RAB37	-0.202475	0.122795	-1.64889	0.0991699	0.816597	0	0.592542	0.898138	-1.29708	-1.12425	-0.249446	-0.550275	-0.299793	-0.282933	-0.0770262	-0.119165	0.0534208	0.0633345	0.095351	0.0468966
154865	IQUB	-0.247605	0.149681	-1.65422	0.0980826	0.816597	0	2.67675	0.444194	-1.17052	-1.88766	0.527622	-0.448815	-0.329516	-0.559123	0.226564	-0.11514	0.0792501	0.0877337	0.18439	0.0658138
29114	TAGLN3	0.228485	0.138225	1.65299	0.0983336	0.816597	0	3.67434	0.298845	1.48174	1.70966	-1.23377	0.920435	0.365913	0.374327	-0.616708	0.178382	0.0609832	0.0479384	0.249856	0.0375592
3656	IRAK2	-0.277465	0.167877	-1.65279	0.098374	0.816597	4.93649	4.20771	0.239891	-0.0450314	-2.71789	-0.276932	-0.830907	-0.0116403	-0.731019	-0.0959886	-0.227831	0.0668185	0.0723425	0.120142	0.0751835
79738	BBS10	0.309376	0.187654	1.64865	0.0992194	0.816597	0	2.96611	0.39688	0.1139	-0.459094	0.79014	2.19911	0.0467023	-0.208487	0.340276	0.629374	0.168125	0.206232	0.185462	0.0819073
54537	FAM35A	0.343364	0.20783	1.65214	0.0985061	0.816597	32.8898	5.96035	0.113555	0.347665	-0.682963	2.61648	2.57395	0.114684	-0.255554	0.858701	0.483582	0.108814	0.140014	0.107708	0.0352973
84343	HPS3	0.355145	0.215103	1.65105	0.0987291	0.816597	5.20182	4.21949	0.238718	0.287635	-0.568959	2.01766	2.02843	0.0975451	-0.26704	0.795688	0.58838	0.115008	0.220288	0.155521	0.084139
4008	LMO7	0.236255	0.14316	1.65029	0.0988833	0.816597	0	1.17154	0.759838	1.78912	0.655565	0.410707	0.309225	0.448759	0.208663	0.152251	0.0779146	0.0629142	0.101311	0.137422	0.0634877
402682	UFSP1	-0.275909	0.167005	-1.6521	0.0985148	0.816597	0	2.59738	0.457949	-0.793687	0.642583	-1.63723	-1.26627	-0.278992	0.256011	-0.587865	-0.342053	0.123562	0.15873	0.128925	0.0729678
529	ATP6V1E1	0.201567	0.122205	1.64942	0.0990623	0.816597	0	3.69437	0.296414	0.0200811	0.366443	2.02165	1.59391	0.00383192	0.073367	0.567557	0.36808	0.0364131	0.0400856	0.0788144	0.0533279
5518	PPP2R1A	0.249336	0.150966	1.65161	0.0986148	0.816597	0	1.72484	0.631426	0.404018	1.88462	-0.211389	0.832422	0.117959	0.471172	-0.0819036	0.270269	0.0852432	0.0625045	0.150121	0.105416
343099	CCDC18	0.357865	0.216779	1.65083	0.0987726	0.816597	32.3707	5.9146	0.11584	0.43031	0.671177	3.07995	0.507256	0.147312	0.198456	1.13073	0.125718	0.117196	0.0874291	0.134783	0.0614245
4041	LRP5	0.236492	0.143402	1.64915	0.0991169	0.816597	0	2.19017	0.533886	1.69151	0.253003	1.35205	0.395735	0.478678	0.0791065	0.6337	0.0856258	0.0800825	0.097763	0.219675	0.0468165
5156	PDGFRA	-0.271099	0.163866	-1.65439	0.0980478	0.816597	0	3.39012	0.335296	-0.554828	-0.635903	0.788709	-2.41645	-0.188276	-0.238359	0.325799	-0.50511	0.115153	0.140502	0.170634	0.0436934
25945	NECTIN3	-0.348396	0.211063	-1.65067	0.0988057	0.816597	37.7151	6.4221	0.0927859	-2.47141	-0.719364	-2.04275	0.427465	-0.686458	-0.23311	-0.702778	0.096745	0.0771502	0.105009	0.11836	0.051222
291	SLC25A4	-0.409368	0.248091	-1.65007	0.0989289	0.816597	49.2066	7.87503	0.0486662	0.143974	-0.298422	-1.48284	-4.25381	0.0422261	-0.105199	-0.64033	-0.85284	0.0860194	0.124269	0.186474	0.0401956
338785	KRT79	-0.277311	0.168189	-1.6488	0.0991879	0.816597	0	3.35141	0.340551	-1.52574	-1.995	0.293285	-0.110705	-0.474945	-0.624686	0.141312	-0.0281136	0.0969	0.0980481	0.232154	0.0644907
51085	MLXIPL	-0.2861	0.173122	-1.65259	0.0984141	0.816597	19.0741	4.9428	0.176034	0.510873	-0.872529	-1.36007	-2.7975	0.125652	-0.245489	-0.658574	-0.51477	0.0604945	0.0791596	0.234471	0.03386
27133	KCNH5	0.497645	0.301979	1.64795	0.0993636	0.816697	76.3225	16.8937	0.00074323	3.39368	-0.307091	4.01095	0.216398	0.77416	-0.0761203	1.36659	0.0483762	0.0520378	0.0614422	0.116086	0.0499754
23098	SARM1	-0.261727	0.158831	-1.64783	0.0993867	0.816697	0	0.670853	0.880037	-1.18467	-0.8041	-1.06402	-0.451713	-0.401504	-0.31911	-0.37547	-0.111024	0.114864	0.157493	0.124523	0.0604097
26073	POLDIP2	-0.237787	0.144268	-1.64823	0.0993063	0.816697	0	3.27639	0.350942	-0.215787	-1.32665	-2.09749	0.200942	-0.058201	-0.380438	-0.565567	0.0561071	0.0727462	0.0822349	0.0727055	0.0779644
4781	NFIB	-0.274893	0.166851	-1.64754	0.0994476	0.816697	0	0.129256	0.988109	-0.883063	-0.583125	-0.559813	-1.18761	-0.40113	-0.243907	-0.199324	-0.284132	0.206342	0.174954	0.126775	0.0572392
149041	RC3H1	0.347557	0.21098	1.64735	0.0994865	0.816697	37.9501	6.44642	0.0917996	1.16296	3.16535	0.776313	-0.280582	0.325536	0.915032	0.246373	-0.0752021	0.0783554	0.0835659	0.100719	0.0718355
146434	ZNF597	-0.32775	0.199053	-1.64654	0.0996524	0.81764	24.1561	5.27399	0.152799	-1.03416	-2.88014	0.320777	-0.771856	-0.323784	-0.908893	0.130099	-0.162307	0.0980258	0.0995862	0.16449	0.0442181
55578	SUPT20H	0.212191	0.128993	1.64498	0.0999733	0.81919	0	3.34786	0.341037	0.588301	-0.42049	1.43698	1.94408	0.13913	-0.0989307	0.433986	0.428803	0.0559296	0.0553544	0.0912122	0.0486502
55572	FOXRED1	-0.460355	0.279827	-1.64514	0.099941	0.81919	63.7551	11.036	0.0115327	-0.930685	0.60682	-3.99511	-2.02053	-0.260513	0.187412	-1.18603	-0.571179	0.0783527	0.0953841	0.0881328	0.0799121
9410	SNRNP40	0.239093	0.145356	1.64488	0.0999947	0.81919	0	1.09061	0.779342	1.77585	0.767558	0.20576	0.105461	0.385015	0.251085	0.105974	0.0293168	0.0470051	0.107009	0.265263	0.0772771
5362	PLXNA2	0.221542	0.134717	1.6445	0.100073	0.819248	0	1.21875	0.748512	-0.167171	0.977743	0.506094	1.63801	-0.0479108	0.293921	0.198213	0.325393	0.0821386	0.0903673	0.153391	0.0394624
79180	EFHD2	-0.199648	0.121449	-1.64388	0.1002	0.819248	0	1.91638	0.589942	-0.991176	0.341674	-1.23894	-1.40875	-0.19521	0.0894588	-0.335999	-0.378774	0.0387886	0.0685524	0.0735484	0.072292
51213	LUZP4	0.237271	0.144334	1.64391	0.100195	0.819248	0	3.96457	0.265315	0.0771756	0.420754	0.866219	2.57417	0.0161344	0.093217	0.432573	0.572641	0.0437066	0.0490832	0.24938	0.049487
9476	NAPSA	0.324142	0.197214	1.64361	0.100258	0.819248	0	2.02643	0.56694	1.78043	0.989791	-0.365163	0.667012	0.710653	0.393419	-0.195095	0.215258	0.159318	0.157988	0.285442	0.104148
5213	PFKM	0.256617	0.156111	1.64381	0.100215	0.819248	0	3.54784	0.31461	-0.166166	2.39238	0.769794	0.616965	-0.0547161	0.727568	0.239588	0.141328	0.108429	0.0924884	0.0968683	0.052473
442117	GALNTL6	0.389629	0.237109	1.64325	0.100331	0.819432	57.2343	9.35329	0.0249444	-1.04737	3.09646	1.89618	1.91247	-0.267942	0.706722	0.696646	0.475513	0.0654463	0.0520913	0.134979	0.0618208
6936	GCFC2	0.390294	0.237626	1.64247	0.100492	0.819906	41.942	6.88966	0.0754989	-0.554868	1.21853	2.86794	1.48778	-0.170302	0.386208	1.15481	0.373324	0.094202	0.100455	0.162135	0.0629642
200931	SLC51A	0.34081	0.207474	1.64267	0.100452	0.819906	0	2.35412	0.502232	-0.341544	0.245713	0.181016	2.20061	-0.163646	0.134295	0.110295	0.614269	0.22957	0.29872	0.371262	0.0779168
11185	INMT	-0.257921	0.157106	-1.6417	0.100652	0.820177	0	3.92509	0.269667	-2.24681	-0.422604	-1.48665	0.141297	-0.53318	-0.0875253	-0.704165	0.041967	0.0563137	0.0428943	0.224352	0.0882162
8547	FCN3	0.254031	0.154748	1.64157	0.100679	0.820177	4.87973	4.2052	0.240142	-0.459548	1.80353	0.22667	2.20101	-0.103254	0.424977	0.114786	0.480351	0.0504836	0.0555243	0.256443	0.0476291
6774	STAT3	0.260265	0.158524	1.6418	0.100631	0.820177	16.1376	4.76972	0.189457	0.565983	1.73338	2.24614	-0.26143	0.123174	0.49548	0.640471	-0.0599602	0.0473624	0.0817084	0.0813069	0.0526037
10713	USP39	0.239086	0.145788	1.63996	0.101014	0.821092	11.4107	4.51522	0.210937	1.92889	0.215957	2.16765	-0.157165	0.387071	0.0437384	0.667935	-0.0419704	0.0402686	0.0410197	0.0949485	0.0713138
10800	CYSLTR1	-0.269476	0.164335	-1.6398	0.101047	0.821092	0	3.85442	0.27762	-0.918827	-1.90097	-1.55542	0.595891	-0.258121	-0.541275	-0.495574	0.166283	0.0789187	0.081075	0.101513	0.0778686
115509	ZNF689	-0.295334	0.180074	-1.64007	0.10099	0.821092	34.2318	6.08197	0.10769	0.488644	-2.84839	-1.7398	-0.576658	0.126686	-0.735818	-0.405814	-0.151281	0.0672155	0.0667332	0.0544073	0.0688227
3113	HLA-DPA1	0.308758	0.188266	1.64001	0.101003	0.821092	0	3.82452	0.281047	2.64341	-0.0918099	0.618701	0.412729	0.75541	-0.031476	0.283773	0.122226	0.0816649	0.117539	0.210368	0.0877
9752	PCDHA9	0.181532	0.110651	1.64059	0.100883	0.821092	0	0.741412	0.863423	0.763211	0.389336	-0.0596158	1.64174	0.168258	0.0803758	-0.0318162	0.281036	0.0486032	0.0426189	0.284822	0.0293032
143662	MUC15	0.224615	0.137017	1.63932	0.101146	0.821476	0	1.69662	0.637685	0.178466	0.274766	1.28967	1.6166	0.049995	0.0688338	0.457609	0.396218	0.0784771	0.0627593	0.125901	0.0600705
115950	ZNF653	0.259718	0.158466	1.63895	0.101224	0.821694	0	2.61957	0.454069	1.85852	1.33301	0.117431	-0.246796	0.556612	0.376975	0.0537577	-0.0731024	0.0896953	0.0799752	0.209562	0.0877378
5229	PGGT1B	0.284224	0.1735	1.63817	0.101386	0.822173	0	3.37054	0.337945	1.38529	-0.687399	1.61139	1.21591	0.433516	-0.250757	0.739976	0.305614	0.0979327	0.133072	0.21088	0.0631745
7518	XRCC4	0.452825	0.276384	1.63839	0.10134	0.822173	63.8387	11.0616	0.0113977	3.15264	-0.974131	2.51373	1.44725	0.838619	-0.258544	0.968463	0.373438	0.0707587	0.0704422	0.148432	0.0665813
8148	TAF15	0.297625	0.181854	1.63662	0.10171	0.822304	7.96783	4.34631	0.226416	-0.283302	0.682561	2.56204	1.01116	-0.0799922	0.233641	0.783063	0.28798	0.0797253	0.11717	0.0934157	0.0811116
307	ANXA4	0.258936	0.158173	1.63704	0.101622	0.822304	0	3.03923	0.385616	0.0727693	-0.675485	1.50792	1.75336	0.0296124	-0.273371	0.582465	0.373775	0.165596	0.163785	0.149205	0.0454441
150372	NFAM1	-0.281932	0.172173	-1.63749	0.101528	0.822304	0	3.81676	0.281942	-0.87512	0.229657	-2.6957	-0.0303832	-0.311181	0.085378	-0.610181	-0.00948284	0.126442	0.138208	0.0512359	0.0974114
2145	EZH1	-0.288392	0.176128	-1.6374	0.101546	0.822304	15.266	4.72065	0.193433	0.214955	0.104198	-2.58437	-1.72849	0.0697218	0.0325341	-0.676761	-0.412715	0.105207	0.0974898	0.0685741	0.057012
2519	FUCA2	-0.220282	0.134586	-1.63675	0.101684	0.822304	0	1.45807	0.691981	-0.575603	-1.58147	-1.10822	-0.276574	-0.146788	-0.416372	-0.459374	-0.0624954	0.0650334	0.0693174	0.171823	0.0510592
201895	SMIM14	-0.260275	0.159028	-1.63666	0.101701	0.822304	0	3.69157	0.296753	-0.492299	0.345794	-2.23573	-1.28414	-0.139555	0.107167	-0.726533	-0.312399	0.0803584	0.0960484	0.105602	0.0591823
10057	ABCC5	0.366751	0.224608	1.63285	0.102501	0.822516	59.8403	9.96023	0.0189072	3.2091	1.11307	2.26431	-0.786934	0.826758	0.291434	0.570918	-0.171192	0.0663727	0.0685541	0.0635734	0.0473249
27286	SRPX2	0.251504	0.153925	1.63394	0.102272	0.822516	0	2.14402	0.543058	0.521589	1.27284	1.69693	0.204951	0.145222	0.385423	0.760292	0.0559496	0.077519	0.0916908	0.200739	0.0745233
9260	PDLIM7	0.244741	0.14991	1.63259	0.102556	0.822516	0	1.38574	0.708881	0.666795	1.67424	-0.0208788	0.896068	0.191809	0.54773	-0.00752332	0.228579	0.0827473	0.107028	0.12984	0.0650715
285025	CCDC141	0.207177	0.126935	1.63215	0.102648	0.822516	0	0.797718	0.850013	0.127433	0.808569	0.775522	1.47993	0.0339298	0.176659	0.303109	0.327161	0.0708924	0.047735	0.15276	0.0488702
80834	TAS1R2	-0.338609	0.207129	-1.63478	0.102096	0.822516	47.5679	7.62892	0.0543369	0.0648013	0.391301	-2.68231	-3.30911	0.0186984	0.123495	-0.725404	-0.613537	0.083261	0.0996045	0.0731379	0.0343762
1265	CNN2	0.307757	0.18818	1.63544	0.101958	0.822516	33.1809	5.98631	0.112278	0.319727	-0.382527	3.29245	1.39946	0.0916125	-0.132651	0.767575	0.312235	0.0821015	0.120253	0.0543504	0.0497789
2582	GALE	-0.191159	0.117016	-1.63362	0.102339	0.822516	0	0.382857	0.943761	-0.73044	-0.65494	-0.135725	-1.43898	-0.171277	-0.162878	-0.0444844	-0.265538	0.0549832	0.0618475	0.107422	0.0340522
23632	CA14	0.305111	0.186905	1.63244	0.102586	0.822516	14.2534	4.66491	0.198044	0.489512	2.8305	-0.617268	1.03282	0.132822	0.761201	-0.35131	0.243184	0.0736231	0.0723225	0.323917	0.0554397
122809	SOCS4	-0.368325	0.225694	-1.63197	0.102687	0.822516	42.2246	6.92337	0.0743809	-1.83465	-2.55911	1.35804	-2.00363	-0.53175	-0.773161	0.589616	-0.426005	0.0840052	0.091277	0.188502	0.0452061
200132	TCTEX1D1	0.30816	0.188705	1.63303	0.102464	0.822516	0	2.03226	0.565737	-0.0104191	-0.0418691	1.03847	1.9023	-0.00437087	-0.0171188	0.546973	0.531428	0.175985	0.16717	0.277424	0.0780423
80309	SPHKAP	-0.379279	0.232126	-1.63394	0.102272	0.822516	36.1258	6.26231	0.0995226	-2.63755	-1.73098	-1.18757	0.743566	-0.803826	-0.442748	-0.580846	0.220315	0.0928801	0.0654229	0.239223	0.0877908
7180	CRISP2	0.380282	0.232686	1.63432	0.102193	0.822516	0	3.52394	0.31767	-0.0612177	-0.00894964	0.604885	2.64513	-0.0277714	-0.00385042	0.441197	0.800653	0.205798	0.1851	0.532009	0.0916211
4675	NAP1L3	-0.355445	0.21741	-1.63491	0.102068	0.822516	34.8193	6.13679	0.105142	-2.51331	-0.457703	0.792665	-2.6419	-0.805362	-0.156527	0.295709	-0.557129	0.102681	0.116953	0.139172	0.0444713
84504	NKX6-2	0.207613	0.127031	1.63434	0.102187	0.822516	0	2.96149	0.397601	-0.0683123	1.24507	-0.65669	1.90957	-0.0159778	0.272171	-0.39747	0.426635	0.0547062	0.0477852	0.366343	0.0499165
2895	GRID2	-0.448079	0.274625	-1.6316	0.102763	0.822516	72.8706	14.7441	0.00204889	-1.91287	-3.33188	-2.51065	1.14089	-0.444384	-0.734197	-1.04652	0.21891	0.0539693	0.0485562	0.173751	0.0368168
51035	UBXN1	0.406461	0.249096	1.63175	0.102733	0.822516	66.1849	11.829	0.00799237	2.79722	4.11806	-1.43563	1.68085	0.585107	0.798846	-0.445888	0.54446	0.043754	0.0376306	0.0964638	0.104924
9636	ISG15	-0.309711	0.189601	-1.63349	0.102366	0.822516	0.396904	4.01594	0.259748	-0.58442	-0.783	-2.5504	0.0727429	-0.194684	-0.261495	-0.869204	0.0222076	0.110971	0.111533	0.116152	0.0932015
196	AHR	-0.26667	0.163409	-1.63192	0.102697	0.822516	0	1.90132	0.593138	-0.0329707	-0.73534	0.230163	-1.99241	-0.0125845	-0.272609	0.0996927	-0.469887	0.145684	0.137437	0.187609	0.0556199
84109	QRFPR	-0.251311	0.153647	-1.63564	0.101914	0.822516	0	0.948735	0.813654	-0.166981	-1.19784	0.111525	-1.46592	-0.0605283	-0.379134	0.0537716	-0.32404	0.131396	0.100181	0.232467	0.0488626
143941	TTC36	-0.269132	0.164918	-1.63191	0.102698	0.822516	0	3.28792	0.349327	-1.09542	-0.615763	-2.11189	-0.124697	-0.367124	-0.197776	-0.899403	-0.0302931	0.112321	0.103162	0.18137	0.0590164
10420	TESK2	0.330449	0.202843	1.62909	0.103294	0.823065	15.9211	4.75743	0.190445	-0.0986493	0.573936	0.900069	2.83787	-0.0270495	0.166641	0.528927	0.770271	0.075185	0.0843018	0.345335	0.0736718
1236	CCR7	-0.260598	0.159934	-1.62941	0.103226	0.823065	0	2.53683	0.468672	0.394965	-1.67963	-1.21635	-0.857401	0.120066	-0.520593	-0.451843	-0.263132	0.0924109	0.0960657	0.137993	0.0941848
26121	PRPF31	0.231783	0.142222	1.62973	0.103159	0.823065	0	2.36245	0.500662	-0.333421	1.79164	1.16677	0.579625	-0.097908	0.467442	0.380419	0.156348	0.0862283	0.0680696	0.106305	0.0727592
10990	LILRB5	-0.407723	0.250162	-1.62983	0.103137	0.823065	47.2372	7.5811	0.0555108	0.31813	-2.08092	0.171524	-4.01166	0.0964681	-0.613087	0.102134	-0.831328	0.0919511	0.086803	0.354564	0.0429433
28978	TMEM14A	-0.280782	0.172165	-1.63089	0.102914	0.823065	0	3.06348	0.381941	0.719118	-1.26922	-0.741534	-1.77346	0.258439	-0.542096	-0.311221	-0.446344	0.129156	0.182423	0.176147	0.0633431
51422	PRKAG2	-0.19967	0.122561	-1.62915	0.103281	0.823065	0	1.77654	0.620053	0.347879	-0.736684	-1.02305	-1.64934	0.0903166	-0.193486	-0.293559	-0.329244	0.0674031	0.0689819	0.0823366	0.0398489
51071	DERA	-0.207418	0.127212	-1.6305	0.102997	0.823065	0	2.61816	0.454315	-1.19954	-0.0248043	0.133997	-1.95428	-0.251179	-0.00624653	0.0448686	-0.516787	0.043847	0.0634199	0.112123	0.0699278
7980	TFPI2	-0.446772	0.274072	-1.63013	0.103074	0.823065	67.5279	12.3183	0.00636876	-1.27984	-4.7884	0.380791	-1.16194	-0.291216	-1.22694	0.180135	-0.247743	0.0517748	0.0656544	0.223782	0.0454608
136319	MTPN	-0.238094	0.146053	-1.63019	0.103061	0.823065	0	3.36663	0.338476	-2.38251	-0.31783	0.577131	-0.74811	-0.525378	-0.0892455	0.231366	-0.198436	0.0486266	0.0788469	0.160712	0.0703577
83897	KRTAP3-2	-0.47864	0.294049	-1.62776	0.103577	0.824905	74.4106	15.6315	0.00134931	-0.779637	0.361081	-1.99305	-5.69905	-0.18746	0.0907628	-0.943406	-0.97489	0.057814	0.063184	0.224057	0.0292622
1847	DUSP5	0.277854	0.171278	1.62224	0.104752	0.825211	0	1.18651	0.756242	1.28021	-0.215599	0.790405	1.22801	0.416764	-0.0807898	0.354451	0.346536	0.105978	0.140418	0.2011	0.0796333
3275	PRMT2	0.203158	0.125226	1.62233	0.104732	0.825211	0	3.36919	0.338128	0.597767	0.224335	-0.224735	2.46729	0.141449	0.0533393	-0.066677	0.488976	0.055993	0.0565328	0.0880256	0.0392767
5756	TWF1	0.292432	0.180115	1.62358	0.104466	0.825211	3.3404	4.13823	0.246919	1.05703	-0.31363	2.41206	0.803522	0.392771	-0.121712	0.835969	0.156124	0.138071	0.150602	0.120117	0.0377522
58504	ARHGAP22	-0.369633	0.227438	-1.6252	0.104119	0.825211	32.8437	5.95625	0.113758	-2.44706	0.27295	-2.13642	-0.27974	-0.787999	0.0998888	-0.782006	-0.0711202	0.103696	0.133926	0.133983	0.0646363
146198	ZFP90	-0.206881	0.127425	-1.62354	0.104473	0.825211	0	2.17194	0.537497	-1.09683	-0.155074	0.00860624	-1.89227	-0.258583	-0.0403495	0.00238556	-0.475913	0.0555807	0.0677011	0.0768338	0.0632541
94005	PIGS	0.184763	0.113567	1.6269	0.103758	0.825211	0	1.83106	0.608199	1.52434	-0.199227	1.09849	0.952834	0.31712	-0.0411222	0.314519	0.219995	0.0432799	0.0426045	0.0819787	0.0533077
[truncated: 13,905 more rows]
