# Supplementary material for: Perinatal granulopoiesis and risk of pediatric asthma
Source: eLife. 2021 Feb 10;10:e63745. doi: 10.7554/eLife.63745 (PMC7889076; doi:10.7554/eLife.63745)
Supplement: Supplementary file 5. [file elife-63745-supp5.xlsx]

## Sheet: Sheet1
	UIH Cohort
N	30
Mother
Pre-pregnancy BMI category, kg/m2, %
. Underweight (<18.5)	0	0
. Normal (18.5-<25.0)	13	0.433333
. Overweight (25.0-<30.0)	2	0.0666667
. Obese (>=30.0)	15	0.5
Pre-pregnancy BMI, kg/m2	28.45	6.95
Race/ethnicity, %
. White	8	0.266667
. Black	14	0.466667
. Hispanic	7	0.233333
. Other	1	0.0333333
>= college graduate, %
. No	22	0.733333
. Yes	8	0.266667
History of atopy, %
. No	14	0.466667
. Yes	16	0.533333
Any antibiotics during pregnancy, %
. No	29	0.966667
. Yes	1	0.0333333
Pregnancy smoking status, %
. Never	18	0.6
. Former	7	0.233333
. During pregnancy	5	0.166667
C-section, %
. No	20	0.666667
. Yes	10	0.333333
Child
Gestational age, weeks, mean (SD)	38.96	1.4
Gestational age category, %
. <37 w	2	0.0666667
. 37-<42 w	28	0.933333
. >=42 w	0	0
Birthweight in g, mean (SD)	3250	480.94
Sex
. Male	16	0.533333
. Female	14	0.466667
