# Supplementary material for: Perinatal granulopoiesis and risk of pediatric asthma
Source: eLife. 2021 Feb 10;10:e63745. doi: 10.7554/eLife.63745 (PMC7889076; doi:10.7554/eLife.63745)
Supplement: Supplementary file 6. [file elife-63745-supp6.xlsx]

## Sheet: res_ARisk_mod1
Gene Expression Modeled as Function of Number of Risk Factors: Male, <3000g Birthweight, <37 wks Gestational Age, >30 Maternal Pre-pregnancy BMI
ENMBL_ID	HGNC_ID	baseMean	Coef	SE	Zstat	pvalue	p-adj (FDR)
ENSG00000223980	HLA-A	1294.11	3.34502	0.549127	6.09153	1.11837e-09	1.57075e-05
ENSG00000225630	MTND2P28	148.786	1.91892	0.402632	4.76596	1.8796e-06	0.0131995
ENSG00000164237	CMBL	55.3915	1.14556	0.295675	3.87438	0.000106895	0.308642
ENSG00000130032	PRRG3	66.6905	-1.64586	0.429507	-3.83198	0.000127115	0.308642
ENSG00000231834	HLA-A	401.434	1.54176	0.402752	3.82806	0.000129158	0.308642
ENSG00000281935	DNAH10	55.9811	-1.14431	0.299326	-3.82297	0.000131851	0.308642
ENSG00000100628	ASB2	15.6713	0.904922	0.245182	3.69082	0.000223531	0.448499
ENSG00000137648	TMPRSS4	37.0467	1.09594	0.316399	3.4638	0.000532597	0.830941
ENSG00000164047	CAMP	2154.34	-0.757015	0.21954	-3.44818	0.000564379	0.830941
ENSG00000196236	XPNPEP3	173.965	-0.472607	0.138246	-3.41861	0.000629429	0.830941
ENSG00000235169	SMIM1	445.992	0.969637	0.285566	3.3955	0.000685045	0.830941
ENSG00000182759	MAFA	8.34504	0.841717	0.248609	3.38571	0.000709953	0.830941
ENSG00000188976	NOC2L	963.946	0.508118	0.153647	3.30704	0.000942879	0.999721
ENSG00000096006	CRISP3	1837.01	-0.704834	0.214839	-3.28075	0.00103532	0.999721
ENSG00000260007		63.9415	0.483406	0.149002	3.2443	0.00117738	0.999721
ENSG00000130741	EIF2S3	3324.09	-0.224081	0.0693824	-3.22966	0.00123938	0.999721
ENSG00000124469	CEACAM8	1478.67	-0.718202	0.222803	-3.22348	0.00126642	0.999721
ENSG00000101425	BPI	2430.95	-0.752929	0.235082	-3.20283	0.00136083	0.999721
ENSG00000104728	ARHGEF10	66.5894	0.863944	0.270359	3.19555	0.00139566	0.999721
ENSG00000273562	NAP1L4	465.295	-1.17576	0.372086	-3.15991	0.00157818	0.999721
ENSG00000141428	C18orf21	198.39	0.334222	0.106052	3.15149	0.0016244	0.999721
ENSG00000278191	CARS	238.237	-1.32511	0.420806	-3.14897	0.00163848	0.999721
ENSG00000137267	TUBB2A	3571.18	1.21863	0.388066	3.14025	0.00168802	0.999721
ENSG00000107130	NCS1	29.0255	-1.06129	0.340656	-3.11542	0.00183682	0.999721
ENSG00000182472	CAPN12	127.468	0.562357	0.181204	3.10344	0.00191282	0.999721
ENSG00000122861	PLAU	30.4625	-0.797691	0.258288	-3.08838	0.00201253	0.999721
ENSG00000099725	PRKY	797.737	1.51817	0.497178	3.05357	0.00226135	0.999721
ENSG00000133048	CHI3L1	1249	-0.629295	0.206596	-3.04602	0.00231891	0.999721
ENSG00000167705	RILP	823.469	0.557549	0.183858	3.03249	0.00242546	0.999721
ENSG00000159921	GNE	255.176	0.330134	0.108954	3.03004	0.00244522	0.999721
ENSG00000115649	CNPPD1	4423.31	0.524216	0.174125	3.01057	0.00260762	0.999721
ENSG00000183688	RFLNB	2408.11	-0.253456	0.084248	-3.00845	0.00262587	0.999721
ENSG00000188659	SAXO2	49.6618	-1.22512	0.407426	-3.00699	0.0026385	0.999721
ENSG00000149516	MS4A3	1161.91	-0.658126	0.22012	-2.98985	0.0027911	0.999721
ENSG00000213931	HBE1	294.831	0.98509	0.332548	2.96225	0.00305398	0.999721
ENSG00000128438	TBC1D27P	47.3291	0.59614	0.202248	2.94757	0.00320281	0.999721
ENSG00000211753	TRBV28	121.096	-0.643747	0.218429	-2.94716	0.00320702	0.999721
ENSG00000170522	ELOVL6	721.33	0.595136	0.202287	2.94203	0.00326067	0.999721
ENSG00000225859	DDX39B	439.097	2.10833	0.718065	2.93613	0.00332335	0.999721
ENSG00000130656	HBZ	1615.08	1.16973	0.400199	2.92288	0.00346815	0.999721
ENSG00000129355	CDKN2D	3424.79	0.473991	0.162573	2.91555	0.00355062	0.999721
ENSG00000169508	GPR183	699.388	-0.284761	0.0978925	-2.90892	0.00362682	0.999721
ENSG00000165632	TAF3	285.733	-0.156788	0.0539955	-2.90372	0.0036876	0.999721
ENSG00000278154	LAIR1	134.697	-0.553338	0.190671	-2.90206	0.00370723	0.999721
ENSG00000054356	PTPRN	66.5692	0.871782	0.30064	2.89975	0.00373455	0.999721
ENSG00000272398	CD24	3301.3	-0.493955	0.171051	-2.88776	0.00387992	0.999721
ENSG00000166736	HTR3A	15.4738	0.654394	0.227212	2.88011	0.0039754	0.999721
ENSG00000088280	ASAP3	30.6688	0.794219	0.276387	2.87358	0.00405852	0.999721
ENSG00000130396	AFDN	117.505	0.571863	0.199069	2.87269	0.00406997	0.999721
ENSG00000012223	LTF	16112.8	-0.571016	0.198879	-2.87117	0.00408961	0.999721
ENSG00000274669	LILRB1	176.994	0.791196	0.277138	2.85488	0.00430534	0.999721
ENSG00000008438	PGLYRP1	1049.6	-0.557149	0.195199	-2.85426	0.00431375	0.999721
ENSG00000106992	AK1	402.192	0.621131	0.217701	2.85314	0.00432895	0.999721
ENSG00000100968	NFATC4	44.6571	0.540649	0.190384	2.83978	0.00451445	0.999721
ENSG00000230373	GOLGA6L5P	49.5164	0.57506	0.202677	2.83731	0.00454948	0.999721
ENSG00000170801	HTRA3	57.4541	-0.742155	0.262159	-2.83093	0.00464123	0.999721
ENSG00000166825	ANPEP	1310.19	-0.424824	0.15081	-2.81695	0.00484827	0.999721
ENSG00000275365	MMP11	33.021	0.456498	0.162325	2.81224	0.00491975	0.999721
ENSG00000269226	TMSB15A	26.6002	0.375566	0.133701	2.809	0.00496958	0.999721
ENSG00000213934	HBG1	95608.5	-1.49156	0.532988	-2.79849	0.00513416	0.999721
ENSG00000188070	C11orf95	185.675	0.28697	0.102568	2.79785	0.00514433	0.999721
ENSG00000126903	SLC10A3	272.321	0.224191	0.0803698	2.78949	0.00527904	0.999721
ENSG00000225840		138.059	-0.784515	0.282231	-2.77969	0.00544108	0.999721
ENSG00000239920		4690.94	0.621488	0.223651	2.77883	0.00545543	0.999721
ENSG00000150782	IL18	88.169	-0.399489	0.143854	-2.77705	0.00548541	0.999721
ENSG00000160789	LMNA	225.839	0.454957	0.163926	2.77538	0.00551379	0.999721
ENSG00000259479	SORD2P	42.266	0.717135	0.258858	2.77038	0.00559911	0.999721
ENSG00000166866	MYO1A	12.0734	-0.766673	0.276773	-2.77004	0.00560486	0.999721
ENSG00000181126	HLA-V	21.9638	1.0611	0.383245	2.76873	0.00562756	0.999721
ENSG00000106258	CYP3A5	48.8816	0.868414	0.314722	2.75931	0.00579243	0.999721
ENSG00000173391	OLR1	362.616	-0.666717	0.242293	-2.75169	0.00592878	0.999721
ENSG00000174306	ZHX3	208.616	0.325442	0.118601	2.744	0.00606955	0.999721
ENSG00000108641	B9D1	12.6729	0.506015	0.184496	2.74269	0.00609379	0.999721
ENSG00000111843	TMEM14C	565.06	0.251864	0.09217	2.7326	0.00628365	0.999721
ENSG00000174384	PMS2P6	37.5747	0.340975	0.124847	2.73115	0.00631143	0.999721
ENSG00000114416	FXR1	1510.56	-0.110441	0.0404832	-2.72806	0.00637081	0.999721
ENSG00000167244	IGF2	321.094	0.64715	0.238222	2.71659	0.00659591	0.999721
ENSG00000184106	TREML3P	96.2116	0.697372	0.257091	2.71255	0.0066768	0.999721
ENSG00000108309	RUNDC3A	1520.19	0.575664	0.213238	2.69963	0.0069417	0.999721
ENSG00000086548	CEACAM6	880.69	-0.681716	0.254022	-2.68369	0.00728149	0.999721
ENSG00000144567	RETREG2	2469.1	0.347077	0.129359	2.68305	0.00729551	0.999721
ENSG00000282339		60.6755	0.768383	0.286398	2.68292	0.00729816	0.999721
ENSG00000242550	SERPINB10	257.777	-0.60454	0.225622	-2.67943	0.00737473	0.999721
ENSG00000007944	MYLIP	906.486	0.140728	0.0526209	2.67437	0.00748704	0.999721
ENSG00000148200	NR6A1	29.6188	-0.393072	0.14711	-2.67196	0.00754101	0.999721
ENSG00000171101	SIGLEC17P	45.7789	-0.403107	0.150913	-2.67112	0.00755988	0.999721
ENSG00000169385	RNASE2	541.769	-0.628168	0.235492	-2.66747	0.00764241	0.999721
ENSG00000160948	VPS28	231.535	0.639589	0.239936	2.66567	0.00768346	0.999721
ENSG00000250264		53.4422	-1.73959	0.656708	-2.64895	0.00807415	0.999721
ENSG00000155792	DEPTOR	26.4972	0.325645	0.122984	2.64787	0.00809995	0.999721
ENSG00000175567	UCP2	10693.7	0.290539	0.11007	2.6396	0.00830048	0.999721
ENSG00000271121	NUDT4P2	230.976	0.467793	0.177408	2.63682	0.0083688	0.999721
ENSG00000163046	ANKRD30BL	112.816	-0.571452	0.216778	-2.63611	0.00838617	0.999721
ENSG00000184983	NDUFA6	64.9678	-0.932797	0.354067	-2.63452	0.00842557	0.999721
ENSG00000102287	GABRE	24.8365	0.753099	0.286802	2.62585	0.00864319	0.999721
ENSG00000211666	IGLV2-14	101.156	0.476279	0.181674	2.62161	0.00875145	0.999721
ENSG00000129682	FGF13	103.222	-0.715262	0.274376	-2.60687	0.00913751	0.999721
ENSG00000089847	ANKRD24	17.6806	0.783151	0.300728	2.60418	0.00920938	0.999721
ENSG00000198858	R3HDM4	9840.61	0.42889	0.164839	2.60187	0.00927159	0.999721
ENSG00000274810	NPHP3-ACAD11	38.0078	1.05846	0.407623	2.59666	0.0094136	0.999721
ENSG00000105371	ICAM4	122.446	0.3304	0.127337	2.5947	0.00946735	0.999721
ENSG00000229036	VDAC1P8	11.6836	0.605576	0.234119	2.58662	0.00969231	0.999721
ENSG00000158525	CPA5	113.492	-0.904523	0.350525	-2.58048	0.00986627	0.999721
ENSG00000124107	SLPI	168.789	-0.707846	0.274444	-2.5792	0.00990287	0.999721
ENSG00000117425	PTCH2	18.5859	0.401192	0.155557	2.57907	0.00990662	0.999721
ENSG00000173868	PHOSPHO1	9958.43	0.498445	0.193519	2.57569	0.0100041	0.999721
ENSG00000164953	TMEM67	52.8215	0.411491	0.159762	2.57565	0.0100052	0.999721
ENSG00000173581	CCDC106	85.3624	0.242667	0.0944128	2.57027	0.0101618	0.999721
ENSG00000273802	HIST1H2BG	26.8193	0.509263	0.198517	2.56534	0.0103075	0.999721
ENSG00000169918	OTUD7A	66.283	0.549743	0.214797	2.55936	0.0104865	0.999721
ENSG00000133063	CHIT1	416.957	-0.491799	0.192696	-2.5522	0.0107044	0.999721
ENSG00000163814	CDCP1	31.4032	0.659748	0.259372	2.54363	0.0109707	0.999721
ENSG00000132967	HMGB1P5	109.61	1.04605	0.411263	2.54349	0.010975	0.999721
ENSG00000167483	FAM129C	1339.28	0.304139	0.119806	2.53859	0.01113	0.999721
ENSG00000237854	LINC00674	37.1636	-0.587219	0.231632	-2.53513	0.0112405	0.999721
ENSG00000133302	SLF1	187.997	-0.243187	0.0959533	-2.53443	0.0112632	0.999721
ENSG00000105429	MEGF8	229.579	0.274652	0.108662	2.52757	0.0114854	0.999721
ENSG00000123219	CENPK	247.669	-0.340555	0.134874	-2.52498	0.0115704	0.999721
ENSG00000160714	UBE2Q1	1099.55	0.154988	0.0614162	2.52357	0.011617	0.999721
ENSG00000215580	BCORP1	173.724	1.47031	0.583893	2.51812	0.0117985	0.999721
ENSG00000163684	RPP14	229.32	0.231743	0.0921839	2.51392	0.0119398	0.999721
ENSG00000132002	DNAJB1	1754.02	-0.166715	0.0663214	-2.51374	0.0119459	0.999721
ENSG00000165507	DEPP1	80.7667	0.633758	0.253261	2.50239	0.0123357	0.999721
ENSG00000167768	KRT1	7038.16	0.593494	0.237354	2.50046	0.0124033	0.999721
ENSG00000124440	HIF3A	32.9947	0.81904	0.32769	2.49943	0.0124392	0.999721
ENSG00000112715	VEGFA	395.177	-0.290067	0.116162	-2.49709	0.0125217	0.999721
ENSG00000206140	TMEM191C	20.3419	0.504852	0.202765	2.48984	0.01278	0.999721
ENSG00000110042	DTX4	212.483	0.3248	0.130474	2.48939	0.0127961	0.999721
ENSG00000261884		126.439	0.341271	0.137298	2.48562	0.0129327	0.999721
ENSG00000151689	INPP1	129.906	-0.279389	0.112411	-2.48542	0.01294	0.999721
ENSG00000228409	CCT6P1	70.2339	0.201405	0.081053	2.48485	0.0129605	0.999721
ENSG00000272636	DOC2B	59.3988	-0.794953	0.319972	-2.48444	0.0129754	0.999721
ENSG00000143889	HNRNPLL	310.754	-0.212277	0.0855691	-2.48077	0.0131101	0.999721
ENSG00000110203	FOLR3	412.838	-0.584982	0.236073	-2.47797	0.0132132	0.999721
ENSG00000124882	EREG	194.019	-0.659748	0.266754	-2.47325	0.0133892	0.999721
ENSG00000226060	TRIM26	329.734	-0.468207	0.189697	-2.46819	0.0135799	0.999721
ENSG00000185829	ARL17A	256.444	0.304496	0.123404	2.46747	0.0136071	0.999721
ENSG00000163606	CD200R1	296.271	-0.314608	0.127691	-2.46382	0.0137466	0.999721
ENSG00000063438	AHRR	27.1556	-0.661599	0.268717	-2.46207	0.0138139	0.999721
ENSG00000086717	PPEF1	21.3415	-0.764865	0.31081	-2.46088	0.0138598	0.999721
ENSG00000106366	SERPINE1	23.8004	0.597147	0.242783	2.45959	0.0139095	0.999721
ENSG00000134827	TCN1	971.461	-0.528317	0.21491	-2.45832	0.0139589	0.999721
ENSG00000134627	PIWIL4	143.454	-0.409318	0.166523	-2.45803	0.0139702	0.999721
ENSG00000131941	RHPN2	17.6211	0.622152	0.253194	2.45721	0.014002	0.999721
ENSG00000256984		23.5637	-0.68244	0.278387	-2.4514	0.01423	0.999721
ENSG00000150967	ABCB9	23.3998	0.406959	0.166052	2.45079	0.0142544	0.999721
ENSG00000143545	RAB13	133.053	-0.412045	0.168186	-2.44994	0.0142881	0.999721
ENSG00000162772	ATF3	52.9139	-0.541799	0.221581	-2.44515	0.0144793	0.999721
ENSG00000187837	HIST1H1C	435.32	0.344385	0.141435	2.43494	0.0148944	0.999721
ENSG00000186184	POLR1D	3751.31	0.272485	0.112388	2.4245	0.0153293	0.999721
ENSG00000142583	SLC2A5	241.815	-0.547031	0.225659	-2.42414	0.0153446	0.999721
ENSG00000109971	HSPA8	12598.5	-0.181873	0.075056	-2.42316	0.015386	0.999721
ENSG00000091127	PUS7	141.073	0.407474	0.16824	2.42198	0.0154363	0.999721
ENSG00000205659	LIN52	211.239	0.322108	0.13312	2.41968	0.0155342	0.999721
ENSG00000141013	GAS8	36.7574	0.422449	0.174621	2.41924	0.0155531	0.999721
ENSG00000169249	ZRSR2	379.501	-0.228698	0.0947507	-2.41368	0.0157922	0.999721
ENSG00000154027	AK5	226.153	-0.320133	0.132796	-2.41071	0.0159215	0.999721
ENSG00000148288	GBGT1	250.561	0.250992	0.104188	2.40903	0.0159949	0.999721
ENSG00000198888	MT-ND1	13613.9	-0.280324	0.116473	-2.40676	0.0160948	0.999721
ENSG00000169397	RNASE3	303.567	-0.711569	0.296288	-2.40161	0.0163229	0.999721
ENSG00000214595	EML6	68.3928	0.591641	0.246725	2.39798	0.0164857	0.999721
ENSG00000169855	ROBO1	138.957	0.38287	0.159868	2.39491	0.0166246	0.999721
ENSG00000133401	PDZD2	25.5842	-0.50644	0.211821	-2.39089	0.0168078	0.999721
ENSG00000112584	FAM120B	595.195	-0.109438	0.0458011	-2.38941	0.0168753	0.999721
ENSG00000106560	GIMAP2	1409.7	-0.148268	0.0621728	-2.38478	0.0170896	0.999721
ENSG00000155966	AFF2	257.642	-0.375239	0.15755	-2.38172	0.0172319	0.999721
ENSG00000198252	STYX	664.505	-0.199929	0.0839992	-2.38012	0.0173068	0.999721
ENSG00000160216	AGPAT3	1571.79	0.206332	0.0867929	2.37729	0.0174406	0.999721
ENSG00000227277	RNF5	454.594	0.266759	0.11245	2.37224	0.0176807	0.999721
ENSG00000182240	BACE2	108.545	0.384334	0.162014	2.37223	0.017681	0.999721
ENSG00000100558	PLEK2	203.804	0.468205	0.19737	2.37222	0.0176815	0.999721
ENSG00000115902	SLC1A4	146.014	-0.28503	0.120157	-2.37214	0.0176856	0.999721
ENSG00000146776	ATXN7L1	224.195	-0.154206	0.0650837	-2.36935	0.0178195	0.999721
ENSG00000132906	CASP9	214.461	0.162286	0.0684979	2.36921	0.017826	0.999721
ENSG00000140848	CPNE2	472.923	-0.282128	0.119102	-2.3688	0.0178459	0.999721
ENSG00000204856	FAM216A	100.612	0.206712	0.0875148	2.36202	0.0181758	0.999721
ENSG00000178199	ZC3H12D	167.945	0.314789	0.133328	2.36101	0.0182253	0.999721
ENSG00000196407	THEM5	404.171	0.688115	0.291733	2.35871	0.0183384	0.999721
ENSG00000012817	KDM5D	816.499	1.30826	0.555816	2.35376	0.0185847	0.999721
ENSG00000197816	CCDC180	109.026	0.597943	0.254049	2.35365	0.0185901	0.999721
ENSG00000164002	EXO5	102.92	0.200417	0.0851709	2.35312	0.0186166	0.999721
ENSG00000185436	IFNLR1	51.1974	0.419433	0.17831	2.35227	0.0186592	0.999721
ENSG00000143476	DTL	107.56	-0.371756	0.158478	-2.34578	0.0189871	0.999721
ENSG00000067048	DDX3Y	1256.56	1.34815	0.575059	2.34437	0.0190593	0.999721
ENSG00000122547	EEPD1	201.615	-0.27462	0.11719	-2.34337	0.0191105	0.999721
ENSG00000271601	LIX1L	646.179	-0.108797	0.0464727	-2.34109	0.0192275	0.999721
ENSG00000169131	ZNF354A	427.952	-0.149921	0.0642042	-2.33506	0.0195401	0.999721
ENSG00000105701	FKBP8	31441.4	0.448591	0.192365	2.33197	0.0197022	0.999721
ENSG00000130513	GDF15	31.5057	0.530304	0.227619	2.32979	0.0198171	0.999721
ENSG00000143184	XCL1	25.7562	-0.427377	0.183479	-2.32929	0.0198436	0.999721
ENSG00000158163	DZIP1L	32.5606	-0.575174	0.247045	-2.32821	0.0199009	0.999721
ENSG00000085231	AK6	152.105	-0.26636	0.114441	-2.32749	0.0199391	0.999721
ENSG00000283777	CANX	2806.31	-0.448366	0.192861	-2.32481	0.0200821	0.999721
ENSG00000186376	ZNF75D	367.113	-0.146675	0.0630985	-2.32454	0.0200964	0.999721
ENSG00000204219	TCEA3	96.8654	-0.250587	0.107872	-2.323	0.0201792	0.999721
ENSG00000070081	NUCB2	1409.93	-0.226601	0.0975979	-2.32178	0.0202445	0.999721
ENSG00000203965	EFCAB7	94.3482	0.302316	0.131003	2.30771	0.0210155	0.999721
ENSG00000248769		30.0168	0.623389	0.270331	2.30602	0.0211094	0.999721
ENSG00000116128	BCL9	286.234	0.300043	0.130392	2.30109	0.0213867	0.999721
ENSG00000157036	EXOG	188.173	0.38327	0.166769	2.29821	0.0215499	0.999721
ENSG00000068323	TFE3	1296.95	0.250656	0.109142	2.2966	0.0216413	0.999721
ENSG00000204837	FGF7P3	33.8187	0.424674	0.184988	2.29569	0.0216939	0.999721
ENSG00000168395	ING5	608.789	0.163336	0.0711665	2.29513	0.0217258	0.999721
ENSG00000148225	WDR31	25.3376	0.532132	0.231985	2.29382	0.0218008	0.999721
ENSG00000164818	DNAAF5	222.746	0.242806	0.105884	2.29314	0.0218399	0.999721
ENSG00000108352	RAPGEFL1	46.351	0.42261	0.184495	2.29063	0.0219847	0.999721
ENSG00000088826	SMOX	1545.87	0.518952	0.226784	2.28831	0.0221197	0.999721
ENSG00000168268	NT5DC2	81.9695	0.348424	0.152478	2.28507	0.0223086	0.999721
ENSG00000131876	SNRPA1	434.928	0.13453	0.0588963	2.28418	0.0223607	0.999721
ENSG00000154222	CC2D1B	637.822	0.279302	0.122336	2.28308	0.0224259	0.999721
ENSG00000105967	TFEC	691.31	0.49923	0.218689	2.28283	0.0224406	0.999721
ENSG00000173621	LRFN4	84.6955	0.335553	0.147051	2.28188	0.0224963	0.999721
ENSG00000275600	PIGW	128.661	0.230381	0.101092	2.27892	0.022672	0.999721
ENSG00000156381	ANKRD9	1306.4	0.453436	0.199	2.27858	0.0226922	0.999721
ENSG00000151117	TMEM86A	47.5514	0.410073	0.180187	2.27582	0.0228569	0.999721
ENSG00000187122	SLIT1	14.2428	0.670951	0.294849	2.27557	0.0228715	0.999721
ENSG00000104904	OAZ1	19742.7	0.320205	0.141089	2.26953	0.0232361	0.999721
ENSG00000136378	ADAMTS7	13.5857	0.54172	0.238755	2.26894	0.0232722	0.999721
ENSG00000112414	ADGRG6	57.1569	0.594243	0.262096	2.26727	0.0233737	0.999721
ENSG00000250318		18.3853	-0.478497	0.211181	-2.26581	0.0234627	0.999721
ENSG00000063180	CA11	100.909	-0.284085	0.125408	-2.26528	0.0234955	0.999721
ENSG00000092067	CEBPE	210.513	-0.466523	0.205968	-2.26502	0.0235113	0.999721
ENSG00000086506	HBQ1	1007.07	0.489103	0.216011	2.26425	0.0235588	0.999721
ENSG00000198899	MT-ATP6	7801.74	-0.308723	0.136658	-2.2591	0.0238774	0.999721
ENSG00000197403	OR6N1	37.0757	-0.948751	0.42003	-2.25877	0.0238976	0.999721
ENSG00000211796	TRAV16	16.7559	-0.395799	0.1756	-2.25398	0.0241975	0.999721
ENSG00000229215	HLA-A	2917.46	-1.14055	0.506935	-2.24989	0.0244557	0.999721
ENSG00000187017	ESPN	1070.24	0.632874	0.281411	2.24893	0.0245169	0.999721
ENSG00000167632	TRAPPC9	348.441	-0.174058	0.0774039	-2.2487	0.0245317	0.999721
ENSG00000204304	PBX2	587.331	0.41975	0.18692	2.24561	0.0247292	0.999721
ENSG00000151164	RAD9B	20.3509	0.538478	0.239953	2.2441	0.024826	0.999721
ENSG00000198551	ZNF627	160.654	0.197403	0.0882789	2.23612	0.0253437	0.999721
ENSG00000184731	FAM110C	18.515	-0.597801	0.26781	-2.23218	0.0256032	0.999721
ENSG00000131002	TXLNGY	1182.28	1.26846	0.568789	2.2301	0.0257409	0.999721
ENSG00000187240	DYNC2H1	38.4694	0.543036	0.243777	2.2276	0.0259074	0.999721
ENSG00000187800	PEAR1	76.7561	0.478344	0.214804	2.22689	0.0259545	0.999721
ENSG00000167881	SRP68	805.549	0.181837	0.0816607	2.22673	0.0259651	0.999721
ENSG00000173674	EIF1AX	1339.65	-0.210845	0.0947487	-2.22531	0.0260607	0.999721
ENSG00000164124	TMEM144	92.4808	-0.346499	0.155974	-2.22153	0.0263153	0.999721
ENSG00000179526	SHARPIN	727.911	0.253983	0.114378	2.22056	0.0263811	0.999721
ENSG00000113811	SELENOK	1025.03	0.344373	0.155254	2.21812	0.0265464	0.999721
ENSG00000067646	ZFY	163.119	1.41265	0.637479	2.21599	0.0266919	0.999721
ENSG00000149809	TM7SF2	129.388	0.270964	0.122364	2.2144	0.026801	0.999721
ENSG00000113569	NUP155	348.841	-0.174671	0.0788999	-2.21384	0.02684	0.999721
ENSG00000149016	TUT1	289.2	0.25333	0.114609	2.21038	0.0270791	0.999721
ENSG00000186583	SPATC1	14.0685	-0.558909	0.252987	-2.20924	0.0271579	0.999721
ENSG00000274229	SOCS7	117.611	0.470706	0.213167	2.20815	0.0272335	0.999721
ENSG00000198839	ZNF277	439.912	-0.190322	0.0862276	-2.2072	0.0273001	0.999721
ENSG00000144642	RBMS3	22.3946	-0.588333	0.266768	-2.20541	0.0274254	0.999721
ENSG00000163661	PTX3	153.676	-0.404495	0.183723	-2.20165	0.0276897	0.999721
ENSG00000271303	SRXN1	932.186	0.361325	0.164327	2.19882	0.0278908	0.999721
ENSG00000148341	SH3GLB2	1102.45	0.254068	0.115752	2.19493	0.0281685	0.999721
ENSG00000102001	CACNA1F	24.4363	-0.449108	0.204619	-2.19485	0.0281747	0.999721
ENSG00000174951	FUT1	18.3761	0.675188	0.307884	2.193	0.0283077	0.999721
ENSG00000140284	SLC27A2	54.0798	-0.511257	0.233284	-2.19156	0.0284111	0.999721
ENSG00000105875	WDR91	369.332	0.299706	0.136914	2.18901	0.0285959	0.999721
ENSG00000262102	DSEL	62.6302	0.294883	0.134743	2.18849	0.0286342	0.999721
ENSG00000226752	CUTALP	837.545	0.395984	0.181157	2.18586	0.0288261	0.999721
ENSG00000189056	RELN	39.1678	0.568428	0.260274	2.18396	0.0289651	0.999721
ENSG00000071564	TCF3	1649.42	0.192146	0.0880655	2.18186	0.0291202	0.999721
ENSG00000196476	C20orf96	49.1061	0.292468	0.134053	2.18174	0.0291289	0.999721
ENSG00000243696		134.926	0.219086	0.100497	2.18003	0.0292552	0.999721
ENSG00000275949		96.9776	-0.70037	0.321328	-2.17961	0.0292863	0.999721
ENSG00000111254	AKAP3	11.5959	-0.612305	0.281221	-2.17731	0.0294576	0.999721
ENSG00000172260	NEGR1	30.3565	-0.337423	0.155086	-2.17572	0.0295763	0.999721
ENSG00000184867	ARMCX2	61.5603	0.333416	0.153326	2.17455	0.0296639	0.999721
ENSG00000242259	C22orf39	504.551	0.112658	0.0518601	2.17235	0.0298296	0.999721
ENSG00000198763	MT-ND2	11964	-0.218274	0.100504	-2.17178	0.0298719	0.999721
ENSG00000184009	ACTG1	21115.3	-0.216303	0.0996777	-2.17003	0.0300049	0.999721
ENSG00000184371	CSF1	51.4875	0.418659	0.193048	2.16868	0.0301071	0.999721
ENSG00000103502	CDIPT	1208.41	0.198764	0.0918205	2.1647	0.0304107	0.999721
ENSG00000183019	MCEMP1	975.761	-0.393777	0.182032	-2.16323	0.0305231	0.999721
ENSG00000141232	TOB1	1193.33	-0.180183	0.0833142	-2.16269	0.0305651	0.999721
ENSG00000168273	SMIM4	27.9185	0.321217	0.148552	2.16233	0.0305928	0.999721
ENSG00000211679	IGLC3	168.021	-0.491966	0.227528	-2.16222	0.0306009	0.999721
ENSG00000185710	SMG1P4	133.192	0.474909	0.219751	2.16112	0.0306861	0.999721
ENSG00000274752	TRBV12-3	20.9874	-0.384009	0.17781	-2.15966	0.0307989	0.999721
ENSG00000223629	DEFA8P	35.7133	-0.776674	0.359643	-2.15957	0.0308062	0.999721
ENSG00000050628	PTGER3	12.5219	0.483695	0.22409	2.15848	0.0308905	0.999721
ENSG00000122862	SRGN	13063.3	-0.329775	0.152925	-2.15645	0.0310488	0.999721
ENSG00000129646	QRICH2	47.2677	-0.250513	0.116207	-2.15576	0.0311028	0.999721
ENSG00000186522	43353	46.2917	0.542295	0.251697	2.15455	0.0311967	0.999721
ENSG00000157240	FZD1	60.1449	-0.350783	0.162827	-2.15433	0.0312141	0.999721
ENSG00000125868	DSTN	660.478	-0.165034	0.0766458	-2.15321	0.0313023	0.999721
ENSG00000177830	CHID1	457.624	0.221808	0.103045	2.15253	0.0313556	0.999721
ENSG00000228278	ORM2	40.4219	-0.609896	0.283479	-2.15147	0.0314395	0.999721
ENSG00000175505	CLCF1	30.2474	0.314831	0.14641	2.15033	0.031529	0.999721
ENSG00000198938	MT-CO3	22062.8	-0.274049	0.127485	-2.14966	0.0315824	0.999721
ENSG00000070159	PTPN3	18.21	0.781336	0.363512	2.14941	0.0316021	0.999721
ENSG00000143847	PPFIA4	69.2267	-0.552407	0.257027	-2.14922	0.0316173	0.999721
ENSG00000157343	ARMC12	13.149	0.44082	0.205286	2.14734	0.0317659	0.999721
ENSG00000282281	IGHV3-21	72.0376	0.265462	0.123654	2.14681	0.0318083	0.999721
ENSG00000205038	PKHD1L1	88.2269	0.697931	0.325178	2.1463	0.0318489	0.999721
ENSG00000180628	PCGF5	5849.2	0.439765	0.205481	2.14017	0.0323412	0.999721
ENSG00000183878	UTY	397.769	1.33695	0.625185	2.13849	0.0324769	0.999721
ENSG00000119812	FAM98A	301.238	-0.265719	0.124267	-2.1383	0.0324926	0.999721
ENSG00000100350	FOXRED2	72.3074	0.220532	0.10316	2.13777	0.0325351	0.999721
ENSG00000141040	ZNF287	82.4264	0.26576	0.12437	2.13685	0.0326106	0.999721
ENSG00000177868	SVBP	307.061	0.201169	0.0942013	2.13553	0.0327179	0.999721
ENSG00000184500	PROS1	47.2473	0.424691	0.198899	2.13521	0.0327439	0.999721
ENSG00000254004	ZNF260	344.179	0.29646	0.138923	2.13398	0.0328442	0.999721
ENSG00000157045	NTAN1	632.352	0.321151	0.150797	2.12969	0.0331975	0.999721
ENSG00000168439	STIP1	1134.43	-0.182817	0.0859365	-2.12735	0.0333908	0.999721
ENSG00000223532	HLA-B	3604.04	-0.681417	0.320611	-2.12537	0.0335557	0.999721
ENSG00000244437	IGKV3-15	14.6314	0.4562	0.214689	2.12494	0.0335918	0.999721
ENSG00000229496	DDX39B	3061.82	-0.255711	0.120559	-2.12105	0.0339179	0.999721
ENSG00000163682	RPL9	6753.91	-0.611298	0.288393	-2.11967	0.0340342	0.999721
ENSG00000022556	NLRP2	86.0128	0.412314	0.194615	2.11861	0.0341232	0.999721
ENSG00000166598	HSP90B1	4737.9	-0.123444	0.0582878	-2.11783	0.0341891	0.999721
ENSG00000186998	EMID1	57.0394	0.432848	0.204448	2.11716	0.0342466	0.999721
ENSG00000243064	ABCC13	983.246	0.454162	0.214544	2.11687	0.0342707	0.999721
ENSG00000185513	L3MBTL1	171.153	0.355308	0.168007	2.11484	0.0344437	0.999721
ENSG00000175137	SH3BP5L	972.243	0.180218	0.0852588	2.11378	0.0345339	0.999721
ENSG00000024862	CCDC28A	450.317	0.194354	0.0919571	2.11353	0.034555	0.999721
ENSG00000243009	RPP21	43.4256	-0.63574	0.300907	-2.11275	0.0346224	0.999721
ENSG00000206177	HBM	10295.9	0.424237	0.201335	2.10712	0.0351071	0.999721
ENSG00000159339	PADI4	2047.43	-0.319872	0.151835	-2.10671	0.035143	0.999721
ENSG00000080823	MOK	34.0781	0.413307	0.196346	2.10499	0.0352921	0.999721
ENSG00000066056	TIE1	87.2959	0.41436	0.196975	2.10362	0.035412	0.999721
ENSG00000133477	FAM83F	45.8106	0.524058	0.249231	2.1027	0.0354924	0.999721
ENSG00000184056	VPS33B	177.397	0.250555	0.119239	2.10127	0.0356169	0.999721
ENSG00000104419	NDRG1	1252.2	-0.181385	0.0863945	-2.09949	0.0357734	0.999721
ENSG00000184260	HIST2H2AC	13.8136	-0.505728	0.241092	-2.09766	0.0359355	0.999721
ENSG00000217929	CICP18	11.6092	0.486461	0.231915	2.09759	0.0359417	0.999721
ENSG00000110665	C11orf21	1905.91	0.186533	0.0893316	2.0881	0.0367892	0.999721
ENSG00000281950	SPDYE16	10.2776	0.399734	0.19149	2.08749	0.0368437	0.999721
ENSG00000154328	NEIL2	155.458	0.198957	0.0953547	2.08649	0.0369339	0.999721
ENSG00000114859	CLCN2	56.1436	0.355233	0.170315	2.08575	0.0370017	0.999721
ENSG00000162367	TAL1	2622.41	0.406302	0.19491	2.08456	0.0371088	0.999721
ENSG00000138381	ASNSD1	844.136	-0.210519	0.101105	-2.08219	0.037325	0.999721
ENSG00000271254		209.749	0.226307	0.108768	2.08064	0.0374672	0.999721
ENSG00000167774		11.0154	0.96301	0.462918	2.08031	0.0374975	0.999721
ENSG00000105479	CCDC114	23.1412	0.419214	0.201534	2.08012	0.0375144	0.999721
ENSG00000076984	MAP2K7	1054.77	0.255527	0.122848	2.08003	0.0375229	0.999721
ENSG00000133812	SBF2	461.335	0.371442	0.178675	2.07887	0.0376297	0.999721
ENSG00000166529	ZSCAN21	107.268	0.149288	0.0718218	2.07858	0.0376556	0.999721
ENSG00000149531	FRG1BP	53.6818	0.305383	0.147024	2.0771	0.0377921	0.999721
ENSG00000167680	SEMA6B	52.239	-0.591283	0.284907	-2.07535	0.0379538	0.999721
ENSG00000188878	FBF1	221.052	0.244262	0.117727	2.07481	0.0380043	0.999721
ENSG00000197959	DNM3	47.0943	0.468137	0.225649	2.07462	0.0380218	0.999721
ENSG00000167555	ZNF528	244.802	0.275508	0.132899	2.07306	0.0381663	0.999721
ENSG00000176092	CRYBG2	19.1285	-0.709202	0.342469	-2.07085	0.038373	0.999721
ENSG00000102362	SYTL4	43.6775	0.388143	0.18748	2.07031	0.038423	0.999721
ENSG00000206455	TCF19	48.546	-1.37243	0.663533	-2.06837	0.038605	0.999721
ENSG00000119865	CNRIP1	31.6015	0.406511	0.196538	2.06836	0.0386063	0.999721
ENSG00000164758	MED30	205.133	-0.147807	0.0715044	-2.0671	0.0387245	0.999721
ENSG00000147050	KDM6A	913.77	-0.239394	0.115989	-2.06393	0.0390243	0.999721
ENSG00000136237	RAPGEF5	36.9567	0.488748	0.23712	2.06119	0.0392852	0.999721
ENSG00000050405	LIMA1	165.084	0.18679	0.0906576	2.06039	0.0393617	0.999721
ENSG00000198034	RPS4X	14921.5	-0.164714	0.0799565	-2.06004	0.0393948	0.999721
ENSG00000166133	RPUSD2	104.939	0.224099	0.108793	2.05986	0.039412	0.999721
ENSG00000137198	GMPR	4526.36	0.41781	0.202986	2.05832	0.039559	0.999721
ENSG00000113621	TXNDC15	319.823	-0.178341	0.086686	-2.05732	0.039655	0.999721
ENSG00000172889	EGFL7	72.0945	0.415552	0.202034	2.05684	0.0397018	0.999721
ENSG00000244486	SCARF2	12.7147	0.496875	0.242051	2.05277	0.0400949	0.999721
ENSG00000205609	EIF3CL	242.243	-1.02881	0.502012	-2.04938	0.040425	0.999721
ENSG00000230341	PPP1R18	111.134	-1.79513	0.881224	-2.03709	0.0416414	0.999721
ENSG00000184489	PTP4A3	17.3161	-0.711781	0.349556	-2.03624	0.041726	0.999721
ENSG00000063854	HAGH	3476.16	0.365816	0.179781	2.03479	0.0418723	0.999721
ENSG00000187688	TRPV2	1074.92	0.202861	0.0997166	2.03438	0.0419134	0.999721
ENSG00000171522	PTGER4	1206.69	-0.217847	0.107145	-2.03319	0.0420331	0.999721
ENSG00000138640	FAM13A	360.748	-0.236586	0.116385	-2.03278	0.0420745	0.999721
ENSG00000248905	FMN1	154.203	0.552958	0.272064	2.03245	0.042108	0.999721
ENSG00000275793	RIMBP3	39.6794	-0.263841	0.129877	-2.03147	0.0422071	0.999721
ENSG00000134108	ARL8B	1394.55	-0.17363	0.0854746	-2.03137	0.0422175	0.999721
ENSG00000100568	VTI1B	2258.37	0.308081	0.151686	2.03104	0.0422508	0.999721
ENSG00000112425	EPM2A	145.284	0.239704	0.118628	2.02064	0.0433171	0.999721
ENSG00000262788	UTP4	83.1713	0.606603	0.300266	2.02022	0.043361	0.999721
ENSG00000240429	LRRFIP1P1	12.3342	0.353992	0.175316	2.01917	0.0434696	0.999721
ENSG00000112053	SLC26A8	54.4013	-0.513628	0.25459	-2.01747	0.0436461	0.999721
ENSG00000183570	PCBP3	43.7643	-0.258088	0.128109	-2.0146	0.0439465	0.999721
ENSG00000170989	S1PR1	1597.95	-0.163229	0.0810278	-2.01448	0.0439593	0.999721
ENSG00000275962	VSTM1	27.2835	-0.616602	0.306137	-2.01414	0.0439951	0.999721
ENSG00000157353	FUK	299.498	0.23462	0.116528	2.01342	0.044071	0.999721
ENSG00000248405	PRR5-ARHGAP8	19.8655	0.614363	0.305471	2.0112	0.0443043	0.999721
ENSG00000204084	INPP5B	618.403	0.166179	0.0826996	2.00943	0.044492	0.999721
ENSG00000211793	TRAV9-2	44.0836	-0.275508	0.137118	-2.00928	0.0445071	0.999721
ENSG00000156026	MCU	348.773	-0.204701	0.101959	-2.00767	0.044678	0.999721
ENSG00000236438	FAM157A	741.583	0.434141	0.216314	2.007	0.0447501	0.999721
ENSG00000108423	TUBD1	125.227	-0.214996	0.107227	-2.00506	0.0449562	0.999721
ENSG00000070770	CSNK2A2	781.7	-0.093692	0.046756	-2.00385	0.0450861	0.999721
ENSG00000102554	KLF5	151.079	-0.295568	0.147792	-1.99989	0.0455123	0.999721
ENSG00000257017	HP	1431.91	-0.456577	0.228597	-1.9973	0.0457924	0.999721
ENSG00000228463		121.58	0.244087	0.122334	1.99524	0.0460164	0.999721
ENSG00000167081	PBX3	192.206	-0.161489	0.0809497	-1.99493	0.0460509	0.999721
ENSG00000113070	HBEGF	330.7	-0.493985	0.247706	-1.99424	0.0461263	0.999721
ENSG00000197763	TXNRD3	52.7921	0.267516	0.134313	1.99173	0.0464009	0.999721
ENSG00000198727	MT-CYB	17253.2	-0.227869	0.114411	-1.99167	0.0464075	0.999721
ENSG00000087086	FTL	37698	0.257425	0.129258	1.99155	0.0464204	0.999721
ENSG00000130713	EXOSC2	316.276	0.207876	0.104434	1.9905	0.0465356	0.999721
ENSG00000070214	SLC44A1	829.039	-0.204945	0.102972	-1.99029	0.0465586	0.999721
ENSG00000142168	SOD1	2496.35	0.258556	0.129935	1.98988	0.0466037	0.999721
ENSG00000181035	SLC25A42	375.491	0.213013	0.107069	1.98949	0.0466473	0.999721
ENSG00000147454	SLC25A37	39693.5	0.389355	0.195876	1.98776	0.0468381	0.999721
ENSG00000063761	ADCK1	108.656	0.189052	0.0951243	1.98742	0.0468759	0.999721
ENSG00000273875	TARM1	20.0274	-0.715117	0.360007	-1.9864	0.0469895	0.999721
ENSG00000139899	CBLN3	62.8536	0.411701	0.207384	1.98521	0.0471207	0.999721
ENSG00000120694	HSPH1	1332.57	-0.228325	0.11514	-1.98302	0.0473649	0.999721
ENSG00000105755	ETHE1	359.636	-0.309495	0.156099	-1.98269	0.0474025	0.999721
ENSG00000139291	TMEM19	432.75	0.183596	0.0926154	1.98235	0.04744	0.999721
ENSG00000130175	PRKCSH	2100.42	-0.116656	0.0588753	-1.98141	0.0475453	0.999721
ENSG00000163521	GLB1L	44.8956	0.286254	0.14459	1.97976	0.0477306	0.999721
ENSG00000136098	NEK3	93.0641	0.316086	0.159792	1.97811	0.047916	0.999721
ENSG00000119684	MLH3	237.292	0.160068	0.0809528	1.9773	0.0480079	0.999721
ENSG00000170298	LGALS9B	36.1323	0.438454	0.22182	1.97662	0.0480846	0.999721
ENSG00000100441	KHNYN	2267.35	0.193308	0.0978727	1.97509	0.0482578	0.999721
ENSG00000101194	SLC17A9	348.657	0.241147	0.122159	1.97404	0.0483769	0.999721
ENSG00000118690	ARMC2	85.7295	-0.195691	0.0991474	-1.97374	0.0484118	0.999721
ENSG00000120254	MTHFD1L	188.656	0.195735	0.0992386	1.97237	0.0485674	0.999721
ENSG00000170365	SMAD1	72.8392	0.309622	0.15715	1.97023	0.048812	0.999721
ENSG00000145632	PLK2	108.56	-0.376662	0.19121	-1.96989	0.0488509	0.999721
ENSG00000107014	RLN2	11.2875	-0.388719	0.19735	-1.96969	0.0488735	0.999721
ENSG00000153944	MSI2	1161.75	0.246571	0.125245	1.96872	0.0489858	0.999721
ENSG00000108474	PIGL	217.643	0.240266	0.122161	1.96679	0.0492074	0.999721
ENSG00000184497	TMEM255B	33.2833	0.52402	0.266473	1.9665	0.0492409	0.999721
ENSG00000100294	MCAT	59.8059	0.220487	0.112229	1.96462	0.0494582	0.999721
ENSG00000175787	ZNF169	97.935	0.28077	0.142966	1.96389	0.0495431	0.999721
ENSG00000159346	ADIPOR1	26793.6	0.407525	0.207666	1.9624	0.0497159	0.999721
ENSG00000198692	EIF1AY	3566.75	1.09853	0.56024	1.96082	0.0498996	0.999721
ENSG00000164346	NSA2	1538.89	-0.136729	0.0697387	-1.96059	0.0499273	0.999721
ENSG00000013306	SLC25A39	35012	0.39759	0.202872	1.9598	0.0500187	0.999721
ENSG00000160131	VMA21	476.645	-0.180664	0.0922976	-1.95741	0.0502992	0.999721
ENSG00000134864	GGACT	64.9102	0.283766	0.145051	1.95632	0.0504272	0.999721
ENSG00000152433	ZNF547	50.8838	0.30222	0.154559	1.95537	0.0505394	0.999721
ENSG00000130962	PRRG1	12.3984	0.568723	0.29101	1.95431	0.0506647	0.999721
ENSG00000131174	COX7B	893.799	0.224621	0.114955	1.954	0.0507015	0.999721
ENSG00000072110	ACTN1	3154.37	-0.121663	0.0622963	-1.95297	0.0508234	0.999721
ENSG00000145012	LPP	642.881	-0.352946	0.180828	-1.95184	0.0509574	0.999721
ENSG00000127533	F2RL3	26.1153	0.400146	0.205189	1.95014	0.0511594	0.999721
ENSG00000040487	PQLC2	83.7455	0.218394	0.112009	1.94978	0.051202	0.999721
ENSG00000157259	GATAD1	464.329	0.161585	0.0829694	1.94752	0.0514724	0.999721
ENSG00000168397	ATG4B	948.839	0.147442	0.075756	1.94627	0.0516225	0.999721
ENSG00000263874	LINC00672	72.5828	0.197379	0.101422	1.94611	0.0516416	0.999721
ENSG00000114374	USP9Y	379.21	1.18075	0.608028	1.94194	0.0521449	0.999721
ENSG00000164221	CCDC112	163.321	-0.237983	0.122579	-1.94146	0.052202	0.999721
ENSG00000159239		13.8936	0.435684	0.22442	1.94138	0.0522122	0.999721
ENSG00000188921	HACD4	1723	-0.14562	0.0750204	-1.94107	0.0522493	0.999721
ENSG00000136383	ALPK3	13.4084	-0.609758	0.314217	-1.94056	0.0523112	0.999721
ENSG00000106299	WASL	141.35	-0.151047	0.0778612	-1.93996	0.0523849	0.999721
ENSG00000173991	TCAP	37.0815	0.367417	0.189407	1.93983	0.0524001	0.999721
ENSG00000157168	NRG1	97.3365	-0.497775	0.256683	-1.93926	0.0524701	0.999721
ENSG00000276802	HERC2	278.86	-0.279265	0.144039	-1.93882	0.0525234	0.999721
ENSG00000142192	APP	1617.39	-0.183741	0.0947814	-1.93858	0.052553	0.999721
ENSG00000275571	TTC34	17.8503	0.385489	0.19888	1.9383	0.0525863	0.999721
ENSG00000187627	RGPD1	75.169	-0.271894	0.140425	-1.93622	0.0528404	0.999721
ENSG00000135211	TMEM60	140.605	-0.229598	0.118648	-1.93511	0.0529764	0.999721
ENSG00000005189	REXO5	68.8064	0.329927	0.170506	1.93499	0.0529911	0.999721
ENSG00000088387	DOCK9	725.821	0.232039	0.119951	1.93445	0.0530577	0.999721
ENSG00000178297	TMPRSS9	91.029	0.528041	0.273021	1.93407	0.0531047	0.999721
ENSG00000176083	ZNF683	50.7431	-0.315699	0.163271	-1.93359	0.0531631	0.999721
ENSG00000204463	BAG6	1420.96	0.737473	0.381466	1.93326	0.053204	0.999721
ENSG00000146426	TIAM2	36.5606	-0.242624	0.125593	-1.93182	0.0533813	0.999721
ENSG00000170631	ZNF16	78.8764	0.196822	0.101996	1.9297	0.0536436	0.999721
ENSG00000137207	YIPF3	1013.75	0.126288	0.0654786	1.92868	0.0537702	0.999721
ENSG00000036530	CYP46A1	27.8904	-0.388432	0.201625	-1.92651	0.0540408	0.999721
ENSG00000141447	OSBPL1A	120.32	-0.236598	0.122853	-1.92586	0.0541214	0.999721
ENSG00000103316	CRYM	9.56136	0.42092	0.218566	1.92583	0.0541259	0.999721
ENSG00000165775	FUNDC2	932.32	0.235593	0.122349	1.92558	0.054157	0.999721
ENSG00000127452	FBXL12	199.15	0.150825	0.07838	1.92428	0.0543197	0.999721
ENSG00000181790	ADGRB1	25.584	0.391359	0.203516	1.92299	0.0544814	0.999721
ENSG00000116455	WDR77	546.896	0.136856	0.0711746	1.92283	0.054502	0.999721
ENSG00000240505	TNFRSF13B	22.0216	0.370481	0.192698	1.9226	0.0545301	0.999721
ENSG00000140939	NOL3	34.8044	0.339285	0.176566	1.92158	0.0546587	0.999721
ENSG00000276644	DACH1	122.962	-0.298332	0.155523	-1.91825	0.0550795	0.999721
ENSG00000159915	ZNF233	37.8288	-0.240503	0.125405	-1.91781	0.0551354	0.999721
ENSG00000196565	HBG2	108855	0.528718	0.275752	1.91737	0.0551909	0.999721
ENSG00000277909	SPC25	14.8951	-0.56481	0.294589	-1.91728	0.0552024	0.999721
ENSG00000157657	ZNF618	51.9807	0.201577	0.105184	1.91643	0.0553107	0.999721
ENSG00000148655	LRMDA	54.3742	-0.40317	0.210394	-1.91626	0.0553317	0.999721
ENSG00000099889	ARVCF	106.523	0.290098	0.151399	1.91612	0.0553504	0.999721
ENSG00000261040	WFDC21P	12.7362	0.454638	0.237412	1.91497	0.0554965	0.999721
ENSG00000152795	HNRNPDL	5205.83	0.0772423	0.0403372	1.91491	0.0555037	0.999721
ENSG00000196369	SRGAP2B	343.225	0.291056	0.152159	1.91284	0.0557682	0.999721
ENSG00000106246	PTCD1	122.19	0.310177	0.162207	1.91223	0.0558473	0.999721
ENSG00000203780	FANK1	25.5043	0.56069	0.293358	1.91128	0.0559687	0.999721
ENSG00000264364	DYNLL2	1073.63	0.0881179	0.0461066	1.91118	0.0559818	0.999721
ENSG00000163536	SERPINI1	488.339	0.376208	0.196884	1.91081	0.0560296	0.999721
ENSG00000213366	GSTM2	674.845	0.213615	0.111895	1.90908	0.0562523	0.999721
ENSG00000189136	UBE2Q2P1	13.5606	0.436533	0.228743	1.9084	0.0563401	0.999721
ENSG00000171860	C3AR1	605.183	-0.28794	0.150919	-1.90791	0.0564025	0.999721
ENSG00000185905	C16orf54	1407.43	-0.139221	0.0730044	-1.90702	0.0565177	0.999721
ENSG00000086589	RBM22	953.968	-0.0772194	0.0405392	-1.90481	0.0568048	0.999721
ENSG00000121236	TRIM6	14.1207	0.388826	0.204153	1.90458	0.0568344	0.999721
ENSG00000133943	DGLUCY	634.958	0.114627	0.060246	1.90264	0.057087	0.999721
ENSG00000110448	CD5	1654.62	-0.165371	0.086932	-1.9023	0.0571314	0.999721
ENSG00000025039	RRAGD	284.979	-0.272895	0.14349	-1.90184	0.0571924	0.999721
ENSG00000171067	C11orf24	188.719	0.202658	0.106603	1.90106	0.0572942	0.999721
ENSG00000117016	RIMS3	83.6422	0.205235	0.107991	1.90048	0.0573697	0.999721
ENSG00000267640		43.5532	0.677384	0.356528	1.89995	0.05744	0.999721
ENSG00000198829	SUCNR1	51.0005	-0.543029	0.28595	-1.89904	0.0575596	0.999721
ENSG00000180354	MTURN	980.202	0.202011	0.106394	1.8987	0.0576034	0.999721
ENSG00000128891	CCDC32	297.89	-0.200961	0.105898	-1.89769	0.0577365	0.999721
ENSG00000017797	RALBP1	2315.65	0.223772	0.118047	1.89562	0.0580104	0.999721
ENSG00000091844	RGS17	13.0479	-0.308716	0.163088	-1.89294	0.0583656	0.999721
ENSG00000073792	IGF2BP2	2078.89	0.384723	0.203267	1.89269	0.0583986	0.999721
ENSG00000103044	HAS3	18.8887	0.351315	0.185752	1.89131	0.0585828	0.999721
ENSG00000142856	ITGB3BP	132.454	-0.145173	0.0767731	-1.89093	0.0586337	0.999721
ENSG00000023608	SNAPC1	131.64	-0.206123	0.109009	-1.89088	0.0586408	0.999721
ENSG00000167702	KIFC2	445.497	0.230666	0.122132	1.88866	0.0589368	0.999721
ENSG00000171097	KYAT1	116.197	0.273906	0.145053	1.88832	0.058983	0.999721
ENSG00000273850	PPP2R3B	118.329	0.267524	0.141791	1.88675	0.0591945	0.999721
ENSG00000284931		4.17955e+06	0.588889	0.312338	1.88542	0.0593731	0.999721
ENSG00000109265	KIAA1211	29.5559	0.499312	0.264942	1.88461	0.0594831	0.999721
ENSG00000108448	TRIM16L	26.3517	0.237445	0.126163	1.88204	0.05983	0.999721
ENSG00000231245	C1DP1	29.3757	1.05651	0.562	1.87991	0.0601199	0.999721
ENSG00000104714	ERICH1	562.031	0.165772	0.0882824	1.87775	0.0604154	0.999721
ENSG00000137563	GGH	64.1076	-0.344837	0.183664	-1.87755	0.0604434	0.999721
ENSG00000119899	SLC17A5	202.522	-0.203796	0.108568	-1.87712	0.0605011	0.999721
ENSG00000239839	DEFA3	8096.53	-0.746408	0.397842	-1.87614	0.060636	0.999721
ENSG00000158887	MPZ	32.4325	0.279086	0.148756	1.87613	0.0606371	0.999721
ENSG00000198146	ZNF770	1004.45	-0.176472	0.0940815	-1.87573	0.0606917	0.999721
ENSG00000102575	ACP5	560.513	0.245488	0.130957	1.87456	0.0608533	0.999721
ENSG00000105708	ZNF14	108.936	-0.129218	0.0689445	-1.87424	0.0608975	0.999721
ENSG00000197471	SPN	2591.7	-0.120105	0.0640855	-1.87413	0.0609125	0.999721
ENSG00000172232	AZU1	689.782	-0.627898	0.335159	-1.87343	0.0610087	0.999721
ENSG00000160145	KALRN	39.9186	0.272295	0.14535	1.87337	0.0610174	0.999721
ENSG00000183397	C19orf71	17.953	0.392019	0.209308	1.87293	0.0610784	0.999721
ENSG00000117640	MTFR1L	541.156	0.102814	0.0548956	1.8729	0.0610819	0.999721
ENSG00000122641	INHBA	60.8373	-0.436571	0.23316	-1.87241	0.0611505	0.999721
ENSG00000159214	CCDC24	31.6248	0.373723	0.199718	1.87125	0.0613099	0.999721
ENSG00000129484	PARP2	131.472	0.165715	0.0885931	1.87051	0.0614126	0.999721
ENSG00000156735	BAG4	211.023	-0.172979	0.092496	-1.87012	0.0614672	0.999721
ENSG00000278243	TSTA3	34.0303	-0.515081	0.275471	-1.86982	0.0615086	0.999721
ENSG00000042317	SPATA7	42.6213	-0.461962	0.247116	-1.86942	0.0615651	0.999721
ENSG00000237599	TAP2	320.55	1.28078	0.685416	1.86862	0.0616762	0.999721
ENSG00000136573	BLK	408.648	0.234553	0.125548	1.86823	0.0617299	0.999721
ENSG00000008513	ST3GAL1	3622.19	0.23421	0.12552	1.86591	0.0620534	0.999721
ENSG00000157570	TSPAN18	220.142	-0.230111	0.123327	-1.86586	0.062061	0.999721
ENSG00000158161	EYA3	315.374	0.166683	0.0893338	1.86585	0.0620628	0.999721
ENSG00000107521	HPS1	4363.66	0.337039	0.180705	1.86513	0.0621635	0.999721
ENSG00000125846	ZNF133	107.519	0.155898	0.0836255	1.86424	0.0622876	0.999721
ENSG00000127191	TRAF2	176.219	0.255895	0.137515	1.86085	0.0627652	0.999721
ENSG00000167291	TBC1D16	73.8402	0.344814	0.185304	1.8608	0.0627719	0.999721
ENSG00000119915	ELOVL3	9.61181	-0.53151	0.285963	-1.85867	0.0630739	0.999721
ENSG00000164823	OSGIN2	378.06	-0.210727	0.113424	-1.85787	0.063187	0.999721
ENSG00000108819	PPP1R9B	2748.9	0.154878	0.0833799	1.8575	0.0632401	0.999721
ENSG00000185432	METTL7A	1684.5	0.2012	0.108333	1.85725	0.0632759	0.999721
ENSG00000007516	BAIAP3	178.528	0.330044	0.177795	1.85632	0.0634084	0.999721
ENSG00000009830	POMT2	112.623	0.265964	0.14329	1.85612	0.0634369	0.999721
ENSG00000130529	TRPM4	29.8984	-0.266936	0.143859	-1.85555	0.0635183	0.999721
ENSG00000106624	AEBP1	397.854	0.178991	0.0964737	1.85533	0.0635491	0.999721
ENSG00000102837	OLFM4	3848.43	-0.547715	0.295292	-1.85483	0.0636207	0.999721
ENSG00000170325	PRDM10	192.068	0.224188	0.120985	1.85302	0.0638793	0.999721
ENSG00000254681	PKD1P5	244.794	-0.52239	0.281915	-1.853	0.0638817	0.999721
ENSG00000109189	USP46	108.836	0.204509	0.110438	1.8518	0.0640541	0.999721
ENSG00000133315	MACROD1	26.0419	0.294847	0.159236	1.85164	0.0640778	0.999721
ENSG00000104903	LYL1	2130.02	0.276432	0.149305	1.85147	0.0641025	0.999721
ENSG00000244274	DBNDD2	79.2192	-0.31143	0.168297	-1.85048	0.0642447	0.999721
ENSG00000120278	PLEKHG1	297.028	0.282196	0.152546	1.84991	0.0643269	0.999721
ENSG00000148358	GPR107	812.692	0.285149	0.15423	1.84886	0.0644782	0.999721
ENSG00000115602	IL1RL1	44.8466	0.386877	0.209265	1.84875	0.0644946	0.999721
ENSG00000251201	TMED7-TICAM2	88.2036	0.49609	0.268466	1.84787	0.0646212	0.999721
ENSG00000140941	MAP1LC3B	2924.03	0.251581	0.136221	1.84687	0.0647665	0.999721
ENSG00000105499	PLA2G4C	56.5642	0.445014	0.241265	1.84451	0.0651092	0.999721
ENSG00000211941	IGHV3-11	15.9095	0.420611	0.22811	1.84389	0.0651987	0.999721
ENSG00000124074	ENKD1	76.7116	0.33118	0.17962	1.84379	0.0652144	0.999721
ENSG00000165716	FAM69B	63.1482	0.329931	0.179045	1.84272	0.0653695	0.999721
ENSG00000157554	ERG	109.131	-0.367373	0.199389	-1.84249	0.0654029	0.999721
ENSG00000163993	S100P	401.882	-0.45354	0.24626	-1.84171	0.0655175	0.999721
ENSG00000144401	METTL21A	364.84	-0.141787	0.0770022	-1.84133	0.0655725	0.999721
ENSG00000188738	FSIP2	20.6933	0.361838	0.196539	1.84105	0.065614	0.999721
ENSG00000182973	CNOT10	534.618	-0.18274	0.0992625	-1.84097	0.0656257	0.999721
ENSG00000012048	BRCA1	157.563	-0.266313	0.144708	-1.84035	0.0657168	0.999721
ENSG00000165688	PMPCA	469.92	0.132478	0.0720163	1.83956	0.0658324	0.999721
ENSG00000164548	TRA2A	2093.65	-0.0985284	0.0535859	-1.8387	0.0659594	0.999721
ENSG00000234514	LST1	67.4557	-1.17112	0.637027	-1.83841	0.0660021	0.999721
ENSG00000277734	TRAC	3256.81	-0.19727	0.107511	-1.83489	0.0665218	0.999721
ENSG00000185252	ZNF74	190.705	0.110712	0.0603378	1.83487	0.0665251	0.999721
ENSG00000119280	C1orf198	134.347	0.192956	0.105261	1.83312	0.0667842	0.999721
ENSG00000131844	MCCC2	533.579	0.193576	0.105721	1.83101	0.0670996	0.999721
ENSG00000174705	SH3PXD2B	79.9056	0.464924	0.254134	1.82945	0.0673329	0.999721
ENSG00000136840	ST6GALNAC4	873.886	0.328564	0.179699	1.82841	0.0674884	0.999721
ENSG00000162676	GFI1	267.481	-0.213213	0.116679	-1.82735	0.0676469	0.999721
ENSG00000148180	GSN	1384.01	-0.241723	0.132353	-1.82635	0.0677971	0.999721
ENSG00000149485	FADS1	244.099	0.307339	0.168347	1.82562	0.0679074	0.999721
ENSG00000108175	ZMIZ1	1371.95	-0.18117	0.0992513	-1.82537	0.0679453	0.999721
ENSG00000188761	BCL2L15	79.4222	-0.400257	0.219297	-1.82519	0.0679729	0.999721
ENSG00000088986	DYNLL1	1458.85	0.257022	0.140888	1.82431	0.0681058	0.999721
ENSG00000175084	DES	38.0188	0.50562	0.277244	1.82374	0.0681913	0.999721
ENSG00000112149	CD83	168.371	-0.201905	0.110721	-1.82354	0.0682213	0.999721
ENSG00000165923	AGBL2	57.3635	0.303037	0.166223	1.82307	0.0682923	0.999721
ENSG00000105011	ASF1B	134.834	-0.273918	0.150372	-1.82161	0.0685148	0.999721
ENSG00000167491	GATAD2A	1255.2	0.122681	0.0673724	1.82094	0.0686165	0.999721
ENSG00000133805	AMPD3	1022.22	-0.167896	0.0922102	-1.82079	0.0686381	0.999721
ENSG00000188042	ARL4C	4465.38	-0.121171	0.0665796	-1.81994	0.0687687	0.999721
ENSG00000009844	VTA1	830.053	-0.111871	0.0614955	-1.81918	0.0688838	0.999721
ENSG00000139737	SLAIN1	195.366	-0.192573	0.105894	-1.81854	0.0689815	0.999721
ENSG00000132613	MTSS1L	112.55	0.317956	0.174855	1.8184	0.0690037	0.999721
ENSG00000277044	OPRL1	20.9053	0.788748	0.433914	1.81775	0.069102	0.999721
ENSG00000110844	PRPF40B	87.8836	0.329777	0.181641	1.81554	0.0694406	0.999721
ENSG00000110721	CHKA	159.374	0.250226	0.13783	1.81547	0.0694517	0.999721
ENSG00000273045	C2orf15	22.7938	0.367762	0.202587	1.81533	0.069473	0.999721
ENSG00000163069	SGCB	32.3676	-0.371836	0.204878	-1.81491	0.0695373	0.999721
ENSG00000101307	SIRPB1	1170.91	-0.270478	0.149069	-1.81445	0.0696092	0.999721
ENSG00000137337	MDC1	123.34	0.841069	0.464119	1.81218	0.0699577	0.999721
ENSG00000211786	TRAV8-2	51.0538	-0.214622	0.118534	-1.81063	0.0701975	0.999721
ENSG00000233327	USP32P2	135.526	0.341578	0.188718	1.80999	0.0702971	0.999721
ENSG00000090013	BLVRB	10468.6	0.294989	0.162986	1.8099	0.070311	0.999721
ENSG00000246705	H2AFJ	583.535	0.224006	0.123776	1.80977	0.0703318	0.999721
ENSG00000100461	RBM23	1257.38	-0.0921222	0.0509183	-1.80922	0.0704173	0.999721
ENSG00000238083	LRRC37A2	87.8957	0.361516	0.199835	1.80907	0.0704396	0.999721
ENSG00000256667	KLRA1P	41.9671	0.337879	0.186781	1.80896	0.0704571	0.999721
ENSG00000138756	BMP2K	2984.13	0.310846	0.171888	1.80842	0.0705415	0.999721
ENSG00000119414	PPP6C	1527.94	-0.103145	0.0570461	-1.80809	0.0705924	0.999721
ENSG00000198668	CALM1	5606.8	-0.109661	0.0606547	-1.80796	0.0706121	0.999721
ENSG00000197043	ANXA6	5417.05	-0.127763	0.070684	-1.80753	0.0706802	0.999721
ENSG00000123178	SPRYD7	69.6446	-0.273823	0.151517	-1.80721	0.0707302	0.999721
ENSG00000177548	RABEP2	239.42	0.165615	0.0916673	1.80669	0.0708099	0.999721
ENSG00000138768	USO1	1040.52	-0.115182	0.0637615	-1.80646	0.070847	0.999721
ENSG00000088888	MAVS	1360.33	0.111671	0.0618731	1.80484	0.0711003	0.999721
ENSG00000213064	SFT2D2	1118.21	0.155212	0.0860157	1.80446	0.071159	0.999721
ENSG00000101977	MCF2	20.4522	0.321082	0.177946	1.80438	0.0711718	0.999721
ENSG00000101138	CSTF1	343.756	-0.10862	0.0601995	-1.80433	0.071179	0.999721
ENSG00000066777	ARFGEF1	1661.09	-0.128733	0.0713854	-1.80335	0.0713328	0.999721
ENSG00000227794	RPS18	31.4108	0.415386	0.23051	1.80203	0.071541	0.999721
ENSG00000105248	YJU2	230.343	0.198916	0.110392	1.8019	0.0715617	0.999721
ENSG00000144749	LRIG1	419.695	-0.172672	0.0959179	-1.80021	0.0718279	0.999721
ENSG00000275584	LILRA6	40.5094	0.618594	0.344223	1.79707	0.0723238	0.999721
ENSG00000137200	CMTR1	1013.88	0.126811	0.0705876	1.79651	0.0724142	0.999721
ENSG00000146592	CREB5	642.971	-0.315228	0.175497	-1.7962	0.0724633	0.999721
ENSG00000166340	TPP1	4465.76	-0.156156	0.0869539	-1.79585	0.0725181	0.999721
ENSG00000120306	CYSTM1	1000.37	0.360571	0.200914	1.79465	0.0727097	0.999721
ENSG00000151718	WWC2	74.5473	-0.295255	0.164535	-1.79448	0.0727369	0.999721
ENSG00000203666	EFCAB2	93.4393	0.279571	0.15605	1.79155	0.0732055	0.999721
ENSG00000004455	AK2	1467.15	-0.0923346	0.0515441	-1.79137	0.0732336	0.999721
ENSG00000162928	PEX13	282.22	-0.123783	0.0691168	-1.79092	0.0733057	0.999721
ENSG00000166938	DIS3L	478.272	0.224768	0.125544	1.79035	0.0733978	0.999721
ENSG00000107317	PTGDS	181.473	-0.2735	0.152848	-1.78936	0.0735571	0.999721
ENSG00000204406	MBD5	368.92	0.253877	0.141991	1.78798	0.0737794	0.999721
ENSG00000118495	PLAGL1	266.786	-0.167972	0.0940812	-1.7854	0.0741969	0.999721
ENSG00000149262	INTS4	388.358	0.133565	0.0748433	1.7846	0.0743264	0.999721
ENSG00000224470	ATXN1L	794.623	0.198769	0.111544	1.78197	0.0747534	0.999721
ENSG00000122490	PQLC1	853.654	0.198758	0.111594	1.78108	0.0748988	0.999721
ENSG00000181135	ZNF707	152.541	0.212862	0.119537	1.78071	0.0749596	0.999721
ENSG00000146856	AGBL3	49.3745	0.292804	0.164508	1.77988	0.0750954	0.999721
ENSG00000049759	NEDD4L	470.518	0.336672	0.189205	1.77941	0.075173	0.999721
ENSG00000074054	CLASP1	1052.13	0.241146	0.135545	1.77908	0.0752267	0.999721
ENSG00000130413	STK33	51.105	0.278481	0.156533	1.77906	0.0752297	0.999721
ENSG00000134490	TMEM241	59.6502	0.270693	0.152196	1.77859	0.0753078	0.999721
ENSG00000174989	FBXW8	186.27	0.182266	0.1025	1.7782	0.075371	0.999721
ENSG00000179632	MAF1	3283.63	0.207808	0.116887	1.77785	0.0754284	0.999721
ENSG00000135900	MRPL44	304.615	-0.107352	0.0604065	-1.77717	0.0755405	0.999721
ENSG00000198948	MFAP3L	101.136	0.259058	0.145847	1.77623	0.0756943	0.999721
ENSG00000187325	TAF9B	156.993	-0.153219	0.0862625	-1.77619	0.0757017	0.999721
ENSG00000165731	RET	10.1324	-0.475944	0.26799	-1.77598	0.0757365	0.999721
ENSG00000171604	CXXC5	620.393	0.129462	0.072906	1.77573	0.0757769	0.999721
ENSG00000113108	APBB3	373.545	0.168095	0.0946864	1.77528	0.0758513	0.999721
ENSG00000164821	DEFA4	1001.72	-0.534748	0.301309	-1.77475	0.075939	0.999721
ENSG00000172336	POP7	142.42	0.185409	0.104562	1.77319	0.0761978	0.999721
ENSG00000137171	KLC4	216.843	0.144265	0.0814088	1.77211	0.0763761	0.999721
ENSG00000282771	TRBV18	28.1204	-0.495238	0.27947	-1.77206	0.0763842	0.999721
ENSG00000274891	TRAPPC12	71.1278	-0.36017	0.203487	-1.76999	0.076729	0.999721
ENSG00000179869	ABCA13	427.99	-0.416464	0.235497	-1.76845	0.0769854	0.999721
ENSG00000162551	ALPL	547.368	0.652042	0.368743	1.76829	0.0770132	0.999721
ENSG00000204514	ZNF814	173.659	0.171505	0.0970191	1.76774	0.0771039	0.999721
ENSG00000198925	ATG9A	1839.93	0.213424	0.120796	1.7668	0.0772609	0.999721
ENSG00000164330	EBF1	117.996	0.321497	0.181967	1.76678	0.0772643	0.999721
ENSG00000144535	DIS3L2	371.27	-0.152504	0.0863607	-1.76589	0.0774135	0.999721
ENSG00000106772	PRUNE2	56.3432	-0.494871	0.2803	-1.7655	0.0774795	0.999721
ENSG00000114742	WDR48	1091.91	0.175258	0.0992936	1.76505	0.0775562	0.999721
ENSG00000074356	NCBP3	1008.17	0.153877	0.0873119	1.76239	0.0780042	0.999721
ENSG00000128731	HERC2	761.037	0.285567	0.162134	1.7613	0.0781869	0.999721
ENSG00000187994	RINL	440.941	0.100162	0.0568891	1.76065	0.0782972	0.999721
ENSG00000149212	SESN3	4925.02	0.373593	0.212253	1.76013	0.0783854	0.999721
ENSG00000116717	GADD45A	798.035	0.267701	0.152315	1.75754	0.0788251	0.999721
ENSG00000118557	PMFBP1	19.5983	0.539497	0.306975	1.75746	0.0788389	0.999721
ENSG00000148154	UGCG	1825.43	-0.289068	0.164485	-1.75741	0.0788475	0.999721
ENSG00000131013	PPIL4	283.717	-0.124947	0.0711883	-1.75516	0.0792322	0.999721
ENSG00000176371	ZSCAN2	127.128	0.194448	0.110787	1.75516	0.0792328	0.999721
ENSG00000163362	INAVA	9.78846	-0.434689	0.247777	-1.75435	0.07937	0.999721
ENSG00000100083	GGA1	650.574	0.147552	0.0841449	1.75355	0.0795083	0.999721
ENSG00000214837	LINC01347	27.0554	0.367265	0.209502	1.75303	0.0795962	0.999721
ENSG00000282615	IGHJ5	50.4608	0.319654	0.18246	1.75191	0.0797898	0.999721
ENSG00000138669	PRKG2	19.6193	-0.440487	0.251441	-1.75185	0.0797997	0.999721
ENSG00000119185	ITGB1BP1	513.514	0.133845	0.0764306	1.75119	0.0799126	0.999721
ENSG00000112305	SMAP1	568.006	-0.0998987	0.0570753	-1.7503	0.0800673	0.999721
ENSG00000261377	PDCD6IPP2	26.5084	0.344941	0.197095	1.75013	0.0800963	0.999721
ENSG00000104381	GDAP1	90.2368	0.227043	0.129756	1.74976	0.0801596	0.999721
ENSG00000144048	DUSP11	403.847	-0.124448	0.0711266	-1.74967	0.0801744	0.999721
ENSG00000129932	DOHH	225.261	0.255937	0.146351	1.74879	0.080328	0.999721
ENSG00000022840	RNF10	26414	0.31727	0.181441	1.74861	0.0803583	0.999721
ENSG00000102230	PCYT1B	108.682	0.544111	0.311183	1.74852	0.0803732	0.999721
ENSG00000124098	FAM210B	13105.9	0.343291	0.19654	1.74667	0.0806943	0.999721
ENSG00000109906	ZBTB16	115.301	0.28218	0.161621	1.74594	0.0808214	0.999721
ENSG00000178057	NDUFAF3	415.567	0.175262	0.100446	1.74484	0.0810122	0.999721
ENSG00000157985	AGAP1	34.5711	-0.237485	0.136155	-1.74423	0.0811197	0.999721
ENSG00000142892	PIGK	589.826	-0.182821	0.104897	-1.74286	0.0813574	0.999721
ENSG00000250771		51.3847	0.427106	0.245158	1.74217	0.0814793	0.999721
ENSG00000160307	S100B	302.878	-0.345972	0.198715	-1.74104	0.0816758	0.999721
ENSG00000197558	SSPO	104.166	0.48314	0.277573	1.74058	0.0817565	0.999721
ENSG00000197121	PGAP1	109.463	0.413955	0.237878	1.7402	0.081824	0.999721
ENSG00000272602	ZNF595	95.8282	-0.321872	0.184986	-1.73998	0.0818631	0.999721
ENSG00000143321	HDGF	5030.72	0.20632	0.11876	1.7373	0.0823351	0.999721
ENSG00000166171	DPCD	340.247	0.311685	0.179523	1.73619	0.0825305	0.999721
ENSG00000096696	DSP	30.5466	-0.384476	0.221463	-1.73607	0.0825511	0.999721
ENSG00000141682	PMAIP1	295.677	0.237857	0.137032	1.73578	0.0826036	0.999721
ENSG00000183018	SPNS2	51.239	-0.43473	0.25053	-1.73524	0.0826983	0.999721
ENSG00000163421	PROK2	431.384	0.446804	0.257512	1.73508	0.0827264	0.999721
ENSG00000109084	TMEM97	57.9177	0.241148	0.139039	1.73439	0.082849	0.999721
ENSG00000163563	MNDA	8558.87	-0.229218	0.132162	-1.73437	0.0828528	0.999721
ENSG00000126107	HECTD3	680.839	0.136263	0.0785714	1.73426	0.0828717	0.999721
ENSG00000167671	UBXN6	5761.73	0.290833	0.167916	1.73201	0.0832711	0.999721
ENSG00000124356	STAMBP	502.792	-0.107369	0.0619955	-1.73188	0.0832946	0.999721
ENSG00000205084	TMEM231	10.9914	-0.36454	0.210524	-1.73159	0.083347	0.999721
ENSG00000075234	TTC38	569.485	0.233629	0.134994	1.73066	0.0835124	0.999721
ENSG00000234444	ZNF736	302.158	0.290049	0.167669	1.72989	0.0836508	0.999721
ENSG00000198046	ZNF667	106.818	0.308107	0.178122	1.72975	0.0836744	0.999721
ENSG00000141527	CARD14	19.4332	0.342364	0.19809	1.72833	0.0839288	0.999721
ENSG00000137700	SLC37A4	149.504	0.20838	0.120648	1.72718	0.0841362	0.999721
ENSG00000144848	ATG3	1137.46	-0.158019	0.0915158	-1.72669	0.0842237	0.999721
ENSG00000169288	MRPL1	206.956	-0.193901	0.112309	-1.7265	0.0842572	0.999721
ENSG00000274211	SOCS7	171.509	-0.347853	0.201489	-1.72642	0.0842726	0.999721
ENSG00000033800	PIAS1	1442.97	-0.136122	0.0788612	-1.72609	0.0843304	0.999721
ENSG00000163319	MRPS18C	207.444	-0.201296	0.116639	-1.72581	0.0843816	0.999721
ENSG00000140564	FURIN	5088.78	0.213578	0.123803	1.72515	0.0845013	0.999721
ENSG00000180998	GPR137C	16.5593	0.489439	0.283753	1.72488	0.0845498	0.999721
ENSG00000132670	PTPRA	1427.59	-0.109655	0.0635849	-1.72454	0.0846104	0.999721
ENSG00000090104	RGS1	313.826	-0.269884	0.156524	-1.72424	0.0846652	0.999721
ENSG00000132383	RPA1	1634.18	0.125022	0.0726011	1.72204	0.0850615	0.999721
ENSG00000197561	ELANE	1284.22	-0.571808	0.332343	-1.72054	0.0853352	0.999721
ENSG00000151575	TEX9	34.4462	-0.255979	0.149008	-1.71788	0.0858182	0.999721
ENSG00000141510	TP53	810.86	0.131321	0.0764449	1.71785	0.0858239	0.999721
ENSG00000144063	MALL	19.132	0.282447	0.164455	1.71747	0.0858929	0.999721
ENSG00000150403	TMCO3	621.622	0.207971	0.121117	1.7171	0.0859611	0.999721
ENSG00000186350	RXRA	3280.72	0.20491	0.119403	1.71612	0.08614	0.999721
ENSG00000108557	RAI1	516.339	0.187196	0.109114	1.7156	0.0862358	0.999721
ENSG00000204946	ZNF783	476.186	0.158066	0.0921999	1.71439	0.0864574	0.999721
ENSG00000198886	MT-ND4	28061.4	-0.209208	0.12213	-1.71299	0.086714	0.999721
ENSG00000068400	GRIPAP1	916.109	0.123555	0.0721806	1.71175	0.0869422	0.999721
ENSG00000102145	GATA1	808.78	0.33035	0.19303	1.71139	0.0870085	0.999721
ENSG00000127564	PKMYT1	68.2707	-0.316537	0.185096	-1.71012	0.0872437	0.999721
ENSG00000114923	SLC4A3	14.9021	0.322649	0.188684	1.71	0.0872656	0.999721
ENSG00000258472		37.4641	0.239161	0.139877	1.7098	0.0873033	0.999721
ENSG00000116161	CACYBP	786.27	-0.172556	0.10093	-1.70966	0.0873284	0.999721
ENSG00000166946	CCNDBP1	9686.32	0.297908	0.17431	1.70908	0.087437	0.999721
ENSG00000184206	GOLGA6L4	17.9984	0.33735	0.197408	1.7089	0.0874704	0.999721
ENSG00000068024	HDAC4	851.987	-0.216838	0.126899	-1.70875	0.0874981	0.999721
ENSG00000170469	SPATA24	19.0371	0.304939	0.178461	1.70872	0.0875035	0.999721
ENSG00000083544	TDRD3	296.767	-0.141286	0.0827272	-1.70786	0.0876621	0.999721
ENSG00000198336	MYL4	2702.08	0.329514	0.192975	1.70755	0.0877208	0.999721
ENSG00000148339	SLC25A25	210.024	0.102157	0.0598345	1.70733	0.0877611	0.999721
ENSG00000104738	MCM4	532.982	0.261696	0.153334	1.7067	0.0878779	0.999721
ENSG00000058056	USP13	143.727	0.246001	0.144271	1.70513	0.0881709	0.999721
ENSG00000173451	THAP2	142.373	-0.203629	0.11946	-1.70459	0.0882715	0.999721
ENSG00000172840	PDP2	86.8117	0.287845	0.168981	1.70342	0.0884896	0.999721
ENSG00000140022	STON2	56.9913	0.337933	0.198436	1.70298	0.0885719	0.999721
ENSG00000120675	DNAJC15	462.646	0.135137	0.0793674	1.70268	0.0886277	0.999721
ENSG00000079974	RABL2B	425.215	0.192727	0.11323	1.70208	0.0887402	0.999721
ENSG00000112299	VNN1	1115.77	-0.333696	0.196118	-1.70151	0.0888473	0.999721
ENSG00000116353	MECR	81.6842	0.168012	0.0987983	1.70055	0.0890266	0.999721
ENSG00000100387	RBX1	843.366	0.230641	0.135656	1.70019	0.0890961	0.999721
ENSG00000223459	TCAF1P1	16.9243	0.391909	0.230544	1.69993	0.0891438	0.999721
ENSG00000125430	HS3ST3B1	293.449	-0.17642	0.103798	-1.69965	0.0891965	0.999721
ENSG00000103047	TANGO6	217.525	0.168915	0.0993896	1.69953	0.0892201	0.999721
ENSG00000180423	HARBI1	66.03	0.236244	0.139022	1.69933	0.0892573	0.999721
ENSG00000147853	AK3	458.983	-0.130099	0.0765681	-1.69912	0.0892957	0.999721
ENSG00000134531	EMP1	20.0329	0.429625	0.252919	1.69867	0.0893819	0.999721
ENSG00000178567	EPM2AIP1	698.432	0.183691	0.108199	1.69772	0.0895605	0.999721
ENSG00000070756	PABPC1	29856.7	-0.142113	0.0837515	-1.69684	0.0897277	0.999721
ENSG00000163923	RPL39L	17.1528	-0.305127	0.179846	-1.6966	0.0897725	0.999721
ENSG00000105472	CLEC11A	112.131	-0.345795	0.203831	-1.69648	0.0897956	0.999721
ENSG00000066382	MPPED2	17.29	0.455885	0.269173	1.69365	0.090331	0.999721
ENSG00000272670	DOC2B	34.0548	-0.583779	0.344718	-1.6935	0.090361	0.999721
ENSG00000172771	EFCAB12	18.4735	0.336516	0.198874	1.69211	0.090625	0.999721
ENSG00000135046	ANXA1	8915.52	-0.157692	0.0932033	-1.69191	0.0906624	0.999721
ENSG00000099785	43161	1205.57	0.202836	0.119894	1.69179	0.0906869	0.999721
ENSG00000136003	ISCU	2571.76	0.219154	0.129543	1.69175	0.0906936	0.999721
ENSG00000141385	AFG3L2	580.45	0.0966681	0.057152	1.69142	0.0907561	0.999721
ENSG00000255163	HSPE1P18	17.4709	0.37857	0.223916	1.69068	0.0908981	0.999721
ENSG00000198753	PLXNB3	27.4682	0.634291	0.375855	1.6876	0.091489	0.999721
ENSG00000173988	LRRC63	6.85563	-0.40807	0.24181	-1.68756	0.091495	0.999721
ENSG00000187134	AKR1C1	41.8921	0.332024	0.197022	1.68521	0.0919478	0.999721
ENSG00000187109	NAP1L1	6439.88	-0.120502	0.0715091	-1.68513	0.0919637	0.999721
ENSG00000053372	MRTO4	230.031	0.118049	0.0700751	1.68461	0.0920645	0.999721
ENSG00000135924	DNAJB2	1977.87	0.232379	0.137997	1.68395	0.0921917	0.999721
ENSG00000277111	PLEKHM1	22.7487	-0.321537	0.191129	-1.6823	0.0925102	0.999721
ENSG00000129245	FXR2	460.859	0.116847	0.0694574	1.68229	0.0925127	0.999721
ENSG00000178409	BEND3	55.6314	0.16679	0.0991619	1.68199	0.0925702	0.999721
ENSG00000135632	SMYD5	223.48	0.222678	0.132473	1.68093	0.0927765	0.999721
ENSG00000188158	NHS	51.5707	-0.403442	0.240035	-1.68076	0.0928092	0.999721
ENSG00000163374	YY1AP1	2254.47	0.187299	0.111452	1.68053	0.092854	0.999721
ENSG00000036828	CASR	9.08056	0.374846	0.223114	1.68006	0.092945	0.999721
ENSG00000196335	STK31	9.89057	0.385377	0.229427	1.67974	0.0930082	0.999721
ENSG00000159905	ZNF221	13.9788	0.406753	0.242165	1.67965	0.093025	0.999721
ENSG00000068097	HEATR6	309.839	0.213434	0.127093	1.67936	0.093082	0.999721
ENSG00000170891	CYTL1	34.3559	0.355977	0.212042	1.6788	0.0931907	0.999721
ENSG00000175166	PSMD2	2138.65	0.116974	0.0696948	1.67837	0.0932751	0.999721
ENSG00000104973	MED25	1881.23	0.217872	0.129834	1.67807	0.0933326	0.999721
ENSG00000171824	EXOSC10	850.715	0.138728	0.0826992	1.67749	0.0934458	0.999721
ENSG00000163159	VPS72	433.729	-0.196566	0.117187	-1.67737	0.093471	0.999721
ENSG00000138796	HADH	357.442	-0.131438	0.0783623	-1.67731	0.0934815	0.999721
ENSG00000106012	IQCE	245.279	0.189933	0.113241	1.67724	0.0934958	0.999721
ENSG00000143819	EPHX1	82.197	-0.247282	0.147501	-1.67648	0.0936452	0.999721
ENSG00000089327	FXYD5	2370.76	-0.188523	0.112463	-1.67631	0.0936769	0.999721
ENSG00000006756	ARSD	278.185	-0.255055	0.152174	-1.67608	0.0937229	0.999721
ENSG00000205356	TECPR1	1225.43	0.151752	0.090634	1.67434	0.094064	0.999721
ENSG00000090372	STRN4	1025.55	0.109211	0.0652493	1.67375	0.0941801	0.999721
ENSG00000135801	TAF5L	353.591	0.13916	0.0831433	1.67373	0.0941834	0.999721
ENSG00000022277	RTF2	1471.39	0.101431	0.0606394	1.67269	0.0943881	0.999721
ENSG00000123700	KCNJ2	69.2528	0.360726	0.215688	1.67245	0.0944363	0.999721
ENSG00000131558	EXOC4	805.766	-0.137282	0.082096	-1.67222	0.0944819	0.999721
ENSG00000198933	TBKBP1	180.091	0.217496	0.130097	1.6718	0.0945634	0.999721
ENSG00000101605	MYOM1	107.972	-0.299155	0.178984	-1.67141	0.0946414	0.999721
ENSG00000086696	HSD17B2	18.8683	0.384747	0.230246	1.67102	0.0947173	0.999721
ENSG00000115806	GORASP2	867.325	-0.124477	0.0744959	-1.67093	0.0947364	0.999721
ENSG00000168038	ULK4	59.3822	0.226094	0.135326	1.67074	0.0947736	0.999721
ENSG00000163617	CCDC191	278.266	0.225514	0.134986	1.67065	0.09479	0.999721
ENSG00000259660	DNM1P47	24.4184	-0.593824	0.355485	-1.67046	0.0948281	0.999721
ENSG00000285250	MSRA	181.84	-0.304983	0.182578	-1.67043	0.0948346	0.999721
ENSG00000101882	NKAP	276.847	-0.134602	0.0805797	-1.67043	0.0948351	0.999721
ENSG00000136842	TMOD1	3111.41	0.32772	0.196201	1.67033	0.0948547	0.999721
ENSG00000135387	CAPRIN1	2144.85	-0.117919	0.0705976	-1.6703	0.0948609	0.999721
ENSG00000161654	LSM12	481.727	-0.124893	0.0748687	-1.66816	0.0952844	0.999721
ENSG00000101464	PIGU	127.19	-0.136635	0.0819381	-1.66754	0.0954074	0.999721
ENSG00000143753	DEGS1	827.653	-0.149935	0.0900052	-1.66585	0.095744	0.999721
ENSG00000183506	PI4KAP2	429.657	0.183595	0.110266	1.66501	0.09591	0.999721
ENSG00000284835	DEFA3	8208.54	-0.580582	0.348708	-1.66495	0.0959226	0.999721
ENSG00000171155	C1GALT1C1	262.386	-0.152368	0.0915364	-1.66456	0.0960007	0.999721
ENSG00000278565	CEACAM21	255.983	-0.144984	0.0871328	-1.66394	0.0961243	0.999721
ENSG00000035687	ADSS	1391.38	-0.142812	0.0858492	-1.66352	0.096208	0.999721
ENSG00000214954	LRRC69	17.449	0.307457	0.184951	1.66237	0.0964396	0.999721
ENSG00000124602	UNC5CL	47.7614	0.232706	0.140032	1.6618	0.0965529	0.999721
ENSG00000139160	ETFBKMT	34.122	0.320911	0.193162	1.66136	0.0966414	0.999721
ENSG00000211734	TRBV5-1	166.568	-0.210598	0.126776	-1.66118	0.0966778	0.999721
ENSG00000180304	OAZ2	2325.83	0.192157	0.115679	1.66113	0.0966875	0.999721
ENSG00000159761	C16orf86	52.1332	0.204723	0.123263	1.66087	0.0967401	0.999721
ENSG00000066926	FECH	16889.8	0.353067	0.212613	1.6606	0.0967931	0.999721
ENSG00000092094	OSGEP	665.432	0.148253	0.0892842	1.66046	0.0968214	0.999721
ENSG00000158856	DMTN	14960.2	0.336497	0.20269	1.66016	0.0968827	0.999721
ENSG00000284491	THSD8	17.8396	-0.477926	0.288385	-1.65725	0.0974683	0.999721
ENSG00000117091	CD48	3726.82	-0.138541	0.0836328	-1.65654	0.0976119	0.999721
ENSG00000126217	MCF2L	108.994	0.22863	0.138042	1.65624	0.0976731	0.999721
ENSG00000100206	DMC1	14.7617	0.437179	0.264024	1.65583	0.0977565	0.999721
ENSG00000260735		52.2864	0.468707	0.283105	1.65559	0.0978044	0.999721
ENSG00000120217	CD274	38.3492	-0.249473	0.150785	-1.6545	0.0980265	0.999721
ENSG00000205085	FAM71F2	15.4221	0.370929	0.22423	1.65423	0.09808	0.999721
ENSG00000058600	POLR3E	614.333	0.131153	0.079322	1.65343	0.0982438	0.999721
ENSG00000163625	WDFY3	822.036	0.340101	0.205712	1.65329	0.0982719	0.999721
ENSG00000114554	PLXNA1	168.141	0.226846	0.13724	1.65292	0.0983469	0.999721
ENSG00000232962	HLA-DOA	55.8812	0.759396	0.459722	1.65186	0.0985632	0.999721
ENSG00000101079	NDRG3	595.932	-0.103289	0.0625357	-1.65168	0.0986004	0.999721
ENSG00000023330	ALAS1	423.206	-0.184898	0.111962	-1.65143	0.0986505	0.999721
ENSG00000128245	YWHAH	1144.19	-0.175765	0.106456	-1.65106	0.0987266	0.999721
ENSG00000186642	PDE2A	98.5148	0.325073	0.196947	1.65056	0.098829	0.999721
ENSG00000145375	SPATA5	82.5936	-0.230901	0.139899	-1.65048	0.0988442	0.999721
ENSG00000100263	RHBDD3	100.428	0.167535	0.101545	1.64986	0.0989722	0.999721
ENSG00000110888	CAPRIN2	499.642	0.170125	0.103123	1.64973	0.0989989	0.999721
ENSG00000276163	LAIR1	163.359	-0.428295	0.259769	-1.64876	0.0991976	0.999721
ENSG00000187474	FPR3	10.2508	-0.424685	0.257635	-1.6484	0.0992715	0.999721
ENSG00000124207	CSE1L	749.377	-0.104507	0.0634205	-1.64784	0.0993861	0.999721
ENSG00000183311	TUBB	377.072	0.878252	0.532975	1.64783	0.0993876	0.999721
ENSG00000158828	PINK1	2488.18	0.268877	0.163334	1.64618	0.0997262	0.999721
ENSG00000228716	DHFR	697.34	-0.196024	0.11909	-1.64602	0.0997605	0.999721
ENSG00000140987	ZSCAN32	293.199	0.119936	0.0728754	1.64577	0.0998107	0.999721
ENSG00000102245	CD40LG	472.174	-0.166684	0.101322	-1.64509	0.0999503	0.999721
ENSG00000068308	OTUD5	1336.92	0.155568	0.0945811	1.64481	0.100008	0.999721
ENSG00000143373	ZNF687	405.086	0.142385	0.08659	1.64436	0.100101	0.999721
ENSG00000167123	CERCAM	33.9884	0.255998	0.155695	1.64423	0.10013	0.999721
ENSG00000132470	ITGB4	14.8888	0.523343	0.318298	1.64419	0.100137	0.999721
ENSG00000135424	ITGA7	31.0506	0.301985	0.183759	1.64338	0.100305	0.999721
ENSG00000134575	ACP2	179.386	-0.123111	0.0749324	-1.64295	0.100392	0.999721
ENSG00000176454	LPCAT4	296.158	0.149416	0.0909509	1.64282	0.100421	0.999721
ENSG00000211800	TRAV20	15.2656	-0.312494	0.19029	-1.6422	0.100548	0.999721
ENSG00000163468	CCT3	2228.86	-0.103467	0.0630274	-1.64161	0.10067	0.999721
ENSG00000151012	SLC7A11	11.9129	0.317495	0.193538	1.64048	0.100905	0.999721
ENSG00000188002		92.79	0.201208	0.12269	1.63997	0.101011	0.999721
ENSG00000157911	PEX10	110.67	0.173791	0.105987	1.63973	0.101061	0.999721
ENSG00000188636	RTL6	394.643	0.0876792	0.0534896	1.63918	0.101175	0.999721
ENSG00000176681	LRRC37A	19.9415	0.554509	0.338418	1.63853	0.101311	0.999721
ENSG00000179455	MKRN3	24.6548	0.438045	0.267385	1.63826	0.101368	0.999721
ENSG00000118777	ABCG2	439.191	0.326307	0.199329	1.63703	0.101625	0.999721
ENSG00000184292	TACSTD2	74.1826	-0.452761	0.276612	-1.63681	0.10167	0.999721
ENSG00000143774	GUK1	5781.72	0.249979	0.152793	1.63606	0.101827	0.999721
ENSG00000100918	REC8	240.009	0.202953	0.124065	1.63585	0.10187	0.999721
ENSG00000206505	HLA-A	750.06	-0.85676	0.52383	-1.63557	0.101929	0.999721
ENSG00000281763	DHX36	220.959	0.264372	0.161832	1.63362	0.102339	0.999721
ENSG00000154451	GBP5	797.685	0.165379	0.101278	1.63292	0.102487	0.999721
ENSG00000171132	PRKCE	177.509	0.146941	0.0900111	1.63248	0.102578	0.999721
ENSG00000008300	CELSR3	62.9657	0.281673	0.172578	1.63215	0.102649	0.999721
ENSG00000102967	DHODH	104.101	0.176037	0.107902	1.63144	0.102797	0.999721
ENSG00000140455	USP3	1264.97	-0.0765723	0.0469377	-1.63136	0.102815	0.999721
ENSG00000163519	TRAT1	1058.53	-0.199604	0.122362	-1.63126	0.102836	0.999721
ENSG00000004975	DVL2	371.666	0.12783	0.0783658	1.6312	0.102849	0.999721
ENSG00000136908	DPM2	1358.71	0.258961	0.158763	1.63111	0.102867	0.999721
ENSG00000154240	CEP112	14.0973	0.463192	0.283978	1.63108	0.102873	0.999721
ENSG00000178386	ZNF223	69.9146	0.268126	0.164441	1.63053	0.10299	0.999721
ENSG00000099804	CDC34	2989.96	0.279296	0.171346	1.63001	0.103099	0.999721
ENSG00000005381	MPO	4095.48	-0.45421	0.278655	-1.63001	0.1031	0.999721
ENSG00000066923	STAG3	140.875	0.169754	0.10427	1.62802	0.103521	0.999721
ENSG00000139044	B4GALNT3	70.1261	-0.389356	0.239198	-1.62776	0.103577	0.999721
ENSG00000151702	FLI1	2987.3	-0.10967	0.0673969	-1.62723	0.103688	0.999721
ENSG00000168936	TMEM129	421.208	0.144458	0.0887758	1.62722	0.103691	0.999721
ENSG00000215271	HOMEZ	191.663	-0.174775	0.107408	-1.62721	0.103693	0.999721
ENSG00000162714	ZNF496	486.076	0.151667	0.0932111	1.62714	0.103708	0.999721
ENSG00000100941	PNN	2016.37	0.187146	0.115045	1.62672	0.103796	0.999721
ENSG00000164162	ANAPC10	111.558	-0.154246	0.0948274	-1.6266	0.103823	0.999721
ENSG00000174137	FAM53A	19.0319	0.37435	0.230158	1.62649	0.103845	0.999721
ENSG00000167962	ZNF598	424.966	0.154508	0.095002	1.62637	0.103871	0.999721
ENSG00000166913	YWHAB	5925.18	-0.0892995	0.054922	-1.62593	0.103964	0.999721
ENSG00000131126	TEX101	27.9957	-0.419207	0.257845	-1.62581	0.10399	0.999721
ENSG00000269343	ZNF587B	125.719	0.154796	0.0952367	1.62538	0.104081	0.999721
ENSG00000188820	CALHM6	171.062	0.214653	0.132071	1.62529	0.104102	0.999721
ENSG00000282607	MGAM	300.722	0.563645	0.346827	1.62515	0.104131	0.999721
ENSG00000198840	MT-ND3	4233.83	-0.200171	0.123193	-1.62485	0.104194	0.999721
ENSG00000189269	DRICH1	15.6947	-0.420536	0.258873	-1.62449	0.104271	0.999721
ENSG00000118276	B4GALT6	92.1621	-0.248034	0.152693	-1.62439	0.104292	0.999721
ENSG00000117984	CTSD	5805.22	-0.21717	0.133704	-1.62426	0.10432	0.999721
ENSG00000196935	SRGAP1	21.9442	-0.300463	0.185026	-1.62389	0.104399	0.999721
ENSG00000103496	STX4	614.724	0.136977	0.0843532	1.62385	0.104407	0.999721
ENSG00000054690	PLEKHH1	11.5315	-0.363314	0.223759	-1.62369	0.104443	0.999721
ENSG00000197978	GOLGA6L9	50.3309	0.442208	0.27247	1.62296	0.104597	0.999721
ENSG00000152128	TMEM163	8.43428	0.304359	0.187649	1.62196	0.104812	0.999721
ENSG00000131944	FAAP24	30.0124	-0.249233	0.15375	-1.62103	0.105012	0.999721
ENSG00000111144	LTA4H	4570.25	-0.168958	0.104245	-1.62078	0.105065	0.999721
ENSG00000198830	HMGN2	4675.16	-0.194111	0.119764	-1.62077	0.105067	0.999721
ENSG00000214265		50.5227	-0.209938	0.129532	-1.62074	0.105074	0.999721
ENSG00000089057	SLC23A2	529.765	0.170995	0.105517	1.62054	0.105116	0.999721
ENSG00000169764	UGP2	1569.06	-0.132337	0.081685	-1.62009	0.105213	0.999721
ENSG00000211706	TRBV6-1	60.4605	-0.160843	0.0993546	-1.61888	0.105474	0.999721
ENSG00000160584	SIK3	1387.62	0.141465	0.0874152	1.61831	0.105596	0.999721
ENSG00000185022	MAFF	60.8643	0.260005	0.160766	1.61728	0.105817	0.999721
ENSG00000166526	ZNF3	299.193	0.11711	0.0724379	1.6167	0.105944	0.999721
ENSG00000060140	STYK1	44.1021	-0.33794	0.209049	-1.61656	0.105974	0.999721
ENSG00000178814	OPLAH	113.337	0.341722	0.211471	1.61593	0.10611	0.999721
ENSG00000167641	PPP1R14A	46.7154	0.279811	0.173162	1.61589	0.106118	0.999721
ENSG00000102738	MRPS31	353.156	-0.125039	0.077386	-1.61578	0.106141	0.999721
ENSG00000095139	ARCN1	1786.33	-0.0852555	0.0528125	-1.6143	0.106461	0.999721
ENSG00000111348	ARHGDIB	13259.7	-0.117807	0.0729801	-1.61423	0.106477	0.999721
ENSG00000126581	BECN1	1703.65	0.138048	0.0855339	1.61396	0.106536	0.999721
ENSG00000187742	SECISBP2	1401.67	0.183882	0.113936	1.61391	0.106547	0.999721
ENSG00000130165	ELOF1	1195.14	0.243704	0.151127	1.61258	0.106836	0.999721
ENSG00000204130	RUFY2	186.736	0.18073	0.11211	1.61208	0.106945	0.999721
ENSG00000198440	ZNF583	132.234	0.23809	0.147693	1.61206	0.106949	0.999721
ENSG00000115138	POMC	39.7324	0.281093	0.17444	1.6114	0.107092	0.999721
ENSG00000165698	SPACA9	42.0908	0.240142	0.149039	1.61126	0.107122	0.999721
ENSG00000107560	RAB11FIP2	492.572	0.256473	0.159201	1.61101	0.107178	0.999721
ENSG00000273793	DUSP8	31.921	-0.52128	0.323961	-1.60908	0.107598	0.999721
ENSG00000215193	PEX26	590.801	0.0796715	0.0495282	1.60861	0.107702	0.999721
ENSG00000100448	CTSG	807.946	-0.516618	0.321297	-1.60791	0.107854	0.999721
ENSG00000174628	IQCK	14.954	-0.366853	0.228257	-1.60719	0.108012	0.999721
ENSG00000197381	ADARB1	548.252	0.178355	0.111009	1.60668	0.108125	0.999721
ENSG00000018510	AGPS	886.059	-0.131473	0.081843	-1.60641	0.108184	0.999721
ENSG00000239887	C1orf226	12.8253	-0.455879	0.283801	-1.60634	0.1082	0.999721
ENSG00000168883	USP39	766.307	-0.086871	0.0541408	-1.60454	0.108596	0.999721
ENSG00000159374	M1AP	18.0764	-0.456893	0.284919	-1.60359	0.108805	0.999721
ENSG00000206172	HBA1	1.85775e+06	0.422501	0.263548	1.60313	0.108907	0.999721
ENSG00000174456	C12orf76	194.918	0.126329	0.0788097	1.60296	0.108943	0.999721
ENSG00000136802	LRRC8A	648.069	0.169443	0.10572	1.60274	0.108991	0.999721
ENSG00000122025	FLT3	204.535	0.307814	0.192127	1.60214	0.109125	0.999721
ENSG00000150867	PIP4K2A	8013.81	0.227329	0.141997	1.60094	0.10939	0.999721
ENSG00000107372	ZFAND5	4760.99	0.147407	0.0920816	1.60082	0.109416	0.999721
ENSG00000169016	E2F6	169.213	0.128734	0.0804478	1.60022	0.109551	0.999721
ENSG00000123358	NR4A1	346.592	-0.357599	0.223531	-1.59977	0.109649	0.999721
ENSG00000140479	PCSK6	62.4559	0.35432	0.221516	1.59952	0.109704	0.999721
ENSG00000148344	PTGES	18.9502	-0.372528	0.233012	-1.59875	0.109877	0.999721
ENSG00000214402	LCNL1	20.6096	0.410353	0.256689	1.59864	0.109901	0.999721
ENSG00000145431	PDGFC	96.5272	-0.392111	0.245308	-1.59844	0.109945	0.999721
ENSG00000260220	CCDC187	31.7677	0.273941	0.171397	1.59828	0.10998	0.999721
ENSG00000136819	C9orf78	5817.43	0.293859	0.183912	1.59782	0.110082	0.999721
ENSG00000182389	CACNB4	53.9546	-0.344591	0.215714	-1.59744	0.110167	0.999721
ENSG00000012660	ELOVL5	1976.98	-0.0957864	0.0599651	-1.59737	0.110183	0.999721
ENSG00000215883	CYB5RL	134.378	0.249194	0.156099	1.59639	0.110403	0.999721
ENSG00000148090	AUH	240.791	0.149005	0.0933484	1.59623	0.110438	0.999721
ENSG00000188372	ZP3	23.9384	-0.264711	0.165853	-1.59606	0.110475	0.999721
ENSG00000108828	VAT1	711.065	-0.162501	0.101835	-1.59573	0.110549	0.999721
ENSG00000177628	GBA	645.116	-0.186735	0.117048	-1.59537	0.110629	0.999721
ENSG00000139083	ETV6	605.391	-0.18496	0.115941	-1.5953	0.110646	0.999721
ENSG00000187838	PLSCR3	825.41	-0.140313	0.0879804	-1.59482	0.110752	0.999721
ENSG00000238105	GOLGA2P5	158.654	0.24051	0.150846	1.59441	0.110844	0.999721
ENSG00000167695	FAM57A	20.9094	-0.40476	0.253946	-1.59389	0.110962	0.999721
ENSG00000122224	LY9	730.319	-0.136662	0.0857858	-1.59307	0.111145	0.999721
ENSG00000088992	TESC	1936.51	0.280295	0.175964	1.59291	0.111181	0.999721
ENSG00000119946	CNNM1	12.8406	0.333366	0.209315	1.59265	0.111238	0.999721
ENSG00000165121		72.0357	0.227821	0.14305	1.5926	0.11125	0.999721
ENSG00000171570	RAB4B-EGLN2	32.5982	0.402315	0.252676	1.59221	0.111337	0.999721
ENSG00000149476	TKFC	287.842	0.160089	0.100563	1.59193	0.111401	0.999721
ENSG00000169860	P2RY1	109.77	0.221849	0.139361	1.5919	0.111407	0.999721
ENSG00000188542	DUSP28	102.658	0.201488	0.126581	1.59177	0.111436	0.999721
ENSG00000136273	HUS1	258.104	-0.141068	0.088629	-1.59167	0.111458	0.999721
ENSG00000113494	PRLR	47.1863	0.326877	0.205453	1.59101	0.111608	0.999721
ENSG00000176903	PNMA1	345.427	0.148035	0.0932053	1.58826	0.112227	0.999721
ENSG00000154920	EME1	16.2596	-0.298006	0.187658	-1.58802	0.112281	0.999721
ENSG00000147130	ZMYM3	587.887	0.114685	0.0722639	1.58703	0.112505	0.999721
ENSG00000174099	MSRB3	171.165	-0.376666	0.237396	-1.58666	0.112591	0.999721
ENSG00000013375	PGM3	446.934	-0.329234	0.207725	-1.58495	0.112978	0.999721
ENSG00000205531	NAP1L4	2032.65	0.188964	0.119236	1.58478	0.113016	0.999721
ENSG00000123908	AGO2	1876.27	0.219986	0.138839	1.58447	0.113086	0.999721
ENSG00000244731	C4A	428.723	0.573982	0.362265	1.58442	0.113098	0.999721
ENSG00000134198	TSPAN2	577.865	-0.235582	0.148702	-1.58425	0.113136	0.999721
ENSG00000162461	SLC25A34	31.9699	-0.283984	0.179286	-1.58397	0.113199	0.999721
ENSG00000120256	LRP11	37.0947	0.364193	0.229955	1.58376	0.113249	0.999721
ENSG00000197050	ZNF420	146.089	0.16864	0.106483	1.58373	0.113256	0.999721
ENSG00000165661	QSOX2	1117.76	0.242374	0.153101	1.5831	0.113399	0.999721
ENSG00000057608	GDI2	3939.83	-0.132106	0.0834503	-1.58305	0.11341	0.999721
ENSG00000110435	PDHX	235.013	-0.120192	0.0759341	-1.58285	0.113457	0.999721
ENSG00000145088	EAF2	187.801	-0.185184	0.1171	-1.58141	0.113784	0.999721
ENSG00000100413	POLR3H	330.907	0.0976818	0.0617877	1.58093	0.113895	0.999721
ENSG00000143416	SELENBP1	19706.2	0.292524	0.185101	1.58034	0.114028	0.999721
ENSG00000198088	NUP62CL	13.5287	-0.265565	0.168087	-1.57992	0.114124	0.999721
ENSG00000179010	MRFAP1	3490.33	0.1461	0.0924891	1.57965	0.114187	0.999721
ENSG00000216937	CCDC7	80.9886	0.223553	0.141589	1.57889	0.114361	0.999721
ENSG00000249437	NAIP	111.235	0.369257	0.234057	1.57764	0.114648	0.999721
ENSG00000156030	ELMSAN1	836.292	0.166198	0.105372	1.57725	0.114738	0.999721
ENSG00000110925	CSRNP2	287.941	-0.130917	0.083012	-1.57709	0.114776	0.999721
ENSG00000104408	EIF3E	7606.35	-0.112538	0.0714458	-1.57516	0.11522	0.999721
ENSG00000170571	EMB	4128.27	-0.235984	0.14983	-1.57501	0.115254	0.999721
ENSG00000112195	TREML2	436.611	0.177567	0.112783	1.57441	0.115393	0.999721
ENSG00000183048	SLC25A10	36.3424	-0.224732	0.142745	-1.57436	0.115404	0.999721
ENSG00000126861	OMG	11.1539	-0.351101	0.223013	-1.57435	0.115407	0.999721
ENSG00000132716	DCAF8	2903.21	0.162151	0.103009	1.57415	0.115453	0.999721
ENSG00000129295	LRRC6	23.4802	-0.456158	0.289795	-1.57407	0.115471	0.999721
ENSG00000123600	METTL8	197.957	0.161964	0.102902	1.57396	0.115497	0.999721
ENSG00000186648	CARMIL3	25.089	-0.425323	0.270334	-1.57332	0.115645	0.999721
ENSG00000225972	MTND1P23	105.771	0.783505	0.498037	1.57318	0.115676	0.999721
ENSG00000128218	VPREB3	134.461	0.235165	0.149495	1.57306	0.115705	0.999721
ENSG00000151692	RNF144A	655.733	-0.14491	0.092151	-1.57253	0.115827	0.999721
ENSG00000117133	RPF1	499.617	-0.0923126	0.0587045	-1.5725	0.115835	0.999721
ENSG00000151849	CENPJ	200.401	-0.179865	0.114552	-1.57017	0.116376	0.999721
ENSG00000176422	SPRYD4	123.437	0.13543	0.0863354	1.56864	0.116731	0.999721
ENSG00000109944	JHY	23.4235	0.201595	0.128521	1.56857	0.116748	0.999721
ENSG00000187147	RNF220	1090.14	0.077508	0.0494222	1.56828	0.116815	0.999721
ENSG00000010278	CD9	319.108	-0.245835	0.156767	-1.56815	0.116846	0.999721
ENSG00000089737	DDX24	845.174	-0.299625	0.191105	-1.56786	0.116914	0.999721
ENSG00000166169	POLL	981.88	0.194292	0.123923	1.56785	0.116915	0.999721
ENSG00000170542	SERPINB9	1327.66	-0.127718	0.0814749	-1.56757	0.116981	0.999721
ENSG00000196547	MAN2A2	3325.27	0.207337	0.132273	1.5675	0.116998	0.999721
ENSG00000102974	CTCF	1170.46	-0.0567177	0.0361947	-1.56702	0.117111	0.999721
ENSG00000272414	FAM47E-STBD1	90.2788	-0.387178	0.247171	-1.56644	0.117246	0.999721
ENSG00000157429	ZNF19	30.1982	0.250093	0.159658	1.56643	0.117249	0.999721
ENSG00000104133	SPG11	1840.15	0.138797	0.088617	1.56626	0.117288	0.999721
ENSG00000163803	PLB1	263.113	-0.239572	0.153055	-1.56527	0.117519	0.999721
ENSG00000072195	SPEG	153.214	0.232567	0.148584	1.56522	0.117532	0.999721
ENSG00000104833	TUBB4A	16.7647	0.272363	0.174021	1.56512	0.117555	0.999721
ENSG00000211817	TRAV38-2DV8	28.6781	-0.198894	0.127133	-1.56446	0.11771	0.999721
ENSG00000110442	COMMD9	502.221	-0.253061	0.161846	-1.5636	0.117912	0.999721
ENSG00000282752	CTDP1	57.1297	0.468315	0.299663	1.5628	0.118099	0.999721
ENSG00000163950	SLBP	681.608	-0.109548	0.0701228	-1.56224	0.118232	0.999721
ENSG00000124343	XG	34.1984	-0.563473	0.360796	-1.56175	0.118346	0.999721
ENSG00000154079	SDHAF4	62.0542	-0.178624	0.114375	-1.56174	0.118348	0.999721
ENSG00000196998	WDR45	1153.02	0.162224	0.103942	1.56073	0.118588	0.999721
ENSG00000183032	SLC25A21	34.8326	0.386049	0.247424	1.56028	0.118695	0.999721
ENSG00000131389	SLC6A6	1395.13	0.193928	0.124348	1.55956	0.118863	0.999721
ENSG00000126391	FRMD8	590.085	0.160446	0.102893	1.55935	0.118913	0.999721
ENSG00000162825	NBPF20	147.637	0.254594	0.16328	1.55925	0.118938	0.999721
ENSG00000079785	DDX1	885.475	-0.0666965	0.0427752	-1.55923	0.118941	0.999721
ENSG00000109062	SLC9A3R1	1786.84	-0.105723	0.0678361	-1.55851	0.119112	0.999721
ENSG00000186088	GSAP	905.504	0.187418	0.120349	1.55729	0.119402	0.999721
ENSG00000153561	RMND5A	3553.98	0.256307	0.164615	1.55701	0.119467	0.999721
ENSG00000179218	CALR	3885.69	-0.129749	0.0833431	-1.55681	0.119517	0.999721
ENSG00000276405	TRBV13	16.9645	-0.262827	0.168835	-1.55671	0.119539	0.999721
ENSG00000086061	DNAJA1	2487.6	-0.126638	0.0813778	-1.55618	0.119666	0.999721
ENSG00000156853	ZNF689	175.822	-0.129267	0.0830693	-1.55614	0.119675	0.999721
ENSG00000144895	EIF2A	1290.81	-0.101122	0.0649872	-1.55603	0.119701	0.999721
ENSG00000135521	LTV1	427.537	0.0850552	0.0546842	1.55539	0.119854	0.999721
ENSG00000139921	TMX1	853.142	-0.180994	0.116432	-1.5545	0.120065	0.999721
ENSG00000087152	ATXN7L3	1276.48	0.107329	0.0690486	1.5544	0.120089	0.999721
ENSG00000186665	C17orf58	26.995	-0.183377	0.117976	-1.55436	0.120098	0.999721
ENSG00000166435	XRRA1	130.199	-0.327592	0.21078	-1.55419	0.12014	0.999721
ENSG00000011143	MKS1	149.862	-0.220352	0.141792	-1.55406	0.120171	0.999721
ENSG00000138030	KHK	50.5393	0.221708	0.142701	1.55366	0.120266	0.999721
ENSG00000100234	TIMP3	41.2128	0.360134	0.231921	1.55283	0.120464	0.999721
ENSG00000206466	GABBR1	186.202	0.24187	0.155807	1.55237	0.120574	0.999721
ENSG00000143183	TMCO1	749.242	-0.119241	0.0768205	-1.55221	0.120613	0.999721
ENSG00000153147	SMARCA5	1861.66	-0.117317	0.075582	-1.55218	0.120618	0.999721
ENSG00000138772	ANXA3	1667.32	-0.351296	0.226398	-1.55168	0.12074	0.999721
ENSG00000179262	RAD23A	3781.04	0.217455	0.140164	1.55143	0.1208	0.999721
ENSG00000148926	ADM	228.052	0.35739	0.230441	1.5509	0.120926	0.999721
ENSG00000196656		645.42	-0.278724	0.179739	-1.55071	0.12097	0.999721
ENSG00000143363	PRUNE1	475.53	-0.120076	0.0774429	-1.55051	0.121019	0.999721
ENSG00000111319	SCNN1A	15.814	0.395175	0.255054	1.54937	0.121292	0.999721
ENSG00000266028	SRGAP2	911.468	0.16501	0.106503	1.54935	0.121297	0.999721
ENSG00000177685	CRACR2B	57.2234	-0.321124	0.207269	-1.54931	0.121308	0.999721
ENSG00000066027	PPP2R5A	1794.35	-0.132125	0.0853394	-1.54823	0.121567	0.999721
ENSG00000155506	LARP1	3195.02	0.136111	0.0880016	1.54668	0.12194	0.999721
ENSG00000164056	SPRY1	69.7602	0.192622	0.124541	1.54666	0.121946	0.999721
ENSG00000173041	ZNF680	140.598	-0.157335	0.101752	-1.54625	0.122044	0.999721
ENSG00000157833	GAREM2	38.0727	0.310303	0.200686	1.54621	0.122055	0.999721
ENSG00000181222	POLR2A	1108.13	0.197935	0.128024	1.54607	0.122088	0.999721
ENSG00000171448	ZBTB26	216.294	0.14614	0.0945336	1.54591	0.122127	0.999721
ENSG00000147202	DIAPH2	431.395	-0.163492	0.105774	-1.54568	0.122183	0.999721
ENSG00000132664	POLR3F	165.406	0.143697	0.0930191	1.54481	0.122391	0.999721
ENSG00000154263	ABCA10	26.7693	0.475554	0.307853	1.54474	0.122409	0.999721
ENSG00000164022	AIMP1	652.251	-0.0977605	0.0633	-1.5444	0.122492	0.999721
ENSG00000156299	TIAM1	676.871	-0.119636	0.0774768	-1.54415	0.122551	0.999721
ENSG00000275932	DUSP14	44.7814	0.198456	0.128547	1.54384	0.122627	0.999721
ENSG00000175106	TVP23C	28.0861	0.268483	0.173913	1.54378	0.122641	0.999721
ENSG00000198856	OSTC	785.296	-0.103961	0.0673426	-1.54376	0.122646	0.999721
ENSG00000213801	ZNF321P	63.4912	0.260258	0.168825	1.54158	0.123175	0.999721
ENSG00000065060	UHRF1BP1	379.438	0.136446	0.088521	1.5414	0.123219	0.999721
ENSG00000120885	CLU	277.772	0.405217	0.262891	1.54138	0.123223	0.999721
ENSG00000197483	ZNF628	96.1232	0.220014	0.142789	1.54084	0.123356	0.999721
ENSG00000023318	ERP44	1064.62	-0.0982504	0.0637937	-1.54013	0.12353	0.999721
ENSG00000134376	CRB1	46.5168	-0.441456	0.286688	-1.53985	0.123597	0.999721
ENSG00000136231	IGF2BP3	523.685	0.163453	0.106247	1.53843	0.123945	0.999721
ENSG00000023572	GLRX2	153.679	-0.196975	0.128059	-1.53815	0.124012	0.999721
ENSG00000282084	UBE2Q2P2	21.8085	0.415139	0.269907	1.53808	0.124028	0.999721
ENSG00000284599		12.6719	0.390904	0.254216	1.53768	0.124126	0.999721
ENSG00000117500	TMED5	1335.59	-0.140405	0.0913138	-1.53761	0.124145	0.999721
ENSG00000139675	HNRNPA1L2	113.423	0.133637	0.0869186	1.5375	0.124171	0.999721
ENSG00000074276	CDHR2	24.8505	-0.266712	0.173538	-1.5369	0.124317	0.999721
ENSG00000205903	ZNF316	978.002	0.17178	0.111771	1.53689	0.124319	0.999721
ENSG00000108846	ABCC3	113.817	0.305361	0.198705	1.53676	0.124353	0.999721
ENSG00000170074	FAM153A	22.4225	0.518633	0.337489	1.53674	0.124357	0.999721
ENSG00000205763	RP9P	26.0257	-0.378122	0.246056	-1.53673	0.124359	0.999721
ENSG00000217416	ISCA1P1	159.195	0.363287	0.236477	1.53624	0.124479	0.999721
ENSG00000212123	PRR22	15.3229	0.323978	0.210955	1.53576	0.124597	0.999721
ENSG00000101333	PLCB4	18.5451	0.331508	0.21599	1.53483	0.124825	0.999721
ENSG00000227780	ZBTB22	132.562	-0.447279	0.291645	-1.53364	0.125118	0.999721
ENSG00000205978	NYNRIN	30.6059	0.364729	0.237847	1.53346	0.125163	0.999721
ENSG00000206445	ATP6V1G2	14.4131	-0.408409	0.266481	-1.5326	0.125374	0.999721
ENSG00000130695	CEP85	351.893	0.135419	0.0883693	1.53242	0.12542	0.999721
ENSG00000135720	DYNC1LI2	1023.81	0.178615	0.11656	1.53239	0.125427	0.999721
ENSG00000125037	EMC3	2713.83	0.241856	0.157901	1.53169	0.125598	0.999721
ENSG00000173153	ESRRA	313.58	0.140768	0.091907	1.53163	0.125613	0.999721
ENSG00000166971	AKTIP	514.043	-0.129715	0.084732	-1.53089	0.125796	0.999721
ENSG00000114626	ABTB1	2528.73	0.165933	0.108423	1.53042	0.125913	0.999721
ENSG00000167797	CDK2AP2	478.974	-0.17683	0.115544	-1.53042	0.125913	0.999721
ENSG00000275577	VSTM1	136.794	-0.29979	0.195893	-1.53038	0.125924	0.999721
ENSG00000160445	ZER1	2452.43	0.241693	0.157963	1.53006	0.126001	0.999721
ENSG00000117643	MAN1C1	765.137	-0.152556	0.0997553	-1.5293	0.126191	0.999721
ENSG00000164649	CDCA7L	1079.03	-0.107471	0.0703114	-1.5285	0.126389	0.999721
ENSG00000080298	RFX3	274.491	0.257796	0.168784	1.52737	0.126668	0.999721
ENSG00000070501	POLB	179.612	-0.0988332	0.0647082	-1.52737	0.12667	0.999721
ENSG00000153827	TRIP12	5015.5	0.197495	0.12935	1.52682	0.126806	0.999721
ENSG00000170315	UBB	78630	0.271521	0.177875	1.52647	0.126892	0.999721
ENSG00000147689	FAM83A	112.091	0.463789	0.303833	1.52646	0.126895	0.999721
ENSG00000105221	AKT2	2738.23	0.180232	0.118119	1.52586	0.127046	0.999721
ENSG00000214253	FIS1	2153.94	0.250621	0.164271	1.52565	0.127096	0.999721
ENSG00000233913	RPL10P9	116.748	0.820989	0.538386	1.52491	0.127282	0.999721
ENSG00000197170	PSMD12	420.432	-0.134738	0.0883672	-1.52475	0.12732	0.999721
ENSG00000089154	GCN1	1583.86	0.175154	0.114924	1.52409	0.127487	0.999721
ENSG00000002587	HS3ST1	52.6308	0.365018	0.239523	1.52394	0.127524	0.999721
ENSG00000146007	ZMAT2	3738.15	0.218887	0.143668	1.52356	0.127618	0.999721
ENSG00000141564	RPTOR	480.59	-0.169446	0.111226	-1.52344	0.12765	0.999721
ENSG00000162607	USP1	1028.74	-0.12395	0.0813769	-1.52316	0.127718	0.999721
ENSG00000180992	MRPL14	204.765	0.137748	0.0904517	1.52289	0.127787	0.999721
ENSG00000171174	RBKS	38.8945	-0.292166	0.191872	-1.52271	0.12783	0.999721
ENSG00000237111	IGHJ3P	27.8993	0.33195	0.218025	1.52253	0.127875	0.999721
ENSG00000173545	ZNF622	242.354	-0.139307	0.0915115	-1.52229	0.127938	0.999721
ENSG00000113161	HMGCR	750.021	0.146254	0.096108	1.52177	0.128066	0.999721
ENSG00000104231	ZFAND1	485.802	-0.110485	0.0726103	-1.52161	0.128106	0.999721
ENSG00000166848	TERF2IP	10751.3	0.245942	0.161682	1.52115	0.128221	0.999721
ENSG00000166046	TCP11L2	2047.67	0.269514	0.177183	1.5211	0.128235	0.999721
ENSG00000010361	FUZ	191.031	0.158388	0.104159	1.52063	0.128353	0.999721
ENSG00000112110	MRPL18	378.124	-0.130559	0.0858589	-1.52062	0.128355	0.999721
ENSG00000184584	TMEM173	1094.21	-0.10004	0.065799	-1.52038	0.128415	0.999721
ENSG00000183628	DGCR6	52.2122	-0.234282	0.154108	-1.52024	0.12845	0.999721
ENSG00000160439	RDH13	81.9988	0.26261	0.172785	1.51986	0.128546	0.999721
ENSG00000179304	FAM156B	57.561	-0.517355	0.340433	-1.51969	0.128588	0.999721
ENSG00000169435	RASSF6	30.4288	0.249547	0.164211	1.51967	0.128593	0.999721
ENSG00000232869	TRBV29-1	87.7237	-0.191845	0.126274	-1.51927	0.128695	0.999721
ENSG00000163701	IL17RE	15.5347	0.370463	0.244068	1.51787	0.129047	0.999721
ENSG00000233348	BAG6	1361.24	0.193825	0.127764	1.51706	0.129251	0.999721
ENSG00000117899	MESD	498.734	-0.0885839	0.0583981	-1.5169	0.129293	0.999721
ENSG00000005100	DHX33	289.148	0.134673	0.0888502	1.51573	0.129588	0.999721
ENSG00000152785	BMP3	55.0068	0.253658	0.167364	1.5156	0.12962	0.999721
ENSG00000106636	YKT6	846.791	0.0617892	0.0407751	1.51537	0.129679	0.999721
ENSG00000112855	HARS2	472.077	0.0949375	0.0626542	1.51526	0.129706	0.999721
ENSG00000178921	PFAS	361.095	0.192365	0.126977	1.51495	0.129784	0.999721
ENSG00000104312	RIPK2	297.786	-0.206827	0.136615	-1.51394	0.130041	0.999721
ENSG00000134001	EIF2S1	859.968	0.118381	0.0782033	1.51376	0.130087	0.999721
ENSG00000231793	DOC2GP	75.0184	0.255281	0.168674	1.51345	0.130164	0.999721
ENSG00000184719	RNLS	20.406	0.211399	0.139741	1.51279	0.130333	0.999721
ENSG00000094755	GABRP	15.1525	0.370668	0.245121	1.51219	0.130487	0.999721
ENSG00000131778	CHD1L	668.75	0.110904	0.073361	1.51176	0.130594	0.999721
ENSG00000131634	TMEM204	501.45	-0.19167	0.126806	-1.51152	0.130657	0.999721
ENSG00000088881	EBF4	11.4981	-0.39016	0.258129	-1.51149	0.130663	0.999721
ENSG00000144366	GULP1	19.7034	0.592951	0.392542	1.51054	0.130906	0.999721
ENSG00000143502	SUSD4	124.664	-0.2497	0.165355	-1.51008	0.131022	0.999721
ENSG00000136158	SPRY2	63.061	-0.188926	0.125113	-1.51005	0.131032	0.999721
ENSG00000184319	RPL23AP82	190.603	0.140005	0.09273	1.50982	0.13109	0.999721
ENSG00000272617		277.174	0.178731	0.118408	1.50945	0.131183	0.999721
ENSG00000139645	ANKRD52	658.678	0.133914	0.0887354	1.50913	0.131264	0.999721
ENSG00000143919	CAMKMT	84.4559	-0.187053	0.124005	-1.50843	0.131446	0.999721
ENSG00000072736	NFATC3	2137.01	-0.0754314	0.0500072	-1.50841	0.13145	0.999721
ENSG00000152518	ZFP36L2	11082.3	-0.102516	0.067973	-1.50819	0.131506	0.999721
ENSG00000162227	TAF6L	146.437	0.193159	0.128102	1.50786	0.131591	0.999721
ENSG00000205639	MFSD2B	554.692	0.283167	0.187796	1.50784	0.131595	0.999721
ENSG00000163947	ARHGEF3	1392.26	-0.0910458	0.0603838	-1.50779	0.131609	0.999721
ENSG00000173950	XXYLT1	142.357	0.121958	0.0808985	1.50755	0.131671	0.999721
ENSG00000229183	PGA4	36.3618	-0.621622	0.41247	-1.50707	0.131793	0.999721
ENSG00000073417	PDE8A	240.611	0.151975	0.100861	1.50678	0.131868	0.999721
ENSG00000180185	FAHD1	194.578	0.121624	0.0807355	1.50644	0.131953	0.999721
ENSG00000132591	ERAL1	352.861	0.105431	0.0700037	1.50608	0.132046	0.999721
ENSG00000165617	DACT1	461.933	-0.211973	0.140778	-1.50573	0.132136	0.999721
ENSG00000163013	FBXO41	512.96	0.191388	0.127149	1.50522	0.132268	0.999721
ENSG00000052126	PLEKHA5	103.061	0.128782	0.0855847	1.50474	0.132392	0.999721
ENSG00000180011	ZADH2	671.024	-0.0780791	0.0518947	-1.50457	0.132435	0.999721
ENSG00000172572	PDE3A	15.7497	0.425104	0.282586	1.50434	0.132495	0.999721
ENSG00000159063	ALG8	206.302	-0.129052	0.0858791	-1.50272	0.132912	0.999721
ENSG00000132823	OSER1	782.17	0.130039	0.0865526	1.50243	0.132986	0.999721
ENSG00000077157	PPP1R12B	521.132	0.268972	0.179026	1.50242	0.132989	0.999721
ENSG00000071575	TRIB2	2070.28	0.115285	0.0767616	1.50185	0.133135	0.999721
ENSG00000168297	PXK	778.293	-0.140874	0.0938188	-1.50155	0.133212	0.999721
ENSG00000075826	SEC31B	867.632	0.184648	0.122994	1.50128	0.133284	0.999721
ENSG00000086712	TXLNG	462.6	-0.109645	0.0730391	-1.50118	0.13331	0.999721
ENSG00000261308	FIGNL2	9.42126	0.332477	0.221601	1.50034	0.133527	0.999721
ENSG00000129007	CALML4	193.018	-0.18448	0.123072	-1.49897	0.133882	0.999721
ENSG00000196510	ANAPC7	602.81	0.115636	0.0771553	1.49874	0.133941	0.999721
ENSG00000137216	TMEM63B	910.568	0.241417	0.161094	1.49861	0.133974	0.999721
ENSG00000138686	BBS7	207.359	0.238157	0.158927	1.49853	0.133995	0.999721
ENSG00000115421	PAPOLG	608.183	-0.108182	0.0721925	-1.49853	0.133997	0.999721
ENSG00000100226	GTPBP1	1297.65	0.168144	0.112231	1.4982	0.134082	0.999721
ENSG00000145911	N4BP3	91.8487	0.191905	0.12811	1.49796	0.134142	0.999721
ENSG00000184481	FOXO4	4047.38	0.263285	0.175923	1.49659	0.1345	0.999721
ENSG00000153551	CMTM7	728.681	-0.150754	0.100739	-1.49647	0.13453	0.999721
ENSG00000166035	LIPC	32.7156	0.303137	0.202572	1.49644	0.134538	0.999721
ENSG00000168461	RAB31	2310.99	-0.196583	0.131406	-1.496	0.134653	0.999721
ENSG00000124549	BTN2A3P	38.5959	0.198866	0.132972	1.49555	0.134772	0.999721
ENSG00000166126	AMN	39.7631	0.243573	0.162898	1.49525	0.13485	0.999721
ENSG00000085465	OVGP1	28.6897	0.296873	0.198559	1.49514	0.134879	0.999721
ENSG00000111639	MRPL51	528.859	-0.251926	0.168523	-1.49491	0.134938	0.999721
ENSG00000137713	PPP2R1B	477.244	0.227552	0.152235	1.49474	0.134981	0.999721
ENSG00000139651	ZNF740	871.073	0.166337	0.111294	1.49457	0.135028	0.999721
ENSG00000135245	HILPDA	26.3566	0.171811	0.115051	1.49334	0.135348	0.999721
ENSG00000250506	CDK3	110.194	0.146523	0.0981278	1.49318	0.13539	0.999721
ENSG00000131469	RPL27	7952.1	-0.153826	0.103052	-1.49271	0.135514	0.999721
ENSG00000165169	DYNLT3	232.978	-0.104341	0.0699027	-1.49266	0.135527	0.999721
ENSG00000062282	DGAT2	338.248	0.248559	0.166533	1.49255	0.135555	0.999721
ENSG00000241258	CRCP	371.737	-0.122978	0.0824123	-1.49223	0.135639	0.999721
ENSG00000189430	NCR1	37.726	0.776508	0.520471	1.49193	0.135717	0.999721
ENSG00000130997	POLN	15.3755	-0.312679	0.209603	-1.49177	0.13576	0.999721
ENSG00000160229	ZNF66	19.3731	0.293327	0.196734	1.49098	0.135966	0.999721
ENSG00000016391	CHDH	15.9657	0.418836	0.281036	1.49033	0.136138	0.999721
ENSG00000138430	OLA1	829.45	-0.100311	0.067319	-1.49008	0.136203	0.999721
ENSG00000240118	PSMB9	484.39	-0.294171	0.197512	-1.48938	0.136387	0.999721
ENSG00000182179	UBA7	1556.4	0.125428	0.0842212	1.48927	0.136418	0.999721
ENSG00000161647	MPP3	12.0709	0.489197	0.328571	1.48886	0.136523	0.999721
ENSG00000111666	CHPT1	2126.22	0.264946	0.178038	1.48814	0.136714	0.999721
ENSG00000130940	CASZ1	130.834	0.253552	0.170408	1.48791	0.136774	0.999721
ENSG00000133606	MKRN1	24123.6	0.269367	0.181063	1.48769	0.136832	0.999721
ENSG00000113504	SLC12A7	781.867	0.219828	0.14781	1.48723	0.136954	0.999721
ENSG00000104946	TBC1D17	1023.33	0.154208	0.103743	1.48643	0.137165	0.999721
ENSG00000077380	DYNC1I2	996.844	-0.100413	0.0675639	-1.4862	0.137226	0.999721
ENSG00000176845	METRNL	227.011	-0.346336	0.233066	-1.486	0.137279	0.999721
ENSG00000182512	GLRX5	6140.23	0.286612	0.192943	1.48547	0.137419	0.999721
ENSG00000135823	STX6	604.786	0.088993	0.0599508	1.48443	0.137694	0.999721
ENSG00000157870	FAM213B	312.538	0.171339	0.115425	1.48441	0.1377	0.999721
ENSG00000124507	PACSIN1	56.4854	0.22858	0.154017	1.48412	0.137776	0.999721
ENSG00000196284	SUPT3H	95.0387	0.214169	0.144319	1.484	0.137809	0.999721
ENSG00000164713	BRI3	947.341	-0.224553	0.151391	-1.48327	0.138003	0.999721
ENSG00000167112	TRUB2	202.75	0.149341	0.100692	1.48315	0.138034	0.999721
ENSG00000110330	BIRC2	3230.55	0.213072	0.143673	1.48303	0.138067	0.999721
ENSG00000158793	NIT1	336.821	0.0999508	0.0674012	1.48292	0.138095	0.999721
ENSG00000109775	UFSP2	230.04	-0.138652	0.0935141	-1.48269	0.138157	0.999721
ENSG00000143498	TAF1A	77.4174	0.197498	0.133215	1.48255	0.138193	0.999721
ENSG00000165819	METTL3	858.471	0.116549	0.0786176	1.48248	0.138213	0.999721
ENSG00000159592	GPBP1L1	2370.62	-0.0907507	0.0612318	-1.48208	0.138318	0.999721
ENSG00000070404	FSTL3	138.39	-0.228327	0.154078	-1.48189	0.138369	0.999721
ENSG00000205670	SMIM11A	83.289	-0.46338	0.312717	-1.48179	0.138397	0.999721
ENSG00000128708	HAT1	617.027	-0.105083	0.0709198	-1.48172	0.138415	0.999721
ENSG00000145335	SNCA	29436.9	0.300075	0.202535	1.48159	0.138449	0.999721
ENSG00000100979	PLTP	31.1612	0.212837	0.143658	1.48155	0.13846	0.999721
ENSG00000090861	AARS	665.046	0.111159	0.0750371	1.48139	0.138503	0.999721
ENSG00000258984	UBE2F-SCLY	28.0223	0.351822	0.237523	1.48121	0.13855	0.999721
ENSG00000170448	NFXL1	208.718	0.163963	0.110831	1.47941	0.139032	0.999721
ENSG00000185869	ZNF829	85.2101	-0.156143	0.105575	-1.47898	0.139145	0.999721
ENSG00000134909	ARHGAP32	298.746	0.161143	0.108958	1.47895	0.139153	0.999721
ENSG00000120645	IQSEC3	81.4861	0.499929	0.338135	1.47849	0.139278	0.999721
ENSG00000095209	TMEM38B	187.158	-0.276187	0.186812	-1.47843	0.139294	0.999721
ENSG00000122557	HERPUD2	971.851	-0.0936894	0.0633765	-1.4783	0.139328	0.999721
ENSG00000172270	BSG	22342.9	0.235115	0.159086	1.47791	0.139433	0.999721
ENSG00000197712	FAM114A1	36.5193	-0.308691	0.208947	-1.47737	0.139577	0.999721
ENSG00000133816	MICAL2	6992.45	0.282259	0.191065	1.47729	0.139597	0.999721
ENSG00000111203	ITFG2	467.273	0.167096	0.113209	1.47599	0.139947	0.999721
ENSG00000137500	CCDC90B	551.054	-0.1214	0.0822554	-1.47589	0.139973	0.999721
ENSG00000197405	C5AR1	2342.95	-0.219423	0.148896	-1.47366	0.140572	0.999721
ENSG00000285277		63.7984	-0.348021	0.23618	-1.47354	0.140606	0.999721
ENSG00000237973	MTCO1P12	868.509	-0.444865	0.301905	-1.47353	0.140608	0.999721
ENSG00000146833	TRIM4	661.311	-0.0706905	0.0479753	-1.47348	0.140623	0.999721
ENSG00000100023	PPIL2	831.619	0.120883	0.0820713	1.4729	0.140779	0.999721
ENSG00000100219	XBP1	2263.9	-0.105501	0.0716312	-1.47283	0.140797	0.999721
ENSG00000170684	ZNF296	51.1534	0.219399	0.149043	1.47205	0.141007	0.999721
ENSG00000259984		51.6049	0.311383	0.211567	1.47179	0.141076	0.999721
ENSG00000170417	TMEM182	44.876	-0.209416	0.142348	-1.47116	0.141248	0.999721
ENSG00000211445	GPX3	19.8751	-0.282023	0.191767	-1.47066	0.141384	0.999721
ENSG00000176973	FAM89B	647.381	0.159853	0.108703	1.47055	0.141413	0.999721
ENSG00000152475	ZNF837	25.2523	0.264091	0.179693	1.46968	0.141649	0.999721
ENSG00000132604	TERF2	371.386	-0.107807	0.0733711	-1.46934	0.141739	0.999721
ENSG00000116580	GON4L	1032.92	0.175028	0.11912	1.46934	0.14174	0.999721
ENSG00000266405	CBXP2	35.6087	0.180574	0.122938	1.46882	0.141881	0.999721
ENSG00000177917	ARL6IP6	350.773	-0.162702	0.110776	-1.46874	0.141903	0.999721
ENSG00000091009	RBM27	694.995	-0.103623	0.0705575	-1.46863	0.141934	0.999721
ENSG00000105737	GRIK5	35.7965	-0.264526	0.18018	-1.46812	0.142071	0.999721
ENSG00000148346	LCN2	4092.82	-0.352165	0.239883	-1.46807	0.142085	0.999721
ENSG00000180815	MAP3K15	9.55848	-0.333801	0.227452	-1.46757	0.142221	0.999721
ENSG00000179820	MYADM	2896.99	-0.155714	0.106105	-1.46755	0.142228	0.999721
ENSG00000101230	ISM1	14.8482	-0.320429	0.21836	-1.46743	0.142259	0.999721
ENSG00000144746	ARL6IP5	3373.17	-0.107123	0.0730046	-1.46735	0.142281	0.999721
ENSG00000180229	HERC2P3	403.05	0.325595	0.221949	1.46698	0.14238	0.999721
ENSG00000197808	ZNF461	80.7586	0.183524	0.125105	1.46696	0.142387	0.999721
ENSG00000004866	ST7	122.938	0.17756	0.121048	1.46686	0.142413	0.999721
ENSG00000136938	ANP32B	5351.54	0.167271	0.114079	1.46627	0.142574	0.999721
ENSG00000136319	TTC5	260.265	0.137131	0.0935262	1.46623	0.142586	0.999721
ENSG00000124216	SNAI1	21.6469	-0.355784	0.242658	-1.4662	0.142595	0.999721
ENSG00000151725	CENPU	117.93	-0.269365	0.183727	-1.46612	0.142616	0.999721
ENSG00000138629	UBL7	1215.46	0.168039	0.114635	1.46587	0.142684	0.999721
ENSG00000284454		424.878	0.26797	0.182816	1.4658	0.142704	0.999721
ENSG00000107485	GATA3	459.505	-0.148387	0.101275	-1.46519	0.14287	0.999721
ENSG00000136463	TACO1	152.818	0.116479	0.0795168	1.46483	0.142967	0.999721
ENSG00000119950	MXI1	9169.82	0.300476	0.205159	1.4646	0.143031	0.999721
ENSG00000189007	ADAT2	431.518	0.224629	0.153383	1.4645	0.143058	0.999721
ENSG00000079246	XRCC5	4603.24	-0.0952889	0.0651288	-1.46308	0.143444	0.999721
ENSG00000165168	CYBB	10657.3	-0.178917	0.122303	-1.4629	0.143496	0.999721
ENSG00000126773	PCNX4	831.477	-0.155626	0.106425	-1.46231	0.143658	0.999721
ENSG00000145700	ANKRD31	14.714	0.331564	0.226759	1.46219	0.14369	0.999721
ENSG00000141294	LRRC46	12.4266	-0.33372	0.228327	-1.46159	0.143854	0.999721
ENSG00000143952	VPS54	583.346	-0.106874	0.0731345	-1.46134	0.143922	0.999721
ENSG00000142784	WDTC1	2385.27	0.166734	0.114139	1.4608	0.144072	0.999721
ENSG00000112079	STK38	3829.44	-0.0864873	0.0592268	-1.46027	0.144215	0.999721
ENSG00000181885	CLDN7	19.7592	0.245818	0.168433	1.45944	0.144443	0.999721
ENSG00000213203	GIMAP1	1809.01	-0.0871143	0.0597199	-1.45871	0.144644	0.999721
ENSG00000136014	USP44	55.4089	0.322554	0.221223	1.45805	0.144828	0.999721
ENSG00000155592	ZKSCAN2	70.8857	0.164692	0.112955	1.45803	0.144832	0.999721
ENSG00000145388	METTL14	378.446	-0.144498	0.0991085	-1.45798	0.144846	0.999721
ENSG00000126860	EVI2A	1976.78	-0.158077	0.108493	-1.45703	0.145109	0.999721
ENSG00000186792	HYAL3	106.183	-0.272645	0.187129	-1.45699	0.14512	0.999721
ENSG00000126368	NR1D1	112.788	-0.146597	0.100672	-1.45618	0.145342	0.999721
ENSG00000129657	SEC14L1	3136.05	0.170558	0.117135	1.45608	0.14537	0.999721
ENSG00000158578	ALAS2	111161	0.41175	0.28287	1.45562	0.145499	0.999721
ENSG00000102003	SYP	17.5035	-0.367013	0.252153	-1.45552	0.145526	0.999721
ENSG00000115339	GALNT3	198.098	-0.185935	0.127783	-1.45508	0.145646	0.999721
ENSG00000166377	ATP9B	300.868	0.120148	0.0825737	1.45504	0.145658	0.999721
ENSG00000130669	PAK4	102.324	-0.187208	0.128668	-1.45496	0.145679	0.999721
ENSG00000038532	CLEC16A	669.903	0.133194	0.091556	1.45478	0.14573	0.999721
ENSG00000138035	PNPT1	480.972	0.16327	0.112251	1.45451	0.145805	0.999721
ENSG00000160917	CPSF4	280.746	0.11253	0.0773866	1.45413	0.145911	0.999721
ENSG00000115641	FHL2	49.2748	0.254219	0.174851	1.45392	0.145968	0.999721
ENSG00000103148	NPRL3	2402.23	0.248294	0.170908	1.4528	0.14628	0.999721
ENSG00000225932	CTAGE4	15.7569	-0.509089	0.350454	-1.45265	0.14632	0.999721
ENSG00000101412	E2F1	130.157	0.174078	0.119856	1.4524	0.146392	0.999721
ENSG00000149131	SERPING1	56.17	-0.252766	0.174041	-1.45234	0.146408	0.999721
ENSG00000281385	AP2A2	247.522	-0.20923	0.144129	-1.45168	0.146589	0.999721
ENSG00000084764	MAPRE3	37.5263	0.249988	0.172229	1.45149	0.146645	0.999721
ENSG00000170581	STAT2	2077.71	0.0947296	0.0652938	1.45082	0.14683	0.999721
ENSG00000152359	POC5	157.621	-0.158754	0.109456	-1.4504	0.146948	0.999721
ENSG00000067182	TNFRSF1A	1531.57	-0.190621	0.131468	-1.44994	0.147074	0.999721
ENSG00000163291	PAQR3	198.455	-0.239605	0.165265	-1.44982	0.147107	0.999721
ENSG00000081791	DELE1	968.179	0.0686289	0.0473556	1.44922	0.147275	0.999721
ENSG00000198712	MT-CO2	21967.9	-0.183866	0.12695	-1.44833	0.147524	0.999721
ENSG00000213199	ASIC3	39.8652	0.294248	0.203395	1.44669	0.147985	0.999721
ENSG00000124772	CPNE5	244.107	0.173468	0.11998	1.4458	0.148232	0.999721
ENSG00000079950	STX7	2070.17	0.144524	0.0999639	1.44576	0.148243	0.999721
ENSG00000174791	RIN1	109.743	-0.292371	0.202232	-1.44572	0.148255	0.999721
ENSG00000107829	FBXW4	459.618	0.132766	0.0918351	1.4457	0.14826	0.999721
ENSG00000163053	SLC16A14	15.0174	-0.255322	0.176616	-1.44563	0.14828	0.999721
ENSG00000158825	CDA	616.512	-0.210487	0.145618	-1.44547	0.148326	0.999721
ENSG00000105402	NAPA	2321.3	0.168254	0.116442	1.44496	0.14847	0.999721
ENSG00000184216	IRAK1	1190.71	0.0735708	0.0509263	1.44465	0.148556	0.999721
ENSG00000196074	SYCP2	101.271	0.25911	0.179366	1.44458	0.148575	0.999721
ENSG00000144792	ZNF660	39.0371	-0.293165	0.203116	-1.44333	0.148927	0.999721
ENSG00000196684	HSH2D	723.081	0.113862	0.0788951	1.44321	0.148961	0.999721
ENSG00000198855	FICD	39.4301	-0.190109	0.131784	-1.44258	0.149139	0.999721
ENSG00000018699	TTC27	251.591	-0.103392	0.0717165	-1.44168	0.149394	0.999721
ENSG00000132481	TRIM47	40.4028	0.229051	0.158912	1.44137	0.14948	0.999721
ENSG00000188846	RPL14	6802.98	-0.135851	0.0942765	-1.44099	0.149588	0.999721
ENSG00000136536	43166	2443.12	-0.110113	0.0764312	-1.44068	0.149674	0.999721
ENSG00000279247	AK6	28.0229	0.352998	0.245063	1.44044	0.149743	0.999721
ENSG00000127952	STYXL1	260.969	-0.219815	0.152668	-1.43982	0.149919	0.999721
ENSG00000076554	TPD52	331.388	0.209166	0.145282	1.43972	0.149945	0.999721
ENSG00000187753	C9orf153	22.8371	0.364165	0.252947	1.43969	0.149956	0.999721
ENSG00000206418	RAB12	234.902	-0.103715	0.0720443	-1.4396	0.14998	0.999721
ENSG00000285258	ATXN7	251.448	0.182687	0.126932	1.43925	0.15008	0.999721
ENSG00000003393	ALS2	290.523	-0.18731	0.13017	-1.43896	0.150161	0.999721
ENSG00000134460	IL2RA	97.305	0.290132	0.201654	1.43876	0.150218	0.999721
ENSG00000169884	WNT10B	32.6593	0.276636	0.192382	1.43795	0.150448	0.999721
ENSG00000130758	MAP3K10	183.626	0.185435	0.128988	1.43761	0.150543	0.999721
ENSG00000229988	HBBP1	291.262	0.331147	0.230432	1.43707	0.150698	0.999721
ENSG00000198060	43164	584.021	0.136994	0.095375	1.43637	0.150898	0.999721
ENSG00000008283	CYB561	51.2625	0.204306	0.142242	1.43633	0.150909	0.999721
ENSG00000163687	DNASE1L3	22.2895	0.209638	0.145956	1.43631	0.150915	0.999721
ENSG00000217801		45.8551	0.244167	0.17	1.43628	0.150924	0.999721
ENSG00000214279	SCART1	76.2717	0.233088	0.162292	1.43622	0.150939	0.999721
ENSG00000169992	NLGN2	44.3791	0.26873	0.187125	1.43609	0.150975	0.999721
ENSG00000131238	PPT1	3103.66	-0.187402	0.130511	-1.43591	0.151027	0.999721
ENSG00000215641	TRIM27	46.0385	0.458737	0.319516	1.43573	0.151081	0.999721
ENSG00000148835	TAF5	157.969	-0.0704276	0.0490597	-1.43555	0.151131	0.999721
ENSG00000107554	DNMBP	177.028	-0.109227	0.0761227	-1.43487	0.151323	0.999721
ENSG00000166170	BAG5	737.942	-0.115465	0.0804931	-1.43448	0.151436	0.999721
ENSG00000175414	ARL10	255.406	0.226887	0.158169	1.43446	0.151442	0.999721
ENSG00000166164	BRD7	1283	-0.157087	0.109515	-1.43439	0.151461	0.999721
ENSG00000158079	PTPDC1	67.2452	-0.153437	0.106983	-1.43422	0.151508	0.999721
ENSG00000184508	HDDC3	172.829	0.123027	0.0858836	1.43249	0.152003	0.999721
ENSG00000141127	PRPSAP2	597.415	0.112274	0.0783807	1.43242	0.152025	0.999721
ENSG00000175352	NRIP3	23.0768	0.263587	0.184176	1.43117	0.152381	0.999721
ENSG00000103642	LACTB	472.567	-0.139046	0.0971624	-1.43107	0.152411	0.999721
ENSG00000198517	MAFK	519.092	0.171678	0.119973	1.43097	0.152438	0.999721
ENSG00000146192	FGD2	1474.89	0.16383	0.11449	1.43095	0.152443	0.999721
ENSG00000159164	SV2A	51.1845	0.1574	0.110017	1.43069	0.152519	0.999721
ENSG00000173585	CCR9	55.3789	-0.200068	0.139844	-1.43065	0.152531	0.999721
ENSG00000090581	GNPTG	450.061	-0.117649	0.0822708	-1.43003	0.15271	0.999721
ENSG00000278372	MYO19	416.02	0.191971	0.134243	1.43002	0.152711	0.999721
ENSG00000116396	KCNC4	101.944	0.386864	0.270531	1.43001	0.152713	0.999721
ENSG00000173442	EHBP1L1	4002.69	0.16534	0.115656	1.42959	0.152834	0.999721
ENSG00000080824	HSP90AA1	9008.96	-0.125977	0.0881321	-1.42941	0.152887	0.999721
ENSG00000108107	RPL28	8004.24	-0.189914	0.132884	-1.42917	0.152957	0.999721
ENSG00000198331	HYLS1	51.8404	-0.149575	0.104681	-1.42886	0.153044	0.999721
ENSG00000177879	AP3S1	786.873	-0.153852	0.10771	-1.42839	0.153179	0.999721
ENSG00000126803	HSPA2	13.8735	0.277856	0.194526	1.42838	0.153184	0.999721
ENSG00000113068	PFDN1	420.266	-0.118058	0.0826541	-1.42834	0.153193	0.999721
ENSG00000186318	BACE1	97.4277	-0.271429	0.190139	-1.42753	0.153428	0.999721
ENSG00000186312	CA5BP1	131.753	-0.132088	0.0925355	-1.42743	0.153457	0.999721
ENSG00000114988	LMAN2L	151.489	-0.104216	0.0730639	-1.42637	0.153763	0.999721
ENSG00000179532	DNHD1	328.546	0.172443	0.120943	1.42582	0.153921	0.999721
ENSG00000213090		41.1472	0.307738	0.215917	1.42526	0.154082	0.999721
ENSG00000137193	PIM1	10382.5	0.200939	0.141013	1.42497	0.154167	0.999721
ENSG00000138161	CUZD1	23.4382	0.21806	0.153049	1.42477	0.154224	0.999721
ENSG00000158882	TOMM40L	178.543	0.104262	0.07319	1.42454	0.154291	0.999721
ENSG00000226742	HSBP1L1	41.3999	-0.193788	0.136086	-1.42401	0.154445	0.999721
ENSG00000065923	SLC9A7	332.621	0.172252	0.120979	1.42381	0.1545	0.999721
ENSG00000095321	CRAT	361.812	0.125703	0.0883101	1.42343	0.154611	0.999721
ENSG00000112655	PTK7	227.236	0.201812	0.141799	1.42323	0.154671	0.999721
ENSG00000115325	DOK1	380.38	-0.163674	0.115062	-1.42249	0.154884	0.999721
ENSG00000198356	ASNA1	546.557	0.110029	0.0773866	1.42181	0.155081	0.999721
ENSG00000204103	MAFB	712.779	0.219124	0.154146	1.42154	0.155161	0.999721
ENSG00000117013	KCNQ4	15.9533	0.241354	0.169789	1.42149	0.155174	0.999721
ENSG00000276053	LAIR1	273.5	-0.191905	0.135005	-1.42147	0.15518	0.999721
ENSG00000216775		14.8057	0.367888	0.258825	1.42138	0.155207	0.999721
ENSG00000124299	PEPD	433.679	0.119509	0.0841276	1.42057	0.155441	0.999721
ENSG00000029364	SLC39A9	634.537	-0.125056	0.0880612	-1.4201	0.155579	0.999721
ENSG00000175582	RAB6A	2447.24	-0.110583	0.0779255	-1.41909	0.155874	0.999721
ENSG00000133872	SARAF	9865.95	-0.0705578	0.0497412	-1.4185	0.156045	0.999721
ENSG00000000971	CFH	36.9938	0.247293	0.174473	1.41737	0.156375	0.999721
ENSG00000143624	INTS3	1528.94	-0.139401	0.0983564	-1.41731	0.156394	0.999721
ENSG00000153832	FBXO36	11.5537	0.220519	0.155608	1.41715	0.156439	0.999721
ENSG00000232326	TAP2	157.332	-0.318224	0.224631	-1.41665	0.156584	0.999721
ENSG00000137441	FGFBP2	532.868	-0.181796	0.128333	-1.4166	0.156599	0.999721
ENSG00000172794	RAB37	991.466	0.125991	0.0889671	1.41616	0.156729	0.999721
ENSG00000277400		15.4413	-0.579936	0.409884	-1.41488	0.157104	0.999721
ENSG00000261150	EPPK1	118.91	-0.209713	0.148246	-1.41463	0.157177	0.999721
ENSG00000130303	BST2	790.86	-0.22915	0.161989	-1.4146	0.157187	0.999721
ENSG00000196415	PRTN3	1138.46	-0.487634	0.344729	-1.41454	0.157202	0.999721
ENSG00000174233	ADCY6	29.1927	0.270046	0.190977	1.41402	0.157356	0.999721
ENSG00000115685	PPP1R7	613.94	-0.0941704	0.0666201	-1.41354	0.157496	0.999721
ENSG00000161011	SQSTM1	2427.81	0.112149	0.0793643	1.41309	0.15763	0.999721
ENSG00000230797	YY2	16.3556	-0.184826	0.130804	-1.41301	0.157654	0.999721
ENSG00000133574	GIMAP4	5040.77	-0.094999	0.0672337	-1.41297	0.157665	0.999721
ENSG00000187098	MITF	77.7253	0.252366	0.178775	1.41164	0.158056	0.999721
ENSG00000172824	CES4A	116.293	0.228062	0.161584	1.41141	0.158122	0.999721
ENSG00000140263	SORD	209.54	0.160899	0.113999	1.41141	0.158123	0.999721
ENSG00000219200	RNASEK	1222.25	-0.152782	0.108248	-1.41141	0.158124	0.999721
ENSG00000161638	ITGA5	1808.79	-0.0873437	0.0618849	-1.41139	0.15813	0.999721
ENSG00000138031	ADCY3	308.214	0.22972	0.162781	1.41122	0.15818	0.999721
ENSG00000187736	NHEJ1	170.608	-0.117147	0.0830213	-1.41105	0.158229	0.999721
ENSG00000099797	TECR	570.312	-0.147494	0.104532	-1.41099	0.158248	0.999721
ENSG00000078053	AMPH	14.9487	-0.345129	0.244638	-1.41077	0.158312	0.999721
ENSG00000241489		261.802	0.230126	0.163187	1.4102	0.158481	0.999721
ENSG00000008516	MMP25	1048.14	0.289798	0.205503	1.41019	0.158484	0.999721
ENSG00000134247	PTGFRN	61.715	-0.37804	0.268114	-1.41	0.15854	0.999721
ENSG00000165685	TMEM52B	22.6327	-0.330896	0.234769	-1.40945	0.158702	0.999721
ENSG00000178694	NSUN3	1104.41	0.272839	0.193588	1.40938	0.158722	0.999721
ENSG00000129235	TXNDC17	221.219	-0.296822	0.210614	-1.40932	0.158741	0.999721
ENSG00000126953	TIMM8A	74.8241	0.155569	0.1104	1.40914	0.158795	0.999721
ENSG00000239626	RPSAP41	11.9757	-0.284835	0.202213	-1.40859	0.158956	0.999721
ENSG00000122591	FAM126A	488.629	0.139182	0.0988217	1.40842	0.159008	0.999721
ENSG00000147251	DOCK11	2561.38	-0.153377	0.108919	-1.40817	0.159082	0.999721
ENSG00000082068	WDR70	381.046	-0.153157	0.108764	-1.40816	0.159083	0.999721
ENSG00000100353	EIF3D	2964.06	-0.102639	0.0729272	-1.40742	0.159304	0.999721
ENSG00000266714	MYO15B	2117.63	0.158161	0.112389	1.40727	0.159347	0.999721
ENSG00000107566	ERLIN1	590.854	-0.212544	0.151053	-1.40709	0.159402	0.999721
ENSG00000164038	SLC9B2	149.701	0.1732	0.123108	1.40689	0.159459	0.999721
ENSG00000131042	LILRB2	368.289	-0.761172	0.541123	-1.40665	0.15953	0.999721
ENSG00000133256	PDE6B	78.2885	0.180412	0.128285	1.40634	0.159623	0.999721
ENSG00000146263	MMS22L	184.963	0.204849	0.145665	1.4063	0.159634	0.999721
ENSG00000130787	HIP1R	855.668	0.114681	0.0815876	1.40561	0.159839	0.999721
ENSG00000174371	EXO1	51.842	-0.345687	0.245974	-1.40538	0.159908	0.999721
ENSG00000183337	BCOR	621.694	-0.124879	0.0888655	-1.40526	0.159944	0.999721
ENSG00000170312	CDK1	190.391	-0.287951	0.204968	-1.40486	0.160064	0.999721
ENSG00000138834	MAPK8IP3	1550.08	0.164161	0.116872	1.40462	0.160133	0.999721
ENSG00000028528	SNX1	2072.51	-0.0884342	0.0629653	-1.40449	0.160172	0.999721
ENSG00000197506	SLC28A3	68.2133	-0.586484	0.41774	-1.40394	0.160335	0.999721
ENSG00000274487		86.3565	0.409254	0.291567	1.40364	0.160427	0.999721
ENSG00000240225	ZNF542P	223.824	0.168901	0.120332	1.40362	0.160433	0.999721
ENSG00000198015	MRPL42	722.965	-0.11733	0.0835934	-1.40358	0.160445	0.999721
ENSG00000117115	PADI2	1199.33	-0.244494	0.174231	-1.40327	0.160536	0.999721
ENSG00000175536	LIPT2	23.817	0.184773	0.131674	1.40326	0.160539	0.999721
ENSG00000172243	CLEC7A	1301.87	0.169286	0.120662	1.40298	0.160624	0.999721
ENSG00000136732	GYPC	9719.43	0.220592	0.157234	1.40296	0.16063	0.999721
ENSG00000085415	SEH1L	365.006	0.098042	0.0698929	1.40275	0.160692	0.999721
ENSG00000163832	ELP6	161.461	0.117468	0.0837541	1.40253	0.160756	0.999721
ENSG00000197256	KANK2	748.241	0.271563	0.193682	1.40211	0.160883	0.999721
ENSG00000112763	BTN2A1	796.023	0.0823561	0.0587385	1.40208	0.160892	0.999721
ENSG00000125384	PTGER2	843.934	-0.124739	0.0889825	-1.40183	0.160965	0.999721
ENSG00000146842	TMEM209	330.187	-0.116148	0.082855	-1.40182	0.160968	0.999721
ENSG00000176401	EID2B	47.8914	0.169131	0.120707	1.40117	0.161163	0.999721
ENSG00000116824	CD2	1502.96	-0.109373	0.0780582	-1.40117	0.161164	0.999721
ENSG00000147677	EIF3H	3923.62	-0.0955516	0.0682314	-1.40041	0.161392	0.999721
ENSG00000221994	ZNF630	31.2417	-0.22599	0.161404	-1.40015	0.161467	0.999721
ENSG00000204138	PHACTR4	493.006	-0.0951412	0.0679505	-1.40015	0.161467	0.999721
ENSG00000167863	ATP5PD	703.736	-0.119015	0.0850382	-1.39954	0.161651	0.999721
ENSG00000284292		23.2833	0.273273	0.195313	1.39915	0.161767	0.999721
ENSG00000114473	IQCG	72.2586	0.204473	0.146158	1.39899	0.161817	0.999721
ENSG00000165637	VDAC2	991.997	-0.0795604	0.0568762	-1.39884	0.161862	0.999721
ENSG00000228867	NRM	205.068	-0.183628	0.131277	-1.39879	0.161877	0.999721
ENSG00000087460	GNAS	13296.9	0.150911	0.107929	1.39824	0.162041	0.999721
ENSG00000127528	KLF2	6495.61	-0.162357	0.116144	-1.39789	0.162145	0.999721
ENSG00000127419	TMEM175	510.378	0.133156	0.0952815	1.3975	0.162263	0.999721
ENSG00000181938	GINS3	66.9635	-0.133591	0.0955942	-1.39748	0.162271	0.999721
ENSG00000163138	PACRGL	83.4746	0.247382	0.177065	1.39712	0.162377	0.999721
ENSG00000262334	RPH3AL	18.2074	-0.415511	0.297433	-1.39699	0.162418	0.999721
ENSG00000124490	CRISP2	25.4353	-0.382188	0.273626	-1.39675	0.162488	0.999721
ENSG00000053524	MCF2L2	18.4892	0.437988	0.313745	1.396	0.162714	0.999721
ENSG00000163607	GTPBP8	218.665	-0.120936	0.0866486	-1.3957	0.162804	0.999721
ENSG00000147155	EBP	154.342	-0.143858	0.103075	-1.39567	0.162813	0.999721
ENSG00000251474	RPL32P3	236.365	0.213774	0.15319	1.39548	0.162871	0.999721
ENSG00000185808	PIGP	127.784	-0.170089	0.121901	-1.3953	0.162926	0.999721
ENSG00000147036	LANCL3	63.685	0.262867	0.188422	1.3951	0.162987	0.999721
ENSG00000280787	HERC2P2	916.288	0.563718	0.404527	1.39353	0.163461	0.999721
ENSG00000229358	DPY19L1P1	36.1363	-0.242498	0.174029	-1.39343	0.163489	0.999721
ENSG00000166016	ABTB2	46.8347	0.16952	0.121691	1.39304	0.163609	0.999721
ENSG00000008256	CYTH3	245.581	0.134279	0.0963942	1.39302	0.163613	0.999721
ENSG00000183960	KCNH8	25.6784	0.25633	0.18404	1.39279	0.163683	0.999721
ENSG00000114541	FRMD4B	241.278	0.18058	0.12968	1.3925	0.16377	0.999721
ENSG00000154734	ADAMTS1	24.0513	-0.351705	0.252623	-1.39221	0.163857	0.999721
ENSG00000248334	WHAMMP2	48.0444	-0.255762	0.183757	-1.39185	0.163969	0.999721
ENSG00000168301	KCTD6	137.832	-0.0858968	0.0617173	-1.39178	0.163989	0.999721
ENSG00000268350	FAM156A	527.986	0.140356	0.100874	1.3914	0.164103	0.999721
ENSG00000205534	SMG1P2	186.026	-0.240868	0.173114	-1.39138	0.164109	0.999721
ENSG00000029534	ANK1	6066.45	0.291008	0.20918	1.39119	0.164169	0.999721
ENSG00000066697	MSANTD3	90.082	0.11088	0.0797107	1.39103	0.164215	0.999721
ENSG00000100554	ATP6V1D	1819.5	0.213143	0.153257	1.39075	0.1643	0.999721
ENSG00000125730	C3	46.9175	-0.255913	0.184024	-1.39065	0.164333	0.999721
ENSG00000125257	ABCC4	717.401	0.250424	0.180129	1.39025	0.164453	0.999721
ENSG00000174444	RPL4	25482.8	-0.0962422	0.0692296	-1.39019	0.164472	0.999721
ENSG00000178026	LRRC75B	16.3842	0.322388	0.231916	1.39011	0.164497	0.999721
ENSG00000166704	ZNF606	220.62	0.137757	0.0991023	1.39005	0.164515	0.999721
ENSG00000172059	KLF11	445.465	0.134526	0.096809	1.38961	0.164649	0.999721
ENSG00000147408	CSGALNACT1	951.345	-0.134594	0.0968984	-1.38903	0.164825	0.999721
ENSG00000116199	FAM20B	1306.83	0.191123	0.137626	1.38871	0.16492	0.999721
ENSG00000189068	VSTM1	70.5317	-0.387165	0.278805	-1.38866	0.164936	0.999721
ENSG00000089876	DHX32	197.427	0.1265	0.0911256	1.38819	0.16508	0.999721
ENSG00000104765	BNIP3L	32502.4	0.261894	0.18867	1.3881	0.165105	0.999721
ENSG00000221909	FAM200A	107.111	-0.119144	0.0858353	-1.38806	0.165119	0.999721
ENSG00000140265	ZSCAN29	457.07	0.106223	0.0765447	1.38773	0.16522	0.999721
ENSG00000162738	VANGL2	28.7524	-0.278856	0.20103	-1.38714	0.1654	0.999721
ENSG00000166444	ST5	25.2087	0.322312	0.232445	1.38662	0.165559	0.999721
ENSG00000167397	VKORC1	258.601	-0.146379	0.105579	-1.38644	0.165613	0.999721
ENSG00000130052	STARD8	122.804	0.124426	0.0897635	1.38615	0.165701	0.999721
ENSG00000105723	GSK3A	1038.91	0.105324	0.075989	1.38605	0.165733	0.999721
ENSG00000186787	SPIN2B	101.75	-0.108525	0.0783324	-1.38545	0.165916	0.999721
ENSG00000120925	RNF170	235.778	0.137138	0.0990005	1.38523	0.165983	0.999721
ENSG00000169926	KLF13	3693.49	-0.23526	0.16985	-1.3851	0.166021	0.999721
ENSG00000004809	SLC22A16	111.064	-0.205398	0.148293	-1.38508	0.166028	0.999721
ENSG00000026652	AGPAT4	508.747	0.194957	0.140773	1.38491	0.16608	0.999721
ENSG00000133246	PRAM1	1345.93	-0.190403	0.137495	-1.38479	0.166116	0.999721
ENSG00000093217	XYLB	32.4116	-0.294231	0.212486	-1.38471	0.166141	0.999721
ENSG00000197520	FAM177B	32.2891	0.291184	0.210289	1.38468	0.166149	0.999721
ENSG00000141293	SKAP1	820.636	-0.132328	0.0955861	-1.38439	0.166239	0.999721
ENSG00000101474	APMAP	2234.9	-0.157354	0.113716	-1.38375	0.166435	0.999721
ENSG00000174996	KLC2	225.173	0.220398	0.159336	1.38323	0.166595	0.999721
ENSG00000135426	TESPA1	1629.65	-0.142445	0.10306	-1.38216	0.166923	0.999721
ENSG00000143401	ANP32E	1371.88	-0.109222	0.0790943	-1.38091	0.167307	0.999721
ENSG00000179862	CITED4	170.94	-0.229511	0.166295	-1.38015	0.167542	0.999721
ENSG00000169490	TM2D2	209.969	-0.107824	0.0781941	-1.37893	0.167917	0.999721
ENSG00000211638	IGLV8-61	8.54194	-0.306519	0.222301	-1.37885	0.167942	0.999721
ENSG00000121966	CXCR4	5706.56	-0.113813	0.08256	-1.37855	0.168034	0.999721
ENSG00000152404	CWF19L2	277.322	-0.110304	0.0800268	-1.37834	0.168098	0.999721
ENSG00000148734	NPFFR1	10.2505	-0.251855	0.182732	-1.37827	0.168119	0.999721
ENSG00000211805	TRAV24	14.6859	-0.262384	0.190385	-1.37818	0.168148	0.999721
ENSG00000197013	ZNF429	106.355	-0.168353	0.122231	-1.37733	0.16841	0.999721
ENSG00000155962	CLIC2	794.862	0.273	0.198238	1.37713	0.168471	0.999721
ENSG00000086967	MYBPC2	11.3876	-0.373335	0.271163	-1.37679	0.168577	0.999721
ENSG00000137269	LRRC1	56.9259	-0.174602	0.126842	-1.37653	0.168657	0.999721
ENSG00000006451	RALA	589.803	-0.0968292	0.0703525	-1.37634	0.168715	0.999721
ENSG00000185798	WDR53	138.026	-0.194228	0.141161	-1.37593	0.168845	0.999721
ENSG00000154217	PITPNC1	1006.92	-0.0994917	0.0723294	-1.37554	0.168965	0.999721
ENSG00000164691	TAGAP	3922.08	-0.102179	0.0742905	-1.3754	0.169007	0.999721
ENSG00000124172	ATP5F1E	4251.38	0.220337	0.160206	1.37534	0.169026	0.999721
ENSG00000174721	FGFBP3	30.6151	0.195577	0.142252	1.37486	0.169176	0.999721
ENSG00000196872	KIAA1211L	27.6311	-0.276052	0.200855	-1.37439	0.169322	0.999721
ENSG00000224940	PRRT4	62.0208	-0.331885	0.241585	-1.37378	0.16951	0.999721
ENSG00000124613	ZNF391	32.265	-0.321655	0.234139	-1.37378	0.169511	0.999721
ENSG00000181061	HIGD1A	1423.17	0.195774	0.14251	1.37376	0.169516	0.999721
ENSG00000069329	VPS35	1750.81	-0.124757	0.0908588	-1.37308	0.169726	0.999721
ENSG00000156508	EEF1A1	212935	-0.0973118	0.0708844	-1.37282	0.169807	0.999721
ENSG00000162241	SLC25A45	528.214	0.150548	0.109694	1.37244	0.169927	0.999721
ENSG00000144560	VGLL4	674.061	-0.0824609	0.0600843	-1.37242	0.169932	0.999721
ENSG00000103248	MTHFSD	260.519	0.112281	0.0818218	1.37226	0.169983	0.999721
ENSG00000182379	NXPH4	11.9737	0.308228	0.224622	1.3722	0.17	0.999721
ENSG00000074266	EED	211.408	-0.102892	0.0749838	-1.3722	0.170002	0.999721
ENSG00000040275	SPDL1	195.587	-0.1659	0.120915	-1.37205	0.170049	0.999721
ENSG00000165886	UBTD1	87.2616	-0.230286	0.167853	-1.37195	0.170079	0.999721
ENSG00000158528	PPP1R9A	35.1462	0.247916	0.18071	1.3719	0.170095	0.999721
ENSG00000258643	BCL2L2-PABPN1	46.9586	0.338733	0.246929	1.37179	0.17013	0.999721
ENSG00000169495	HTRA4	17.7816	-0.272762	0.19884	-1.37177	0.170136	0.999721
ENSG00000104361	NIPAL2	264.491	-0.257545	0.187805	-1.37134	0.170268	0.999721
ENSG00000161542	PRPSAP1	395.707	-0.114126	0.0832264	-1.37128	0.170289	0.999721
ENSG00000074657	ZNF532	99.9381	0.227114	0.16566	1.37096	0.170387	0.999721
ENSG00000116044	NFE2L2	968.557	-0.0891034	0.0650197	-1.3704	0.170561	0.999721
ENSG00000180979	LRRC57	269.707	0.131897	0.0962931	1.36975	0.170766	0.999721
ENSG00000197948	FCHSD1	516.872	0.125901	0.0919261	1.36959	0.170815	0.999721
ENSG00000179909	ZNF154	418.63	0.202836	0.14818	1.36886	0.171044	0.999721
ENSG00000152782	PANK1	73.7867	-0.267178	0.195204	-1.36871	0.171089	0.999721
ENSG00000171552	BCL2L1	35857.7	0.269169	0.19667	1.36863	0.171115	0.999721
ENSG00000139679	LPAR6	1126.33	-0.10683	0.0780673	-1.36843	0.171177	0.999721
ENSG00000102445	RUBCNL	566.682	0.161588	0.118086	1.36839	0.171191	0.999721
ENSG00000197852	INKA2	248.571	0.24199	0.176851	1.36833	0.171209	0.999721
ENSG00000063245	EPN1	1016.31	0.142726	0.104342	1.36786	0.171355	0.999721
ENSG00000140057	AK7	48.2364	0.301723	0.220588	1.36781	0.171372	0.999721
ENSG00000089289	IGBP1	1043.71	-0.0987179	0.0721734	-1.36779	0.171378	0.999721
ENSG00000145779	TNFAIP8	2787.86	-0.0910046	0.066535	-1.36777	0.171384	0.999721
ENSG00000153130	SCOC	431.16	-0.109906	0.0803563	-1.36773	0.171396	0.999721
ENSG00000090238	YPEL3	4204.29	0.202692	0.148202	1.36768	0.171414	0.999721
ENSG00000177981	ASB8	619.095	0.0963687	0.0704617	1.36767	0.171414	0.999721
ENSG00000198821	CD247	2525.36	-0.0898868	0.0657292	-1.36753	0.171459	0.999721
ENSG00000189067	LITAF	3766.37	-0.155105	0.113468	-1.36695	0.171641	0.999721
ENSG00000179598	PLD6	90.4278	-0.192997	0.141192	-1.36691	0.171653	0.999721
ENSG00000111540	RAB5B	2511.23	-0.073082	0.0534941	-1.36617	0.171886	0.999721
ENSG00000142794	NBPF3	114.734	0.232821	0.170475	1.36572	0.172028	0.999721
ENSG00000162614	NEXN	57.2061	0.278864	0.20422	1.36551	0.172093	0.999721
ENSG00000175544	CABP4	10.0622	-0.327535	0.239879	-1.36542	0.172122	0.999721
ENSG00000105647	PIK3R2	918.348	0.175449	0.128507	1.36528	0.172164	0.999721
ENSG00000160299	PCNT	1438.2	0.149743	0.109713	1.36486	0.172298	0.999721
ENSG00000229314	ORM1	441.057	-0.308917	0.226385	-1.36457	0.17239	0.999721
ENSG00000067334	DNTTIP2	928.138	-0.150416	0.11025	-1.36432	0.172468	0.999721
ENSG00000196290	NIF3L1	227.209	-0.0804037	0.0589426	-1.3641	0.172535	0.999721
ENSG00000226660	TRBV2	86.8787	-0.174527	0.128006	-1.36343	0.172748	0.999721
ENSG00000175220	ARHGAP1	1029.45	-0.0736807	0.0540415	-1.36341	0.172754	0.999721
ENSG00000277751	LILRB2	496.614	-0.266175	0.195247	-1.36328	0.172795	0.999721
ENSG00000248592	TMEM110-MUSTN1	214.434	0.229368	0.168253	1.36324	0.172808	0.999721
ENSG00000197461	PDGFA	17.5174	0.277836	0.203861	1.36287	0.172923	0.999721
ENSG00000128266	GNAZ	64.4338	0.245251	0.179969	1.36274	0.172965	0.999721
ENSG00000135317	SNX14	1157.7	-0.174182	0.127841	-1.36249	0.173043	0.999721
ENSG00000117632	STMN1	1151.18	-0.120752	0.0886314	-1.36241	0.173068	0.999721
ENSG00000102349	KLF8	95.3428	0.242777	0.178287	1.36172	0.173288	0.999721
ENSG00000082781	ITGB5	46.4911	0.279341	0.205281	1.36078	0.173584	0.999721
ENSG00000211584	SLC48A1	220.891	0.132285	0.0972327	1.3605	0.173671	0.999721
ENSG00000130821	SLC6A8	2896.68	0.270506	0.19886	1.36029	0.173739	0.999721
ENSG00000133104	SPART	504.014	-0.158581	0.116612	-1.3599	0.173862	0.999721
ENSG00000211898	IGHD	1314.02	0.157325	0.11569	1.35988	0.173867	0.999721
ENSG00000100591	AHSA1	1060.37	-0.165587	0.12177	-1.35984	0.173882	0.999721
ENSG00000171763	SPATA5L1	119.742	0.13302	0.0978227	1.35981	0.17389	0.999721
ENSG00000101294	HM13	1146.65	-0.13756	0.101205	-1.35923	0.174073	0.999721
ENSG00000081087	OSTM1	824.331	-0.112042	0.082485	-1.35833	0.174357	0.999721
ENSG00000137168	PPIL1	167.81	-0.111166	0.0818574	-1.35805	0.174448	0.999721
ENSG00000159713	TPPP3	187.112	-0.293908	0.216458	-1.35781	0.174525	0.999721
ENSG00000147168	IL2RG	4131.99	-0.0976305	0.0719055	-1.35776	0.17454	0.999721
ENSG00000261371	PECAM1	5418.1	-0.15805	0.116428	-1.35749	0.174625	0.999721
ENSG00000123091	RNF11	10331.6	0.268805	0.198056	1.35722	0.174712	0.999721
ENSG00000176230	OR4K17	9.57132	0.250289	0.184468	1.35682	0.17484	0.999721
ENSG00000111674	ENO2	176.483	0.160264	0.118118	1.35681	0.174841	0.999721
ENSG00000140368	PSTPIP1	1159.54	-0.177397	0.130758	-1.35668	0.174883	0.999721
ENSG00000184203	PPP1R2	1623.98	-0.0896782	0.0661248	-1.3562	0.175037	0.999721
ENSG00000177455	CD19	469.304	0.15341	0.113136	1.35598	0.175104	0.999721
ENSG00000157322	CLEC18A	12.4277	0.350482	0.258544	1.3556	0.175226	0.999721
ENSG00000036054	TBC1D23	727.247	-0.0985174	0.0726991	-1.35514	0.175373	0.999721
ENSG00000050130	JKAMP	532.393	-0.0701681	0.0517895	-1.35487	0.175459	0.999721
ENSG00000169223	LMAN2	1149.84	-0.121023	0.0893265	-1.35484	0.175469	0.999721
ENSG00000159267	HLCS	166.247	0.147501	0.108874	1.35478	0.175487	0.999721
ENSG00000070371	CLTCL1	248.628	-0.267271	0.197294	-1.35469	0.175517	0.999721
ENSG00000105220	GPI	2072.22	-0.154209	0.113869	-1.35426	0.175653	0.999721
ENSG00000104177	MYEF2	187.163	0.221179	0.163338	1.35412	0.175698	0.999721
ENSG00000176171	BNIP3	279.429	0.146761	0.108389	1.35403	0.175728	0.999721
ENSG00000110852	CLEC2B	652.686	-0.109469	0.0808536	-1.35392	0.175762	0.999721
ENSG00000163608	NEPRO	667.983	0.13744	0.101518	1.35386	0.175782	0.999721
ENSG00000101162	TUBB1	993.145	0.246693	0.182314	1.35312	0.176016	0.999721
ENSG00000198860	TSEN15	469.844	-0.0822361	0.06078	-1.35301	0.176052	0.999721
ENSG00000116791	CRYZ	246.099	-0.174504	0.128975	-1.353	0.176055	0.999721
ENSG00000144233	AMMECR1L	593.676	0.0920131	0.0680142	1.35285	0.176103	0.999721
ENSG00000081377	CDC14B	75.2911	0.280739	0.207543	1.35268	0.176158	0.999721
ENSG00000161980	POLR3K	132.045	0.109959	0.0812904	1.35267	0.176161	0.999721
ENSG00000061936	SFSWAP	878.534	0.0715278	0.0528811	1.35262	0.176179	0.999721
ENSG00000145495	43165	2679.41	0.117485	0.0868654	1.35249	0.176218	0.999721
ENSG00000147166	ITGB1BP2	14.6483	0.285222	0.210902	1.35239	0.17625	0.999721
ENSG00000146826	C7orf43	596.698	0.126212	0.0933404	1.35217	0.176322	0.999721
ENSG00000031691	CENPQ	84.8654	-0.14965	0.110697	-1.35189	0.176411	0.999721
ENSG00000152763	WDR78	31.2413	-0.406306	0.300576	-1.35176	0.176453	0.999721
ENSG00000158457	TSPAN33	219.917	0.206751	0.152952	1.35173	0.17646	0.999721
ENSG00000056050	HPF1	189.13	-0.1195	0.0884171	-1.35155	0.176519	0.999721
ENSG00000106692	FKTN	208.751	0.241218	0.1785	1.35136	0.17658	0.999721
ENSG00000154359	LONRF1	40.558	0.25226	0.186689	1.35123	0.176621	0.999721
ENSG00000184678	HIST2H2BE	279.508	0.154863	0.11463	1.35099	0.1767	0.999721
ENSG00000164309	CMYA5	17.7864	-0.395147	0.292537	-1.35076	0.176773	0.999721
ENSG00000107104	KANK1	65.8936	-0.311416	0.230677	-1.35001	0.177014	0.999721
ENSG00000184785	SMIM10	16.7785	-0.271988	0.20149	-1.34988	0.177054	0.999721
ENSG00000214226	C17orf67	53.0166	-0.277135	0.205319	-1.34978	0.177087	0.999721
ENSG00000135439	AGAP2	874.574	-0.0808453	0.0599246	-1.34912	0.177299	0.999721
ENSG00000274180	NATD1	2558.6	0.233931	0.173438	1.34878	0.177406	0.999721
ENSG00000196220	SRGAP3	98.3627	-0.280788	0.208182	-1.34876	0.177414	0.999721
ENSG00000185883	ATP6V0C	4337.59	0.203731	0.151056	1.34872	0.177427	0.999721
ENSG00000177096	PHETA2	44.8467	0.188845	0.140036	1.34854	0.177484	0.999721
ENSG00000219481	NBPF1	299.179	0.14637	0.108545	1.34848	0.177505	0.999721
ENSG00000133069	TMCC2	20522.9	0.257751	0.191142	1.34847	0.177506	0.999721
ENSG00000088256	GNA11	129.996	-0.210443	0.156071	-1.34839	0.177534	0.999721
ENSG00000149591	TAGLN	151.127	0.22159	0.164427	1.34765	0.177772	0.999721
ENSG00000113369	ARRDC3	2385.87	-0.129799	0.0963715	-1.34686	0.178025	0.999721
ENSG00000130518	IQCN	138.184	0.244531	0.181568	1.34677	0.178055	0.999721
ENSG00000004142	POLDIP2	733.688	0.106162	0.0788308	1.34671	0.178075	0.999721
ENSG00000154719	MRPL39	136.044	-0.118443	0.0879558	-1.34662	0.178101	0.999721
ENSG00000100225	FBXO7	23109.4	0.257956	0.191583	1.34645	0.178159	0.999721
ENSG00000117592	PRDX6	3052.2	0.179598	0.133439	1.34591	0.17833	0.999721
ENSG00000091513	TF	589.246	0.396717	0.294927	1.34514	0.17858	0.999721
ENSG00000128699	ORMDL1	1314.99	0.106282	0.0790237	1.34494	0.178644	0.999721
ENSG00000109819	PPARGC1A	61.5714	-0.391022	0.290755	-1.34485	0.178675	0.999721
ENSG00000159314	ARHGAP27	1280.83	0.180719	0.134398	1.34465	0.178738	0.999721
ENSG00000198208	RPS6KL1	18.6132	0.284916	0.211958	1.34421	0.178879	0.999721
ENSG00000085733	CTTN	129.727	0.244349	0.181871	1.34353	0.179101	0.999721
ENSG00000143851	PTPN7	774.989	-0.0881176	0.0655925	-1.34341	0.179139	0.999721
ENSG00000183530	PRR14L	833.636	-0.130968	0.0974977	-1.34329	0.179177	0.999721
ENSG00000085644	ZNF213	231.217	0.111404	0.0829343	1.34328	0.179181	0.999721
ENSG00000044459	CNTLN	119.967	-0.158923	0.118357	-1.34274	0.179355	0.999721
ENSG00000176014	TUBB6	304.633	0.155184	0.115587	1.34257	0.179412	0.999721
ENSG00000227051	C14orf132	13.8429	0.304419	0.226781	1.34235	0.179482	0.999721
ENSG00000154122	ANKH	2067.58	0.236722	0.176395	1.342	0.179596	0.999721
ENSG00000135540	NHSL1	22.7737	-0.30802	0.229575	-1.3417	0.179694	0.999721
ENSG00000082293	COL19A1	95.8927	0.189965	0.141586	1.3417	0.179695	0.999721
ENSG00000077721	UBE2A	792.151	-0.0700354	0.0522114	-1.34138	0.179797	0.999721
ENSG00000269335	IKBKG	581.649	0.117157	0.0873444	1.34133	0.179814	0.999721
ENSG00000132471	WBP2	4581.07	0.17481	0.130374	1.34084	0.179973	0.999721
ENSG00000163006	CCDC138	71.1848	-0.184266	0.137449	-1.34062	0.180045	0.999721
ENSG00000131374	TBC1D5	1033.07	-0.136844	0.102079	-1.34058	0.180058	0.999721
ENSG00000223547	ZNF844	247.573	-0.12787	0.0953895	-1.3405	0.180082	0.999721
ENSG00000175265	GOLGA8A	2083.44	0.212924	0.158848	1.34043	0.180106	0.999721
ENSG00000099194	SCD	482.34	-0.156854	0.11706	-1.33994	0.180263	0.999721
ENSG00000142611	PRDM16	34.189	0.321986	0.240447	1.33911	0.180534	0.999721
ENSG00000032742	IFT88	157.785	0.128036	0.0956132	1.33911	0.180535	0.999721
ENSG00000087995	METTL2A	132.687	0.125306	0.0936126	1.33856	0.180713	0.999721
ENSG00000138760	SCARB2	830.013	-0.10585	0.0790837	-1.33845	0.180749	0.999721
ENSG00000160293	VAV2	327.029	0.142446	0.106426	1.33845	0.180749	0.999721
ENSG00000125459	MSTO1	296.578	0.15579	0.116443	1.33791	0.180924	0.999721
ENSG00000143228	NUF2	110.885	-0.218373	0.163264	-1.33754	0.181046	0.999721
ENSG00000177169	ULK1	1362.92	0.141222	0.105588	1.33749	0.181063	0.999721
ENSG00000186081	KRT5	10.7455	-0.343387	0.256786	-1.33725	0.181141	0.999721
ENSG00000211806	TRAV25	21.4671	-0.224196	0.167722	-1.33671	0.181317	0.999721
ENSG00000114670	NEK11	23.1869	0.238919	0.178741	1.33668	0.181328	0.999721
ENSG00000167105	TMEM92	23.9124	-0.457288	0.342125	-1.33661	0.18135	0.999721
ENSG00000169155	ZBTB43	348.597	0.198895	0.148816	1.33652	0.18138	0.999721
ENSG00000171121	KCNMB3	26.1287	0.248305	0.185793	1.33646	0.181398	0.999721
ENSG00000285369		127.931	0.208432	0.155966	1.33639	0.181421	0.999721
ENSG00000116991	SIPA1L2	195.699	-0.166954	0.124929	-1.33639	0.181422	0.999721
ENSG00000008282	SYPL1	840.92	-0.117921	0.0882481	-1.33625	0.181468	0.999721
ENSG00000147437	GNRH1	24.0596	0.289113	0.216366	1.33622	0.181477	0.999721
ENSG00000196502	SULT1A1	662.919	-0.249462	0.186701	-1.33616	0.181497	0.999721
ENSG00000008441	NFIX	1750.97	0.239305	0.179207	1.33536	0.181758	0.999721
ENSG00000140350	ANP32A	2451.51	-0.0812283	0.0608418	-1.33507	0.181852	0.999721
ENSG00000187097	ENTPD5	370.164	0.203981	0.152788	1.33506	0.181858	0.999721
ENSG00000143393	PI4KB	1273.65	0.0685758	0.051374	1.33483	0.181931	0.999721
ENSG00000080802	CNOT4	379.833	-0.121878	0.0913165	-1.33468	0.181982	0.999721
ENSG00000168734	PKIG	125.854	0.14723	0.110315	1.33464	0.181994	0.999721
ENSG00000169976	SF3B5	610.837	-0.190782	0.142974	-1.33438	0.182079	0.999721
ENSG00000150347	ARID5B	603.453	-0.132063	0.098976	-1.33429	0.182109	0.999721
ENSG00000126775	ATG14	861.887	0.229935	0.172385	1.33384	0.182255	0.999721
ENSG00000198435	NRARP	12.6663	0.316349	0.23718	1.33379	0.182272	0.999721
ENSG00000166947	EPB42	9195.2	0.243561	0.182614	1.33375	0.182285	0.999721
ENSG00000124191	TOX2	82.4051	-0.192295	0.144186	-1.33366	0.182316	0.999721
ENSG00000278828	HIST1H3H	99.1817	0.249062	0.186758	1.33361	0.182332	0.999721
ENSG00000100307	CBX7	537.421	0.111774	0.0838259	1.33341	0.182398	0.999721
ENSG00000067992	PDK3	197.654	-0.114947	0.0862245	-1.33311	0.182496	0.999721
ENSG00000150760	DOCK1	23.9519	-0.33785	0.253431	-1.33311	0.182497	0.999721
ENSG00000141380	SS18	977.284	0.112454	0.0843823	1.33267	0.18264	0.999721
ENSG00000269313	MAGIX	23.0212	-0.383088	0.287479	-1.33258	0.182671	0.999721
ENSG00000148057	IDNK	76.6557	0.139469	0.104672	1.33244	0.182715	0.999721
ENSG00000143612	C1orf43	1464.11	-0.0811182	0.0608879	-1.33226	0.182776	0.999721
ENSG00000158092	NCK1	597.543	-0.109119	0.0819139	-1.33212	0.182821	0.999721
ENSG00000198270	TMEM116	98.1929	0.16519	0.12402	1.33196	0.182874	0.999721
ENSG00000198755	RPL10A	10891.5	-0.132416	0.0994291	-1.33176	0.182938	0.999721
ENSG00000112144	ICK	503.759	-0.0893124	0.067089	-1.33125	0.183106	0.999721
ENSG00000170915	PAQR8	711.762	-0.112896	0.0848064	-1.33122	0.183116	0.999721
ENSG00000145604	SKP2	249.414	-0.0734375	0.0551716	-1.33107	0.183165	0.999721
ENSG00000116752	BCAS2	329.777	-0.107893	0.0810737	-1.33081	0.183253	0.999721
ENSG00000182809	CRIP2	62.5312	-0.308327	0.231747	-1.33045	0.18337	0.999721
ENSG00000110060	PUS3	150.577	0.134961	0.101501	1.32965	0.183633	0.999721
ENSG00000130363	RSPH3	96.6405	-0.164589	0.123792	-1.32957	0.183661	0.999721
ENSG00000184178	SCFD2	156.928	0.109962	0.082709	1.32951	0.18368	0.999721
ENSG00000158669	GPAT4	1127.66	0.0823922	0.0619725	1.3295	0.183685	0.999721
ENSG00000185651	UBE2L3	1229.71	-0.0911525	0.0685713	-1.32931	0.183746	0.999721
ENSG00000168887	C2orf68	636.478	0.0652517	0.0491013	1.32892	0.183874	0.999721
ENSG00000134597	RBMX2	270.904	-0.140236	0.105544	-1.3287	0.183946	0.999721
ENSG00000182774	RPS17	1387.3	-0.306974	0.23104	-1.32866	0.183959	0.999721
ENSG00000276849	TRBC2	3521.45	-0.16058	0.120863	-1.32861	0.183978	0.999721
ENSG00000142655	PEX14	141.615	0.109688	0.0826485	1.32717	0.184454	0.999721
ENSG00000084073	ZMPSTE24	611.901	-0.121605	0.0916297	-1.32714	0.184463	0.999721
ENSG00000276336	SCARF1	91.3267	0.174152	0.13128	1.32656	0.184653	0.999721
ENSG00000167106	FAM102A	2672.6	-0.121771	0.0918001	-1.32647	0.184683	0.999721
ENSG00000131067	GGT7	249.763	0.179625	0.135427	1.32636	0.184719	0.999721
ENSG00000197976	AKAP17A	1863.49	0.093246	0.0703104	1.32621	0.184772	0.999721
ENSG00000100949	RABGGTA	272.423	0.114328	0.0862398	1.32569	0.184941	0.999721
ENSG00000105792	CFAP69	32.7931	0.249529	0.188298	1.32518	0.185112	0.999721
ENSG00000034677	RNF19A	2160.39	0.224505	0.169483	1.32465	0.185288	0.999721
ENSG00000006607	FARP2	198.567	0.200006	0.150994	1.3246	0.185304	0.999721
ENSG00000011566	MAP4K3	174.186	0.181516	0.137082	1.32414	0.185455	0.999721
ENSG00000236552	RPL13AP5	8.52967	-0.298733	0.225643	-1.32392	0.18553	0.999721
ENSG00000186591	UBE2H	10688	0.245749	0.185638	1.32381	0.185567	0.999721
ENSG00000188021	UBQLN2	587.859	-0.0812478	0.061408	-1.32308	0.185809	0.999721
ENSG00000206047	DEFA1	18005.3	-0.488907	0.369543	-1.323	0.185835	0.999721
ENSG00000174173	TRMT10C	246.622	-0.104209	0.0787738	-1.32289	0.185871	0.999721
ENSG00000070010	UFD1	733.552	0.118214	0.089373	1.32271	0.185933	0.999721
ENSG00000075785	RAB7A	3241.15	-0.0934329	0.0706414	-1.32264	0.185956	0.999721
ENSG00000167525	PROCA1	59.8091	0.197142	0.149057	1.32259	0.18597	0.999721
ENSG00000138663	COPS4	400.292	-0.0990063	0.0748819	-1.32217	0.186113	0.999721
ENSG00000274148	LILRA6	486.627	0.252301	0.190838	1.32207	0.186146	0.999721
ENSG00000253251	SHLD3	60.7203	0.167996	0.127073	1.32204	0.186154	0.999721
ENSG00000128886	ELL3	38.8528	0.251162	0.190024	1.32174	0.186256	0.999721
ENSG00000132005	RFX1	290.594	0.134592	0.101833	1.32169	0.18627	0.999721
ENSG00000050327	ARHGEF5	85.8476	0.1814	0.137276	1.32143	0.186359	0.999721
ENSG00000138326	RPS24	14345.6	-0.15074	0.114074	-1.32142	0.18636	0.999721
ENSG00000114850	SSR3	1180.77	-0.145511	0.11012	-1.32138	0.186374	0.999721
ENSG00000186395	KRT10	143.49	0.165416	0.125216	1.32105	0.186486	0.999721
ENSG00000150401	DCUN1D2	173.158	0.127102	0.0963415	1.31929	0.187073	0.999721
ENSG00000102978	POLR2C	482.801	0.0589527	0.0447258	1.31809	0.187473	0.999721
ENSG00000211799	TRAV19	52.4867	-0.221201	0.167844	-1.3179	0.187537	0.999721
ENSG00000171302	CANT1	562.199	-0.0942259	0.0715123	-1.31762	0.187632	0.999721
ENSG00000188130	MAPK12	55.2273	0.212967	0.161637	1.31756	0.18765	0.999721
ENSG00000232573	RPL3P4	34.0126	0.687992	0.522203	1.31748	0.187678	0.999721
ENSG00000186399	GOLGA8R	23.3865	0.309953	0.235268	1.31745	0.187689	0.999721
ENSG00000003096	KLHL13	15.0581	0.22328	0.169488	1.31738	0.187712	0.999721
ENSG00000178878	APOLD1	54.5901	0.288898	0.219338	1.31714	0.187792	0.999721
ENSG00000173209	AHSA2P	2197.08	0.160753	0.122096	1.31662	0.187966	0.999721
ENSG00000010270	STARD3NL	418.872	-0.115368	0.0876755	-1.31585	0.188225	0.999721
ENSG00000155755	TMEM237	67.3701	0.182527	0.138717	1.31582	0.188235	0.999721
ENSG00000174175	SELP	111.853	0.27052	0.205599	1.31577	0.188252	0.999721
ENSG00000258315	C17orf49	618.696	-0.176631	0.134291	-1.31529	0.188413	0.999721
ENSG00000165548	TMEM63C	76.1202	0.302878	0.23029	1.3152	0.188442	0.999721
ENSG00000145425	RPS3A	29328	-0.171771	0.130618	-1.31506	0.188488	0.999721
ENSG00000163281	GNPDA2	175.775	-0.10734	0.0816337	-1.31489	0.188545	0.999721
ENSG00000142546	NOSIP	1748.88	-0.164879	0.125426	-1.31455	0.188661	0.999721
ENSG00000170100	ZNF778	360.266	0.282701	0.215104	1.31426	0.18876	0.999721
ENSG00000108039	XPNPEP1	617.229	0.0928108	0.070619	1.31425	0.188763	0.999721
ENSG00000123329	ARHGAP9	2689.51	-0.110095	0.0837833	-1.31405	0.188829	0.999721
ENSG00000186654	PRR5	643.31	0.161864	0.123324	1.31251	0.189347	0.999721
ENSG00000169018	FEM1B	1361.36	-0.103699	0.0790091	-1.31249	0.189354	0.999721
ENSG00000196924	FLNA	16545.5	-0.179938	0.137115	-1.31232	0.189413	0.999721
ENSG00000284215		38.8704	0.349893	0.266728	1.3118	0.189589	0.999721
ENSG00000102007	PLP2	1660.4	-0.168869	0.128743	-1.31167	0.189631	0.999721
ENSG00000081307	UBA5	443.611	-0.129	0.0983497	-1.31165	0.189638	0.999721
ENSG00000090382	LYZ	69326.1	-0.191761	0.146241	-1.31127	0.189768	0.999721
ENSG00000233493	TMEM238	25.0233	-0.322796	0.246206	-1.31108	0.18983	0.999721
ENSG00000184677	ZBTB40	786.508	0.129983	0.099142	1.31108	0.189831	0.999721
ENSG00000189079	ARID2	498.383	-0.118138	0.0901118	-1.31101	0.189853	0.999721
ENSG00000065882	TBC1D1	1226.58	-0.135214	0.103161	-1.31071	0.189955	0.999721
ENSG00000165138	ANKS6	194.864	0.137103	0.104607	1.31065	0.189975	0.999721
ENSG00000162433	AK4	36.5914	-0.30036	0.229184	-1.31056	0.190007	0.999721
ENSG00000156928	MALSU1	162.409	-0.135863	0.103681	-1.31039	0.190063	0.999721
ENSG00000176623	RMDN1	485.706	0.105287	0.080362	1.31016	0.190143	0.999721
ENSG00000135624	CCT7	1970.98	-0.121425	0.0926827	-1.31011	0.190158	0.999721
ENSG00000181788	SIAH2	4335.66	0.234647	0.179164	1.30968	0.190305	0.999721
ENSG00000277791	PSMB3	945.383	-0.211662	0.161644	-1.30943	0.190388	0.999721
ENSG00000104497	SNX16	176.604	0.16478	0.125907	1.30874	0.190621	0.999721
ENSG00000175906	ARL4D	11.8946	0.263665	0.20152	1.30838	0.190743	0.999721
ENSG00000112578	BYSL	93.3151	0.11111	0.0849623	1.30776	0.190956	0.999721
ENSG00000204179	PTPN20	18.5775	0.315233	0.241107	1.30744	0.191062	0.999721
ENSG00000185245	GP1BA	43.6194	0.349825	0.267599	1.30727	0.19112	0.999721
ENSG00000157734	SNX22	343.143	0.140297	0.107369	1.30669	0.191318	0.999721
ENSG00000147874	HAUS6	490.176	0.130155	0.0996097	1.30665	0.191332	0.999721
ENSG00000157954	WIPI2	2091.31	0.115323	0.0882674	1.30652	0.191376	0.999721
ENSG00000113593	PPWD1	827.236	-0.111565	0.0853927	-1.3065	0.191384	0.999721
ENSG00000163482	STK36	187.792	0.181839	0.139214	1.30618	0.191492	0.999721
ENSG00000081041	CXCL2	23.9065	0.412534	0.315876	1.306	0.191553	0.999721
ENSG00000088833	NSFL1C	777.403	0.0809226	0.0619648	1.30594	0.191572	0.999721
ENSG00000106327	TFR2	783.982	0.249336	0.190929	1.30591	0.191584	0.999721
ENSG00000273686	B2M	14693.8	-0.134127	0.102723	-1.30572	0.191648	0.999721
ENSG00000163599	CTLA4	83.1386	0.304687	0.233403	1.30541	0.191753	0.999721
ENSG00000162086	ZNF75A	383.817	0.126112	0.0966951	1.30422	0.192159	0.999721
ENSG00000126461	SCAF1	577.594	0.086789	0.0665589	1.30394	0.192253	0.999721
ENSG00000198246	SLC29A3	109.072	-0.13244	0.101599	-1.30355	0.192388	0.999721
ENSG00000156475	PPP2R2B	51.8257	-0.211924	0.162614	-1.30323	0.192496	0.999721
ENSG00000211801	TRAV21	61.7158	-0.204324	0.156846	-1.30271	0.192675	0.999721
ENSG00000163945	UVSSA	543.314	0.131617	0.101077	1.30215	0.192865	0.999721
ENSG00000120699	EXOSC8	387.364	-0.114871	0.0882357	-1.30186	0.192964	0.999721
ENSG00000126749		275.12	0.129594	0.0996276	1.30078	0.193333	0.999721
ENSG00000148120	C9orf3	66.2607	0.172086	0.132312	1.30061	0.193392	0.999721
ENSG00000185862	EVI2B	6073.03	-0.155223	0.119391	-1.30012	0.193559	0.999721
ENSG00000182484	WASH6P	690.273	0.187555	0.144327	1.29951	0.193768	0.999721
ENSG00000186834	HEXIM1	1361.04	0.146599	0.11283	1.29929	0.193844	0.999721
ENSG00000183597	TANGO2	1826.28	0.176703	0.136046	1.29885	0.193996	0.999721
ENSG00000176542	USF3	823.549	0.182961	0.140909	1.29843	0.194138	0.999721
ENSG00000121552	CSTA	699.128	-0.216248	0.166596	-1.29804	0.194272	0.999721
ENSG00000189283	FHIT	430.776	-0.196243	0.151215	-1.29777	0.194367	0.999721
ENSG00000068354	TBC1D25	499.741	0.163622	0.126091	1.29765	0.194408	0.999721
ENSG00000162836	ACP6	178.401	-0.174809	0.134735	-1.29742	0.194486	0.999721
ENSG00000280518		163.72	0.460409	0.354947	1.29712	0.19459	0.999721
ENSG00000136261	BZW2	681.841	-0.112538	0.0867843	-1.29676	0.194715	0.999721
ENSG00000198876	DCAF12	22117.6	0.258223	0.199132	1.29675	0.194718	0.999721
ENSG00000182195	LDOC1	24.9869	-0.212395	0.163806	-1.29663	0.194759	0.999721
ENSG00000152926	ZNF117	272.753	0.152881	0.117945	1.2962	0.194905	0.999721
ENSG00000113555	PCDH12	32.3267	-0.327422	0.25267	-1.29585	0.195028	0.999721
ENSG00000187037	GPR141	201.97	-0.207598	0.160205	-1.29583	0.195035	0.999721
ENSG00000070610	GBA2	950.298	0.0956108	0.0738004	1.29553	0.195137	0.999721
ENSG00000260314	MRC1	29.3944	-0.31526	0.243399	-1.29524	0.195238	0.999721
ENSG00000103197	TSC2	1219.67	0.139071	0.107413	1.29473	0.195413	0.999721
ENSG00000163875	MEAF6	655.499	-0.0686778	0.0530441	-1.29473	0.195413	0.999721
ENSG00000159259	CHAF1B	67.0873	-0.161891	0.125057	-1.29453	0.195481	0.999721
ENSG00000105376	ICAM5	26.0451	0.309894	0.239466	1.29411	0.195628	0.999721
ENSG00000129757	CDKN1C	94.8483	0.27882	0.21556	1.29347	0.19585	0.999721
ENSG00000100029	PES1	457.87	-0.0842705	0.065152	-1.29345	0.195857	0.999721
ENSG00000185219	ZNF445	608.828	0.147658	0.114167	1.29335	0.195891	0.999721
ENSG00000115758	ODC1	2574.08	0.180328	0.139445	1.29318	0.195948	0.999721
ENSG00000113318	MSH3	253.497	-0.148074	0.114536	-1.29281	0.196075	0.999721
ENSG00000214113	LYRM4	246.078	-0.163907	0.126804	-1.2926	0.196148	0.999721
ENSG00000075884	ARHGAP15	1173.75	-0.0848617	0.0656725	-1.29219	0.19629	0.999721
ENSG00000204628	RACK1	15568.1	-0.115369	0.089309	-1.2918	0.196428	0.999721
ENSG00000124257	NEURL2	10.931	0.250162	0.193674	1.29167	0.196473	0.999721
ENSG00000178093	TSSK6	22.864	0.252705	0.195651	1.29161	0.196492	0.999721
ENSG00000205133	TRIQK	424.184	-0.182455	0.14136	-1.29071	0.196803	0.999721
ENSG00000170629	DPY19L2P2	91.7432	0.156794	0.121593	1.2895	0.197224	0.999721
ENSG00000117143	UAP1	152.949	-0.108546	0.0842268	-1.28873	0.197492	0.999721
ENSG00000127954	STEAP4	791.856	0.251292	0.195051	1.28834	0.197628	0.999721
ENSG00000140299	BNIP2	2305.8	-0.127711	0.099152	-1.28803	0.197735	0.999721
ENSG00000135919	SERPINE2	122.842	-0.185319	0.143928	-1.28758	0.197891	0.999721
ENSG00000213995	NAXD	349.981	0.0746268	0.0579664	1.28741	0.19795	0.999721
ENSG00000035664	DAPK2	95.2317	-0.164868	0.128104	-1.28698	0.198101	0.999721
ENSG00000108950	FAM20A	41.2331	0.522057	0.405647	1.28697	0.198104	0.999721
ENSG00000050344	NFE2L3	101.188	-0.185402	0.144094	-1.28667	0.198209	0.999721
ENSG00000116741	RGS2	6910.33	-0.197957	0.153857	-1.28663	0.198222	0.999721
ENSG00000176915	ANKLE2	1193.36	0.0771022	0.0599361	1.28641	0.198301	0.999721
ENSG00000173465	SSSCA1	99.012	0.16726	0.130036	1.28625	0.198355	0.999721
ENSG00000166803	PCLAF	106.304	-0.263598	0.204935	-1.28625	0.198357	0.999721
ENSG00000130830	MPP1	10425.7	0.21808	0.169573	1.28606	0.198423	0.999721
ENSG00000162894	FCMR	4106.65	-0.0924396	0.0719218	-1.28528	0.198695	0.999721
ENSG00000174353	STAG3L3	299.814	0.152247	0.118498	1.28481	0.19886	0.999721
ENSG00000130299	GTPBP3	185.181	0.145299	0.113105	1.28463	0.19892	0.999721
ENSG00000167191	GPRC5B	20.061	-0.313831	0.244324	-1.28449	0.198971	0.999721
ENSG00000164114	MAP9	106.254	0.225847	0.175856	1.28427	0.199046	0.999721
ENSG00000100614	PPM1A	3696.12	0.215297	0.167709	1.28375	0.199228	0.999721
ENSG00000100412	ACO2	1403.92	0.0799163	0.0622638	1.28351	0.199313	0.999721
ENSG00000088682	COQ9	296.301	-0.0788406	0.0614304	-1.28341	0.199347	0.999721
ENSG00000130544	ZNF557	161.799	-0.127395	0.0992791	-1.2832	0.199423	0.999721
ENSG00000255769	GOLGA2P10	11.2312	0.327441	0.255178	1.28318	0.199427	0.999721
ENSG00000129472	RAB2B	1160.41	0.171696	0.133825	1.28299	0.199495	0.999721
ENSG00000007312	CD79B	1334.86	0.160328	0.124966	1.28298	0.199499	0.999721
ENSG00000121211	MND1	11.3249	-0.306769	0.239122	-1.2829	0.199527	0.999721
ENSG00000140905	GCSH	46.86	0.180843	0.140967	1.28287	0.199537	0.999721
ENSG00000166855	CLPX	1189.37	0.151179	0.117864	1.28266	0.199611	0.999721
ENSG00000274110	LAIR1	748.512	0.225338	0.175682	1.28265	0.199616	0.999721
ENSG00000062194	GPBP1	1924.04	-0.0611288	0.047659	-1.28263	0.199622	0.999721
ENSG00000127837	AAMP	826.602	0.0827263	0.0645171	1.28224	0.199759	0.999721
ENSG00000179588	ZFPM1	263.184	0.153926	0.120104	1.28161	0.19998	0.999721
ENSG00000034713	GABARAPL2	7969.22	0.227011	0.177136	1.28157	0.199995	0.999721
ENSG00000089012	SIRPG	452.804	-0.114249	0.0891676	-1.28129	0.200093	0.999721
ENSG00000117394	SLC2A1	6026.73	0.265607	0.207302	1.28126	0.200103	0.999721
ENSG00000187260	WDR86	43.7419	-0.317993	0.248218	-1.2811	0.200157	0.999721
ENSG00000138778	CENPE	265.275	-0.246452	0.192377	-1.28109	0.200163	0.999721
ENSG00000196453	ZNF777	246.783	0.109365	0.0853704	1.28106	0.200172	0.999721
ENSG00000004660	CAMKK1	156.966	0.120515	0.0941027	1.28067	0.200309	0.999721
ENSG00000151304	SRFBP1	131.591	0.126306	0.0986538	1.2803	0.200441	0.999721
ENSG00000102172	SMS	539.362	-0.104555	0.0816954	-1.27982	0.200609	0.999721
ENSG00000135926	TMBIM1	2112.16	0.102063	0.0797585	1.27965	0.20067	0.999721
ENSG00000089902	RCOR1	1029.43	-0.140172	0.109562	-1.27939	0.200759	0.999721
ENSG00000130714	POMT1	305.565	0.172547	0.134878	1.27928	0.200798	0.999721
ENSG00000258405	ZNF578	27.0892	0.260956	0.203987	1.27928	0.2008	0.999721
ENSG00000168137	SETD5	1442.6	0.171308	0.13393	1.27909	0.200867	0.999721
ENSG00000243749	TMEM35B	165.244	-0.165174	0.129167	-1.27876	0.20098	0.999721
ENSG00000163002	NUP35	74.4406	-0.127	0.099326	-1.27862	0.20103	0.999721
ENSG00000168795	ZBTB5	291.016	0.0987775	0.0772535	1.27862	0.201032	0.999721
ENSG00000137507	LRRC32	15.1263	0.352537	0.275768	1.27838	0.201115	0.999721
ENSG00000237100	C6orf136	100.315	-0.152872	0.119614	-1.27804	0.201234	0.999721
ENSG00000109113	RAB34	128.217	0.17111	0.133888	1.27801	0.201247	0.999721
ENSG00000233757		20.095	0.327526	0.256328	1.27776	0.201333	0.999721
ENSG00000149929	HIRIP3	202.66	-0.0984169	0.077025	-1.27773	0.201346	0.999721
ENSG00000161791	FMNL3	1103.1	-0.0919614	0.0719728	-1.27772	0.201346	0.999721
ENSG00000141279	NPEPPS	1692.75	0.122659	0.096028	1.27733	0.201487	0.999721
ENSG00000243199		35.2455	0.278958	0.218439	1.27705	0.201584	0.999721
ENSG00000150477	KIAA1328	111.555	0.157344	0.123234	1.2768	0.201674	0.999721
ENSG00000211820	TRAV41	29.6105	-0.182782	0.143167	-1.27671	0.201706	0.999721
ENSG00000141446	ESCO1	439.329	-0.0852872	0.0668228	-1.27632	0.201843	0.999721
ENSG00000076043	REXO2	1236.73	0.18173	0.14243	1.27593	0.20198	0.999721
ENSG00000121281	ADCY7	4125.96	0.134057	0.105093	1.2756	0.202096	0.999721
ENSG00000181666	HKR1	399.305	0.103722	0.0813245	1.27541	0.202165	0.999721
ENSG00000197780	TAF13	122.461	-0.131008	0.102738	-1.27517	0.20225	0.999721
ENSG00000185201	IFITM2	2231.47	-0.220968	0.173346	-1.27472	0.202408	0.999721
ENSG00000276358	PLEKHM1	787.026	0.0971033	0.0761886	1.27451	0.202482	0.999721
ENSG00000131899	LLGL1	348.588	0.0868702	0.0681621	1.27446	0.202499	0.999721
ENSG00000236609	ZNF853	97.2419	0.136445	0.107073	1.27431	0.202553	0.999721
ENSG00000170425	ADORA2B	17.7589	0.264603	0.207694	1.27401	0.202661	0.999721
ENSG00000109911	ELP4	282.237	-0.126179	0.0990452	-1.27395	0.20268	0.999721
ENSG00000165949	IFI27	257.36	0.429523	0.337158	1.27395	0.202681	0.999721
ENSG00000119723	COQ6	167.295	0.117994	0.0926942	1.27294	0.203039	0.999721
ENSG00000170270	GON7	105.828	-0.145586	0.114449	-1.27206	0.20335	0.999721
ENSG00000145423	SFRP2	48.6056	-0.279712	0.219903	-1.27198	0.203381	0.999721
ENSG00000122359	ANXA11	3707.45	-0.16483	0.129629	-1.27156	0.203531	0.999721
ENSG00000156162	DPY19L4	249.302	0.216021	0.17006	1.27026	0.20399	0.999721
ENSG00000221923	ZNF880	124.821	0.150801	0.118737	1.27005	0.204068	0.999721
ENSG00000182118	FAM89A	47.4154	0.199714	0.157263	1.26994	0.204105	0.999721
ENSG00000082515	MRPL22	175.835	0.13206	0.10403	1.26945	0.204282	0.999721
ENSG00000115520	COQ10B	434.872	-0.0857595	0.0675645	-1.2693	0.204335	0.999721
ENSG00000157303	SUSD3	478.623	-0.133104	0.104924	-1.26858	0.204592	0.999721
ENSG00000184786	TCTE3	15.9236	0.185126	0.146068	1.2674	0.205014	0.999721
ENSG00000198959	TGM2	850.931	0.26051	0.205748	1.26617	0.205454	0.999721
ENSG00000143420	ENSA	1294.28	0.0693164	0.0547476	1.26611	0.205474	0.999721
ENSG00000163655	GMPS	767.96	-0.0613131	0.0484422	-1.2657	0.205621	0.999721
ENSG00000075624	ACTB	69661	-0.191717	0.151476	-1.26566	0.205636	0.999721
ENSG00000196371	FUT4	428.573	-0.15452	0.122102	-1.2655	0.205692	0.999721
ENSG00000274137	MYOM2	215.139	0.356378	0.281656	1.26529	0.205766	0.999721
ENSG00000196943	NOP9	610.283	0.0726937	0.0574556	1.26521	0.205795	0.999721
ENSG00000153767	GTF2E1	236.249	-0.131237	0.103732	-1.26516	0.205815	0.999721
ENSG00000141194	OR4D1	41.7331	-0.168156	0.132929	-1.265	0.205871	0.999721
ENSG00000156050	FAM161B	50.7863	-0.144205	0.114003	-1.26492	0.205901	0.999721
ENSG00000160401	CFAP157	8.96773	-0.208299	0.164711	-1.26464	0.206002	0.999721
ENSG00000138459	SLC35A5	436.7	-0.106901	0.0845342	-1.26459	0.206019	0.999721
ENSG00000197857	ZNF44	211.825	-0.104067	0.0823053	-1.2644	0.206086	0.999721
ENSG00000284981		262.851	0.221257	0.174997	1.26434	0.206107	0.999721
ENSG00000171467	ZNF318	1086.32	0.151411	0.119802	1.26384	0.206288	0.999721
ENSG00000117616	RSRP1	2813.5	0.111084	0.0879321	1.2633	0.206482	0.999721
ENSG00000149798	CDC42EP2	134.17	-0.271121	0.214643	-1.26313	0.206544	0.999721
ENSG00000127580	WDR24	179.952	-0.172186	0.136357	-1.26276	0.206675	0.999721
ENSG00000186073	C15orf41	61.1787	0.146521	0.116046	1.26261	0.206728	0.999721
ENSG00000169122	FAM110B	56.0926	-0.241276	0.191144	-1.26227	0.206851	0.999721
ENSG00000105048	TNNT1	88.8073	-0.393288	0.311628	-1.26204	0.206933	0.999721
[truncated: 12,057 more rows]
