# Supplementary material for: Perinatal granulopoiesis and risk of pediatric asthma
Source: eLife. 2021 Feb 10;10:e63745. doi: 10.7554/eLife.63745 (PMC7889076; doi:10.7554/eLife.63745)
Supplement: Supplementary file 7. [file elife-63745-supp7.xlsx]

## Sheet: Current Asthma Mid-Childhood
Table S7a. Demographics, Current Asthma Response Mid-Childhood
	No Asthma	Asthma	Missing Data
	(n=171)	(n=35)	(n=152)
Maternal Pre-Pregnancy BMI (kg/m2)
Underweight, <18.5	6 (3.5%)	1 (2.9%)	8 (5.3%)
Normal, 18.5-24.9	103 (60.2%)	21 (60.0%)	90 (59.2%)
Overweight, 25-29.9	41 (24.0%)	7 (20.0%)	30 (19.7%)
Obese, >=30	20 (11.7%)	6 (17.1%)	23 (15.1%)
Maternal Race/Ethnicity
White	129 (75.4%)	21 (60.0%)	105 (69.1%)
Black	14 (8.2%)	6 (17.1%)	27 (17.8%)
Hispanic	5 (2.9%)	5 (14.3%)	9 (5.9%)
Other	23 (13.5%)	3 (8.6%)	9 (5.9%)
>= College Graduate
No	51 (29.8%)	13 (37.1%)	64 (42.1%)
Yes	120 (70.2%)	22 (62.9%)	86 (56.6%)
Maternal Atopy
No	118 (69.0%)	21 (60.0%)	92 (60.5%)
Yes	53 (31.0%)	14 (40.0%)	58 (38.2%)
Any Antibiotics During Pregnancy
No	125 (73.1%)	26 (74.3%)	99 (65.1%)
Yes	46 (26.9%)	9 (25.7%)	53 (34.9%)
Maternal Smoking During Pregnancy, 6m or 1yr
No	161 (94.2%)	31 (88.6%)	125 (82.2%)
Yes	10 (5.8%)	4 (11.4%)	27 (17.8%)
Mode of Delivery
Vaginal	138 (80.7%)	30 (85.7%)	123 (80.9%)
C-Section	33 (19.3%)	5 (14.3%)	29 (19.1%)
Gestational Age (Wks)
<37	4 (2.3%)	5 (14.3%)	4 (2.6%)
37-42	163 (95.3%)	30 (85.7%)	145 (95.4%)
>42	4 (2.3%)	0 (0%)	3 (2.0%)
Mean (SD)	39.9 (1.56)	39.0 (2.46)	39.6 (1.26)
Sex
Male	83 (48.5%)	25 (71.4%)	83 (54.6%)
Female	88 (51.5%)	10 (28.6%)	69 (45.4%)
Child's Race/Ethnicity
White	121 (70.8%)	19 (54.3%)	104 (68.4%)
Black	19 (11.1%)	6 (17.1%)	27 (17.8%)
Hispanic	4 (2.3%)	4 (11.4%)	9 (5.9%)
Other	27 (15.8%)	6 (17.1%)	10 (6.6%)
Birthweight Adjusted for Gestational Age (Z-Score)
SGA (< -1)	12 (7.0%)	3 (8.6%)	14 (9.2%)
NGA (-1, 1)	117 (68.4%)	22 (62.9%)	107 (70.4%)
LGA (> 1)	42 (24.6%)	10 (28.6%)	31 (20.4%)
Mean (SD)	0.298 (0.949)	0.337 (1.01)	0.254 (0.896)
PGLYRP-1 (Z-score)
Mean (SD)	0.0997 (0.952)	-0.568 (1.13)	0.0186 (0.985)
Median [Min, Max]	0.177 [-2.10, 3.11]	-0.349 [-3.35, 1.46]	0.0499 [-2.54, 2.29]
sIL6Rα (Z-score)
Mean (SD)	0.0153 (1.07)	-0.137 (0.853)	0.0143 (0.948)
Median [Min, Max]	0.0595 [-3.34, 2.82]	-0.188 [-2.12, 1.37]	-0.0269 [-2.65, 2.39]

## Sheet: Ever Asthma Mid-Childhood
Table S7b. Demographics, Ever Asthma Response Mid-Childhood
	No Asthma	Asthma	Missing Data
	(n=188)	(n=42)	(n=128)
Maternal Pre-Pregnancy BMI (kg/m2)
Underweight, <18.5	7 (3.7%)	1 (2.4%)	7 (5.5%)
Normal, 18.5-24.9	114 (60.6%)	27 (64.3%)	73 (57.0%)
Overweight, 25-29.9	42 (22.3%)	7 (16.7%)	29 (22.7%)
Obese, >=30	24 (12.8%)	7 (16.7%)	18 (14.1%)
Maternal Race/Ethnicity
White	136 (72.3%)	26 (61.9%)	93 (72.7%)
Black	20 (10.6%)	7 (16.7%)	20 (15.6%)
Hispanic	7 (3.7%)	6 (14.3%)	6 (4.7%)
Other	25 (13.3%)	3 (7.1%)	7 (5.5%)
>= College Graduate
No	59 (31.4%)	16 (38.1%)	53 (41.4%)
Yes	129 (68.6%)	26 (61.9%)	73 (57.0%)
Maternal Atopy
No	128 (68.1%)	25 (59.5%)	78 (60.9%)
Yes	60 (31.9%)	17 (40.5%)	48 (37.5%)
Any Antibiotics During Pregnancy
No	137 (72.9%)	32 (76.2%)	81 (63.3%)
Yes	51 (27.1%)	10 (23.8%)	47 (36.7%)
Maternal Smoking During Pregnancy, 6m or 1yr
No	177 (94.1%)	38 (90.5%)	102 (79.7%)
Yes	11 (5.9%)	4 (9.5%)	26 (20.3%)
Mode of Delivery
Vaginal	151 (80.3%)	36 (85.7%)	104 (81.2%)
C-Section	37 (19.7%)	6 (14.3%)	24 (18.8%)
Gestational Age (Wks)
<37	4 (2.1%)	5 (11.9%)	4 (3.1%)
37-42	179 (95.2%)	37 (88.1%)	122 (95.3%)
>42	5 (2.7%)	0 (0%)	2 (1.6%)
Mean (SD)	39.8 (1.52)	39.2 (2.30)	39.6 (1.29)
Sex
Male	94 (50.0%)	30 (71.4%)	67 (52.3%)
Female	94 (50.0%)	12 (28.6%)	61 (47.7%)
Child's Race/Ethnicity
White	128 (68.1%)	23 (54.8%)	93 (72.7%)
Black	24 (12.8%)	8 (19.0%)	20 (15.6%)
Hispanic	6 (3.2%)	5 (11.9%)	6 (4.7%)
Other	30 (16.0%)	6 (14.3%)	7 (5.5%)
Missing	0 (0%)	0 (0%)	2 (1.6%)
Birthweight Adjusted for Gestational Age (Z-Score)
SGA (< -1)	13 (6.9%)	3 (7.1%)	13 (10.2%)
NGA (-1, 1)	130 (69.1%)	27 (64.3%)	89 (69.5%)
LGA (> 1)	45 (23.9%)	12 (28.6%)	26 (20.3%)
Mean (SD)	0.298 (0.951)	0.353 (0.952)	0.238 (0.898)
PGLYRP-1 (Z-score)
Mean (SD)	0.111 (0.940)	-0.515 (1.09)	0.00526 (1.01)
Median [Min, Max]	0.162 [-2.10, 3.11]	-0.357 [-3.35, 1.46]	0.0609 [-2.54, 2.29]
sIL6Rα (Z-score)
Mean (SD)	0.00924 (1.07)	-0.0656 (0.840)	0.00797 (0.941)
Median [Min, Max]	0.0179 [-3.34, 2.82]	-0.0806 [-2.12, 1.37]	0.0139 [-2.65, 2.31]

## Sheet: Current Asthma Early-Teen
Table S7c. Demographics, Current Asthma Response Early-Teen
	No Asthma	Asthma	Missing Data
	(n=152)	(n=15)	(n=191)
Maternal Pre-Pregnancy BMI (kg/m2)
Underweight, <18.5	6 (3.9%)	0 (0%)	9 (4.7%)
Normal, 18.5-24.9	86 (56.6%)	11 (73.3%)	117 (61.3%)
Overweight, 25-29.9	39 (25.7%)	3 (20.0%)	36 (18.8%)
Obese, >=30	21 (13.8%)	1 (6.7%)	27 (14.1%)
Maternal Race/Ethnicity
White	109 (71.7%)	10 (66.7%)	136 (71.2%)
Black	18 (11.8%)	2 (13.3%)	27 (14.1%)
Hispanic	6 (3.9%)	1 (6.7%)	12 (6.3%)
Other	19 (12.5%)	2 (13.3%)	14 (7.3%)
>= College Graduate
No	46 (30.3%)	3 (20.0%)	79 (41.4%)
Yes	106 (69.7%)	12 (80.0%)	110 (57.6%)
Maternal Atopy
No	100 (65.8%)	7 (46.7%)	124 (64.9%)
Yes	52 (34.2%)	8 (53.3%)	65 (34.0%)
Any Antibiotics During Pregnancy
No	108 (71.1%)	12 (80.0%)	130 (68.1%)
Yes	44 (28.9%)	3 (20.0%)	61 (31.9%)
Maternal Smoking During Pregnancy, 6m or 1yr
No	140 (92.1%)	14 (93.3%)	163 (85.3%)
Yes	12 (7.9%)	1 (6.7%)	28 (14.7%)
Mode of Delivery
Vaginal	126 (82.9%)	10 (66.7%)	155 (81.2%)
C-Section	26 (17.1%)	5 (33.3%)	36 (18.8%)
Gestational Age (Wks)
<37	4 (2.6%)	1 (6.7%)	8 (4.2%)
37-42	144 (94.7%)	14 (93.3%)	180 (94.2%)
>42	4 (2.6%)	0 (0%)	3 (1.6%)
Mean (SD)	39.7 (1.67)	38.7 (2.32)	39.8 (1.40)
Sex
Male	77 (50.7%)	11 (73.3%)	103 (53.9%)
Female	75 (49.3%)	4 (26.7%)	88 (46.1%)
Child's Race/Ethnicity
White	105 (69.1%)	9 (60.0%)	130 (68.1%)
Black	19 (12.5%)	2 (13.3%)	31 (16.2%)
Hispanic	5 (3.3%)	0 (0%)	12 (6.3%)
Other	23 (15.1%)	4 (26.7%)	16 (8.4%)
Birthweight Adjusted for Gestational Age (Z-Score)
SGA (< -1)	15 (9.9%)	1 (6.7%)	13 (6.8%)
NGA (-1, 1)	107 (70.4%)	11 (73.3%)	128 (67.0%)
LGA (> 1)	30 (19.7%)	3 (20.0%)	50 (26.2%)
Mean (SD)	0.189 (0.957)	0.154 (0.851)	0.369 (0.911)
PGLYRP-1 (Z-score)
Mean (SD)	0.0638 (1.01)	-0.383 (0.993)	-0.0207 (0.988)
Median [Min, Max]	0.124 [-3.08, 3.11]	-0.188 [-3.35, 1.10]	0.0479 [-3.30, 2.35]
sIL6Rα (Z-score)
Mean (SD)	-0.000640 (1.03)	-0.278 (0.633)	0.0223 (1.00)
Median [Min, Max]	-0.0125 [-2.58, 2.82]	-0.242 [-1.50, 0.612]	0.136 [-3.34, 2.38]

## Sheet: Ever Asthma Early-Teen
Table S7d. Demographics, Ever Asthma Response Early-Teen
	No Asthma	Asthma	Missing Data
	(n=152)	(n=44)	(n=162)
Maternal Pre-Pregnancy BMI (kg/m2)
Underweight, <18.5	6 (3.9%)	1 (2.3%)	8 (4.9%)
Normal, 18.5-24.9	86 (56.6%)	28 (63.6%)	100 (61.7%)
Overweight, 25-29.9	39 (25.7%)	11 (25.0%)	28 (17.3%)
Obese, >=30	21 (13.8%)	4 (9.1%)	24 (14.8%)
Maternal Race/Ethnicity
White	109 (71.7%)	29 (65.9%)	117 (72.2%)
Black	18 (11.8%)	9 (20.5%)	20 (12.3%)
Hispanic	6 (3.9%)	3 (6.8%)	10 (6.2%)
Other	19 (12.5%)	3 (6.8%)	13 (8.0%)
Missing	0 (0%)	0 (0%)	2 (1.2%)
>= College Graduate
No	46 (30.3%)	14 (31.8%)	68 (42.0%)
Yes	106 (69.7%)	30 (68.2%)	92 (56.8%)
Maternal Atopy
No	100 (65.8%)	27 (61.4%)	104 (64.2%)
Yes	52 (34.2%)	17 (38.6%)	56 (34.6%)
Any Antibiotics During Pregnancy
No	108 (71.1%)	31 (70.5%)	111 (68.5%)
Yes	44 (28.9%)	13 (29.5%)	51 (31.5%)
Maternal Smoking During Pregnancy, 6m or 1yr
No	140 (92.1%)	41 (93.2%)	136 (84.0%)
Yes	12 (7.9%)	3 (6.8%)	26 (16.0%)
Mode of Delivery
Vaginal	126 (82.9%)	35 (79.5%)	130 (80.2%)
C-Section	26 (17.1%)	9 (20.5%)	32 (19.8%)
Gestational Age (Wks)
<37	4 (2.6%)	3 (6.8%)	6 (3.7%)
37-42	144 (94.7%)	41 (93.2%)	153 (94.4%)
>42	4 (2.6%)	0 (0%)	3 (1.9%)
Mean (SD)	39.7 (1.67)	39.1 (2.09)	39.8 (1.26)
Sex
Male	77 (50.7%)	33 (75.0%)	81 (50.0%)
Female	75 (49.3%)	11 (25.0%)	81 (50.0%)
Child's Race/Ethnicity
White	105 (69.1%)	24 (54.5%)	115 (71.0%)
Black	19 (12.5%)	9 (20.5%)	24 (14.8%)
Hispanic	5 (3.3%)	3 (6.8%)	9 (5.6%)
Other	23 (15.1%)	8 (18.2%)	12 (7.4%)
Birthweight Adjusted for Gestational Age (Z-Score)
SGA (< -1)	15 (9.9%)	2 (4.5%)	12 (7.4%)
NGA (-1, 1)	107 (70.4%)	35 (79.5%)	104 (64.2%)
LGA (> 1)	30 (19.7%)	7 (15.9%)	46 (28.4%)
Mean (SD)	0.189 (0.957)	0.157 (0.767)	0.406 (0.936)
PGLYRP-1 (Z-score)
Mean (SD)	0.0638 (1.01)	-0.413 (1.03)	0.0524 (0.958)
Median [Min, Max]	0.124 [-3.08, 3.11]	-0.196 [-3.35, 1.42]	0.0772 [-2.54, 2.35]
sIL6Rα (Z-score)
Mean (SD)	-0.000640 (1.03)	-0.0774 (0.932)	0.0216 (0.995)
Median [Min, Max]	-0.0125 [-2.58, 2.82]	0.0497 [-2.12, 1.75]	0.0460 [-3.34, 2.38]
